# Supplementary material for: ERK2-topoisomerase II regulatory axis is important for gene activation in immediate early genes
Source: Springer Nature journal article supplement (doi:10.1038/s41467-023-44089-y), 2023-12-14

# MASCOT Search Results

## Protein View: Q02880

DNA topoisomerase 2-beta OS=Homo sapiens OX=9606 GN=TOP2B PE=1 SV=3

Database: Uniprot\_Proteome\_Human  
Score: 18972  
Monoisotopic mass (M<sub>r</sub>): 184122  
Calculated pI: 8.14

Sequence similarity is available as [an NCBI BLAST search of Q02880 against nr.](#)

### Search parameters

MS data file: File Name: Z:\SN22\SN221362\_deTOP2B\_control\_lul.raw;File Path: ;File Time: 3/1/2023 7:06:29 AM;File Size: 352609374 [Byte]  
Enzyme: Trypsin: cuts C-term side of KR unless next residue is P.  
Fixed modifications: **Carbamidomethyl (C)**  
Variable modifications: **Acetyl (Protein N-term), Oxidation (M), Phospho (ST), Phospho (Y)**

### Protein sequence coverage: 65%

Matched peptides shown in **bold red**.

```
1  MAKSGGCGAG  AGVGGNGAL  TWVTLFDQNN  AAKKEESETA  NKNDSSKLLS
51  VERVYQKKTQ  LEHILLRPDT  YIGSVEPLTQ  FMWVYDEVDG  MNCREVTFFP
101  GLYKIFDEIL  VNAADNKQRD  KNMTCIKVSI  DPESNIISIW  NNGKGIPVVE
151  HKVEKVVVPA  LIFGQLLTSS  NYDDDEKVT  GGRNGYGAKL  CNIFSTKFTV
201  ETACKEYKHS  FKQTWMNMM  KTSEAKIKHF  DGEDYTCITF  QPDLSKFKME
251  KLDRDIVALM  TRRAYDLAGS  CRGVKVMFNG  KKLPVNGFRS  YVDLYVKDKL
301  DETVALKVI  HELANERWDV  CLTLSEKGFQ  QISFVNSIAT  TKGGRHVDYV
351  VDQVVGKLIE  VVKKKNKAGV  SVKPFQVKNH  IWVFINCLIE  NPTFDSQTK
401  NMTLQPKSFG  SKCQLSEKFF  KAASNCGIVE  SILNWVKFKA  QTQLNKCSS
451  VKYSKIKGIP  KLDDANDAGG  KHSLCTLIL  TEGDSAKSLA  VSGLGVIGRD
501  RYGVFPLRGK  ILNVREASHK  QIMENAEINN  IKIVGLQYK  KSYDDAESLK
551  TLRYGKIMIM  TDQQDGSIH  KGLLINFHH  NWPSLLKHGF  LEEFITPIVK
601  ASKNQELSF  YSIPEFDEWK  KHIENQKAWK  IKYYKGLGTS  TAKEAKEYFA
651  DMERHRILFR  YAGPEDDAAI  TLAFSKKKID  DRKEWLTNFM  EDRRQRLHG
701  LPEQFLYGTA  TKHLTYNDFI  NKELLLSNS  DNERSIPSLV  DGFKPQRKV
751  LFTCFKRNDK  REVKVAQLAG  SVAEMSAYHH  GEQALMMTIV  NLAQNFVGSN
801  NINLLQPIGQ  FGTRLHGGKD  AASPRYIFTM  LSTLARLLFP  AVDDNLLKFL
851  YDDNQRVEPE  WYIPIPMVL  INGAEGIGTG  WACKLPNYDA  REIVNNVRRM
901  LDGLDPHPML  PNYKNFKGTI  QELGQNOYAV  SGEIFVVDRN  TVEITELPVR
951  TWTQVYKEQV  LEPMLNGTDK  TPALISDYKE  YHTDTTVKFV  VKMTEEKLAO
1001 AEAAGLHKVF  KLQTLTCNS  MVLFDHMGCL  KKYETVQDIL  KEFFDLRLSY
1051 YLRKEWLVG  MLGAESTKLN  NQARFILEKI  QKITIENRS  KKDLIQMLVQ
1101 RGYESDPVKA  WKEAQEKAE  EDETQNQHDD  SSSDSGTPSG  PDFNYILNMS
1151 LWSLTKEKVE  ELIKQRDAKG  REVNDLKRKS  PSDLWKEDLA  AFVEELDKVE
1201 SQEREDVLAG  MSGKAIKGKV  GKPKVKLQL  EETMPSPYGR  RIPEITAMK
1251 ADASKLLLKK  KGDLDTAAV  KVEFEDEFSG  APVEGAGEEA  LTPSVPINKG
1301 PKPKREKKEP  GTRVRKTPTS  SGKPSAKKVK  KRNPWSDDES  KSESDLEETE
1351 VPVLPRDSLL  RRAAAERPKY  TFDFSEEEDD  DADDDDDDNN  DLEELKVKAS
1401 PITNDGEDEF  VPSDGLDKDE  YTFSPGKSKA  TPEKSLHDKK  SQDFGNLFSF
1451 PSYSQSEDD  SAKFDSNEED  SASVFSPSFG  LKQTDKVPSK  TVAAKKGKPS
1501 SDTVPKPKRA  PKQKVVEAV  NSDSDSEFGI  PKKTTTPKGK  GRGAKKRKAS
1551 GSENEDGYNP  GRKTSKTTSK  KPKTSFDQD  SDVDIFFSDF  PTEPPSLPRT
1601 GRARKEVKYF  AESDEEEDDV  DFAMFN
```

Unformatted sequence string: **1626 residues** (for pasting into other applications).

Sort by  residue number  increasing mass  decreasing mass  
Show  matched peptides only  predicted peptides also

| Query                | Start - End | Observed | Mr (expt) | Mr (calc) | ppm   | M | Score | Expect  | Rank | U | Peptide             |
|----------------------|-------------|----------|-----------|-----------|-------|---|-------|---------|------|---|---------------------|
| <a href="#">1779</a> | 34 - 42     | 518.2515 | 1034.4885 | 1034.4880 | 0.48  | 1 | 42    | 0.0034  | 1    | U | K.KEESETANK.N       |
| <a href="#">6439</a> | 34 - 47     | 783.8663 | 1565.7180 | 1565.7169 | 0.72  | 2 | 32    | 0.003   | 1    | U | K.KEESETANKNDSSK.K  |
| <a href="#">7502</a> | 34 - 48     | 847.9134 | 1693.8123 | 1693.8118 | 0.30  | 3 | 47    | 0.00022 | 1    | U | K.KEESETANKNDSSKK.L |
| <a href="#">7503</a> | 34 - 48     | 565.6116 | 1693.8128 | 1693.8118 | 0.60  | 3 | 25    | 0.026   | 1    | U | K.KEESETANKNDSSKK.L |
| <a href="#">7504</a> | 34 - 48     | 847.9140 | 1693.8135 | 1693.8118 | 0.99  | 3 | 30    | 0.0016  | 1    | U | K.KEESETANKNDSSKK.L |
| <a href="#">5258</a> | 105 - 117   | 487.9234 | 1460.7485 | 1460.7511 | -1.77 | 0 | 35    | 0.0043  | 1    | U | K.IFDEILVNAADNK.Q   |
| <a href="#">5259</a> | 105 - 117   | 731.3818 | 1460.7490 | 1460.7511 | -1.41 | 0 | 109   | 9.6e-10 | 1    | U | K.IFDEILVNAADNK.Q   |
| <a href="#">5260</a> | 105 - 117   | 487.9239 | 1460.7500 | 1460.7511 | -0.75 | 0 | 31    | 0.013   | 1    | U | K.IFDEILVNAADNK.Q   |
| <a href="#">5263</a> | 105 - 117   | 487.9241 | 1460.7505 | 1460.7511 | -0.42 | 0 | 27    | 0.017   | 1    | U | K.IFDEILVNAADNK.Q   |
| <a href="#">5264</a> | 105 - 117   | 731.3825 | 1460.7505 | 1460.7511 | -0.39 | 0 | 67    | 2.7e-06 | 1    | U | K.IFDEILVNAADNK.Q   |
| <a href="#">5265</a> | 105 - 117   | 487.9241 | 1460.7505 | 1460.7511 | -0.38 | 0 | 22    | 0.018   | 1    | U | K.IFDEILVNAADNK.Q   |
| <a href="#">5266</a> | 105 - 117   | 487.9241 | 1460.7506 | 1460.7511 | -0.36 | 0 | 25    | 0.024   | 1    | U | K.IFDEILVNAADNK.Q   |
| <a href="#">5267</a> | 105 - 117   | 487.9241 | 1460.7506 | 1460.7511 | -0.34 | 0 | 27    | 0.021   | 1    | U | K.IFDEILVNAADNK.Q   |
| <a href="#">5268</a> | 105 - 117   | 487.9242 | 1460.7507 | 1460.7511 | -0.30 | 0 | 22    | 0.043   | 1    | U | K.IFDEILVNAADNK.Q   |
| <a href="#">5269</a> | 105 - 117   | 487.9242 | 1460.7507 | 1460.7511 | -0.25 | 0 | 25    | 0.013   | 1    | U | K.IFDEILVNAADNK.Q   |
| <a href="#">5271</a> | 105 - 117   | 731.3827 | 1460.7508 | 1460.7511 | -0.17 | 0 | 71    | 1.3e-06 | 1    | U | K.IFDEILVNAADNK.Q   |
| <a href="#">5272</a> | 105 - 117   | 731.3827 | 1460.7508 | 1460.7511 | -0.16 | 0 | 51    | 7.6e-05 | 1    | U | K.IFDEILVNAADNK.Q   |
| <a href="#">5273</a> | 105 - 117   | 487.9242 | 1460.7509 | 1460.7511 | -0.13 | 0 | 43    | 0.0012  | 1    | U | K.IFDEILVNAADNK.Q   |
| <a href="#">5274</a> | 105 - 117   | 487.9242 | 1460.7509 | 1460.7511 | -0.11 | 0 | 35    | 0.0045  | 1    | U | K.IFDEILVNAADNK.Q   |

| Query                 | Start - End | Observed  | Mr (expt) | Mr (calc) | ppm     | M | Score | Expect  | Rank | U | Peptide                                 |
|-----------------------|-------------|-----------|-----------|-----------|---------|---|-------|---------|------|---|-----------------------------------------|
| <a href="#">5275</a>  | 105 - 117   | 731.3828  | 1460.7510 | 1460.7511 | -0.051  | 0 | 73    | 8.7e-07 | 1    | 1 | K.IFDEILVNAADNK.Q                       |
| <a href="#">5276</a>  | 105 - 117   | 487.9243  | 1460.7510 | 1460.7511 | -0.049  | 0 | 40    | 0.0029  | 1    | 1 | K.IFDEILVNAADNK.Q                       |
| <a href="#">5277</a>  | 105 - 117   | 487.9243  | 1460.7510 | 1460.7511 | -0.049  | 0 | 27    | 0.026   | 1    | 1 | K.IFDEILVNAADNK.Q                       |
| <a href="#">5278</a>  | 105 - 117   | 487.9243  | 1460.7511 | 1460.7511 | -0.0075 | 0 | 38    | 0.012   | 1    | 1 | K.IFDEILVNAADNK.Q                       |
| <a href="#">5279</a>  | 105 - 117   | 487.9243  | 1460.7511 | 1460.7511 | -0.0075 | 0 | 32    | 0.0044  | 1    | 1 | K.IFDEILVNAADNK.Q                       |
| <a href="#">5280</a>  | 105 - 117   | 731.3829  | 1460.7512 | 1460.7511 | 0.086   | 0 | 66    | 6.8e-06 | 1    | 1 | K.IFDEILVNAADNK.Q                       |
| <a href="#">5281</a>  | 105 - 117   | 487.9244  | 1460.7512 | 1460.7511 | 0.095   | 0 | 43    | 0.00063 | 1    | 1 | K.IFDEILVNAADNK.Q                       |
| <a href="#">5282</a>  | 105 - 117   | 487.9244  | 1460.7513 | 1460.7511 | 0.14    | 0 | 49    | 0.0007  | 1    | 1 | K.IFDEILVNAADNK.Q                       |
| <a href="#">5283</a>  | 105 - 117   | 731.3829  | 1460.7513 | 1460.7511 | 0.15    | 0 | 83    | 4.7e-07 | 1    | 1 | K.IFDEILVNAADNK.Q                       |
| <a href="#">5284</a>  | 105 - 117   | 731.3830  | 1460.7513 | 1460.7511 | 0.18    | 0 | 69    | 2.4e-06 | 1    | 1 | K.IFDEILVNAADNK.Q                       |
| <a href="#">5285</a>  | 105 - 117   | 731.3830  | 1460.7514 | 1460.7511 | 0.21    | 0 | 75    | 4.1e-07 | 1    | 1 | K.IFDEILVNAADNK.Q                       |
| <a href="#">5286</a>  | 105 - 117   | 731.3830  | 1460.7515 | 1460.7511 | 0.26    | 0 | 65    | 7.8e-06 | 1    | 1 | K.IFDEILVNAADNK.Q                       |
| <a href="#">5287</a>  | 105 - 117   | 487.9245  | 1460.7516 | 1460.7511 | 0.34    | 0 | 21    | 0.037   | 1    | 1 | K.IFDEILVNAADNK.Q                       |
| <a href="#">5289</a>  | 105 - 117   | 487.9246  | 1460.7518 | 1460.7511 | 0.51    | 0 | 33    | 0.011   | 1    | 1 | K.IFDEILVNAADNK.Q                       |
| <a href="#">5290</a>  | 105 - 117   | 731.3832  | 1460.7518 | 1460.7511 | 0.52    | 0 | 66    | 4e-06   | 1    | 1 | K.IFDEILVNAADNK.Q                       |
| <a href="#">5291</a>  | 105 - 117   | 731.3832  | 1460.7518 | 1460.7511 | 0.52    | 0 | 63    | 1e-05   | 1    | 1 | K.IFDEILVNAADNK.Q                       |
| <a href="#">5293</a>  | 105 - 117   | 487.9246  | 1460.7519 | 1460.7511 | 0.59    | 0 | 37    | 0.0036  | 1    | 1 | K.IFDEILVNAADNK.Q                       |
| <a href="#">5294</a>  | 105 - 117   | 731.3833  | 1460.7520 | 1460.7511 | 0.61    | 0 | 76    | 1.7e-06 | 1    | 1 | K.IFDEILVNAADNK.Q                       |
| <a href="#">5295</a>  | 105 - 117   | 487.9247  | 1460.7522 | 1460.7511 | 0.79    | 0 | 31    | 0.016   | 1    | 1 | K.IFDEILVNAADNK.Q                       |
| <a href="#">5296</a>  | 105 - 117   | 731.3838  | 1460.7531 | 1460.7511 | 1.37    | 0 | 78    | 5.9e-07 | 1    | 1 | K.IFDEILVNAADNK.Q                       |
| <a href="#">7934</a>  | 105 - 119   | 582.6445  | 1744.9117 | 1744.9108 | 0.52    | 1 | 30    | 0.014   | 1    | 1 | K.IFDEILVNAADNKQR.D                     |
| <a href="#">1697</a>  | 120 - 127   | 513.2411  | 1024.4677 | 1024.4681 | -0.40   | 1 | 28    | 0.04    | 1    | U | R.DKNMTCIK.V<br>+ Oxidation (M)         |
| <a href="#">9003</a>  | 128 - 144   | 943.4857  | 1884.9568 | 1884.9581 | -0.71   | 0 | 62    | 3.6e-06 | 1    | U | K.VSIDPESNIIISWNGK.G                    |
| <a href="#">9004</a>  | 128 - 144   | 943.4863  | 1884.9581 | 1884.9581 | -0.0037 | 0 | 69    | 1.2e-06 | 1    | U | K.VSIDPESNIIISWNGK.G                    |
| <a href="#">9005</a>  | 128 - 144   | 629.3268  | 1884.9586 | 1884.9581 | 0.24    | 0 | 59    | 2.2e-05 | 1    | U | K.VSIDPESNIIISWNGK.G                    |
| <a href="#">9006</a>  | 128 - 144   | 943.4870  | 1884.9594 | 1884.9581 | 0.68    | 0 | 59    | 9.6e-06 | 1    | U | K.VSIDPESNIIISWNGK.G                    |
| <a href="#">779</a>   | 145 - 152   | 439.7585  | 877.5024  | 877.5022  | 0.27    | 0 | 28    | 0.043   | 1    | 1 | K.GIPVVEHK.V                            |
| <a href="#">12009</a> | 153 - 177   | 948.4820  | 2842.4241 | 2842.4276 | -1.24   | 1 | 54    | 1.7e-05 | 1    | U | K.VEKVVPALIFGQLLTSSNYDDDEK.K            |
| <a href="#">11199</a> | 156 - 177   | 1244.1171 | 2486.2197 | 2486.2217 | -0.79   | 0 | 53    | 3.4e-05 | 1    | U | K.VVVPALIFGQLLTSSNYDDDEK.K              |
| <a href="#">11200</a> | 156 - 177   | 829.7473  | 2486.2200 | 2486.2217 | -0.67   | 0 | 31    | 0.011   | 1    | U | K.VVVPALIFGQLLTSSNYDDDEK.K              |
| <a href="#">11201</a> | 156 - 177   | 1244.1174 | 2486.2202 | 2486.2217 | -0.60   | 0 | 24    | 0.012   | 1    | U | K.VVVPALIFGQLLTSSNYDDDEK.K              |
| <a href="#">11202</a> | 156 - 177   | 829.7476  | 2486.2211 | 2486.2217 | -0.22   | 0 | 25    | 0.036   | 1    | U | K.VVVPALIFGQLLTSSNYDDDEK.K              |
| <a href="#">11203</a> | 156 - 177   | 829.7477  | 2486.2212 | 2486.2217 | -0.21   | 0 | 53    | 7e-05   | 1    | U | K.VVVPALIFGQLLTSSNYDDDEK.K              |
| <a href="#">11204</a> | 156 - 177   | 1244.1187 | 2486.2228 | 2486.2217 | 0.45    | 0 | 95    | 9.2e-09 | 1    | U | K.VVVPALIFGQLLTSSNYDDDEK.K              |
| <a href="#">11205</a> | 156 - 177   | 829.7482  | 2486.2229 | 2486.2217 | 0.49    | 0 | 36    | 0.0021  | 1    | U | K.VVVPALIFGQLLTSSNYDDDEK.K              |
| <a href="#">11206</a> | 156 - 177   | 829.7483  | 2486.2231 | 2486.2217 | 0.56    | 0 | 35    | 0.0073  | 1    | U | K.VVVPALIFGQLLTSSNYDDDEK.K              |
| <a href="#">11207</a> | 156 - 177   | 1244.1190 | 2486.2233 | 2486.2217 | 0.67    | 0 | 46    | 0.00036 | 1    | U | K.VVVPALIFGQLLTSSNYDDDEK.K              |
| <a href="#">11209</a> | 156 - 177   | 1244.1200 | 2486.2255 | 2486.2217 | 1.56    | 0 | 29    | 0.0033  | 1    | U | K.VVVPALIFGQLLTSSNYDDDEK.K              |
| <a href="#">11509</a> | 156 - 178   | 872.4442  | 2614.3107 | 2614.3166 | -2.27   | 1 | 39    | 0.011   | 1    | U | K.VVVPALIFGQLLTSSNYDDDEK.V              |
| <a href="#">11513</a> | 156 - 178   | 872.4460  | 2614.3162 | 2614.3166 | -0.17   | 1 | 36    | 0.028   | 1    | U | K.VVVPALIFGQLLTSSNYDDDEK.V              |
| <a href="#">11514</a> | 156 - 178   | 1308.1656 | 2614.3166 | 2614.3166 | 0.0050  | 1 | 58    | 7.4e-05 | 1    | U | K.VVVPALIFGQLLTSSNYDDDEK.V              |
| <a href="#">11516</a> | 156 - 178   | 654.5866  | 2614.3172 | 2614.3166 | 0.22    | 1 | 39    | 0.013   | 1    | U | K.VVVPALIFGQLLTSSNYDDDEK.V              |
| <a href="#">11517</a> | 156 - 178   | 872.4464  | 2614.3173 | 2614.3166 | 0.24    | 1 | 32    | 0.028   | 1    | U | K.VVVPALIFGQLLTSSNYDDDEK.V              |
| <a href="#">11519</a> | 156 - 178   | 872.4464  | 2614.3173 | 2614.3166 | 0.27    | 1 | 40    | 0.011   | 1    | U | K.VVVPALIFGQLLTSSNYDDDEK.V              |
| <a href="#">11521</a> | 156 - 178   | 872.4466  | 2614.3178 | 2614.3166 | 0.45    | 1 | 38    | 0.0098  | 1    | U | K.VVVPALIFGQLLTSSNYDDDEK.V              |
| <a href="#">11522</a> | 156 - 178   | 1308.1664 | 2614.3183 | 2614.3166 | 0.65    | 1 | 61    | 9.5e-05 | 1    | U | K.VVVPALIFGQLLTSSNYDDDEK.V              |
| <a href="#">11524</a> | 156 - 178   | 872.4468  | 2614.3185 | 2614.3166 | 0.72    | 1 | 61    | 8.7e-05 | 1    | U | K.VVVPALIFGQLLTSSNYDDDEK.V              |
| <a href="#">11526</a> | 156 - 178   | 654.5870  | 2614.3188 | 2614.3166 | 0.83    | 1 | 26    | 0.034   | 1    | U | K.VVVPALIFGQLLTSSNYDDDEK.V              |
| <a href="#">1394</a>  | 190 - 197   | 491.7550  | 981.4954  | 981.4953  | 0.084   | 0 | 42    | 0.0018  | 1    | 1 | K.LCNIFSTK.F                            |
| <a href="#">1200</a>  | 198 - 205   | 478.2307  | 954.4468  | 954.4481  | -1.35   | 0 | 19    | 0.046   | 1    | U | K.FTVEACK.E                             |
| <a href="#">3212</a>  | 213 - 221   | 600.2544  | 1198.4942 | 1198.4933 | 0.74    | 0 | 32    | 0.026   | 1    | U | K.QTWMNNMMK.T<br>+ Oxidation (M)        |
| <a href="#">3331</a>  | 213 - 221   | 608.2515  | 1214.4885 | 1214.4882 | 0.20    | 0 | 33    | 0.011   | 1    | U | K.QTWMNNMMK.T<br>+ 2 Oxidation (M)      |
| <a href="#">10569</a> | 229 - 246   | 1126.9722 | 2251.9298 | 2251.9133 | 7.31    | 0 | 46    | 9.8e-05 | 1    | U | K.HFDGEDYTCITFPDLSK.F<br>+ Phospho (ST) |
| <a href="#">3850</a>  | 252 - 262   | 637.8602  | 1273.7058 | 1273.7064 | -0.47   | 1 | 35    | 0.0036  | 1    | U | K.LDKDIVALMTR.R                         |
| <a href="#">3854</a>  | 252 - 262   | 637.8603  | 1273.7060 | 1273.7064 | -0.33   | 1 | 25    | 0.012   | 1    | U | K.LDKDIVALMTR.R                         |
| <a href="#">3855</a>  | 252 - 262   | 637.8603  | 1273.7060 | 1273.7064 | -0.27   | 1 | 71    | 4.1e-07 | 1    | U | K.LDKDIVALMTR.R                         |
| <a href="#">3856</a>  | 252 - 262   | 637.8603  | 1273.7061 | 1273.7064 | -0.25   | 1 | 38    | 0.00096 | 1    | U | K.LDKDIVALMTR.R                         |
| <a href="#">3857</a>  | 252 - 262   | 637.8603  | 1273.7061 | 1273.7064 | -0.21   | 1 | 37    | 0.0057  | 1    | U | K.LDKDIVALMTR.R                         |
| <a href="#">3860</a>  | 252 - 262   | 637.8606  | 1273.7066 | 1273.7064 | 0.16    | 1 | 57    | 8.5e-05 | 1    | U | K.LDKDIVALMTR.R                         |
| <a href="#">3862</a>  | 252 - 262   | 637.8606  | 1273.7067 | 1273.7064 | 0.25    | 1 | 64    | 1e-05   | 1    | U | K.LDKDIVALMTR.R                         |
| <a href="#">3864</a>  | 252 - 262   | 425.5762  | 1273.7069 | 1273.7064 | 0.39    | 1 | 39    | 0.0055  | 1    | U | K.LDKDIVALMTR.R                         |
| <a href="#">3865</a>  | 252 - 262   | 637.8608  | 1273.7070 | 1273.7064 | 0.45    | 1 | 28    | 0.011   | 1    | U | K.LDKDIVALMTR.R                         |
| <a href="#">3866</a>  | 252 - 262   | 637.8608  | 1273.7070 | 1273.7064 | 0.45    | 1 | 25    | 0.0048  | 1    | U | K.LDKDIVALMTR.R                         |
| <a href="#">3867</a>  | 252 - 262   | 637.8608  | 1273.7071 | 1273.7064 | 0.53    | 1 | 38    | 0.00066 | 1    | U | K.LDKDIVALMTR.R                         |
| <a href="#">3868</a>  | 252 - 262   | 637.8609  | 1273.7073 | 1273.7064 | 0.74    | 1 | 34    | 0.005   | 1    | U | K.LDKDIVALMTR.R                         |
| <a href="#">3981</a>  | 252 - 262   | 645.8572  | 1289.6999 | 1289.7013 | -1.06   | 1 | 49    | 0.00012 | 1    | U | K.LDKDIVALMTR.R<br>+ Oxidation (M)      |
| <a href="#">3982</a>  | 252 - 262   | 645.8574  | 1289.7003 | 1289.7013 | -0.81   | 1 | 40    | 0.0015  | 1    | U | K.LDKDIVALMTR.R<br>+ Oxidation (M)      |
| <a href="#">3984</a>  | 252 - 262   | 645.8576  | 1289.7006 | 1289.7013 | -0.53   | 1 | 43    | 0.001   | 1    | U | K.LDKDIVALMTR.R<br>+ Oxidation (M)      |
| <a href="#">3985</a>  | 252 - 262   | 430.9075  | 1289.7006 | 1289.7013 | -0.52   | 1 | 29    | 0.015   | 1    | U | K.LDKDIVALMTR.R<br>+ Oxidation (M)      |
| <a href="#">3986</a>  | 252 - 262   | 430.9075  | 1289.7007 | 1289.7013 | -0.47   | 1 | 45    | 0.00056 | 1    | U | K.LDKDIVALMTR.R<br>+ Oxidation (M)      |
| <a href="#">3988</a>  | 252 - 262   | 430.9076  | 1289.7010 | 1289.7013 | -0.24   | 1 | 41    | 0.0037  | 1    | U | K.LDKDIVALMTR.R<br>+ Oxidation (M)      |
| <a href="#">3989</a>  | 252 - 262   | 430.9076  | 1289.7010 | 1289.7013 | -0.24   | 1 | 37    | 0.0019  | 1    | U | K.LDKDIVALMTR.R<br>+ Oxidation (M)      |
| <a href="#">3990</a>  | 252 - 262   | 645.8578  | 1289.7011 | 1289.7013 | -0.17   | 1 | 43    | 0.0006  | 1    | U | K.LDKDIVALMTR.R<br>+ Oxidation (M)      |
| <a href="#">3991</a>  | 252 - 262   | 430.9076  | 1289.7011 | 1289.7013 | -0.14   | 1 | 39    | 0.0038  | 1    | U | K.LDKDIVALMTR.R<br>+ Oxidation (M)      |
| <a href="#">3992</a>  | 252 - 262   | 645.8578  | 1289.7011 | 1289.7013 | -0.14   | 1 | 65    | 1e-05   | 1    | U | K.LDKDIVALMTR.R<br>+ Oxidation (M)      |
| <a href="#">3993</a>  | 252 - 262   | 430.9077  | 1289.7012 | 1289.7013 | -0.098  | 1 | 29    | 0.022   | 1    | U | K.LDKDIVALMTR.R<br>+ Oxidation (M)      |
| <a href="#">3994</a>  | 252 - 262   | 430.9077  | 1289.7012 | 1289.7013 | -0.075  | 1 | 30    | 0.012   | 1    | U | K.LDKDIVALMTR.R<br>+ Oxidation (M)      |
| <a href="#">3995</a>  | 252 - 262   | 645.8579  | 1289.7013 | 1289.7013 | -0.032  | 1 | 58    | 8.9e-06 | 1    | U | K.LDKDIVALMTR.R                         |

| Query                 | Start - End | Observed | Mr (expt) | Mr (calc)   | ppm     | M | Score | Expect  | Rank | U | Peptide                            |
|-----------------------|-------------|----------|-----------|-------------|---------|---|-------|---------|------|---|------------------------------------|
| <a href="#">3996</a>  | 252 - 262   | 645.8580 | 1289.7014 | 1289.7013   | 0.077   | 1 | 57    | 2.5e-05 | 1    | U | + Oxidation (M)<br>K.LDKDIVALMTR.R |
| <a href="#">988</a>   | 255 - 262   | 459.7574 | 917.5003  | 917.5004    | -0.086  | 0 | 42    | 0.0016  | 1    | U | K.DIVALMTR.R                       |
| <a href="#">1089</a>  | 255 - 262   | 467.7547 | 933.4948  | 933.4953    | -0.55   | 0 | 31    | 0.043   | 1    | U | + Oxidation (M)<br>K.DIVALMTR.R    |
| <a href="#">1090</a>  | 255 - 262   | 467.7548 | 933.4950  | 933.4953    | -0.40   | 0 | 31    | 0.042   | 1    | U | + Oxidation (M)<br>K.DIVALMTR.R    |
| <a href="#">1093</a>  | 255 - 262   | 467.7552 | 933.4958  | 933.4953    | 0.49    | 0 | 32    | 0.034   | 1    | U | + Oxidation (M)<br>K.DIVALMTR.R    |
| <a href="#">2994</a>  | 263 - 272   | 584.7797 | 1167.5449 | 1167.5455   | -0.48   | 1 | 41    | 0.0007  | 1    | U | R.RAYDLAGSCR.G                     |
| <a href="#">1596</a>  | 264 - 272   | 506.7296 | 1011.4446 | 1011.4444   | 0.24    | 0 | 59    | 1.4e-05 | 1    | U | R.AYDLAGSCR.G                      |
| <a href="#">1419</a>  | 290 - 297   | 493.7634 | 985.5122  | 985.5120    | 0.13    | 0 | 29    | 0.01    | 1    | U | R.SYVDLYVK.D                       |
| <a href="#">1420</a>  | 290 - 297   | 493.7634 | 985.5123  | 985.5120    | 0.25    | 0 | 27    | 0.018   | 1    | U | R.SYVDLYVK.D                       |
| <a href="#">1421</a>  | 290 - 297   | 493.7637 | 985.5128  | 985.5120    | 0.80    | 0 | 43    | 0.0006  | 1    | U | R.SYVDLYVK.D                       |
| <a href="#">3440</a>  | 290 - 299   | 615.3242 | 1228.6338 | 1228.6339   | -0.13   | 1 | 20    | 0.041   | 1    | U | R.SYVDLYVKDK.L                     |
| <a href="#">3143</a>  | 298 - 308   | 594.8268 | 1187.6391 | 1187.6398   | -0.56   | 1 | 50    | 0.00032 | 1    | U | K.DKLDLDTGVALK.V                   |
| <a href="#">3144</a>  | 298 - 308   | 594.8268 | 1187.6391 | 1187.6398   | -0.51   | 1 | 44    | 0.003   | 1    | U | K.DKLDLDTGVALK.V                   |
| <a href="#">3146</a>  | 298 - 308   | 594.8270 | 1187.6395 | 1187.6398   | -0.17   | 1 | 27    | 0.025   | 1    | U | K.DKLDLDTGVALK.V                   |
| <a href="#">10560</a> | 298 - 317   | 563.3082 | 2249.2038 | 2249.2015   | 1.00    | 2 | 24    | 0.026   | 1    | U | K.DKLDLDTGVALKVIHELANER.W          |
| <a href="#">1154</a>  | 300 - 308   | 473.2664 | 944.5183  | 944.5179    | 0.46    | 0 | 51    | 0.00026 | 1    | U | K.LDLETGVALK.V                     |
| <a href="#">2158</a>  | 309 - 317   | 540.7923 | 1079.5700 | 1079.5723   | -2.19   | 0 | 39    | 0.0027  | 1    | U | K.VIHELANER.W                      |
| <a href="#">2159</a>  | 309 - 317   | 360.8641 | 1079.5704 | 1079.5723   | -1.75   | 0 | 25    | 0.028   | 1    | U | K.VIHELANER.W                      |
| <a href="#">2162</a>  | 309 - 317   | 360.8646 | 1079.5721 | 1079.5723   | -0.25   | 0 | 29    | 0.0075  | 1    | U | K.VIHELANER.W                      |
| <a href="#">2163</a>  | 309 - 317   | 540.7933 | 1079.5721 | 1079.5723   | -0.24   | 0 | 26    | 0.018   | 1    | U | K.VIHELANER.W                      |
| <a href="#">2164</a>  | 309 - 317   | 540.7933 | 1079.5721 | 1079.5723   | -0.22   | 0 | 30    | 0.027   | 1    | U | K.VIHELANER.W                      |
| <a href="#">2165</a>  | 309 - 317   | 360.8647 | 1079.5722 | 1079.5723   | -0.16   | 0 | 20    | 0.032   | 1    | U | K.VIHELANER.W                      |
| <a href="#">2167</a>  | 309 - 317   | 360.8647 | 1079.5723 | 1079.5723   | 0.0046  | 0 | 29    | 0.013   | 1    | U | K.VIHELANER.W                      |
| <a href="#">2168</a>  | 309 - 317   | 540.7934 | 1079.5723 | 1079.5723   | 0.019   | 0 | 25    | 0.023   | 1    | U | K.VIHELANER.W                      |
| <a href="#">2169</a>  | 309 - 317   | 540.7935 | 1079.5724 | 1079.5723   | 0.094   | 0 | 34    | 0.0023  | 1    | U | K.VIHELANER.W                      |
| <a href="#">2172</a>  | 309 - 317   | 360.8648 | 1079.5725 | 1079.5723   | 0.20    | 0 | 30    | 0.014   | 1    | U | K.VIHELANER.W                      |
| <a href="#">2173</a>  | 309 - 317   | 540.7936 | 1079.5726 | 1079.5723   | 0.22    | 0 | 51    | 0.00035 | 1    | U | K.VIHELANER.W                      |
| <a href="#">2174</a>  | 309 - 317   | 360.8648 | 1079.5726 | 1079.5723   | 0.23    | 0 | 44    | 0.0018  | 1    | U | K.VIHELANER.W                      |
| <a href="#">2175</a>  | 309 - 317   | 540.7937 | 1079.5728 | 1079.5723   | 0.41    | 0 | 28    | 0.035   | 1    | U | K.VIHELANER.W                      |
| <a href="#">2176</a>  | 309 - 317   | 360.8649 | 1079.5729 | 1079.5723   | 0.56    | 0 | 34    | 0.018   | 1    | U | K.VIHELANER.W                      |
| <a href="#">3624</a>  | 318 - 327   | 625.8079 | 1249.6012 | 1249.6013   | -0.052  | 0 | 57    | 1.8e-05 | 1    | U | R.WDVCLTLSEK.G                     |
| <a href="#">7018</a>  | 328 - 342   | 820.9341 | 1639.8536 | 1639.8570   | -2.03   | 0 | 60    | 3.5e-05 | 1    | U | K.GFQQISFVNSIATTK.G                |
| <a href="#">7019</a>  | 328 - 342   | 820.9342 | 1639.8539 | 1639.8570   | -1.87   | 0 | 38    | 0.00083 | 1    | U | K.GFQQISFVNSIATTK.G                |
| <a href="#">7020</a>  | 328 - 342   | 820.9343 | 1639.8540 | 1639.8570   | -1.81   | 0 | 38    | 0.00048 | 1    | U | K.GFQQISFVNSIATTK.G                |
| <a href="#">7021</a>  | 328 - 342   | 820.9345 | 1639.8544 | 1639.8570   | -1.57   | 0 | 38    | 0.00027 | 1    | U | K.GFQQISFVNSIATTK.G                |
| <a href="#">7022</a>  | 328 - 342   | 820.9347 | 1639.8548 | 1639.8570   | -1.35   | 0 | 43    | 0.00019 | 1    | U | K.GFQQISFVNSIATTK.G                |
| <a href="#">7023</a>  | 328 - 342   | 820.9347 | 1639.8548 | 1639.8570   | -1.34   | 0 | 51    | 2.1e-05 | 1    | U | K.GFQQISFVNSIATTK.G                |
| <a href="#">7024</a>  | 328 - 342   | 820.9349 | 1639.8553 | 1639.8570   | -1.04   | 0 | 61    | 6.6e-06 | 1    | U | K.GFQQISFVNSIATTK.G                |
| <a href="#">7026</a>  | 328 - 342   | 820.9353 | 1639.8560 | 1639.8570   | -0.59   | 0 | 53    | 9.7e-05 | 1    | U | K.GFQQISFVNSIATTK.G                |
| <a href="#">7027</a>  | 328 - 342   | 820.9353 | 1639.8561 | 1639.8570   | -0.53   | 0 | 43    | 0.0012  | 1    | U | K.GFQQISFVNSIATTK.G                |
| <a href="#">7028</a>  | 328 - 342   | 820.9353 | 1639.8561 | 1639.8570   | -0.52   | 0 | 67    | 1.1e-05 | 1    | U | K.GFQQISFVNSIATTK.G                |
| <a href="#">7029</a>  | 328 - 342   | 820.9354 | 1639.8563 | 1639.8570   | -0.41   | 0 | 28    | 0.0032  | 1    | U | K.GFQQISFVNSIATTK.G                |
| <a href="#">7030</a>  | 328 - 342   | 820.9355 | 1639.8565 | 1639.8570   | -0.30   | 0 | 39    | 0.01    | 1    | U | K.GFQQISFVNSIATTK.G                |
| <a href="#">7031</a>  | 328 - 342   | 547.6261 | 1639.8565 | 1639.8570   | -0.29   | 0 | 48    | 0.00021 | 1    | U | K.GFQQISFVNSIATTK.G                |
| <a href="#">7032</a>  | 328 - 342   | 820.9356 | 1639.8565 | 1639.8570   | -0.26   | 0 | 49    | 0.00067 | 1    | U | K.GFQQISFVNSIATTK.G                |
| <a href="#">7033</a>  | 328 - 342   | 820.9356 | 1639.8566 | 1639.8570   | -0.23   | 0 | 33    | 0.0028  | 1    | U | K.GFQQISFVNSIATTK.G                |
| <a href="#">7035</a>  | 328 - 342   | 820.9356 | 1639.8567 | 1639.8570   | -0.14   | 0 | 24    | 0.0057  | 1    | U | K.GFQQISFVNSIATTK.G                |
| <a href="#">7036</a>  | 328 - 342   | 820.9357 | 1639.8568 | 1639.8570   | -0.10   | 0 | 58    | 2.1e-05 | 1    | U | K.GFQQISFVNSIATTK.G                |
| <a href="#">7037</a>  | 328 - 342   | 820.9357 | 1639.8568 | 1639.8570   | -0.080  | 0 | 58    | 1.2e-05 | 1    | U | K.GFQQISFVNSIATTK.G                |
| <a href="#">7038</a>  | 328 - 342   | 820.9357 | 1639.8569 | 1639.8570   | -0.043  | 0 | 27    | 0.0039  | 1    | U | K.GFQQISFVNSIATTK.G                |
| <a href="#">7039</a>  | 328 - 342   | 820.9357 | 1639.8569 | 1639.8570   | -0.031  | 0 | 42    | 0.0015  | 1    | U | K.GFQQISFVNSIATTK.G                |
| <a href="#">7040</a>  | 328 - 342   | 547.6263 | 1639.8570 | 1639.8570   | -0.016  | 0 | 26    | 0.026   | 1    | U | K.GFQQISFVNSIATTK.G                |
| <a href="#">7041</a>  | 328 - 342   | 820.9358 | 1639.8570 | 1639.8570   | -0.0067 | 0 | 61    | 1.4e-05 | 1    | U | K.GFQQISFVNSIATTK.G                |
| <a href="#">7042</a>  | 328 - 342   | 547.6263 | 1639.8570 | 1639.8570   | 0.0018  | 0 | 23    | 0.024   | 1    | U | K.GFQQISFVNSIATTK.G                |
| <a href="#">7043</a>  | 328 - 342   | 547.6263 | 1639.8570 | 1639.8570   | 0.020   | 0 | 44    | 0.0002  | 1    | U | K.GFQQISFVNSIATTK.G                |
| <a href="#">7044</a>  | 328 - 342   | 820.9358 | 1639.8571 | 1639.8570   | 0.066   | 0 | 45    | 0.0023  | 1    | U | K.GFQQISFVNSIATTK.G                |
| <a href="#">7045</a>  | 328 - 342   | 820.9358 | 1639.8571 | 1639.8570   | 0.079   | 0 | 22    | 0.048   | 1    | U | K.GFQQISFVNSIATTK.G                |
| <a href="#">7046</a>  | 328 - 342   | 820.9360 | 1639.8575 | 1639.8570   | 0.30    | 0 | 39    | 0.0069  | 1    | U | K.GFQQISFVNSIATTK.G                |
| <a href="#">7047</a>  | 328 - 342   | 820.9361 | 1639.8576 | 1639.8570   | 0.40    | 0 | 78    | 1.1e-06 | 1    | U | K.GFQQISFVNSIATTK.G                |
| <a href="#">7048</a>  | 328 - 342   | 820.9361 | 1639.8577 | 1639.8570   | 0.43    | 0 | 50    | 0.00029 | 1    | U | K.GFQQISFVNSIATTK.G                |
| <a href="#">7049</a>  | 328 - 342   | 820.9362 | 1639.8578 | 1639.8570   | 0.52    | 0 | 52    | 4.2e-05 | 1    | U | K.GFQQISFVNSIATTK.G                |
| <a href="#">7050</a>  | 328 - 342   | 547.6266 | 1639.8579 | 1639.8570   | 0.53    | 0 | 39    | 0.00028 | 1    | U | K.GFQQISFVNSIATTK.G                |
| <a href="#">7051</a>  | 328 - 342   | 820.9363 | 1639.8581 | 1639.8570   | 0.66    | 0 | 47    | 0.0002  | 1    | U | K.GFQQISFVNSIATTK.G                |
| <a href="#">7054</a>  | 328 - 342   | 547.6267 | 1639.8583 | 1639.8570   | 0.79    | 0 | 31    | 0.003   | 1    | U | K.GFQQISFVNSIATTK.G                |
| <a href="#">7056</a>  | 328 - 342   | 820.9366 | 1639.8587 | 1639.8570   | 1.07    | 0 | 31    | 0.0071  | 1    | U | K.GFQQISFVNSIATTK.G                |
| <a href="#">7057</a>  | 328 - 342   | 820.9369 | 1639.8592 | 1639.8570   | 1.33    | 0 | 17    | 0.025   | 1    | U | K.GFQQISFVNSIATTK.G                |
| <a href="#">4486</a>  | 346 - 357   | 679.3587 | 1356.7028 | 1356.7038   | -0.74   | 0 | 52    | 5.1e-05 | 1    | U | R.HVDYVVDQVVGK.L                   |
| <a href="#">4487</a>  | 346 - 357   | 679.3587 | 1356.7029 | 1356.7038   | -0.67   | 0 | 79    | 8.5e-08 | 1    | U | R.HVDYVVDQVVGK.L                   |
| <a href="#">4488</a>  | 346 - 357   | 679.3588 | 1356.7030 | 1356.7038   | -0.55   | 0 | 44    | 6.9e-05 | 1    | U | R.HVDYVVDQVVGK.L                   |
| <a href="#">4489</a>  | 346 - 357   | 679.3588 | 1356.7031 | 1356.7038   | -0.51   | 0 | 32    | 0.0023  | 1    | U | R.HVDYVVDQVVGK.L                   |
| <a href="#">4491</a>  | 346 - 357   | 679.3590 | 1356.7034 | 1356.7038   | -0.30   | 0 | 80    | 1.2e-07 | 1    | U | R.HVDYVVDQVVGK.L                   |
| <a href="#">4492</a>  | 346 - 357   | 679.3591 | 1356.7036 | 1356.7038   | -0.14   | 0 | 52    | 4.8e-05 | 1    | U | R.HVDYVVDQVVGK.L                   |
| <a href="#">4493</a>  | 346 - 357   | 679.3591 | 1356.7037 | 1356.7038   | -0.080  | 0 | 79    | 8.7e-08 | 1    | U | R.HVDYVVDQVVGK.L                   |
| <a href="#">4494</a>  | 346 - 357   | 679.3591 | 1356.7037 | 1356.7038   | -0.065  | 0 | 49    | 7.2e-05 | 1    | U | R.HVDYVVDQVVGK.L                   |
| <a href="#">4495</a>  | 346 - 357   | 679.3592 | 1356.7038 | 1356.7038   | 0.0088  | 0 | 76    | 2.4e-07 | 1    | U | R.HVDYVVDQVVGK.L                   |
| <a href="#">4496</a>  | 346 - 357   | 679.3592 | 1356.7038 | 1356.7038   | 0.0088  | 0 | 60    | 3.6e-06 | 1    | U | R.HVDYVVDQVVGK.L                   |
| <a href="#">4498</a>  | 346 - 357   | 679.3593 | 1356.7041 | 1356.7038   | 0.24    | 0 | 47    | 8.1e-05 | 1    | U | R.HVDYVVDQVVGK.L                   |
| <a href="#">4500</a>  | 346 - 357   | 453.2421 | 1356.7044 | 1356.7038   | 0.45    | 0 | 34    | 0.024   | 1    | U | R.HVDYVVDQVVGK.L                   |
| <a href="#">4502</a>  | 346 - 357   | 679.3596 | 1356.7046 | 1356.7038   | 0.57    | 0 | 72    | 3.9e-07 | 1    | U | R.HVDYVVDQVVGK.L                   |
| <a href="#">4503</a>  | 346 - 357   | 679.3596 | 1356.7046 | 1356.7038   | 0.57    | 0 | 58    | 5.6e-06 | 1    | U | R.HVDYVVDQVVGK.L                   |
| <a href="#">4504</a>  | 346 - 357   | 679.3601 | 1356.7057 | 1356.7038   | 1.42    | 0 | 75    | 1.2e-07 | 1    | U | R.HVDYVVDQVVGK.L                   |
| <a href="#">521</a>   | 358 - 364   | 414.7815 | 827.5484  | 827.5480    | 0.47    | 1 | 26    | 0.018   | 1    | U | K.LIEVKK.K                         |
| <a href="#">2916</a>  | 368 - 378   | 387.2320 | 1158.6743 | 1158.6761   | -1.54   | 0 | 43    | 0.0011  | 1    | U | K.AGVSVKPFQVK.N                    |
| <a href="#">2917</a>  | 368 - 378   | 580.3448 | 1158.6750 | 1158.6761</ |         |   |       |         |      |   |                                    |

| Query                 | Start - End | Observed | Mr (expt) | Mr (calc) | ppm    | M | Score | Expect  | Rank | U | Peptide                            |
|-----------------------|-------------|----------|-----------|-----------|--------|---|-------|---------|------|---|------------------------------------|
| <a href="#">2928</a>  | 368 - 378   | 387.2329 | 1158.6769 | 1158.6761 | 0.66   | 0 | 27    | 0.0095  | 1    | U | K.AGVSVKPPFQVK.N                   |
| <a href="#">2932</a>  | 368 - 378   | 580.3465 | 1158.6784 | 1158.6761 | 2.01   | 0 | 23    | 0.05    | 1    | U | K.AGVSVKPPFQVK.N                   |
| <a href="#">11429</a> | 379 - 399   | 859.4247 | 2575.2522 | 2575.2529 | -0.27  | 0 | 63    | 4e-05   | 1    | U | K.NHIWVFINCLIENPTFDSQTK.E          |
| <a href="#">11430</a> | 379 - 399   | 859.4248 | 2575.2526 | 2575.2529 | -0.13  | 0 | 58    | 0.00026 | 1    | U | K.NHIWVFINCLIENPTFDSQTK.E          |
| <a href="#">2136</a>  | 438 - 446   | 539.3060 | 1076.5974 | 1076.5978 | -0.39  | 1 | 26    | 0.018   | 1    | U | K.FKAQQLNKK.K                      |
| <a href="#">406</a>   | 440 - 446   | 401.7242 | 801.4339  | 801.4344  | -0.67  | 0 | 32    | 0.03    | 1    | U | K.AQTQLNKK.K                       |
| <a href="#">410</a>   | 440 - 446   | 401.7252 | 801.4359  | 801.4344  | 1.80   | 0 | 36    | 0.01    | 1    | U | K.AQTQLNKK.K                       |
| <a href="#">1061</a>  | 440 - 447   | 465.7718 | 929.5291  | 929.5294  | -0.30  | 1 | 32    | 0.0096  | 1    | U | K.AQTQLNKK.C                       |
| <a href="#">1337</a>  | 462 - 471   | 488.2224 | 974.4301  | 974.4305  | -0.36  | 0 | 59    | 5.6e-05 | 1    | U | K.LDDANDAGGK.H                     |
| <a href="#">1338</a>  | 462 - 471   | 488.2224 | 974.4303  | 974.4305  | -0.17  | 0 | 65    | 1.6e-05 | 1    | U | K.LDDANDAGGK.H                     |
| <a href="#">1339</a>  | 462 - 471   | 488.2226 | 974.4306  | 974.4305  | 0.11   | 0 | 65    | 1.3e-05 | 1    | U | K.LDDANDAGGK.H                     |
| <a href="#">1340</a>  | 462 - 471   | 488.2228 | 974.4311  | 974.4305  | 0.63   | 0 | 36    | 0.0029  | 1    | U | K.LDDANDAGGK.H                     |
| <a href="#">1341</a>  | 462 - 471   | 488.2230 | 974.4314  | 974.4305  | 0.94   | 0 | 26    | 0.026   | 1    | U | K.LDDANDAGGK.H                     |
| <a href="#">1342</a>  | 462 - 471   | 488.2236 | 974.4326  | 974.4305  | 2.17   | 0 | 34    | 0.0037  | 1    | U | K.LDDANDAGGK.H                     |
| <a href="#">8179</a>  | 472 - 487   | 887.4379 | 1772.8613 | 1772.8614 | -0.069 | 0 | 97    | 8.9e-09 | 1    | U | K.HSLECTLILTEGDSAK.S               |
| <a href="#">8180</a>  | 472 - 487   | 591.9612 | 1772.8616 | 1772.8614 | 0.097  | 0 | 31    | 0.016   | 1    | U | K.HSLECTLILTEGDSAK.S               |
| <a href="#">2601</a>  | 488 - 499   | 564.8399 | 1127.6653 | 1127.6663 | -0.88  | 0 | 33    | 0.0034  | 1    | U | K.SLAVSGLGVIGR.D                   |
| <a href="#">2602</a>  | 488 - 499   | 564.8400 | 1127.6653 | 1127.6663 | -0.81  | 0 | 48    | 0.00011 | 1    | U | K.SLAVSGLGVIGR.D                   |
| <a href="#">2603</a>  | 488 - 499   | 564.8401 | 1127.6656 | 1127.6663 | -0.56  | 0 | 60    | 3.2e-05 | 1    | U | K.SLAVSGLGVIGR.D                   |
| <a href="#">2604</a>  | 488 - 499   | 564.8401 | 1127.6657 | 1127.6663 | -0.49  | 0 | 69    | 9.1e-07 | 1    | U | K.SLAVSGLGVIGR.D                   |
| <a href="#">2605</a>  | 488 - 499   | 564.8402 | 1127.6658 | 1127.6663 | -0.44  | 0 | 67    | 8.3e-06 | 1    | U | K.SLAVSGLGVIGR.D                   |
| <a href="#">2606</a>  | 488 - 499   | 564.8402 | 1127.6658 | 1127.6663 | -0.40  | 0 | 54    | 0.00013 | 1    | U | K.SLAVSGLGVIGR.D                   |
| <a href="#">2608</a>  | 488 - 499   | 564.8402 | 1127.6659 | 1127.6663 | -0.33  | 0 | 50    | 0.00014 | 1    | U | K.SLAVSGLGVIGR.D                   |
| <a href="#">2609</a>  | 488 - 499   | 564.8403 | 1127.6660 | 1127.6663 | -0.21  | 0 | 35    | 0.00053 | 1    | U | K.SLAVSGLGVIGR.D                   |
| <a href="#">2610</a>  | 488 - 499   | 564.8403 | 1127.6661 | 1127.6663 | -0.13  | 0 | 69    | 1.8e-06 | 1    | U | K.SLAVSGLGVIGR.D                   |
| <a href="#">2611</a>  | 488 - 499   | 564.8403 | 1127.6661 | 1127.6663 | -0.12  | 0 | 65    | 3.7e-06 | 1    | U | K.SLAVSGLGVIGR.D                   |
| <a href="#">2612</a>  | 488 - 499   | 564.8404 | 1127.6663 | 1127.6663 | 0.025  | 0 | 45    | 0.00024 | 1    | U | K.SLAVSGLGVIGR.D                   |
| <a href="#">2613</a>  | 488 - 499   | 564.8404 | 1127.6663 | 1127.6663 | 0.025  | 0 | 67    | 6.7e-06 | 1    | U | K.SLAVSGLGVIGR.D                   |
| <a href="#">2614</a>  | 488 - 499   | 376.8960 | 1127.6663 | 1127.6663 | 0.028  | 0 | 46    | 0.00091 | 1    | U | K.SLAVSGLGVIGR.D                   |
| <a href="#">2615</a>  | 488 - 499   | 564.8404 | 1127.6663 | 1127.6663 | 0.043  | 0 | 65    | 4.4e-06 | 1    | U | K.SLAVSGLGVIGR.D                   |
| <a href="#">2616</a>  | 488 - 499   | 564.8406 | 1127.6666 | 1127.6663 | 0.27   | 0 | 53    | 5.2e-05 | 1    | U | K.SLAVSGLGVIGR.D                   |
| <a href="#">2617</a>  | 488 - 499   | 564.8406 | 1127.6667 | 1127.6663 | 0.36   | 0 | 62    | 5.7e-06 | 1    | U | K.SLAVSGLGVIGR.D                   |
| <a href="#">2618</a>  | 488 - 499   | 564.8406 | 1127.6667 | 1127.6663 | 0.43   | 0 | 57    | 1.7e-05 | 1    | U | K.SLAVSGLGVIGR.D                   |
| <a href="#">2619</a>  | 488 - 499   | 564.8408 | 1127.6669 | 1127.6663 | 0.61   | 0 | 41    | 0.00021 | 1    | U | K.SLAVSGLGVIGR.D                   |
| <a href="#">2620</a>  | 488 - 499   | 564.8410 | 1127.6675 | 1127.6663 | 1.09   | 0 | 29    | 0.0018  | 1    | U | K.SLAVSGLGVIGR.D                   |
| <a href="#">2621</a>  | 488 - 499   | 564.8411 | 1127.6677 | 1127.6663 | 1.30   | 0 | 40    | 0.00088 | 1    | U | K.SLAVSGLGVIGR.D                   |
| <a href="#">2547</a>  | 500 - 508   | 561.8068 | 1121.5990 | 1121.5982 | 0.76   | 1 | 32    | 0.038   | 1    | U | R.DRYGVFPLR.G                      |
| <a href="#">641</a>   | 502 - 508   | 426.2422 | 850.4698  | 850.4701  | -0.39  | 0 | 35    | 0.0097  | 1    | R | YGVFPLR.G                          |
| <a href="#">645</a>   | 502 - 508   | 426.2423 | 850.4700  | 850.4701  | -0.16  | 0 | 30    | 0.01    | 1    | R | YGVFPLR.G                          |
| <a href="#">646</a>   | 502 - 508   | 426.2425 | 850.4704  | 850.4701  | 0.38   | 0 | 19    | 0.037   | 1    | R | YGVFPLR.G                          |
| <a href="#">647</a>   | 502 - 508   | 426.2425 | 850.4705  | 850.4701  | 0.48   | 0 | 19    | 0.047   | 1    | R | YGVFPLR.G                          |
| <a href="#">6010</a>  | 521 - 533   | 765.4036 | 1528.7926 | 1528.7919 | 0.51   | 0 | 90    | 7.5e-08 | 1    | K | QIMENAEINNIK.I                     |
| <a href="#">6011</a>  | 521 - 533   | 510.6049 | 1528.7928 | 1528.7919 | 0.64   | 0 | 47    | 0.0016  | 1    | K | QIMENAEINNIK.I                     |
| <a href="#">6209</a>  | 521 - 533   | 773.4001 | 1544.7857 | 1544.7868 | -0.70  | 0 | 71    | 4.3e-06 | 1    | K | QIMENAEINNIK.I + Oxidation (M)     |
| <a href="#">6210</a>  | 521 - 533   | 773.4005 | 1544.7864 | 1544.7868 | -0.27  | 0 | 73    | 2.2e-06 | 1    | K | QIMENAEINNIK.I + Oxidation (M)     |
| <a href="#">6211</a>  | 521 - 533   | 773.4005 | 1544.7865 | 1544.7868 | -0.17  | 0 | 52    | 0.0001  | 1    | K | QIMENAEINNIK.I + Oxidation (M)     |
| <a href="#">6212</a>  | 521 - 533   | 773.4007 | 1544.7868 | 1544.7868 | 0.025  | 0 | 61    | 2.1e-05 | 1    | K | QIMENAEINNIK.I + Oxidation (M)     |
| <a href="#">6213</a>  | 521 - 533   | 773.4010 | 1544.7875 | 1544.7868 | 0.44   | 0 | 87    | 1.1e-07 | 1    | K | QIMENAEINNIK.I + Oxidation (M)     |
| <a href="#">477</a>   | 534 - 540   | 410.7499 | 819.4852  | 819.4854  | -0.22  | 0 | 20    | 0.032   | 1    | K | IVGLQYK.K                          |
| <a href="#">480</a>   | 534 - 540   | 410.7506 | 819.4866  | 819.4854  | 1.44   | 0 | 32    | 0.0072  | 1    | K | IVGLQYK.K                          |
| <a href="#">2880</a>  | 541 - 550   | 578.2797 | 1154.5449 | 1154.5455 | -0.55  | 1 | 31    | 0.0012  | 1    | U | K.KSYDDAESLK.T                     |
| <a href="#">2883</a>  | 541 - 550   | 578.2801 | 1154.5457 | 1154.5455 | 0.20   | 1 | 33    | 0.001   | 1    | U | K.KSYDDAESLK.T                     |
| <a href="#">2884</a>  | 541 - 550   | 578.2808 | 1154.5471 | 1154.5455 | 1.43   | 1 | 30    | 0.0067  | 1    | U | K.KSYDDAESLK.T                     |
| <a href="#">1713</a>  | 542 - 550   | 514.2323 | 1026.4501 | 1026.4505 | -0.43  | 0 | 19    | 0.026   | 1    | U | K.SYDDAESLK.T                      |
| <a href="#">1715</a>  | 542 - 550   | 514.2325 | 1026.4504 | 1026.4505 | -0.095 | 0 | 30    | 0.0035  | 1    | U | K.SYDDAESLK.T                      |
| <a href="#">1716</a>  | 542 - 550   | 514.2326 | 1026.4507 | 1026.4505 | 0.18   | 0 | 43    | 0.00022 | 1    | U | K.SYDDAESLK.T                      |
| <a href="#">1717</a>  | 542 - 550   | 514.2327 | 1026.4508 | 1026.4505 | 0.22   | 0 | 25    | 0.041   | 1    | U | K.SYDDAESLK.T                      |
| <a href="#">4773</a>  | 542 - 553   | 699.3488 | 1396.6830 | 1396.6834 | -0.29  | 1 | 55    | 1.4e-05 | 1    | U | K.SYDDAESLKTLR.Y                   |
| <a href="#">4774</a>  | 542 - 553   | 699.3490 | 1396.6833 | 1396.6834 | -0.034 | 1 | 48    | 9.1e-05 | 1    | U | K.SYDDAESLKTLR.Y                   |
| <a href="#">7798</a>  | 557 - 571   | 866.4054 | 1730.7963 | 1730.7968 | -0.28  | 0 | 53    | 7.9e-05 | 1    | K | IMIMTDQDQGSHIK.G                   |
| <a href="#">7800</a>  | 557 - 571   | 577.9395 | 1730.7968 | 1730.7968 | 0.023  | 0 | 31    | 0.013   | 1    | K | IMIMTDQDQGSHIK.G                   |
| <a href="#">7806</a>  | 557 - 571   | 866.4064 | 1730.7983 | 1730.7968 | 0.89   | 0 | 80    | 3.2e-07 | 1    | K | IMIMTDQDQGSHIK.G                   |
| <a href="#">7807</a>  | 557 - 571   | 866.4067 | 1730.7988 | 1730.7968 | 1.16   | 0 | 73    | 6e-06   | 1    | K | IMIMTDQDQGSHIK.G                   |
| <a href="#">7944</a>  | 557 - 571   | 874.4024 | 1746.7903 | 1746.7917 | -0.76  | 0 | 56    | 6.5e-05 | 1    | K | IMIMTDQDQGSHIK.G + Oxidation (M)   |
| <a href="#">7945</a>  | 557 - 571   | 583.2707 | 1746.7904 | 1746.7917 | -0.75  | 0 | 40    | 0.011   | 1    | K | IMIMTDQDQGSHIK.G + Oxidation (M)   |
| <a href="#">7948</a>  | 557 - 571   | 874.4028 | 1746.7911 | 1746.7917 | -0.33  | 0 | 77    | 2.2e-06 | 1    | K | IMIMTDQDQGSHIK.G + Oxidation (M)   |
| <a href="#">7949</a>  | 557 - 571   | 583.2710 | 1746.7911 | 1746.7917 | -0.32  | 0 | 47    | 0.0021  | 1    | K | IMIMTDQDQGSHIK.G + Oxidation (M)   |
| <a href="#">7950</a>  | 557 - 571   | 874.4030 | 1746.7913 | 1746.7917 | -0.19  | 0 | 57    | 3.7e-05 | 1    | K | IMIMTDQDQGSHIK.G + Oxidation (M)   |
| <a href="#">7951</a>  | 557 - 571   | 583.2711 | 1746.7914 | 1746.7917 | -0.17  | 0 | 41    | 0.0082  | 1    | K | IMIMTDQDQGSHIK.G + Oxidation (M)   |
| <a href="#">7952</a>  | 557 - 571   | 874.4030 | 1746.7914 | 1746.7917 | -0.14  | 0 | 82    | 1.7e-07 | 1    | K | IMIMTDQDQGSHIK.G + Oxidation (M)   |
| <a href="#">7953</a>  | 557 - 571   | 583.2711 | 1746.7916 | 1746.7917 | -0.063 | 0 | 42    | 0.0074  | 1    | K | IMIMTDQDQGSHIK.G + Oxidation (M)   |
| <a href="#">7954</a>  | 557 - 571   | 874.4031 | 1746.7916 | 1746.7917 | -0.060 | 0 | 79    | 1.3e-06 | 1    | K | IMIMTDQDQGSHIK.G + Oxidation (M)   |
| <a href="#">7956</a>  | 557 - 571   | 583.2712 | 1746.7916 | 1746.7917 | -0.029 | 0 | 36    | 0.027   | 1    | K | IMIMTDQDQGSHIK.G + Oxidation (M)   |
| <a href="#">7958</a>  | 557 - 571   | 583.2713 | 1746.7922 | 1746.7917 | 0.28   | 0 | 32    | 0.0045  | 1    | K | IMIMTDQDQGSHIK.G + Oxidation (M)   |
| <a href="#">7960</a>  | 557 - 571   | 583.2717 | 1746.7934 | 1746.7917 | 0.98   | 0 | 47    | 0.00092 | 1    | K | IMIMTDQDQGSHIK.G + Oxidation (M)   |
| <a href="#">8086</a>  | 557 - 571   | 588.6018 | 1762.7834 | 1762.7866 | -1.80  | 0 | 31    | 0.0053  | 1    | K | IMIMTDQDQGSHIK.G + 2 Oxidation (M) |

| Query                 | Start - End | Observed  | Mr (expt) | Mr (calc) | ppm     | M | Score | Expect  | Rank | U | Peptide                              |
|-----------------------|-------------|-----------|-----------|-----------|---------|---|-------|---------|------|---|--------------------------------------|
| <a href="#">8087</a>  | 557 - 571   | 588.6020  | 1762.7843 | 1762.7866 | -1.32   | 0 | 29    | 0.0091  | 1    |   | K.IMIMTDQDQGSHIK.G + 2 Oxidation (M) |
| <a href="#">8089</a>  | 557 - 571   | 882.3997  | 1762.7848 | 1762.7866 | -0.99   | 0 | 55    | 4.3e-05 | 1    |   | K.IMIMTDQDQGSHIK.G + 2 Oxidation (M) |
| <a href="#">8090</a>  | 557 - 571   | 588.6023  | 1762.7852 | 1762.7866 | -0.81   | 0 | 55    | 9.4e-05 | 1    |   | K.IMIMTDQDQGSHIK.G + 2 Oxidation (M) |
| <a href="#">8091</a>  | 557 - 571   | 882.3999  | 1762.7852 | 1762.7866 | -0.80   | 0 | 45    | 0.00042 | 1    |   | K.IMIMTDQDQGSHIK.G + 2 Oxidation (M) |
| <a href="#">8092</a>  | 557 - 571   | 588.6024  | 1762.7853 | 1762.7866 | -0.73   | 0 | 38    | 0.00091 | 1    |   | K.IMIMTDQDQGSHIK.G + 2 Oxidation (M) |
| <a href="#">8093</a>  | 557 - 571   | 882.4000  | 1762.7855 | 1762.7866 | -0.63   | 0 | 56    | 0.00026 | 1    |   | K.IMIMTDQDQGSHIK.G + 2 Oxidation (M) |
| <a href="#">8094</a>  | 557 - 571   | 588.6026  | 1762.7858 | 1762.7866 | -0.44   | 0 | 51    | 0.00021 | 1    |   | K.IMIMTDQDQGSHIK.G + 2 Oxidation (M) |
| <a href="#">8095</a>  | 557 - 571   | 882.4005  | 1762.7864 | 1762.7866 | -0.10   | 0 | 62    | 5.1e-05 | 1    |   | K.IMIMTDQDQGSHIK.G + 2 Oxidation (M) |
| <a href="#">8096</a>  | 557 - 571   | 882.4006  | 1762.7866 | 1762.7866 | -0.0017 | 0 | 71    | 7.2e-06 | 1    |   | K.IMIMTDQDQGSHIK.G + 2 Oxidation (M) |
| <a href="#">8097</a>  | 557 - 571   | 882.4006  | 1762.7867 | 1762.7866 | 0.044   | 0 | 67    | 1.2e-05 | 1    |   | K.IMIMTDQDQGSHIK.G + 2 Oxidation (M) |
| <a href="#">8098</a>  | 557 - 571   | 588.6028  | 1762.7867 | 1762.7866 | 0.074   | 0 | 58    | 6.3e-05 | 1    |   | K.IMIMTDQDQGSHIK.G + 2 Oxidation (M) |
| <a href="#">8099</a>  | 557 - 571   | 882.4007  | 1762.7868 | 1762.7866 | 0.12    | 0 | 60    | 0.00011 | 1    |   | K.IMIMTDQDQGSHIK.G + 2 Oxidation (M) |
| <a href="#">8101</a>  | 557 - 571   | 588.6029  | 1762.7870 | 1762.7866 | 0.21    | 0 | 39    | 0.0012  | 1    |   | K.IMIMTDQDQGSHIK.G + 2 Oxidation (M) |
| <a href="#">8102</a>  | 557 - 571   | 588.6030  | 1762.7870 | 1762.7866 | 0.24    | 0 | 22    | 0.015   | 1    |   | K.IMIMTDQDQGSHIK.G + 2 Oxidation (M) |
| <a href="#">8103</a>  | 557 - 571   | 882.4008  | 1762.7870 | 1762.7866 | 0.26    | 0 | 69    | 9.3e-06 | 1    |   | K.IMIMTDQDQGSHIK.G + 2 Oxidation (M) |
| <a href="#">8105</a>  | 557 - 571   | 588.6031  | 1762.7876 | 1762.7866 | 0.55    | 0 | 32    | 0.0054  | 1    |   | K.IMIMTDQDQGSHIK.G + 2 Oxidation (M) |
| <a href="#">8106</a>  | 557 - 571   | 588.6032  | 1762.7877 | 1762.7866 | 0.64    | 0 | 30    | 0.0069  | 1    |   | K.IMIMTDQDQGSHIK.G + 2 Oxidation (M) |
| <a href="#">9118</a>  | 572 - 587   | 634.6954  | 1901.0644 | 1901.0676 | -1.67   | 0 | 22    | 0.012   | 1    | U | K.GLLINFIHHNWPSLLK.H                 |
| <a href="#">9119</a>  | 572 - 587   | 951.5400  | 1901.0653 | 1901.0676 | -1.16   | 0 | 39    | 0.00024 | 1    | U | K.GLLINFIHHNWPSLLK.H                 |
| <a href="#">9123</a>  | 572 - 587   | 634.6964  | 1901.0673 | 1901.0676 | -0.14   | 0 | 19    | 0.025   | 1    | U | K.GLLINFIHHNWPSLLK.H                 |
| <a href="#">9125</a>  | 572 - 587   | 634.6964  | 1901.0673 | 1901.0676 | -0.11   | 0 | 25    | 0.033   | 1    | U | K.GLLINFIHHNWPSLLK.H                 |
| <a href="#">9126</a>  | 572 - 587   | 951.5410  | 1901.0674 | 1901.0676 | -0.065  | 0 | 38    | 0.00033 | 1    | U | K.GLLINFIHHNWPSLLK.H                 |
| <a href="#">9132</a>  | 572 - 587   | 634.6967  | 1901.0683 | 1901.0676 | 0.41    | 0 | 33    | 0.015   | 1    | U | K.GLLINFIHHNWPSLLK.H                 |
| <a href="#">9133</a>  | 572 - 587   | 634.6968  | 1901.0685 | 1901.0676 | 0.49    | 0 | 23    | 0.01    | 1    | U | K.GLLINFIHHNWPSLLK.H                 |
| <a href="#">6012</a>  | 588 - 600   | 510.6162  | 1528.8267 | 1528.8290 | -1.49   | 0 | 47    | 0.00018 | 1    | U | K.HGFLEEFITPIVK.A                    |
| <a href="#">6013</a>  | 588 - 600   | 765.4209  | 1528.8272 | 1528.8290 | -1.14   | 0 | 49    | 2.3e-05 | 1    | U | K.HGFLEEFITPIVK.A                    |
| <a href="#">6015</a>  | 588 - 600   | 765.4212  | 1528.8278 | 1528.8290 | -0.77   | 0 | 51    | 1.7e-05 | 1    | U | K.HGFLEEFITPIVK.A                    |
| <a href="#">6016</a>  | 588 - 600   | 510.6167  | 1528.8283 | 1528.8290 | -0.41   | 0 | 21    | 0.026   | 1    | U | K.HGFLEEFITPIVK.A                    |
| <a href="#">6017</a>  | 588 - 600   | 765.4215  | 1528.8284 | 1528.8290 | -0.34   | 0 | 72    | 2.7e-07 | 1    | U | K.HGFLEEFITPIVK.A                    |
| <a href="#">6018</a>  | 588 - 600   | 510.6168  | 1528.8285 | 1528.8290 | -0.28   | 0 | 40    | 0.0042  | 1    | U | K.HGFLEEFITPIVK.A                    |
| <a href="#">6019</a>  | 588 - 600   | 765.4216  | 1528.8286 | 1528.8290 | -0.26   | 0 | 29    | 0.023   | 1    | U | K.HGFLEEFITPIVK.A                    |
| <a href="#">6020</a>  | 588 - 600   | 510.6168  | 1528.8286 | 1528.8290 | -0.26   | 0 | 49    | 0.00015 | 1    | U | K.HGFLEEFITPIVK.A                    |
| <a href="#">6021</a>  | 588 - 600   | 765.4216  | 1528.8286 | 1528.8290 | -0.25   | 0 | 84    | 1.5e-08 | 1    | U | K.HGFLEEFITPIVK.A                    |
| <a href="#">6022</a>  | 588 - 600   | 510.6168  | 1528.8286 | 1528.8290 | -0.24   | 0 | 43    | 0.0013  | 1    | U | K.HGFLEEFITPIVK.A                    |
| <a href="#">6023</a>  | 588 - 600   | 510.6168  | 1528.8286 | 1528.8290 | -0.24   | 0 | 38    | 0.0054  | 1    | U | K.HGFLEEFITPIVK.A                    |
| <a href="#">6024</a>  | 588 - 600   | 765.4216  | 1528.8286 | 1528.8290 | -0.21   | 0 | 50    | 2.7e-05 | 1    | U | K.HGFLEEFITPIVK.A                    |
| <a href="#">6026</a>  | 588 - 600   | 765.4217  | 1528.8288 | 1528.8290 | -0.10   | 0 | 65    | 2.4e-06 | 1    | U | K.HGFLEEFITPIVK.A                    |
| <a href="#">6027</a>  | 588 - 600   | 765.4217  | 1528.8289 | 1528.8290 | -0.063  | 0 | 64    | 9.5e-07 | 1    | U | K.HGFLEEFITPIVK.A                    |
| <a href="#">6028</a>  | 588 - 600   | 510.6169  | 1528.8289 | 1528.8290 | -0.060  | 0 | 25    | 0.041   | 1    | U | K.HGFLEEFITPIVK.A                    |
| <a href="#">6029</a>  | 588 - 600   | 765.4217  | 1528.8289 | 1528.8290 | -0.037  | 0 | 51    | 0.00019 | 1    | U | K.HGFLEEFITPIVK.A                    |
| <a href="#">6030</a>  | 588 - 600   | 510.6170  | 1528.8290 | 1528.8290 | 0.038   | 0 | 45    | 0.001   | 1    | U | K.HGFLEEFITPIVK.A                    |
| <a href="#">6032</a>  | 588 - 600   | 510.6170  | 1528.8291 | 1528.8290 | 0.058   | 0 | 46    | 0.00031 | 1    | U | K.HGFLEEFITPIVK.A                    |
| <a href="#">6033</a>  | 588 - 600   | 765.4218  | 1528.8291 | 1528.8290 | 0.094   | 0 | 20    | 0.031   | 1    | U | K.HGFLEEFITPIVK.A                    |
| <a href="#">6034</a>  | 588 - 600   | 765.4218  | 1528.8291 | 1528.8290 | 0.094   | 0 | 61    | 4.4e-06 | 1    | U | K.HGFLEEFITPIVK.A                    |
| <a href="#">6035</a>  | 588 - 600   | 510.6170  | 1528.8291 | 1528.8290 | 0.12    | 0 | 49    | 0.00066 | 1    | U | K.HGFLEEFITPIVK.A                    |
| <a href="#">6037</a>  | 588 - 600   | 765.4219  | 1528.8292 | 1528.8290 | 0.13    | 0 | 82    | 2.6e-08 | 1    | U | K.HGFLEEFITPIVK.A                    |
| <a href="#">6038</a>  | 588 - 600   | 765.4219  | 1528.8292 | 1528.8290 | 0.19    | 0 | 87    | 8.4e-09 | 1    | U | K.HGFLEEFITPIVK.A                    |
| <a href="#">6039</a>  | 588 - 600   | 510.6170  | 1528.8293 | 1528.8290 | 0.19    | 0 | 36    | 0.011   | 1    | U | K.HGFLEEFITPIVK.A                    |
| <a href="#">6040</a>  | 588 - 600   | 765.4219  | 1528.8293 | 1528.8290 | 0.21    | 0 | 45    | 0.001   | 1    | U | K.HGFLEEFITPIVK.A                    |
| <a href="#">6041</a>  | 588 - 600   | 765.4219  | 1528.8293 | 1528.8290 | 0.23    | 0 | 87    | 1.4e-08 | 1    | U | K.HGFLEEFITPIVK.A                    |
| <a href="#">6042</a>  | 588 - 600   | 765.4219  | 1528.8293 | 1528.8290 | 0.23    | 0 | 87    | 2.8e-08 | 1    | U | K.HGFLEEFITPIVK.A                    |
| <a href="#">6043</a>  | 588 - 600   | 765.4220  | 1528.8294 | 1528.8290 | 0.28    | 0 | 72    | 2.6e-07 | 1    | U | K.HGFLEEFITPIVK.A                    |
| <a href="#">6044</a>  | 588 - 600   | 765.4220  | 1528.8294 | 1528.8290 | 0.29    | 0 | 27    | 0.012   | 1    | U | K.HGFLEEFITPIVK.A                    |
| <a href="#">6045</a>  | 588 - 600   | 765.4220  | 1528.8294 | 1528.8290 | 0.29    | 0 | 35    | 0.0005  | 1    | U | K.HGFLEEFITPIVK.A                    |
| <a href="#">6046</a>  | 588 - 600   | 510.6171  | 1528.8294 | 1528.8290 | 0.31    | 0 | 28    | 0.014   | 1    | U | K.HGFLEEFITPIVK.A                    |
| <a href="#">6047</a>  | 588 - 600   | 510.6171  | 1528.8295 | 1528.8290 | 0.33    | 0 | 36    | 0.0034  | 1    | U | K.HGFLEEFITPIVK.A                    |
| <a href="#">6049</a>  | 588 - 600   | 765.4220  | 1528.8295 | 1528.8290 | 0.38    | 0 | 28    | 0.01    | 1    | U | K.HGFLEEFITPIVK.A                    |
| <a href="#">6050</a>  | 588 - 600   | 765.4221  | 1528.8296 | 1528.8290 | 0.40    | 0 | 35    | 0.0019  | 1    | U | K.HGFLEEFITPIVK.A                    |
| <a href="#">6052</a>  | 588 - 600   | 510.6173  | 1528.8301 | 1528.8290 | 0.72    | 0 | 21    | 0.032   | 1    | U | K.HGFLEEFITPIVK.A                    |
| <a href="#">6053</a>  | 588 - 600   | 765.4225  | 1528.8304 | 1528.8290 | 0.97    | 0 | 56    | 5.2e-06 | 1    | U | K.HGFLEEFITPIVK.A                    |
| <a href="#">10220</a> | 604 - 620   | 1080.5165 | 2159.0184 | 2159.0211 | -1.25   | 1 | 96    | 1.3e-08 | 1    | U | K.NKQELSFYSIPEFDEWK.K                |
| <a href="#">10221</a> | 604 - 620   | 1080.5173 | 2159.0201 | 2159.0211 | -0.45   | 1 | 61    | 1.4e-05 | 1    | U | K.NKQELSFYSIPEFDEWK.K                |
| <a href="#">10222</a> | 604 - 620   | 720.6808  | 2159.0204 | 2159.0211 | -0.32   | 1 | 29    | 0.024   | 1    | U | K.NKQELSFYSIPEFDEWK.K                |
| <a href="#">10655</a> | 604 - 621   | 1144.5648 | 2287.1151 | 2287.1161 | -0.42   | 2 | 70    | 4.5e-07 | 1    | U | K.NKQELSFYSIPEFDEWKK.H               |
| <a href="#">10657</a> | 604 - 621   | 572.7863  | 2287.1161 | 2287.1161 | 0.034   | 2 | 29    | 0.045   | 1    | U | K.NKQELSFYSIPEFDEWKK.H               |
| <a href="#">10658</a> | 604 - 621   | 763.3795  | 2287.1167 | 2287.1161 | 0.28    | 2 | 53    | 0.00015 | 1    | U | K.NKQELSFYSIPEFDEWKK.H               |
| <a href="#">9254</a>  | 606 - 620   | 959.4488  | 1916.8830 | 1916.8832 | -0.13   | 0 | 55    | 6.1e-05 | 1    | U | K.QELSFYSIPEFDEWK.K                  |
| <a href="#">9791</a>  | 606 - 621   | 1023.4936 | 2044.9726 | 2044.9782 | -2.71   | 1 | 19    | 0.02    | 1    | U | K.QELSFYSIPEFDEWKK.H                 |
| <a href="#">9792</a>  | 606 - 621   | 682.6665  | 2044.9777 | 2044.9782 | -0.23   | 1 | 31    | 0.0059  | 1    | U | K.QELSFYSIPEFDEWKK.H                 |
| <a href="#">9793</a>  | 606 - 621   | 1023.4964 | 2044.9782 | 2044.9782 | 0.014   | 1 | 37    | 0.0014  | 1    | U | K.QELSFYSIPEFDEWKK.H                 |
| <a href="#">857</a>   | 621 - 627   | 448.7512  | 895.4877  | 895.4875  | 0.24    | 1 | 31    | 0.024   | 1    | U | K.KHIENQK.A                          |
| <a href="#">1973</a>  | 647 - 654   | 530.7231  | 1059.4316 | 1059.4331 | -1.39   | 0 | 24    | 0.006   | 1    | U | K.EYFADMER.H                         |
| <a href="#">1975</a>  | 647 - 654   | 530.7237  | 1059.4329 | 1059.4331 | -0.18   | 0 | 19    | 0.026   | 1    | U | K.EYFADMER.H                         |
| <a href="#">1976</a>  | 647 - 654   | 530.7239  | 1059.4332 | 1059.4331 | 0.12    | 0 | 19    | 0.035   | 1    | U | K.EYFADMER.H                         |
| <a href="#">1977</a>  | 647 - 654   | 530.7242  | 1059.4339 | 1059.4331 | 0.76    | 0 | 20    | 0.029   | 1    | U | K.EYFADMER.H                         |
| <a href="#">1978</a>  | 647 - 654   | 530.7246  | 1059.4347 | 1059.4331 | 1.48    | 0 | 30    | 0.0053  | 1    | U | K.EYFADMER.H                         |
| <a href="#">2122</a>  | 647 - 654   | 538.7210  | 1075.4275 | 1075.4280 | -0.53   | 0 | 18    | 0.034   | 1    | U | K.EYFADMER.H                         |



| Query                | Start - End | Observed | Mr (expt) | Mr (calc) | ppm    | M | Score | Expect  | Rank | U | Peptide                         |
|----------------------|-------------|----------|-----------|-----------|--------|---|-------|---------|------|---|---------------------------------|
| <a href="#">2126</a> | 647 - 654   | 538.7214 | 1075.4282 | 1075.4280 | 0.19   | 0 | 22    | 0.036   | 1    | U | + Oxidation (M)<br>K.EYFADMER.H |
| <a href="#">7237</a> | 661 - 676   | 834.9090 | 1667.8035 | 1667.8042 | -0.45  | 0 | 75    | 2.8e-07 | 1    | U | R.YAGPEDDAAITLAFSK.K            |
| <a href="#">7238</a> | 661 - 676   | 834.9090 | 1667.8035 | 1667.8042 | -0.44  | 0 | 52    | 1.9e-05 | 1    | U | R.YAGPEDDAAITLAFSK.K            |
| <a href="#">7239</a> | 661 - 676   | 834.9091 | 1667.8036 | 1667.8042 | -0.36  | 0 | 58    | 4e-06   | 1    | U | R.YAGPEDDAAITLAFSK.K            |
| <a href="#">7240</a> | 661 - 676   | 834.9091 | 1667.8037 | 1667.8042 | -0.32  | 0 | 58    | 4.8e-06 | 1    | U | R.YAGPEDDAAITLAFSK.K            |
| <a href="#">7241</a> | 661 - 676   | 834.9092 | 1667.8039 | 1667.8042 | -0.23  | 0 | 25    | 0.0054  | 1    | U | R.YAGPEDDAAITLAFSK.K            |
| <a href="#">7242</a> | 661 - 676   | 834.9092 | 1667.8039 | 1667.8042 | -0.19  | 0 | 84    | 7.5e-08 | 1    | U | R.YAGPEDDAAITLAFSK.K            |
| <a href="#">7243</a> | 661 - 676   | 834.9094 | 1667.8042 | 1667.8042 | -0.010 | 0 | 84    | 1.6e-08 | 1    | U | R.YAGPEDDAAITLAFSK.K            |
| <a href="#">7244</a> | 661 - 676   | 834.9094 | 1667.8042 | 1667.8042 | 0.0018 | 0 | 84    | 2.8e-08 | 1    | U | R.YAGPEDDAAITLAFSK.K            |
| <a href="#">7245</a> | 661 - 676   | 834.9094 | 1667.8043 | 1667.8042 | 0.014  | 0 | 69    | 8.8e-07 | 1    | U | R.YAGPEDDAAITLAFSK.K            |
| <a href="#">7247</a> | 661 - 676   | 834.9095 | 1667.8044 | 1667.8042 | 0.12   | 0 | 59    | 5e-06   | 1    | U | R.YAGPEDDAAITLAFSK.K            |
| <a href="#">7248</a> | 661 - 676   | 556.9421 | 1667.8046 | 1667.8042 | 0.21   | 0 | 48    | 0.00023 | 1    | U | R.YAGPEDDAAITLAFSK.K            |
| <a href="#">7249</a> | 661 - 676   | 834.9096 | 1667.8047 | 1667.8042 | 0.30   | 0 | 79    | 3.7e-08 | 1    | U | R.YAGPEDDAAITLAFSK.K            |
| <a href="#">7250</a> | 661 - 676   | 834.9097 | 1667.8048 | 1667.8042 | 0.33   | 0 | 91    | 4.4e-09 | 1    | U | R.YAGPEDDAAITLAFSK.K            |
| <a href="#">7251</a> | 661 - 676   | 834.9097 | 1667.8049 | 1667.8042 | 0.40   | 0 | 72    | 1.7e-07 | 1    | U | R.YAGPEDDAAITLAFSK.K            |
| <a href="#">7252</a> | 661 - 676   | 834.9097 | 1667.8049 | 1667.8042 | 0.41   | 0 | 63    | 1.8e-06 | 1    | U | R.YAGPEDDAAITLAFSK.K            |
| <a href="#">7253</a> | 661 - 676   | 834.9098 | 1667.8050 | 1667.8042 | 0.45   | 0 | 68    | 6e-07   | 1    | U | R.YAGPEDDAAITLAFSK.K            |
| <a href="#">7254</a> | 661 - 676   | 834.9098 | 1667.8050 | 1667.8042 | 0.45   | 0 | 74    | 2.4e-07 | 1    | U | R.YAGPEDDAAITLAFSK.K            |
| <a href="#">7255</a> | 661 - 676   | 834.9098 | 1667.8050 | 1667.8042 | 0.46   | 0 | 70    | 5.4e-07 | 1    | U | R.YAGPEDDAAITLAFSK.K            |
| <a href="#">7256</a> | 661 - 676   | 834.9098 | 1667.8050 | 1667.8042 | 0.48   | 0 | 54    | 1e-05   | 1    | U | R.YAGPEDDAAITLAFSK.K            |
| <a href="#">7257</a> | 661 - 676   | 834.9100 | 1667.8055 | 1667.8042 | 0.77   | 0 | 66    | 7.2e-07 | 1    | U | R.YAGPEDDAAITLAFSK.K            |
| <a href="#">7258</a> | 661 - 676   | 834.9114 | 1667.8082 | 1667.8042 | 2.35   | 0 | 72    | 6.2e-07 | 1    | U | R.YAGPEDDAAITLAFSK.K            |
| <a href="#">5348</a> | 683 - 693   | 490.2348 | 1467.6825 | 1467.6816 | 0.60   | 1 | 29    | 0.013   | 1    | R | KEWLTFMEDR.R                    |
| <a href="#">5476</a> | 683 - 693   | 495.5661 | 1483.6764 | 1483.6765 | -0.13  | 1 | 26    | 0.017   | 1    | R | KEWLTFMEDR.R<br>+ Oxidation (M) |
| <a href="#">5478</a> | 683 - 693   | 495.5662 | 1483.6768 | 1483.6765 | 0.15   | 1 | 26    | 0.011   | 1    | R | KEWLTFMEDR.R<br>+ Oxidation (M) |
| <a href="#">5479</a> | 683 - 693   | 742.8457 | 1483.6769 | 1483.6765 | 0.22   | 1 | 54    | 2.8e-05 | 1    | R | KEWLTFMEDR.R<br>+ Oxidation (M) |
| <a href="#">5480</a> | 683 - 693   | 495.5663 | 1483.6770 | 1483.6765 | 0.30   | 1 | 41    | 0.00074 | 1    | R | KEWLTFMEDR.R<br>+ Oxidation (M) |
| <a href="#">5481</a> | 683 - 693   | 495.5663 | 1483.6770 | 1483.6765 | 0.32   | 1 | 33    | 0.0028  | 1    | R | KEWLTFMEDR.R<br>+ Oxidation (M) |
| <a href="#">5482</a> | 683 - 693   | 742.8458 | 1483.6771 | 1483.6765 | 0.39   | 1 | 24    | 0.014   | 1    | R | KEWLTFMEDR.R<br>+ Oxidation (M) |
| <a href="#">5483</a> | 683 - 693   | 495.5663 | 1483.6771 | 1483.6765 | 0.40   | 1 | 31    | 0.016   | 1    | R | KEWLTFMEDR.R<br>+ Oxidation (M) |
| <a href="#">5484</a> | 683 - 693   | 742.8459 | 1483.6772 | 1483.6765 | 0.43   | 1 | 28    | 0.0076  | 1    | R | KEWLTFMEDR.R<br>+ Oxidation (M) |
| <a href="#">5485</a> | 683 - 693   | 742.8460 | 1483.6774 | 1483.6765 | 0.56   | 1 | 38    | 0.0014  | 1    | R | KEWLTFMEDR.R<br>+ Oxidation (M) |
| <a href="#">5486</a> | 683 - 693   | 742.8463 | 1483.6781 | 1483.6765 | 1.04   | 1 | 30    | 0.014   | 1    | R | KEWLTFMEDR.R<br>+ Oxidation (M) |
| <a href="#">5487</a> | 683 - 693   | 742.8469 | 1483.6793 | 1483.6765 | 1.88   | 1 | 23    | 0.016   | 1    | R | KEWLTFMEDR.R<br>+ Oxidation (M) |
| <a href="#">6924</a> | 683 - 694   | 812.8984 | 1623.7821 | 1623.7827 | -0.36  | 2 | 38    | 0.0036  | 1    | R | KEWLTFMEDRR.Q                   |
| <a href="#">4394</a> | 684 - 693   | 670.8006 | 1339.5866 | 1339.5867 | -0.016 | 0 | 39    | 0.00032 | 1    | K | EWLTFMEDR.R                     |
| <a href="#">4395</a> | 684 - 693   | 670.8007 | 1339.5868 | 1339.5867 | 0.10   | 0 | 49    | 0.00025 | 1    | K | EWLTFMEDR.R                     |
| <a href="#">4479</a> | 684 - 693   | 678.7978 | 1355.5811 | 1355.5816 | -0.33  | 0 | 33    | 0.0025  | 1    | K | EWLTFMEDR.R<br>+ Oxidation (M)  |
| <a href="#">4480</a> | 684 - 693   | 678.7980 | 1355.5815 | 1355.5816 | -0.075 | 0 | 27    | 0.0054  | 1    | K | EWLTFMEDR.R<br>+ Oxidation (M)  |
| <a href="#">4482</a> | 684 - 693   | 678.7983 | 1355.5820 | 1355.5816 | 0.32   | 0 | 30    | 0.0051  | 1    | K | EWLTFMEDR.R<br>+ Oxidation (M)  |
| <a href="#">4483</a> | 684 - 693   | 678.7985 | 1355.5824 | 1355.5816 | 0.62   | 0 | 36    | 0.0078  | 1    | K | EWLTFMEDR.R<br>+ Oxidation (M)  |
| <a href="#">8671</a> | 697 - 712   | 610.9991 | 1829.9754 | 1829.9788 | -1.84  | 1 | 56    | 5.7e-05 | 1    | U | R.RLHGLPEQFLYGTATK.H            |
| <a href="#">8672</a> | 697 - 712   | 610.9994 | 1829.9764 | 1829.9788 | -1.31  | 1 | 48    | 0.00034 | 1    | U | R.RLHGLPEQFLYGTATK.H            |
| <a href="#">8673</a> | 697 - 712   | 610.9995 | 1829.9766 | 1829.9788 | -1.23  | 1 | 44    | 0.00027 | 1    | U | R.RLHGLPEQFLYGTATK.H            |
| <a href="#">8674</a> | 697 - 712   | 610.9995 | 1829.9767 | 1829.9788 | -1.15  | 1 | 33    | 0.0023  | 1    | U | R.RLHGLPEQFLYGTATK.H            |
| <a href="#">8675</a> | 697 - 712   | 610.9996 | 1829.9770 | 1829.9788 | -1.00  | 1 | 23    | 0.016   | 1    | U | R.RLHGLPEQFLYGTATK.H            |
| <a href="#">8678</a> | 697 - 712   | 610.9998 | 1829.9776 | 1829.9788 | -0.64  | 1 | 27    | 0.018   | 1    | U | R.RLHGLPEQFLYGTATK.H            |
| <a href="#">8679</a> | 697 - 712   | 915.9963 | 1829.9780 | 1829.9788 | -0.46  | 1 | 88    | 1e-08   | 1    | U | R.RLHGLPEQFLYGTATK.H            |
| <a href="#">8680</a> | 697 - 712   | 611.0000 | 1829.9780 | 1829.9788 | -0.43  | 1 | 35    | 0.0052  | 1    | U | R.RLHGLPEQFLYGTATK.H            |
| <a href="#">8682</a> | 697 - 712   | 611.0002 | 1829.9788 | 1829.9788 | 0.014  | 1 | 33    | 0.0064  | 1    | U | R.RLHGLPEQFLYGTATK.H            |
| <a href="#">8683</a> | 697 - 712   | 611.0002 | 1829.9789 | 1829.9788 | 0.031  | 1 | 48    | 0.00019 | 1    | U | R.RLHGLPEQFLYGTATK.H            |
| <a href="#">8685</a> | 697 - 712   | 611.0004 | 1829.9793 | 1829.9788 | 0.24   | 1 | 65    | 1.5e-05 | 1    | U | R.RLHGLPEQFLYGTATK.H            |
| <a href="#">8687</a> | 697 - 712   | 611.0005 | 1829.9796 | 1829.9788 | 0.41   | 1 | 30    | 0.0044  | 1    | U | R.RLHGLPEQFLYGTATK.H            |
| <a href="#">8688</a> | 697 - 712   | 611.0005 | 1829.9798 | 1829.9788 | 0.54   | 1 | 22    | 0.017   | 1    | U | R.RLHGLPEQFLYGTATK.H            |
| <a href="#">8689</a> | 697 - 712   | 915.9972 | 1829.9798 | 1829.9788 | 0.55   | 1 | 82    | 6e-08   | 1    | U | R.RLHGLPEQFLYGTATK.H            |
| <a href="#">7292</a> | 698 - 712   | 837.9453 | 1673.8760 | 1673.8777 | -1.01  | 0 | 39    | 0.00026 | 1    | U | R.LHGLPEQFLYGTATK.H             |
| <a href="#">7293</a> | 698 - 712   | 837.9453 | 1673.8761 | 1673.8777 | -0.95  | 0 | 24    | 0.007   | 1    | U | R.LHGLPEQFLYGTATK.H             |
| <a href="#">7294</a> | 698 - 712   | 558.9660 | 1673.8763 | 1673.8777 | -0.86  | 0 | 35    | 0.0023  | 1    | U | R.LHGLPEQFLYGTATK.H             |
| <a href="#">7295</a> | 698 - 712   | 837.9454 | 1673.8763 | 1673.8777 | -0.86  | 0 | 18    | 0.031   | 1    | U | R.LHGLPEQFLYGTATK.H             |
| <a href="#">7296</a> | 698 - 712   | 837.9456 | 1673.8766 | 1673.8777 | -0.65  | 0 | 19    | 0.018   | 1    | U | R.LHGLPEQFLYGTATK.H             |
| <a href="#">7298</a> | 698 - 712   | 837.9456 | 1673.8767 | 1673.8777 | -0.58  | 0 | 28    | 0.0025  | 1    | U | R.LHGLPEQFLYGTATK.H             |
| <a href="#">7299</a> | 698 - 712   | 558.9662 | 1673.8767 | 1673.8777 | -0.57  | 0 | 37    | 0.0022  | 1    | U | R.LHGLPEQFLYGTATK.H             |
| <a href="#">7300</a> | 698 - 712   | 837.9458 | 1673.8770 | 1673.8777 | -0.41  | 0 | 20    | 0.014   | 1    | U | R.LHGLPEQFLYGTATK.H             |
| <a href="#">7301</a> | 698 - 712   | 837.9458 | 1673.8770 | 1673.8777 | -0.40  | 0 | 28    | 0.0025  | 1    | U | R.LHGLPEQFLYGTATK.H             |
| <a href="#">7304</a> | 698 - 712   | 837.9458 | 1673.8771 | 1673.8777 | -0.34  | 0 | 27    | 0.0031  | 1    | U | R.LHGLPEQFLYGTATK.H             |
| <a href="#">7305</a> | 698 - 712   | 837.9459 | 1673.8772 | 1673.8777 | -0.32  | 0 | 69    | 1.1e-06 | 1    | U | R.LHGLPEQFLYGTATK.H             |
| <a href="#">7306</a> | 698 - 712   | 837.9459 | 1673.8773 | 1673.8777 | -0.23  | 0 | 39    | 0.00032 | 1    | U | R.LHGLPEQFLYGTATK.H             |
| <a href="#">7307</a> | 698 - 712   | 837.9459 | 1673.8773 | 1673.8777 | -0.23  | 0 | 57    | 4.4e-06 | 1    | U | R.LHGLPEQFLYGTATK.H             |
| <a href="#">7308</a> | 698 - 712   | 837.9459 | 1673.8773 | 1673.8777 | -0.23  | 0 | 32    | 0.00092 | 1    | U | R.LHGLPEQFLYGTATK.H             |
| <a href="#">7309</a> | 698 - 712   | 837.9459 | 1673.8773 | 1673.8777 | -0.22  | 0 | 61    | 3.8e-06 | 1    | U | R.LHGLPEQFLYGTATK.H             |
| <a href="#">7312</a> | 698 - 712   | 558.9665 | 1673.8776 | 1673.8777 | -0.089 | 0 | 27    | 0.031   | 1    | U | R.LHGLPEQFLYGTATK.H             |
| <a href="#">7313</a> | 698 - 712   | 558.9665 | 1673.8776 | 1673.8777 | -0.089 | 0 | 22    | 0.019   | 1    | U | R.LHGLPEQFLYGTATK.H             |
| <a href="#">7314</a> | 698 - 712   | 837.9461 | 1673.8776 | 1673.8777 | -0.068 | 0 | 25    | 0.0048  | 1    | U | R.LHGLPEQFLYGTATK.H             |
| <a href="#">7316</a> | 698 - 712   | 558.9665 | 1673.8776 | 1673.8777 | -0.053 | 0 | 28    | 0.012   | 1    | U | R.LHGLPEQFLYGTATK.H             |
| <a href="#">7317</a> | 698 - 712   | 558.9665 | 1673.8777 | 1673.8777 | -0.017 | 0 | 38    | 0.0027  | 1    | U | R.LHGLPEQFLYGTATK.H             |
| <a href="#">7318</a> | 698 - 712   | 558.9666 | 1673.8779 | 1673.8777 | 0.11   | 0 | 45    | 0.00077 | 1    | U | R.LHGLPEQFLYGTATK.H             |
| <a href="#">7319</a> | 698 - 712   | 558.9666 | 1673.8779 | 1673.8777 | 0.13   | 0 | 48    | 0.00032 | 1    | U | R.LHGLPEQFLYGTATK.H             |

| Query                 | Start - End | Observed | Mr (expt) | Mr (calc) | ppm    | M | Score | Expect  | Rank | U | Peptide                         |
|-----------------------|-------------|----------|-----------|-----------|--------|---|-------|---------|------|---|---------------------------------|
| <a href="#">7320</a>  | 698 - 712   | 558.9666 | 1673.8780 | 1673.8777 | 0.16   | 0 | 32    | 0.012   | 1    | U | R.LHGLPEQFLYGTATK.H             |
| <a href="#">7321</a>  | 698 - 712   | 558.9666 | 1673.8780 | 1673.8777 | 0.16   | 0 | 34    | 0.013   | 1    | U | R.LHGLPEQFLYGTATK.H             |
| <a href="#">7323</a>  | 698 - 712   | 837.9463 | 1673.8780 | 1673.8777 | 0.17   | 0 | 26    | 0.0038  | 1    | U | R.LHGLPEQFLYGTATK.H             |
| <a href="#">7324</a>  | 698 - 712   | 837.9463 | 1673.8780 | 1673.8777 | 0.20   | 0 | 16    | 0.029   | 1    | U | R.LHGLPEQFLYGTATK.H             |
| <a href="#">7325</a>  | 698 - 712   | 558.9666 | 1673.8781 | 1673.8777 | 0.22   | 0 | 44    | 0.00084 | 1    | U | R.LHGLPEQFLYGTATK.H             |
| <a href="#">7326</a>  | 698 - 712   | 558.9666 | 1673.8781 | 1673.8777 | 0.23   | 0 | 26    | 0.026   | 1    | U | R.LHGLPEQFLYGTATK.H             |
| <a href="#">7327</a>  | 698 - 712   | 558.9667 | 1673.8782 | 1673.8777 | 0.27   | 0 | 49    | 0.001   | 1    | U | R.LHGLPEQFLYGTATK.H             |
| <a href="#">7328</a>  | 698 - 712   | 558.9667 | 1673.8782 | 1673.8777 | 0.27   | 0 | 32    | 0.019   | 1    | U | R.LHGLPEQFLYGTATK.H             |
| <a href="#">7329</a>  | 698 - 712   | 558.9667 | 1673.8783 | 1673.8777 | 0.34   | 0 | 26    | 0.022   | 1    | U | R.LHGLPEQFLYGTATK.H             |
| <a href="#">7330</a>  | 698 - 712   | 558.9667 | 1673.8784 | 1673.8777 | 0.39   | 0 | 49    | 0.00017 | 1    | U | R.LHGLPEQFLYGTATK.H             |
| <a href="#">7331</a>  | 698 - 712   | 558.9667 | 1673.8784 | 1673.8777 | 0.39   | 0 | 37    | 0.0037  | 1    | U | R.LHGLPEQFLYGTATK.H             |
| <a href="#">7332</a>  | 698 - 712   | 558.9668 | 1673.8785 | 1673.8777 | 0.45   | 0 | 35    | 0.0055  | 1    | U | R.LHGLPEQFLYGTATK.H             |
| <a href="#">7333</a>  | 698 - 712   | 837.9467 | 1673.8789 | 1673.8777 | 0.70   | 0 | 21    | 0.011   | 1    | U | R.LHGLPEQFLYGTATK.H             |
| <a href="#">7334</a>  | 698 - 712   | 837.9468 | 1673.8791 | 1673.8777 | 0.82   | 0 | 25    | 0.0049  | 1    | U | R.LHGLPEQFLYGTATK.H             |
| <a href="#">7335</a>  | 698 - 712   | 837.9469 | 1673.8793 | 1673.8777 | 0.96   | 0 | 25    | 0.0044  | 1    | U | R.LHGLPEQFLYGTATK.H             |
| <a href="#">7336</a>  | 698 - 712   | 558.9671 | 1673.8794 | 1673.8777 | 0.99   | 0 | 29    | 0.0061  | 1    | U | R.LHGLPEQFLYGTATK.H             |
| <a href="#">7338</a>  | 698 - 712   | 837.9476 | 1673.8806 | 1673.8777 | 1.74   | 0 | 17    | 0.026   | 1    | U | R.LHGLPEQFLYGTATK.H             |
| <a href="#">3726</a>  | 713 - 722   | 632.8189 | 1263.6232 | 1263.6248 | -1.24  | 0 | 37    | 0.014   | 1    | U | K.HLTYNDFINK.E                  |
| <a href="#">3727</a>  | 713 - 722   | 632.8193 | 1263.6241 | 1263.6248 | -0.54  | 0 | 24    | 0.036   | 1    | U | K.HLTYNDFINK.E                  |
| <a href="#">3729</a>  | 713 - 722   | 632.8194 | 1263.6242 | 1263.6248 | -0.45  | 0 | 23    | 0.023   | 1    | U | K.HLTYNDFINK.E                  |
| <a href="#">3730</a>  | 713 - 722   | 632.8194 | 1263.6242 | 1263.6248 | -0.45  | 0 | 24    | 0.0077  | 1    | U | K.HLTYNDFINK.E                  |
| <a href="#">3731</a>  | 713 - 722   | 632.8194 | 1263.6243 | 1263.6248 | -0.38  | 0 | 24    | 0.009   | 1    | U | K.HLTYNDFINK.E                  |
| <a href="#">3732</a>  | 713 - 722   | 422.2154 | 1263.6243 | 1263.6248 | -0.36  | 0 | 34    | 0.0054  | 1    | U | K.HLTYNDFINK.E                  |
| <a href="#">3733</a>  | 713 - 722   | 632.8195 | 1263.6244 | 1263.6248 | -0.32  | 0 | 28    | 0.02    | 1    | U | K.HLTYNDFINK.E                  |
| <a href="#">3734</a>  | 713 - 722   | 632.8195 | 1263.6244 | 1263.6248 | -0.27  | 0 | 23    | 0.038   | 1    | U | K.HLTYNDFINK.E                  |
| <a href="#">3735</a>  | 713 - 722   | 632.8195 | 1263.6245 | 1263.6248 | -0.19  | 0 | 27    | 0.032   | 1    | U | K.HLTYNDFINK.E                  |
| <a href="#">3736</a>  | 713 - 722   | 422.2155 | 1263.6246 | 1263.6248 | -0.15  | 0 | 27    | 0.014   | 1    | U | K.HLTYNDFINK.E                  |
| <a href="#">3738</a>  | 713 - 722   | 632.8196 | 1263.6246 | 1263.6248 | -0.097 | 0 | 36    | 0.0055  | 1    | U | K.HLTYNDFINK.E                  |
| <a href="#">3739</a>  | 713 - 722   | 632.8196 | 1263.6247 | 1263.6248 | -0.066 | 0 | 39    | 0.00041 | 1    | U | K.HLTYNDFINK.E                  |
| <a href="#">3741</a>  | 713 - 722   | 632.8197 | 1263.6248 | 1263.6248 | 0.013  | 0 | 25    | 0.018   | 1    | U | K.HLTYNDFINK.E                  |
| <a href="#">3742</a>  | 713 - 722   | 632.8197 | 1263.6248 | 1263.6248 | 0.061  | 0 | 24    | 0.0088  | 1    | U | K.HLTYNDFINK.E                  |
| <a href="#">3743</a>  | 713 - 722   | 632.8198 | 1263.6250 | 1263.6248 | 0.17   | 0 | 15    | 0.044   | 1    | U | K.HLTYNDFINK.E                  |
| <a href="#">3744</a>  | 713 - 722   | 632.8199 | 1263.6252 | 1263.6248 | 0.33   | 0 | 30    | 0.0026  | 1    | U | K.HLTYNDFINK.E                  |
| <a href="#">3745</a>  | 713 - 722   | 632.8199 | 1263.6252 | 1263.6248 | 0.36   | 0 | 30    | 0.0029  | 1    | U | K.HLTYNDFINK.E                  |
| <a href="#">3746</a>  | 713 - 722   | 632.8199 | 1263.6253 | 1263.6248 | 0.39   | 0 | 30    | 0.0036  | 1    | U | K.HLTYNDFINK.E                  |
| <a href="#">3747</a>  | 713 - 722   | 632.8199 | 1263.6253 | 1263.6248 | 0.44   | 0 | 39    | 0.00034 | 1    | U | K.HLTYNDFINK.E                  |
| <a href="#">3748</a>  | 713 - 722   | 632.8199 | 1263.6253 | 1263.6248 | 0.44   | 0 | 22    | 0.021   | 1    | U | K.HLTYNDFINK.E                  |
| <a href="#">3749</a>  | 713 - 722   | 632.8200 | 1263.6254 | 1263.6248 | 0.50   | 0 | 25    | 0.0058  | 1    | U | K.HLTYNDFINK.E                  |
| <a href="#">3750</a>  | 713 - 722   | 632.8201 | 1263.6256 | 1263.6248 | 0.63   | 0 | 27    | 0.0077  | 1    | U | K.HLTYNDFINK.E                  |
| <a href="#">3751</a>  | 713 - 722   | 632.8201 | 1263.6256 | 1263.6248 | 0.65   | 0 | 30    | 0.0038  | 1    | U | K.HLTYNDFINK.E                  |
| <a href="#">3752</a>  | 713 - 722   | 632.8201 | 1263.6256 | 1263.6248 | 0.68   | 0 | 23    | 0.0081  | 1    | U | K.HLTYNDFINK.E                  |
| <a href="#">3753</a>  | 713 - 722   | 632.8201 | 1263.6256 | 1263.6248 | 0.68   | 0 | 35    | 0.0016  | 1    | U | K.HLTYNDFINK.E                  |
| <a href="#">3755</a>  | 713 - 722   | 632.8202 | 1263.6258 | 1263.6248 | 0.84   | 0 | 26    | 0.005   | 1    | U | K.HLTYNDFINK.E                  |
| <a href="#">3756</a>  | 713 - 722   | 632.8202 | 1263.6259 | 1263.6248 | 0.87   | 0 | 31    | 0.0037  | 1    | U | K.HLTYNDFINK.E                  |
| <a href="#">11724</a> | 713 - 734   | 894.7768 | 2681.3087 | 2681.3085 | 0.082  | 1 | 39    | 0.0011  | 1    | U | K.HLTYNDFINKELILFNSDNER.S       |
| <a href="#">11725</a> | 713 - 734   | 894.7772 | 2681.3098 | 2681.3085 | 0.48   | 1 | 49    | 9.4e-05 | 1    | U | K.HLTYNDFINKELILFNSDNER.S       |
| <a href="#">5033</a>  | 723 - 734   | 718.8537 | 1435.6928 | 1435.6943 | -1.02  | 0 | 32    | 0.0081  | 1    | K | ELILFNSDNER.S                   |
| <a href="#">5034</a>  | 723 - 734   | 718.8537 | 1435.6929 | 1435.6943 | -0.96  | 0 | 33    | 0.0063  | 1    | K | ELILFNSDNER.S                   |
| <a href="#">5036</a>  | 723 - 734   | 718.8542 | 1435.6939 | 1435.6943 | -0.25  | 0 | 36    | 0.0042  | 1    | K | ELILFNSDNER.S                   |
| <a href="#">5037</a>  | 723 - 734   | 718.8543 | 1435.6940 | 1435.6943 | -0.21  | 0 | 27    | 0.024   | 1    | K | ELILFNSDNER.S                   |
| <a href="#">5039</a>  | 723 - 734   | 718.8544 | 1435.6943 | 1435.6943 | 0.040  | 0 | 28    | 0.033   | 1    | K | ELILFNSDNER.S                   |
| <a href="#">5040</a>  | 723 - 734   | 718.8544 | 1435.6943 | 1435.6943 | 0.040  | 0 | 40    | 0.0081  | 1    | K | ELILFNSDNER.S                   |
| <a href="#">5041</a>  | 723 - 734   | 718.8545 | 1435.6945 | 1435.6943 | 0.14   | 0 | 31    | 0.0073  | 1    | K | ELILFNSDNER.S                   |
| <a href="#">5042</a>  | 723 - 734   | 718.8546 | 1435.6947 | 1435.6943 | 0.26   | 0 | 52    | 0.00016 | 1    | K | ELILFNSDNER.S                   |
| <a href="#">5043</a>  | 723 - 734   | 718.8547 | 1435.6948 | 1435.6943 | 0.39   | 0 | 36    | 0.0025  | 1    | K | ELILFNSDNER.S                   |
| <a href="#">5044</a>  | 723 - 734   | 718.8547 | 1435.6948 | 1435.6943 | 0.39   | 0 | 36    | 0.0032  | 1    | K | ELILFNSDNER.S                   |
| <a href="#">5045</a>  | 723 - 734   | 718.8547 | 1435.6949 | 1435.6943 | 0.42   | 0 | 31    | 0.0063  | 1    | K | ELILFNSDNER.S                   |
| <a href="#">5047</a>  | 723 - 734   | 718.8548 | 1435.6951 | 1435.6943 | 0.57   | 0 | 34    | 0.0052  | 1    | K | ELILFNSDNER.S                   |
| <a href="#">5048</a>  | 723 - 734   | 718.8549 | 1435.6952 | 1435.6943 | 0.65   | 0 | 31    | 0.013   | 1    | K | ELILFNSDNER.S                   |
| <a href="#">5050</a>  | 723 - 734   | 718.8550 | 1435.6954 | 1435.6943 | 0.75   | 0 | 36    | 0.018   | 1    | K | ELILFNSDNER.S                   |
| <a href="#">5052</a>  | 723 - 734   | 718.8551 | 1435.6957 | 1435.6943 | 1.00   | 0 | 33    | 0.0084  | 1    | K | ELILFNSDNER.S                   |
| <a href="#">5053</a>  | 723 - 734   | 718.8552 | 1435.6958 | 1435.6943 | 1.07   | 0 | 28    | 0.019   | 1    | K | ELILFNSDNER.S                   |
| <a href="#">5054</a>  | 723 - 734   | 718.8552 | 1435.6959 | 1435.6943 | 1.13   | 0 | 36    | 0.0015  | 1    | K | ELILFNSDNER.S                   |
| <a href="#">5055</a>  | 723 - 734   | 718.8554 | 1435.6963 | 1435.6943 | 1.41   | 0 | 31    | 0.0084  | 1    | K | ELILFNSDNER.S                   |
| <a href="#">5057</a>  | 723 - 734   | 718.8569 | 1435.6992 | 1435.6943 | 3.45   | 0 | 30    | 0.0067  | 1    | K | ELILFNSDNER.S                   |
| <a href="#">5629</a>  | 735 - 748   | 750.9114 | 1499.8082 | 1499.8096 | -0.95  | 0 | 48    | 0.00031 | 1    | U | R.SIPSLVDGFKPGQR.K              |
| <a href="#">5638</a>  | 735 - 748   | 750.9120 | 1499.8094 | 1499.8096 | -0.12  | 0 | 52    | 4.9e-05 | 1    | U | R.SIPSLVDGFKPGQR.K              |
| <a href="#">5644</a>  | 735 - 748   | 750.9123 | 1499.8100 | 1499.8096 | 0.26   | 0 | 41    | 0.00056 | 1    | U | R.SIPSLVDGFKPGQR.K              |
| <a href="#">5645</a>  | 735 - 748   | 750.9123 | 1499.8100 | 1499.8096 | 0.28   | 0 | 49    | 3.6e-05 | 1    | U | R.SIPSLVDGFKPGQR.K              |
| <a href="#">5646</a>  | 735 - 748   | 750.9124 | 1499.8103 | 1499.8096 | 0.45   | 0 | 36    | 0.0021  | 1    | U | R.SIPSLVDGFKPGQR.K              |
| <a href="#">5652</a>  | 735 - 748   | 750.9129 | 1499.8112 | 1499.8096 | 1.02   | 0 | 35    | 0.00076 | 1    | U | R.SIPSLVDGFKPGQR.K              |
| <a href="#">2409</a>  | 815 - 825   | 554.7966 | 1107.5787 | 1107.5785 | 0.20   | 1 | 62    | 1.1e-05 | 1    | U | R.LHGGKDAASPR.Y                 |
| <a href="#">4190</a>  | 826 - 836   | 658.3567 | 1314.6989 | 1314.7006 | -1.25  | 0 | 43    | 0.0011  | 1    | U | R.YIFTMLSTLAR.L                 |
| <a href="#">4191</a>  | 826 - 836   | 658.3570 | 1314.6994 | 1314.7006 | -0.87  | 0 | 39    | 0.0014  | 1    | U | R.YIFTMLSTLAR.L                 |
| <a href="#">4192</a>  | 826 - 836   | 658.3572 | 1314.6999 | 1314.7006 | -0.54  | 0 | 38    | 0.00067 | 1    | U | R.YIFTMLSTLAR.L                 |
| <a href="#">4193</a>  | 826 - 836   | 658.3574 | 1314.7003 | 1314.7006 | -0.20  | 0 | 25    | 0.022   | 1    | U | R.YIFTMLSTLAR.L                 |
| <a href="#">4194</a>  | 826 - 836   | 658.3576 | 1314.7007 | 1314.7006 | 0.100  | 0 | 47    | 0.00011 | 1    | U | R.YIFTMLSTLAR.L                 |
| <a href="#">4195</a>  | 826 - 836   | 658.3577 | 1314.7009 | 1314.7006 | 0.22   | 0 | 46    | 0.00018 | 1    | U | R.YIFTMLSTLAR.L                 |
| <a href="#">4196</a>  | 826 - 836   | 658.3577 | 1314.7009 | 1314.7006 | 0.25   | 0 | 50    | 7.1e-05 | 1    | U | R.YIFTMLSTLAR.L                 |
| <a href="#">4197</a>  | 826 - 836   | 658.3578 | 1314.7011 | 1314.7006 | 0.37   | 0 | 34    | 0.0031  | 1    | U | R.YIFTMLSTLAR.L                 |
| <a href="#">4198</a>  | 826 - 836   | 658.3579 | 1314.7012 | 1314.7006 | 0.50   | 0 | 47    | 0.00093 | 1    | U | R.YIFTMLSTLAR.L                 |
| <a href="#">4199</a>  | 826 - 836   | 658.3579 | 1314.7013 | 1314.7006 | 0.53   | 0 | 34    | 0.0049  | 1    | U | R.YIFTMLSTLAR.L                 |
| <a href="#">4200</a>  | 826 - 836   | 658.3580 | 1314.7015 | 1314.7006 | 0.72   | 0 | 50    | 5.3e-05 | 1    | U | R.YIFTMLSTLAR.L                 |
| <a href="#">4201</a>  | 826 - 836   | 658.3581 | 1314.7016 | 1314.7006 | 0.75   | 0 | 45    | 0.0003  | 1    | U | R.YIFTMLSTLAR.L                 |
| <a href="#">4325</a>  | 826 - 836   | 666.3540 | 1330.6934 | 1330.6955 | -1.57  | 0 | 31    | 0.006   | 1    | U | R.YIFTMLSTLAR.L + Oxidation (M) |
| <a href="#">4326</a>  | 826 - 836   | 666.3548 | 1330.6949 | 1330.6955 | -0.41  | 0 | 31    | 0.0026  | 1    | U | R.YIFTMLSTLAR.L + Oxidation (M) |
| <a href="#">4329</a>  | 826 - 836   | 666.3548 | 1330.6951 | 1330.6955 | -0.26  | 0 | 50    | 8.5e-05 | 1    | U | R.YIFTMLSTLAR.L + Oxidation (M) |
| <a href="#">4330</a>  | 826 - 836   | 666.3549 | 1330.6952 | 1330.6955 | -0.19  | 0 | 18    | 0.045   | 1    | U | R.YIFTMLSTLAR.L + Oxidation (M) |
| <a href="#">4331</a>  | 826 - 836   | 666.3550 | 1330.6954 | 1330.6955 | -0.066 | 0 | 49    | 7.9e-05 | 1    | U | R.YIFTMLSTLAR.L                 |

| Query                 | Start - End | Observed  | Mr (expt) | Mr (calc) | ppm     | M | Score | Expect  | Rank | U | Peptide                                                                                                                                                                                                                                                                                                                                                                                                                                                                                |
|-----------------------|-------------|-----------|-----------|-----------|---------|---|-------|---------|------|---|----------------------------------------------------------------------------------------------------------------------------------------------------------------------------------------------------------------------------------------------------------------------------------------------------------------------------------------------------------------------------------------------------------------------------------------------------------------------------------------|
| <a href="#">4332</a>  | 826 - 836   | 666.3550  | 1330.6955 | 1330.6955 | -0.0060 | 0 | 35    | 0.0014  | 1    | 1 | R.YIFTM <sup>...</sup> LS <sup>...</sup> T <sup>...</sup> L <sup>...</sup> A <sup>...</sup> R <sup>...</sup> .L<br>+ Oxidation (M)                                                                                                                                                                                                                                                                                                                                                     |
| <a href="#">4333</a>  | 826 - 836   | 666.3550  | 1330.6955 | 1330.6955 | 0.039   | 0 | 39    | 0.00092 | 1    | 1 | R.YIFTM <sup>...</sup> LS <sup>...</sup> T <sup>...</sup> L <sup>...</sup> A <sup>...</sup> R <sup>...</sup> .L<br>+ Oxidation (M)                                                                                                                                                                                                                                                                                                                                                     |
| <a href="#">4334</a>  | 826 - 836   | 666.3551  | 1330.6956 | 1330.6955 | 0.099   | 0 | 27    | 0.0069  | 1    | 1 | R.YIFTM <sup>...</sup> LS <sup>...</sup> T <sup>...</sup> L <sup>...</sup> A <sup>...</sup> R <sup>...</sup> .L<br>+ Oxidation (M)                                                                                                                                                                                                                                                                                                                                                     |
| <a href="#">4335</a>  | 826 - 836   | 666.3551  | 1330.6957 | 1330.6955 | 0.14    | 0 | 54    | 3.8e-05 | 1    | 1 | R.YIFTM <sup>...</sup> LS <sup>...</sup> T <sup>...</sup> L <sup>...</sup> A <sup>...</sup> R <sup>...</sup> .L<br>+ Oxidation (M)                                                                                                                                                                                                                                                                                                                                                     |
| <a href="#">4336</a>  | 826 - 836   | 666.3552  | 1330.6957 | 1330.6955 | 0.19    | 0 | 42    | 0.00025 | 1    | 1 | R.YIFTM <sup>...</sup> LS <sup>...</sup> T <sup>...</sup> L <sup>...</sup> A <sup>...</sup> R <sup>...</sup> .L<br>+ Oxidation (M)                                                                                                                                                                                                                                                                                                                                                     |
| <a href="#">4337</a>  | 826 - 836   | 666.3552  | 1330.6959 | 1330.6955 | 0.32    | 0 | 20    | 0.014   | 1    | 1 | R.YIFTM <sup>...</sup> LS <sup>...</sup> T <sup>...</sup> L <sup>...</sup> A <sup>...</sup> R <sup>...</sup> .L<br>+ Oxidation (M)                                                                                                                                                                                                                                                                                                                                                     |
| <a href="#">4339</a>  | 826 - 836   | 666.3554  | 1330.6961 | 1330.6955 | 0.49    | 0 | 16    | 0.031   | 1    | 1 | R.YIFTM <sup>...</sup> LS <sup>...</sup> T <sup>...</sup> L <sup>...</sup> A <sup>...</sup> R <sup>...</sup> .L<br>+ Oxidation (M)                                                                                                                                                                                                                                                                                                                                                     |
| <a href="#">4341</a>  | 826 - 836   | 666.3555  | 1330.6964 | 1330.6955 | 0.70    | 0 | 50    | 6.7e-05 | 1    | 1 | R.YIFTM <sup>...</sup> LS <sup>...</sup> T <sup>...</sup> L <sup>...</sup> A <sup>...</sup> R <sup>...</sup> .L<br>+ Oxidation (M)                                                                                                                                                                                                                                                                                                                                                     |
| <a href="#">4342</a>  | 826 - 836   | 666.3555  | 1330.6964 | 1330.6955 | 0.72    | 0 | 32    | 0.0035  | 1    | 1 | R.YIFTM <sup>...</sup> LS <sup>...</sup> T <sup>...</sup> L <sup>...</sup> A <sup>...</sup> R <sup>...</sup> .L<br>+ Oxidation (M)                                                                                                                                                                                                                                                                                                                                                     |
| <a href="#">4506</a>  | 837 - 848   | 679.3895  | 1356.7644 | 1356.7653 | -0.68   | 0 | 23    | 0.036   | 1    | 1 | R.LLFP <sup>...</sup> AV <sup>...</sup> DD <sup>...</sup> N <sup>...</sup> LL <sup>...</sup> K <sup>...</sup> .F                                                                                                                                                                                                                                                                                                                                                                       |
| <a href="#">4508</a>  | 837 - 848   | 679.3896  | 1356.7647 | 1356.7653 | -0.41   | 0 | 36    | 0.0021  | 1    | 1 | R.LLFP <sup>...</sup> AV <sup>...</sup> DD <sup>...</sup> N <sup>...</sup> LL <sup>...</sup> K <sup>...</sup> .F                                                                                                                                                                                                                                                                                                                                                                       |
| <a href="#">4509</a>  | 837 - 848   | 679.3897  | 1356.7648 | 1356.7653 | -0.35   | 0 | 28    | 0.023   | 1    | 1 | R.LLFP <sup>...</sup> AV <sup>...</sup> DD <sup>...</sup> N <sup>...</sup> LL <sup>...</sup> K <sup>...</sup> .F                                                                                                                                                                                                                                                                                                                                                                       |
| <a href="#">4510</a>  | 837 - 848   | 679.3897  | 1356.7649 | 1356.7653 | -0.27   | 0 | 33    | 0.0042  | 1    | 1 | R.LLFP <sup>...</sup> AV <sup>...</sup> DD <sup>...</sup> N <sup>...</sup> LL <sup>...</sup> K <sup>...</sup> .F                                                                                                                                                                                                                                                                                                                                                                       |
| <a href="#">4511</a>  | 837 - 848   | 679.3898  | 1356.7650 | 1356.7653 | -0.19   | 0 | 58    | 3.5e-05 | 1    | 1 | R.LLFP <sup>...</sup> AV <sup>...</sup> DD <sup>...</sup> N <sup>...</sup> LL <sup>...</sup> K <sup>...</sup> .F                                                                                                                                                                                                                                                                                                                                                                       |
| <a href="#">4512</a>  | 837 - 848   | 679.3898  | 1356.7650 | 1356.7653 | -0.18   | 0 | 41    | 0.0032  | 1    | 1 | R.LLFP <sup>...</sup> AV <sup>...</sup> DD <sup>...</sup> N <sup>...</sup> LL <sup>...</sup> K <sup>...</sup> .F                                                                                                                                                                                                                                                                                                                                                                       |
| <a href="#">4513</a>  | 837 - 848   | 679.3899  | 1356.7652 | 1356.7653 | -0.045  | 0 | 24    | 0.015   | 1    | 1 | R.LLFP <sup>...</sup> AV <sup>...</sup> DD <sup>...</sup> N <sup>...</sup> LL <sup>...</sup> K <sup>...</sup> .F                                                                                                                                                                                                                                                                                                                                                                       |
| <a href="#">4514</a>  | 837 - 848   | 679.3899  | 1356.7652 | 1356.7653 | -0.030  | 0 | 46    | 0.0011  | 1    | 1 | R.LLFP <sup>...</sup> AV <sup>...</sup> DD <sup>...</sup> N <sup>...</sup> LL <sup>...</sup> K <sup>...</sup> .F                                                                                                                                                                                                                                                                                                                                                                       |
| <a href="#">4515</a>  | 837 - 848   | 679.3899  | 1356.7653 | 1356.7653 | -0.015  | 0 | 19    | 0.032   | 1    | 1 | R.LLFP <sup>...</sup> AV <sup>...</sup> DD <sup>...</sup> N <sup>...</sup> LL <sup>...</sup> K <sup>...</sup> .F                                                                                                                                                                                                                                                                                                                                                                       |
| <a href="#">4517</a>  | 837 - 848   | 679.3899  | 1356.7653 | 1356.7653 | 0.014   | 0 | 41    | 0.0016  | 1    | 1 | R.LLFP <sup>...</sup> AV <sup>...</sup> DD <sup>...</sup> N <sup>...</sup> LL <sup>...</sup> K <sup>...</sup> .F                                                                                                                                                                                                                                                                                                                                                                       |
| <a href="#">4518</a>  | 837 - 848   | 679.3900  | 1356.7654 | 1356.7653 | 0.073   | 0 | 36    | 0.0023  | 1    | 1 | R.LLFP <sup>...</sup> AV <sup>...</sup> DD <sup>...</sup> N <sup>...</sup> LL <sup>...</sup> K <sup>...</sup> .F                                                                                                                                                                                                                                                                                                                                                                       |
| <a href="#">4519</a>  | 837 - 848   | 679.3900  | 1356.7654 | 1356.7653 | 0.073   | 0 | 48    | 0.0003  | 1    | 1 | R.LLFP <sup>...</sup> AV <sup>...</sup> DD <sup>...</sup> N <sup>...</sup> LL <sup>...</sup> K <sup>...</sup> .F                                                                                                                                                                                                                                                                                                                                                                       |
| <a href="#">4520</a>  | 837 - 848   | 679.3900  | 1356.7655 | 1356.7653 | 0.13    | 0 | 41    | 0.0013  | 1    | 1 | R.LLFP <sup>...</sup> AV <sup>...</sup> DD <sup>...</sup> N <sup>...</sup> LL <sup>...</sup> K <sup>...</sup> .F                                                                                                                                                                                                                                                                                                                                                                       |
| <a href="#">4521</a>  | 837 - 848   | 679.3901  | 1356.7656 | 1356.7653 | 0.24    | 0 | 25    | 0.006   | 1    | 1 | R.LLFP <sup>...</sup> AV <sup>...</sup> DD <sup>...</sup> N <sup>...</sup> LL <sup>...</sup> K <sup>...</sup> .F                                                                                                                                                                                                                                                                                                                                                                       |
| <a href="#">4522</a>  | 837 - 848   | 679.3901  | 1356.7656 | 1356.7653 | 0.26    | 0 | 32    | 0.0022  | 1    | 1 | R.LLFP <sup>...</sup> AV <sup>...</sup> DD <sup>...</sup> N <sup>...</sup> LL <sup>...</sup> K <sup>...</sup> .F                                                                                                                                                                                                                                                                                                                                                                       |
| <a href="#">4523</a>  | 837 - 848   | 679.3901  | 1356.7657 | 1356.7653 | 0.28    | 0 | 34    | 0.0076  | 1    | 1 | R.LLFP <sup>...</sup> AV <sup>...</sup> DD <sup>...</sup> N <sup>...</sup> LL <sup>...</sup> K <sup>...</sup> .F                                                                                                                                                                                                                                                                                                                                                                       |
| <a href="#">4525</a>  | 837 - 848   | 679.3903  | 1356.7660 | 1356.7653 | 0.52    | 0 | 58    | 2.4e-05 | 1    | 1 | R.LLFP <sup>...</sup> AV <sup>...</sup> DD <sup>...</sup> N <sup>...</sup> LL <sup>...</sup> K <sup>...</sup> .F                                                                                                                                                                                                                                                                                                                                                                       |
| <a href="#">4526</a>  | 837 - 848   | 679.3904  | 1356.7662 | 1356.7653 | 0.66    | 0 | 26    | 0.012   | 1    | 1 | R.LLFP <sup>...</sup> AV <sup>...</sup> DD <sup>...</sup> N <sup>...</sup> LL <sup>...</sup> K <sup>...</sup> .F                                                                                                                                                                                                                                                                                                                                                                       |
| <a href="#">4527</a>  | 837 - 848   | 679.3904  | 1356.7662 | 1356.7653 | 0.71    | 0 | 28    | 0.0031  | 1    | 1 | R.LLFP <sup>...</sup> AV <sup>...</sup> DD <sup>...</sup> N <sup>...</sup> LL <sup>...</sup> K <sup>...</sup> .F                                                                                                                                                                                                                                                                                                                                                                       |
| <a href="#">4528</a>  | 837 - 848   | 679.3908  | 1356.7670 | 1356.7653 | 1.24    | 0 | 48    | 0.00011 | 1    | 1 | R.LLFP <sup>...</sup> AV <sup>...</sup> DD <sup>...</sup> N <sup>...</sup> LL <sup>...</sup> K <sup>...</sup> .F                                                                                                                                                                                                                                                                                                                                                                       |
| <a href="#">2075</a>  | 849 - 856   | 535.7489  | 1069.4833 | 1069.4829 | 0.40    | 0 | 35    | 0.01    | 1    | 1 | K.FLY <sup>...</sup> DD <sup>...</sup> N <sup>...</sup> Q <sup>...</sup> R <sup>...</sup> .V                                                                                                                                                                                                                                                                                                                                                                                           |
| <a href="#">629</a>   | 885 - 891   | 424.7166  | 847.4186  | 847.4188  | -0.27   | 0 | 36    | 0.0038  | 1    | 1 | U.K.LP <sup>...</sup> NY <sup>...</sup> D <sup>...</sup> A <sup>...</sup> R <sup>...</sup> .E                                                                                                                                                                                                                                                                                                                                                                                          |
| <a href="#">630</a>   | 885 - 891   | 424.7169  | 847.4193  | 847.4188  | 0.63    | 0 | 36    | 0.009   | 1    | 1 | U.K.LP <sup>...</sup> NY <sup>...</sup> D <sup>...</sup> A <sup>...</sup> R <sup>...</sup> .E                                                                                                                                                                                                                                                                                                                                                                                          |
| <a href="#">7905</a>  | 900 - 914   | 870.9260  | 1739.8375 | 1739.8375 | 0.017   | 0 | 76    | 5.7e-07 | 1    | 1 | U.R.M <sup>...</sup> LD <sup>...</sup> G <sup>...</sup> L <sup>...</sup> D <sup>...</sup> P <sup>...</sup> H <sup>...</sup> P <sup>...</sup> M <sup>...</sup> L <sup>...</sup> P <sup>...</sup> NY <sup>...</sup> K <sup>...</sup> .N                                                                                                                                                                                                                                                  |
| <a href="#">7908</a>  | 900 - 914   | 870.9263  | 1739.8381 | 1739.8375 | 0.36    | 0 | 46    | 0.00039 | 1    | 1 | U.R.M <sup>...</sup> LD <sup>...</sup> G <sup>...</sup> L <sup>...</sup> D <sup>...</sup> P <sup>...</sup> H <sup>...</sup> P <sup>...</sup> M <sup>...</sup> L <sup>...</sup> P <sup>...</sup> NY <sup>...</sup> K <sup>...</sup> .N                                                                                                                                                                                                                                                  |
| <a href="#">8039</a>  | 900 - 914   | 586.2842  | 1755.8308 | 1755.8324 | -0.89   | 0 | 35    | 0.016   | 1    | 1 | U.R.M <sup>...</sup> LD <sup>...</sup> G <sup>...</sup> L <sup>...</sup> D <sup>...</sup> P <sup>...</sup> H <sup>...</sup> P <sup>...</sup> M <sup>...</sup> L <sup>...</sup> P <sup>...</sup> NY <sup>...</sup> K <sup>...</sup> .N<br>+ Oxidation (M)                                                                                                                                                                                                                               |
| <a href="#">8040</a>  | 900 - 914   | 878.9231  | 1755.8316 | 1755.8324 | -0.43   | 0 | 36    | 0.0013  | 1    | 1 | U.R.M <sup>...</sup> LD <sup>...</sup> G <sup>...</sup> L <sup>...</sup> D <sup>...</sup> P <sup>...</sup> H <sup>...</sup> P <sup>...</sup> M <sup>...</sup> L <sup>...</sup> P <sup>...</sup> NY <sup>...</sup> K <sup>...</sup> .N<br>+ Oxidation (M)                                                                                                                                                                                                                               |
| <a href="#">8041</a>  | 900 - 914   | 878.9232  | 1755.8319 | 1755.8324 | -0.29   | 0 | 28    | 0.014   | 1    | 1 | U.R.M <sup>...</sup> LD <sup>...</sup> G <sup>...</sup> L <sup>...</sup> D <sup>...</sup> P <sup>...</sup> H <sup>...</sup> P <sup>...</sup> M <sup>...</sup> L <sup>...</sup> P <sup>...</sup> NY <sup>...</sup> K <sup>...</sup> .N<br>+ Oxidation (M)                                                                                                                                                                                                                               |
| <a href="#">8043</a>  | 900 - 914   | 878.9237  | 1755.8329 | 1755.8324 | 0.30    | 0 | 59    | 3e-05   | 1    | 1 | U.R.M <sup>...</sup> LD <sup>...</sup> G <sup>...</sup> L <sup>...</sup> D <sup>...</sup> P <sup>...</sup> H <sup>...</sup> P <sup>...</sup> M <sup>...</sup> L <sup>...</sup> P <sup>...</sup> NY <sup>...</sup> K <sup>...</sup> .N<br>+ Oxidation (M)                                                                                                                                                                                                                               |
| <a href="#">8167</a>  | 900 - 914   | 886.9202  | 1771.8259 | 1771.8273 | -0.82   | 0 | 27    | 0.0049  | 1    | 1 | U.R.M <sup>...</sup> LD <sup>...</sup> G <sup>...</sup> L <sup>...</sup> D <sup>...</sup> P <sup>...</sup> H <sup>...</sup> P <sup>...</sup> M <sup>...</sup> L <sup>...</sup> P <sup>...</sup> NY <sup>...</sup> K <sup>...</sup> .N<br>+ 2 Oxidation (M)                                                                                                                                                                                                                             |
| <a href="#">8169</a>  | 900 - 914   | 886.9207  | 1771.8268 | 1771.8273 | -0.28   | 0 | 31    | 0.0022  | 1    | 1 | U.R.M <sup>...</sup> LD <sup>...</sup> G <sup>...</sup> L <sup>...</sup> D <sup>...</sup> P <sup>...</sup> H <sup>...</sup> P <sup>...</sup> M <sup>...</sup> L <sup>...</sup> P <sup>...</sup> NY <sup>...</sup> K <sup>...</sup> .N<br>+ 2 Oxidation (M)                                                                                                                                                                                                                             |
| <a href="#">8172</a>  | 900 - 914   | 886.9212  | 1771.8278 | 1771.8273 | 0.28    | 0 | 27    | 0.012   | 1    | 1 | U.R.M <sup>...</sup> LD <sup>...</sup> G <sup>...</sup> L <sup>...</sup> D <sup>...</sup> P <sup>...</sup> H <sup>...</sup> P <sup>...</sup> M <sup>...</sup> L <sup>...</sup> P <sup>...</sup> NY <sup>...</sup> K <sup>...</sup> .N<br>+ 2 Oxidation (M)                                                                                                                                                                                                                             |
| <a href="#">8174</a>  | 900 - 914   | 886.9213  | 1771.8280 | 1771.8273 | 0.40    | 0 | 26    | 0.0065  | 1    | 1 | U.R.M <sup>...</sup> LD <sup>...</sup> G <sup>...</sup> L <sup>...</sup> D <sup>...</sup> P <sup>...</sup> H <sup>...</sup> P <sup>...</sup> M <sup>...</sup> L <sup>...</sup> P <sup>...</sup> NY <sup>...</sup> K <sup>...</sup> .N<br>+ 2 Oxidation (M)                                                                                                                                                                                                                             |
| <a href="#">8176</a>  | 900 - 914   | 886.9216  | 1771.8286 | 1771.8273 | 0.74    | 0 | 30    | 0.0035  | 1    | 1 | U.R.M <sup>...</sup> LD <sup>...</sup> G <sup>...</sup> L <sup>...</sup> D <sup>...</sup> P <sup>...</sup> H <sup>...</sup> P <sup>...</sup> M <sup>...</sup> L <sup>...</sup> P <sup>...</sup> NY <sup>...</sup> K <sup>...</sup> .N<br>+ 2 Oxidation (M)                                                                                                                                                                                                                             |
| <a href="#">11939</a> | 915 - 939   | 938.1473  | 2811.4200 | 2811.4192 | 0.30    | 1 | 45    | 0.00013 | 1    | 1 | U.K.N <sup>...</sup> F <sup>...</sup> K <sup>...</sup> G <sup>...</sup> T <sup>...</sup> I <sup>...</sup> Q <sup>...</sup> E <sup>...</sup> L <sup>...</sup> G <sup>...</sup> Q <sup>...</sup> N <sup>...</sup> Q <sup>...</sup> Y <sup>...</sup> A <sup>...</sup> V <sup>...</sup> S <sup>...</sup> G <sup>...</sup> E <sup>...</sup> I <sup>...</sup> F <sup>...</sup> V <sup>...</sup> D <sup>...</sup> R <sup>...</sup> .N                                                         |
| <a href="#">10938</a> | 918 - 939   | 1212.1120 | 2422.2094 | 2422.2129 | -1.41   | 0 | 129   | 1.5e-12 | 1    | 1 | U.K.G <sup>...</sup> T <sup>...</sup> I <sup>...</sup> Q <sup>...</sup> E <sup>...</sup> L <sup>...</sup> G <sup>...</sup> Q <sup>...</sup> N <sup>...</sup> Q <sup>...</sup> Y <sup>...</sup> A <sup>...</sup> V <sup>...</sup> S <sup>...</sup> G <sup>...</sup> E <sup>...</sup> I <sup>...</sup> F <sup>...</sup> V <sup>...</sup> D <sup>...</sup> R <sup>...</sup> .N                                                                                                            |
| <a href="#">10944</a> | 918 - 939   | 1212.1133 | 2422.2121 | 2422.2129 | -0.31   | 0 | 18    | 0.029   | 1    | 1 | U.K.G <sup>...</sup> T <sup>...</sup> I <sup>...</sup> Q <sup>...</sup> E <sup>...</sup> L <sup>...</sup> G <sup>...</sup> Q <sup>...</sup> N <sup>...</sup> Q <sup>...</sup> Y <sup>...</sup> A <sup>...</sup> V <sup>...</sup> S <sup>...</sup> G <sup>...</sup> E <sup>...</sup> I <sup>...</sup> F <sup>...</sup> V <sup>...</sup> D <sup>...</sup> R <sup>...</sup> .N                                                                                                            |
| <a href="#">10946</a> | 918 - 939   | 808.4114  | 2422.2124 | 2422.2129 | -0.20   | 0 | 24    | 0.036   | 1    | 1 | U.K.G <sup>...</sup> T <sup>...</sup> I <sup>...</sup> Q <sup>...</sup> E <sup>...</sup> L <sup>...</sup> G <sup>...</sup> Q <sup>...</sup> N <sup>...</sup> Q <sup>...</sup> Y <sup>...</sup> A <sup>...</sup> V <sup>...</sup> S <sup>...</sup> G <sup>...</sup> E <sup>...</sup> I <sup>...</sup> F <sup>...</sup> V <sup>...</sup> D <sup>...</sup> R <sup>...</sup> .N                                                                                                            |
| <a href="#">10949</a> | 918 - 939   | 808.4116  | 2422.2129 | 2422.2129 | 0.034   | 0 | 21    | 0.032   | 1    | 1 | U.K.G <sup>...</sup> T <sup>...</sup> I <sup>...</sup> Q <sup>...</sup> E <sup>...</sup> L <sup>...</sup> G <sup>...</sup> Q <sup>...</sup> N <sup>...</sup> Q <sup>...</sup> Y <sup>...</sup> A <sup>...</sup> V <sup>...</sup> S <sup>...</sup> G <sup>...</sup> E <sup>...</sup> I <sup>...</sup> F <sup>...</sup> V <sup>...</sup> D <sup>...</sup> R <sup>...</sup> .N                                                                                                            |
| <a href="#">10950</a> | 918 - 939   | 808.4117  | 2422.2132 | 2422.2129 | 0.16    | 0 | 33    | 0.0026  | 1    | 1 | U.K.G <sup>...</sup> T <sup>...</sup> I <sup>...</sup> Q <sup>...</sup> E <sup>...</sup> L <sup>...</sup> G <sup>...</sup> Q <sup>...</sup> N <sup>...</sup> Q <sup>...</sup> Y <sup>...</sup> A <sup>...</sup> V <sup>...</sup> S <sup>...</sup> G <sup>...</sup> E <sup>...</sup> I <sup>...</sup> F <sup>...</sup> V <sup>...</sup> D <sup>...</sup> R <sup>...</sup> .N                                                                                                            |
| <a href="#">10952</a> | 918 - 939   | 808.4117  | 2422.2133 | 2422.2129 | 0.19    | 0 | 31    | 0.005   | 1    | 1 | U.K.G <sup>...</sup> T <sup>...</sup> I <sup>...</sup> Q <sup>...</sup> E <sup>...</sup> L <sup>...</sup> G <sup>...</sup> Q <sup>...</sup> N <sup>...</sup> Q <sup>...</sup> Y <sup>...</sup> A <sup>...</sup> V <sup>...</sup> S <sup>...</sup> G <sup>...</sup> E <sup>...</sup> I <sup>...</sup> F <sup>...</sup> V <sup>...</sup> D <sup>...</sup> R <sup>...</sup> .N                                                                                                            |
| <a href="#">10955</a> | 918 - 939   | 606.5608  | 2422.2139 | 2422.2129 | 0.44    | 0 | 33    | 0.0072  | 1    | 1 | U.K.G <sup>...</sup> T <sup>...</sup> I <sup>...</sup> Q <sup>...</sup> E <sup>...</sup> L <sup>...</sup> G <sup>...</sup> Q <sup>...</sup> N <sup>...</sup> Q <sup>...</sup> Y <sup>...</sup> A <sup>...</sup> V <sup>...</sup> S <sup>...</sup> G <sup>...</sup> E <sup>...</sup> I <sup>...</sup> F <sup>...</sup> V <sup>...</sup> D <sup>...</sup> R <sup>...</sup> .N                                                                                                            |
| <a href="#">10958</a> | 918 - 939   | 1212.1144 | 2422.2143 | 2422.2129 | 0.58    | 0 | 68    | 6.8e-07 | 1    | 1 | U.K.G <sup>...</sup> T <sup>...</sup> I <sup>...</sup> Q <sup>...</sup> E <sup>...</sup> L <sup>...</sup> G <sup>...</sup> Q <sup>...</sup> N <sup>...</sup> Q <sup>...</sup> Y <sup>...</sup> A <sup>...</sup> V <sup>...</sup> S <sup>...</sup> G <sup>...</sup> E <sup>...</sup> I <sup>...</sup> F <sup>...</sup> V <sup>...</sup> D <sup>...</sup> R <sup>...</sup> .N                                                                                                            |
| <a href="#">10961</a> | 918 - 939   | 808.4121  | 2422.2144 | 2422.2129 | 0.64    | 0 | 28    | 0.031   | 1    | 1 | U.K.G <sup>...</sup> T <sup>...</sup> I <sup>...</sup> Q <sup>...</sup> E <sup>...</sup> L <sup>...</sup> G <sup>...</sup> Q <sup>...</sup> N <sup>...</sup> Q <sup>...</sup> Y <sup>...</sup> A <sup>...</sup> V <sup>...</sup> S <sup>...</sup> G <sup>...</sup> E <sup>...</sup> I <sup>...</sup> F <sup>...</sup> V <sup>...</sup> D <sup>...</sup> R <sup>...</sup> .N                                                                                                            |
| <a href="#">10963</a> | 918 - 939   | 1212.1148 | 2422.2150 | 2422.2129 | 0.88    | 0 | 64    | 8.3e-06 | 1    | 1 | U.K.G <sup>...</sup> T <sup>...</sup> I <sup>...</sup> Q <sup>...</sup> E <sup>...</sup> L <sup>...</sup> G <sup>...</sup> Q <sup>...</sup> N <sup>...</sup> Q <sup>...</sup> Y <sup>...</sup> A <sup>...</sup> V <sup>...</sup> S <sup>...</sup> G <sup>...</sup> E <sup>...</sup> I <sup>...</sup> F <sup>...</sup> V <sup>...</sup> D <sup>...</sup> R <sup>...</sup> .N                                                                                                            |
| <a href="#">10965</a> | 918 - 939   | 808.4124  | 2422.2153 | 2422.2129 | 1.01    | 0 | 21    | 0.032   | 1    | 1 | U.K.G <sup>...</sup> T <sup>...</sup> I <sup>...</sup> Q <sup>...</sup> E <sup>...</sup> L <sup>...</sup> G <sup>...</sup> Q <sup>...</sup> N <sup>...</sup> Q <sup>...</sup> Y <sup>...</sup> A <sup>...</sup> V <sup>...</sup> S <sup>...</sup> G <sup>...</sup> E <sup>...</sup> I <sup>...</sup> F <sup>...</sup> V <sup>...</sup> D <sup>...</sup> R <sup>...</sup> .N                                                                                                            |
| <a href="#">13593</a> | 918 - 950   | 1225.6388 | 3673.8947 | 3673.8952 | -0.12   | 1 | 87    | 1.8e-07 | 1    | 1 | U.K.G <sup>...</sup> T <sup>...</sup> I <sup>...</sup> Q <sup>...</sup> E <sup>...</sup> L <sup>...</sup> G <sup>...</sup> Q <sup>...</sup> N <sup>...</sup> Q <sup>...</sup> Y <sup>...</sup> A <sup>...</sup> V <sup>...</sup> S <sup>...</sup> G <sup>...</sup> E <sup>...</sup> I <sup>...</sup> F <sup>...</sup> V <sup>...</sup> D <sup>...</sup> R <sup>...</sup> NT <sup>...</sup> VE <sup>...</sup> IT <sup>...</sup> EL <sup>...</sup> P <sup>...</sup> VR <sup>...</sup> .T |
| <a href="#">3798</a>  | 940 - 950   | 635.8534  | 1269.6923 | 1269.6929 | -0.43   | 0 | 27    | 0.041   | 1    | 1 | U.R.N <sup>...</sup> T <sup>...</sup> VE <sup>...</sup> IT <sup>...</sup> EL <sup>...</sup> P <sup>...</sup> VR <sup>...</sup> .T                                                                                                                                                                                                                                                                                                                                                      |
| <a href="#">3800</a>  | 940 - 950   | 635.8535  | 1269.6925 | 1269.6929 | -0.26   | 0 | 26    | 0.016   | 1    | 1 | U.R.N <sup>...</sup> T <sup>...</sup> VE <sup>...&lt;/</sup>                                                                                                                                                                                                                                                                                                                                                                                                                           |



| Query                | Start - End | Observed | Mr (expt) | Mr (calc) | ppm     | M | Score | Expect  | Rank | U | Peptide                            |
|----------------------|-------------|----------|-----------|-----------|---------|---|-------|---------|------|---|------------------------------------|
| <a href="#">9934</a> | 971 - 988   | 694.6841 | 2081.0305 | 2081.0317 | -0.56   | 1 | 26    | 0.0043  | 1    | U | K.TPALISDYKEYHTDITTKV.F            |
| <a href="#">9939</a> | 971 - 988   | 694.6847 | 2081.0323 | 2081.0317 | 0.28    | 1 | 23    | 0.014   | 1    | U | K.TPALISDYKEYHTDITTKV.F            |
| <a href="#">9940</a> | 971 - 988   | 694.6848 | 2081.0325 | 2081.0317 | 0.41    | 1 | 30    | 0.0085  | 1    | U | K.TPALISDYKEYHTDITTKV.F            |
| <a href="#">2291</a> | 980 - 988   | 547.2616 | 1092.5087 | 1092.5088 | -0.010  | 0 | 22    | 0.021   | 1    | U | K.EYHTDITTKV.F                     |
| <a href="#">7764</a> | 993 - 1008  | 576.2981 | 1725.8726 | 1725.8719 | 0.37    | 1 | 30    | 0.0028  | 1    | U | K.MTEEKLAQAEAAAGLHK.V              |
| <a href="#">2413</a> | 998 - 1008  | 554.8088 | 1107.6029 | 1107.6036 | -0.61   | 0 | 57    | 5.7e-05 | 1    | U | K.LAQAEAAAGLHK.V                   |
| <a href="#">2415</a> | 998 - 1008  | 554.8089 | 1107.6033 | 1107.6036 | -0.27   | 0 | 29    | 0.0099  | 1    | U | K.LAQAEAAAGLHK.V                   |
| <a href="#">2416</a> | 998 - 1008  | 370.2084 | 1107.6034 | 1107.6036 | -0.23   | 0 | 44    | 0.00065 | 1    | U | K.LAQAEAAAGLHK.V                   |
| <a href="#">2417</a> | 998 - 1008  | 370.2085 | 1107.6036 | 1107.6036 | 0.018   | 0 | 42    | 0.0014  | 1    | U | K.LAQAEAAAGLHK.V                   |
| <a href="#">2418</a> | 998 - 1008  | 554.8091 | 1107.6036 | 1107.6036 | 0.023   | 0 | 55    | 7.2e-05 | 1    | U | K.LAQAEAAAGLHK.V                   |
| <a href="#">2419</a> | 998 - 1008  | 370.2086 | 1107.6039 | 1107.6036 | 0.21    | 0 | 44    | 0.0011  | 1    | U | K.LAQAEAAAGLHK.V                   |
| <a href="#">2420</a> | 998 - 1008  | 554.8095 | 1107.6044 | 1107.6036 | 0.67    | 0 | 25    | 0.013   | 1    | U | K.LAQAEAAAGLHK.V                   |
| <a href="#">3486</a> | 1032 - 1041 | 618.8453 | 1235.6761 | 1235.6761 | -0.052  | 1 | 58    | 2.4e-05 | 1    | U | K.KYETVDILK.E                      |
| <a href="#">3487</a> | 1032 - 1041 | 618.8453 | 1235.6761 | 1235.6761 | -0.0032 | 1 | 41    | 0.00089 | 1    | U | K.KYETVDILK.E                      |
| <a href="#">3491</a> | 1032 - 1041 | 618.8454 | 1235.6762 | 1235.6761 | 0.078   | 1 | 31    | 0.015   | 1    | U | K.KYETVDILK.E                      |
| <a href="#">3492</a> | 1032 - 1041 | 618.8454 | 1235.6762 | 1235.6761 | 0.078   | 1 | 38    | 0.0011  | 1    | U | K.KYETVDILK.E                      |
| <a href="#">3493</a> | 1032 - 1041 | 412.8994 | 1235.6765 | 1235.6761 | 0.27    | 1 | 37    | 0.0084  | 1    | U | K.KYETVDILK.E                      |
| <a href="#">3494</a> | 1032 - 1041 | 618.8456 | 1235.6766 | 1235.6761 | 0.42    | 1 | 46    | 0.00019 | 1    | U | K.KYETVDILK.E                      |
| <a href="#">2412</a> | 1033 - 1041 | 554.7983 | 1107.5820 | 1107.5812 | 0.71    | 0 | 35    | 0.018   | 1    | U | K.YETVDILK.E                       |
| <a href="#">742</a>  | 1048 - 1054 | 436.2373 | 870.4600  | 870.4599  | 0.067   | 0 | 38    | 0.0047  | 1    | U | R.LSYYGLR.K                        |
| <a href="#">6248</a> | 1055 - 1068 | 516.9410 | 1547.8010 | 1547.8017 | -0.47   | 1 | 23    | 0.013   | 1    | U | R.KEWLVGMLGAESTK.L                 |
| <a href="#">6249</a> | 1055 - 1068 | 516.9412 | 1547.8018 | 1547.8017 | 0.058   | 1 | 30    | 0.0092  | 1    | U | R.KEWLVGMLGAESTK.L                 |
| <a href="#">6250</a> | 1055 - 1068 | 774.9082 | 1547.8019 | 1547.8017 | 0.13    | 1 | 76    | 1.9e-06 | 1    | U | R.KEWLVGMLGAESTK.L                 |
| <a href="#">6251</a> | 1055 - 1068 | 516.9414 | 1547.8024 | 1547.8017 | 0.43    | 1 | 25    | 0.04    | 1    | U | R.KEWLVGMLGAESTK.L                 |
| <a href="#">6410</a> | 1055 - 1068 | 522.2723 | 1563.7950 | 1563.7967 | -1.04   | 1 | 43    | 0.00048 | 1    | U | R.KEWLVGMLGAESTK.L + Oxidation (M) |
| <a href="#">6411</a> | 1055 - 1068 | 782.9050 | 1563.7954 | 1563.7967 | -0.79   | 1 | 54    | 5.5e-05 | 1    | U | R.KEWLVGMLGAESTK.L + Oxidation (M) |
| <a href="#">6412</a> | 1055 - 1068 | 522.2726 | 1563.7959 | 1563.7967 | -0.52   | 1 | 21    | 0.048   | 1    | U | R.KEWLVGMLGAESTK.L + Oxidation (M) |
| <a href="#">6413</a> | 1055 - 1068 | 782.9052 | 1563.7959 | 1563.7967 | -0.46   | 1 | 64    | 6.2e-06 | 1    | U | R.KEWLVGMLGAESTK.L + Oxidation (M) |
| <a href="#">6414</a> | 1055 - 1068 | 522.2726 | 1563.7960 | 1563.7967 | -0.40   | 1 | 46    | 0.00014 | 1    | U | R.KEWLVGMLGAESTK.L + Oxidation (M) |
| <a href="#">6415</a> | 1055 - 1068 | 782.9055 | 1563.7965 | 1563.7967 | -0.12   | 1 | 69    | 5.6e-06 | 1    | U | R.KEWLVGMLGAESTK.L + Oxidation (M) |
| <a href="#">6416</a> | 1055 - 1068 | 782.9057 | 1563.7968 | 1563.7967 | 0.068   | 1 | 49    | 0.00015 | 1    | U | R.KEWLVGMLGAESTK.L + Oxidation (M) |
| <a href="#">6417</a> | 1055 - 1068 | 522.2729 | 1563.7970 | 1563.7967 | 0.19    | 1 | 36    | 0.00054 | 1    | U | R.KEWLVGMLGAESTK.L + Oxidation (M) |
| <a href="#">6418</a> | 1055 - 1068 | 782.9059 | 1563.7972 | 1563.7967 | 0.32    | 1 | 67    | 1.6e-05 | 1    | U | R.KEWLVGMLGAESTK.L + Oxidation (M) |
| <a href="#">6419</a> | 1055 - 1068 | 522.2732 | 1563.7978 | 1563.7967 | 0.71    | 1 | 36    | 0.0005  | 1    | U | R.KEWLVGMLGAESTK.L + Oxidation (M) |
| <a href="#">6420</a> | 1055 - 1068 | 522.2739 | 1563.7998 | 1563.7967 | 2.00    | 1 | 45    | 0.00025 | 1    | U | R.KEWLVGMLGAESTK.L + Oxidation (M) |
| <a href="#">4914</a> | 1056 - 1068 | 710.8602 | 1419.7059 | 1419.7068 | -0.62   | 0 | 15    | 0.044   | 1    | U | K.EWLVGMLGAESTK.L                  |
| <a href="#">4915</a> | 1056 - 1068 | 710.8606 | 1419.7066 | 1419.7068 | -0.15   | 0 | 21    | 0.031   | 1    | U | K.EWLVGMLGAESTK.L                  |
| <a href="#">4916</a> | 1056 - 1068 | 710.8608 | 1419.7069 | 1419.7068 | 0.11    | 0 | 46    | 5.8e-05 | 1    | U | K.EWLVGMLGAESTK.L                  |
| <a href="#">4917</a> | 1056 - 1068 | 474.2430 | 1419.7072 | 1419.7068 | 0.29    | 0 | 25    | 0.013   | 1    | U | K.EWLVGMLGAESTK.L                  |
| <a href="#">4919</a> | 1056 - 1068 | 710.8610 | 1419.7075 | 1419.7068 | 0.49    | 0 | 17    | 0.034   | 1    | U | K.EWLVGMLGAESTK.L                  |
| <a href="#">4920</a> | 1056 - 1068 | 710.8611 | 1419.7076 | 1419.7068 | 0.59    | 0 | 36    | 0.00043 | 1    | U | K.EWLVGMLGAESTK.L                  |
| <a href="#">5058</a> | 1056 - 1068 | 718.8572 | 1435.6999 | 1435.7017 | -1.25   | 0 | 38    | 0.0045  | 1    | U | K.EWLVGMLGAESTK.L + Oxidation (M)  |
| <a href="#">5059</a> | 1056 - 1068 | 718.8574 | 1435.7003 | 1435.7017 | -0.99   | 0 | 36    | 0.0039  | 1    | U | K.EWLVGMLGAESTK.L + Oxidation (M)  |
| <a href="#">5060</a> | 1056 - 1068 | 718.8578 | 1435.7011 | 1435.7017 | -0.39   | 0 | 35    | 0.0019  | 1    | U | K.EWLVGMLGAESTK.L + Oxidation (M)  |
| <a href="#">5061</a> | 1056 - 1068 | 718.8580 | 1435.7014 | 1435.7017 | -0.24   | 0 | 37    | 0.018   | 1    | U | K.EWLVGMLGAESTK.L + Oxidation (M)  |
| <a href="#">5062</a> | 1056 - 1068 | 718.8581 | 1435.7017 | 1435.7017 | 0.0014  | 0 | 34    | 0.015   | 1    | U | K.EWLVGMLGAESTK.L + Oxidation (M)  |
| <a href="#">2120</a> | 1075 - 1083 | 538.3287 | 1074.6429 | 1074.6437 | -0.78   | 1 | 32    | 0.0028  | 1    | U | R.FILEKIQGK.I                      |
| <a href="#">3561</a> | 1092 - 1101 | 415.2443 | 1242.7111 | 1242.7118 | -0.54   | 1 | 39    | 0.0056  | 1    | U | K.KDLIQMLVQR.G                     |
| <a href="#">3562</a> | 1092 - 1101 | 622.3629 | 1242.7113 | 1242.7118 | -0.43   | 1 | 61    | 3.3e-05 | 1    | U | K.KDLIQMLVQR.G                     |
| <a href="#">3700</a> | 1092 - 1101 | 630.3608 | 1258.7070 | 1258.7067 | 0.21    | 1 | 51    | 0.00031 | 1    | U | K.KDLIQMLVQR.G + Oxidation (M)     |
| <a href="#">3701</a> | 1092 - 1101 | 630.3609 | 1258.7072 | 1258.7067 | 0.41    | 1 | 52    | 0.0004  | 1    | U | K.KDLIQMLVQR.G + Oxidation (M)     |
| <a href="#">3702</a> | 1092 - 1101 | 420.5766 | 1258.7081 | 1258.7067 | 1.11    | 1 | 38    | 0.0077  | 1    | U | K.KDLIQMLVQR.G + Oxidation (M)     |
| <a href="#">2484</a> | 1093 - 1101 | 558.3153 | 1114.6161 | 1114.6169 | -0.69   | 0 | 58    | 9e-05   | 1    | U | K.DLIQMLVQR.G                      |
| <a href="#">2485</a> | 1093 - 1101 | 558.3157 | 1114.6168 | 1114.6169 | -0.039  | 0 | 41    | 0.004   | 1    | U | K.DLIQMLVQR.G                      |
| <a href="#">2486</a> | 1093 - 1101 | 558.3157 | 1114.6169 | 1114.6169 | 0.014   | 0 | 51    | 0.00041 | 1    | U | K.DLIQMLVQR.G                      |
| <a href="#">2487</a> | 1093 - 1101 | 558.3158 | 1114.6170 | 1114.6169 | 0.10    | 0 | 27    | 0.029   | 1    | U | K.DLIQMLVQR.G                      |
| <a href="#">2488</a> | 1093 - 1101 | 558.3158 | 1114.6170 | 1114.6169 | 0.18    | 0 | 58    | 9.7e-05 | 1    | U | K.DLIQMLVQR.G                      |
| <a href="#">2489</a> | 1093 - 1101 | 558.3159 | 1114.6172 | 1114.6169 | 0.30    | 0 | 54    | 0.00021 | 1    | U | K.DLIQMLVQR.G                      |
| <a href="#">2490</a> | 1093 - 1101 | 558.3162 | 1114.6179 | 1114.6169 | 0.97    | 0 | 32    | 0.01    | 1    | U | K.DLIQMLVQR.G                      |
| <a href="#">2491</a> | 1093 - 1101 | 558.3163 | 1114.6180 | 1114.6169 | 1.00    | 0 | 31    | 0.027   | 1    | U | K.DLIQMLVQR.G                      |
| <a href="#">2650</a> | 1093 - 1101 | 566.3123 | 1130.6100 | 1130.6118 | -1.58   | 0 | 44    | 0.00086 | 1    | U | K.DLIQMLVQR.G + Oxidation (M)      |
| <a href="#">2651</a> | 1093 - 1101 | 566.3127 | 1130.6108 | 1130.6118 | -0.85   | 0 | 45    | 0.0022  | 1    | U | K.DLIQMLVQR.G + Oxidation (M)      |
| <a href="#">2652</a> | 1093 - 1101 | 566.3129 | 1130.6112 | 1130.6118 | -0.50   | 0 | 54    | 0.00022 | 1    | U | K.DLIQMLVQR.G + Oxidation (M)      |
| <a href="#">2653</a> | 1093 - 1101 | 566.3131 | 1130.6117 | 1130.6118 | -0.038  | 0 | 48    | 0.0011  | 1    | U | K.DLIQMLVQR.G + Oxidation (M)      |
| <a href="#">2654</a> | 1093 - 1101 | 566.3132 | 1130.6118 | 1130.6118 | 0.015   | 0 | 61    | 5.9e-05 | 1    | U | K.DLIQMLVQR.G + Oxidation (M)      |
| <a href="#">2655</a> | 1093 - 1101 | 566.3132 | 1130.6119 | 1130.6118 | 0.12    | 0 | 49    | 0.00052 | 1    | U | K.DLIQMLVQR.G + Oxidation (M)      |
| <a href="#">2656</a> | 1093 - 1101 | 566.3133 | 1130.6121 | 1130.6118 | 0.30    | 0 | 33    | 0.031   | 1    | U | K.DLIQMLVQR.G + Oxidation (M)      |
| <a href="#">2657</a> | 1093 - 1101 | 566.3134 | 1130.6122 | 1130.6118 | 0.35    | 0 | 39    | 0.0033  | 1    | U | K.DLIQMLVQR.G + Oxidation (M)      |

| Query                 | Start - End | Observed  | Mr (expt) | Mr (calc) | ppm    | M | Score | Expect  | Rank | U | Peptide                                            |
|-----------------------|-------------|-----------|-----------|-----------|--------|---|-------|---------|------|---|----------------------------------------------------|
| <a href="#">2658</a>  | 1093 - 1101 | 566.3134  | 1130.6122 | 1130.6118 | 0.37   | 0 | 49    | 0.00083 | 1    | U | K.DLIQMLVQR.G<br>+ Oxidation (M)                   |
| <a href="#">2659</a>  | 1093 - 1101 | 566.3134  | 1130.6123 | 1130.6118 | 0.44   | 0 | 27    | 0.042   | 1    | U | K.DLIQMLVQR.G<br>+ Oxidation (M)                   |
| <a href="#">836</a>   | 1102 - 1109 | 447.7136  | 893.4126  | 893.4131  | -0.48  | 0 | 18    | 0.048   | 1    | U | R.GYESDPVK.A                                       |
| <a href="#">837</a>   | 1102 - 1109 | 447.7137  | 893.4129  | 893.4131  | -0.21  | 0 | 27    | 0.028   | 1    | U | R.GYESDPVK.A                                       |
| <a href="#">838</a>   | 1102 - 1109 | 447.7138  | 893.4129  | 893.4131  | -0.12  | 0 | 42    | 0.00023 | 1    | U | R.GYESDPVK.A                                       |
| <a href="#">1428</a>  | 1157 - 1164 | 494.2896  | 986.5647  | 986.5648  | -0.11  | 1 | 36    | 0.013   | 1    | U | K.EKVEELIK.Q                                       |
| <a href="#">1431</a>  | 1157 - 1164 | 494.2899  | 986.5652  | 986.5648  | 0.48   | 1 | 46    | 0.0011  | 1    | U | K.EKVEELIK.Q                                       |
| <a href="#">2228</a>  | 1170 - 1178 | 543.8044  | 1085.5942 | 1085.5941 | 0.053  | 2 | 42    | 0.0034  | 1    | U | K.GREVNDLKR.K                                      |
| <a href="#">2229</a>  | 1170 - 1178 | 362.8721  | 1085.5946 | 1085.5941 | 0.42   | 2 | 41    | 0.005   | 1    | U | K.GREVNDLKR.K                                      |
| <a href="#">754</a>   | 1172 - 1178 | 437.2428  | 872.4711  | 872.4716  | -0.47  | 1 | 42    | 0.0037  | 1    | U | R.EVNDLKR.K                                        |
| <a href="#">755</a>   | 1172 - 1178 | 437.2431  | 872.4717  | 872.4716  | 0.15   | 1 | 42    | 0.0039  | 1    | U | R.EVNDLKR.K                                        |
| <a href="#">1253</a>  | 1179 - 1186 | 480.7617  | 959.5088  | 959.5076  | 1.20   | 1 | 25    | 0.042   | 1    | R | KSPSGLWK.E                                         |
| <a href="#">532</a>   | 1180 - 1186 | 416.7137  | 831.4129  | 831.4127  | 0.25   | 0 | 26    | 0.039   | 1    | K | SPSGLWK.E                                          |
| <a href="#">4654</a>  | 1187 - 1198 | 689.8402  | 1377.6658 | 1377.6664 | -0.37  | 0 | 50    | 0.00059 | 1    | U | K.EDLAAFVEELDK.V                                   |
| <a href="#">4655</a>  | 1187 - 1198 | 689.8402  | 1377.6659 | 1377.6664 | -0.31  | 0 | 35    | 0.0026  | 1    | U | K.EDLAAFVEELDK.V                                   |
| <a href="#">4656</a>  | 1187 - 1198 | 689.8405  | 1377.6664 | 1377.6664 | 0.070  | 0 | 36    | 0.0013  | 1    | U | K.EDLAAFVEELDK.V                                   |
| <a href="#">4658</a>  | 1187 - 1198 | 689.8407  | 1377.6669 | 1377.6664 | 0.39   | 0 | 64    | 8.7e-06 | 1    | U | K.EDLAAFVEELDK.V                                   |
| <a href="#">10054</a> | 1187 - 1204 | 1054.0107 | 2106.0068 | 2106.0117 | -2.29  | 1 | 80    | 3.2e-07 | 1    | U | K.EDLAAFVEELDKVESQER.E                             |
| <a href="#">10055</a> | 1187 - 1204 | 703.0103  | 2106.0090 | 2106.0117 | -1.26  | 1 | 42    | 0.0015  | 1    | U | K.EDLAAFVEELDKVESQER.E                             |
| <a href="#">10056</a> | 1187 - 1204 | 1054.0121 | 2106.0097 | 2106.0117 | -0.92  | 1 | 36    | 0.0014  | 1    | U | K.EDLAAFVEELDKVESQER.E                             |
| <a href="#">10057</a> | 1187 - 1204 | 703.0108  | 2106.0105 | 2106.0117 | -0.53  | 1 | 32    | 0.0089  | 1    | U | K.EDLAAFVEELDKVESQER.E                             |
| <a href="#">10058</a> | 1187 - 1204 | 703.0110  | 2106.0113 | 2106.0117 | -0.19  | 1 | 39    | 0.0064  | 1    | U | K.EDLAAFVEELDKVESQER.E                             |
| <a href="#">10059</a> | 1187 - 1204 | 703.0110  | 2106.0113 | 2106.0117 | -0.17  | 1 | 28    | 0.01    | 1    | U | K.EDLAAFVEELDKVESQER.E                             |
| <a href="#">10060</a> | 1187 - 1204 | 703.0112  | 2106.0118 | 2106.0117 | 0.054  | 1 | 44    | 0.0014  | 1    | U | K.EDLAAFVEELDKVESQER.E                             |
| <a href="#">10061</a> | 1187 - 1204 | 703.0112  | 2106.0119 | 2106.0117 | 0.097  | 1 | 34    | 0.003   | 1    | U | K.EDLAAFVEELDKVESQER.E                             |
| <a href="#">10062</a> | 1187 - 1204 | 1054.0132 | 2106.0119 | 2106.0117 | 0.11   | 1 | 68    | 1.8e-06 | 1    | U | K.EDLAAFVEELDKVESQER.E                             |
| <a href="#">10063</a> | 1187 - 1204 | 703.0112  | 2106.0119 | 2106.0117 | 0.11   | 1 | 43    | 0.0025  | 1    | U | K.EDLAAFVEELDKVESQER.E                             |
| <a href="#">10064</a> | 1187 - 1204 | 703.0112  | 2106.0119 | 2106.0117 | 0.11   | 1 | 37    | 0.0099  | 1    | U | K.EDLAAFVEELDKVESQER.E                             |
| <a href="#">10065</a> | 1187 - 1204 | 703.0112  | 2106.0119 | 2106.0117 | 0.13   | 1 | 42    | 0.0016  | 1    | U | K.EDLAAFVEELDKVESQER.E                             |
| <a href="#">10066</a> | 1187 - 1204 | 703.0113  | 2106.0120 | 2106.0117 | 0.14   | 1 | 38    | 0.0046  | 1    | U | K.EDLAAFVEELDKVESQER.E                             |
| <a href="#">10067</a> | 1187 - 1204 | 703.0113  | 2106.0120 | 2106.0117 | 0.18   | 1 | 38    | 0.0014  | 1    | U | K.EDLAAFVEELDKVESQER.E                             |
| <a href="#">10068</a> | 1187 - 1204 | 1054.0133 | 2106.0121 | 2106.0117 | 0.20   | 1 | 79    | 1.9e-07 | 1    | U | K.EDLAAFVEELDKVESQER.E                             |
| <a href="#">10069</a> | 1187 - 1204 | 703.0113  | 2106.0121 | 2106.0117 | 0.23   | 1 | 45    | 0.00028 | 1    | U | K.EDLAAFVEELDKVESQER.E                             |
| <a href="#">10070</a> | 1187 - 1204 | 703.0114  | 2106.0124 | 2106.0117 | 0.37   | 1 | 30    | 0.031   | 1    | U | K.EDLAAFVEELDKVESQER.E                             |
| <a href="#">10071</a> | 1187 - 1204 | 703.0115  | 2106.0126 | 2106.0117 | 0.44   | 1 | 35    | 0.0047  | 1    | U | K.EDLAAFVEELDKVESQER.E                             |
| <a href="#">10072</a> | 1187 - 1204 | 1054.0137 | 2106.0128 | 2106.0117 | 0.53   | 1 | 62    | 9.3e-06 | 1    | U | K.EDLAAFVEELDKVESQER.E                             |
| <a href="#">10073</a> | 1187 - 1204 | 1054.0137 | 2106.0128 | 2106.0117 | 0.54   | 1 | 64    | 3.1e-06 | 1    | U | K.EDLAAFVEELDKVESQER.E                             |
| <a href="#">10074</a> | 1187 - 1204 | 1054.0138 | 2106.0130 | 2106.0117 | 0.63   | 1 | 53    | 7.3e-05 | 1    | U | K.EDLAAFVEELDKVESQER.E                             |
| <a href="#">10075</a> | 1187 - 1204 | 703.0117  | 2106.0132 | 2106.0117 | 0.74   | 1 | 33    | 0.0055  | 1    | U | K.EDLAAFVEELDKVESQER.E                             |
| <a href="#">10076</a> | 1187 - 1204 | 1054.0145 | 2106.0145 | 2106.0117 | 1.33   | 1 | 48    | 8.9e-05 | 1    | U | K.EDLAAFVEELDKVESQER.E                             |
| <a href="#">10077</a> | 1187 - 1204 | 1054.0146 | 2106.0147 | 2106.0117 | 1.46   | 1 | 60    | 2.2e-05 | 1    | U | K.EDLAAFVEELDKVESQER.E                             |
| <a href="#">10078</a> | 1187 - 1204 | 1054.0148 | 2106.0150 | 2106.0117 | 1.61   | 1 | 50    | 9.2e-05 | 1    | U | K.EDLAAFVEELDKVESQER.E                             |
| <a href="#">10079</a> | 1187 - 1204 | 1054.0151 | 2106.0156 | 2106.0117 | 1.86   | 1 | 61    | 8.7e-06 | 1    | U | K.EDLAAFVEELDKVESQER.E                             |
| <a href="#">10080</a> | 1187 - 1204 | 1054.0155 | 2106.0164 | 2106.0117 | 2.25   | 1 | 50    | 7e-05   | 1    | U | K.EDLAAFVEELDKVESQER.E                             |
| <a href="#">12593</a> | 1187 - 1214 | 1032.1676 | 3093.4809 | 3093.4812 | -0.089 | 2 | 65    | 1.5e-05 | 1    | U | K.EDLAAFVEELDKVESQEREDVLGMSGK.A                    |
| <a href="#">12595</a> | 1187 - 1214 | 1032.1683 | 3093.4831 | 3093.4812 | 0.62   | 2 | 46    | 0.0012  | 1    | U | K.EDLAAFVEELDKVESQEREDVLGMSGK.A                    |
| <a href="#">12635</a> | 1187 - 1214 | 1037.4983 | 3109.4730 | 3109.4761 | -0.99  | 2 | 47    | 0.00062 | 1    | U | K.EDLAAFVEELDKVESQEREDVLGMSGK.A<br>+ Oxidation (M) |
| <a href="#">12636</a> | 1187 - 1214 | 1037.4988 | 3109.4746 | 3109.4761 | -0.48  | 2 | 43    | 0.0016  | 1    | U | K.EDLAAFVEELDKVESQEREDVLGMSGK.A<br>+ Oxidation (M) |
| <a href="#">12637</a> | 1187 - 1214 | 1037.4989 | 3109.4748 | 3109.4761 | -0.42  | 2 | 38    | 0.0013  | 1    | U | K.EDLAAFVEELDKVESQEREDVLGMSGK.A<br>+ Oxidation (M) |
| <a href="#">12640</a> | 1187 - 1214 | 1037.4994 | 3109.4763 | 3109.4761 | 0.067  | 2 | 56    | 3.7e-05 | 1    | U | K.EDLAAFVEELDKVESQEREDVLGMSGK.A<br>+ Oxidation (M) |
| <a href="#">12644</a> | 1187 - 1214 | 1037.5003 | 3109.4790 | 3109.4761 | 0.94   | 2 | 44    | 0.00084 | 1    | U | K.EDLAAFVEELDKVESQEREDVLGMSGK.A<br>+ Oxidation (M) |
| <a href="#">7846</a>  | 1199 - 1214 | 867.9198  | 1733.8251 | 1733.8254 | -0.14  | 1 | 59    | 1.9e-05 | 1    | U | K.VESQEREDVLGMSGK.A                                |
| <a href="#">7847</a>  | 1199 - 1214 | 578.9490  | 1733.8253 | 1733.8254 | -0.042 | 1 | 36    | 0.015   | 1    | U | K.VESQEREDVLGMSGK.A                                |
| <a href="#">7991</a>  | 1199 - 1214 | 875.9174  | 1749.8202 | 1749.8203 | -0.037 | 1 | 75    | 4.8e-07 | 1    | U | K.VESQEREDVLGMSGK.A<br>+ Oxidation (M)             |
| <a href="#">7992</a>  | 1199 - 1214 | 584.2808  | 1749.8206 | 1749.8203 | 0.17   | 1 | 33    | 0.0026  | 1    | U | K.VESQEREDVLGMSGK.A<br>+ Oxidation (M)             |
| <a href="#">7994</a>  | 1199 - 1214 | 875.9178  | 1749.8210 | 1749.8203 | 0.37   | 1 | 63    | 1.7e-05 | 1    | U | K.VESQEREDVLGMSGK.A<br>+ Oxidation (M)             |
| <a href="#">1552</a>  | 1205 - 1214 | 503.7474  | 1005.4803 | 1005.4801 | 0.20   | 0 | 60    | 1.6e-05 | 1    | U | R.EDVLGMSGK.A                                      |
| <a href="#">1668</a>  | 1205 - 1214 | 511.7444  | 1021.4742 | 1021.4750 | -0.74  | 0 | 54    | 9.6e-05 | 1    | U | R.EDVLGMSGK.A<br>+ Oxidation (M)                   |
| <a href="#">1669</a>  | 1205 - 1214 | 511.7445  | 1021.4745 | 1021.4750 | -0.51  | 0 | 51    | 0.00012 | 1    | U | R.EDVLGMSGK.A<br>+ Oxidation (M)                   |
| <a href="#">1670</a>  | 1205 - 1214 | 511.7448  | 1021.4750 | 1021.4750 | 0.0020 | 0 | 47    | 0.0004  | 1    | U | R.EDVLGMSGK.A<br>+ Oxidation (M)                   |
| <a href="#">1671</a>  | 1205 - 1214 | 511.7448  | 1021.4751 | 1021.4750 | 0.061  | 0 | 50    | 0.00021 | 1    | U | R.EDVLGMSGK.A<br>+ Oxidation (M)                   |
| <a href="#">1672</a>  | 1205 - 1214 | 511.7448  | 1021.4751 | 1021.4750 | 0.12   | 0 | 60    | 2.6e-05 | 1    | U | R.EDVLGMSGK.A<br>+ Oxidation (M)                   |
| <a href="#">1673</a>  | 1205 - 1214 | 511.7449  | 1021.4753 | 1021.4750 | 0.32   | 0 | 58    | 3.6e-05 | 1    | U | R.EDVLGMSGK.A<br>+ Oxidation (M)                   |
| <a href="#">1674</a>  | 1205 - 1214 | 511.7451  | 1021.4756 | 1021.4750 | 0.55   | 0 | 47    | 0.00041 | 1    | U | R.EDVLGMSGK.A<br>+ Oxidation (M)                   |
| <a href="#">7110</a>  | 1227 - 1240 | 824.9215  | 1647.8284 | 1647.8290 | -0.38  | 1 | 88    | 3.4e-08 | 1    | U | K.KLQLEETMPSYGR.R                                  |
| <a href="#">7207</a>  | 1227 - 1240 | 832.9187  | 1663.8229 | 1663.8239 | -0.61  | 1 | 76    | 1.7e-07 | 1    | U | K.KLQLEETMPSYGR.R<br>+ Oxidation (M)               |
| <a href="#">7208</a>  | 1227 - 1240 | 832.9190  | 1663.8234 | 1663.8239 | -0.30  | 1 | 60    | 5.1e-06 | 1    | U | K.KLQLEETMPSYGR.R<br>+ Oxidation (M)               |
| <a href="#">7209</a>  | 1227 - 1240 | 555.6151  | 1663.8236 | 1663.8239 | -0.22  | 1 | 31    | 0.004   | 1    | U | K.KLQLEETMPSYGR.R<br>+ Oxidation (M)               |
| <a href="#">7210</a>  | 1227 - 1240 | 555.6152  | 1663.8236 | 1663.8239 | -0.18  | 1 | 31    | 0.0057  | 1    | U | K.KLQLEETMPSYGR.R<br>+ Oxidation (M)               |
| <a href="#">7211</a>  | 1227 - 1240 | 555.6152  | 1663.8237 | 1663.8239 | -0.11  | 1 | 17    | 0.036   | 1    | U | K.KLQLEETMPSYGR.R<br>+ Oxidation (M)               |
| <a href="#">7212</a>  | 1227 - 1240 | 832.9192  | 1663.8238 | 1663.8239 | -0.073 | 1 | 47    | 0.00012 | 1    | U | K.KLQLEETMPSYGR.R<br>+ Oxidation (M)               |
| <a href="#">7213</a>  | 1227 - 1240 | 832.9192  | 1663.8239 | 1663.8239 | -0.037 | 1 | 76    | 2.2e-07 | 1    | U | K.KLQLEETMPSYGR.R                                  |

| Query                 | Start - End | Observed  | Mr (expt) | Mr (calc) | ppm      | M | Score | Expect  | Rank | U | Peptide                                                  |
|-----------------------|-------------|-----------|-----------|-----------|----------|---|-------|---------|------|---|----------------------------------------------------------|
| <a href="#">7214</a>  | 1227 - 1240 | 555.6152  | 1663.8239 | 1663.8239 | -0.022   | 1 | 32    | 0.0029  | 1    | 1 | + Oxidation (M)<br>K.KLQLEETMPSYGR.R                     |
| <a href="#">7215</a>  | 1227 - 1240 | 832.9192  | 1663.8239 | 1663.8239 | -0.00060 | 1 | 46    | 0.00015 | 1    | 1 | + Oxidation (M)<br>K.KLQLEETMPSYGR.R                     |
| <a href="#">7216</a>  | 1227 - 1240 | 832.9193  | 1663.8241 | 1663.8239 | 0.084    | 1 | 76    | 2.7e-07 | 1    | 1 | + Oxidation (M)<br>K.KLQLEETMPSYGR.R                     |
| <a href="#">7217</a>  | 1227 - 1240 | 555.6154  | 1663.8243 | 1663.8239 | 0.23     | 1 | 28    | 0.0071  | 1    | 1 | + Oxidation (M)<br>K.KLQLEETMPSYGR.R                     |
| <a href="#">7218</a>  | 1227 - 1240 | 832.9199  | 1663.8253 | 1663.8239 | 0.84     | 1 | 76    | 1.9e-07 | 1    | 1 | + Oxidation (M)<br>K.KLQLEETMPSYGR.R                     |
| <a href="#">7219</a>  | 1227 - 1240 | 832.9205  | 1663.8264 | 1663.8239 | 1.47     | 1 | 71    | 4.6e-07 | 1    | 1 | + Oxidation (M)<br>K.KLQLEETMPSYGR.R                     |
| <a href="#">5883</a>  | 1228 - 1240 | 760.8738  | 1519.7330 | 1519.7341 | -0.66    | 0 | 60    | 1e-05   | 1    | 1 | K.LQLEETMPSYGR.R                                         |
| <a href="#">5885</a>  | 1228 - 1240 | 760.8743  | 1519.7340 | 1519.7341 | -0.044   | 0 | 68    | 1.3e-06 | 1    | 1 | K.LQLEETMPSYGR.R                                         |
| <a href="#">6104</a>  | 1228 - 1240 | 768.8713  | 1535.7281 | 1535.7290 | -0.55    | 0 | 66    | 1.4e-06 | 1    | 1 | + Oxidation (M)<br>K.LQLEETMPSYGR.R                      |
| <a href="#">6105</a>  | 1228 - 1240 | 768.8716  | 1535.7287 | 1535.7290 | -0.15    | 0 | 67    | 1.2e-06 | 1    | 1 | + Oxidation (M)<br>K.LQLEETMPSYGR.R                      |
| <a href="#">6106</a>  | 1228 - 1240 | 768.8717  | 1535.7289 | 1535.7290 | -0.068   | 0 | 58    | 2e-05   | 1    | 1 | + Oxidation (M)<br>K.LQLEETMPSYGR.R                      |
| <a href="#">6107</a>  | 1228 - 1240 | 768.8719  | 1535.7292 | 1535.7290 | 0.18     | 0 | 61    | 1.1e-05 | 1    | 1 | + Oxidation (M)<br>K.LQLEETMPSYGR.R                      |
| <a href="#">6108</a>  | 1228 - 1240 | 768.8720  | 1535.7294 | 1535.7290 | 0.27     | 0 | 62    | 6.5e-06 | 1    | 1 | + Oxidation (M)<br>K.LQLEETMPSYGR.R                      |
| <a href="#">3021</a>  | 1241 - 1250 | 586.3470  | 1170.6794 | 1170.6794 | -0.051   | 1 | 34    | 0.0023  | 1    | 1 | R.RIPEITAMK.A                                            |
| <a href="#">3022</a>  | 1241 - 1250 | 391.2337  | 1170.6794 | 1170.6794 | -0.031   | 1 | 36    | 0.0017  | 1    | 1 | R.RIPEITAMK.A                                            |
| <a href="#">3023</a>  | 1241 - 1250 | 586.3471  | 1170.6796 | 1170.6794 | 0.19     | 1 | 41    | 0.00098 | 1    | 1 | R.RIPEITAMK.A                                            |
| <a href="#">3131</a>  | 1241 - 1250 | 594.3438  | 1186.6731 | 1186.6743 | -1.06    | 1 | 26    | 0.044   | 1    | 1 | + Oxidation (M)<br>R.RIPEITAMK.A                         |
| <a href="#">3132</a>  | 1241 - 1250 | 396.5652  | 1186.6738 | 1186.6743 | -0.46    | 1 | 26    | 0.008   | 1    | 1 | + Oxidation (M)<br>R.RIPEITAMK.A                         |
| <a href="#">3133</a>  | 1241 - 1250 | 594.3443  | 1186.6740 | 1186.6743 | -0.32    | 1 | 37    | 0.0022  | 1    | 1 | + Oxidation (M)<br>R.RIPEITAMK.A                         |
| <a href="#">3134</a>  | 1241 - 1250 | 594.3445  | 1186.6745 | 1186.6743 | 0.10     | 1 | 31    | 0.007   | 1    | 1 | + Oxidation (M)<br>R.RIPEITAMK.A                         |
| <a href="#">3135</a>  | 1241 - 1250 | 396.5654  | 1186.6745 | 1186.6743 | 0.15     | 1 | 16    | 0.042   | 1    | 1 | + Oxidation (M)<br>R.RIPEITAMK.A                         |
| <a href="#">3136</a>  | 1241 - 1250 | 396.5655  | 1186.6746 | 1186.6743 | 0.25     | 1 | 25    | 0.027   | 1    | 1 | + Oxidation (M)<br>R.RIPEITAMK.A                         |
| <a href="#">3137</a>  | 1241 - 1250 | 594.3446  | 1186.6747 | 1186.6743 | 0.34     | 1 | 36    | 0.00075 | 1    | 1 | + Oxidation (M)<br>R.RIPEITAMK.A                         |
| <a href="#">3138</a>  | 1241 - 1250 | 594.3448  | 1186.6750 | 1186.6743 | 0.56     | 1 | 49    | 5.5e-05 | 1    | 1 | + Oxidation (M)<br>R.RIPEITAMK.A                         |
| <a href="#">1622</a>  | 1242 - 1250 | 508.2967  | 1014.5788 | 1014.5783 | 0.50     | 0 | 58    | 6.9e-05 | 1    | 1 | R.IIPEITAMK.A                                            |
| <a href="#">2786</a>  | 1261 - 1271 | 573.3293  | 1144.6440 | 1144.6452 | -0.98    | 2 | 57    | 5.2e-05 | 1    | 1 | U.K.KGDLDTAAVK.V                                         |
| <a href="#">2788</a>  | 1261 - 1271 | 382.5558  | 1144.6455 | 1144.6452 | 0.32     | 2 | 30    | 0.022   | 1    | 1 | U.K.KGDLDTAAVK.V                                         |
| <a href="#">1640</a>  | 1262 - 1271 | 509.2822  | 1016.5499 | 1016.5502 | -0.30    | 1 | 36    | 0.015   | 1    | 1 | U.K.KGDLDTAAVK.V                                         |
| <a href="#">1641</a>  | 1262 - 1271 | 509.2824  | 1016.5503 | 1016.5502 | 0.11     | 1 | 65    | 1.7e-05 | 1    | 1 | U.K.KGDLDTAAVK.V                                         |
| <a href="#">1642</a>  | 1262 - 1271 | 509.2825  | 1016.5504 | 1016.5502 | 0.15     | 1 | 43    | 0.0031  | 1    | 1 | U.K.KGDLDTAAVK.V                                         |
| <a href="#">1643</a>  | 1262 - 1271 | 509.2825  | 1016.5504 | 1016.5502 | 0.23     | 1 | 42    | 0.0034  | 1    | 1 | U.K.KGDLDTAAVK.V                                         |
| <a href="#">824</a>   | 1263 - 1271 | 445.2350  | 888.4554  | 888.4553  | 0.14     | 0 | 34    | 0.022   | 1    | 1 | U.K.GDLDTAAVK.V                                          |
| <a href="#">13694</a> | 1263 - 1299 | 947.9651  | 3787.8312 | 3787.8316 | -0.10    | 1 | 50    | 0.00019 | 1    | 1 | U.K.GDLDTAAVKVEFDEEFGAPVEGAGEEALTPSPVPINK.G              |
| <a href="#">12101</a> | 1272 - 1299 | 973.4688  | 2917.3844 | 2917.3869 | -0.85    | 0 | 42    | 0.00079 | 1    | 1 | U.K.VEFDEEFGAPVEGAGEEALTPSPVPINK.G                       |
| <a href="#">12104</a> | 1272 - 1299 | 973.4692  | 2917.3858 | 2917.3869 | -0.37    | 0 | 33    | 0.0028  | 1    | 1 | U.K.VEFDEEFGAPVEGAGEEALTPSPVPINK.G                       |
| <a href="#">12108</a> | 1272 - 1299 | 973.4695  | 2917.3866 | 2917.3869 | -0.099   | 0 | 49    | 0.0014  | 1    | 1 | U.K.VEFDEEFGAPVEGAGEEALTPSPVPINK.G                       |
| <a href="#">12109</a> | 1272 - 1299 | 973.4696  | 2917.3869 | 2917.3869 | 0.0034   | 0 | 25    | 0.012   | 1    | 1 | U.K.VEFDEEFGAPVEGAGEEALTPSPVPINK.G                       |
| <a href="#">12111</a> | 1272 - 1299 | 973.4698  | 2917.3875 | 2917.3869 | 0.21     | 0 | 34    | 0.0035  | 1    | 1 | U.K.VEFDEEFGAPVEGAGEEALTPSPVPINK.G                       |
| <a href="#">12112</a> | 1272 - 1299 | 730.3542  | 2917.3875 | 2917.3869 | 0.22     | 0 | 52    | 0.00027 | 1    | 1 | U.K.VEFDEEFGAPVEGAGEEALTPSPVPINK.G                       |
| <a href="#">12113</a> | 1272 - 1299 | 973.4699  | 2917.3878 | 2917.3869 | 0.30     | 0 | 38    | 0.0045  | 1    | 1 | U.K.VEFDEEFGAPVEGAGEEALTPSPVPINK.G                       |
| <a href="#">12117</a> | 1272 - 1299 | 973.4702  | 2917.3889 | 2917.3869 | 0.67     | 0 | 51    | 0.00015 | 1    | 1 | U.K.VEFDEEFGAPVEGAGEEALTPSPVPINK.G                       |
| <a href="#">12119</a> | 1272 - 1299 | 973.4703  | 2917.3892 | 2917.3869 | 0.77     | 0 | 28    | 0.014   | 1    | 1 | U.K.VEFDEEFGAPVEGAGEEALTPSPVPINK.G                       |
| <a href="#">12123</a> | 1272 - 1299 | 973.4713  | 2917.3920 | 2917.3869 | 1.73     | 0 | 25    | 0.016   | 1    | 1 | U.K.VEFDEEFGAPVEGAGEEALTPSPVPINK.G                       |
| <a href="#">12124</a> | 1272 - 1299 | 973.4717  | 2917.3932 | 2917.3869 | 2.14     | 0 | 33    | 0.0038  | 1    | 1 | U.K.VEFDEEFGAPVEGAGEEALTPSPVPINK.G                       |
| <a href="#">5935</a>  | 1314 - 1327 | 508.6026  | 1522.7859 | 1522.7868 | -0.61    | 2 | 23    | 0.022   | 1    | 1 | R.VRKTPTSSGKPSAK.K<br>+ Phospho (ST)                     |
| <a href="#">3150</a>  | 1316 - 1327 | 594.8326  | 1187.6506 | 1187.6510 | -0.34    | 1 | 42    | 0.0017  | 1    | 1 | U.R.KTPTSSGKPSAK.K                                       |
| <a href="#">3151</a>  | 1316 - 1327 | 396.8908  | 1187.6506 | 1187.6510 | -0.30    | 1 | 27    | 0.04    | 1    | 1 | U.R.KTPTSSGKPSAK.K                                       |
| <a href="#">3156</a>  | 1316 - 1327 | 396.8910  | 1187.6511 | 1187.6510 | 0.13     | 1 | 26    | 0.027   | 1    | 1 | U.R.KTPTSSGKPSAK.K                                       |
| <a href="#">3157</a>  | 1316 - 1327 | 594.8329  | 1187.6512 | 1187.6510 | 0.20     | 1 | 53    | 0.00032 | 1    | 1 | U.R.KTPTSSGKPSAK.K                                       |
| <a href="#">3158</a>  | 1316 - 1327 | 594.8330  | 1187.6514 | 1187.6510 | 0.32     | 1 | 53    | 6.2e-05 | 1    | 1 | U.R.KTPTSSGKPSAK.K                                       |
| <a href="#">1982</a>  | 1317 - 1327 | 354.1925  | 1059.5556 | 1059.5560 | -0.39    | 0 | 26    | 0.0098  | 1    | 1 | U.K.TPTSSGKPSAK.K                                        |
| <a href="#">1983</a>  | 1317 - 1327 | 530.7851  | 1059.5557 | 1059.5560 | -0.34    | 0 | 41    | 0.00073 | 1    | 1 | U.K.TPTSSGKPSAK.K                                        |
| <a href="#">1984</a>  | 1317 - 1327 | 530.7851  | 1059.5557 | 1059.5560 | -0.32    | 0 | 32    | 0.003   | 1    | 1 | U.K.TPTSSGKPSAK.K                                        |
| <a href="#">1985</a>  | 1317 - 1327 | 530.7853  | 1059.5561 | 1059.5560 | 0.074    | 0 | 28    | 0.0063  | 1    | 1 | U.K.TPTSSGKPSAK.K                                        |
| <a href="#">1986</a>  | 1317 - 1327 | 354.1927  | 1059.5562 | 1059.5560 | 0.12     | 0 | 37    | 0.0051  | 1    | 1 | U.K.TPTSSGKPSAK.K                                        |
| <a href="#">12094</a> | 1332 - 1356 | 729.3480  | 2913.3627 | 2913.3628 | -0.020   | 2 | 43    | 0.0011  | 1    | 1 | U.K.RNPWSDDESKSESLEETEPEVVIPIR.D                         |
| <a href="#">12095</a> | 1332 - 1356 | 972.1285  | 2913.3637 | 2913.3628 | 0.32     | 2 | 71    | 1.4e-06 | 1    | 1 | U.K.RNPWSDDESKSESLEETEPEVVIPIR.D                         |
| <a href="#">12096</a> | 1332 - 1356 | 972.1285  | 2913.3637 | 2913.3628 | 0.32     | 2 | 74    | 6.1e-07 | 1    | 1 | U.K.RNPWSDDESKSESLEETEPEVVIPIR.D                         |
| <a href="#">2130</a>  | 1333 - 1341 | 539.2279  | 1076.4413 | 1076.4411 | 0.24     | 0 | 39    | 0.00061 | 1    | 1 | U.R.NPWSDDSK.S                                           |
| <a href="#">11809</a> | 1333 - 1356 | 920.0942  | 2757.2609 | 2757.2617 | -0.30    | 1 | 41    | 0.0015  | 1    | 1 | U.R.NPWSDDSKSESLEETEPEVVIPIR.D                           |
| <a href="#">11810</a> | 1333 - 1356 | 920.0943  | 2757.2611 | 2757.2617 | -0.20    | 1 | 57    | 0.00027 | 1    | 1 | U.R.NPWSDDSKSESLEETEPEVVIPIR.D                           |
| <a href="#">7540</a>  | 1342 - 1356 | 850.4230  | 1698.8315 | 1698.8312 | 0.16     | 0 | 63    | 4.4e-05 | 1    | 1 | U.K.SESDLEETEPEVVIPIR.D                                  |
| <a href="#">145</a>   | 1363 - 1369 | 371.7138  | 741.4131  | 741.4133  | -0.31    | 0 | 33    | 0.0027  | 1    | 1 | U.R.AAAERPK.Y                                            |
| <a href="#">12930</a> | 1370 - 1396 | 1076.7351 | 3227.1835 | 3227.1858 | -0.73    | 0 | 29    | 0.0051  | 1    | 1 | U.K.YTFDFSEEDDADDDDDNDLEELK.V                            |
| <a href="#">10905</a> | 1397 - 1418 | 805.0310  | 2412.0713 | 2412.0734 | -0.87    | 1 | 35    | 0.0022  | 1    | 1 | U.K.VKASPIITNDGEDEFVPSDGLDK.D<br>+ Phospho (ST)          |
| <a href="#">10906</a> | 1397 - 1418 | 805.0313  | 2412.0720 | 2412.0734 | -0.57    | 1 | 35    | 0.013   | 1    | 1 | U.K.VKASPIITNDGEDEFVPSDGLDK.D<br>+ Phospho (ST)          |
| <a href="#">13320</a> | 1397 - 1427 | 860.1351  | 3436.5112 | 3436.5236 | -3.60    | 2 | 30    | 0.0084  | 1    | 1 | U.K.VKASPIITNDGEDEFVPSDGLDKDEYTFSPGK.S<br>+ Phospho (ST) |
| <a href="#">13321</a> | 1397 - 1427 | 1146.5135 | 3436.5188 | 3436.5236 | -1.39    | 2 | 46    | 0.0012  | 1    | 1 | U.K.VKASPIITNDGEDEFVPSDGLDKDEYTFSPGK.S<br>+ Phospho (ST) |
| <a href="#">13322</a> | 1397 - 1427 | 1146.5139 | 3436.5198 | 3436.5236 | -1.10    | 2 | 78    | 8e-07   | 1    | 1 | U.K.VKASPIITNDGEDEFVPSDGLDKDEYTFSPGK.S<br>+ Phospho (ST) |

| Query                 | Start - End | Observed  | Mr (expt) | Mr (calc) | ppm    | M | Score | Expect  | Rank | U | Peptide                                             |
|-----------------------|-------------|-----------|-----------|-----------|--------|---|-------|---------|------|---|-----------------------------------------------------|
| <a href="#">13323</a> | 1397 - 1427 | 860.1379  | 3436.5224 | 3436.5236 | -0.34  | 2 | 58    | 7.2e-05 | 1    | U | K.VKASPIITNDGEDEFVPSDGLDKDEYTFSPGK.S + Phospho (ST) |
| <a href="#">13324</a> | 1397 - 1427 | 860.1381  | 3436.5232 | 3436.5236 | -0.11  | 2 | 56    | 0.00023 | 1    | U | K.VKASPIITNDGEDEFVPSDGLDKDEYTFSPGK.S + Phospho (ST) |
| <a href="#">13325</a> | 1397 - 1427 | 1146.5150 | 3436.5232 | 3436.5236 | -0.095 | 2 | 61    | 3.5e-05 | 1    | U | K.VKASPIITNDGEDEFVPSDGLDKDEYTFSPGK.S + Phospho (ST) |
| <a href="#">13326</a> | 1397 - 1427 | 1146.5157 | 3436.5252 | 3436.5236 | 0.49   | 2 | 79    | 1.3e-06 | 1    | U | K.VKASPIITNDGEDEFVPSDGLDKDEYTFSPGK.S + Phospho (ST) |
| <a href="#">10044</a> | 1399 - 1418 | 1053.4786 | 2104.9426 | 2104.9437 | -0.50  | 0 | 96    | 1.1e-08 | 1    | U | K.ASPIITNDGEDEFVPSDGLDK.D                           |
| <a href="#">12703</a> | 1399 - 1427 | 1044.1382 | 3129.3929 | 3129.3939 | -0.32  | 1 | 85    | 1.6e-07 | 1    | U | K.ASPIITNDGEDEFVPSDGLDKDEYTFSPGK.S                  |
| <a href="#">12704</a> | 1399 - 1427 | 1044.1389 | 3129.3949 | 3129.3939 | 0.33   | 1 | 69    | 5.1e-06 | 1    | U | K.ASPIITNDGEDEFVPSDGLDKDEYTFSPGK.S                  |
| <a href="#">12705</a> | 1399 - 1427 | 1044.1393 | 3129.3960 | 3129.3939 | 0.69   | 1 | 76    | 1.2e-06 | 1    | U | K.ASPIITNDGEDEFVPSDGLDKDEYTFSPGK.S                  |
| <a href="#">12706</a> | 1399 - 1427 | 1044.1393 | 3129.3962 | 3129.3939 | 0.75   | 1 | 78    | 2.8e-07 | 1    | U | K.ASPIITNDGEDEFVPSDGLDKDEYTFSPGK.S                  |
| <a href="#">12707</a> | 1399 - 1427 | 783.3565  | 3129.3968 | 3129.3939 | 0.93   | 1 | 37    | 0.012   | 1    | U | K.ASPIITNDGEDEFVPSDGLDKDEYTFSPGK.S                  |
| <a href="#">12897</a> | 1399 - 1427 | 1070.7928 | 3209.3567 | 3209.3602 | -1.09  | 1 | 35    | 0.009   | 1    | U | K.ASPIITNDGEDEFVPSDGLDKDEYTFSPGK.S + Phospho (ST)   |
| <a href="#">12898</a> | 1399 - 1427 | 1070.7932 | 3209.3578 | 3209.3602 | -0.74  | 1 | 79    | 4.3e-07 | 1    | U | K.ASPIITNDGEDEFVPSDGLDKDEYTFSPGK.S + Phospho (ST)   |
| <a href="#">1825</a>  | 1419 - 1427 | 522.2374  | 1042.4603 | 1042.4607 | -0.45  | 0 | 35    | 0.0045  | 1    | U | K.DEYTFSPGK.S                                       |
| <a href="#">9568</a>  | 1440 - 1456 | 990.4787  | 1978.9428 | 1978.9425 | 0.18   | 1 | 90    | 1.7e-08 | 1    | U | K.KSQDFGNLFSFSPYSQK.S                               |
| <a href="#">830</a>   | 1441 - 1456 | 926.4302  | 1850.8459 | 1850.8475 | -0.90  | 0 | 18    | 0.019   | 1    | U | K.SQDFGNLFSFSPYSQK.S                                |
| <a href="#">8833</a>  | 1441 - 1456 | 926.4304  | 1850.8463 | 1850.8475 | -0.67  | 0 | 55    | 1.1e-05 | 1    | U | K.KSQDFGNLFSFSPYSQK.S                               |
| <a href="#">8834</a>  | 1441 - 1456 | 926.4306  | 1850.8466 | 1850.8475 | -0.50  | 0 | 93    | 5.1e-09 | 1    | U | K.KSQDFGNLFSFSPYSQK.S                               |
| <a href="#">8835</a>  | 1441 - 1456 | 926.4307  | 1850.8469 | 1850.8475 | -0.35  | 0 | 42    | 0.00011 | 1    | U | K.KSQDFGNLFSFSPYSQK.S                               |
| <a href="#">8836</a>  | 1441 - 1456 | 617.9564  | 1850.8473 | 1850.8475 | -0.15  | 0 | 26    | 0.031   | 1    | U | K.KSQDFGNLFSFSPYSQK.S                               |
| <a href="#">8837</a>  | 1441 - 1456 | 926.4310  | 1850.8475 | 1850.8475 | -0.025 | 0 | 60    | 5.8e-06 | 1    | U | K.KSQDFGNLFSFSPYSQK.S                               |
| <a href="#">8838</a>  | 1441 - 1456 | 926.4311  | 1850.8477 | 1850.8475 | 0.094  | 0 | 79    | 9.9e-08 | 1    | U | K.KSQDFGNLFSFSPYSQK.S                               |
| <a href="#">8839</a>  | 1441 - 1456 | 617.9565  | 1850.8478 | 1850.8475 | 0.14   | 0 | 38    | 0.0011  | 1    | U | K.KSQDFGNLFSFSPYSQK.S                               |
| <a href="#">8840</a>  | 1441 - 1456 | 617.9566  | 1850.8478 | 1850.8475 | 0.16   | 0 | 56    | 0.00012 | 1    | U | K.KSQDFGNLFSFSPYSQK.S                               |
| <a href="#">8842</a>  | 1441 - 1456 | 926.4313  | 1850.8481 | 1850.8475 | 0.30   | 0 | 74    | 1.2e-07 | 1    | U | K.KSQDFGNLFSFSPYSQK.S                               |
| <a href="#">8843</a>  | 1441 - 1456 | 617.9567  | 1850.8482 | 1850.8475 | 0.37   | 0 | 31    | 0.0042  | 1    | U | K.KSQDFGNLFSFSPYSQK.S                               |
| <a href="#">8844</a>  | 1441 - 1456 | 926.4316  | 1850.8486 | 1850.8475 | 0.57   | 0 | 86    | 2.2e-08 | 1    | U | K.KSQDFGNLFSFSPYSQK.S                               |
| <a href="#">8845</a>  | 1441 - 1456 | 926.4319  | 1850.8493 | 1850.8475 | 0.95   | 0 | 78    | 2.1e-07 | 1    | U | K.KSQDFGNLFSFSPYSQK.S                               |
| <a href="#">8846</a>  | 1441 - 1456 | 926.4319  | 1850.8493 | 1850.8475 | 0.95   | 0 | 62    | 2e-06   | 1    | U | K.KSQDFGNLFSFSPYSQK.S                               |
| <a href="#">8847</a>  | 1441 - 1456 | 926.4320  | 1850.8495 | 1850.8475 | 1.08   | 0 | 29    | 0.015   | 1    | U | K.KSQDFGNLFSFSPYSQK.S                               |
| <a href="#">8848</a>  | 1441 - 1456 | 926.4325  | 1850.8505 | 1850.8475 | 1.59   | 0 | 62    | 1.6e-06 | 1    | U | K.KSQDFGNLFSFSPYSQK.S                               |
| <a href="#">11863</a> | 1457 - 1482 | 932.4094  | 2794.2063 | 2794.2093 | -1.09  | 1 | 42    | 0.0034  | 1    | U | K.SEDDSAKFDSNEEDSASVFSFSGLK.Q                       |
| <a href="#">11866</a> | 1457 - 1482 | 932.4099  | 2794.2078 | 2794.2093 | -0.57  | 1 | 56    | 5.3e-05 | 1    | U | K.SEDDSAKFDSNEEDSASVFSFSGLK.Q                       |
| <a href="#">11868</a> | 1457 - 1482 | 932.4100  | 2794.2080 | 2794.2093 | -0.47  | 1 | 30    | 0.0077  | 1    | U | K.SEDDSAKFDSNEEDSASVFSFSGLK.Q                       |
| <a href="#">11869</a> | 1457 - 1482 | 932.4102  | 2794.2088 | 2794.2093 | -0.19  | 1 | 52    | 8.7e-05 | 1    | U | K.SEDDSAKFDSNEEDSASVFSFSGLK.Q                       |
| <a href="#">11870</a> | 1457 - 1482 | 699.5596  | 2794.2092 | 2794.2093 | -0.057 | 1 | 30    | 0.018   | 1    | U | K.SEDDSAKFDSNEEDSASVFSFSGLK.Q                       |
| <a href="#">11871</a> | 1457 - 1482 | 932.4104  | 2794.2094 | 2794.2093 | 0.013  | 1 | 75    | 1.5e-06 | 1    | U | K.SEDDSAKFDSNEEDSASVFSFSGLK.Q                       |
| <a href="#">11873</a> | 1457 - 1482 | 932.4108  | 2794.2105 | 2794.2093 | 0.41   | 1 | 41    | 0.0011  | 1    | U | K.SEDDSAKFDSNEEDSASVFSFSGLK.Q                       |
| <a href="#">11874</a> | 1457 - 1482 | 932.4110  | 2794.2112 | 2794.2093 | 0.68   | 1 | 87    | 1.1e-07 | 1    | U | K.SEDDSAKFDSNEEDSASVFSFSGLK.Q                       |
| <a href="#">11876</a> | 1457 - 1482 | 932.4114  | 2794.2124 | 2794.2093 | 1.11   | 1 | 45    | 0.00036 | 1    | U | K.SEDDSAKFDSNEEDSASVFSFSGLK.Q                       |
| <a href="#">12048</a> | 1457 - 1482 | 959.0650  | 2874.1732 | 2874.1757 | -0.87  | 1 | 29    | 0.018   | 1    | U | K.SEDDSAKFDSNEEDSASVFSFSGLK.Q + Phospho (ST)        |
| <a href="#">12049</a> | 1457 - 1482 | 959.0655  | 2874.1746 | 2874.1757 | -0.39  | 1 | 43    | 0.0025  | 1    | U | K.SEDDSAKFDSNEEDSASVFSFSGLK.Q + Phospho (ST)        |
| <a href="#">9858</a>  | 1464 - 1482 | 1031.9638 | 2061.9129 | 2061.9167 | -1.84  | 0 | 79    | 2.1e-07 | 1    | U | K.FDSNEEDSASVFSFSGLK.Q                              |
| <a href="#">9859</a>  | 1464 - 1482 | 1031.9640 | 2061.9134 | 2061.9167 | -1.61  | 0 | 35    | 0.0066  | 1    | U | K.FDSNEEDSASVFSFSGLK.Q                              |
| <a href="#">9861</a>  | 1464 - 1482 | 1031.9642 | 2061.9139 | 2061.9167 | -1.36  | 0 | 25    | 0.019   | 1    | U | K.FDSNEEDSASVFSFSGLK.Q                              |
| <a href="#">9862</a>  | 1464 - 1482 | 1031.9648 | 2061.9151 | 2061.9167 | -0.77  | 0 | 76    | 3.3e-07 | 1    | U | K.FDSNEEDSASVFSFSGLK.Q                              |
| <a href="#">9865</a>  | 1464 - 1482 | 1031.9651 | 2061.9156 | 2061.9167 | -0.54  | 0 | 105   | 2.3e-09 | 1    | U | K.FDSNEEDSASVFSFSGLK.Q                              |
| <a href="#">9866</a>  | 1464 - 1482 | 1031.9651 | 2061.9156 | 2061.9167 | -0.53  | 0 | 22    | 0.013   | 1    | U | K.FDSNEEDSASVFSFSGLK.Q                              |
| <a href="#">9867</a>  | 1464 - 1482 | 1031.9652 | 2061.9158 | 2061.9167 | -0.46  | 0 | 68    | 2.9e-06 | 1    | U | K.FDSNEEDSASVFSFSGLK.Q                              |
| <a href="#">9868</a>  | 1464 - 1482 | 1031.9652 | 2061.9159 | 2061.9167 | -0.39  | 0 | 25    | 0.011   | 1    | U | K.FDSNEEDSASVFSFSGLK.Q                              |
| <a href="#">9870</a>  | 1464 - 1482 | 1031.9654 | 2061.9162 | 2061.9167 | -0.25  | 0 | 83    | 1.6e-08 | 1    | U | K.FDSNEEDSASVFSFSGLK.Q                              |
| <a href="#">9871</a>  | 1464 - 1482 | 1031.9654 | 2061.9163 | 2061.9167 | -0.21  | 0 | 73    | 5e-07   | 1    | U | K.FDSNEEDSASVFSFSGLK.Q                              |
| <a href="#">9872</a>  | 1464 - 1482 | 1031.9654 | 2061.9163 | 2061.9167 | -0.20  | 0 | 53    | 0.00023 | 1    | U | K.FDSNEEDSASVFSFSGLK.Q                              |
| <a href="#">9873</a>  | 1464 - 1482 | 1031.9656 | 2061.9165 | 2061.9167 | -0.090 | 0 | 59    | 7.9e-06 | 1    | U | K.FDSNEEDSASVFSFSGLK.Q                              |
| <a href="#">9874</a>  | 1464 - 1482 | 688.3128  | 2061.9166 | 2061.9167 | -0.078 | 0 | 28    | 0.015   | 1    | U | K.FDSNEEDSASVFSFSGLK.Q                              |
| <a href="#">9875</a>  | 1464 - 1482 | 688.3128  | 2061.9166 | 2061.9167 | -0.064 | 0 | 40    | 0.0045  | 1    | U | K.FDSNEEDSASVFSFSGLK.Q                              |
| <a href="#">9876</a>  | 1464 - 1482 | 1031.9657 | 2061.9168 | 2061.9167 | 0.036  | 0 | 51    | 4e-05   | 1    | U | K.FDSNEEDSASVFSFSGLK.Q                              |
| <a href="#">9877</a>  | 1464 - 1482 | 1031.9657 | 2061.9168 | 2061.9167 | 0.046  | 0 | 36    | 0.0023  | 1    | U | K.FDSNEEDSASVFSFSGLK.Q                              |
| <a href="#">9878</a>  | 1464 - 1482 | 1031.9657 | 2061.9168 | 2061.9167 | 0.056  | 0 | 105   | 5.5e-10 | 1    | U | K.FDSNEEDSASVFSFSGLK.Q                              |
| <a href="#">9879</a>  | 1464 - 1482 | 688.3130  | 2061.9170 | 2061.9167 | 0.14   | 0 | 26    | 0.0074  | 1    | U | K.FDSNEEDSASVFSFSGLK.Q                              |
| <a href="#">9880</a>  | 1464 - 1482 | 1031.9660 | 2061.9175 | 2061.9167 | 0.37   | 0 | 52    | 4.1e-05 | 1    | U | K.FDSNEEDSASVFSFSGLK.Q                              |
| <a href="#">9882</a>  | 1464 - 1482 | 1031.9661 | 2061.9176 | 2061.9167 | 0.43   | 0 | 55    | 9e-05   | 1    | U | K.FDSNEEDSASVFSFSGLK.Q                              |
| <a href="#">9883</a>  | 1464 - 1482 | 688.3132  | 2061.9179 | 2061.9167 | 0.56   | 0 | 21    | 0.037   | 1    | U | K.FDSNEEDSASVFSFSGLK.Q                              |
| <a href="#">9884</a>  | 1464 - 1482 | 1031.9663 | 2061.9180 | 2061.9167 | 0.63   | 0 | 27    | 0.0065  | 1    | U | K.FDSNEEDSASVFSFSGLK.Q                              |
| <a href="#">9885</a>  | 1464 - 1482 | 1031.9667 | 2061.9189 | 2061.9167 | 1.05   | 0 | 29    | 0.0082  | 1    | U | K.FDSNEEDSASVFSFSGLK.Q                              |
| <a href="#">9886</a>  | 1464 - 1482 | 1031.9667 | 2061.9189 | 2061.9167 | 1.05   | 0 | 59    | 7e-05   | 1    | U | K.FDSNEEDSASVFSFSGLK.Q                              |
| <a href="#">9887</a>  | 1464 - 1482 | 1031.9673 | 2061.9200 | 2061.9167 | 1.60   | 0 | 27    | 0.0097  | 1    | U | K.FDSNEEDSASVFSFSGLK.Q                              |
| <a href="#">10176</a> | 1464 - 1482 | 1071.9475 | 2141.8804 | 2141.8831 | -1.24  | 0 | 57    | 2.2e-05 | 1    | U | K.FDSNEEDSASVFSFSGLK.Q + Phospho (ST)               |
| <a href="#">10177</a> | 1464 - 1482 | 1071.9480 | 2141.8814 | 2141.8831 | -0.79  | 0 | 68    | 2.8e-06 | 1    | U | K.FDSNEEDSASVFSFSGLK.Q + Phospho (ST)               |
| <a href="#">10178</a> | 1464 - 1482 | 1071.9485 | 2141.8824 | 2141.8831 | -0.29  | 0 | 60    | 8.3e-06 | 1    | U | K.FDSNEEDSASVFSFSGLK.Q + Phospho (ST)               |
| <a href="#">4575</a>  | 1496 - 1508 | 456.9330  | 1367.7772 | 1367.7773 | -0.015 | 1 | 46    | 8.4e-05 | 1    | U | K.GKPPSSDTVPKPK.R                                   |
| <a href="#">4576</a>  | 1496 - 1508 | 684.8961  | 1367.7776 | 1367.7773 | 0.25   | 1 | 40    | 0.0015  | 1    | U | K.GKPPSSDTVPKPK.R                                   |
| <a href="#">4577</a>  | 1496 - 1508 | 456.9332  | 1367.7778 | 1367.7773 | 0.40   | 1 | 26    | 0.007   | 1    | U | K.GKPPSSDTVPKPK.R                                   |
| <a href="#">3530</a>  | 1497 - 1508 | 414.2345  | 1239.6817 | 1239.6823 | -0.48  | 0 | 27    | 0.016   | 1    | U | K.GKPPSSDTVPKPK.R                                   |
| <a href="#">3534</a>  | 1497 - 1508 | 620.8484  | 1239.6823 | 1239.6823 | -0.023 | 0 | 33    | 0.0012  | 1    | U | K.GKPPSSDTVPKPK.R                                   |
| <a href="#">3535</a>  | 1497 - 1508 | 414.2348  | 1239.6827 | 1239.6823 | 0.29   | 0 | 24    | 0.022   | 1    | U | K.GKPPSSDTVPKPK.R                                   |
| <a href="#">3536</a>  | 1497 - 1508 | 414.2349  | 1239.6828 | 1239.6823 | 0.44   | 0 | 39    | 0.003   | 1    | U | K.GKPPSSDTVPKPK.R                                   |
| <a href="#">4238</a>  | 1497 - 1508 | 440.8899  | 1319.6479 | 1319.6486 | -0.54  | 0 | 36    | 0.0063  | 1    | U | K.GKPPSSDTVPKPK.R + Phospho (ST)                    |
| <a href="#">4239</a>  | 1497 - 1508 | 440.8900  | 1319.6481 | 1319.6486 | -0.41  | 0 | 29    | 0.0091  | 1    | U | K.GKPPSSDTVPKPK.R + Phospho (ST)                    |
| <a href="#">9284</a>  | 1515 - 1532 | 640.9894  | 1919.9464 | 1919.9476 | -0.64  | 1 | 24    | 0.019   | 1    | U | K.KVVEAVNSDSEFGIPK.K                                |
| <a href="#">9285</a>  | 1515 - 1532 | 640.9895  | 1919.9467 |           |        |   |       |         |      |   |                                                     |

| Query                 | Start - End | Observed  | Mr (expt) | Mr (calc) | ppm    | M | Score | Expect  | Rank | U | Peptide                                |
|-----------------------|-------------|-----------|-----------|-----------|--------|---|-------|---------|------|---|----------------------------------------|
| <a href="#">9619</a>  | 1515 - 1532 | 667.6450  | 1999.9131 | 1999.9140 | -0.45  | 1 | 27    | 0.026   | 1    | U | K.KVVEAVNSDSDSEFGIPK.K + Phospho (ST)  |
| <a href="#">9621</a>  | 1515 - 1532 | 1000.9647 | 1999.9148 | 1999.9140 | 0.41   | 1 | 46    | 0.0018  | 1    | U | K.KVVEAVNSDSDSEFGIPK.K + Phospho (ST)  |
| <a href="#">9622</a>  | 1515 - 1532 | 1000.9647 | 1999.9149 | 1999.9140 | 0.47   | 1 | 48    | 7.6e-05 | 1    | U | K.KVVEAVNSDSDSEFGIPK.K + Phospho (ST)  |
| <a href="#">9623</a>  | 1515 - 1532 | 667.6456  | 1999.9150 | 1999.9140 | 0.51   | 1 | 36    | 0.0047  | 1    | U | K.KVVEAVNSDSDSEFGIPK.K + Phospho (ST)  |
| <a href="#">9624</a>  | 1515 - 1532 | 667.6465  | 1999.9176 | 1999.9140 | 1.83   | 1 | 23    | 0.043   | 1    | U | K.KVVEAVNSDSDSEFGIPK.K + Phospho (ST)  |
| <a href="#">8347</a>  | 1516 - 1532 | 896.9336  | 1791.8525 | 1791.8527 | -0.071 | 0 | 70    | 3.8e-07 | 1    | U | K.VVEAVNSDSDSEFGIPK.K                  |
| <a href="#">8348</a>  | 1516 - 1532 | 896.9341  | 1791.8536 | 1791.8527 | 0.51   | 0 | 65    | 2.5e-06 | 1    | U | K.VVEAVNSDSDSEFGIPK.K                  |
| <a href="#">8946</a>  | 1516 - 1532 | 936.9156  | 1871.8166 | 1871.8190 | -1.28  | 0 | 60    | 9.6e-06 | 1    | U | K.VVEAVNSDSDSEFGIPK.K + Phospho (ST)   |
| <a href="#">8947</a>  | 1516 - 1532 | 936.9170  | 1871.8195 | 1871.8190 | 0.28   | 0 | 71    | 1.4e-06 | 1    | U | K.VVEAVNSDSDSEFGIPK.K + Phospho (ST)   |
| <a href="#">8579</a>  | 1547 - 1562 | 606.2584  | 1815.7533 | 1815.7537 | -0.23  | 2 | 54    | 0.0003  | 1    | U | K.RKASGSENEGDYNPGR.K + Phospho (ST)    |
| <a href="#">9408</a>  | 1547 - 1563 | 648.9568  | 1943.8484 | 1943.8486 | -0.11  | 3 | 34    | 0.0065  | 1    | U | K.RKASGSENEGDYNPGRK.T + Phospho (ST)   |
| <a href="#">6557</a>  | 1548 - 1562 | 527.5688  | 1579.6847 | 1579.6862 | -0.99  | 1 | 40    | 0.001   | 1    | U | R.KASGSENEGDYNPGR.K                    |
| <a href="#">6559</a>  | 1548 - 1562 | 790.8503  | 1579.6860 | 1579.6862 | -0.18  | 1 | 35    | 0.0018  | 1    | U | R.KASGSENEGDYNPGR.K                    |
| <a href="#">7185</a>  | 1548 - 1562 | 830.8333  | 1659.6520 | 1659.6526 | -0.32  | 1 | 32    | 0.002   | 1    | U | R.KASGSENEGDYNPGR.K + Phospho (ST)     |
| <a href="#">7187</a>  | 1548 - 1562 | 830.8342  | 1659.6538 | 1659.6526 | 0.72   | 1 | 45    | 0.00017 | 1    | U | R.KASGSENEGDYNPGR.K + Phospho (ST)     |
| <a href="#">7188</a>  | 1548 - 1562 | 554.2253  | 1659.6541 | 1659.6526 | 0.92   | 1 | 39    | 0.00094 | 1    | U | R.KASGSENEGDYNPGR.K + Phospho (ST)     |
| <a href="#">7893</a>  | 1548 - 1562 | 870.8167  | 1739.6189 | 1739.6189 | 0.0069 | 1 | 27    | 0.005   | 1    | U | R.KASGSENEGDYNPGR.K + 2 Phospho (ST)   |
| <a href="#">7894</a>  | 1548 - 1562 | 870.8172  | 1739.6199 | 1739.6189 | 0.57   | 1 | 36    | 0.0017  | 1    | U | R.KASGSENEGDYNPGR.K + 2 Phospho (ST)   |
| <a href="#">7895</a>  | 1548 - 1562 | 870.8175  | 1739.6204 | 1739.6189 | 0.85   | 1 | 30    | 0.021   | 1    | U | R.KASGSENEGDYNPGR.K + 2 Phospho (ST)   |
| <a href="#">7600</a>  | 1548 - 1563 | 570.2678  | 1707.7816 | 1707.7812 | 0.23   | 2 | 53    | 7.6e-05 | 1    | U | R.KASGSENEGDYNPGRK.T                   |
| <a href="#">7601</a>  | 1548 - 1563 | 854.8982  | 1707.7819 | 1707.7812 | 0.41   | 2 | 59    | 2.1e-05 | 1    | U | R.KASGSENEGDYNPGRK.T                   |
| <a href="#">7602</a>  | 1548 - 1563 | 854.8999  | 1707.7853 | 1707.7812 | 2.41   | 2 | 46    | 0.00017 | 1    | U | R.KASGSENEGDYNPGRK.T                   |
| <a href="#">8275</a>  | 1548 - 1563 | 894.8809  | 1787.7473 | 1787.7475 | -0.15  | 2 | 34    | 0.0037  | 1    | U | R.KASGSENEGDYNPGRK.T + Phospho (ST)    |
| <a href="#">8276</a>  | 1548 - 1563 | 596.9233  | 1787.7480 | 1787.7475 | 0.25   | 2 | 43    | 0.00087 | 1    | U | R.KASGSENEGDYNPGRK.T + Phospho (ST)    |
| <a href="#">5178</a>  | 1549 - 1562 | 726.8020  | 1451.5894 | 1451.5913 | -1.31  | 0 | 44    | 0.00047 | 1    | U | K.ASGSENEGDYNPGR.K                     |
| <a href="#">5179</a>  | 1549 - 1562 | 726.8028  | 1451.5910 | 1451.5913 | -0.20  | 0 | 40    | 0.0012  | 1    | U | K.ASGSENEGDYNPGR.K                     |
| <a href="#">5180</a>  | 1549 - 1562 | 726.8029  | 1451.5912 | 1451.5913 | -0.045 | 0 | 40    | 0.0004  | 1    | U | K.ASGSENEGDYNPGR.K                     |
| <a href="#">5181</a>  | 1549 - 1562 | 484.8715  | 1451.5927 | 1451.5913 | 0.97   | 0 | 44    | 0.0008  | 1    | U | K.ASGSENEGDYNPGR.K                     |
| <a href="#">6077</a>  | 1549 - 1562 | 766.7861  | 1531.5576 | 1531.5576 | -0.032 | 0 | 51    | 0.0002  | 1    | U | K.ASGSENEGDYNPGR.K + Phospho (ST)      |
| <a href="#">6078</a>  | 1549 - 1562 | 766.7861  | 1531.5577 | 1531.5576 | 0.033  | 0 | 55    | 0.0001  | 1    | U | K.ASGSENEGDYNPGR.K + Phospho (ST)      |
| <a href="#">6079</a>  | 1549 - 1562 | 766.7863  | 1531.5581 | 1531.5576 | 0.29   | 0 | 38    | 0.0016  | 1    | U | K.ASGSENEGDYNPGR.K + Phospho (ST)      |
| <a href="#">6080</a>  | 1549 - 1562 | 766.7867  | 1531.5589 | 1531.5576 | 0.86   | 0 | 54    | 3.1e-05 | 1    | U | K.ASGSENEGDYNPGR.K + Phospho (ST)      |
| <a href="#">6561</a>  | 1549 - 1563 | 790.8504  | 1579.6862 | 1579.6862 | -0.051 | 1 | 59    | 5.6e-05 | 1    | U | K.ASGSENEGDYNPGRK.T                    |
| <a href="#">7184</a>  | 1549 - 1563 | 830.8330  | 1659.6513 | 1659.6526 | -0.74  | 1 | 39    | 0.0012  | 1    | U | K.ASGSENEGDYNPGRK.T + Phospho (ST)     |
| <a href="#">7186</a>  | 1549 - 1563 | 554.2250  | 1659.6531 | 1659.6526 | 0.29   | 1 | 26    | 0.0064  | 1    | U | K.ASGSENEGDYNPGRK.T + Phospho (ST)     |
| <a href="#">12179</a> | 1574 - 1599 | 979.7966  | 2936.3680 | 2936.3716 | -1.23  | 1 | 26    | 0.017   | 1    | U | K.KTSFDQSDVDIFPSDFPTEPPSLPR.T          |
| <a href="#">12180</a> | 1574 - 1599 | 979.7966  | 2936.3681 | 2936.3716 | -1.20  | 1 | 25    | 0.033   | 1    | U | K.KTSFDQSDVDIFPSDFPTEPPSLPR.T          |
| <a href="#">12183</a> | 1574 - 1599 | 979.7969  | 2936.3688 | 2936.3716 | -0.98  | 1 | 21    | 0.028   | 1    | U | K.KTSFDQSDVDIFPSDFPTEPPSLPR.T          |
| <a href="#">12185</a> | 1574 - 1599 | 979.7971  | 2936.3696 | 2936.3716 | -0.69  | 1 | 39    | 0.0035  | 1    | U | K.KTSFDQSDVDIFPSDFPTEPPSLPR.T          |
| <a href="#">12186</a> | 1574 - 1599 | 979.7972  | 2936.3697 | 2936.3716 | -0.65  | 1 | 44    | 0.0023  | 1    | U | K.KTSFDQSDVDIFPSDFPTEPPSLPR.T          |
| <a href="#">12188</a> | 1574 - 1599 | 979.7974  | 2936.3703 | 2936.3716 | -0.46  | 1 | 29    | 0.018   | 1    | U | K.KTSFDQSDVDIFPSDFPTEPPSLPR.T          |
| <a href="#">12191</a> | 1574 - 1599 | 979.7980  | 2936.3721 | 2936.3716 | 0.15   | 1 | 50    | 0.00014 | 1    | U | K.KTSFDQSDVDIFPSDFPTEPPSLPR.T          |
| <a href="#">12193</a> | 1574 - 1599 | 979.7988  | 2936.3746 | 2936.3716 | 1.00   | 1 | 35    | 0.0067  | 1    | U | K.KTSFDQSDVDIFPSDFPTEPPSLPR.T          |
| <a href="#">12194</a> | 1574 - 1599 | 735.1012  | 2936.3755 | 2936.3716 | 1.32   | 1 | 37    | 0.022   | 1    | U | K.KTSFDQSDVDIFPSDFPTEPPSLPR.T          |
| <a href="#">11927</a> | 1575 - 1599 | 937.1001  | 2808.2784 | 2808.2767 | 0.61   | 0 | 21    | 0.042   | 1    | U | K.TSFDQSDVDIFPSDFPTEPPSLPR.T           |
| <a href="#">11928</a> | 1575 - 1599 | 937.1002  | 2808.2788 | 2808.2767 | 0.75   | 0 | 28    | 0.045   | 1    | U | K.TSFDQSDVDIFPSDFPTEPPSLPR.T           |
| <a href="#">10265</a> | 1609 - 1626 | 1086.9138 | 2171.8131 | 2171.8154 | -1.03  | 0 | 36    | 0.0013  | 1    | U | K.YFAESDEEEDVDVFAMFN.-                 |
| <a href="#">10268</a> | 1609 - 1626 | 1086.9141 | 2171.8136 | 2171.8154 | -0.81  | 0 | 18    | 0.022   | 1    | U | K.YFAESDEEEDVDVFAMFN.-                 |
| <a href="#">10273</a> | 1609 - 1626 | 1086.9148 | 2171.8150 | 2171.8154 | -0.18  | 0 | 32    | 0.0012  | 1    | U | K.YFAESDEEEDVDVFAMFN.-                 |
| <a href="#">10326</a> | 1609 - 1626 | 1094.9114 | 2187.8082 | 2187.8103 | -0.93  | 0 | 53    | 3.4e-05 | 1    | U | K.YFAESDEEEDVDVFAMFN.- + Oxidation (M) |
| <a href="#">10327</a> | 1609 - 1626 | 1094.9120 | 2187.8095 | 2187.8103 | -0.34  | 0 | 40    | 0.00025 | 1    | U | K.YFAESDEEEDVDVFAMFN.- + Oxidation (M) |
| <a href="#">10328</a> | 1609 - 1626 | 1094.9122 | 2187.8098 | 2187.8103 | -0.21  | 0 | 55    | 1.1e-05 | 1    | U | K.YFAESDEEEDVDVFAMFN.- + Oxidation (M) |
| <a href="#">10330</a> | 1609 - 1626 | 1094.9122 | 2187.8099 | 2187.8103 | -0.16  | 0 | 55    | 7.3e-06 | 1    | U | K.YFAESDEEEDVDVFAMFN.- + Oxidation (M) |
| <a href="#">10331</a> | 1609 - 1626 | 1094.9124 | 2187.8102 | 2187.8103 | -0.038 | 0 | 55    | 9.5e-06 | 1    | U | K.YFAESDEEEDVDVFAMFN.- + Oxidation (M) |
| <a href="#">10332</a> | 1609 - 1626 | 1094.9125 | 2187.8104 | 2187.8103 | 0.053  | 0 | 44    | 0.00011 | 1    | U | K.YFAESDEEEDVDVFAMFN.- + Oxidation (M) |

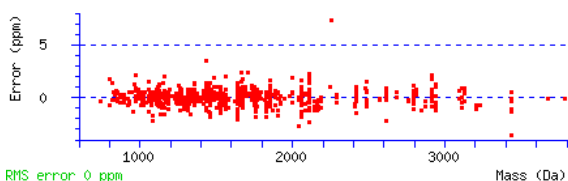



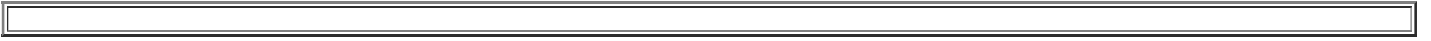

Supplement: 41467_2023_44089_MOESM4_ESM.pdf [file 41467_2023_44089_MOESM4_ESM.pdf]
