# Supplementary material for: ERK2-topoisomerase II regulatory axis is important for gene activation in immediate early genes
Source: Springer Nature journal article supplement (doi:10.1038/s41467-023-44089-y), 2023-12-14

# MASCOT Search Results

## Protein View: Q02880

DNA topoisomerase 2-beta OS=Homo sapiens OX=9606 GN=TOP2B PE=1 SV=3

Database: Uniprot\_Proteome\_Human  
Score: 20719  
Monoisotopic mass (M<sub>r</sub>): 184122  
Calculated pI: 8.14

Sequence similarity is available as [an NCBI BLAST search of Q02880 against nr](#).

### Search parameters

MS data file: File Name: Z:\SN22\SN221363\_deTOP2B\_Erk1\_lu1.raw; File Path: ; File Time: 3/1/2023 9:56:14 AM; File Size: 347522226 [Byte]  
Enzyme: Trypsin: cuts C-term side of KR unless next residue is P.  
Fixed modifications: **Carbamidomethyl (C)**.  
Variable modifications: **Acetyl (Protein N-term), Oxidation (M), Phospho (ST), Phospho (Y)**.

### Protein sequence coverage: 65%

Matched peptides shown in **bold red**.

```
1  MAKSGGCGAG  AGVGGNGAL  TWVTLFDQNN  AAKKEESETA  NKNDSSKLS
51  VERVYQKKTQ  LEHILLRPDT  YIGSVEPLTQ  FMWVYDEVDG  MNCREVTFVP
101 GLYKIFDEIL  VNAADNKQRD  KNMTCIKVSI  DPESNIISIW  NNGKGIPVVE
151 HKVEKVVVPA  LIFGQLLTSS  NYDDDEKKVT  GGRNGYGAKL  CNIFSTKFTV
201 ETACKKEYKHS  FKQTMWNMM  KTSEAKIKHF  DGEDYTCITF  QPDLSPFKME
251 KLDRDIVALM  TRRAYDLAGS  CRGVKVMFNG  KKLVPVNGFRS  YVDLYVKDKL
301 DETVALKVI  HELANERWDV  CLTLSEKGFQ  QISFVNSIAT  TKGGRHVDYV
351 VDQVVGLKIE  VVKKKNKAGV  SVKPFQVKNH  IWVFINCLIE  NPTFDSQTKE
401 NMTLPKPSFG  SKCQLSEKFF  KAASNCGIVE  SILNWVKFKA  QTQLNKKCSS
451 VKYSKIKGIP  KLDDANDAGG  KHSLECTLIL  TEGDSAKSLA  VSGLGVIGRD
501 RYGVFPLRGK  ILNVREASHK  QIMENAEINN  IIKIVGLQYK  KSYDDAESLK
551 TLRYGKIMIM  TDQDQDGSHI  KGLLINFIIH  NWPSLLKHGF  LEEFITPIVK
601 ASKNKQELSF  YSIPEFDEWK  KHIEHQKAWK  IKYYKGLGTS  TAKEAKEYFA
651 DMERHRILFR  YAGPEDDAAI  TLAFSKKKID  DRKEWLTNFM  EDRRQRLHGG
701 LPEQFLYGTA  TKHLYNDFI  NKELILFSNS  DNERSIPLSV  DGFKPGQRKV
751 LFTCFKRNDR  REVKVAQLAG  SVAEMSAYHH  GEQALMMTIV  NLAQNFVGSN
801 NINLLQPIGQ  FGTRLHGGKD  AASPRYIFTM  LSTLARLLFP  AVDDNLLKFL
851 YDDNQVVEPE  WYIPIPMVL  INGAEIGITG  WACKLPNYDA  REIVNNVRRM
901 LDGLDPPHML  PNYKNFKGTI  QELGQNYAV  SGEIFVVDNR  TVEITELPVR
951 TWTQVYKEQV  LEPMLNGTDK  TPALISDYKE  YHTDTTVKFV  VKMTEEKLAQ
1001 AEAAGLHKVF  KLQTLTLCNS  MVLFDHMGC  KKYETVQDIL  KEFFDLRLSY
1051 YGLRKEWLVG  MLGAESTKLN  NQARFILEKI  QGKITIENRS  KKDLIQMLVQ
1101 RGYESDPVKA  WKEAQEKAAE  EDETQNHDD  SSSDSGTPSG  PDFNYILNMS
1151 LWSLTKEKVE  ELIKQRDAKG  REVNDLKRKS  PSDLWKEDLA  AFVEELDKVE
1201 SQEREDVLAG  MSGKAIKGKV  GKPKVKLQL  EETMPSYGR  RIPEITAMK
1251 ADASKLLKK  KGDLDTAAV  KVEFDEEFSG  APVEGAGEEA  LTPSPVINKG
1301 PKPKREKKEP  GTRVRKTPTS  SGKPSAKVK  KRNPSWDES  KESDLEETE
1351 VPVLPRDSL  RRAAAERPKY  TDFSEEDD  DADDDDDNN  DLEELKVKAS
1401 PITNDGEDEF  VPSDGLDKDE  YTFSPGSKA  TPEKSLHDK  SQDFGNLFSF
1451 PSYSQSEDD  SAKFDSNEED  SASVSPSPG  LKQTDKVPK  TVAAKKGKPS
1501 SDTVPKKRA  PKQKKVEAV  NSDSSEFGI  PKKTTPKGK  GRGAKKRKAS
1551 GSENEGDYNP  GRKTSKTTSK  KPKKTSFDQD  SDVDIFPSDF  PTEPPSLPRT
1601 GRARKEVKYF  AESDEEDDV  DFAMFN
```

Unformatted sequence string: **1626 residues** (for pasting into other applications).

Sort by  residue number  increasing mass  decreasing mass  
Show  matched peptides only  predicted peptides also

| Query                | Start - End | Observed | Mr (expt) | Mr (calc) | ppm    | M | Score | Expect  | Rank | U | Peptide            |
|----------------------|-------------|----------|-----------|-----------|--------|---|-------|---------|------|---|--------------------|
| <a href="#">1783</a> | 34 - 42     | 518.2516 | 1034.4885 | 1034.4880 | 0.55   | 1 | 39    | 0.0078  | 1    | U | K.KEESETANK.N      |
| <a href="#">6329</a> | 34 - 47     | 783.8656 | 1565.7166 | 1565.7169 | -0.17  | 2 | 41    | 0.00034 | 1    | U | K.KEESETANKNDSSK.K |
| <a href="#">6330</a> | 34 - 47     | 522.9129 | 1565.7168 | 1565.7169 | -0.068 | 2 | 31    | 0.04    | 1    | U | K.KEESETANKNDSSK.K |
| <a href="#">6332</a> | 34 - 47     | 783.8659 | 1565.7172 | 1565.7169 | 0.24   | 2 | 43    | 0.00024 | 1    | U | K.KEESETANKNDSSK.K |
| <a href="#">6333</a> | 34 - 47     | 783.8659 | 1565.7173 | 1565.7169 | 0.29   | 2 | 34    | 0.0075  | 1    | U | K.KEESETANKNDSSK.K |
| <a href="#">7336</a> | 34 - 48     | 565.6114 | 1693.8123 | 1693.8118 | 0.26   | 3 | 31    | 0.007   | 1    | U | K.KEESETANKNDSSK.L |
| <a href="#">7337</a> | 34 - 48     | 847.9137 | 1693.8129 | 1693.8118 | 0.65   | 3 | 38    | 0.0021  | 1    | U | K.KEESETANKNDSSK.L |
| <a href="#">2831</a> | 95 - 104    | 576.8188 | 1151.6230 | 1151.6227 | 0.26   | 0 | 18    | 0.026   | 1    |   | R.EVTFVPGLYK.I     |
| <a href="#">5188</a> | 105 - 117   | 731.3816 | 1460.7487 | 1460.7511 | -1.64  | 0 | 50    | 0.00082 | 1    |   | K.IFDEILVNAADNK.Q  |
| <a href="#">5189</a> | 105 - 117   | 487.9235 | 1460.7487 | 1460.7511 | -1.63  | 0 | 46    | 0.00048 | 1    |   | K.IFDEILVNAADNK.Q  |
| <a href="#">5190</a> | 105 - 117   | 731.3822 | 1460.7498 | 1460.7511 | -0.90  | 0 | 90    | 8.3e-08 | 1    |   | K.IFDEILVNAADNK.Q  |
| <a href="#">5191</a> | 105 - 117   | 487.9240 | 1460.7500 | 1460.7511 | -0.73  | 0 | 27    | 0.021   | 1    |   | K.IFDEILVNAADNK.Q  |
| <a href="#">5193</a> | 105 - 117   | 731.3824 | 1460.7502 | 1460.7511 | -0.60  | 0 | 51    | 9.3e-05 | 1    |   | K.IFDEILVNAADNK.Q  |
| <a href="#">5195</a> | 105 - 117   | 487.9241 | 1460.7504 | 1460.7511 | -0.44  | 0 | 33    | 0.0079  | 1    |   | K.IFDEILVNAADNK.Q  |
| <a href="#">5196</a> | 105 - 117   | 487.9241 | 1460.7505 | 1460.7511 | -0.42  | 0 | 27    | 0.018   | 1    |   | K.IFDEILVNAADNK.Q  |
| <a href="#">5197</a> | 105 - 117   | 487.9241 | 1460.7505 | 1460.7511 | -0.40  | 0 | 27    | 0.028   | 1    |   | K.IFDEILVNAADNK.Q  |
| <a href="#">5198</a> | 105 - 117   | 487.9241 | 1460.7505 | 1460.7511 | -0.40  | 0 | 38    | 0.0026  | 1    |   | K.IFDEILVNAADNK.Q  |
| <a href="#">5199</a> | 105 - 117   | 731.3826 | 1460.7506 | 1460.7511 | -0.34  | 0 | 66    | 5.1e-06 | 1    |   | K.IFDEILVNAADNK.Q  |
| <a href="#">5200</a> | 105 - 117   | 487.9241 | 1460.7506 | 1460.7511 | -0.34  | 0 | 66    | 1.5e-05 | 1    |   | K.IFDEILVNAADNK.Q  |

| Query                 | Start - End | Observed  | Mr (expt) | Mr (calc) | ppm    | M | Score | Expect  | Rank | U   | Peptide                            |
|-----------------------|-------------|-----------|-----------|-----------|--------|---|-------|---------|------|-----|------------------------------------|
| <a href="#">5201</a>  | 105 - 117   | 487.9242  | 1460.7507 | 1460.7511 | -0.23  | 0 | 33    | 0.0047  | 1    | ... | K.IFDEILVNAADNK.Q                  |
| <a href="#">5202</a>  | 105 - 117   | 731.3827  | 1460.7508 | 1460.7511 | -0.16  | 0 | 74    | 1.7e-06 | 1    | ... | K.IFDEILVNAADNK.Q                  |
| <a href="#">5203</a>  | 105 - 117   | 487.9242  | 1460.7509 | 1460.7511 | -0.11  | 0 | 38    | 0.0034  | 1    | ... | K.IFDEILVNAADNK.Q                  |
| <a href="#">5204</a>  | 105 - 117   | 731.3828  | 1460.7509 | 1460.7511 | -0.092 | 0 | 58    | 2.1e-05 | 1    | ... | K.IFDEILVNAADNK.Q                  |
| <a href="#">5205</a>  | 105 - 117   | 487.9243  | 1460.7510 | 1460.7511 | -0.090 | 0 | 33    | 0.0085  | 1    | ... | K.IFDEILVNAADNK.Q                  |
| <a href="#">5206</a>  | 105 - 117   | 487.9243  | 1460.7510 | 1460.7511 | -0.069 | 0 | 39    | 0.0036  | 1    | ... | K.IFDEILVNAADNK.Q                  |
| <a href="#">5207</a>  | 105 - 117   | 731.3828  | 1460.7510 | 1460.7511 | -0.065 | 0 | 81    | 6e-07   | 1    | ... | K.IFDEILVNAADNK.Q                  |
| <a href="#">5208</a>  | 105 - 117   | 487.9243  | 1460.7510 | 1460.7511 | -0.049 | 0 | 29    | 0.012   | 1    | ... | K.IFDEILVNAADNK.Q                  |
| <a href="#">5209</a>  | 105 - 117   | 487.9243  | 1460.7511 | 1460.7511 | 0.034  | 0 | 27    | 0.028   | 1    | ... | K.IFDEILVNAADNK.Q                  |
| <a href="#">5210</a>  | 105 - 117   | 487.9244  | 1460.7513 | 1460.7511 | 0.12   | 0 | 35    | 0.0039  | 1    | ... | K.IFDEILVNAADNK.Q                  |
| <a href="#">5211</a>  | 105 - 117   | 487.9244  | 1460.7513 | 1460.7511 | 0.14   | 0 | 27    | 0.013   | 1    | ... | K.IFDEILVNAADNK.Q                  |
| <a href="#">5212</a>  | 105 - 117   | 731.3829  | 1460.7513 | 1460.7511 | 0.17   | 0 | 83    | 2.8e-07 | 1    | ... | K.IFDEILVNAADNK.Q                  |
| <a href="#">5213</a>  | 105 - 117   | 731.3830  | 1460.7513 | 1460.7511 | 0.18   | 0 | 83    | 1e-07   | 1    | ... | K.IFDEILVNAADNK.Q                  |
| <a href="#">5214</a>  | 105 - 117   | 731.3830  | 1460.7515 | 1460.7511 | 0.26   | 0 | 75    | 6.9e-07 | 1    | ... | K.IFDEILVNAADNK.Q                  |
| <a href="#">5215</a>  | 105 - 117   | 487.9245  | 1460.7517 | 1460.7511 | 0.42   | 0 | 32    | 0.0078  | 1    | ... | K.IFDEILVNAADNK.Q                  |
| <a href="#">5217</a>  | 105 - 117   | 731.3834  | 1460.7523 | 1460.7511 | 0.82   | 0 | 70    | 2.9e-06 | 1    | ... | K.IFDEILVNAADNK.Q                  |
| <a href="#">5218</a>  | 105 - 117   | 487.9248  | 1460.7525 | 1460.7511 | 0.96   | 0 | 61    | 3.1e-05 | 1    | ... | K.IFDEILVNAADNK.Q                  |
| <a href="#">5219</a>  | 105 - 117   | 731.3835  | 1460.7525 | 1460.7511 | 0.96   | 0 | 71    | 1.6e-06 | 1    | ... | K.IFDEILVNAADNK.Q                  |
| <a href="#">7742</a>  | 105 - 119   | 582.6440  | 1744.9102 | 1744.9108 | -0.31  | 1 | 28    | 0.016   | 1    | ... | K.IFDEILVNAADNKQR.D                |
| <a href="#">8763</a>  | 128 - 144   | 943.4867  | 1884.9589 | 1884.9581 | 0.42   | 0 | 73    | 7.4e-07 | 1    | U   | K.VSIDPESNIISIWNNGK.G              |
| <a href="#">8764</a>  | 128 - 144   | 943.4868  | 1884.9590 | 1884.9581 | 0.46   | 0 | 57    | 6.7e-06 | 1    | U   | K.VSIDPESNIISIWNNGK.G              |
| <a href="#">8765</a>  | 128 - 144   | 629.3272  | 1884.9597 | 1884.9581 | 0.82   | 0 | 56    | 5.6e-05 | 1    | U   | K.VSIDPESNIISIWNNGK.G              |
| <a href="#">11599</a> | 153 - 177   | 948.4836  | 2842.4291 | 2842.4276 | 0.52   | 1 | 34    | 0.0023  | 1    | U   | K.VEKVYVPALIFGQLLTSSNYDDDEK.K      |
| <a href="#">10836</a> | 156 - 177   | 829.7460  | 2486.2163 | 2486.2217 | -2.16  | 0 | 32    | 0.002   | 1    | U   | K.VYVPALIFGQLLTSSNYDDDEK.K         |
| <a href="#">10837</a> | 156 - 177   | 829.7467  | 2486.2182 | 2486.2217 | -1.42  | 0 | 30    | 0.0027  | 1    | U   | K.VYVPALIFGQLLTSSNYDDDEK.K         |
| <a href="#">10840</a> | 156 - 177   | 829.7480  | 2486.2222 | 2486.2217 | 0.21   | 0 | 35    | 0.0048  | 1    | U   | K.VYVPALIFGQLLTSSNYDDDEK.K         |
| <a href="#">10841</a> | 156 - 177   | 829.7481  | 2486.2224 | 2486.2217 | 0.27   | 0 | 32    | 0.008   | 1    | U   | K.VYVPALIFGQLLTSSNYDDDEK.K         |
| <a href="#">10842</a> | 156 - 177   | 1244.1186 | 2486.2226 | 2486.2217 | 0.37   | 0 | 80    | 6.4e-08 | 1    | U   | K.VYVPALIFGQLLTSSNYDDDEK.K         |
| <a href="#">10843</a> | 156 - 177   | 829.7482  | 2486.2227 | 2486.2217 | 0.42   | 0 | 59    | 1.2e-05 | 1    | U   | K.VYVPALIFGQLLTSSNYDDDEK.K         |
| <a href="#">10845</a> | 156 - 177   | 1244.1189 | 2486.2233 | 2486.2217 | 0.65   | 0 | 53    | 2.2e-05 | 1    | U   | K.VYVPALIFGQLLTSSNYDDDEK.K         |
| <a href="#">10846</a> | 156 - 177   | 1244.1191 | 2486.2236 | 2486.2217 | 0.78   | 0 | 62    | 4e-06   | 1    | U   | K.VYVPALIFGQLLTSSNYDDDEK.K         |
| <a href="#">10847</a> | 156 - 177   | 1244.1196 | 2486.2246 | 2486.2217 | 1.18   | 0 | 38    | 0.0067  | 1    | U   | K.VYVPALIFGQLLTSSNYDDDEK.K         |
| <a href="#">11116</a> | 156 - 178   | 872.4460  | 2614.3162 | 2614.3166 | -0.18  | 1 | 44    | 0.0016  | 1    | U   | K.VYVPALIFGQLLTSSNYDDDEK.V         |
| <a href="#">11117</a> | 156 - 178   | 654.5863  | 2614.3162 | 2614.3166 | -0.16  | 1 | 47    | 0.0025  | 1    | U   | K.VYVPALIFGQLLTSSNYDDDEK.V         |
| <a href="#">11118</a> | 156 - 178   | 872.4460  | 2614.3163 | 2614.3166 | -0.12  | 1 | 39    | 0.013   | 1    | U   | K.VYVPALIFGQLLTSSNYDDDEK.V         |
| <a href="#">11122</a> | 156 - 178   | 654.5866  | 2614.3171 | 2614.3166 | 0.19   | 1 | 26    | 0.049   | 1    | U   | K.VYVPALIFGQLLTSSNYDDDEK.V         |
| <a href="#">11123</a> | 156 - 178   | 654.5866  | 2614.3172 | 2614.3166 | 0.21   | 1 | 34    | 0.014   | 1    | U   | K.VYVPALIFGQLLTSSNYDDDEK.V         |
| <a href="#">11124</a> | 156 - 178   | 872.4464  | 2614.3172 | 2614.3166 | 0.22   | 1 | 55    | 0.00016 | 1    | U   | K.VYVPALIFGQLLTSSNYDDDEK.V         |
| <a href="#">11125</a> | 156 - 178   | 872.4464  | 2614.3173 | 2614.3166 | 0.24   | 1 | 42    | 0.0035  | 1    | U   | K.VYVPALIFGQLLTSSNYDDDEK.V         |
| <a href="#">11126</a> | 156 - 178   | 1308.1659 | 2614.3173 | 2614.3166 | 0.27   | 1 | 73    | 5.6e-06 | 1    | U   | K.VYVPALIFGQLLTSSNYDDDEK.V         |
| <a href="#">1392</a>  | 190 - 197   | 491.7552  | 981.4958  | 981.4953  | 0.45   | 0 | 49    | 0.00016 | 1    | U   | K.LCNIFSTK.F                       |
| <a href="#">1201</a>  | 198 - 205   | 478.2310  | 954.4475  | 954.4481  | -0.61  | 0 | 21    | 0.046   | 1    | U   | K.FVTEACK.E                        |
| <a href="#">3073</a>  | 213 - 221   | 592.2559  | 1182.4972 | 1182.4984 | -1.03  | 0 | 25    | 0.018   | 1    | U   | K.QTWMNNMMK.T                      |
| <a href="#">3180</a>  | 213 - 221   | 600.2537  | 1198.4928 | 1198.4933 | -0.41  | 0 | 31    | 0.0066  | 1    | U   | K.QTWMNNMMK.T<br>+ Oxidation (M)   |
| <a href="#">3181</a>  | 213 - 221   | 600.2539  | 1198.4932 | 1198.4933 | -0.61  | 0 | 28    | 0.038   | 1    | U   | K.QTWMNNMMK.T<br>+ Oxidation (M)   |
| <a href="#">3182</a>  | 213 - 221   | 600.2539  | 1198.4933 | 1198.4933 | -0.011 | 0 | 30    | 0.0059  | 1    | U   | K.QTWMNNMMK.T<br>+ Oxidation (M)   |
| <a href="#">3283</a>  | 213 - 221   | 608.2511  | 1214.4876 | 1214.4882 | -0.49  | 0 | 26    | 0.0062  | 1    | U   | K.QTWMNNMMK.T<br>+ 2 Oxidation (M) |
| <a href="#">9938</a>  | 229 - 246   | 724.9894  | 2171.9463 | 2171.9470 | -0.32  | 0 | 28    | 0.015   | 1    | U   | K.HFDGEDYTCITFQDLSK.F              |
| <a href="#">3795</a>  | 252 - 262   | 637.8592  | 1273.7038 | 1273.7064 | -2.06  | 1 | 50    | 0.00013 | 1    | U   | K.LDKDIVALMTR.R                    |
| <a href="#">3797</a>  | 252 - 262   | 425.5755  | 1273.7046 | 1273.7064 | -1.37  | 1 | 18    | 0.042   | 1    | U   | K.LDKDIVALMTR.R                    |
| <a href="#">3798</a>  | 252 - 262   | 637.8598  | 1273.7051 | 1273.7064 | -0.99  | 1 | 50    | 0.00025 | 1    | U   | K.LDKDIVALMTR.R                    |
| <a href="#">3799</a>  | 252 - 262   | 637.8599  | 1273.7052 | 1273.7064 | -0.90  | 1 | 35    | 0.0037  | 1    | U   | K.LDKDIVALMTR.R                    |
| <a href="#">3803</a>  | 252 - 262   | 637.8602  | 1273.7058 | 1273.7064 | -0.44  | 1 | 26    | 0.0041  | 1    | U   | K.LDKDIVALMTR.R                    |
| <a href="#">3806</a>  | 252 - 262   | 637.8604  | 1273.7061 | 1273.7064 | -0.19  | 1 | 46    | 0.00093 | 1    | U   | K.LDKDIVALMTR.R                    |
| <a href="#">3809</a>  | 252 - 262   | 637.8604  | 1273.7063 | 1273.7064 | -0.033 | 1 | 74    | 4.7e-07 | 1    | U   | K.LDKDIVALMTR.R                    |
| <a href="#">3811</a>  | 252 - 262   | 637.8605  | 1273.7064 | 1273.7064 | 0.030  | 1 | 48    | 0.00014 | 1    | U   | K.LDKDIVALMTR.R                    |
| <a href="#">3812</a>  | 252 - 262   | 637.8605  | 1273.7064 | 1273.7064 | 0.046  | 1 | 35    | 0.00078 | 1    | U   | K.LDKDIVALMTR.R                    |
| <a href="#">3813</a>  | 252 - 262   | 637.8607  | 1273.7068 | 1273.7064 | 0.34   | 1 | 30    | 0.0067  | 1    | U   | K.LDKDIVALMTR.R                    |
| <a href="#">3814</a>  | 252 - 262   | 637.8611  | 1273.7077 | 1273.7064 | 1.02   | 1 | 29    | 0.02    | 1    | U   | K.LDKDIVALMTR.R                    |
| <a href="#">3815</a>  | 252 - 262   | 637.8617  | 1273.7088 | 1273.7064 | 1.90   | 1 | 77    | 7.5e-07 | 1    | U   | K.LDKDIVALMTR.R                    |
| <a href="#">3816</a>  | 252 - 262   | 425.5771  | 1273.7094 | 1273.7064 | 2.37   | 1 | 35    | 0.013   | 1    | U   | K.LDKDIVALMTR.R                    |
| <a href="#">3929</a>  | 252 - 262   | 645.8572  | 1289.6998 | 1289.7013 | -1.18  | 1 | 38    | 0.0017  | 1    | U   | K.LDKDIVALMTR.R<br>+ Oxidation (M) |
| <a href="#">3930</a>  | 252 - 262   | 430.9072  | 1289.6998 | 1289.7013 | -1.17  | 1 | 25    | 0.017   | 1    | U   | K.LDKDIVALMTR.R<br>+ Oxidation (M) |
| <a href="#">3931</a>  | 252 - 262   | 430.9075  | 1289.7007 | 1289.7013 | -0.49  | 1 | 23    | 0.029   | 1    | U   | K.LDKDIVALMTR.R<br>+ Oxidation (M) |
| <a href="#">3932</a>  | 252 - 262   | 430.9076  | 1289.7009 | 1289.7013 | -0.35  | 1 | 26    | 0.032   | 1    | U   | K.LDKDIVALMTR.R<br>+ Oxidation (M) |
| <a href="#">3933</a>  | 252 - 262   | 645.8579  | 1289.7012 | 1289.7013 | -0.094 | 1 | 41    | 0.0009  | 1    | U   | K.LDKDIVALMTR.R<br>+ Oxidation (M) |
| <a href="#">3934</a>  | 252 - 262   | 430.9077  | 1289.7012 | 1289.7013 | -0.052 | 1 | 24    | 0.032   | 1    | U   | K.LDKDIVALMTR.R<br>+ Oxidation (M) |
| <a href="#">3935</a>  | 252 - 262   | 645.8579  | 1289.7013 | 1289.7013 | -0.032 | 1 | 30    | 0.0077  | 1    | U   | K.LDKDIVALMTR.R<br>+ Oxidation (M) |
| <a href="#">3936</a>  | 252 - 262   | 430.9077  | 1289.7014 | 1289.7013 | 0.064  | 1 | 37    | 0.013   | 1    | U   | K.LDKDIVALMTR.R<br>+ Oxidation (M) |
| <a href="#">3938</a>  | 252 - 262   | 645.8580  | 1289.7015 | 1289.7013 | 0.14   | 1 | 43    | 0.00018 | 1    | U   | K.LDKDIVALMTR.R<br>+ Oxidation (M) |
| <a href="#">3939</a>  | 252 - 262   | 645.8580  | 1289.7015 | 1289.7013 | 0.19   | 1 | 42    | 0.00022 | 1    | U   | K.LDKDIVALMTR.R<br>+ Oxidation (M) |
| <a href="#">3940</a>  | 252 - 262   | 645.8581  | 1289.7017 | 1289.7013 | 0.28   | 1 | 55    | 3e-05   | 1    | U   | K.LDKDIVALMTR.R<br>+ Oxidation (M) |
| <a href="#">3943</a>  | 252 - 262   | 645.8583  | 1289.7021 | 1289.7013 | 0.62   | 1 | 64    | 4.6e-06 | 1    | U   | K.LDKDIVALMTR.R<br>+ Oxidation (M) |
| <a href="#">995</a>   | 255 - 262   | 459.7579  | 917.5012  | 917.5004  | 0.89   | 0 | 49    | 0.00038 | 1    | U   | K.DIVALMTR.R                       |
| <a href="#">1093</a>  | 255 - 262   | 467.7547  | 933.4948  | 933.4953  | -0.55  | 0 | 37    | 0.011   | 1    | U   | K.DIVALMTR.R<br>+ Oxidation (M)    |
| <a href="#">2968</a>  | 263 - 272   | 584.7804  | 1167.5463 | 1167.5455 | 0.72   | 1 | 40    | 0.0011  | 1    | U   | R.RAYDLAGSCR.G                     |
| <a href="#">1601</a>  | 264 - 272   | 506.7295  | 1011.4445 | 1011.4444 | 0.14   | 0 | 42    | 0.00046 | 1    | U   | R.AYDLAGSCR.G                      |

| Query                 | Start - End | Observed | Mr (expt) | Mr (calc) | ppm    | M | Score | Expect  | Rank | U | Peptide                   |
|-----------------------|-------------|----------|-----------|-----------|--------|---|-------|---------|------|---|---------------------------|
| <a href="#">1421</a>  | 290 - 297   | 493.7638 | 985.5131  | 985.5120  | 1.04   | 0 | 43    | 0.00061 | 1    | U | R.SYVDLYVK.D              |
| <a href="#">1422</a>  | 290 - 297   | 493.7638 | 985.5131  | 985.5120  | 1.04   | 0 | 28    | 0.023   | 1    | U | R.SYVDLYVK.D              |
| <a href="#">3401</a>  | 290 - 299   | 615.3239 | 1228.6333 | 1228.6339 | -0.55  | 1 | 28    | 0.014   | 1    | U | R.SYVDLYVKK.L             |
| <a href="#">3112</a>  | 298 - 308   | 594.8266 | 1187.6386 | 1187.6398 | -0.97  | 1 | 51    | 0.00028 | 1    | U | K.DKLDLETGVALK.V          |
| <a href="#">3113</a>  | 298 - 308   | 396.8869 | 1187.6389 | 1187.6398 | -0.72  | 1 | 36    | 0.0044  | 1    | U | K.DKLDLETGVALK.V          |
| <a href="#">3115</a>  | 298 - 308   | 594.8268 | 1187.6390 | 1187.6398 | -0.61  | 1 | 28    | 0.016   | 1    | U | K.DKLDLETGVALK.V          |
| <a href="#">3118</a>  | 298 - 308   | 594.8272 | 1187.6399 | 1187.6398 | 0.15   | 1 | 33    | 0.014   | 1    | U | K.DKLDLETGVALK.V          |
| <a href="#">3119</a>  | 298 - 308   | 594.8272 | 1187.6399 | 1187.6398 | 0.15   | 1 | 37    | 0.0029  | 1    | U | K.DKLDLETGVALK.V          |
| <a href="#">1156</a>  | 300 - 308   | 473.2665 | 944.5184  | 944.5179  | 0.57   | 0 | 59    | 7.6e-05 | 1    | U | K.LDETGVALK.V             |
| <a href="#">2158</a>  | 309 - 317   | 540.7930 | 1079.5715 | 1079.5723 | -0.80  | 0 | 38    | 0.0014  | 1    | U | K.VIHELANER.W             |
| <a href="#">2162</a>  | 309 - 317   | 360.8647 | 1079.5722 | 1079.5723 | -0.11  | 0 | 24    | 0.023   | 1    | U | K.VIHELANER.W             |
| <a href="#">2163</a>  | 309 - 317   | 360.8648 | 1079.5725 | 1079.5723 | 0.12   | 0 | 39    | 0.006   | 1    | U | K.VIHELANER.W             |
| <a href="#">2164</a>  | 309 - 317   | 360.8648 | 1079.5726 | 1079.5723 | 0.23   | 0 | 26    | 0.031   | 1    | U | K.VIHELANER.W             |
| <a href="#">2167</a>  | 309 - 317   | 540.7936 | 1079.5727 | 1079.5723 | 0.39   | 0 | 23    | 0.024   | 1    | U | K.VIHELANER.W             |
| <a href="#">2168</a>  | 309 - 317   | 540.7937 | 1079.5728 | 1079.5723 | 0.45   | 0 | 58    | 7.4e-05 | 1    | U | K.VIHELANER.W             |
| <a href="#">2170</a>  | 309 - 317   | 360.8650 | 1079.5733 | 1079.5723 | 0.87   | 0 | 21    | 0.048   | 1    | U | K.VIHELANER.W             |
| <a href="#">2171</a>  | 309 - 317   | 540.7940 | 1079.5735 | 1079.5723 | 1.09   | 0 | 53    | 0.00027 | 1    | U | K.VIHELANER.W             |
| <a href="#">3582</a>  | 318 - 327   | 625.8081 | 1249.6016 | 1249.6013 | 0.30   | 0 | 57    | 1.9e-05 | 1    | U | R.WDVCITLSEK.G            |
| <a href="#">6862</a>  | 328 - 342   | 547.6250 | 1639.8533 | 1639.8570 | -2.23  | 0 | 45    | 6.5e-05 | 1    | U | K.GFQQISFVNSIATTK.G       |
| <a href="#">6863</a>  | 328 - 342   | 820.9342 | 1639.8539 | 1639.8570 | -1.87  | 0 | 53    | 2.4e-05 | 1    | U | K.GFQQISFVNSIATTK.G       |
| <a href="#">6864</a>  | 328 - 342   | 820.9343 | 1639.8541 | 1639.8570 | -1.74  | 0 | 47    | 7.4e-05 | 1    | U | K.GFQQISFVNSIATTK.G       |
| <a href="#">6865</a>  | 328 - 342   | 547.6255 | 1639.8548 | 1639.8570 | -1.35  | 0 | 21    | 0.035   | 1    | U | K.GFQQISFVNSIATTK.G       |
| <a href="#">6867</a>  | 328 - 342   | 820.9352 | 1639.8558 | 1639.8570 | -0.70  | 0 | 34    | 0.00065 | 1    | U | K.GFQQISFVNSIATTK.G       |
| <a href="#">6868</a>  | 328 - 342   | 820.9352 | 1639.8558 | 1639.8570 | -0.69  | 0 | 38    | 0.00032 | 1    | U | K.GFQQISFVNSIATTK.G       |
| <a href="#">6869</a>  | 328 - 342   | 820.9352 | 1639.8559 | 1639.8570 | -0.63  | 0 | 28    | 0.013   | 1    | U | K.GFQQISFVNSIATTK.G       |
| <a href="#">6870</a>  | 328 - 342   | 820.9353 | 1639.8560 | 1639.8570 | -0.59  | 0 | 33    | 0.0043  | 1    | U | K.GFQQISFVNSIATTK.G       |
| <a href="#">6871</a>  | 328 - 342   | 820.9354 | 1639.8563 | 1639.8570 | -0.40  | 0 | 50    | 3.7e-05 | 1    | U | K.GFQQISFVNSIATTK.G       |
| <a href="#">6872</a>  | 328 - 342   | 547.6261 | 1639.8564 | 1639.8570 | -0.36  | 0 | 44    | 0.0001  | 1    | U | K.GFQQISFVNSIATTK.G       |
| <a href="#">6873</a>  | 328 - 342   | 820.9355 | 1639.8564 | 1639.8570 | -0.36  | 0 | 42    | 0.0048  | 1    | U | K.GFQQISFVNSIATTK.G       |
| <a href="#">6874</a>  | 328 - 342   | 820.9356 | 1639.8565 | 1639.8570 | -0.26  | 0 | 43    | 0.0043  | 1    | U | K.GFQQISFVNSIATTK.G       |
| <a href="#">6876</a>  | 328 - 342   | 820.9356 | 1639.8567 | 1639.8570 | -0.17  | 0 | 35    | 0.0065  | 1    | U | K.GFQQISFVNSIATTK.G       |
| <a href="#">6877</a>  | 328 - 342   | 820.9357 | 1639.8568 | 1639.8570 | -0.13  | 0 | 20    | 0.013   | 1    | U | K.GFQQISFVNSIATTK.G       |
| <a href="#">6878</a>  | 328 - 342   | 820.9357 | 1639.8568 | 1639.8570 | -0.12  | 0 | 60    | 5.9e-05 | 1    | U | K.GFQQISFVNSIATTK.G       |
| <a href="#">6879</a>  | 328 - 342   | 820.9357 | 1639.8568 | 1639.8570 | -0.10  | 0 | 54    | 8.6e-05 | 1    | U | K.GFQQISFVNSIATTK.G       |
| <a href="#">6880</a>  | 328 - 342   | 820.9358 | 1639.8569 | 1639.8570 | -0.019 | 0 | 17    | 0.025   | 1    | U | K.GFQQISFVNSIATTK.G       |
| <a href="#">6881</a>  | 328 - 342   | 820.9358 | 1639.8569 | 1639.8570 | -0.019 | 0 | 44    | 0.00034 | 1    | U | K.GFQQISFVNSIATTK.G       |
| <a href="#">6882</a>  | 328 - 342   | 547.6263 | 1639.8570 | 1639.8570 | -0.016 | 0 | 37    | 0.00074 | 1    | U | K.GFQQISFVNSIATTK.G       |
| <a href="#">6884</a>  | 328 - 342   | 547.6264 | 1639.8573 | 1639.8570 | 0.20   | 0 | 35    | 0.00074 | 1    | U | K.GFQQISFVNSIATTK.G       |
| <a href="#">6885</a>  | 328 - 342   | 547.6264 | 1639.8573 | 1639.8570 | 0.22   | 0 | 29    | 0.0028  | 1    | U | K.GFQQISFVNSIATTK.G       |
| <a href="#">6886</a>  | 328 - 342   | 547.6264 | 1639.8574 | 1639.8570 | 0.24   | 0 | 60    | 1.8e-05 | 1    | U | K.GFQQISFVNSIATTK.G       |
| <a href="#">6888</a>  | 328 - 342   | 820.9360 | 1639.8575 | 1639.8570 | 0.30   | 0 | 49    | 0.00048 | 1    | U | K.GFQQISFVNSIATTK.G       |
| <a href="#">6890</a>  | 328 - 342   | 820.9360 | 1639.8575 | 1639.8570 | 0.35   | 0 | 71    | 5.3e-06 | 1    | U | K.GFQQISFVNSIATTK.G       |
| <a href="#">6892</a>  | 328 - 342   | 820.9361 | 1639.8576 | 1639.8570 | 0.41   | 0 | 62    | 3.2e-06 | 1    | U | K.GFQQISFVNSIATTK.G       |
| <a href="#">6893</a>  | 328 - 342   | 820.9361 | 1639.8577 | 1639.8570 | 0.43   | 0 | 51    | 0.00039 | 1    | U | K.GFQQISFVNSIATTK.G       |
| <a href="#">6895</a>  | 328 - 342   | 820.9362 | 1639.8578 | 1639.8570 | 0.49   | 0 | 35    | 0.0014  | 1    | U | K.GFQQISFVNSIATTK.G       |
| <a href="#">6896</a>  | 328 - 342   | 820.9362 | 1639.8578 | 1639.8570 | 0.53   | 0 | 33    | 0.021   | 1    | U | K.GFQQISFVNSIATTK.G       |
| <a href="#">6897</a>  | 328 - 342   | 820.9363 | 1639.8580 | 1639.8570 | 0.63   | 0 | 53    | 2.4e-05 | 1    | U | K.GFQQISFVNSIATTK.G       |
| <a href="#">6898</a>  | 328 - 342   | 820.9364 | 1639.8581 | 1639.8570 | 0.71   | 0 | 43    | 0.00098 | 1    | U | K.GFQQISFVNSIATTK.G       |
| <a href="#">6899</a>  | 328 - 342   | 547.6267 | 1639.8582 | 1639.8570 | 0.77   | 0 | 30    | 0.0056  | 1    | U | K.GFQQISFVNSIATTK.G       |
| <a href="#">6900</a>  | 328 - 342   | 820.9364 | 1639.8583 | 1639.8570 | 0.79   | 0 | 57    | 0.00011 | 1    | U | K.GFQQISFVNSIATTK.G       |
| <a href="#">6901</a>  | 328 - 342   | 820.9368 | 1639.8589 | 1639.8570 | 1.20   | 0 | 57    | 3.1e-05 | 1    | U | K.GFQQISFVNSIATTK.G       |
| <a href="#">6902</a>  | 328 - 342   | 820.9370 | 1639.8594 | 1639.8570 | 1.48   | 0 | 41    | 0.0057  | 1    | U | K.GFQQISFVNSIATTK.G       |
| <a href="#">6903</a>  | 328 - 342   | 820.9370 | 1639.8594 | 1639.8570 | 1.49   | 0 | 15    | 0.036   | 1    | U | K.GFQQISFVNSIATTK.G       |
| <a href="#">6905</a>  | 328 - 342   | 820.9376 | 1639.8607 | 1639.8570 | 2.26   | 0 | 72    | 1.3e-06 | 1    | U | K.GFQQISFVNSIATTK.G       |
| <a href="#">4396</a>  | 346 - 357   | 679.3583 | 1356.7021 | 1356.7038 | -1.27  | 0 | 70    | 3.9e-07 | 1    | U | R.HVDYVVDQVVGK.L          |
| <a href="#">4397</a>  | 346 - 357   | 679.3588 | 1356.7030 | 1356.7038 | -0.55  | 0 | 49    | 0.00012 | 1    | U | R.HVDYVVDQVVGK.L          |
| <a href="#">4398</a>  | 346 - 357   | 679.3588 | 1356.7030 | 1356.7038 | -0.55  | 0 | 39    | 0.00065 | 1    | U | R.HVDYVVDQVVGK.L          |
| <a href="#">4400</a>  | 346 - 357   | 679.3589 | 1356.7032 | 1356.7038 | -0.40  | 0 | 81    | 6e-08   | 1    | U | R.HVDYVVDQVVGK.L          |
| <a href="#">4403</a>  | 346 - 357   | 679.3590 | 1356.7034 | 1356.7038 | -0.30  | 0 | 76    | 2e-07   | 1    | U | R.HVDYVVDQVVGK.L          |
| <a href="#">4406</a>  | 346 - 357   | 679.3592 | 1356.7039 | 1356.7038 | 0.068  | 0 | 83    | 9e-08   | 1    | U | R.HVDYVVDQVVGK.L          |
| <a href="#">4407</a>  | 346 - 357   | 679.3593 | 1356.7040 | 1356.7038 | 0.14   | 0 | 56    | 2.2e-05 | 1    | U | R.HVDYVVDQVVGK.L          |
| <a href="#">4408</a>  | 346 - 357   | 679.3593 | 1356.7040 | 1356.7038 | 0.14   | 0 | 39    | 0.00076 | 1    | U | R.HVDYVVDQVVGK.L          |
| <a href="#">4409</a>  | 346 - 357   | 679.3593 | 1356.7040 | 1356.7038 | 0.16   | 0 | 66    | 1.1e-06 | 1    | U | R.HVDYVVDQVVGK.L          |
| <a href="#">4410</a>  | 346 - 357   | 679.3593 | 1356.7041 | 1356.7038 | 0.24   | 0 | 44    | 0.00019 | 1    | U | R.HVDYVVDQVVGK.L          |
| <a href="#">4411</a>  | 346 - 357   | 679.3594 | 1356.7043 | 1356.7038 | 0.35   | 0 | 56    | 8.4e-06 | 1    | U | R.HVDYVVDQVVGK.L          |
| <a href="#">4412</a>  | 346 - 357   | 679.3594 | 1356.7043 | 1356.7038 | 0.41   | 0 | 72    | 4.3e-07 | 1    | U | R.HVDYVVDQVVGK.L          |
| <a href="#">4413</a>  | 346 - 357   | 679.3594 | 1356.7043 | 1356.7038 | 0.41   | 0 | 50    | 5.4e-05 | 1    | U | R.HVDYVVDQVVGK.L          |
| <a href="#">4414</a>  | 346 - 357   | 679.3595 | 1356.7045 | 1356.7038 | 0.52   | 0 | 62    | 3.2e-06 | 1    | U | R.HVDYVVDQVVGK.L          |
| <a href="#">4415</a>  | 346 - 357   | 453.2423 | 1356.7050 | 1356.7038 | 0.87   | 0 | 34    | 0.022   | 1    | U | R.HVDYVVDQVVGK.L          |
| <a href="#">525</a>   | 358 - 364   | 414.7814 | 827.5482  | 827.5480  | 0.23   | 1 | 25    | 0.024   | 1    | U | K.LIEVVK.K                |
| <a href="#">2886</a>  | 368 - 378   | 580.3447 | 1158.6749 | 1158.6761 | -1.07  | 0 | 47    | 0.00047 | 1    | U | K.AGVSVKPFQVK.N           |
| <a href="#">2887</a>  | 368 - 378   | 580.3448 | 1158.6751 | 1158.6761 | -0.86  | 0 | 55    | 6.8e-05 | 1    | U | K.AGVSVKPFQVK.N           |
| <a href="#">2888</a>  | 368 - 378   | 387.2324 | 1158.6754 | 1158.6761 | -0.60  | 0 | 35    | 0.0078  | 1    | U | K.AGVSVKPFQVK.N           |
| <a href="#">2890</a>  | 368 - 378   | 387.2326 | 1158.6759 | 1158.6761 | -0.14  | 0 | 50    | 0.00027 | 1    | U | K.AGVSVKPFQVK.N           |
| <a href="#">2891</a>  | 368 - 378   | 580.3453 | 1158.6761 | 1158.6761 | -0.029 | 0 | 52    | 0.00018 | 1    | U | K.AGVSVKPFQVK.N           |
| <a href="#">2893</a>  | 368 - 378   | 387.2327 | 1158.6762 | 1158.6761 | 0.043  | 0 | 27    | 0.024   | 1    | U | K.AGVSVKPFQVK.N           |
| <a href="#">2895</a>  | 368 - 378   | 580.3455 | 1158.6765 | 1158.6761 | 0.33   | 0 | 31    | 0.0085  | 1    | U | K.AGVSVKPFQVK.N           |
| <a href="#">2899</a>  | 368 - 378   | 580.3460 | 1158.6774 | 1158.6761 | 1.13   | 0 | 26    | 0.019   | 1    | U | K.AGVSVKPFQVK.N           |
| <a href="#">11046</a> | 379 - 399   | 859.4235 | 2575.2488 | 2575.2529 | -1.61  | 0 | 42    | 0.01    | 1    | U | K.NHIWVFINCLIENPTFDSQTK.E |
| <a href="#">11047</a> | 379 - 399   | 859.4246 | 2575.2521 | 2575.2529 | -0.33  | 0 | 48    | 0.0013  | 1    | U | K.NHIWVFINCLIENPTFDSQTK.E |
| <a href="#">2141</a>  | 438 - 446   | 539.3062 | 1076.5979 | 1076.5978 | 0.059  | 1 | 26    | 0.008   | 1    | U | K.FKAQTQLNK.K             |
| <a href="#">411</a>   | 440 - 446   | 401.7248 | 801.4351  | 801.4344  | 0.87   | 0 | 38    | 0.0074  | 1    | U | K.AQTQLNK.K               |
| <a href="#">1063</a>  | 440 - 447   | 465.7720 | 929.5294  | 929.5294  | -0.017 | 1 | 36    | 0.012   | 1    | U | K.AQTQLNKK.C              |
| <a href="#">4507</a>  | 458 - 471   | 685.8488 | 1369.6830 | 1369.6837 | -0.54  | 1 | 53    | 5.5e-05 | 1    | U | K.GIPKLDDANDAGGK.H        |
| <a href="#">1342</a>  | 462 - 471   | 488.2225 | 974.4305  | 974.4305  | -0.029 | 0 | 58    | 8.1e-05 | 1    | U | K.LDDANDAGGK.H            |
| <a href="#">1343</a>  | 462 - 471   | 488.2226 | 974.4306  | 974.4305  | 0.14   | 0 | 53    | 0.00016 | 1    | U | K.LDDANDAGGK.H            |
| <a href="#">1344</a>  | 462 - 471   | 488.2226 | 974.4307  | 974.4305  | 0.22   | 0 | 23    | 0.013   | 1    | U | K.LDDANDAGGK.H            |
| <a href="#">1345</a>  | 462 - 471   | 488.2229 | 974.4312  | 974.4305  | 0.73   | 0 | 27    | 0.015   | 1    | U | K.LDDANDAGGK.H            |
| <a href="#">7953</a>  | 472 - 487   | 591.9612 | 1772.8618 | 1772.8614 | 0.22   | 0 | 30    | 0.015   | 1    | U | K.HSLECTLILTEGDSAK.S      |
| <a href="#">7954</a>  | 472 - 487   | 887.4382 | 1772.8619 | 1772.8614 | 0.26   | 0 | 100   | 6.8e-10 | 1    | U | K.HSLECTLILTEGDSAK.S      |
| <a href="#">2583</a>  | 488 - 499   | 564.8401 | 1127.6657 | 1127.6663 | -0.52  | 0 | 49    | 9.7e-05 | 1    | U | K.SLAVSGLGVIGR.D          |
| <a href="#">2584</a>  | 488 - 499   | 564.8402 | 1127.6659 | 1127.6663 | -0.33  | 0 | 43    | 0.00071 | 1    | U | K.SLAVSGLGVIGR.D          |
| <a href="#">2585</a>  | 488 - 499   | 564.8402 | 1127.6659 | 1127.666  |        |   |       |         |      |   |                           |

| Query                | Start - End | Observed | Mr (expt) | Mr (calc) | ppm    | M | Score | Expect  | Rank | U | Peptide                               |
|----------------------|-------------|----------|-----------|-----------|--------|---|-------|---------|------|---|---------------------------------------|
| <a href="#">2586</a> | 488 - 499   | 564.8402 | 1127.6659 | 1127.6663 | -0.31  | 0 | 67    | 4.4e-06 | 1    | U | K.SLAVSGLGVIGR.D                      |
| <a href="#">2587</a> | 488 - 499   | 564.8403 | 1127.6660 | 1127.6663 | -0.21  | 0 | 58    | 7.7e-06 | 1    | U | K.SLAVSGLGVIGR.D                      |
| <a href="#">2588</a> | 488 - 499   | 564.8403 | 1127.6660 | 1127.6663 | -0.19  | 0 | 53    | 0.00011 | 1    | U | K.SLAVSGLGVIGR.D                      |
| <a href="#">2589</a> | 488 - 499   | 564.8403 | 1127.6661 | 1127.6663 | -0.17  | 0 | 31    | 0.0041  | 1    | U | K.SLAVSGLGVIGR.D                      |
| <a href="#">2590</a> | 488 - 499   | 564.8403 | 1127.6661 | 1127.6663 | -0.17  | 0 | 38    | 0.00027 | 1    | U | K.SLAVSGLGVIGR.D                      |
| <a href="#">2592</a> | 488 - 499   | 564.8404 | 1127.6662 | 1127.6663 | -0.064 | 0 | 61    | 2.2e-05 | 1    | U | K.SLAVSGLGVIGR.D                      |
| <a href="#">2593</a> | 488 - 499   | 564.8405 | 1127.6665 | 1127.6663 | 0.18   | 0 | 47    | 0.00021 | 1    | U | K.SLAVSGLGVIGR.D                      |
| <a href="#">2594</a> | 488 - 499   | 564.8405 | 1127.6665 | 1127.6663 | 0.22   | 0 | 65    | 7.8e-06 | 1    | U | K.SLAVSGLGVIGR.D                      |
| <a href="#">2595</a> | 488 - 499   | 564.8405 | 1127.6665 | 1127.6663 | 0.24   | 0 | 57    | 3.4e-05 | 1    | U | K.SLAVSGLGVIGR.D                      |
| <a href="#">2596</a> | 488 - 499   | 564.8405 | 1127.6665 | 1127.6663 | 0.24   | 0 | 41    | 0.00058 | 1    | U | K.SLAVSGLGVIGR.D                      |
| <a href="#">2597</a> | 488 - 499   | 564.8406 | 1127.6667 | 1127.6663 | 0.42   | 0 | 53    | 7.5e-05 | 1    | U | K.SLAVSGLGVIGR.D                      |
| <a href="#">2598</a> | 488 - 499   | 564.8406 | 1127.6667 | 1127.6663 | 0.42   | 0 | 50    | 6.3e-05 | 1    | U | K.SLAVSGLGVIGR.D                      |
| <a href="#">2599</a> | 488 - 499   | 564.8406 | 1127.6667 | 1127.6663 | 0.43   | 0 | 41    | 0.0017  | 1    | U | K.SLAVSGLGVIGR.D                      |
| <a href="#">2600</a> | 488 - 499   | 564.8407 | 1127.6669 | 1127.6663 | 0.54   | 0 | 69    | 2.4e-06 | 1    | U | K.SLAVSGLGVIGR.D                      |
| <a href="#">2601</a> | 488 - 499   | 376.8963 | 1127.6671 | 1127.6663 | 0.72   | 0 | 37    | 0.0034  | 1    | U | K.SLAVSGLGVIGR.D                      |
| <a href="#">2602</a> | 488 - 499   | 564.8410 | 1127.6675 | 1127.6663 | 1.11   | 0 | 64    | 8.2e-06 | 1    | U | K.SLAVSGLGVIGR.D                      |
| <a href="#">2603</a> | 488 - 499   | 564.8411 | 1127.6677 | 1127.6663 | 1.30   | 0 | 43    | 0.00021 | 1    | U | K.SLAVSGLGVIGR.D                      |
| <a href="#">2604</a> | 488 - 499   | 564.8412 | 1127.6678 | 1127.6663 | 1.41   | 0 | 69    | 4e-06   | 1    | U | K.SLAVSGLGVIGR.D                      |
| <a href="#">2531</a> | 500 - 508   | 561.8063 | 1121.5981 | 1121.5982 | -0.095 | 1 | 33    | 0.013   | 1    | U | R.DRYGVFPLR.G                         |
| <a href="#">638</a>  | 502 - 508   | 426.2421 | 850.4696  | 850.4701  | -0.61  | 0 | 30    | 0.0072  | 1    |   | R.YGVFPLR.G                           |
| <a href="#">642</a>  | 502 - 508   | 426.2425 | 850.4705  | 850.4701  | 0.48   | 0 | 17    | 0.038   | 1    |   | R.YGVFPLR.G                           |
| <a href="#">643</a>  | 502 - 508   | 426.2426 | 850.4707  | 850.4701  | 0.66   | 0 | 30    | 0.013   | 1    |   | R.YGVFPLR.G                           |
| <a href="#">5938</a> | 521 - 533   | 765.4045 | 1528.7945 | 1528.7919 | 1.74   | 0 | 96    | 1.7e-08 | 1    |   | K.QIMENAEINNIK.I                      |
| <a href="#">5939</a> | 521 - 533   | 510.6058 | 1528.7955 | 1528.7919 | 2.36   | 0 | 49    | 0.0011  | 1    |   | K.QIMENAEINNIK.I                      |
| <a href="#">6130</a> | 521 - 533   | 773.4007 | 1544.7869 | 1544.7868 | 0.090  | 0 | 58    | 2.3e-05 | 1    |   | K.QIMENAEINNIK.I + Oxidation (M)      |
| <a href="#">6131</a> | 521 - 533   | 773.4008 | 1544.7871 | 1544.7868 | 0.19   | 0 | 50    | 0.00039 | 1    |   | K.QIMENAEINNIK.I + Oxidation (M)      |
| <a href="#">6132</a> | 521 - 533   | 773.4012 | 1544.7879 | 1544.7868 | 0.70   | 0 | 62    | 1.5e-05 | 1    |   | K.QIMENAEINNIK.I + Oxidation (M)      |
| <a href="#">6133</a> | 521 - 533   | 773.4012 | 1544.7879 | 1544.7868 | 0.72   | 0 | 71    | 3.5e-06 | 1    |   | K.QIMENAEINNIK.I + Oxidation (M)      |
| <a href="#">483</a>  | 534 - 540   | 410.7503 | 819.4860  | 819.4854  | 0.71   | 0 | 21    | 0.043   | 1    |   | K.IVGLQYK.K                           |
| <a href="#">484</a>  | 534 - 540   | 410.7504 | 819.4862  | 819.4854  | 0.95   | 0 | 45    | 0.00038 | 1    |   | K.IVGLQYK.K                           |
| <a href="#">2850</a> | 541 - 550   | 385.8556 | 1154.5449 | 1154.5455 | -0.56  | 1 | 24    | 0.02    | 1    | U | K.KSYDDAESLK.T                        |
| <a href="#">2851</a> | 541 - 550   | 578.2799 | 1154.5453 | 1154.5455 | -0.20  | 1 | 36    | 0.0012  | 1    | U | K.KSYDDAESLK.T                        |
| <a href="#">2853</a> | 541 - 550   | 578.2802 | 1154.5458 | 1154.5455 | 0.28   | 1 | 21    | 0.039   | 1    | U | K.KSYDDAESLK.T                        |
| <a href="#">2854</a> | 541 - 550   | 578.2808 | 1154.5470 | 1154.5455 | 1.32   | 1 | 34    | 0.0018  | 1    | U | K.KSYDDAESLK.T                        |
| <a href="#">1714</a> | 542 - 550   | 514.2325 | 1026.4504 | 1026.4505 | -0.17  | 0 | 25    | 0.0081  | 1    | U | K.SYDDAESLK.T                         |
| <a href="#">1715</a> | 542 - 550   | 514.2326 | 1026.4506 | 1026.4505 | 0.060  | 0 | 39    | 0.00075 | 1    | U | K.SYDDAESLK.T                         |
| <a href="#">1716</a> | 542 - 550   | 514.2326 | 1026.4507 | 1026.4505 | 0.20   | 0 | 45    | 0.00017 | 1    | U | K.SYDDAESLK.T                         |
| <a href="#">1717</a> | 542 - 550   | 514.2328 | 1026.4511 | 1026.4505 | 0.57   | 0 | 27    | 0.012   | 1    | U | K.SYDDAESLK.T                         |
| <a href="#">4691</a> | 542 - 553   | 699.3495 | 1396.6844 | 1396.6834 | 0.70   | 1 | 60    | 1.4e-05 | 1    | U | K.SYDDAESLKLTLR.Y                     |
| <a href="#">7623</a> | 557 - 571   | 866.4054 | 1730.7963 | 1730.7968 | -0.28  | 0 | 87    | 7.3e-08 | 1    |   | K.IMIMTDQDQDGSNIK.G                   |
| <a href="#">7629</a> | 557 - 571   | 866.4058 | 1730.7971 | 1730.7968 | 0.18   | 0 | 70    | 2.2e-06 | 1    |   | K.IMIMTDQDQDGSNIK.G                   |
| <a href="#">7630</a> | 557 - 571   | 577.9397 | 1730.7974 | 1730.7968 | 0.37   | 0 | 35    | 0.0059  | 1    |   | K.IMIMTDQDQDGSNIK.G                   |
| <a href="#">7631</a> | 557 - 571   | 866.4061 | 1730.7976 | 1730.7968 | 0.52   | 0 | 75    | 2.1e-06 | 1    |   | K.IMIMTDQDQDGSNIK.G                   |
| <a href="#">7633</a> | 557 - 571   | 866.4067 | 1730.7989 | 1730.7968 | 1.22   | 0 | 59    | 0.00012 | 1    |   | K.IMIMTDQDQDGSNIK.G                   |
| <a href="#">7751</a> | 557 - 571   | 583.2706 | 1746.7900 | 1746.7917 | -0.96  | 0 | 48    | 0.0017  | 1    |   | K.IMIMTDQDQDGSNIK.G + Oxidation (M)   |
| <a href="#">7752</a> | 557 - 571   | 583.2707 | 1746.7903 | 1746.7917 | -0.80  | 0 | 28    | 0.02    | 1    |   | K.IMIMTDQDQDGSNIK.G + Oxidation (M)   |
| <a href="#">7754</a> | 557 - 571   | 874.4026 | 1746.7906 | 1746.7917 | -0.62  | 0 | 64    | 4e-05   | 1    |   | K.IMIMTDQDQDGSNIK.G + Oxidation (M)   |
| <a href="#">7755</a> | 557 - 571   | 874.4027 | 1746.7908 | 1746.7917 | -0.49  | 0 | 68    | 2.2e-06 | 1    |   | K.IMIMTDQDQDGSNIK.G + Oxidation (M)   |
| <a href="#">7756</a> | 557 - 571   | 874.4027 | 1746.7909 | 1746.7917 | -0.45  | 0 | 91    | 1.4e-08 | 1    |   | K.IMIMTDQDQDGSNIK.G + Oxidation (M)   |
| <a href="#">7757</a> | 557 - 571   | 583.2710 | 1746.7912 | 1746.7917 | -0.29  | 0 | 28    | 0.01    | 1    |   | K.IMIMTDQDQDGSNIK.G + Oxidation (M)   |
| <a href="#">7760</a> | 557 - 571   | 583.2711 | 1746.7915 | 1746.7917 | -0.097 | 0 | 43    | 0.0016  | 1    |   | K.IMIMTDQDQDGSNIK.G + Oxidation (M)   |
| <a href="#">7761</a> | 557 - 571   | 874.4033 | 1746.7920 | 1746.7917 | 0.19   | 0 | 71    | 9.3e-06 | 1    |   | K.IMIMTDQDQDGSNIK.G + Oxidation (M)   |
| <a href="#">7762</a> | 557 - 571   | 583.2713 | 1746.7920 | 1746.7917 | 0.19   | 0 | 23    | 0.023   | 1    |   | K.IMIMTDQDQDGSNIK.G + Oxidation (M)   |
| <a href="#">7763</a> | 557 - 571   | 583.2713 | 1746.7921 | 1746.7917 | 0.26   | 0 | 34    | 0.045   | 1    |   | K.IMIMTDQDQDGSNIK.G + Oxidation (M)   |
| <a href="#">7764</a> | 557 - 571   | 874.4034 | 1746.7922 | 1746.7917 | 0.28   | 0 | 72    | 7.4e-06 | 1    |   | K.IMIMTDQDQDGSNIK.G + Oxidation (M)   |
| <a href="#">7765</a> | 557 - 571   | 583.2714 | 1746.7924 | 1746.7917 | 0.42   | 0 | 49    | 0.0013  | 1    |   | K.IMIMTDQDQDGSNIK.G + Oxidation (M)   |
| <a href="#">7766</a> | 557 - 571   | 583.2715 | 1746.7926 | 1746.7917 | 0.50   | 0 | 51    | 0.00052 | 1    |   | K.IMIMTDQDQDGSNIK.G + Oxidation (M)   |
| <a href="#">7767</a> | 557 - 571   | 583.2719 | 1746.7939 | 1746.7917 | 1.29   | 0 | 26    | 0.0099  | 1    |   | K.IMIMTDQDQDGSNIK.G + Oxidation (M)   |
| <a href="#">7870</a> | 557 - 571   | 588.6019 | 1762.7840 | 1762.7866 | -1.47  | 0 | 29    | 0.011   | 1    |   | K.IMIMTDQDQDGSNIK.G + 2 Oxidation (M) |
| <a href="#">7871</a> | 557 - 571   | 588.6021 | 1762.7845 | 1762.7866 | -1.19  | 0 | 50    | 0.00052 | 1    |   | K.IMIMTDQDQDGSNIK.G + 2 Oxidation (M) |
| <a href="#">7873</a> | 557 - 571   | 588.6023 | 1762.7852 | 1762.7866 | -0.81  | 0 | 51    | 0.00012 | 1    |   | K.IMIMTDQDQDGSNIK.G + 2 Oxidation (M) |
| <a href="#">7874</a> | 557 - 571   | 588.6024 | 1762.7853 | 1762.7866 | -0.76  | 0 | 38    | 0.0046  | 1    |   | K.IMIMTDQDQDGSNIK.G + 2 Oxidation (M) |
| <a href="#">7877</a> | 557 - 571   | 882.4004 | 1762.7862 | 1762.7866 | -0.23  | 0 | 73    | 5.7e-06 | 1    |   | K.IMIMTDQDQDGSNIK.G + 2 Oxidation (M) |
| <a href="#">7878</a> | 557 - 571   | 882.4004 | 1762.7863 | 1762.7866 | -0.17  | 0 | 41    | 0.0012  | 1    |   | K.IMIMTDQDQDGSNIK.G + 2 Oxidation (M) |
| <a href="#">7879</a> | 557 - 571   | 882.4004 | 1762.7863 | 1762.7866 | -0.15  | 0 | 71    | 9.5e-06 | 1    |   | K.IMIMTDQDQDGSNIK.G + 2 Oxidation (M) |
| <a href="#">7880</a> | 557 - 571   | 588.6027 | 1762.7864 | 1762.7866 | -0.13  | 0 | 24    | 0.0096  | 1    |   | K.IMIMTDQDQDGSNIK.G + 2 Oxidation (M) |
| <a href="#">7881</a> | 557 - 571   | 882.4005 | 1762.7864 | 1762.7866 | -0.12  | 0 | 62    | 5e-05   | 1    |   | K.IMIMTDQDQDGSNIK.G + 2 Oxidation (M) |
| <a href="#">7882</a> | 557 - 571   | 588.6028 | 1762.7864 | 1762.7866 | -0.096 | 0 | 58    | 0.00021 | 1    |   | K.IMIMTDQDQDGSNIK.G                   |

| Query                 | Start - End | Observed  | Mr (expt) | Mr (calc) | ppm     | M | Score | Expect  | Rank | U | Peptide                                   |
|-----------------------|-------------|-----------|-----------|-----------|---------|---|-------|---------|------|---|-------------------------------------------|
| <a href="#">7883</a>  | 557 - 571   | 882.4006  | 1762.7866 | 1762.7866 | -0.0017 | 0 | 70    | 1.2e-05 | 1    | 1 | + 2 Oxidation (M)<br>K.IMIMTDQDQDGGSHIK.G |
| <a href="#">7884</a>  | 557 - 571   | 588.6028  | 1762.7866 | 1762.7866 | 0.023   | 0 | 44    | 0.0016  | 1    | 1 | + 2 Oxidation (M)<br>K.IMIMTDQDQDGGSHIK.G |
| <a href="#">7886</a>  | 557 - 571   | 882.4007  | 1762.7869 | 1762.7866 | 0.16    | 0 | 62    | 7.3e-05 | 1    | 1 | + 2 Oxidation (M)<br>K.IMIMTDQDQDGGSHIK.G |
| <a href="#">7887</a>  | 557 - 571   | 588.6030  | 1762.7870 | 1762.7866 | 0.24    | 0 | 21    | 0.031   | 1    | 1 | + 2 Oxidation (M)<br>K.IMIMTDQDQDGGSHIK.G |
| <a href="#">7888</a>  | 557 - 571   | 588.6031  | 1762.7876 | 1762.7866 | 0.55    | 0 | 28    | 0.013   | 1    | 1 | + 2 Oxidation (M)<br>K.IMIMTDQDQDGGSHIK.G |
| <a href="#">7890</a>  | 557 - 571   | 882.4025  | 1762.7904 | 1762.7866 | 2.18    | 0 | 62    | 4.1e-05 | 1    | 1 | + 2 Oxidation (M)<br>K.IMIMTDQDQDGGSHIK.G |
| <a href="#">8870</a>  | 572 - 587   | 634.6956  | 1901.0649 | 1901.0676 | -1.37   | 0 | 20    | 0.015   | 1    | U | K.GLLINFIHNNWPSLLK.H                      |
| <a href="#">8874</a>  | 572 - 587   | 951.5410  | 1901.0674 | 1901.0676 | -0.054  | 0 | 41    | 0.00013 | 1    | U | K.GLLINFIHNNWPSLLK.H                      |
| <a href="#">8875</a>  | 572 - 587   | 951.5411  | 1901.0676 | 1901.0676 | 0.030   | 0 | 52    | 1.4e-05 | 1    | U | K.GLLINFIHNNWPSLLK.H                      |
| <a href="#">8878</a>  | 572 - 587   | 634.6966  | 1901.0681 | 1901.0676 | 0.28    | 0 | 27    | 0.018   | 1    | U | K.GLLINFIHNNWPSLLK.H                      |
| <a href="#">8879</a>  | 572 - 587   | 634.6967  | 1901.0682 | 1901.0676 | 0.32    | 0 | 18    | 0.028   | 1    | U | K.GLLINFIHNNWPSLLK.H                      |
| <a href="#">5940</a>  | 588 - 600   | 765.4198  | 1528.8251 | 1528.8290 | -2.51   | 0 | 71    | 1.9e-06 | 1    | U | K.HGFLEEFITPIVK.A                         |
| <a href="#">5941</a>  | 588 - 600   | 510.6158  | 1528.8254 | 1528.8290 | -2.32   | 0 | 38    | 0.0095  | 1    | U | K.HGFLEEFITPIVK.A                         |
| <a href="#">5942</a>  | 588 - 600   | 765.4210  | 1528.8274 | 1528.8290 | -0.99   | 0 | 58    | 3.5e-06 | 1    | U | K.HGFLEEFITPIVK.A                         |
| <a href="#">5944</a>  | 588 - 600   | 765.4211  | 1528.8276 | 1528.8290 | -0.90   | 0 | 70    | 1e-06   | 1    | U | K.HGFLEEFITPIVK.A                         |
| <a href="#">5945</a>  | 588 - 600   | 765.4212  | 1528.8279 | 1528.8290 | -0.70   | 0 | 71    | 2.3e-07 | 1    | U | K.HGFLEEFITPIVK.A                         |
| <a href="#">5947</a>  | 588 - 600   | 510.6167  | 1528.8282 | 1528.8290 | -0.47   | 0 | 28    | 0.026   | 1    | U | K.HGFLEEFITPIVK.A                         |
| <a href="#">5948</a>  | 588 - 600   | 510.6168  | 1528.8286 | 1528.8290 | -0.26   | 0 | 46    | 0.0017  | 1    | U | K.HGFLEEFITPIVK.A                         |
| <a href="#">5949</a>  | 588 - 600   | 765.4216  | 1528.8286 | 1528.8290 | -0.22   | 0 | 66    | 6.7e-07 | 1    | U | K.HGFLEEFITPIVK.A                         |
| <a href="#">5950</a>  | 588 - 600   | 510.6168  | 1528.8286 | 1528.8290 | -0.22   | 0 | 44    | 0.0026  | 1    | U | K.HGFLEEFITPIVK.A                         |
| <a href="#">5952</a>  | 588 - 600   | 510.6168  | 1528.8287 | 1528.8290 | -0.20   | 0 | 43    | 0.0032  | 1    | U | K.HGFLEEFITPIVK.A                         |
| <a href="#">5953</a>  | 588 - 600   | 765.4217  | 1528.8288 | 1528.8290 | -0.12   | 0 | 64    | 9.1e-07 | 1    | U | K.HGFLEEFITPIVK.A                         |
| <a href="#">5954</a>  | 588 - 600   | 510.6169  | 1528.8288 | 1528.8290 | -0.099  | 0 | 34    | 0.0019  | 1    | U | K.HGFLEEFITPIVK.A                         |
| <a href="#">5955</a>  | 588 - 600   | 510.6169  | 1528.8288 | 1528.8290 | -0.080  | 0 | 30    | 0.0096  | 1    | U | K.HGFLEEFITPIVK.A                         |
| <a href="#">5956</a>  | 588 - 600   | 765.4217  | 1528.8289 | 1528.8290 | -0.063  | 0 | 90    | 5.9e-09 | 1    | U | K.HGFLEEFITPIVK.A                         |
| <a href="#">5957</a>  | 588 - 600   | 510.6169  | 1528.8290 | 1528.8290 | -0.0013 | 0 | 38    | 0.003   | 1    | U | K.HGFLEEFITPIVK.A                         |
| <a href="#">5958</a>  | 588 - 600   | 765.4218  | 1528.8290 | 1528.8290 | 0.016   | 0 | 76    | 8.2e-08 | 1    | U | K.HGFLEEFITPIVK.A                         |
| <a href="#">5959</a>  | 588 - 600   | 765.4218  | 1528.8291 | 1528.8290 | 0.081   | 0 | 38    | 0.0013  | 1    | U | K.HGFLEEFITPIVK.A                         |
| <a href="#">5960</a>  | 588 - 600   | 765.4218  | 1528.8291 | 1528.8290 | 0.081   | 0 | 58    | 1.3e-05 | 1    | U | K.HGFLEEFITPIVK.A                         |
| <a href="#">5961</a>  | 588 - 600   | 765.4218  | 1528.8291 | 1528.8290 | 0.094   | 0 | 56    | 1.5e-05 | 1    | U | K.HGFLEEFITPIVK.A                         |
| <a href="#">5962</a>  | 588 - 600   | 765.4218  | 1528.8291 | 1528.8290 | 0.094   | 0 | 84    | 4.3e-08 | 1    | U | K.HGFLEEFITPIVK.A                         |
| <a href="#">5963</a>  | 588 - 600   | 765.4218  | 1528.8291 | 1528.8290 | 0.11    | 0 | 24    | 0.02    | 1    | U | K.HGFLEEFITPIVK.A                         |
| <a href="#">5964</a>  | 588 - 600   | 510.6170  | 1528.8292 | 1528.8290 | 0.16    | 0 | 44    | 0.0023  | 1    | U | K.HGFLEEFITPIVK.A                         |
| <a href="#">5965</a>  | 588 - 600   | 765.4219  | 1528.8292 | 1528.8290 | 0.16    | 0 | 87    | 1.3e-08 | 1    | U | K.HGFLEEFITPIVK.A                         |
| <a href="#">5967</a>  | 588 - 600   | 765.4219  | 1528.8293 | 1528.8290 | 0.23    | 0 | 20    | 0.012   | 1    | U | K.HGFLEEFITPIVK.A                         |
| <a href="#">5968</a>  | 588 - 600   | 510.6171  | 1528.8295 | 1528.8290 | 0.33    | 0 | 22    | 0.025   | 1    | U | K.HGFLEEFITPIVK.A                         |
| <a href="#">5969</a>  | 588 - 600   | 765.4220  | 1528.8295 | 1528.8290 | 0.34    | 0 | 65    | 8.4e-07 | 1    | U | K.HGFLEEFITPIVK.A                         |
| <a href="#">5970</a>  | 588 - 600   | 510.6171  | 1528.8295 | 1528.8290 | 0.35    | 0 | 26    | 0.039   | 1    | U | K.HGFLEEFITPIVK.A                         |
| <a href="#">5971</a>  | 588 - 600   | 765.4221  | 1528.8296 | 1528.8290 | 0.41    | 0 | 46    | 0.00022 | 1    | U | K.HGFLEEFITPIVK.A                         |
| <a href="#">5972</a>  | 588 - 600   | 765.4221  | 1528.8296 | 1528.8290 | 0.45    | 0 | 68    | 6.9e-07 | 1    | U | K.HGFLEEFITPIVK.A                         |
| <a href="#">5973</a>  | 588 - 600   | 765.4221  | 1528.8297 | 1528.8290 | 0.49    | 0 | 40    | 0.00035 | 1    | U | K.HGFLEEFITPIVK.A                         |
| <a href="#">5975</a>  | 588 - 600   | 765.4222  | 1528.8299 | 1528.8290 | 0.64    | 0 | 56    | 6e-06   | 1    | U | K.HGFLEEFITPIVK.A                         |
| <a href="#">5976</a>  | 588 - 600   | 765.4225  | 1528.8305 | 1528.8290 | 1.00    | 0 | 22    | 0.025   | 1    | U | K.HGFLEEFITPIVK.A                         |
| <a href="#">9880</a>  | 604 - 620   | 1080.5171 | 2159.0196 | 2159.0211 | -0.69   | 1 | 102   | 7.1e-09 | 1    | U | K.NKQELSFYSIPEFDEWK.K                     |
| <a href="#">9881</a>  | 604 - 620   | 1080.5172 | 2159.0199 | 2159.0211 | -0.57   | 1 | 87    | 1.2e-07 | 1    | U | K.NKQELSFYSIPEFDEWK.K                     |
| <a href="#">9882</a>  | 604 - 620   | 720.6813  | 2159.0220 | 2159.0211 | 0.41    | 1 | 26    | 0.039   | 1    | U | K.NKQELSFYSIPEFDEWK.K                     |
| <a href="#">10288</a> | 604 - 621   | 572.7859  | 2287.1146 | 2287.1161 | -0.65   | 2 | 25    | 0.045   | 1    | U | K.NKQELSFYSIPEFDEWKK.H                    |
| <a href="#">10289</a> | 604 - 621   | 1144.5649 | 2287.1152 | 2287.1161 | -0.36   | 2 | 67    | 6.3e-07 | 1    | U | K.NKQELSFYSIPEFDEWKK.H                    |
| <a href="#">10290</a> | 604 - 621   | 763.3794  | 2287.1163 | 2287.1161 | 0.085   | 2 | 44    | 0.00074 | 1    | U | K.NKQELSFYSIPEFDEWKK.H                    |
| <a href="#">8985</a>  | 606 - 620   | 959.4480  | 1916.8814 | 1916.8832 | -0.97   | 0 | 58    | 1.6e-05 | 1    | U | K.QELSFYSIPEFDEWK.K                       |
| <a href="#">8987</a>  | 606 - 620   | 959.4498  | 1916.8850 | 1916.8832 | 0.92    | 0 | 38    | 0.0019  | 1    | U | K.QELSFYSIPEFDEWK.K                       |
| <a href="#">9496</a>  | 606 - 621   | 1023.4963 | 2044.9781 | 2044.9782 | -0.045  | 1 | 38    | 0.0008  | 1    | U | K.QELSFYSIPEFDEWKK.H                      |
| <a href="#">9497</a>  | 606 - 621   | 682.6668  | 2044.9786 | 2044.9782 | 0.19    | 1 | 39    | 0.0026  | 1    | U | K.QELSFYSIPEFDEWKK.H                      |
| <a href="#">1986</a>  | 647 - 654   | 530.7240  | 1059.4334 | 1059.4331 | 0.25    | 0 | 18    | 0.027   | 1    | U | K.EYFADMER.H                              |
| <a href="#">1988</a>  | 647 - 654   | 530.7240  | 1059.4335 | 1059.4331 | 0.40    | 0 | 33    | 0.0053  | 1    | U | K.EYFADMER.H                              |
| <a href="#">2127</a>  | 647 - 654   | 538.7210  | 1075.4273 | 1075.4280 | -0.64   | 0 | 17    | 0.034   | 1    | U | K.EYFADMER.H<br>+ Oxidation (M)           |
| <a href="#">2128</a>  | 647 - 654   | 538.7211  | 1075.4277 | 1075.4280 | -0.35   | 0 | 26    | 0.015   | 1    | U | K.EYFADMER.H<br>+ Oxidation (M)           |
| <a href="#">2130</a>  | 647 - 654   | 538.7213  | 1075.4280 | 1075.4280 | -0.048  | 0 | 33    | 0.0075  | 1    | U | K.EYFADMER.H<br>+ Oxidation (M)           |
| <a href="#">7075</a>  | 661 - 676   | 834.9068  | 1667.7989 | 1667.8042 | -3.18   | 0 | 77    | 1.9e-07 | 1    | U | R.YAGPEDDAAITLAFSK.K                      |
| <a href="#">7076</a>  | 661 - 676   | 834.9089  | 1667.8032 | 1667.8042 | -0.60   | 0 | 68    | 1.1e-06 | 1    | U | R.YAGPEDDAAITLAFSK.K                      |
| <a href="#">7077</a>  | 661 - 676   | 834.9089  | 1667.8032 | 1667.8042 | -0.60   | 0 | 59    | 1.5e-05 | 1    | U | R.YAGPEDDAAITLAFSK.K                      |
| <a href="#">7078</a>  | 661 - 676   | 834.9089  | 1667.8033 | 1667.8042 | -0.59   | 0 | 79    | 7.3e-08 | 1    | U | R.YAGPEDDAAITLAFSK.K                      |
| <a href="#">7079</a>  | 661 - 676   | 834.9090  | 1667.8034 | 1667.8042 | -0.49   | 0 | 80    | 3e-08   | 1    | U | R.YAGPEDDAAITLAFSK.K                      |
| <a href="#">7080</a>  | 661 - 676   | 834.9091  | 1667.8037 | 1667.8042 | -0.33   | 0 | 57    | 9.3e-06 | 1    | U | R.YAGPEDDAAITLAFSK.K                      |
| <a href="#">7081</a>  | 661 - 676   | 834.9092  | 1667.8039 | 1667.8042 | -0.18   | 0 | 74    | 2.3e-07 | 1    | U | R.YAGPEDDAAITLAFSK.K                      |
| <a href="#">7082</a>  | 661 - 676   | 834.9094  | 1667.8042 | 1667.8042 | -0.046  | 0 | 71    | 2.2e-07 | 1    | U | R.YAGPEDDAAITLAFSK.K                      |
| <a href="#">7083</a>  | 661 - 676   | 834.9094  | 1667.8042 | 1667.8042 | -0.022  | 0 | 91    | 5.6e-09 | 1    | U | R.YAGPEDDAAITLAFSK.K                      |
| <a href="#">7084</a>  | 661 - 676   | 834.9094  | 1667.8043 | 1667.8042 | 0.050   | 0 | 52    | 1.7e-05 | 1    | U | R.YAGPEDDAAITLAFSK.K                      |
| <a href="#">7085</a>  | 661 - 676   | 834.9095  | 1667.8044 | 1667.8042 | 0.098   | 0 | 71    | 2.1e-07 | 1    | U | R.YAGPEDDAAITLAFSK.K                      |
| <a href="#">7086</a>  | 661 - 676   | 834.9096  | 1667.8046 | 1667.8042 | 0.21    | 0 | 64    | 4.4e-06 | 1    | U | R.YAGPEDDAAITLAFSK.K                      |
| <a href="#">7087</a>  | 661 - 676   | 834.9096  | 1667.8047 | 1667.8042 | 0.25    | 0 | 74    | 1.2e-07 | 1    | U | R.YAGPEDDAAITLAFSK.K                      |
| <a href="#">7088</a>  | 661 - 676   | 834.9096  | 1667.8047 | 1667.8042 | 0.28    | 0 | 86    | 3.3e-08 | 1    | U | R.YAGPEDDAAITLAFSK.K                      |
| <a href="#">7089</a>  | 661 - 676   | 834.9097  | 1667.8048 | 1667.8042 | 0.33    | 0 | 90    | 1.9e-08 | 1    | U | R.YAGPEDDAAITLAFSK.K                      |
| <a href="#">7090</a>  | 661 - 676   | 834.9097  | 1667.8048 | 1667.8042 | 0.35    | 0 | 74    | 1.2e-07 | 1    | U | R.YAGPEDDAAITLAFSK.K                      |
| <a href="#">7091</a>  | 661 - 676   | 834.9097  | 1667.8049 | 1667.8042 | 0.40    | 0 | 73    | 1.5e-07 | 1    | U | R.YAGPEDDAAITLAFSK.K                      |
| <a href="#">7092</a>  | 661 - 676   | 556.9423  | 1667.8052 | 1667.8042 | 0.57    | 0 | 45    | 0.00045 | 1    | U | R.YAGPEDDAAITLAFSK.K                      |
| <a href="#">7093</a>  | 661 - 676   | 834.9099  | 1667.8052 | 1667.8042 | 0.58    | 0 | 80    | 1.4e-07 | 1    | U | R.YAGPEDDAAITLAFSK.K                      |
| <a href="#">7094</a>  | 661 - 676   | 834.9100  | 1667.8055 | 1667.8042 | 0.76    | 0 | 83    | 5.7e-08 | 1    | U | R.YAGPEDDAAITLAFSK.K                      |
| <a href="#">7095</a>  | 661 - 676   | 834.9101  | 1667.8056 | 1667.8042 | 0.81    | 0 | 74    | 5.7e-07 | 1    | U | R.YAGPEDDAAITLAFSK.K                      |
| <a href="#">7096</a>  | 661 - 676   | 834.9101  | 1667.8057 | 1667.8042 | 0.85    | 0 | 88    | 6.1e-09 | 1    | U | R.YAGPEDDAAITLAFSK.K                      |
| <a href="#">7097</a>  | 661 - 676   | 834.9104  | 1667.8062 | 1667.8042 | 1.20    | 0 | 62    | 1.7e-06 | 1    | U | R.YAGPEDDAAITLAFSK.K                      |
| <a href="#">7098</a>  | 661 - 676   | 834.9107  | 1667.8068 | 1667.8042 | 1.51    | 0 | 70    | 5.7e-07 | 1    | U | R.YAGPEDDAAITLAFSK.K                      |
| <a href="#">7099</a>  | 661 - 676   | 834.9113  | 1667.8080 | 1667.8042 | 2.24    | 0 | 63    | 1.3e-06 | 1</  |   |                                           |



| Query                | Start - End | Observed | Mr (expt) | Mr (calc) | ppm    | M | Score | Expect  | Rank | U | Peptide                            |
|----------------------|-------------|----------|-----------|-----------|--------|---|-------|---------|------|---|------------------------------------|
| <a href="#">7101</a> | 661 - 676   | 834.9115 | 1667.8084 | 1667.8042 | 2.52   | 0 | 58    | 3.7e-06 | 1    | U | R.YAGPEDDAAITLAFSK.K               |
| <a href="#">5267</a> | 683 - 693   | 734.8454 | 1467.6773 | 1467.6816 | -2.97  | 1 | 23    | 0.012   | 1    | U | R.KEWLTNFMEDR.R                    |
| <a href="#">5270</a> | 683 - 693   | 490.2346 | 1467.6819 | 1467.6816 | 0.22   | 1 | 18    | 0.049   | 1    | U | R.KEWLTNFMEDR.R                    |
| <a href="#">5396</a> | 683 - 693   | 495.5660 | 1483.6761 | 1483.6765 | -0.31  | 1 | 28    | 0.011   | 1    | U | R.KEWLTNFMEDR.R<br>+ Oxidation (M) |
| <a href="#">5397</a> | 683 - 693   | 742.8453 | 1483.6761 | 1483.6765 | -0.29  | 1 | 27    | 0.0048  | 1    | U | R.KEWLTNFMEDR.R<br>+ Oxidation (M) |
| <a href="#">5398</a> | 683 - 693   | 742.8456 | 1483.6766 | 1483.6765 | 0.016  | 1 | 27    | 0.0083  | 1    | U | R.KEWLTNFMEDR.R<br>+ Oxidation (M) |
| <a href="#">5399</a> | 683 - 693   | 742.8458 | 1483.6770 | 1483.6765 | 0.33   | 1 | 49    | 0.00018 | 1    | U | R.KEWLTNFMEDR.R<br>+ Oxidation (M) |
| <a href="#">5400</a> | 683 - 693   | 495.5663 | 1483.6771 | 1483.6765 | 0.38   | 1 | 26    | 0.009   | 1    | U | R.KEWLTNFMEDR.R<br>+ Oxidation (M) |
| <a href="#">5401</a> | 683 - 693   | 495.5664 | 1483.6772 | 1483.6765 | 0.46   | 1 | 28    | 0.0059  | 1    | U | R.KEWLTNFMEDR.R<br>+ Oxidation (M) |
| <a href="#">5402</a> | 683 - 693   | 742.8463 | 1483.6780 | 1483.6765 | 1.01   | 1 | 28    | 0.015   | 1    | U | R.KEWLTNFMEDR.R<br>+ Oxidation (M) |
| <a href="#">5403</a> | 683 - 693   | 495.5667 | 1483.6782 | 1483.6765 | 1.14   | 1 | 30    | 0.009   | 1    | U | R.KEWLTNFMEDR.R<br>+ Oxidation (M) |
| <a href="#">5404</a> | 683 - 693   | 742.8466 | 1483.6785 | 1483.6765 | 1.35   | 1 | 32    | 0.0014  | 1    | U | R.KEWLTNFMEDR.R<br>+ Oxidation (M) |
| <a href="#">5405</a> | 683 - 693   | 495.5673 | 1483.6800 | 1483.6765 | 2.30   | 1 | 31    | 0.022   | 1    | U | R.KEWLTNFMEDR.R<br>+ Oxidation (M) |
| <a href="#">6784</a> | 683 - 694   | 542.2680 | 1623.7821 | 1623.7827 | -0.36  | 2 | 40    | 0.0026  | 1    | U | R.KEWLTNFMEDRR.Q                   |
| <a href="#">4305</a> | 684 - 693   | 670.8006 | 1339.5867 | 1339.5867 | 0.043  | 0 | 61    | 2.3e-06 | 1    | U | K.EWLTNFMEDR.R                     |
| <a href="#">4306</a> | 684 - 693   | 670.8009 | 1339.5872 | 1339.5867 | 0.39   | 0 | 49    | 0.0002  | 1    | U | K.EWLTNFMEDR.R                     |
| <a href="#">4388</a> | 684 - 693   | 678.7975 | 1355.5804 | 1355.5816 | -0.86  | 0 | 28    | 0.011   | 1    | U | K.EWLTNFMEDR.R<br>+ Oxidation (M)  |
| <a href="#">4389</a> | 684 - 693   | 678.7980 | 1355.5814 | 1355.5816 | -0.10  | 0 | 38    | 0.0053  | 1    | U | K.EWLTNFMEDR.R<br>+ Oxidation (M)  |
| <a href="#">4390</a> | 684 - 693   | 678.7982 | 1355.5818 | 1355.5816 | 0.13   | 0 | 38    | 0.0017  | 1    | U | K.EWLTNFMEDR.R<br>+ Oxidation (M)  |
| <a href="#">4391</a> | 684 - 693   | 678.7982 | 1355.5818 | 1355.5816 | 0.18   | 0 | 25    | 0.026   | 1    | U | K.EWLTNFMEDR.R<br>+ Oxidation (M)  |
| <a href="#">8424</a> | 697 - 712   | 610.9995 | 1829.9768 | 1829.9788 | -1.12  | 1 | 48    | 0.00049 | 1    | U | R.RLHGLPEQFLYGTATK.H               |
| <a href="#">8425</a> | 697 - 712   | 610.9997 | 1829.9772 | 1829.9788 | -0.85  | 1 | 43    | 0.00043 | 1    | U | R.RLHGLPEQFLYGTATK.H               |
| <a href="#">8426</a> | 697 - 712   | 610.9998 | 1829.9777 | 1829.9788 | -0.63  | 1 | 58    | 1.3e-05 | 1    | U | R.RLHGLPEQFLYGTATK.H               |
| <a href="#">8428</a> | 697 - 712   | 915.9963 | 1829.9780 | 1829.9788 | -0.46  | 1 | 83    | 5.9e-08 | 1    | U | R.RLHGLPEQFLYGTATK.H               |
| <a href="#">8429</a> | 697 - 712   | 611.0000 | 1829.9780 | 1829.9788 | -0.43  | 1 | 57    | 5.3e-05 | 1    | U | R.RLHGLPEQFLYGTATK.H               |
| <a href="#">8430</a> | 697 - 712   | 915.9964 | 1829.9782 | 1829.9788 | -0.33  | 1 | 78    | 9.2e-08 | 1    | U | R.RLHGLPEQFLYGTATK.H               |
| <a href="#">8432</a> | 697 - 712   | 611.0003 | 1829.9792 | 1829.9788 | 0.19   | 1 | 27    | 0.0085  | 1    | U | R.RLHGLPEQFLYGTATK.H               |
| <a href="#">8433</a> | 697 - 712   | 611.0004 | 1829.9793 | 1829.9788 | 0.29   | 1 | 40    | 0.001   | 1    | U | R.RLHGLPEQFLYGTATK.H               |
| <a href="#">8435</a> | 697 - 712   | 611.0005 | 1829.9796 | 1829.9788 | 0.42   | 1 | 40    | 0.00046 | 1    | U | R.RLHGLPEQFLYGTATK.H               |
| <a href="#">8436</a> | 697 - 712   | 611.0006 | 1829.9798 | 1829.9788 | 0.56   | 1 | 46    | 0.0004  | 1    | U | R.RLHGLPEQFLYGTATK.H               |
| <a href="#">8437</a> | 697 - 712   | 611.0010 | 1829.9811 | 1829.9788 | 1.24   | 1 | 31    | 0.0049  | 1    | U | R.RLHGLPEQFLYGTATK.H               |
| <a href="#">8438</a> | 697 - 712   | 611.0010 | 1829.9811 | 1829.9788 | 1.24   | 1 | 24    | 0.017   | 1    | U | R.RLHGLPEQFLYGTATK.H               |
| <a href="#">7139</a> | 698 - 712   | 837.9447 | 1673.8748 | 1673.8777 | -1.74  | 0 | 37    | 0.00031 | 1    | U | R.LHGLPEQFLYGTATK.H                |
| <a href="#">7140</a> | 698 - 712   | 837.9447 | 1673.8748 | 1673.8777 | -1.73  | 0 | 28    | 0.019   | 1    | U | R.LHGLPEQFLYGTATK.H                |
| <a href="#">7141</a> | 698 - 712   | 837.9447 | 1673.8749 | 1673.8777 | -1.67  | 0 | 22    | 0.018   | 1    | U | R.LHGLPEQFLYGTATK.H                |
| <a href="#">7142</a> | 698 - 712   | 558.9658 | 1673.8755 | 1673.8777 | -1.34  | 0 | 28    | 0.015   | 1    | U | R.LHGLPEQFLYGTATK.H                |
| <a href="#">7143</a> | 698 - 712   | 837.9456 | 1673.8767 | 1673.8777 | -0.61  | 0 | 26    | 0.0048  | 1    | U | R.LHGLPEQFLYGTATK.H                |
| <a href="#">7144</a> | 698 - 712   | 837.9456 | 1673.8767 | 1673.8777 | -0.59  | 0 | 40    | 0.0002  | 1    | U | R.LHGLPEQFLYGTATK.H                |
| <a href="#">7146</a> | 698 - 712   | 837.9457 | 1673.8768 | 1673.8777 | -0.55  | 0 | 28    | 0.0024  | 1    | U | R.LHGLPEQFLYGTATK.H                |
| <a href="#">7147</a> | 698 - 712   | 837.9457 | 1673.8769 | 1673.8777 | -0.47  | 0 | 25    | 0.0042  | 1    | U | R.LHGLPEQFLYGTATK.H                |
| <a href="#">7149</a> | 698 - 712   | 837.9458 | 1673.8770 | 1673.8777 | -0.41  | 0 | 33    | 0.0015  | 1    | U | R.LHGLPEQFLYGTATK.H                |
| <a href="#">7151</a> | 698 - 712   | 558.9663 | 1673.8770 | 1673.8777 | -0.41  | 0 | 19    | 0.038   | 1    | U | R.LHGLPEQFLYGTATK.H                |
| <a href="#">7154</a> | 698 - 712   | 837.9459 | 1673.8772 | 1673.8777 | -0.29  | 0 | 25    | 0.0048  | 1    | U | R.LHGLPEQFLYGTATK.H                |
| <a href="#">7155</a> | 698 - 712   | 837.9460 | 1673.8773 | 1673.8777 | -0.21  | 0 | 54    | 9.4e-06 | 1    | U | R.LHGLPEQFLYGTATK.H                |
| <a href="#">7156</a> | 698 - 712   | 558.9665 | 1673.8776 | 1673.8777 | -0.089 | 0 | 34    | 0.0016  | 1    | U | R.LHGLPEQFLYGTATK.H                |
| <a href="#">7158</a> | 698 - 712   | 558.9665 | 1673.8776 | 1673.8777 | -0.053 | 0 | 29    | 0.0037  | 1    | U | R.LHGLPEQFLYGTATK.H                |
| <a href="#">7160</a> | 698 - 712   | 558.9665 | 1673.8778 | 1673.8777 | 0.036  | 0 | 50    | 6.8e-05 | 1    | U | R.LHGLPEQFLYGTATK.H                |
| <a href="#">7161</a> | 698 - 712   | 837.9462 | 1673.8778 | 1673.8777 | 0.040  | 0 | 41    | 0.00021 | 1    | U | R.LHGLPEQFLYGTATK.H                |
| <a href="#">7162</a> | 698 - 712   | 419.4767 | 1673.8778 | 1673.8777 | 0.045  | 0 | 25    | 0.019   | 1    | U | R.LHGLPEQFLYGTATK.H                |
| <a href="#">7163</a> | 698 - 712   | 558.9666 | 1673.8779 | 1673.8777 | 0.14   | 0 | 52    | 0.00013 | 1    | U | R.LHGLPEQFLYGTATK.H                |
| <a href="#">7164</a> | 698 - 712   | 558.9666 | 1673.8780 | 1673.8777 | 0.18   | 0 | 34    | 0.0038  | 1    | U | R.LHGLPEQFLYGTATK.H                |
| <a href="#">7165</a> | 698 - 712   | 558.9666 | 1673.8780 | 1673.8777 | 0.20   | 0 | 20    | 0.047   | 1    | U | R.LHGLPEQFLYGTATK.H                |
| <a href="#">7166</a> | 698 - 712   | 837.9464 | 1673.8781 | 1673.8777 | 0.27   | 0 | 56    | 6.7e-06 | 1    | U | R.LHGLPEQFLYGTATK.H                |
| <a href="#">7167</a> | 698 - 712   | 558.9667 | 1673.8782 | 1673.8777 | 0.27   | 0 | 21    | 0.046   | 1    | U | R.LHGLPEQFLYGTATK.H                |
| <a href="#">7168</a> | 698 - 712   | 837.9464 | 1673.8782 | 1673.8777 | 0.33   | 0 | 41    | 0.00013 | 1    | U | R.LHGLPEQFLYGTATK.H                |
| <a href="#">7169</a> | 698 - 712   | 837.9464 | 1673.8783 | 1673.8777 | 0.34   | 0 | 34    | 0.00063 | 1    | U | R.LHGLPEQFLYGTATK.H                |
| <a href="#">7170</a> | 698 - 712   | 558.9667 | 1673.8783 | 1673.8777 | 0.34   | 0 | 29    | 0.011   | 1    | U | R.LHGLPEQFLYGTATK.H                |
| <a href="#">7171</a> | 698 - 712   | 837.9464 | 1673.8783 | 1673.8777 | 0.37   | 0 | 39    | 0.00021 | 1    | U | R.LHGLPEQFLYGTATK.H                |
| <a href="#">7172</a> | 698 - 712   | 558.9667 | 1673.8784 | 1673.8777 | 0.39   | 0 | 39    | 0.0048  | 1    | U | R.LHGLPEQFLYGTATK.H                |
| <a href="#">7173</a> | 698 - 712   | 558.9668 | 1673.8785 | 1673.8777 | 0.45   | 0 | 44    | 0.0028  | 1    | U | R.LHGLPEQFLYGTATK.H                |
| <a href="#">7174</a> | 698 - 712   | 558.9668 | 1673.8785 | 1673.8777 | 0.47   | 0 | 42    | 0.00081 | 1    | U | R.LHGLPEQFLYGTATK.H                |
| <a href="#">7176</a> | 698 - 712   | 837.9469 | 1673.8793 | 1673.8777 | 0.96   | 0 | 55    | 7.3e-06 | 1    | U | R.LHGLPEQFLYGTATK.H                |
| <a href="#">7177</a> | 698 - 712   | 558.9671 | 1673.8794 | 1673.8777 | 0.99   | 0 | 28    | 0.027   | 1    | U | R.LHGLPEQFLYGTATK.H                |
| <a href="#">7178</a> | 698 - 712   | 558.9671 | 1673.8796 | 1673.8777 | 1.11   | 0 | 33    | 0.0047  | 1    | U | R.LHGLPEQFLYGTATK.H                |
| <a href="#">3685</a> | 713 - 722   | 632.8183 | 1263.6220 | 1263.6248 | -2.20  | 0 | 15    | 0.039   | 1    | U | K.HLTYNDFINK.E                     |
| <a href="#">3686</a> | 713 - 722   | 632.8190 | 1263.6235 | 1263.6248 | -1.00  | 0 | 28    | 0.0076  | 1    | U | K.HLTYNDFINK.E                     |
| <a href="#">3687</a> | 713 - 722   | 632.8191 | 1263.6236 | 1263.6248 | -0.95  | 0 | 25    | 0.013   | 1    | U | K.HLTYNDFINK.E                     |
| <a href="#">3688</a> | 713 - 722   | 632.8192 | 1263.6238 | 1263.6248 | -0.76  | 0 | 16    | 0.033   | 1    | U | K.HLTYNDFINK.E                     |
| <a href="#">3689</a> | 713 - 722   | 632.8192 | 1263.6238 | 1263.6248 | -0.75  | 0 | 37    | 0.0096  | 1    | U | K.HLTYNDFINK.E                     |
| <a href="#">3690</a> | 713 - 722   | 632.8192 | 1263.6239 | 1263.6248 | -0.68  | 0 | 24    | 0.011   | 1    | U | K.HLTYNDFINK.E                     |
| <a href="#">3691</a> | 713 - 722   | 632.8193 | 1263.6240 | 1263.6248 | -0.59  | 0 | 26    | 0.018   | 1    | U | K.HLTYNDFINK.E                     |
| <a href="#">3692</a> | 713 - 722   | 632.8194 | 1263.6241 | 1263.6248 | -0.49  | 0 | 31    | 0.0049  | 1    | U | K.HLTYNDFINK.E                     |
| <a href="#">3693</a> | 713 - 722   | 632.8195 | 1263.6244 | 1263.6248 | -0.30  | 0 | 31    | 0.0038  | 1    | U | K.HLTYNDFINK.E                     |
| <a href="#">3694</a> | 713 - 722   | 422.2154 | 1263.6245 | 1263.6248 | -0.20  | 0 | 35    | 0.0052  | 1    | U | K.HLTYNDFINK.E                     |
| <a href="#">3695</a> | 713 - 722   | 632.8196 | 1263.6246 | 1263.6248 | -0.13  | 0 | 44    | 0.003   | 1    | U | K.HLTYNDFINK.E                     |
| <a href="#">3696</a> | 713 - 722   | 632.8196 | 1263.6246 | 1263.6248 | -0.11  | 0 | 29    | 0.026   | 1    | U | K.HLTYNDFINK.E                     |
| <a href="#">3697</a> | 713 - 722   | 632.8196 | 1263.6247 | 1263.6248 | -0.082 | 0 | 18    | 0.036   | 1    | U | K.HLTYNDFINK.E                     |
| <a href="#">3699</a> | 713 - 722   | 632.8196 | 1263.6247 | 1263.6248 | -0.050 | 0 | 36    | 0.0012  | 1    | U | K.HLTYNDFINK.E                     |
| <a href="#">3700</a> | 713 - 722   | 632.8196 | 1263.6247 | 1263.6248 | -0.018 | 0 | 32    | 0.0022  | 1    | U | K.HLTYNDFINK.E                     |
| <a href="#">3701</a> | 713 - 722   | 632.8197 | 1263.6249 | 1263.6248 | 0.077  | 0 | 37    | 0.001   | 1    | U | K.HLTYNDFINK.E                     |

| Query                 | Start - End | Observed | Mr (expt) | Mr (calc) | ppm    | M | Score | Expect  | Rank | U | Peptide                         |
|-----------------------|-------------|----------|-----------|-----------|--------|---|-------|---------|------|---|---------------------------------|
| <a href="#">3702</a>  | 713 - 722   | 632.8197 | 1263.6249 | 1263.6248 | 0.093  | 0 | 32    | 0.0013  | 1    | U | K.HLTYNDFINK.E                  |
| <a href="#">3703</a>  | 713 - 722   | 632.8197 | 1263.6249 | 1263.6248 | 0.093  | 0 | 25    | 0.023   | 1    | U | K.HLTYNDFINK.E                  |
| <a href="#">3705</a>  | 713 - 722   | 632.8198 | 1263.6249 | 1263.6248 | 0.14   | 0 | 28    | 0.0066  | 1    | U | K.HLTYNDFINK.E                  |
| <a href="#">3707</a>  | 713 - 722   | 632.8198 | 1263.6250 | 1263.6248 | 0.20   | 0 | 23    | 0.0093  | 1    | U | K.HLTYNDFINK.E                  |
| <a href="#">3708</a>  | 713 - 722   | 632.8198 | 1263.6251 | 1263.6248 | 0.27   | 0 | 25    | 0.02    | 1    | U | K.HLTYNDFINK.E                  |
| <a href="#">3709</a>  | 713 - 722   | 632.8198 | 1263.6251 | 1263.6248 | 0.28   | 0 | 34    | 0.00072 | 1    | U | K.HLTYNDFINK.E                  |
| <a href="#">3710</a>  | 713 - 722   | 632.8200 | 1263.6254 | 1263.6248 | 0.52   | 0 | 28    | 0.0098  | 1    | U | K.HLTYNDFINK.E                  |
| <a href="#">3711</a>  | 713 - 722   | 632.8200 | 1263.6255 | 1263.6248 | 0.55   | 0 | 44    | 0.00022 | 1    | U | K.HLTYNDFINK.E                  |
| <a href="#">3712</a>  | 713 - 722   | 632.8201 | 1263.6257 | 1263.6248 | 0.74   | 0 | 34    | 0.00086 | 1    | U | K.HLTYNDFINK.E                  |
| <a href="#">3713</a>  | 713 - 722   | 632.8202 | 1263.6257 | 1263.6248 | 0.77   | 0 | 22    | 0.034   | 1    | U | K.HLTYNDFINK.E                  |
| <a href="#">3715</a>  | 713 - 722   | 632.8202 | 1263.6259 | 1263.6248 | 0.92   | 0 | 22    | 0.028   | 1    | U | K.HLTYNDFINK.E                  |
| <a href="#">3717</a>  | 713 - 722   | 632.8205 | 1263.6265 | 1263.6248 | 1.37   | 0 | 36    | 0.0012  | 1    | U | K.HLTYNDFINK.E                  |
| <a href="#">11319</a> | 713 - 734   | 894.7795 | 2681.3166 | 2681.3085 | 3.04   | 1 | 48    | 0.00017 | 1    | U | K.HLTYNDFINKELILFNSDNER.S       |
| <a href="#">4959</a>  | 723 - 734   | 718.8534 | 1435.6921 | 1435.6943 | -1.49  | 0 | 25    | 0.016   | 1    |   | K.ELILFNSDNER.S                 |
| <a href="#">4960</a>  | 723 - 734   | 718.8536 | 1435.6926 | 1435.6943 | -1.14  | 0 | 28    | 0.048   | 1    |   | K.ELILFNSDNER.S                 |
| <a href="#">4962</a>  | 723 - 734   | 718.8540 | 1435.6934 | 1435.6943 | -0.63  | 0 | 33    | 0.0084  | 1    |   | K.ELILFNSDNER.S                 |
| <a href="#">4963</a>  | 723 - 734   | 718.8541 | 1435.6936 | 1435.6943 | -0.45  | 0 | 33    | 0.0093  | 1    |   | K.ELILFNSDNER.S                 |
| <a href="#">4964</a>  | 723 - 734   | 718.8542 | 1435.6938 | 1435.6943 | -0.31  | 0 | 41    | 0.00047 | 1    |   | K.ELILFNSDNER.S                 |
| <a href="#">4965</a>  | 723 - 734   | 718.8542 | 1435.6939 | 1435.6943 | -0.24  | 0 | 33    | 0.005   | 1    |   | K.ELILFNSDNER.S                 |
| <a href="#">4967</a>  | 723 - 734   | 718.8544 | 1435.6942 | 1435.6943 | -0.029 | 0 | 45    | 0.00038 | 1    |   | K.ELILFNSDNER.S                 |
| <a href="#">4969</a>  | 723 - 734   | 718.8545 | 1435.6945 | 1435.6943 | 0.12   | 0 | 38    | 0.0039  | 1    |   | K.ELILFNSDNER.S                 |
| <a href="#">4970</a>  | 723 - 734   | 718.8545 | 1435.6945 | 1435.6943 | 0.15   | 0 | 43    | 0.0031  | 1    |   | K.ELILFNSDNER.S                 |
| <a href="#">4973</a>  | 723 - 734   | 718.8548 | 1435.6950 | 1435.6943 | 0.51   | 0 | 26    | 0.027   | 1    |   | K.ELILFNSDNER.S                 |
| <a href="#">4974</a>  | 723 - 734   | 718.8548 | 1435.6951 | 1435.6943 | 0.57   | 0 | 32    | 0.01    | 1    |   | K.ELILFNSDNER.S                 |
| <a href="#">4975</a>  | 723 - 734   | 718.8551 | 1435.6956 | 1435.6943 | 0.92   | 0 | 40    | 0.0024  | 1    |   | K.ELILFNSDNER.S                 |
| <a href="#">4976</a>  | 723 - 734   | 718.8552 | 1435.6958 | 1435.6943 | 1.07   | 0 | 45    | 0.00058 | 1    |   | K.ELILFNSDNER.S                 |
| <a href="#">4977</a>  | 723 - 734   | 718.8557 | 1435.6969 | 1435.6943 | 1.82   | 0 | 32    | 0.0044  | 1    |   | K.ELILFNSDNER.S                 |
| <a href="#">5565</a>  | 735 - 748   | 750.9114 | 1499.8082 | 1499.8096 | -0.92  | 0 | 53    | 7.9e-05 | 1    | U | R.SIPSLVDGFKPGQR.K              |
| <a href="#">5572</a>  | 735 - 748   | 750.9119 | 1499.8092 | 1499.8096 | -0.26  | 0 | 34    | 0.0052  | 1    | U | R.SIPSLVDGFKPGQR.K              |
| <a href="#">5582</a>  | 735 - 748   | 750.9123 | 1499.8101 | 1499.8096 | 0.30   | 0 | 57    | 3.8e-05 | 1    | U | R.SIPSLVDGFKPGQR.K              |
| <a href="#">5586</a>  | 735 - 748   | 750.9128 | 1499.8110 | 1499.8096 | 0.89   | 0 | 35    | 0.00099 | 1    | U | R.SIPSLVDGFKPGQR.K              |
| <a href="#">5587</a>  | 735 - 748   | 750.9129 | 1499.8112 | 1499.8096 | 1.06   | 0 | 42    | 0.00029 | 1    | U | R.SIPSLVDGFKPGQR.K              |
| <a href="#">2391</a>  | 815 - 825   | 554.7966 | 1107.5785 | 1107.5785 | 0.051  | 1 | 36    | 0.0011  | 1    | U | R.LHGGKDAASPR.Y                 |
| <a href="#">2392</a>  | 815 - 825   | 554.7966 | 1107.5785 | 1107.5785 | 0.051  | 1 | 54    | 3.1e-05 | 1    | U | R.LHGGKDAASPR.Y                 |
| <a href="#">2393</a>  | 815 - 825   | 370.2001 | 1107.5786 | 1107.5785 | 0.064  | 1 | 33    | 0.0048  | 1    | U | R.LHGGKDAASPR.Y                 |
| <a href="#">4128</a>  | 826 - 836   | 658.3570 | 1314.6994 | 1314.7006 | -0.89  | 0 | 46    | 0.00011 | 1    | U | R.YIFTMLSTLAR.L                 |
| <a href="#">4129</a>  | 826 - 836   | 658.3576 | 1314.7007 | 1314.7006 | 0.084  | 0 | 33    | 0.0013  | 1    | U | R.YIFTMLSTLAR.L                 |
| <a href="#">4130</a>  | 826 - 836   | 658.3577 | 1314.7008 | 1314.7006 | 0.15   | 0 | 46    | 0.00012 | 1    | U | R.YIFTMLSTLAR.L                 |
| <a href="#">4131</a>  | 826 - 836   | 658.3577 | 1314.7008 | 1314.7006 | 0.19   | 0 | 32    | 0.005   | 1    | U | R.YIFTMLSTLAR.L                 |
| <a href="#">4132</a>  | 826 - 836   | 658.3577 | 1314.7008 | 1314.7006 | 0.21   | 0 | 37    | 0.002   | 1    | U | R.YIFTMLSTLAR.L                 |
| <a href="#">4133</a>  | 826 - 836   | 658.3577 | 1314.7009 | 1314.7006 | 0.27   | 0 | 50    | 6.7e-05 | 1    | U | R.YIFTMLSTLAR.L                 |
| <a href="#">4134</a>  | 826 - 836   | 658.3578 | 1314.7011 | 1314.7006 | 0.39   | 0 | 37    | 0.0044  | 1    | U | R.YIFTMLSTLAR.L                 |
| <a href="#">4135</a>  | 826 - 836   | 658.3579 | 1314.7012 | 1314.7006 | 0.45   | 0 | 39    | 0.00022 | 1    | U | R.YIFTMLSTLAR.L                 |
| <a href="#">4136</a>  | 826 - 836   | 658.3579 | 1314.7013 | 1314.7006 | 0.54   | 0 | 47    | 0.00014 | 1    | U | R.YIFTMLSTLAR.L                 |
| <a href="#">4138</a>  | 826 - 836   | 658.3587 | 1314.7028 | 1314.7006 | 1.67   | 0 | 33    | 0.0011  | 1    | U | R.YIFTMLSTLAR.L                 |
| <a href="#">4254</a>  | 826 - 836   | 666.3544 | 1330.6943 | 1330.6955 | -0.91  | 0 | 46    | 0.00013 | 1    | U | R.YIFTMLSTLAR.L + Oxidation (M) |
| <a href="#">4255</a>  | 826 - 836   | 666.3550 | 1330.6954 | 1330.6955 | -0.096 | 0 | 21    | 0.0098  | 1    | U | R.YIFTMLSTLAR.L + Oxidation (M) |
| <a href="#">4256</a>  | 826 - 836   | 666.3550 | 1330.6954 | 1330.6955 | -0.096 | 0 | 24    | 0.02    | 1    | U | R.YIFTMLSTLAR.L + Oxidation (M) |
| <a href="#">4257</a>  | 826 - 836   | 666.3550 | 1330.6954 | 1330.6955 | -0.066 | 0 | 40    | 0.00037 | 1    | U | R.YIFTMLSTLAR.L + Oxidation (M) |
| <a href="#">4258</a>  | 826 - 836   | 666.3551 | 1330.6956 | 1330.6955 | 0.069  | 0 | 57    | 2.1e-05 | 1    | U | R.YIFTMLSTLAR.L + Oxidation (M) |
| <a href="#">4260</a>  | 826 - 836   | 666.3552 | 1330.6958 | 1330.6955 | 0.23   | 0 | 42    | 0.00061 | 1    | U | R.YIFTMLSTLAR.L + Oxidation (M) |
| <a href="#">4261</a>  | 826 - 836   | 666.3552 | 1330.6958 | 1330.6955 | 0.26   | 0 | 39    | 0.002   | 1    | U | R.YIFTMLSTLAR.L + Oxidation (M) |
| <a href="#">4262</a>  | 826 - 836   | 666.3552 | 1330.6959 | 1330.6955 | 0.31   | 0 | 34    | 0.00064 | 1    | U | R.YIFTMLSTLAR.L + Oxidation (M) |
| <a href="#">4263</a>  | 826 - 836   | 666.3552 | 1330.6959 | 1330.6955 | 0.31   | 0 | 46    | 0.00026 | 1    | U | R.YIFTMLSTLAR.L + Oxidation (M) |
| <a href="#">4264</a>  | 826 - 836   | 666.3552 | 1330.6959 | 1330.6955 | 0.34   | 0 | 53    | 4e-05   | 1    | U | R.YIFTMLSTLAR.L + Oxidation (M) |
| <a href="#">4265</a>  | 826 - 836   | 666.3554 | 1330.6962 | 1330.6955 | 0.50   | 0 | 49    | 9.2e-05 | 1    | U | R.YIFTMLSTLAR.L + Oxidation (M) |
| <a href="#">4269</a>  | 826 - 836   | 666.3567 | 1330.6988 | 1330.6955 | 2.52   | 0 | 50    | 0.00052 | 1    | U | R.YIFTMLSTLAR.L + Oxidation (M) |
| <a href="#">4416</a>  | 837 - 848   | 679.3894 | 1356.7642 | 1356.7653 | -0.77  | 0 | 60    | 2e-05   | 1    | U | R.LLFPVDDNLLK.F                 |
| <a href="#">4417</a>  | 837 - 848   | 679.3897 | 1356.7649 | 1356.7653 | -0.28  | 0 | 47    | 0.00029 | 1    | U | R.LLFPVDDNLLK.F                 |
| <a href="#">4418</a>  | 837 - 848   | 679.3898 | 1356.7650 | 1356.7653 | -0.21  | 0 | 25    | 0.022   | 1    | U | R.LLFPVDDNLLK.F                 |
| <a href="#">4419</a>  | 837 - 848   | 679.3898 | 1356.7650 | 1356.7653 | -0.21  | 0 | 33    | 0.0054  | 1    | U | R.LLFPVDDNLLK.F                 |
| <a href="#">4420</a>  | 837 - 848   | 679.3898 | 1356.7651 | 1356.7653 | -0.10  | 0 | 32    | 0.007   | 1    | U | R.LLFPVDDNLLK.F                 |
| <a href="#">4421</a>  | 837 - 848   | 679.3898 | 1356.7651 | 1356.7653 | -0.10  | 0 | 33    | 0.0043  | 1    | U | R.LLFPVDDNLLK.F                 |
| <a href="#">4422</a>  | 837 - 848   | 679.3899 | 1356.7652 | 1356.7653 | -0.060 | 0 | 38    | 0.0037  | 1    | U | R.LLFPVDDNLLK.F                 |
| <a href="#">4423</a>  | 837 - 848   | 679.3899 | 1356.7652 | 1356.7653 | -0.030 | 0 | 45    | 0.00023 | 1    | U | R.LLFPVDDNLLK.F                 |
| <a href="#">4424</a>  | 837 - 848   | 679.3899 | 1356.7653 | 1356.7653 | -0.015 | 0 | 42    | 0.00077 | 1    | U | R.LLFPVDDNLLK.F                 |
| <a href="#">4425</a>  | 837 - 848   | 679.3900 | 1356.7654 | 1356.7653 | 0.088  | 0 | 37    | 0.0039  | 1    | U | R.LLFPVDDNLLK.F                 |
| <a href="#">4426</a>  | 837 - 848   | 679.3900 | 1356.7655 | 1356.7653 | 0.16   | 0 | 40    | 0.00085 | 1    | U | R.LLFPVDDNLLK.F                 |
| <a href="#">4427</a>  | 837 - 848   | 679.3901 | 1356.7656 | 1356.7653 | 0.24   | 0 | 31    | 0.0024  | 1    | U | R.LLFPVDDNLLK.F                 |
| <a href="#">4428</a>  | 837 - 848   | 679.3901 | 1356.7657 | 1356.7653 | 0.28   | 0 | 42    | 0.0027  | 1    | U | R.LLFPVDDNLLK.F                 |
| <a href="#">4430</a>  | 837 - 848   | 679.3901 | 1356.7657 | 1356.7653 | 0.29   | 0 | 40    | 0.0032  | 1    | U | R.LLFPVDDNLLK.F                 |
| <a href="#">4432</a>  | 837 - 848   | 679.3902 | 1356.7658 | 1356.7653 | 0.41   | 0 | 24    | 0.037   | 1    | U | R.LLFPVDDNLLK.F                 |
| <a href="#">4433</a>  | 837 - 848   | 679.3903 | 1356.7660 | 1356.7653 | 0.53   | 0 | 37    | 0.0012  | 1    | U | R.LLFPVDDNLLK.F                 |
| <a href="#">4434</a>  | 837 - 848   | 679.3903 | 1356.7660 | 1356.7653 | 0.56   | 0 | 33    | 0.015   | 1    | U | R.LLFPVDDNLLK.F                 |
| <a href="#">4435</a>  | 837 - 848   | 679.3904 | 1356.7662 | 1356.7653 | 0.68   | 0 | 54    | 3.1e-05 | 1    | U | R.LLFPVDDNLLK.F                 |
| <a href="#">4436</a>  | 837 - 848   | 679.3904 | 1356.7663 | 1356.7653 | 0.77   | 0 | 21    | 0.011   | 1    | U | R.LLFPVDDNLLK.F                 |
| <a href="#">4437</a>  | 837 - 848   | 679.3905 | 1356.7664 | 1356.7653 | 0.82   | 0 | 33    | 0.0035  | 1    | U | R.LLFPVDDNLLK.F                 |
| <a href="#">4438</a>  | 837 - 848   | 679.3905 | 1356.7664 | 1356.7653 | 0.84   | 0 | 25    | 0.0083  | 1    | U | R.LLFPVDDNLLK.F                 |
| <a href="#">4439</a>  | 837 - 848   | 679.3905 | 1356.7665 | 1356.7653 | 0.90   | 0 | 18    | 0.031   | 1    | U | R.LLFPVDDNLLK.F                 |
| <a href="#">4440</a>  | 837 - 848   | 679.3907 | 1356.7668 | 1356.7653 | 1.09   | 0 | 29    | 0.0065  | 1    | U | R.LLFPVDDNLLK.F                 |
| <a href="#">4441</a>  | 837 - 848   | 679.3910 | 1356.7673 | 1356.7653 | 1.52   | 0 | 25    | 0.0044  | 1    | U | R.LLFPVDDNLLK.F                 |
| <a href="#">2074</a>  | 849 - 856   | 535.7488 | 1069.4830 | 1069.4829 | 0.13   | 0 | 33    | 0.032   | 1    |   | K.FLYDDNQR.V                    |

| Query                 | Start - End | Observed  | Mr (expt) | Mr (calc) | ppm    | M | Score | Expect  | Rank | U | Peptide                                       |
|-----------------------|-------------|-----------|-----------|-----------|--------|---|-------|---------|------|---|-----------------------------------------------|
| <a href="#">630</a>   | 885 - 891   | 424.7169  | 847.4192  | 847.4188  | 0.51   | 0 | 37    | 0.007   | 1    | U | K.LPNYDAR.E                                   |
| <a href="#">7713</a>  | 900 - 914   | 870.9256  | 1739.8365 | 1739.8375 | -0.54  | 0 | 66    | 7.4e-06 | 1    | U | R.MLDGLDPPHMLPNYK.N                           |
| <a href="#">7715</a>  | 900 - 914   | 580.9530  | 1739.8373 | 1739.8375 | -0.11  | 0 | 35    | 0.013   | 1    | U | R.MLDGLDPPHMLPNYK.N                           |
| <a href="#">7720</a>  | 900 - 914   | 870.9270  | 1739.8395 | 1739.8375 | 1.17   | 0 | 46    | 0.00037 | 1    | U | R.MLDGLDPPHMLPNYK.N                           |
| <a href="#">7832</a>  | 900 - 914   | 878.9226  | 1755.8307 | 1755.8324 | -0.96  | 0 | 31    | 0.003   | 1    | U | R.MLDGLDPPHMLPNYK.N<br>+ Oxidation (M)        |
| <a href="#">7834</a>  | 900 - 914   | 878.9232  | 1755.8319 | 1755.8324 | -0.27  | 0 | 53    | 7.3e-05 | 1    | U | R.MLDGLDPPHMLPNYK.N<br>+ Oxidation (M)        |
| <a href="#">7838</a>  | 900 - 914   | 878.9241  | 1755.8337 | 1755.8324 | 0.72   | 0 | 34    | 0.0013  | 1    | U | R.MLDGLDPPHMLPNYK.N<br>+ Oxidation (M)        |
| <a href="#">7944</a>  | 900 - 914   | 886.9206  | 1771.8267 | 1771.8273 | -0.34  | 0 | 41    | 0.00024 | 1    | U | R.MLDGLDPPHMLPNYK.N<br>+ 2 Oxidation (M)      |
| <a href="#">7946</a>  | 900 - 914   | 886.9209  | 1771.8272 | 1771.8273 | -0.072 | 0 | 17    | 0.041   | 1    | U | R.MLDGLDPPHMLPNYK.N<br>+ 2 Oxidation (M)      |
| <a href="#">7948</a>  | 900 - 914   | 886.9214  | 1771.8282 | 1771.8273 | 0.53   | 0 | 36    | 0.00089 | 1    | U | R.MLDGLDPPHMLPNYK.N<br>+ 2 Oxidation (M)      |
| <a href="#">7949</a>  | 900 - 914   | 886.9215  | 1771.8284 | 1771.8273 | 0.59   | 0 | 36    | 0.0013  | 1    | U | R.MLDGLDPPHMLPNYK.N<br>+ 2 Oxidation (M)      |
| <a href="#">10582</a> | 918 - 939   | 1212.1115 | 2422.2084 | 2422.2129 | -1.85  | 0 | 49    | 0.00027 | 1    | U | K.GTIQELGQNYAVSGEIFVVDN.N                     |
| <a href="#">10583</a> | 918 - 939   | 808.4103  | 2422.2091 | 2422.2129 | -1.54  | 0 | 48    | 9.2e-05 | 1    | U | K.GTIQELGQNYAVSGEIFVVDN.N                     |
| <a href="#">10584</a> | 918 - 939   | 1212.1120 | 2422.2094 | 2422.2129 | -1.44  | 0 | 34    | 0.00078 | 1    | U | K.GTIQELGQNYAVSGEIFVVDN.N                     |
| <a href="#">10586</a> | 918 - 939   | 1212.1121 | 2422.2097 | 2422.2129 | -1.30  | 0 | 79    | 2.7e-07 | 1    | U | K.GTIQELGQNYAVSGEIFVVDN.N                     |
| <a href="#">10587</a> | 918 - 939   | 1212.1126 | 2422.2107 | 2422.2129 | -0.90  | 0 | 38    | 0.00028 | 1    | U | K.GTIQELGQNYAVSGEIFVVDN.N                     |
| <a href="#">10588</a> | 918 - 939   | 1212.1127 | 2422.2108 | 2422.2129 | -0.86  | 0 | 82    | 4.6e-08 | 1    | U | K.GTIQELGQNYAVSGEIFVVDN.N                     |
| <a href="#">10589</a> | 918 - 939   | 1212.1129 | 2422.2112 | 2422.2129 | -0.67  | 0 | 26    | 0.0076  | 1    | U | K.GTIQELGQNYAVSGEIFVVDN.N                     |
| <a href="#">10591</a> | 918 - 939   | 1212.1130 | 2422.2114 | 2422.2129 | -0.60  | 0 | 130   | 4e-12   | 1    | U | K.GTIQELGQNYAVSGEIFVVDN.N                     |
| <a href="#">10592</a> | 918 - 939   | 1212.1132 | 2422.2118 | 2422.2129 | -0.43  | 0 | 61    | 1.3e-05 | 1    | U | K.GTIQELGQNYAVSGEIFVVDN.N                     |
| <a href="#">10593</a> | 918 - 939   | 1212.1132 | 2422.2118 | 2422.2129 | -0.42  | 0 | 66    | 2.6e-06 | 1    | U | K.GTIQELGQNYAVSGEIFVVDN.N                     |
| <a href="#">10594</a> | 918 - 939   | 1212.1132 | 2422.2119 | 2422.2129 | -0.38  | 0 | 83    | 1.1e-07 | 1    | U | K.GTIQELGQNYAVSGEIFVVDN.N                     |
| <a href="#">10595</a> | 918 - 939   | 808.4113  | 2422.2120 | 2422.2129 | -0.37  | 0 | 24    | 0.045   | 1    | U | K.GTIQELGQNYAVSGEIFVVDN.N                     |
| <a href="#">10596</a> | 918 - 939   | 808.4113  | 2422.2122 | 2422.2129 | -0.29  | 0 | 57    | 4.3e-05 | 1    | U | K.GTIQELGQNYAVSGEIFVVDN.N                     |
| <a href="#">10598</a> | 918 - 939   | 1212.1134 | 2422.2122 | 2422.2129 | -0.26  | 0 | 36    | 0.001   | 1    | U | K.GTIQELGQNYAVSGEIFVVDN.N                     |
| <a href="#">10599</a> | 918 - 939   | 808.4114  | 2422.2123 | 2422.2129 | -0.24  | 0 | 26    | 0.024   | 1    | U | K.GTIQELGQNYAVSGEIFVVDN.N                     |
| <a href="#">10600</a> | 918 - 939   | 808.4114  | 2422.2123 | 2422.2129 | -0.21  | 0 | 19    | 0.023   | 1    | U | K.GTIQELGQNYAVSGEIFVVDN.N                     |
| <a href="#">10601</a> | 918 - 939   | 1212.1135 | 2422.2124 | 2422.2129 | -0.19  | 0 | 46    | 0.00053 | 1    | U | K.GTIQELGQNYAVSGEIFVVDN.N                     |
| <a href="#">10602</a> | 918 - 939   | 1212.1135 | 2422.2124 | 2422.2129 | -0.18  | 0 | 30    | 0.0014  | 1    | U | K.GTIQELGQNYAVSGEIFVVDN.N                     |
| <a href="#">10603</a> | 918 - 939   | 1212.1135 | 2422.2125 | 2422.2129 | -0.15  | 0 | 101   | 4.7e-09 | 1    | U | K.GTIQELGQNYAVSGEIFVVDN.N                     |
| <a href="#">10604</a> | 918 - 939   | 808.4114  | 2422.2125 | 2422.2129 | -0.14  | 0 | 18    | 0.046   | 1    | U | K.GTIQELGQNYAVSGEIFVVDN.N                     |
| <a href="#">10607</a> | 918 - 939   | 808.4115  | 2422.2126 | 2422.2129 | -0.10  | 0 | 27    | 0.028   | 1    | U | K.GTIQELGQNYAVSGEIFVVDN.N                     |
| <a href="#">10608</a> | 918 - 939   | 808.4115  | 2422.2127 | 2422.2129 | -0.065 | 0 | 26    | 0.023   | 1    | U | K.GTIQELGQNYAVSGEIFVVDN.N                     |
| <a href="#">10613</a> | 918 - 939   | 1212.1140 | 2422.2134 | 2422.2129 | 0.23   | 0 | 59    | 2e-05   | 1    | U | K.GTIQELGQNYAVSGEIFVVDN.N                     |
| <a href="#">10615</a> | 918 - 939   | 1212.1141 | 2422.2136 | 2422.2129 | 0.29   | 0 | 91    | 1.3e-08 | 1    | U | K.GTIQELGQNYAVSGEIFVVDN.N                     |
| <a href="#">10618</a> | 918 - 939   | 1212.1144 | 2422.2142 | 2422.2129 | 0.55   | 0 | 23    | 0.018   | 1    | U | K.GTIQELGQNYAVSGEIFVVDN.N                     |
| <a href="#">10619</a> | 918 - 939   | 808.4120  | 2422.2142 | 2422.2129 | 0.55   | 0 | 34    | 0.0034  | 1    | U | K.GTIQELGQNYAVSGEIFVVDN.N                     |
| <a href="#">10622</a> | 918 - 939   | 1212.1146 | 2422.2147 | 2422.2129 | 0.76   | 0 | 82    | 1.2e-07 | 1    | U | K.GTIQELGQNYAVSGEIFVVDN.N                     |
| <a href="#">10623</a> | 918 - 939   | 808.4122  | 2422.2149 | 2422.2129 | 0.85   | 0 | 56    | 0.00026 | 1    | U | K.GTIQELGQNYAVSGEIFVVDN.N                     |
| <a href="#">10624</a> | 918 - 939   | 808.4123  | 2422.2150 | 2422.2129 | 0.90   | 0 | 31    | 0.01    | 1    | U | K.GTIQELGQNYAVSGEIFVVDN.N                     |
| <a href="#">10626</a> | 918 - 939   | 808.4124  | 2422.2154 | 2422.2129 | 1.04   | 0 | 37    | 0.025   | 1    | U | K.GTIQELGQNYAVSGEIFVVDN.N                     |
| <a href="#">10627</a> | 918 - 939   | 1212.1150 | 2422.2154 | 2422.2129 | 1.06   | 0 | 43    | 0.00052 | 1    | U | K.GTIQELGQNYAVSGEIFVVDN.N                     |
| <a href="#">10628</a> | 918 - 939   | 808.4125  | 2422.2157 | 2422.2129 | 1.17   | 0 | 31    | 0.0067  | 1    | U | K.GTIQELGQNYAVSGEIFVVDN.N                     |
| <a href="#">10629</a> | 918 - 939   | 606.5612  | 2422.2159 | 2422.2129 | 1.25   | 0 | 32    | 0.0056  | 1    | U | K.GTIQELGQNYAVSGEIFVVDN.N                     |
| <a href="#">10630</a> | 918 - 939   | 1212.1153 | 2422.2160 | 2422.2129 | 1.28   | 0 | 52    | 4.4e-05 | 1    | U | K.GTIQELGQNYAVSGEIFVVDN.N                     |
| <a href="#">10631</a> | 918 - 939   | 606.5613  | 2422.2161 | 2422.2129 | 1.35   | 0 | 36    | 0.0053  | 1    | U | K.GTIQELGQNYAVSGEIFVVDN.N                     |
| <a href="#">10633</a> | 918 - 939   | 808.4128  | 2422.2167 | 2422.2129 | 1.59   | 0 | 26    | 0.016   | 1    | U | K.GTIQELGQNYAVSGEIFVVDN.N                     |
| <a href="#">10634</a> | 918 - 939   | 808.4139  | 2422.2198 | 2422.2129 | 2.86   | 0 | 31    | 0.011   | 1    | U | K.GTIQELGQNYAVSGEIFVVDN.N                     |
| <a href="#">13173</a> | 918 - 950   | 919.4792  | 3673.8875 | 3673.8952 | -2.09  | 1 | 44    | 0.0037  | 1    | U | K.GTIQELGQNYAVSGEIFVVDNRTVEITELPVR.T          |
| <a href="#">13174</a> | 918 - 950   | 919.4797  | 3673.8938 | 3673.8952 | -0.37  | 1 | 52    | 7.1e-05 | 1    | U | K.GTIQELGQNYAVSGEIFVVDNRTVEITELPVR.T          |
| <a href="#">13175</a> | 918 - 950   | 1225.6392 | 3673.8957 | 3673.8952 | 0.15   | 1 | 78    | 1.4e-06 | 1    | U | K.GTIQELGQNYAVSGEIFVVDNRTVEITELPVR.T          |
| <a href="#">13176</a> | 918 - 950   | 1225.6393 | 3673.8961 | 3673.8952 | 0.26   | 1 | 89    | 3.9e-08 | 1    | U | K.GTIQELGQNYAVSGEIFVVDNRTVEITELPVR.T          |
| <a href="#">3750</a>  | 940 - 950   | 635.8526  | 1269.6907 | 1269.6929 | -1.68  | 0 | 38    | 0.0018  | 1    | U | R.NTVEITELPVR.T                               |
| <a href="#">3751</a>  | 940 - 950   | 635.8532  | 1269.6918 | 1269.6929 | -0.84  | 0 | 67    | 1.1e-05 | 1    | U | R.NTVEITELPVR.T                               |
| <a href="#">3752</a>  | 940 - 950   | 635.8534  | 1269.6922 | 1269.6929 | -0.54  | 0 | 24    | 0.027   | 1    | U | R.NTVEITELPVR.T                               |
| <a href="#">3753</a>  | 940 - 950   | 635.8534  | 1269.6922 | 1269.6929 | -0.49  | 0 | 54    | 0.00013 | 1    | U | R.NTVEITELPVR.T                               |
| <a href="#">3754</a>  | 940 - 950   | 424.2381  | 1269.6925 | 1269.6929 | -0.28  | 0 | 46    | 0.0012  | 1    | U | R.NTVEITELPVR.T                               |
| <a href="#">3756</a>  | 940 - 950   | 635.8537  | 1269.6929 | 1269.6929 | 0.041  | 0 | 54    | 0.0002  | 1    | U | R.NTVEITELPVR.T                               |
| <a href="#">3757</a>  | 940 - 950   | 635.8538  | 1269.6929 | 1269.6929 | 0.072  | 0 | 58    | 2.7e-05 | 1    | U | R.NTVEITELPVR.T                               |
| <a href="#">3759</a>  | 940 - 950   | 635.8538  | 1269.6931 | 1269.6929 | 0.20   | 0 | 55    | 0.00018 | 1    | U | R.NTVEITELPVR.T                               |
| <a href="#">3760</a>  | 940 - 950   | 635.8538  | 1269.6931 | 1269.6929 | 0.23   | 0 | 42    | 0.00012 | 1    | U | R.NTVEITELPVR.T                               |
| <a href="#">3762</a>  | 940 - 950   | 635.8541  | 1269.6937 | 1269.6929 | 0.64   | 0 | 39    | 0.00096 | 1    | U | R.NTVEITELPVR.T                               |
| <a href="#">3763</a>  | 940 - 950   | 635.8542  | 1269.6939 | 1269.6929 | 0.83   | 0 | 48    | 0.00022 | 1    | U | R.NTVEITELPVR.T                               |
| <a href="#">3764</a>  | 940 - 950   | 635.8544  | 1269.6942 | 1269.6929 | 1.05   | 0 | 56    | 4e-05   | 1    | U | R.NTVEITELPVR.T                               |
| <a href="#">5331</a>  | 958 - 970   | 737.3663  | 1472.7181 | 1472.7181 | 0.033  | 0 | 40    | 0.0042  | 1    | U | K.EQVLEPMLNGTDK.T                             |
| <a href="#">5448</a>  | 958 - 970   | 745.3634  | 1488.7122 | 1488.7130 | -0.56  | 0 | 42    | 0.00088 | 1    | U | K.EQVLEPMLNGTDK.T<br>+ Oxidation (M)          |
| <a href="#">5449</a>  | 958 - 970   | 745.3638  | 1488.7131 | 1488.7130 | 0.048  | 0 | 57    | 4.2e-05 | 1    | U | K.EQVLEPMLNGTDK.T<br>+ Oxidation (M)          |
| <a href="#">10809</a> | 958 - 979   | 826.7517  | 2477.2332 | 2477.2359 | -1.09  | 1 | 24    | 0.044   | 1    | U | K.EQVLEPMLNGTDKTPALISDYK.E<br>+ Oxidation (M) |
| <a href="#">10810</a> | 958 - 979   | 826.7530  | 2477.2373 | 2477.2359 | 0.56   | 1 | 39    | 0.0016  | 1    | U | K.EQVLEPMLNGTDKTPALISDYK.E<br>+ Oxidation (M) |
| <a href="#">1559</a>  | 971 - 979   | 504.2730  | 1006.5313 | 1006.5335 | -2.13  | 0 | 18    | 0.034   | 1    | U | K.TPALISDYK.E                                 |
| <a href="#">1561</a>  | 971 - 979   | 504.2743  | 1006.5340 | 1006.5335 | 0.47   | 0 | 27    | 0.016   | 1    | U | K.TPALISDYK.E                                 |
| <a href="#">1562</a>  | 971 - 979   | 504.2744  | 1006.5341 | 1006.5335 | 0.65   | 0 | 36    | 0.0019  | 1    | U | K.TPALISDYK.E                                 |
| <a href="#">1563</a>  | 971 - 979   | 504.2744  | 1006.5342 | 1006.5335 | 0.75   | 0 | 31    | 0.006   | 1    | U | K.TPALISDYK.E                                 |
| <a href="#">1564</a>  | 971 - 979   | 504.2746  | 1006.5346 | 1006.5335 | 1.09   | 0 | 33    | 0.0064  | 1    | U | K.TPALISDYK.E                                 |
| <a href="#">9622</a>  | 971 - 988   | 694.6839  | 2081.0298 | 2081.0317 | -0.90  | 1 | 48    | 0.00022 | 1    | U | K.TPALISDYKEYHTDITTVK.F                       |
| <a href="#">9625</a>  | 971 - 988   | 694.6843  | 2081.0310 | 2081.0317 | -0.36  | 1 | 30    | 0.0077  | 1    | U | K.TPALISDYKEYHTDITTVK.F                       |
| <a href="#">9627</a>  | 971 - 988   | 521.2652  | 2081.0318 | 2081.0317 | 0.059  | 1 | 34    | 0.0059  | 1    | U | K.TPALISDYKEYHTDITTVK.F                       |
| <a href="#">2284</a>  | 980 - 988   | 547.2613  | 1092.5080 | 1092.5088 | -0.69  | 0 | 27    | 0.041   | 1    | U | K.EYHTDITTVK.F                                |
| <a href="#">2289</a>  | 980 - 988   | 547.2635  | 1092.5124 | 1092.5088 | 3.34   | 0 | 23    | 0.031   | 1    | U | K.EYHTDITTVK.F                                |
| <a href="#">7582</a>  | 993 - 1008  | 576.2980  | 1725.8722 | 1725.8719 | 0.18   | 1 | 35    | 0.00092 | 1    | U | K.MTEEKLAAQEAAGLHK.V                          |
| <a href="#">2397</a>  | 998 - 1008  | 554.8087  | 1107.6029 | 1107.6036 | -0.64  | 0 | 55    | 8.4e-05 | 1    | U | K.LAQEAAGLHK.V                                |
| <a href="#">2398</a>  | 998 - 1008  | 370.2083  | 1107.6030 | 1107.6036 | -0.52  | 0 | 36    | 0.011   | 1    | U | K.LAQEAAGLHK.V                                |
| <a href="#">2399</a>  | 998 - 1008  | 554.8089  | 1107.6032 | 1107.6036 | -0.37  | 0 | 42    | 0.0012  | 1    | U | K.LAQEAAGLHK.V                                |



| Query                | Start - End | Observed | Mr (expt) | Mr (calc) | ppm    | M | Score | Expect  | Rank | U | Peptide                               |
|----------------------|-------------|----------|-----------|-----------|--------|---|-------|---------|------|---|---------------------------------------|
| <a href="#">2400</a> | 998 - 1008  | 554.8090 | 1107.6034 | 1107.6036 | -0.18  | 0 | 25    | 0.015   | 1    | U | K.LAQAEAAAGLHK.V                      |
| <a href="#">2401</a> | 998 - 1008  | 370.2085 | 1107.6036 | 1107.6036 | 0.018  | 0 | 38    | 0.0063  | 1    | U | K.LAQAEAAAGLHK.V                      |
| <a href="#">2402</a> | 998 - 1008  | 554.8091 | 1107.6037 | 1107.6036 | 0.060  | 0 | 54    | 7.5e-05 | 1    | U | K.LAQAEAAAGLHK.V                      |
| <a href="#">2403</a> | 998 - 1008  | 370.2085 | 1107.6037 | 1107.6036 | 0.099  | 0 | 42    | 0.0011  | 1    | U | K.LAQAEAAAGLHK.V                      |
| <a href="#">2404</a> | 998 - 1008  | 370.2086 | 1107.6039 | 1107.6036 | 0.21   | 0 | 39    | 0.003   | 1    | U | K.LAQAEAAAGLHK.V                      |
| <a href="#">2407</a> | 998 - 1008  | 370.2088 | 1107.6046 | 1107.6036 | 0.88   | 0 | 26    | 0.03    | 1    | U | K.LAQAEAAAGLHK.V                      |
| <a href="#">3445</a> | 1032 - 1041 | 618.8449 | 1235.6753 | 1235.6761 | -0.65  | 1 | 66    | 2.9e-06 | 1    | U | K.KYETVQDILK.E                        |
| <a href="#">3448</a> | 1032 - 1041 | 618.8452 | 1235.6758 | 1235.6761 | -0.29  | 1 | 33    | 0.0021  | 1    | U | K.KYETVQDILK.E                        |
| <a href="#">3449</a> | 1032 - 1041 | 412.8992 | 1235.6758 | 1235.6761 | -0.27  | 1 | 23    | 0.02    | 1    | U | K.KYETVQDILK.E                        |
| <a href="#">3450</a> | 1032 - 1041 | 618.8453 | 1235.6761 | 1235.6761 | -0.036 | 1 | 43    | 0.00028 | 1    | U | K.KYETVQDILK.E                        |
| <a href="#">3451</a> | 1032 - 1041 | 618.8454 | 1235.6762 | 1235.6761 | 0.094  | 1 | 34    | 0.0033  | 1    | U | K.KYETVQDILK.E                        |
| <a href="#">3452</a> | 1032 - 1041 | 412.8994 | 1235.6764 | 1235.6761 | 0.24   | 1 | 40    | 0.0044  | 1    | U | K.KYETVQDILK.E                        |
| <a href="#">3453</a> | 1032 - 1041 | 618.8455 | 1235.6765 | 1235.6761 | 0.30   | 1 | 40    | 0.0014  | 1    | U | K.KYETVQDILK.E                        |
| <a href="#">3454</a> | 1032 - 1041 | 618.8456 | 1235.6765 | 1235.6761 | 0.34   | 1 | 51    | 6.6e-05 | 1    | U | K.KYETVQDILK.E                        |
| <a href="#">9473</a> | 1032 - 1047 | 682.0298 | 2043.0676 | 2043.0677 | -0.049 | 2 | 28    | 0.013   | 1    | U | K.KYETVQDILKEFFDLR.L                  |
| <a href="#">2394</a> | 1033 - 1041 | 554.7975 | 1107.5805 | 1107.5812 | -0.59  | 0 | 39    | 0.0063  | 1    | U | K.YETVQDILK.E                         |
| <a href="#">742</a>  | 1048 - 1054 | 436.2372 | 870.4598  | 870.4599  | -0.19  | 0 | 28    | 0.029   | 1    | U | R.LSYGLR.K                            |
| <a href="#">6166</a> | 1055 - 1068 | 516.9409 | 1547.8010 | 1547.8017 | -0.50  | 1 | 25    | 0.011   | 1    | U | R.KEWLVGMLGAESTK.L                    |
| <a href="#">6167</a> | 1055 - 1068 | 516.9410 | 1547.8013 | 1547.8017 | -0.27  | 1 | 26    | 0.032   | 1    | U | R.KEWLVGMLGAESTK.L                    |
| <a href="#">6168</a> | 1055 - 1068 | 516.9411 | 1547.8014 | 1547.8017 | -0.25  | 1 | 36    | 0.0013  | 1    | U | R.KEWLVGMLGAESTK.L                    |
| <a href="#">6170</a> | 1055 - 1068 | 774.9085 | 1547.8024 | 1547.8017 | 0.44   | 1 | 76    | 2e-06   | 1    | U | R.KEWLVGMLGAESTK.L                    |
| <a href="#">6304</a> | 1055 - 1068 | 782.9034 | 1563.7923 | 1563.7967 | -2.76  | 1 | 57    | 5.8e-05 | 1    | U | R.KEWLVGMLGAESTK.L<br>+ Oxidation (M) |
| <a href="#">6305</a> | 1055 - 1068 | 522.2720 | 1563.7942 | 1563.7967 | -1.57  | 1 | 29    | 0.0032  | 1    | U | R.KEWLVGMLGAESTK.L<br>+ Oxidation (M) |
| <a href="#">6306</a> | 1055 - 1068 | 522.2726 | 1563.7958 | 1563.7967 | -0.54  | 1 | 29    | 0.006   | 1    | U | R.KEWLVGMLGAESTK.L<br>+ Oxidation (M) |
| <a href="#">6307</a> | 1055 - 1068 | 522.2726 | 1563.7959 | 1563.7967 | -0.52  | 1 | 20    | 0.027   | 1    | U | R.KEWLVGMLGAESTK.L<br>+ Oxidation (M) |
| <a href="#">6308</a> | 1055 - 1068 | 782.9055 | 1563.7965 | 1563.7967 | -0.12  | 1 | 46    | 5.8e-05 | 1    | U | R.KEWLVGMLGAESTK.L<br>+ Oxidation (M) |
| <a href="#">6309</a> | 1055 - 1068 | 782.9055 | 1563.7965 | 1563.7967 | -0.11  | 1 | 64    | 4.9e-06 | 1    | U | R.KEWLVGMLGAESTK.L<br>+ Oxidation (M) |
| <a href="#">6310</a> | 1055 - 1068 | 782.9056 | 1563.7967 | 1563.7967 | 0.0045 | 1 | 68    | 7e-06   | 1    | U | R.KEWLVGMLGAESTK.L<br>+ Oxidation (M) |
| <a href="#">6311</a> | 1055 - 1068 | 522.2729 | 1563.7968 | 1563.7967 | 0.058  | 1 | 35    | 0.0032  | 1    | U | R.KEWLVGMLGAESTK.L<br>+ Oxidation (M) |
| <a href="#">6312</a> | 1055 - 1068 | 522.2729 | 1563.7968 | 1563.7967 | 0.12   | 1 | 49    | 0.00021 | 1    | U | R.KEWLVGMLGAESTK.L<br>+ Oxidation (M) |
| <a href="#">6313</a> | 1055 - 1068 | 782.9058 | 1563.7970 | 1563.7967 | 0.21   | 1 | 44    | 0.0004  | 1    | U | R.KEWLVGMLGAESTK.L<br>+ Oxidation (M) |
| <a href="#">6314</a> | 1055 - 1068 | 782.9059 | 1563.7972 | 1563.7967 | 0.32   | 1 | 63    | 6.3e-06 | 1    | U | R.KEWLVGMLGAESTK.L<br>+ Oxidation (M) |
| <a href="#">6315</a> | 1055 - 1068 | 522.2731 | 1563.7974 | 1563.7967 | 0.46   | 1 | 31    | 0.0035  | 1    | U | R.KEWLVGMLGAESTK.L<br>+ Oxidation (M) |
| <a href="#">6316</a> | 1055 - 1068 | 782.9065 | 1563.7984 | 1563.7967 | 1.09   | 1 | 46    | 0.00082 | 1    | U | R.KEWLVGMLGAESTK.L<br>+ Oxidation (M) |
| <a href="#">4823</a> | 1056 - 1068 | 710.8609 | 1419.7073 | 1419.7068 | 0.35   | 0 | 21    | 0.04    | 1    | U | K.EWLVGMLGAESTK.L                     |
| <a href="#">4825</a> | 1056 - 1068 | 710.8609 | 1419.7073 | 1419.7068 | 0.37   | 0 | 48    | 5.6e-05 | 1    | U | K.EWLVGMLGAESTK.L                     |
| <a href="#">4826</a> | 1056 - 1068 | 710.8610 | 1419.7075 | 1419.7068 | 0.48   | 0 | 33    | 0.0038  | 1    | U | K.EWLVGMLGAESTK.L                     |
| <a href="#">4827</a> | 1056 - 1068 | 474.2433 | 1419.7082 | 1419.7068 | 0.97   | 0 | 31    | 0.0036  | 1    | U | K.EWLVGMLGAESTK.L                     |
| <a href="#">4828</a> | 1056 - 1068 | 710.8614 | 1419.7082 | 1419.7068 | 1.00   | 0 | 26    | 0.0036  | 1    | U | K.EWLVGMLGAESTK.L                     |
| <a href="#">4829</a> | 1056 - 1068 | 710.8619 | 1419.7092 | 1419.7068 | 1.69   | 0 | 22    | 0.014   | 1    | U | K.EWLVGMLGAESTK.L                     |
| <a href="#">4982</a> | 1056 - 1068 | 718.8579 | 1435.7013 | 1435.7017 | -0.28  | 0 | 37    | 0.002   | 1    | U | K.EWLVGMLGAESTK.L<br>+ Oxidation (M)  |
| <a href="#">4983</a> | 1056 - 1068 | 718.8581 | 1435.7016 | 1435.7017 | -0.096 | 0 | 34    | 0.034   | 1    | U | K.EWLVGMLGAESTK.L<br>+ Oxidation (M)  |
| <a href="#">4985</a> | 1056 - 1068 | 718.8583 | 1435.7020 | 1435.7017 | 0.21   | 0 | 35    | 0.0022  | 1    | U | K.EWLVGMLGAESTK.L<br>+ Oxidation (M)  |
| <a href="#">2124</a> | 1075 - 1083 | 538.3292 | 1074.6439 | 1074.6437 | 0.22   | 1 | 37    | 0.00046 | 1    | U | R.FILEKIQGK.I                         |
| <a href="#">3523</a> | 1092 - 1101 | 415.2444 | 1242.7115 | 1242.7118 | -0.25  | 1 | 44    | 0.0015  | 1    | U | K.KDLIQMLVQR.G                        |
| <a href="#">3524</a> | 1092 - 1101 | 622.3630 | 1242.7115 | 1242.7118 | -0.24  | 1 | 59    | 4.8e-05 | 1    | U | K.KDLIQMLVQR.G                        |
| <a href="#">3660</a> | 1092 - 1101 | 630.3607 | 1258.7069 | 1258.7067 | 0.14   | 1 | 55    | 0.00013 | 1    | U | K.KDLIQMLVQR.G<br>+ Oxidation (M)     |
| <a href="#">3661</a> | 1092 - 1101 | 630.3608 | 1258.7071 | 1258.7067 | 0.30   | 1 | 51    | 0.00047 | 1    | U | K.KDLIQMLVQR.G<br>+ Oxidation (M)     |
| <a href="#">3662</a> | 1092 - 1101 | 420.5769 | 1258.7090 | 1258.7067 | 1.80   | 1 | 39    | 0.0071  | 1    | U | K.KDLIQMLVQR.G<br>+ Oxidation (M)     |
| <a href="#">2468</a> | 1093 - 1101 | 558.3152 | 1114.6159 | 1114.6169 | -0.83  | 0 | 48    | 0.00098 | 1    | U | K.DLIQMLVQR.G                         |
| <a href="#">2469</a> | 1093 - 1101 | 558.3153 | 1114.6161 | 1114.6169 | -0.69  | 0 | 48    | 0.00096 | 1    | U | K.DLIQMLVQR.G                         |
| <a href="#">2470</a> | 1093 - 1101 | 558.3157 | 1114.6168 | 1114.6169 | -0.039 | 0 | 64    | 2.2e-05 | 1    | U | K.DLIQMLVQR.G                         |
| <a href="#">2472</a> | 1093 - 1101 | 558.3158 | 1114.6171 | 1114.6169 | 0.27   | 0 | 50    | 0.00053 | 1    | U | K.DLIQMLVQR.G                         |
| <a href="#">2473</a> | 1093 - 1101 | 558.3159 | 1114.6173 | 1114.6169 | 0.41   | 0 | 39    | 0.0073  | 1    | U | K.DLIQMLVQR.G                         |
| <a href="#">2474</a> | 1093 - 1101 | 558.3162 | 1114.6177 | 1114.6169 | 0.80   | 0 | 51    | 0.00047 | 1    | U | K.DLIQMLVQR.G                         |
| <a href="#">2628</a> | 1093 - 1101 | 566.3118 | 1130.6090 | 1130.6118 | -2.46  | 0 | 33    | 0.028   | 1    | U | K.DLIQMLVQR.G<br>+ Oxidation (M)      |
| <a href="#">2629</a> | 1093 - 1101 | 566.3122 | 1130.6099 | 1130.6118 | -1.61  | 0 | 31    | 0.033   | 1    | U | K.DLIQMLVQR.G<br>+ Oxidation (M)      |
| <a href="#">2630</a> | 1093 - 1101 | 566.3130 | 1130.6114 | 1130.6118 | -0.32  | 0 | 49    | 0.00038 | 1    | U | K.DLIQMLVQR.G<br>+ Oxidation (M)      |
| <a href="#">2631</a> | 1093 - 1101 | 566.3130 | 1130.6115 | 1130.6118 | -0.25  | 0 | 48    | 0.0007  | 1    | U | K.DLIQMLVQR.G<br>+ Oxidation (M)      |
| <a href="#">2632</a> | 1093 - 1101 | 566.3132 | 1130.6122 | 1130.6118 | 0.068  | 0 | 37    | 0.0029  | 1    | U | K.DLIQMLVQR.G<br>+ Oxidation (M)      |
| <a href="#">2634</a> | 1093 - 1101 | 566.3134 | 1130.6122 | 1130.6118 | 0.40   | 0 | 54    | 0.00026 | 1    | U | K.DLIQMLVQR.G<br>+ Oxidation (M)      |
| <a href="#">2635</a> | 1093 - 1101 | 566.3134 | 1130.6123 | 1130.6118 | 0.44   | 0 | 51    | 0.00035 | 1    | U | K.DLIQMLVQR.G<br>+ Oxidation (M)      |
| <a href="#">2636</a> | 1093 - 1101 | 566.3135 | 1130.6124 | 1130.6118 | 0.53   | 0 | 50    | 0.00064 | 1    | U | K.DLIQMLVQR.G<br>+ Oxidation (M)      |
| <a href="#">2638</a> | 1093 - 1101 | 566.3138 | 1130.6130 | 1130.6118 | 1.11   | 0 | 44    | 0.0012  | 1    | U | K.DLIQMLVQR.G<br>+ Oxidation (M)      |
| <a href="#">847</a>  | 1102 - 1109 | 447.7137 | 893.4128  | 893.4131  | -0.28  | 0 | 23    | 0.011   | 1    | U | R.GYESDPVK.A                          |
| <a href="#">851</a>  | 1102 - 1109 | 447.7140 | 893.4134  | 893.4131  | 0.37   | 0 | 25    | 0.041   | 1    | U | R.GYESDPVK.A                          |
| <a href="#">1428</a> | 1157 - 1164 | 494.2895 | 986.5645  | 986.5648  | -0.25  | 1 | 39    | 0.0072  | 1    | U | K.EKVEELIK.Q                          |

| Query                 | Start - End | Observed  | Mr (expt) | Mr (calc) | ppm     | M | Score | Expect  | Rank | U | Peptide                                          |
|-----------------------|-------------|-----------|-----------|-----------|---------|---|-------|---------|------|---|--------------------------------------------------|
| <a href="#">1430</a>  | 1157 - 1164 | 494.2898  | 986.5651  | 986.5648  | 0.30    | 1 | 46    | 0.0013  | 1    | U | K.EKVEELIK.Q                                     |
| <a href="#">2229</a>  | 1170 - 1178 | 543.8043  | 1085.5941 | 1085.5941 | -0.040  | 2 | 42    | 0.0034  | 1    | U | K.GREVNDLKR.K                                    |
| <a href="#">2230</a>  | 1170 - 1178 | 362.8722  | 1085.5947 | 1085.5941 | 0.48    | 2 | 39    | 0.0075  | 1    | U | K.GREVNDLKR.K                                    |
| <a href="#">756</a>   | 1172 - 1178 | 437.2428  | 872.4711  | 872.4716  | -0.54   | 1 | 44    | 0.0022  | 1    | U | R.EVNDLKR.K                                      |
| <a href="#">533</a>   | 1180 - 1186 | 416.7135  | 831.4124  | 831.4127  | -0.28   | 0 | 27    | 0.04    | 1    | U | K.SPSDLWK.E                                      |
| <a href="#">4573</a>  | 1187 - 1198 | 689.8402  | 1377.6659 | 1377.6664 | -0.32   | 0 | 63    | 1.1e-05 | 1    | U | K.EDLAAFVEELDK.V                                 |
| <a href="#">4574</a>  | 1187 - 1198 | 689.8404  | 1377.6661 | 1377.6664 | -0.15   | 0 | 53    | 8.5e-05 | 1    | U | K.EDLAAFVEELDK.V                                 |
| <a href="#">4575</a>  | 1187 - 1198 | 689.8414  | 1377.6683 | 1377.6664 | 1.45    | 0 | 20    | 0.028   | 1    | U | K.EDLAAFVEELDK.V                                 |
| <a href="#">9727</a>  | 1187 - 1204 | 703.0101  | 2106.0084 | 2106.0117 | -1.54   | 1 | 65    | 1.2e-05 | 1    | U | K.EDLAAFVEELDKVESQER.E                           |
| <a href="#">9728</a>  | 1187 - 1204 | 703.0105  | 2106.0096 | 2106.0117 | -1.00   | 1 | 50    | 0.0003  | 1    | U | K.EDLAAFVEELDKVESQER.E                           |
| <a href="#">9729</a>  | 1187 - 1204 | 1054.0125 | 2106.0104 | 2106.0117 | -0.57   | 1 | 57    | 1.5e-05 | 1    | U | K.EDLAAFVEELDKVESQER.E                           |
| <a href="#">9730</a>  | 1187 - 1204 | 703.0109  | 2106.0110 | 2106.0117 | -0.32   | 1 | 36    | 0.0019  | 1    | U | K.EDLAAFVEELDKVESQER.E                           |
| <a href="#">9731</a>  | 1187 - 1204 | 703.0109  | 2106.0110 | 2106.0117 | -0.32   | 1 | 36    | 0.013   | 1    | U | K.EDLAAFVEELDKVESQER.E                           |
| <a href="#">9732</a>  | 1187 - 1204 | 703.0110  | 2106.0111 | 2106.0117 | -0.27   | 1 | 33    | 0.0067  | 1    | U | K.EDLAAFVEELDKVESQER.E                           |
| <a href="#">9733</a>  | 1187 - 1204 | 1054.0128 | 2106.0111 | 2106.0117 | -0.25   | 1 | 75    | 1.3e-06 | 1    | U | K.EDLAAFVEELDKVESQER.E                           |
| <a href="#">9734</a>  | 1187 - 1204 | 1054.0129 | 2106.0113 | 2106.0117 | -0.19   | 1 | 61    | 6.4e-06 | 1    | U | K.EDLAAFVEELDKVESQER.E                           |
| <a href="#">9736</a>  | 1187 - 1204 | 1054.0130 | 2106.0115 | 2106.0117 | -0.090  | 1 | 61    | 3.8e-06 | 1    | U | K.EDLAAFVEELDKVESQER.E                           |
| <a href="#">9737</a>  | 1187 - 1204 | 1054.0131 | 2106.0117 | 2106.0117 | 0.033   | 1 | 74    | 4e-07   | 1    | U | K.EDLAAFVEELDKVESQER.E                           |
| <a href="#">9738</a>  | 1187 - 1204 | 703.0112  | 2106.0117 | 2106.0117 | 0.040   | 1 | 45    | 0.00057 | 1    | U | K.EDLAAFVEELDKVESQER.E                           |
| <a href="#">9739</a>  | 1187 - 1204 | 703.0112  | 2106.0117 | 2106.0117 | 0.040   | 1 | 48    | 0.00042 | 1    | U | K.EDLAAFVEELDKVESQER.E                           |
| <a href="#">9740</a>  | 1187 - 1204 | 703.0112  | 2106.0118 | 2106.0117 | 0.054   | 1 | 50    | 0.00016 | 1    | U | K.EDLAAFVEELDKVESQER.E                           |
| <a href="#">9741</a>  | 1187 - 1204 | 703.0112  | 2106.0119 | 2106.0117 | 0.097   | 1 | 27    | 0.011   | 1    | U | K.EDLAAFVEELDKVESQER.E                           |
| <a href="#">9742</a>  | 1187 - 1204 | 1054.0133 | 2106.0121 | 2106.0117 | 0.19    | 1 | 76    | 3.4e-07 | 1    | U | K.EDLAAFVEELDKVESQER.E                           |
| <a href="#">9743</a>  | 1187 - 1204 | 703.0113  | 2106.0121 | 2106.0117 | 0.20    | 1 | 46    | 0.0012  | 1    | U | K.EDLAAFVEELDKVESQER.E                           |
| <a href="#">9744</a>  | 1187 - 1204 | 703.0113  | 2106.0121 | 2106.0117 | 0.23    | 1 | 68    | 5e-06   | 1    | U | K.EDLAAFVEELDKVESQER.E                           |
| <a href="#">9745</a>  | 1187 - 1204 | 703.0113  | 2106.0122 | 2106.0117 | 0.25    | 1 | 42    | 0.0023  | 1    | U | K.EDLAAFVEELDKVESQER.E                           |
| <a href="#">9746</a>  | 1187 - 1204 | 703.0114  | 2106.0123 | 2106.0117 | 0.28    | 1 | 47    | 0.00049 | 1    | U | K.EDLAAFVEELDKVESQER.E                           |
| <a href="#">9748</a>  | 1187 - 1204 | 1054.0138 | 2106.0130 | 2106.0117 | 0.63    | 1 | 65    | 6.7e-06 | 1    | U | K.EDLAAFVEELDKVESQER.E                           |
| <a href="#">9749</a>  | 1187 - 1204 | 703.0118  | 2106.0135 | 2106.0117 | 0.85    | 1 | 32    | 0.0076  | 1    | U | K.EDLAAFVEELDKVESQER.E                           |
| <a href="#">9750</a>  | 1187 - 1204 | 1054.0209 | 2106.0272 | 2106.0117 | 7.36    | 1 | 64    | 2.7e-05 | 1    | U | K.EDLAAFVEELDKVESQER.E                           |
| <a href="#">12217</a> | 1187 - 1214 | 1032.1675 | 3093.4808 | 3093.4812 | -0.13   | 2 | 65    | 2.5e-05 | 1    | U | K.EDLAAFVEELDKVESQEREDVLAGMSGK.A                 |
| <a href="#">12218</a> | 1187 - 1214 | 1032.1680 | 3093.4823 | 3093.4812 | 0.35    | 2 | 46    | 0.0004  | 1    | U | K.EDLAAFVEELDKVESQEREDVLAGMSGK.A                 |
| <a href="#">12220</a> | 1187 - 1214 | 1032.1686 | 3093.4841 | 3093.4812 | 0.94    | 2 | 32    | 0.0068  | 1    | U | K.EDLAAFVEELDKVESQEREDVLAGMSGK.A                 |
| <a href="#">12257</a> | 1187 - 1214 | 1037.4990 | 3109.4752 | 3109.4761 | -0.30   | 2 | 41    | 0.0013  | 1    | U | K.EDLAAFVEELDKVESQEREDVLAGMSGK.A + Oxidation (M) |
| <a href="#">12258</a> | 1187 - 1214 | 1037.4991 | 3109.4755 | 3109.4761 | -0.20   | 2 | 46    | 0.0011  | 1    | U | K.EDLAAFVEELDKVESQEREDVLAGMSGK.A + Oxidation (M) |
| <a href="#">12259</a> | 1187 - 1214 | 1037.4992 | 3109.4759 | 3109.4761 | -0.069  | 2 | 41    | 0.0012  | 1    | U | K.EDLAAFVEELDKVESQEREDVLAGMSGK.A + Oxidation (M) |
| <a href="#">12260</a> | 1187 - 1214 | 1037.4995 | 3109.4767 | 3109.4761 | 0.20    | 2 | 58    | 2.1e-05 | 1    | U | K.EDLAAFVEELDKVESQEREDVLAGMSGK.A + Oxidation (M) |
| <a href="#">12262</a> | 1187 - 1214 | 1037.5002 | 3109.4788 | 3109.4761 | 0.86    | 2 | 34    | 0.0066  | 1    | U | K.EDLAAFVEELDKVESQEREDVLAGMSGK.A + Oxidation (M) |
| <a href="#">7661</a>  | 1199 - 1214 | 867.9201  | 1733.8257 | 1733.8254 | 0.18    | 1 | 57    | 1.9e-05 | 1    | U | K.VESQEREDVLAGMSGK.A                             |
| <a href="#">7662</a>  | 1199 - 1214 | 578.9494  | 1733.8263 | 1733.8254 | 0.53    | 1 | 40    | 0.0033  | 1    | U | K.VESQEREDVLAGMSGK.A                             |
| <a href="#">7663</a>  | 1199 - 1214 | 867.9207  | 1733.8269 | 1733.8254 | 0.88    | 1 | 74    | 5.5e-07 | 1    | U | K.VESQEREDVLAGMSGK.A                             |
| <a href="#">7789</a>  | 1199 - 1214 | 584.2806  | 1749.8201 | 1749.8203 | -0.14   | 1 | 49    | 0.00026 | 1    | U | K.VESQEREDVLAGMSGK.A + Oxidation (M)             |
| <a href="#">7790</a>  | 1199 - 1214 | 875.9174  | 1749.8203 | 1749.8203 | -0.0023 | 1 | 51    | 0.00016 | 1    | U | K.VESQEREDVLAGMSGK.A + Oxidation (M)             |
| <a href="#">7793</a>  | 1199 - 1214 | 875.9177  | 1749.8208 | 1749.8203 | 0.28    | 1 | 62    | 1.5e-05 | 1    | U | K.VESQEREDVLAGMSGK.A + Oxidation (M)             |
| <a href="#">7794</a>  | 1199 - 1214 | 584.2812  | 1749.8219 | 1749.8203 | 0.89    | 1 | 27    | 0.03    | 1    | U | K.VESQEREDVLAGMSGK.A + Oxidation (M)             |
| <a href="#">1551</a>  | 1205 - 1214 | 503.7475  | 1005.4805 | 1005.4801 | 0.44    | 0 | 56    | 3.6e-05 | 1    | U | R.EDVLAGMSGK.A                                   |
| <a href="#">1672</a>  | 1205 - 1214 | 511.7441  | 1021.4737 | 1021.4750 | -1.25   | 0 | 54    | 9.8e-05 | 1    | U | R.EDVLAGMSGK.A + Oxidation (M)                   |
| <a href="#">1673</a>  | 1205 - 1214 | 511.7444  | 1021.4742 | 1021.4750 | -0.76   | 0 | 53    | 0.00011 | 1    | U | R.EDVLAGMSGK.A + Oxidation (M)                   |
| <a href="#">1674</a>  | 1205 - 1214 | 511.7446  | 1021.4747 | 1021.4750 | -0.27   | 0 | 58    | 2.8e-05 | 1    | U | R.EDVLAGMSGK.A + Oxidation (M)                   |
| <a href="#">1675</a>  | 1205 - 1214 | 511.7446  | 1021.4747 | 1021.4750 | -0.25   | 0 | 38    | 0.0032  | 1    | U | R.EDVLAGMSGK.A + Oxidation (M)                   |
| <a href="#">1676</a>  | 1205 - 1214 | 511.7447  | 1021.4749 | 1021.4750 | -0.096  | 0 | 52    | 0.00016 | 1    | U | R.EDVLAGMSGK.A + Oxidation (M)                   |
| <a href="#">1677</a>  | 1205 - 1214 | 511.7448  | 1021.4750 | 1021.4750 | 0.0020  | 0 | 46    | 0.00032 | 1    | U | R.EDVLAGMSGK.A + Oxidation (M)                   |
| <a href="#">1678</a>  | 1205 - 1214 | 511.7448  | 1021.4751 | 1021.4750 | 0.080   | 0 | 52    | 0.00015 | 1    | U | R.EDVLAGMSGK.A + Oxidation (M)                   |
| <a href="#">6952</a>  | 1227 - 1240 | 824.9216  | 1647.8286 | 1647.8290 | -0.27   | 1 | 79    | 2.3e-07 | 1    | U | K.KLQLEETMPSYGR.R                                |
| <a href="#">7043</a>  | 1227 - 1240 | 832.9186  | 1663.8225 | 1663.8239 | -0.83   | 1 | 54    | 3.2e-05 | 1    | U | K.KLQLEETMPSYGR.R + Oxidation (M)                |
| <a href="#">7044</a>  | 1227 - 1240 | 832.9187  | 1663.8228 | 1663.8239 | -0.66   | 1 | 71    | 5.9e-07 | 1    | U | K.KLQLEETMPSYGR.R + Oxidation (M)                |
| <a href="#">7045</a>  | 1227 - 1240 | 832.9188  | 1663.8231 | 1663.8239 | -0.49   | 1 | 67    | 1.1e-06 | 1    | U | K.KLQLEETMPSYGR.R + Oxidation (M)                |
| <a href="#">7046</a>  | 1227 - 1240 | 832.9189  | 1663.8232 | 1663.8239 | -0.42   | 1 | 62    | 4.9e-06 | 1    | U | K.KLQLEETMPSYGR.R + Oxidation (M)                |
| <a href="#">7047</a>  | 1227 - 1240 | 555.6151  | 1663.8235 | 1663.8239 | -0.26   | 1 | 23    | 0.016   | 1    | U | K.KLQLEETMPSYGR.R + Oxidation (M)                |
| <a href="#">7049</a>  | 1227 - 1240 | 555.6153  | 1663.8242 | 1663.8239 | 0.14    | 1 | 29    | 0.014   | 1    | U | K.KLQLEETMPSYGR.R + Oxidation (M)                |
| <a href="#">7050</a>  | 1227 - 1240 | 832.9194  | 1663.8243 | 1663.8239 | 0.20    | 1 | 59    | 6.9e-06 | 1    | U | K.KLQLEETMPSYGR.R + Oxidation (M)                |
| <a href="#">7051</a>  | 1227 - 1240 | 832.9195  | 1663.8244 | 1663.8239 | 0.28    | 1 | 52    | 5.5e-05 | 1    | U | K.KLQLEETMPSYGR.R + Oxidation (M)                |
| <a href="#">7052</a>  | 1227 - 1240 | 555.6155  | 1663.8247 | 1663.8239 | 0.45    | 1 | 23    | 0.023   | 1    | U | K.KLQLEETMPSYGR.R + Oxidation (M)                |
| <a href="#">7054</a>  | 1227 - 1240 | 555.6156  | 1663.8251 | 1663.8239 | 0.70    | 1 | 33    | 0.0047  | 1    | U | K.KLQLEETMPSYGR.R + Oxidation (M)                |
| <a href="#">7055</a>  | 1227 - 1240 | 832.9199  | 1663.8252 | 1663.8239 | 0.78    | 1 | 76    | 4.4e-07 | 1    | U | K.KLQLEETMPSYGR.R + Oxidation (M)                |
| <a href="#">7056</a>  | 1227 - 1240 | 832.9201  | 1663.8257 | 1663.8239 | 1.07    | 1 | 78    | 2.8e-07 | 1    | U | K.KLQLEETMPSYGR.R + Oxidation (M)                |
| <a href="#">5803</a>  | 1228 - 1240 | 507.5850  | 1519.7331 | 1519.7341 | -0.64   | 0 | 27    | 0.018   | 1    | U | K.LQLEETMPSYGR.R                                 |

| Query                 | Start - End | Observed  | Mr (expt) | Mr (calc) | ppm    | M | Score | Expect  | Rank | U | Peptide                                         |
|-----------------------|-------------|-----------|-----------|-----------|--------|---|-------|---------|------|---|-------------------------------------------------|
| <a href="#">5804</a>  | 1228 - 1240 | 760.8738  | 1519.7331 | 1519.7341 | -0.62  | 0 | 65    | 1.3e-06 | 1    | U | K.LQLEETMPSPYGR.R                               |
| <a href="#">5806</a>  | 1228 - 1240 | 760.8771  | 1519.7396 | 1519.7341 | 3.64   | 0 | 41    | 0.00015 | 1    | U | K.LQLEETMPSPYGR.R                               |
| <a href="#">5807</a>  | 1228 - 1240 | 760.8771  | 1519.7397 | 1519.7341 | 3.72   | 0 | 37    | 0.00065 | 1    | U | K.LQLEETMPSPYGR.R                               |
| <a href="#">6018</a>  | 1228 - 1240 | 768.8703  | 1535.7260 | 1535.7290 | -1.90  | 0 | 66    | 3.6e-06 | 1    | U | K.LQLEETMPSPYGR.R<br>+ Oxidation (M)            |
| <a href="#">6019</a>  | 1228 - 1240 | 768.8707  | 1535.7268 | 1535.7290 | -1.44  | 0 | 41    | 0.00055 | 1    | U | K.LQLEETMPSPYGR.R<br>+ Oxidation (M)            |
| <a href="#">6020</a>  | 1228 - 1240 | 768.8714  | 1535.7283 | 1535.7290 | -0.43  | 0 | 55    | 4.6e-05 | 1    | U | K.LQLEETMPSPYGR.R<br>+ Oxidation (M)            |
| <a href="#">6021</a>  | 1228 - 1240 | 768.8714  | 1535.7283 | 1535.7290 | -0.42  | 0 | 48    | 0.00017 | 1    | U | K.LQLEETMPSPYGR.R<br>+ Oxidation (M)            |
| <a href="#">6022</a>  | 1228 - 1240 | 768.8717  | 1535.7289 | 1535.7290 | -0.029 | 0 | 61    | 5.1e-06 | 1    | U | K.LQLEETMPSPYGR.R<br>+ Oxidation (M)            |
| <a href="#">6024</a>  | 1228 - 1240 | 768.8718  | 1535.7290 | 1535.7290 | 0.036  | 0 | 64    | 2.5e-06 | 1    | U | K.LQLEETMPSPYGR.R<br>+ Oxidation (M)            |
| <a href="#">6025</a>  | 1228 - 1240 | 768.8719  | 1535.7292 | 1535.7290 | 0.18   | 0 | 83    | 7.5e-08 | 1    | U | K.LQLEETMPSPYGR.R<br>+ Oxidation (M)            |
| <a href="#">2998</a>  | 1241 - 1250 | 586.3470  | 1170.6794 | 1170.6794 |        | 1 | 50    | 0.00012 | 1    | U | R.RIPEITAMK.A                                   |
| <a href="#">2999</a>  | 1241 - 1250 | 391.2338  | 1170.6797 | 1170.6794 | 0.25   | 1 | 39    | 0.00074 | 1    | U | R.RIPEITAMK.A                                   |
| <a href="#">3000</a>  | 1241 - 1250 | 586.3475  | 1170.6804 | 1170.6794 | 0.82   | 1 | 22    | 0.0081  | 1    | U | R.RIPEITAMK.A                                   |
| <a href="#">3099</a>  | 1241 - 1250 | 594.3434  | 1186.6722 | 1186.6743 | -1.82  | 1 | 21    | 0.015   | 1    | U | R.RIPEITAMK.A<br>+ Oxidation (M)                |
| <a href="#">3101</a>  | 1241 - 1250 | 594.3441  | 1186.6736 | 1186.6743 | -0.61  | 1 | 29    | 0.0035  | 1    | U | R.RIPEITAMK.A<br>+ Oxidation (M)                |
| <a href="#">3102</a>  | 1241 - 1250 | 396.5652  | 1186.6738 | 1186.6743 | -0.48  | 1 | 34    | 0.0015  | 1    | U | R.RIPEITAMK.A<br>+ Oxidation (M)                |
| <a href="#">3103</a>  | 1241 - 1250 | 594.3445  | 1186.6744 | 1186.6743 | 0.051  | 1 | 35    | 0.0011  | 1    | U | R.RIPEITAMK.A<br>+ Oxidation (M)                |
| <a href="#">3104</a>  | 1241 - 1250 | 396.5655  | 1186.6746 | 1186.6743 | 0.20   | 1 | 25    | 0.0055  | 1    | U | R.RIPEITAMK.A<br>+ Oxidation (M)                |
| <a href="#">3105</a>  | 1241 - 1250 | 594.3446  | 1186.6746 | 1186.6743 | 0.24   | 1 | 37    | 0.0005  | 1    | U | R.RIPEITAMK.A<br>+ Oxidation (M)                |
| <a href="#">3106</a>  | 1241 - 1250 | 396.5655  | 1186.6747 | 1186.6743 | 0.32   | 1 | 15    | 0.045   | 1    | U | R.RIPEITAMK.A<br>+ Oxidation (M)                |
| <a href="#">3107</a>  | 1241 - 1250 | 594.3446  | 1186.6747 | 1186.6743 | 0.34   | 1 | 36    | 0.00088 | 1    | U | R.RIPEITAMK.A<br>+ Oxidation (M)                |
| <a href="#">1753</a>  | 1242 - 1250 | 516.2937  | 1030.5728 | 1030.5732 | -0.42  | 0 | 36    | 0.018   | 1    | U | R.IIPEITAMK.A<br>+ Oxidation (M)                |
| <a href="#">2760</a>  | 1261 - 1271 | 382.5557  | 1144.6452 | 1144.6452 | -0.017 | 2 | 22    | 0.04    | 1    | U | K.KGDLDTAAVK.V                                  |
| <a href="#">2762</a>  | 1261 - 1271 | 573.3301  | 1144.6456 | 1144.6452 | 0.36   | 2 | 57    | 6.5e-05 | 1    | U | K.KGDLDTAAVK.V                                  |
| <a href="#">1646</a>  | 1262 - 1271 | 509.2820  | 1016.5495 | 1016.5502 | -0.66  | 1 | 31    | 0.05    | 1    | U | K.KGDLDTAAVK.V                                  |
| <a href="#">1647</a>  | 1262 - 1271 | 509.2825  | 1016.5505 | 1016.5502 | 0.27   | 1 | 39    | 0.0041  | 1    | U | K.KGDLDTAAVK.V                                  |
| <a href="#">1648</a>  | 1262 - 1271 | 509.2825  | 1016.5505 | 1016.5502 | 0.29   | 1 | 42    | 0.0032  | 1    | U | K.KGDLDTAAVK.V                                  |
| <a href="#">1649</a>  | 1262 - 1271 | 509.2826  | 1016.5506 | 1016.5502 | 0.42   | 1 | 53    | 0.00019 | 1    | U | K.KGDLDTAAVK.V                                  |
| <a href="#">1650</a>  | 1262 - 1271 | 509.2826  | 1016.5507 | 1016.5502 | 0.50   | 1 | 58    | 8e-05   | 1    | U | K.KGDLDTAAVK.V                                  |
| <a href="#">1651</a>  | 1262 - 1271 | 509.2828  | 1016.5511 | 1016.5502 | 0.86   | 1 | 53    | 0.00023 | 1    | U | K.KGDLDTAAVK.V                                  |
| <a href="#">834</a>   | 1263 - 1271 | 445.2344  | 888.4542  | 888.4553  | -1.19  | 0 | 50    | 0.00066 | 1    | U | K.GDLDTAAVK.V                                   |
| <a href="#">13271</a> | 1263 - 1299 | 947.9647  | 3787.8296 | 3787.8316 | -0.54  | 1 | 29    | 0.022   | 1    | U | K.GDLDTAAVKVEFDEEFGAPVEGAGEEALTPSPINK.G         |
| <a href="#">11697</a> | 1272 - 1299 | 973.4682  | 2917.3826 | 2917.3869 | -1.47  | 0 | 58    | 1.6e-05 | 1    | U | K.VEFDEEFGAPVEGAGEEALTPSPINK.G                  |
| <a href="#">11701</a> | 1272 - 1299 | 973.4687  | 2917.3843 | 2917.3869 | -0.90  | 0 | 45    | 0.0003  | 1    | U | K.VEFDEEFGAPVEGAGEEALTPSPINK.G                  |
| <a href="#">11704</a> | 1272 - 1299 | 973.4691  | 2917.3854 | 2917.3869 | -0.52  | 0 | 26    | 0.022   | 1    | U | K.VEFDEEFGAPVEGAGEEALTPSPINK.G                  |
| <a href="#">11705</a> | 1272 - 1299 | 973.4691  | 2917.3854 | 2917.3869 | -0.51  | 0 | 21    | 0.024   | 1    | U | K.VEFDEEFGAPVEGAGEEALTPSPINK.G                  |
| <a href="#">11709</a> | 1272 - 1299 | 973.4693  | 2917.3860 | 2917.3869 | -0.32  | 0 | 24    | 0.029   | 1    | U | K.VEFDEEFGAPVEGAGEEALTPSPINK.G                  |
| <a href="#">11712</a> | 1272 - 1299 | 973.4694  | 2917.3865 | 2917.3869 | -0.15  | 0 | 57    | 9.2e-05 | 1    | U | K.VEFDEEFGAPVEGAGEEALTPSPINK.G                  |
| <a href="#">11716</a> | 1272 - 1299 | 973.4697  | 2917.3874 | 2917.3869 | 0.16   | 0 | 53    | 5.5e-05 | 1    | U | K.VEFDEEFGAPVEGAGEEALTPSPINK.G                  |
| <a href="#">11717</a> | 1272 - 1299 | 973.4698  | 2917.3874 | 2917.3869 | 0.18   | 0 | 33    | 0.012   | 1    | U | K.VEFDEEFGAPVEGAGEEALTPSPINK.G                  |
| <a href="#">11718</a> | 1272 - 1299 | 973.4698  | 2917.3876 | 2917.3869 | 0.24   | 0 | 44    | 0.00087 | 1    | U | K.VEFDEEFGAPVEGAGEEALTPSPINK.G                  |
| <a href="#">11719</a> | 1272 - 1299 | 973.4699  | 2917.3878 | 2917.3869 | 0.29   | 0 | 36    | 0.0026  | 1    | U | K.VEFDEEFGAPVEGAGEEALTPSPINK.G                  |
| <a href="#">11721</a> | 1272 - 1299 | 973.4700  | 2917.3881 | 2917.3869 | 0.41   | 0 | 26    | 0.036   | 1    | U | K.VEFDEEFGAPVEGAGEEALTPSPINK.G                  |
| <a href="#">11724</a> | 1272 - 1299 | 973.4703  | 2917.3890 | 2917.3869 | 0.72   | 0 | 50    | 0.0001  | 1    | U | K.VEFDEEFGAPVEGAGEEALTPSPINK.G                  |
| <a href="#">11730</a> | 1272 - 1299 | 973.4709  | 2917.3910 | 2917.3869 | 1.40   | 0 | 23    | 0.038   | 1    | U | K.VEFDEEFGAPVEGAGEEALTPSPINK.G                  |
| <a href="#">11731</a> | 1272 - 1299 | 1459.7034 | 2917.3923 | 2917.3869 | 1.87   | 0 | 80    | 5.4e-07 | 1    | U | K.VEFDEEFGAPVEGAGEEALTPSPINK.G                  |
| <a href="#">11732</a> | 1272 - 1299 | 973.4714  | 2917.3925 | 2917.3869 | 1.93   | 0 | 46    | 0.00076 | 1    | U | K.VEFDEEFGAPVEGAGEEALTPSPINK.G                  |
| <a href="#">5865</a>  | 1314 - 1327 | 508.6025  | 1522.7857 | 1522.7868 | -0.74  | 2 | 20    | 0.027   | 1    | U | R.VRKTPTSSGKPSAK.K<br>+ Phospho (ST)            |
| <a href="#">3122</a>  | 1316 - 1327 | 396.8909  | 1187.6508 | 1187.6510 | -0.15  | 1 | 35    | 0.0061  | 1    | U | R.KTPTSSGKPSAK.K                                |
| <a href="#">3124</a>  | 1316 - 1327 | 594.8328  | 1187.6511 | 1187.6510 | 0.14   | 1 | 42    | 0.0025  | 1    | U | R.KTPTSSGKPSAK.K                                |
| <a href="#">3125</a>  | 1316 - 1327 | 594.8334  | 1187.6521 | 1187.6510 | 0.98   | 1 | 41    | 0.0016  | 1    | U | R.KTPTSSGKPSAK.K                                |
| <a href="#">1990</a>  | 1317 - 1327 | 354.1924  | 1059.5555 | 1059.5560 | -0.48  | 0 | 26    | 0.042   | 1    | U | K.TPTSSGKPSAK.K                                 |
| <a href="#">1992</a>  | 1317 - 1327 | 530.7853  | 1059.5561 | 1059.5560 | 0.055  | 0 | 34    | 0.0053  | 1    | U | K.TPTSSGKPSAK.K                                 |
| <a href="#">1993</a>  | 1317 - 1327 | 530.7854  | 1059.5562 | 1059.5560 | 0.17   | 0 | 42    | 0.0017  | 1    | U | K.TPTSSGKPSAK.K                                 |
| <a href="#">1994</a>  | 1317 - 1327 | 354.1927  | 1059.5563 | 1059.5560 | 0.23   | 0 | 31    | 0.013   | 1    | U | K.TPTSSGKPSAK.K                                 |
| <a href="#">3431</a>  | 1332 - 1341 | 617.2786  | 1232.5426 | 1232.5422 | 0.38   | 1 | 33    | 0.0063  | 1    | U | K.RNPWSDDESK.S                                  |
| <a href="#">4109</a>  | 1332 - 1341 | 657.2611  | 1312.5077 | 1312.5085 | -0.58  | 1 | 29    | 0.0057  | 1    | U | K.RNPWSDDESK.S<br>+ Phospho (ST)                |
| <a href="#">11691</a> | 1332 - 1356 | 972.1285  | 2913.3636 | 2913.3628 | 0.26   | 2 | 81    | 8.2e-08 | 1    | U | K.RNPWSDDESKSESDLEETEPVVIPR.D                   |
| <a href="#">12001</a> | 1332 - 1356 | 998.7823  | 2993.3251 | 2993.3291 | -1.35  | 2 | 67    | 4.3e-06 | 1    | U | K.RNPWSDDESKSESDLEETEPVVIPR.D<br>+ Phospho (ST) |
| <a href="#">12002</a> | 1332 - 1356 | 998.7832  | 2993.3278 | 2993.3291 | -0.43  | 2 | 49    | 0.00033 | 1    | U | K.RNPWSDDESKSESDLEETEPVVIPR.D<br>+ Phospho (ST) |
| <a href="#">12003</a> | 1332 - 1356 | 998.7844  | 2993.3314 | 2993.3291 | 0.76   | 2 | 52    | 0.00025 | 1    | U | K.RNPWSDDESKSESDLEETEPVVIPR.D<br>+ Phospho (ST) |
| <a href="#">2135</a>  | 1333 - 1341 | 539.2280  | 1076.4415 | 1076.4411 | 0.38   | 0 | 35    | 0.00058 | 1    | U | R.NPWSDDDESK.S                                  |
| <a href="#">11396</a> | 1333 - 1356 | 920.0943  | 2757.2611 | 2757.2617 | -0.22  | 1 | 49    | 0.00013 | 1    | U | R.NPWSDDDESKSESDLEETEPVVIPR.D                   |
| <a href="#">11397</a> | 1333 - 1356 | 690.3229  | 2757.2624 | 2757.2617 | 0.25   | 1 | 49    | 0.00022 | 1    | U | R.NPWSDDDESKSESDLEETEPVVIPR.D                   |
| <a href="#">11398</a> | 1333 - 1356 | 920.0948  | 2757.2627 | 2757.2617 | 0.35   | 1 | 29    | 0.008   | 1    | U | R.NPWSDDDESKSESDLEETEPVVIPR.D                   |
| <a href="#">11586</a> | 1333 - 1356 | 946.7492  | 2837.2258 | 2837.2280 | -0.78  | 1 | 34    | 0.0099  | 1    | U | R.NPWSDDDESKSESDLEETEPVVIPR.D<br>+ Phospho (ST) |
| <a href="#">11587</a> | 1333 - 1356 | 946.7494  | 2837.2263 | 2837.2280 | -0.60  | 1 | 44    | 0.0013  | 1    | U | R.NPWSDDDESKSESDLEETEPVVIPR.D<br>+ Phospho (ST) |
| <a href="#">11588</a> | 1333 - 1356 | 946.7506  | 2837.2301 | 2837.2280 | 0.72   | 1 | 60    | 7e-05   | 1    | U | R.NPWSDDDESKSESDLEETEPVVIPR.D<br>+ Phospho (ST) |
| <a href="#">7375</a>  | 1342 - 1356 | 850.4221  | 1698.8296 | 1698.8312 | -0.93  | 0 | 70    | 9.6e-06 | 1    | U | K.SESDLEETEPVVIPR.D                             |
| <a href="#">7376</a>  | 1342 - 1356 | 567.2839  | 1698.8298 | 1698.8312 | -0.83  | 0 | 31    | 0.026   | 1    | U | K.SESDLEETEPVVIPR.D                             |
| <a href="#">878</a>   | 1362 - 1369 | 449.7647  | 897.5148  | 897.5144  | 0.49   | 1 | 25    | 0.044   | 1    | U | R.RAAERPK.Y                                     |

| Query                 | Start - End | Observed  | Mr (expt) | Mr (calc) | ppm     | M | Score | Expect  | Rank | U | Peptide                                                |
|-----------------------|-------------|-----------|-----------|-----------|---------|---|-------|---------|------|---|--------------------------------------------------------|
| <a href="#">160</a>   | 1363 - 1369 | 371.7141  | 741.4136  | 741.4133  | 0.42    | 0 | 35    | 0.0018  | 1    | U | R.AAAERPK.Y                                            |
| <a href="#">12534</a> | 1370 - 1396 | 1076.7362 | 3227.1867 | 3227.1858 | 0.26    | 0 | 45    | 0.00014 | 1    | U | K.YTFDFSEEDDDDDDDNNLLEELK.V                            |
| <a href="#">12535</a> | 1370 - 1396 | 1076.7363 | 3227.1870 | 3227.1858 | 0.37    | 0 | 45    | 0.00024 | 1    | U | K.YTFDFSEEDDDDDDDNNLLEELK.V                            |
| <a href="#">10543</a> | 1397 - 1418 | 805.0304  | 2412.0694 | 2412.0734 | -1.65   | 1 | 41    | 0.00056 | 1    | U | K.VKASPIITNDGEDEFVPSDGLDK.D<br>+ Phospho (ST)          |
| <a href="#">10544</a> | 1397 - 1418 | 805.0310  | 2412.0712 | 2412.0734 | -0.89   | 1 | 39    | 0.001   | 1    | U | K.VKASPIITNDGEDEFVPSDGLDK.D<br>+ Phospho (ST)          |
| <a href="#">12912</a> | 1397 - 1427 | 860.1374  | 3436.5205 | 3436.5236 | -0.90   | 2 | 49    | 0.00032 | 1    | U | K.VKASPIITNDGEDEFVPSDGLDKDEYTFSPGK.S<br>+ Phospho (ST) |
| <a href="#">12913</a> | 1397 - 1427 | 860.1376  | 3436.5215 | 3436.5236 | -0.60   | 2 | 39    | 0.0051  | 1    | U | K.VKASPIITNDGEDEFVPSDGLDKDEYTFSPGK.S<br>+ Phospho (ST) |
| <a href="#">12914</a> | 1397 - 1427 | 1146.5148 | 3436.5226 | 3436.5236 | -0.28   | 2 | 67    | 2.7e-05 | 1    | U | K.VKASPIITNDGEDEFVPSDGLDKDEYTFSPGK.S<br>+ Phospho (ST) |
| <a href="#">12915</a> | 1397 - 1427 | 860.1379  | 3436.5226 | 3436.5236 | -0.27   | 2 | 45    | 0.0014  | 1    | U | K.VKASPIITNDGEDEFVPSDGLDKDEYTFSPGK.S<br>+ Phospho (ST) |
| <a href="#">12916</a> | 1397 - 1427 | 860.1381  | 3436.5233 | 3436.5236 | -0.077  | 2 | 54    | 0.00022 | 1    | U | K.VKASPIITNDGEDEFVPSDGLDKDEYTFSPGK.S<br>+ Phospho (ST) |
| <a href="#">12917</a> | 1397 - 1427 | 1146.5153 | 3436.5240 | 3436.5236 | 0.12    | 2 | 46    | 0.00081 | 1    | U | K.VKASPIITNDGEDEFVPSDGLDKDEYTFSPGK.S<br>+ Phospho (ST) |
| <a href="#">12918</a> | 1397 - 1427 | 860.1386  | 3436.5251 | 3436.5236 | 0.45    | 2 | 55    | 0.00015 | 1    | U | K.VKASPIITNDGEDEFVPSDGLDKDEYTFSPGK.S<br>+ Phospho (ST) |
| <a href="#">12919</a> | 1397 - 1427 | 860.1387  | 3436.5257 | 3436.5236 | 0.61    | 2 | 38    | 0.0042  | 1    | U | K.VKASPIITNDGEDEFVPSDGLDKDEYTFSPGK.S<br>+ Phospho (ST) |
| <a href="#">12920</a> | 1397 - 1427 | 860.1387  | 3436.5257 | 3436.5236 | 0.63    | 2 | 53    | 0.0002  | 1    | U | K.VKASPIITNDGEDEFVPSDGLDKDEYTFSPGK.S<br>+ Phospho (ST) |
| <a href="#">9717</a>  | 1399 - 1418 | 1053.4788 | 2104.9431 | 2104.9437 | -0.26   | 0 | 86    | 1.9e-07 | 1    | U | K.ASPIITNDGEDEFVPSDGLDK.D                              |
| <a href="#">12325</a> | 1399 - 1427 | 1044.1378 | 3129.3916 | 3129.3939 | -0.71   | 1 | 80    | 1.5e-06 | 1    | U | K.ASPIITNDGEDEFVPSDGLDKDEYTFSPGK.S                     |
| <a href="#">12328</a> | 1399 - 1427 | 1044.1388 | 3129.3946 | 3129.3939 | 0.23    | 1 | 84    | 1.1e-07 | 1    | U | K.ASPIITNDGEDEFVPSDGLDKDEYTFSPGK.S                     |
| <a href="#">12499</a> | 1399 - 1427 | 1070.7929 | 3209.3568 | 3209.3602 | -1.07   | 1 | 71    | 3.6e-06 | 1    | U | K.ASPIITNDGEDEFVPSDGLDKDEYTFSPGK.S<br>+ Phospho (ST)   |
| <a href="#">12500</a> | 1399 - 1427 | 1070.7938 | 3209.3597 | 3209.3602 | -0.16   | 1 | 86    | 6.3e-08 | 1    | U | K.ASPIITNDGEDEFVPSDGLDKDEYTFSPGK.S<br>+ Phospho (ST)   |
| <a href="#">12501</a> | 1399 - 1427 | 1070.7943 | 3209.3610 | 3209.3602 | 0.25    | 1 | 28    | 0.024   | 1    | U | K.ASPIITNDGEDEFVPSDGLDKDEYTFSPGK.S<br>+ Phospho (ST)   |
| <a href="#">1830</a>  | 1419 - 1427 | 522.2374  | 1042.4601 | 1042.4607 | -0.57   | 0 | 36    | 0.0016  | 1    | U | K.DEYTFSPGK.S                                          |
| <a href="#">9292</a>  | 1440 - 1456 | 990.4790  | 1978.9435 | 1978.9425 | 0.50    | 1 | 100   | 2.3e-09 | 1    | U | K.KSQDFGNLFSFPSYSQK.S                                  |
| <a href="#">9293</a>  | 1440 - 1456 | 660.6551  | 1978.9435 | 1978.9425 | 0.53    | 1 | 23    | 0.045   | 1    | U | K.KSQDFGNLFSFPSYSQK.S                                  |
| <a href="#">8575</a>  | 1441 - 1456 | 926.4304  | 1850.8462 | 1850.8475 | -0.73   | 0 | 83    | 7.5e-08 | 1    | U | K.SQDFGNLFSFPSYSQK.S                                   |
| <a href="#">8576</a>  | 1441 - 1456 | 617.9560  | 1850.8462 | 1850.8475 | -0.72   | 0 | 20    | 0.044   | 1    | U | K.SQDFGNLFSFPSYSQK.S                                   |
| <a href="#">8577</a>  | 1441 - 1456 | 926.4306  | 1850.8467 | 1850.8475 | -0.42   | 0 | 70    | 5.5e-07 | 1    | U | K.SQDFGNLFSFPSYSQK.S                                   |
| <a href="#">8578</a>  | 1441 - 1456 | 926.4307  | 1850.8468 | 1850.8475 | -0.39   | 0 | 63    | 3.5e-06 | 1    | U | K.SQDFGNLFSFPSYSQK.S                                   |
| <a href="#">8579</a>  | 1441 - 1456 | 926.4307  | 1850.8469 | 1850.8475 | -0.33   | 0 | 57    | 4.2e-06 | 1    | U | K.SQDFGNLFSFPSYSQK.S                                   |
| <a href="#">8581</a>  | 1441 - 1456 | 617.9564  | 1850.8475 | 1850.8475 | -0.0065 | 0 | 27    | 0.012   | 1    | U | K.SQDFGNLFSFPSYSQK.S                                   |
| <a href="#">8582</a>  | 1441 - 1456 | 926.4311  | 1850.8476 | 1850.8475 | 0.040   | 0 | 48    | 3.3e-05 | 1    | U | K.SQDFGNLFSFPSYSQK.S                                   |
| <a href="#">8583</a>  | 1441 - 1456 | 926.4312  | 1850.8479 | 1850.8475 | 0.19    | 0 | 75    | 1.5e-07 | 1    | U | K.SQDFGNLFSFPSYSQK.S                                   |
| <a href="#">8584</a>  | 1441 - 1456 | 926.4312  | 1850.8479 | 1850.8475 | 0.19    | 0 | 74    | 1.1e-07 | 1    | U | K.SQDFGNLFSFPSYSQK.S                                   |
| <a href="#">8585</a>  | 1441 - 1456 | 926.4314  | 1850.8482 | 1850.8475 | 0.36    | 0 | 92    | 5.5e-09 | 1    | U | K.SQDFGNLFSFPSYSQK.S                                   |
| <a href="#">8586</a>  | 1441 - 1456 | 926.4314  | 1850.8482 | 1850.8475 | 0.39    | 0 | 74    | 2e-07   | 1    | U | K.SQDFGNLFSFPSYSQK.S                                   |
| <a href="#">8587</a>  | 1441 - 1456 | 926.4314  | 1850.8483 | 1850.8475 | 0.41    | 0 | 49    | 4.1e-05 | 1    | U | K.SQDFGNLFSFPSYSQK.S                                   |
| <a href="#">8588</a>  | 1441 - 1456 | 617.9567  | 1850.8483 | 1850.8475 | 0.43    | 0 | 53    | 7.4e-05 | 1    | U | K.SQDFGNLFSFPSYSQK.S                                   |
| <a href="#">8589</a>  | 1441 - 1456 | 926.4316  | 1850.8486 | 1850.8475 | 0.60    | 0 | 74    | 1.1e-07 | 1    | U | K.SQDFGNLFSFPSYSQK.S                                   |
| <a href="#">8590</a>  | 1441 - 1456 | 926.4317  | 1850.8489 | 1850.8475 | 0.74    | 0 | 74    | 1.2e-07 | 1    | U | K.SQDFGNLFSFPSYSQK.S                                   |
| <a href="#">8592</a>  | 1441 - 1456 | 926.4325  | 1850.8504 | 1850.8475 | 1.55    | 0 | 20    | 0.015   | 1    | U | K.SQDFGNLFSFPSYSQK.S                                   |
| <a href="#">8593</a>  | 1441 - 1456 | 926.4330  | 1850.8514 | 1850.8475 | 2.11    | 0 | 27    | 0.0028  | 1    | U | K.SQDFGNLFSFPSYSQK.S                                   |
| <a href="#">11450</a> | 1457 - 1482 | 932.4085  | 2794.2036 | 2794.2093 | -2.06   | 1 | 68    | 1.5e-06 | 1    | U | K.SEDDSAKFDSNEEDSASVSPSFGLK.Q                          |
| <a href="#">11452</a> | 1457 - 1482 | 932.4098  | 2794.2076 | 2794.2093 | -0.63   | 1 | 53    | 9.8e-05 | 1    | U | K.SEDDSAKFDSNEEDSASVSPSFGLK.Q                          |
| <a href="#">11453</a> | 1457 - 1482 | 932.4101  | 2794.2084 | 2794.2093 | -0.34   | 1 | 56    | 3.1e-05 | 1    | U | K.SEDDSAKFDSNEEDSASVSPSFGLK.Q                          |
| <a href="#">11455</a> | 1457 - 1482 | 932.4104  | 2794.2094 | 2794.2093 | 0.024   | 1 | 49    | 0.00037 | 1    | U | K.SEDDSAKFDSNEEDSASVSPSFGLK.Q                          |
| <a href="#">11457</a> | 1457 - 1482 | 932.4107  | 2794.2102 | 2794.2093 | 0.31    | 1 | 45    | 0.00034 | 1    | U | K.SEDDSAKFDSNEEDSASVSPSFGLK.Q                          |
| <a href="#">11458</a> | 1457 - 1482 | 932.4107  | 2794.2102 | 2794.2093 | 0.31    | 1 | 73    | 1.1e-06 | 1    | U | K.SEDDSAKFDSNEEDSASVSPSFGLK.Q                          |
| <a href="#">11459</a> | 1457 - 1482 | 699.5598  | 2794.2102 | 2794.2093 | 0.32    | 1 | 39    | 0.0062  | 1    | U | K.SEDDSAKFDSNEEDSASVSPSFGLK.Q                          |
| <a href="#">11461</a> | 1457 - 1482 | 932.4108  | 2794.2106 | 2794.2093 | 0.44    | 1 | 38    | 0.0014  | 1    | U | K.SEDDSAKFDSNEEDSASVSPSFGLK.Q                          |
| <a href="#">11462</a> | 1457 - 1482 | 932.4108  | 2794.2107 | 2794.2093 | 0.50    | 1 | 65    | 5.9e-06 | 1    | U | K.SEDDSAKFDSNEEDSASVSPSFGLK.Q                          |
| <a href="#">11463</a> | 1457 - 1482 | 932.4111  | 2794.2115 | 2794.2093 | 0.76    | 1 | 21    | 0.042   | 1    | U | K.SEDDSAKFDSNEEDSASVSPSFGLK.Q                          |
| <a href="#">11464</a> | 1457 - 1482 | 932.4114  | 2794.2124 | 2794.2093 | 1.09    | 1 | 35    | 0.0045  | 1    | U | K.SEDDSAKFDSNEEDSASVSPSFGLK.Q                          |
| <a href="#">11651</a> | 1457 - 1482 | 959.0660  | 2874.1761 | 2874.1757 | 0.17    | 1 | 42    | 0.00074 | 1    | U | K.SEDDSAKFDSNEEDSASVSPSFGLK.Q<br>+ Phospho (ST)        |
| <a href="#">9547</a>  | 1464 - 1482 | 1031.9639 | 2061.9132 | 2061.9167 | -1.70   | 0 | 66    | 1.5e-06 | 1    | U | K.FDSNEEDSASVSPSFGLK.Q                                 |
| <a href="#">9548</a>  | 1464 - 1482 | 1031.9641 | 2061.9136 | 2061.9167 | -1.53   | 0 | 28    | 0.011   | 1    | U | K.FDSNEEDSASVSPSFGLK.Q                                 |
| <a href="#">9549</a>  | 1464 - 1482 | 1031.9642 | 2061.9139 | 2061.9167 | -1.36   | 0 | 101   | 1.7e-09 | 1    | U | K.FDSNEEDSASVSPSFGLK.Q                                 |
| <a href="#">9550</a>  | 1464 - 1482 | 1031.9647 | 2061.9148 | 2061.9167 | -0.94   | 0 | 134   | 6.6e-13 | 1    | U | K.FDSNEEDSASVSPSFGLK.Q                                 |
| <a href="#">9551</a>  | 1464 - 1482 | 688.3123  | 2061.9150 | 2061.9167 | -0.85   | 0 | 27    | 0.016   | 1    | U | K.FDSNEEDSASVSPSFGLK.Q                                 |
| <a href="#">9552</a>  | 1464 - 1482 | 1031.9648 | 2061.9150 | 2061.9167 | -0.83   | 0 | 109   | 2.7e-10 | 1    | U | K.FDSNEEDSASVSPSFGLK.Q                                 |
| <a href="#">9553</a>  | 1464 - 1482 | 1031.9649 | 2061.9152 | 2061.9167 | -0.75   | 0 | 122   | 9.3e-12 | 1    | U | K.FDSNEEDSASVSPSFGLK.Q                                 |
| <a href="#">9554</a>  | 1464 - 1482 | 1031.9651 | 2061.9156 | 2061.9167 | -0.56   | 0 | 53    | 0.00018 | 1    | U | K.FDSNEEDSASVSPSFGLK.Q                                 |
| <a href="#">9555</a>  | 1464 - 1482 | 1031.9652 | 2061.9158 | 2061.9167 | -0.46   | 0 | 31    | 0.0036  | 1    | U | K.FDSNEEDSASVSPSFGLK.Q                                 |
| <a href="#">9556</a>  | 1464 - 1482 | 1031.9652 | 2061.9158 | 2061.9167 | -0.43   | 0 | 101   | 5e-09   | 1    | U | K.FDSNEEDSASVSPSFGLK.Q                                 |
| <a href="#">9557</a>  | 1464 - 1482 | 688.3126  | 2061.9160 | 2061.9167 | -0.37   | 0 | 22    | 0.024   | 1    | U | K.FDSNEEDSASVSPSFGLK.Q                                 |
| <a href="#">9558</a>  | 1464 - 1482 | 1031.9654 | 2061.9162 | 2061.9167 | -0.24   | 0 | 31    | 0.019   | 1    | U | K.FDSNEEDSASVSPSFGLK.Q                                 |
| <a href="#">9559</a>  | 1464 - 1482 | 1031.9655 | 2061.9165 | 2061.9167 | -0.12   | 0 | 63    | 1.6e-05 | 1    | U | K.FDSNEEDSASVSPSFGLK.Q                                 |
| <a href="#">9560</a>  | 1464 - 1482 | 1031.9657 | 2061.9169 | 2061.9167 | 0.075   | 0 | 76    | 4.8e-07 | 1    | U | K.FDSNEEDSASVSPSFGLK.Q                                 |
| <a href="#">9561</a>  | 1464 - 1482 | 1031.9658 | 2061.9170 | 2061.9167 | 0.12    | 0 | 115   | 6.1e-11 | 1    | U | K.FDSNEEDSASVSPSFGLK.Q                                 |
| <a href="#">9562</a>  | 1464 - 1482 | 688.3130  | 2061.9172 | 2061.9167 | 0.24    | 0 | 49    | 0.00013 | 1    | U | K.FDSNEEDSASVSPSFGLK.Q                                 |
| <a href="#">9564</a>  | 1464 - 1482 | 1031.9659 | 2061.9173 | 2061.9167 | 0.27    | 0 | 47    | 0.00022 | 1    | U | K.FDSNEEDSASVSPSFGLK.Q                                 |
| <a href="#">9566</a>  | 1464 - 1482 | 1031.9660 | 2061.9175 | 2061.9167 | 0.39    | 0 | 101   | 9.7e-10 | 1    | U | K.FDSNEEDSASVSPSFGLK.Q                                 |
| <a href="#">9567</a>  | 1464 - 1482 | 1031.9662 | 2061.9177 | 2061.9167 | 0.49    | 0 | 45    | 0.0001  | 1    | U | K.FDSNEEDSASVSPSFGLK.Q                                 |
| <a href="#">9568</a>  | 1464 - 1482 | 1031.9665 | 2061.9185 | 2061.9167 | 0.84    | 0 | 53    | 9.8e-05 | 1    | U | K.FDSNEEDSASVSPSFGLK.Q                                 |
| <a href="#">9570</a>  | 1464 - 1482 | 1031.9670 | 2061.9195 | 2061.9167 | 1.33    | 0 | 25    | 0.044   | 1    | U | K.FDSNEEDSASVSPSFGLK.Q                                 |
| <a href="#">9571</a>  | 1464 - 1482 | 1031.9677 | 2061.9209 | 2061.9167 | 2.01    | 0 | 40    | 0.00035 | 1    | U | K.FDSNEEDSASVSPSFGLK.Q                                 |
| <a href="#">9572</a>  | 1464 - 1482 | 1031.9680 | 2061.9215 | 2061.9167 | 2.33    | 0 | 38    | 0.00098 | 1    | U | K.FDSNEEDSASVSPSFGLK.Q                                 |
| <a href="#">9573</a>  | 1464 - 1482 | 1031.9684 | 2061.9221 | 2061.9167 | 2.63    | 0 | 33    | 0.0012  | 1    | U | K.FDSNEEDSASVSPSFGLK.Q                                 |
| <a href="#">9836</a>  | 1464 - 1482 | 1071.9477 | 2141.8809 | 2141.8831 | -1.00   | 0 | 51    | 0.00019 | 1    | U | K.FDSNEEDSASVSPSFGLK.Q<br>+ Phospho (ST)               |
| <a href="#">9837</a>  | 1464 - 1482 | 1071.9478 | 2141.8809 | 2141.8831 | -0.98   | 0 | 71    | 4e-07   | 1    | U | K.FDSNEEDSASVSPSFGLK.Q                                 |

| Query                 | Start - End | Observed  | Mr (expt) | Mr (calc) | ppm     | M | Score | Expect  | Rank | U | Peptide                                   |
|-----------------------|-------------|-----------|-----------|-----------|---------|---|-------|---------|------|---|-------------------------------------------|
| <a href="#">9838</a>  | 1464 - 1482 | 1071.9482 | 2141.8819 | 2141.8831 | -0.56   | 0 | 51    | 9.1e-05 | 1    | U | K.FDSNEEDSASVFSPSFGLK.Q<br>+ Phospho (ST) |
| <a href="#">4493</a>  | 1496 - 1508 | 684.8952  | 1367.7759 | 1367.7773 | -1.01   | 1 | 55    | 2e-05   | 1    | U | K.KGKPSDTPVKPK.R                          |
| <a href="#">4494</a>  | 1496 - 1508 | 456.9331  | 1367.7776 | 1367.7773 | 0.25    | 1 | 54    | 4e-05   | 1    | U | K.KGKPSDTPVKPK.R                          |
| <a href="#">5075</a>  | 1496 - 1508 | 483.5890  | 1447.7450 | 1447.7436 | 1.00    | 1 | 32    | 0.045   | 1    | U | K.KGKPSDTPVKPK.R<br>+ Phospho (ST)        |
| <a href="#">3493</a>  | 1497 - 1508 | 414.2343  | 1239.6810 | 1239.6823 | -1.08   | 0 | 26    | 0.024   | 1    | U | K.GKPSDTPVKPK.R                           |
| <a href="#">3496</a>  | 1497 - 1508 | 414.2346  | 1239.6819 | 1239.6823 | -0.36   | 0 | 15    | 0.045   | 1    | U | K.GKPSDTPVKPK.R                           |
| <a href="#">3498</a>  | 1497 - 1508 | 414.2346  | 1239.6820 | 1239.6823 | -0.21   | 0 | 22    | 0.025   | 1    | U | K.GKPSDTPVKPK.R                           |
| <a href="#">3499</a>  | 1497 - 1508 | 414.2346  | 1239.6821 | 1239.6823 | -0.14   | 0 | 47    | 0.00019 | 1    | U | K.GKPSDTPVKPK.R                           |
| <a href="#">3501</a>  | 1497 - 1508 | 620.8488  | 1239.6829 | 1239.6823 | 0.53    | 0 | 38    | 0.0024  | 1    | U | K.GKPSDTPVKPK.R                           |
| <a href="#">3502</a>  | 1497 - 1508 | 414.2350  | 1239.6830 | 1239.6823 | 0.58    | 0 | 30    | 0.0023  | 1    | U | K.GKPSDTPVKPK.R                           |
| <a href="#">9023</a>  | 1515 - 1532 | 640.9896  | 1919.9471 | 1919.9476 | -0.28   | 1 | 59    | 4.6e-05 | 1    | U | K.KVVEAVNSDSDSEFGIPK.K                    |
| <a href="#">9025</a>  | 1515 - 1532 | 960.9810  | 1919.9475 | 1919.9476 | -0.085  | 1 | 83    | 1.9e-08 | 1    | U | K.KVVEAVNSDSDSEFGIPK.K                    |
| <a href="#">9344</a>  | 1515 - 1532 | 1000.9642 | 1999.9139 | 1999.9140 | -0.014  | 1 | 67    | 3e-06   | 1    | U | K.KVVEAVNSDSDSEFGIPK.K<br>+ Phospho (ST)  |
| <a href="#">9345</a>  | 1515 - 1532 | 667.6453  | 1999.9141 | 1999.9140 | 0.073   | 1 | 30    | 0.01    | 1    | U | K.KVVEAVNSDSDSEFGIPK.K<br>+ Phospho (ST)  |
| <a href="#">9346</a>  | 1515 - 1532 | 667.6455  | 1999.9148 | 1999.9140 | 0.40    | 1 | 24    | 0.039   | 1    | U | K.KVVEAVNSDSDSEFGIPK.K<br>+ Phospho (ST)  |
| <a href="#">9347</a>  | 1515 - 1532 | 1000.9647 | 1999.9148 | 1999.9140 | 0.41    | 1 | 48    | 0.00019 | 1    | U | K.KVVEAVNSDSDSEFGIPK.K<br>+ Phospho (ST)  |
| <a href="#">9348</a>  | 1515 - 1532 | 667.6457  | 1999.9153 | 1999.9140 | 0.67    | 1 | 24    | 0.039   | 1    | U | K.KVVEAVNSDSDSEFGIPK.K<br>+ Phospho (ST)  |
| <a href="#">9349</a>  | 1515 - 1532 | 667.6458  | 1999.9157 | 1999.9140 | 0.85    | 1 | 21    | 0.048   | 1    | U | K.KVVEAVNSDSDSEFGIPK.K<br>+ Phospho (ST)  |
| <a href="#">9350</a>  | 1515 - 1532 | 1000.9654 | 1999.9162 | 1999.9140 | 1.15    | 1 | 55    | 2.4e-05 | 1    | U | K.KVVEAVNSDSDSEFGIPK.K<br>+ Phospho (ST)  |
| <a href="#">8113</a>  | 1516 - 1532 | 896.9322  | 1791.8498 | 1791.8527 | -1.61   | 0 | 47    | 8e-05   | 1    | U | K.VVEAVNSDSDSEFGIPK.K                     |
| <a href="#">8114</a>  | 1516 - 1532 | 896.9333  | 1791.8521 | 1791.8527 | -0.33   | 0 | 63    | 2.1e-06 | 1    | U | K.VVEAVNSDSDSEFGIPK.K                     |
| <a href="#">8115</a>  | 1516 - 1532 | 896.9335  | 1791.8524 | 1791.8527 | -0.15   | 0 | 67    | 7.7e-07 | 1    | U | K.VVEAVNSDSDSEFGIPK.K                     |
| <a href="#">8699</a>  | 1516 - 1532 | 936.9169  | 1871.8192 | 1871.8190 | 0.11    | 0 | 42    | 0.00014 | 1    | U | K.VVEAVNSDSDSEFGIPK.K<br>+ Phospho (ST)   |
| <a href="#">8700</a>  | 1516 - 1532 | 936.9170  | 1871.8195 | 1871.8190 | 0.28    | 0 | 71    | 2.6e-07 | 1    | U | K.VVEAVNSDSDSEFGIPK.K<br>+ Phospho (ST)   |
| <a href="#">9024</a>  | 1516 - 1533 | 640.9897  | 1919.9473 | 1919.9476 | -0.19   | 1 | 28    | 0.021   | 1    | U | K.VVEAVNSDSDSEFGIPK.K.T                   |
| <a href="#">8336</a>  | 1547 - 1562 | 606.2589  | 1815.7549 | 1815.7537 | 0.66    | 2 | 53    | 0.0002  | 1    | U | K.RKASGSENEGDPNPKR.K<br>+ Phospho (ST)    |
| <a href="#">9138</a>  | 1547 - 1563 | 648.9568  | 1943.8485 | 1943.8486 | -0.062  | 3 | 29    | 0.01    | 1    | U | K.RKASGSENEGDPNPKR.T<br>+ Phospho (ST)    |
| <a href="#">6455</a>  | 1548 - 1562 | 790.8502  | 1579.6858 | 1579.6862 | -0.25   | 1 | 30    | 0.0031  | 1    | U | R.KASGSENEGDPNPKR.K                       |
| <a href="#">7019</a>  | 1548 - 1562 | 830.8336  | 1659.6526 | 1659.6526 | -0.0030 | 1 | 42    | 0.00061 | 1    | U | R.KASGSENEGDPNPKR.K<br>+ Phospho (ST)     |
| <a href="#">7022</a>  | 1548 - 1562 | 554.2251  | 1659.6535 | 1659.6526 | 0.54    | 1 | 25    | 0.024   | 1    | U | R.KASGSENEGDPNPKR.K<br>+ Phospho (ST)     |
| <a href="#">7024</a>  | 1548 - 1562 | 830.8350  | 1659.6554 | 1659.6526 | 1.70    | 1 | 44    | 0.00075 | 1    | U | R.KASGSENEGDPNPKR.K<br>+ Phospho (ST)     |
| <a href="#">7702</a>  | 1548 - 1562 | 870.8171  | 1739.6197 | 1739.6189 | 0.47    | 1 | 29    | 0.0089  | 1    | U | R.KASGSENEGDPNPKR.K<br>+ 2 Phospho (ST)   |
| <a href="#">7432</a>  | 1548 - 1563 | 570.2674  | 1707.7805 | 1707.7812 | -0.40   | 2 | 46    | 0.00059 | 1    | U | R.KASGSENEGDPNPKR.K.T                     |
| <a href="#">7433</a>  | 1548 - 1563 | 570.2676  | 1707.7811 | 1707.7812 | -0.066  | 2 | 53    | 9.6e-05 | 1    | U | R.KASGSENEGDPNPKR.T                       |
| <a href="#">7434</a>  | 1548 - 1563 | 854.8983  | 1707.7821 | 1707.7812 | 0.51    | 2 | 52    | 8.6e-05 | 1    | U | R.KASGSENEGDPNPKR.T                       |
| <a href="#">7435</a>  | 1548 - 1563 | 570.2681  | 1707.7825 | 1707.7812 | 0.78    | 2 | 27    | 0.049   | 1    | U | R.KASGSENEGDPNPKR.T                       |
| <a href="#">8045</a>  | 1548 - 1563 | 596.9235  | 1787.7487 | 1787.7475 | 0.66    | 2 | 44    | 0.0003  | 1    | U | R.KASGSENEGDPNPKR.K<br>+ Phospho (ST)     |
| <a href="#">5099</a>  | 1549 - 1562 | 726.8024  | 1451.5902 | 1451.5913 | -0.73   | 0 | 32    | 0.0043  | 1    | U | K.ASGSENEGDPNPKR.K                        |
| <a href="#">5100</a>  | 1549 - 1562 | 726.8028  | 1451.5910 | 1451.5913 | -0.18   | 0 | 47    | 0.00032 | 1    | U | K.ASGSENEGDPNPKR.K                        |
| <a href="#">5101</a>  | 1549 - 1562 | 726.8028  | 1451.5911 | 1451.5913 | -0.13   | 0 | 31    | 0.01    | 1    | U | K.ASGSENEGDPNPKR.K                        |
| <a href="#">5102</a>  | 1549 - 1562 | 484.8712  | 1451.5919 | 1451.5913 | 0.41    | 0 | 41    | 0.0016  | 1    | U | K.ASGSENEGDPNPKR.K                        |
| <a href="#">5991</a>  | 1549 - 1562 | 766.7861  | 1531.5576 | 1531.5576 | -0.032  | 0 | 31    | 0.008   | 1    | U | K.ASGSENEGDPNPKR.K<br>+ Phospho (ST)      |
| <a href="#">5992</a>  | 1549 - 1562 | 766.7863  | 1531.5580 | 1531.5576 | 0.26    | 0 | 48    | 0.00022 | 1    | U | K.ASGSENEGDPNPKR.K<br>+ Phospho (ST)      |
| <a href="#">5993</a>  | 1549 - 1562 | 766.7865  | 1531.5585 | 1531.5576 | 0.58    | 0 | 53    | 0.00012 | 1    | U | K.ASGSENEGDPNPKR.K<br>+ Phospho (ST)      |
| <a href="#">6453</a>  | 1549 - 1563 | 790.8501  | 1579.6856 | 1579.6862 | -0.41   | 1 | 62    | 2.5e-05 | 1    | U | K.ASGSENEGDPNPKR.K.T                      |
| <a href="#">6454</a>  | 1549 - 1563 | 527.5692  | 1579.6858 | 1579.6862 | -0.30   | 1 | 32    | 0.026   | 1    | U | K.ASGSENEGDPNPKR.T                        |
| <a href="#">7021</a>  | 1549 - 1563 | 830.8338  | 1659.6530 | 1659.6526 | 0.27    | 1 | 62    | 3.6e-05 | 1    | U | K.ASGSENEGDPNPKR.K<br>+ Phospho (ST)      |
| <a href="#">7023</a>  | 1549 - 1563 | 554.2252  | 1659.6536 | 1659.6526 | 0.63    | 1 | 40    | 0.00062 | 1    | U | K.ASGSENEGDPNPKR.K<br>+ Phospho (ST)      |
| <a href="#">11780</a> | 1574 - 1599 | 979.7948  | 2936.3625 | 2936.3716 | -3.12   | 1 | 36    | 0.0042  | 1    | U | K.KTSFDQSDVDIFPSDFPTEPPSLPR.T             |
| <a href="#">11784</a> | 1574 - 1599 | 979.7963  | 2936.3672 | 2936.3716 | -1.51   | 1 | 32    | 0.021   | 1    | U | K.KTSFDQSDVDIFPSDFPTEPPSLPR.T             |
| <a href="#">11786</a> | 1574 - 1599 | 979.7969  | 2936.3689 | 2936.3716 | -0.94   | 1 | 32    | 0.0035  | 1    | U | K.KTSFDQSDVDIFPSDFPTEPPSLPR.T             |
| <a href="#">11787</a> | 1574 - 1599 | 979.7970  | 2936.3692 | 2936.3716 | -0.83   | 1 | 54    | 0.0001  | 1    | U | K.KTSFDQSDVDIFPSDFPTEPPSLPR.T             |
| <a href="#">11788</a> | 1574 - 1599 | 979.7971  | 2936.3695 | 2936.3716 | -0.73   | 1 | 27    | 0.018   | 1    | U | K.KTSFDQSDVDIFPSDFPTEPPSLPR.T             |
| <a href="#">11790</a> | 1574 - 1599 | 979.7974  | 2936.3703 | 2936.3716 | -0.47   | 1 | 40    | 0.0045  | 1    | U | K.KTSFDQSDVDIFPSDFPTEPPSLPR.T             |
| <a href="#">11791</a> | 1574 - 1599 | 588.2814  | 2936.3705 | 2936.3716 | -0.39   | 1 | 29    | 0.014   | 1    | U | K.KTSFDQSDVDIFPSDFPTEPPSLPR.T             |
| <a href="#">11794</a> | 1574 - 1599 | 979.7978  | 2936.3714 | 2936.3716 | -0.070  | 1 | 26    | 0.046   | 1    | U | K.KTSFDQSDVDIFPSDFPTEPPSLPR.T             |
| <a href="#">11795</a> | 1574 - 1599 | 735.1002  | 2936.3715 | 2936.3716 | -0.045  | 1 | 45    | 0.0014  | 1    | U | K.KTSFDQSDVDIFPSDFPTEPPSLPR.T             |
| <a href="#">11796</a> | 1574 - 1599 | 979.7978  | 2936.3717 | 2936.3716 | 0.032   | 1 | 49    | 0.0006  | 1    | U | K.KTSFDQSDVDIFPSDFPTEPPSLPR.T             |
| <a href="#">11797</a> | 1574 - 1599 | 979.7979  | 2936.3720 | 2936.3716 | 0.11    | 1 | 61    | 1.7e-05 | 1    | U | K.KTSFDQSDVDIFPSDFPTEPPSLPR.T             |
| <a href="#">11498</a> | 1575 - 1599 | 937.0990  | 2808.2752 | 2808.2767 | -0.52   | 0 | 21    | 0.041   | 1    | U | K.TSFDQSDVDIFPSDFPTEPPSLPR.T              |
| <a href="#">11499</a> | 1575 - 1599 | 937.0992  | 2808.2756 | 2808.2767 | -0.37   | 0 | 28    | 0.022   | 1    | U | K.TSFDQSDVDIFPSDFPTEPPSLPR.T              |
| <a href="#">11503</a> | 1575 - 1599 | 937.1001  | 2808.2785 | 2808.2767 | 0.66    | 0 | 27    | 0.012   | 1    | U | K.TSFDQSDVDIFPSDFPTEPPSLPR.T              |
| <a href="#">11504</a> | 1575 - 1599 | 937.1002  | 2808.2789 | 2808.2767 | 0.79    | 0 | 27    | 0.019   | 1    | U | K.TSFDQSDVDIFPSDFPTEPPSLPR.T              |
| <a href="#">9925</a>  | 1609 - 1626 | 1086.9135 | 2171.8124 | 2171.8154 | -1.36   | 0 | 29    | 0.0044  | 1    | U | K.YFAESDEEEDVDVFAMFN.-                    |
| <a href="#">9933</a>  | 1609 - 1626 | 1086.9148 | 2171.8151 | 2171.8154 | -0.12   | 0 | 33    | 0.00077 | 1    | U | K.YFAESDEEEDVDVFAMFN.-                    |
| <a href="#">9935</a>  | 1609 - 1626 | 724.9461  | 2171.8164 | 2171.8154 | 0.46    | 0 | 41    | 0.00015 | 1    | U | K.YFAESDEEEDVDVFAMFN.-                    |
| <a href="#">9975</a>  | 1609 - 1626 | 1094.9108 | 2187.8071 | 2187.8103 | -1.45   | 0 | 79    | 6.2e-08 | 1    | U | K.YFAESDEEEDVDVFAMFN.-<br>+ Oxidation (M) |
| <a href="#">9976</a>  | 1609 - 1626 | 1094.9118 | 2187.8091 | 2187.8103 | -0.54   | 0 | 53    | 1.7e-05 | 1    | U | K.YFAESDEEEDVDVFAMFN.-<br>+ Oxidation (M) |
| <a href="#">9977</a>  | 1609 - 1626 | 1094.9121 | 2187.8096 | 2187.8103 | -0.32   | 0 | 40    | 0.00039 | 1    | U | K.YFAESDEEEDVDVFAMFN.-                    |



| Query                | Start - End | Observed  | Mr(expt)  | Mr(calc)  | ppm  | M | Score | Expect  | Rank     | U | Peptide                                  |
|----------------------|-------------|-----------|-----------|-----------|------|---|-------|---------|----------|---|------------------------------------------|
| <a href="#">9979</a> | 1609 - 1626 | 1094.9126 | 2187.8107 | 2187.8103 | 0.18 | 0 | 65    | 8.4e-07 | <u>1</u> | U | K.YFAESDEEEDDVFAMFN.-<br>+ Oxidation (M) |
| <a href="#">9981</a> | 1609 - 1626 | 1094.9132 | 2187.8119 | 2187.8103 | 0.76 | 0 | 17    | 0.028   | <u>1</u> | U | K.YFAESDEEEDDVFAMFN.-<br>+ Oxidation (M) |

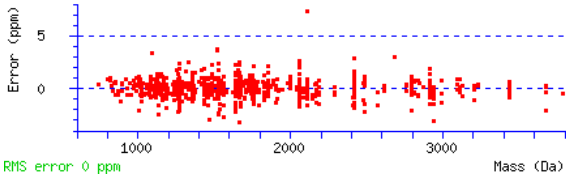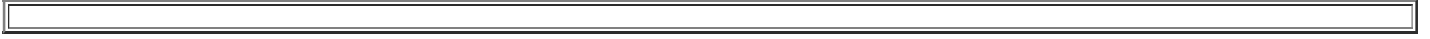

Supplement: 41467_2023_44089_MOESM5_ESM.pdf [file 41467_2023_44089_MOESM5_ESM.pdf]
