# Supplementary material for: ERK2-topoisomerase II regulatory axis is important for gene activation in immediate early genes
Source: Springer Nature journal article supplement (doi:10.1038/s41467-023-44089-y), 2023-12-14

# MASCOT Search Results

## Protein View: Q02880

DNA topoisomerase 2-beta OS=Homo sapiens OX=9606 GN=TOP2B PE=1 SV=3

Database: Uniprot\_Proteome\_Human  
Score: 19255  
Monoisotopic mass (M<sub>r</sub>): 184122  
Calculated pI: 8.14

Sequence similarity is available as [an NCBI BLAST search of Q02880 against nr.](#)

### Search parameters

MS data file: File Name: Z:\SN22\SN221364\_deTOP2B\_Erk2\_lul.raw; File Path: ; File Time: 3/1/2023 12:45:59 PM; File Size: 347857146 [Byte]  
Enzyme: Trypsin: cuts C-term side of KR unless next residue is P.  
Fixed modifications: **Carbamidomethyl (C)**  
Variable modifications: **Acetyl (Protein N-term), Oxidation (M), Phospho (ST), Phospho (Y)**

### Protein sequence coverage: 62%

Matched peptides shown in **bold red**.

```
1 MAKSGGCGAG AGVGGGNGAL TWVTLFDQNN AAKKEESETA NKNDSSKKLS
51 VERVYQKKTQ LEHILLRPDT YIGSVEPLTQ FMWVYDEDVG MNCREVTFVFP
101 GLYKIFDEIL VNAADNKQRD KNMTCIKVSI DPESNIISIW NNGKGIPVVE
151 HKVEKVVYVPA LIFGQLLTSS NYDDDEKKVT GGRNGYGAKL CNIFSTKFTV
201 ETACKEYKHS FKQTWMNNM KTSEAKIKHF DGEDYTCITF QPDLSKFKME
251 KLDKDIVALM TRRAYDLAS CRGVKVMFNG KKLPVNGFRS YVDLYVKDKL
301 DETGVALKVI HELANERWDV CLTLSEKGFQ QISFVNSIAT TKGGRHVDYV
351 VDQVVGLKIE VVKKKNKAGV SVKPFQVKNH IWVFNCLIE NPTFDSQTKE
401 NMTLQPKSFG SKCQLSEKFF KAASNCGIVE SILNWVKFKA QTQLNKKCSS
451 VKYSKIKGIP KLDDANDAGG KHSLECTLIL TEGDSAKSLA VSGLGVIGRD
501 RYGVFPLRKG ILNVREASHK QIMENAEINN IIKIVGLQYK KSYYDAESLK
551 TLRYGKIMIM TDQDQDQSHI KGLLINFIIH NWPSLLKHGF LEEFITPIVK
601 ASKNKQELSF YSIPEFDEWK KHIENQKAWK IKYYKGLGTS TAKEAKEYFA
651 DMERHRILFR YAGEPDDAAI TLAFSKKKID DRKEWLTNFM EDRRQRRLHG
701 LPEQFLYGTA TKHLTYNDFI NKELILFSNS DNERSIPSLV DGFKPGQRKV
751 LFTCFKRNDK REVKVAQLAG SVAEMSAYHH GEQALMMTIV NLAQNFEVGSN
801 NINLLQPIGQ FGTRLHGKGD AASPRYIFTM LSTLARLLFP AVDDNLLKFL
851 YDDNQRVEPE WYIPIIPMVL INGAEGIGTG WACKLPNYDA REIVNNVRRM
901 LDGLDPHML PNYKNFKGTI QELGQNYAV SGEIFVVDRN TVEITELPVR
951 TWTQVYKEQV LEPMLNGTDK TPALISDYKE YHTDTTVKFV VKMTEEKLAQ
1001 AEAAGLHKVF KLQTTLTCSN MVLFDMHGCL KKYETVQDIL KEFFDLRLSY
1051 YGLRKEWLVG MLGAESTKLN NQARFILEKI QGKITIENRS KKDLIQMLVQ
1101 RGYESDPVKA WKEAQEKAAE EDETQNQHDD SSSDSGTSPG PDFNYILNMS
1151 LWSLTKEKVE ELIKQRDAKG REVNDLKRKS PSDLWKEDLA AFVEELDQVE
1201 SQEREDVLAG MSGKAIKGKV GKPKVKLQQL EETMPSPYGR RIIPEITAMK
1251 ADASKKLLKK KKGDLDTAAV KVEFDEEFSG APVEGAGEEA LTPSVPINKG
1301 PKPKREKKEP GTRVRKTPTS SGKPSAKVKV KRNPSWDES KESDLEETE
1351 PVVIPRDSLL RRAAAERPKY TDFSEEEEDD DADDDDDNN DLEELVKAS
1401 PITNDGEDEF VPSDGLDKDE YTFSPGSKA TPEKSLHDKK SQDFGNLFSF
1451 PSYSQKSEDD SAKFSNEED SASVFSPSFG LKQTDKVPK TVAACKGKPS
1501 SDTVPKPKRA PKQKVVVEAV NSDSDSEFGI PKKTTTPKGG GRGAKKRRAS
1551 SENEGDIYNP GRKTSKTSK KPKKTSFDQD SDVDIFPSDF PTEPPSLRPT
1601 GRARKEVKYF AESDEEEDDV DFAMFN
```

Unformatted sequence string: **1626 residues** (for pasting into other applications).

Sort by  residue number  increasing mass  decreasing mass  
Show  matched peptides only  predicted peptides also

| Query                | Start - End | Observed | Mr (expt) | Mr (calc) | ppm   | M | Score | Expect  | Rank | U | Peptide            |
|----------------------|-------------|----------|-----------|-----------|-------|---|-------|---------|------|---|--------------------|
| <a href="#">1755</a> | 34 - 42     | 518.2515 | 1034.4884 | 1034.4880 | 0.46  | 1 | 37    | 0.012   | 1    | U | K.KEESETANK.N      |
| <a href="#">6141</a> | 34 - 47     | 522.9126 | 1565.7159 | 1565.7169 | -0.62 | 2 | 24    | 0.02    | 1    | U | K.KEESETANKNDSSK.K |
| <a href="#">6142</a> | 34 - 47     | 783.8665 | 1565.7184 | 1565.7169 | 0.96  | 2 | 55    | 4.1e-05 | 1    | U | K.KEESETANKNDSSK.K |
| <a href="#">6143</a> | 34 - 47     | 783.8665 | 1565.7184 | 1565.7169 | 0.96  | 2 | 54    | 2.6e-05 | 1    | U | K.KEESETANKNDSSK.K |
| <a href="#">7142</a> | 34 - 48     | 565.6111 | 1693.8114 | 1693.8118 | -0.27 | 3 | 25    | 0.017   | 1    | U | K.KEESETANKNDSSK.L |
| <a href="#">7143</a> | 34 - 48     | 565.6115 | 1693.8127 | 1693.8118 | 0.51  | 3 | 34    | 0.0022  | 1    | U | K.KEESETANKNDSSK.L |
| <a href="#">2777</a> | 95 - 104    | 576.8185 | 1151.6225 | 1151.6227 | -0.15 | 0 | 14    | 0.045   | 1    | R | EVTFPVGLYK.I       |
| <a href="#">2779</a> | 95 - 104    | 576.8187 | 1151.6228 | 1151.6227 | 0.11  | 0 | 18    | 0.026   | 1    | R | EVTFPVGLYK.I       |
| <a href="#">2780</a> | 95 - 104    | 576.8188 | 1151.6230 | 1151.6227 | 0.30  | 0 | 19    | 0.026   | 1    | R | EVTFPVGLYK.I       |
| <a href="#">2781</a> | 95 - 104    | 576.8188 | 1151.6230 | 1151.6227 | 0.32  | 0 | 21    | 0.018   | 1    | R | EVTFPVGLYK.I       |
| <a href="#">5070</a> | 105 - 117   | 487.9233 | 1460.7482 | 1460.7511 | -2.00 | 0 | 30    | 0.005   | 1    | K | IFDEILVNAADNK.Q    |
| <a href="#">5071</a> | 105 - 117   | 731.3821 | 1460.7496 | 1460.7511 | -0.98 | 0 | 50    | 0.00025 | 1    | K | IFDEILVNAADNK.Q    |
| <a href="#">5072</a> | 105 - 117   | 487.9240 | 1460.7502 | 1460.7511 | -0.62 | 0 | 46    | 0.00075 | 1    | K | IFDEILVNAADNK.Q    |
| <a href="#">5073</a> | 105 - 117   | 731.3824 | 1460.7502 | 1460.7511 | -0.61 | 0 | 51    | 0.00011 | 1    | K | IFDEILVNAADNK.Q    |
| <a href="#">5075</a> | 105 - 117   | 731.3824 | 1460.7503 | 1460.7511 | -0.56 | 0 | 68    | 3.1e-06 | 1    | K | IFDEILVNAADNK.Q    |



























| Query                                    | Start - End | Observed  | Mr(expt)  | Mr(calc)  | ppm  | M Score | Expect | Rank   | U | Peptide                                    |
|------------------------------------------|-------------|-----------|-----------|-----------|------|---------|--------|--------|---|--------------------------------------------|
| <input checked="" type="checkbox"/> 9741 | 1609 - 1626 | 1094.9130 | 2187.8115 | 2187.8103 | 0.55 | 0       | 27     | 0.0035 | 1 | U K.YFAESDEEEDDVFAMFN.-<br>+ Oxidation (M) |

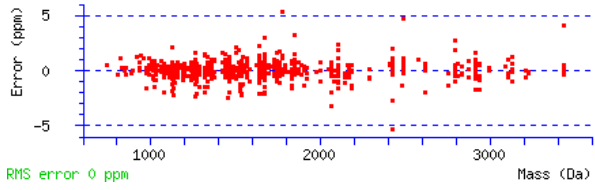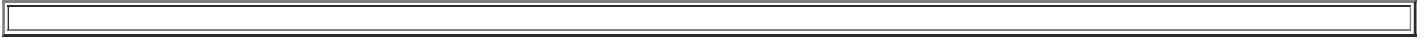

Supplement: 41467_2023_44089_MOESM6_ESM.pdf [file 41467_2023_44089_MOESM6_ESM.pdf]
