# Supplementary material for: ERK2-topoisomerase II regulatory axis is important for gene activation in immediate early genes
Source: Springer Nature journal article supplement (doi:10.1038/s41467-023-44089-y), 2023-12-14

# MASCOT Search Results

## Protein View: Q02880

DNA topoisomerase 2-beta OS=Homo sapiens OX=9606 GN=TOP2B PE=1 SV=3

Database: Uniprot\_Proteome\_Human  
Score: 18698  
Monoisotopic mass (M<sub>r</sub>): 184122  
Calculated pI: 8.14

Sequence similarity is available as [an NCBI BLAST search of Q02880 against nr.](#)

### Search parameters

MS data file: File Name: Z:\SN22\SN221366\_deTOP2B\_Erk2m\_lul.raw; File Path: ; File Time: 3/1/2023 6:25:31 PM; File Size: 352168572 [Byte]  
Enzyme: Trypsin: cuts C-term side of KR unless next residue is P.  
Fixed modifications: **Carbamidomethyl (C)**.  
Variable modifications: **Acetyl (Protein N-term)**, **Oxidation (M)**, **Phospho (ST)**, **Phospho (Y)**.

### Protein sequence coverage: 65%

Matched peptides shown in **bold red**.

```
1  MAKSGGCGAG  AGVGGGNGAL  TWVTLFDQNN  AAKKEESETA  NKNDSSKLS
51  VERVYQKKTQ  LEHILLRPDT  YIGSVEPLTQ  FMWVYDEDVG  MNCREVTFVP
101 GLYKIFDEIL  VNAADNKQRD  KNMTCIKVSI  DPESNIISIW  NNGKGIPVVE
151 HKVEKVVVPA  LIFGQLLTSS  NYDDDEKKVT  GGRNGYGAKL  CNIFSTKFTV
201 ETACKEYKHS  FKQTWMNNMM  KTSEAKIKHF  DGEDYTCITF  QPDLSKFKME
251 KLDKDIVALM  TRRAYDLAGS  CRGVKVMFNG  KKLPVNGFRS  YVDLYVKDKL
301 DTGVALKVI  HELANERWDV  CLTLSEKGFQ  QISFVNSIAT  TKGGRHVDYV
351 VDQVVGKLIE  VVKKKNKAGV  SVKPFQVKNH  IWVFINCLIE  NPTFDSQTKE
401 NMTLQPKSFG  SKCQLSEKFF  KAASNCGIVE  SILNWVKFKA  QTQLNKKCSS
451 VKYSKIKGIP  KLDDANDAGG  KHSLECTLIL  TEGDSAKSLA  VSGLGVIGRD
501 RYGVFPLRGK  ILNVREASHK  QIMENAEINN  IIKIVGLQYK  KSYDDAESLK
551 TLRYGKIMIM  TDQDQDGSHI  KGLLINFIHH  NWPSLLKHGF  LEEFITPIVK
601 ASKNKQELSEF  YSIPEFDEWK  KHIENQKAWK  IKYKGLGTS  TAKEAKEYFA
651 DMERHRILFR  YAGPEDDAAI  TLAFSKKKID  DRKEWLTNFM  EDRRQRLHG
701 LPEQFLYGTA  TKHLYNDFI  NKELILFSNS  DNERSIPSLV  DGFKPGQRKV
751 LFTCFKRNDK  REVKVAQLAG  SVAEMSAYHH  GEQALMMTIV  NLAQNFVGSN
801 NINLLQPIGQ  FGTRLHGKGD  AASPRYIFTM  LSTLARLLFP  AVDDNLLKFL
851 YDDNQRVEPE  WYIPIPMVL  INGAEGIGTG  WACKLPNYDA  REIVNVRRM
901 LDGLDPHMPL  PNYKNFKGTI  QELGQOYAV  SGEIFVVDRN  TVEITELPVR
951 TWTQVYKEQV  LEPMLNGTDK  TPALIS DYKE  YHTDTTVKFV  VKMTEEKLAQ
1001 AEAAGLHKVF  KLQTTLTCNS  MVLFDHMGCL  KKYETVQDIL  KEFFDLRLSY
1051 YGLRKEWLVG  MLGAESTKLN  NQARFILEIK  QKGITIENRS  KKDLIQMLVQ
1101 RGYEDPVKA  WKEAQEKAAE  EDETQQHDD  SSSDSGTPSG  PDFNYILNMS
1151 LWSLTKEKVE  ELIKQRDAKG  REVNDLKRS  PSDLWKEDLA  AFVEELDKVE
1201 SQEREDVLG  MSGKAIGKV  GPKVKKLQL  EETMPSPYGR  RIIPEITAMK
1251 ADASKLLKK  KGDLDTAAV  KVEFDEEFSG  APVEGAGEEA  LPPSVPINKG
1301 PKPKREKKEP  GTRVRKTPTS  SGKPSAKVK  KRNPWSDES  KSESDLEETE
1351 PVVIPRDSL  RRAAERPKY  TFDFSEEDD  DADDDDDDN  DLEELKVKAS
1401 PITNDGEDEF  VPSDGLDKDE  YTFSPGSKA  TPEKSLHDKK  SQDFGNLFSF
1451 PSYSQKSEDD  SAKFSNEED  SASVFSPSFG  LKQTDKVPK  TVAAKKGKPS
1501 SDTVPKPKRA  PKQKVVEAV  NSDSDSEFGI  PKKTTTPK  GRGAKRRKAS
1551 GSENEGDYNP  GRKTSKTSK  KPKKTSFDQD  SDVDIFPSDF  PTEPPSLPRT
1601 GRARKEVKYF  AESDEEEDV  DFAMFN
```

Unformatted sequence string: **1626 residues** (for pasting into other applications).

Sort by  residue number  increasing mass  decreasing mass

Show  matched peptides only  predicted peptides also

| Query                 | Start - End | Observed  | Mr (expt) | Mr (calc) | ppm     | M | Score | Expect  | Rank | U | Peptide                                                     |
|-----------------------|-------------|-----------|-----------|-----------|---------|---|-------|---------|------|---|-------------------------------------------------------------|
| <a href="#">1666</a>  | 34 - 42     | 518.2512  | 1034.4879 | 1034.4880 | -0.10   | 1 | 42    | 0.0039  | 1    | U | K.KEESETANK.N                                               |
| <a href="#">5991</a>  | 34 - 47     | 783.8662  | 1565.7178 | 1565.7169 | 0.58    | 2 | 28    | 0.0083  | 1    | U | K.KEESETANKNDSSK.K                                          |
| <a href="#">5992</a>  | 34 - 47     | 783.8662  | 1565.7178 | 1565.7169 | 0.58    | 2 | 52    | 5.7e-05 | 1    | U | K.KEESETANKNDSSK.K                                          |
| <a href="#">6939</a>  | 34 - 48     | 565.6116  | 1693.8129 | 1693.8118 | 0.65    | 3 | 25    | 0.017   | 1    | U | K.KEESETANKNDSSK.L                                          |
| <a href="#">12986</a> | 59 - 94     | 1086.2690 | 4341.0467 | 4341.0545 | -1.79   | 0 | 41    | 0.019   | 1    | U | K.TQLEHILLRPDTYIGSVEPLTQFMWVYDEVDGMNCR.E<br>+ Oxidation (M) |
| <a href="#">2646</a>  | 95 - 104    | 576.8185  | 1151.6224 | 1151.6227 | -0.19   | 0 | 16    | 0.035   | 1    | R | EVTFVPGLYK.I                                                |
| <a href="#">2647</a>  | 95 - 104    | 576.8186  | 1151.6227 | 1151.6227 | 0.055   | 0 | 16    | 0.035   | 1    | R | EVTFVPGLYK.I                                                |
| <a href="#">2653</a>  | 95 - 104    | 576.8191  | 1151.6236 | 1151.6227 | 0.84    | 0 | 20    | 0.021   | 1    | R | EVTFVPGLYK.I                                                |
| <a href="#">4952</a>  | 105 - 117   | 487.9240  | 1460.7501 | 1460.7511 | -0.64   | 0 | 30    | 0.0069  | 1    | K | IFDEILVNAADNK.Q                                             |
| <a href="#">4953</a>  | 105 - 117   | 487.9240  | 1460.7503 | 1460.7511 | -0.52   | 0 | 36    | 0.0066  | 1    | K | IFDEILVNAADNK.Q                                             |
| <a href="#">4954</a>  | 105 - 117   | 731.3825  | 1460.7505 | 1460.7511 | -0.39   | 0 | 80    | 7.6e-07 | 1    | K | IFDEILVNAADNK.Q                                             |
| <a href="#">4955</a>  | 105 - 117   | 731.3825  | 1460.7505 | 1460.7511 | -0.39   | 0 | 59    | 2.6e-05 | 1    | K | IFDEILVNAADNK.Q                                             |
| <a href="#">4956</a>  | 105 - 117   | 487.9241  | 1460.7506 | 1460.7511 | -0.34   | 0 | 31    | 0.016   | 1    | K | IFDEILVNAADNK.Q                                             |
| <a href="#">4957</a>  | 105 - 117   | 731.3827  | 1460.7509 | 1460.7511 | -0.12   | 0 | 47    | 0.00021 | 1    | K | IFDEILVNAADNK.Q                                             |
| <a href="#">4958</a>  | 105 - 117   | 731.3828  | 1460.7509 | 1460.7511 | -0.092  | 0 | 70    | 2.8e-06 | 1    | K | IFDEILVNAADNK.Q                                             |
| <a href="#">4960</a>  | 105 - 117   | 487.9243  | 1460.7510 | 1460.7511 | -0.049  | 0 | 48    | 0.0014  | 1    | K | IFDEILVNAADNK.Q                                             |
| <a href="#">4962</a>  | 105 - 117   | 487.9243  | 1460.7511 | 1460.7511 | -0.0075 | 0 | 31    | 0.014   | 1    | K | IFDEILVNAADNK.Q                                             |
| <a href="#">4963</a>  | 105 - 117   | 487.9243  | 1460.7511 | 1460.7511 | -0.0075 | 0 | 40    | 0.004   | 1    | K | IFDEILVNAADNK.Q                                             |

| Query                 | Start - End | Observed  | Mr (expt) | Mr (calc) | ppm    | M | Score | Expect  | Rank | U   | Peptide                            |
|-----------------------|-------------|-----------|-----------|-----------|--------|---|-------|---------|------|-----|------------------------------------|
| <a href="#">4964</a>  | 105 - 117   | 487.9243  | 1460.7511 | 1460.7511 | 0.013  | 0 | 27    | 0.02    | 1    | ... | K.IFDEILVNAADNK.Q                  |
| <a href="#">4965</a>  | 105 - 117   | 731.3828  | 1460.7511 | 1460.7511 | 0.031  | 0 | 51    | 0.00013 | 1    | ... | K.IFDEILVNAADNK.Q                  |
| <a href="#">4966</a>  | 105 - 117   | 487.9244  | 1460.7512 | 1460.7511 | 0.095  | 0 | 41    | 0.00091 | 1    | ... | K.IFDEILVNAADNK.Q                  |
| <a href="#">4967</a>  | 105 - 117   | 731.3829  | 1460.7512 | 1460.7511 | 0.099  | 0 | 68    | 9.4e-06 | 1    | ... | K.IFDEILVNAADNK.Q                  |
| <a href="#">4968</a>  | 105 - 117   | 731.3829  | 1460.7512 | 1460.7511 | 0.11   | 0 | 68    | 4.3e-06 | 1    | ... | K.IFDEILVNAADNK.Q                  |
| <a href="#">4969</a>  | 105 - 117   | 487.9244  | 1460.7513 | 1460.7511 | 0.12   | 0 | 30    | 0.049   | 1    | ... | K.IFDEILVNAADNK.Q                  |
| <a href="#">4971</a>  | 105 - 117   | 731.3830  | 1460.7515 | 1460.7511 | 0.28   | 0 | 68    | 3.8e-06 | 1    | ... | K.IFDEILVNAADNK.Q                  |
| <a href="#">4972</a>  | 105 - 117   | 487.9244  | 1460.7515 | 1460.7511 | 0.30   | 0 | 28    | 0.0071  | 1    | ... | K.IFDEILVNAADNK.Q                  |
| <a href="#">4973</a>  | 105 - 117   | 731.3831  | 1460.7516 | 1460.7511 | 0.36   | 0 | 60    | 1.6e-05 | 1    | ... | K.IFDEILVNAADNK.Q                  |
| <a href="#">4974</a>  | 105 - 117   | 731.3831  | 1460.7516 | 1460.7511 | 0.37   | 0 | 70    | 2.1e-06 | 1    | ... | K.IFDEILVNAADNK.Q                  |
| <a href="#">4975</a>  | 105 - 117   | 731.3832  | 1460.7518 | 1460.7511 | 0.47   | 0 | 66    | 3.5e-06 | 1    | ... | K.IFDEILVNAADNK.Q                  |
| <a href="#">4976</a>  | 105 - 117   | 487.9246  | 1460.7519 | 1460.7511 | 0.55   | 0 | 41    | 0.00079 | 1    | ... | K.IFDEILVNAADNK.Q                  |
| <a href="#">4977</a>  | 105 - 117   | 731.3833  | 1460.7521 | 1460.7511 | 0.67   | 0 | 46    | 0.00032 | 1    | ... | K.IFDEILVNAADNK.Q                  |
| <a href="#">4978</a>  | 105 - 117   | 731.3835  | 1460.7524 | 1460.7511 | 0.93   | 0 | 66    | 2.2e-05 | 1    | ... | K.IFDEILVNAADNK.Q                  |
| <a href="#">8293</a>  | 128 - 144   | 943.4858  | 1884.9569 | 1884.9581 | -0.62  | 0 | 63    | 3.2e-06 | 1    | U   | K.VSIDPESNIISIWNNGK.G              |
| <a href="#">8294</a>  | 128 - 144   | 629.3264  | 1884.9575 | 1884.9581 | -0.31  | 0 | 58    | 6.3e-05 | 1    | U   | K.VSIDPESNIISIWNNGK.G              |
| <a href="#">8295</a>  | 128 - 144   | 943.4864  | 1884.9582 | 1884.9581 | 0.028  | 0 | 39    | 0.00023 | 1    | U   | K.VSIDPESNIISIWNNGK.G              |
| <a href="#">10221</a> | 156 - 177   | 1244.1181 | 2486.2216 | 2486.2217 | -0.021 | 0 | 85    | 1.2e-07 | 1    | U   | K.VYVPALIFGQLLTSSNYDDEK.K          |
| <a href="#">10222</a> | 156 - 177   | 829.7478  | 2486.2217 | 2486.2217 | 0.0048 | 0 | 53    | 3.2e-05 | 1    | U   | K.VYVPALIFGQLLTSSNYDDEK.K          |
| <a href="#">10224</a> | 156 - 177   | 829.7479  | 2486.2218 | 2486.2217 | 0.065  | 0 | 61    | 7.1e-06 | 1    | U   | K.VYVPALIFGQLLTSSNYDDEK.K          |
| <a href="#">10225</a> | 156 - 177   | 1244.1183 | 2486.2221 | 2486.2217 | 0.18   | 0 | 52    | 3.4e-05 | 1    | U   | K.VYVPALIFGQLLTSSNYDDEK.K          |
| <a href="#">10226</a> | 156 - 177   | 829.7482  | 2486.2228 | 2486.2217 | 0.46   | 0 | 32    | 0.0066  | 1    | U   | K.VYVPALIFGQLLTSSNYDDEK.K          |
| <a href="#">10227</a> | 156 - 177   | 1244.1188 | 2486.2231 | 2486.2217 | 0.57   | 0 | 92    | 2.1e-08 | 1    | U   | K.VYVPALIFGQLLTSSNYDDEK.K          |
| <a href="#">10229</a> | 156 - 177   | 1244.1217 | 2486.2289 | 2486.2217 | 2.91   | 0 | 69    | 1.8e-06 | 1    | U   | K.VYVPALIFGQLLTSSNYDDEK.K          |
| <a href="#">10496</a> | 156 - 178   | 872.4457  | 2614.3153 | 2614.3166 | -0.52  | 1 | 34    | 0.013   | 1    | U   | K.VYVPALIFGQLLTSSNYDDEK.V          |
| <a href="#">10498</a> | 156 - 178   | 654.5863  | 2614.3163 | 2614.3166 | -0.14  | 1 | 34    | 0.0087  | 1    | U   | K.VYVPALIFGQLLTSSNYDDEK.V          |
| <a href="#">10499</a> | 156 - 178   | 872.4462  | 2614.3168 | 2614.3166 | 0.075  | 1 | 47    | 0.00057 | 1    | U   | K.VYVPALIFGQLLTSSNYDDEK.V          |
| <a href="#">10500</a> | 156 - 178   | 654.5865  | 2614.3171 | 2614.3166 | 0.16   | 1 | 46    | 0.0028  | 1    | U   | K.VYVPALIFGQLLTSSNYDDEK.V          |
| <a href="#">10501</a> | 156 - 178   | 872.4463  | 2614.3171 | 2614.3166 | 0.17   | 1 | 37    | 0.0052  | 1    | U   | K.VYVPALIFGQLLTSSNYDDEK.V          |
| <a href="#">10502</a> | 156 - 178   | 872.4463  | 2614.3172 | 2614.3166 | 0.20   | 1 | 41    | 0.0086  | 1    | U   | K.VYVPALIFGQLLTSSNYDDEK.V          |
| <a href="#">10503</a> | 156 - 178   | 872.4464  | 2614.3173 | 2614.3166 | 0.26   | 1 | 62    | 8.2e-05 | 1    | U   | K.VYVPALIFGQLLTSSNYDDEK.V          |
| <a href="#">10506</a> | 156 - 178   | 872.4466  | 2614.3180 | 2614.3166 | 0.53   | 1 | 38    | 0.0049  | 1    | U   | K.VYVPALIFGQLLTSSNYDDEK.V          |
| <a href="#">10508</a> | 156 - 178   | 1308.1664 | 2614.3182 | 2614.3166 | 0.61   | 1 | 54    | 4.6e-05 | 1    | U   | K.VYVPALIFGQLLTSSNYDDEK.V          |
| <a href="#">10509</a> | 156 - 178   | 1308.1667 | 2614.3189 | 2614.3166 | 0.88   | 1 | 71    | 7.6e-06 | 1    | U   | K.VYVPALIFGQLLTSSNYDDEK.V          |
| <a href="#">10512</a> | 156 - 178   | 1308.1690 | 2614.3233 | 2614.3166 | 2.57   | 1 | 54    | 0.00027 | 1    | U   | K.VYVPALIFGQLLTSSNYDDEK.V          |
| <a href="#">1323</a>  | 190 - 197   | 491.7551  | 981.4956  | 981.4953  | 0.25   | 0 | 39    | 0.0013  | 1    | ... | K.LCNIFSTK.F                       |
| <a href="#">1141</a>  | 198 - 205   | 478.2311  | 954.4476  | 954.4481  | -0.49  | 0 | 25    | 0.017   | 1    | U   | K.FTVETACK.E                       |
| <a href="#">2884</a>  | 213 - 221   | 592.2565  | 1182.4985 | 1182.4984 | 0.089  | 0 | 22    | 0.015   | 1    | U   | K.QTWMNNMMK.T                      |
| <a href="#">2994</a>  | 213 - 221   | 600.2535  | 1198.4924 | 1198.4933 | -0.71  | 0 | 34    | 0.0083  | 1    | U   | K.QTWMNNMMK.T<br>+ Oxidation (M)   |
| <a href="#">2996</a>  | 213 - 221   | 600.2539  | 1198.4933 | 1198.4933 | 0.023  | 0 | 33    | 0.0089  | 1    | U   | K.QTWMNNMMK.T<br>+ Oxidation (M)   |
| <a href="#">2998</a>  | 213 - 221   | 600.2541  | 1198.4937 | 1198.4933 | 0.32   | 0 | 29    | 0.014   | 1    | U   | K.QTWMNNMMK.T<br>+ Oxidation (M)   |
| <a href="#">3097</a>  | 213 - 221   | 608.2511  | 1214.4877 | 1214.4882 | -0.41  | 0 | 21    | 0.015   | 1    | U   | K.QTWMNNMMK.T<br>+ 2 Oxidation (M) |
| <a href="#">3098</a>  | 213 - 221   | 608.2512  | 1214.4878 | 1214.4882 | -0.32  | 0 | 20    | 0.035   | 1    | U   | K.QTWMNNMMK.T<br>+ 2 Oxidation (M) |
| <a href="#">3100</a>  | 213 - 221   | 608.2513  | 1214.4880 | 1214.4882 | -0.17  | 0 | 31    | 0.01    | 1    | U   | K.QTWMNNMMK.T<br>+ 2 Oxidation (M) |
| <a href="#">3101</a>  | 213 - 221   | 608.2513  | 1214.4880 | 1214.4882 | -0.16  | 0 | 25    | 0.033   | 1    | U   | K.QTWMNNMMK.T<br>+ 2 Oxidation (M) |
| <a href="#">3102</a>  | 213 - 221   | 608.2513  | 1214.4881 | 1214.4882 | -0.11  | 0 | 18    | 0.028   | 1    | U   | K.QTWMNNMMK.T<br>+ 2 Oxidation (M) |
| <a href="#">3105</a>  | 213 - 221   | 608.2520  | 1214.4895 | 1214.4882 | 1.09   | 0 | 33    | 0.01    | 1    | U   | K.QTWMNNMMK.T<br>+ 2 Oxidation (M) |
| <a href="#">9383</a>  | 229 - 246   | 724.9898  | 2171.9475 | 2171.9470 | 0.21   | 0 | 33    | 0.0077  | 1    | U   | K.HFDGEDYTCITFQPDLSK.F             |
| <a href="#">3618</a>  | 252 - 262   | 637.8600  | 1273.7055 | 1273.7064 | -0.72  | 1 | 40    | 0.0019  | 1    | U   | K.LDKDIVALMTR.R                    |
| <a href="#">3621</a>  | 252 - 262   | 637.8603  | 1273.7060 | 1273.7064 | -0.28  | 1 | 31    | 0.027   | 1    | U   | K.LDKDIVALMTR.R                    |
| <a href="#">3622</a>  | 252 - 262   | 637.8603  | 1273.7060 | 1273.7064 | -0.27  | 1 | 46    | 0.00048 | 1    | U   | K.LDKDIVALMTR.R                    |
| <a href="#">3623</a>  | 252 - 262   | 637.8603  | 1273.7061 | 1273.7064 | -0.24  | 1 | 43    | 0.00049 | 1    | U   | K.LDKDIVALMTR.R                    |
| <a href="#">3627</a>  | 252 - 262   | 637.8606  | 1273.7067 | 1273.7064 | 0.23   | 1 | 62    | 2.9e-05 | 1    | U   | K.LDKDIVALMTR.R                    |
| <a href="#">3629</a>  | 252 - 262   | 425.5763  | 1273.7070 | 1273.7064 | 0.49   | 1 | 31    | 0.035   | 1    | U   | K.LDKDIVALMTR.R                    |
| <a href="#">3742</a>  | 252 - 262   | 645.8575  | 1289.7004 | 1289.7013 | -0.67  | 1 | 27    | 0.0079  | 1    | U   | K.LDKDIVALMTR.R<br>+ Oxidation (M) |
| <a href="#">3743</a>  | 252 - 262   | 645.8576  | 1289.7007 | 1289.7013 | -0.48  | 1 | 54    | 0.00027 | 1    | U   | K.LDKDIVALMTR.R<br>+ Oxidation (M) |
| <a href="#">3745</a>  | 252 - 262   | 430.9076  | 1289.7008 | 1289.7013 | -0.38  | 1 | 29    | 0.013   | 1    | U   | K.LDKDIVALMTR.R<br>+ Oxidation (M) |
| <a href="#">3746</a>  | 252 - 262   | 645.8577  | 1289.7008 | 1289.7013 | -0.37  | 1 | 34    | 0.0019  | 1    | U   | K.LDKDIVALMTR.R<br>+ Oxidation (M) |
| <a href="#">3748</a>  | 252 - 262   | 430.9076  | 1289.7011 | 1289.7013 | -0.19  | 1 | 23    | 0.043   | 1    | U   | K.LDKDIVALMTR.R<br>+ Oxidation (M) |
| <a href="#">3749</a>  | 252 - 262   | 430.9077  | 1289.7012 | 1289.7013 | -0.12  | 1 | 35    | 0.0036  | 1    | U   | K.LDKDIVALMTR.R<br>+ Oxidation (M) |
| <a href="#">3750</a>  | 252 - 262   | 645.8579  | 1289.7012 | 1289.7013 | -0.078 | 1 | 32    | 0.0072  | 1    | U   | K.LDKDIVALMTR.R<br>+ Oxidation (M) |
| <a href="#">3751</a>  | 252 - 262   | 430.9077  | 1289.7013 | 1289.7013 | -0.029 | 1 | 41    | 0.0042  | 1    | U   | K.LDKDIVALMTR.R<br>+ Oxidation (M) |
| <a href="#">3752</a>  | 252 - 262   | 645.8580  | 1289.7014 | 1289.7013 | 0.11   | 1 | 51    | 6.6e-05 | 1    | U   | K.LDKDIVALMTR.R<br>+ Oxidation (M) |
| <a href="#">3753</a>  | 252 - 262   | 430.9078  | 1289.7015 | 1289.7013 | 0.11   | 1 | 33    | 0.0088  | 1    | U   | K.LDKDIVALMTR.R<br>+ Oxidation (M) |
| <a href="#">3754</a>  | 252 - 262   | 645.8580  | 1289.7015 | 1289.7013 | 0.15   | 1 | 49    | 0.00016 | 1    | U   | K.LDKDIVALMTR.R<br>+ Oxidation (M) |
| <a href="#">3755</a>  | 252 - 262   | 430.9078  | 1289.7015 | 1289.7013 | 0.16   | 1 | 29    | 0.0054  | 1    | U   | K.LDKDIVALMTR.R<br>+ Oxidation (M) |
| <a href="#">3756</a>  | 252 - 262   | 645.8581  | 1289.7016 | 1289.7013 | 0.20   | 1 | 68    | 1.5e-06 | 1    | U   | K.LDKDIVALMTR.R<br>+ Oxidation (M) |
| <a href="#">3757</a>  | 252 - 262   | 430.9080  | 1289.7021 | 1289.7013 | 0.60   | 1 | 40    | 0.0017  | 1    | U   | K.LDKDIVALMTR.R<br>+ Oxidation (M) |
| <a href="#">937</a>   | 255 - 262   | 459.7572  | 917.4998  | 917.5004  | -0.65  | 0 | 49    | 0.0002  | 1    | U   | K.DIVALMTR.R                       |
| <a href="#">1035</a>  | 255 - 262   | 467.7546  | 933.4947  | 933.4953  | -0.68  | 0 | 38    | 0.0091  | 1    | U   | K.DIVALMTR.R<br>+ Oxidation (M)    |

| Query                 | Start - End | Observed | Mr (expt) | Mr (calc) | ppm     | M | Score | Expect  | Rank | U | Peptide                         |
|-----------------------|-------------|----------|-----------|-----------|---------|---|-------|---------|------|---|---------------------------------|
| <a href="#">1039</a>  | 255 - 262   | 467.7551 | 933.4956  | 933.4953  | 0.28    | 0 | 32    | 0.037   | 1    | U | K.DIVALMTR.R<br>+ Oxidation (M) |
| <a href="#">1040</a>  | 255 - 262   | 467.7552 | 933.4958  | 933.4953  | 0.47    | 0 | 49    | 0.00068 | 1    | U | K.DIVALMTR.R<br>+ Oxidation (M) |
| <a href="#">1504</a>  | 264 - 272   | 506.7295 | 1011.4444 | 1011.4444 | 0.022   | 0 | 30    | 0.0042  | 1    | U | R.AYDLAGSCR.G                   |
| <a href="#">1338</a>  | 290 - 297   | 493.7632 | 985.5119  | 985.5120  | -0.092  | 0 | 30    | 0.021   | 1    | U | R.SYVDLVK.D                     |
| <a href="#">1339</a>  | 290 - 297   | 493.7634 | 985.5122  | 985.5120  | 0.15    | 0 | 32    | 0.013   | 1    | U | R.SYVDLVK.D                     |
| <a href="#">1340</a>  | 290 - 297   | 493.7635 | 985.5125  | 985.5120  | 0.48    | 0 | 43    | 0.00061 | 1    | U | R.SYVDLVK.D                     |
| <a href="#">2923</a>  | 298 - 308   | 594.8269 | 1187.6392 | 1187.6398 | -0.49   | 1 | 48    | 0.00032 | 1    | U | K.DKLDETGVALK.V                 |
| <a href="#">2924</a>  | 298 - 308   | 594.8269 | 1187.6393 | 1187.6398 | -0.36   | 1 | 24    | 0.023   | 1    | U | K.DKLDETGVALK.V                 |
| <a href="#">2926</a>  | 298 - 308   | 396.8871 | 1187.6395 | 1187.6398 | -0.21   | 1 | 31    | 0.028   | 1    | U | K.DKLDETGVALK.V                 |
| <a href="#">2930</a>  | 298 - 308   | 594.8272 | 1187.6398 | 1187.6398 | 0.078   | 1 | 29    | 0.017   | 1    | U | K.DKLDETGVALK.V                 |
| <a href="#">1097</a>  | 300 - 308   | 473.2661 | 944.5176  | 944.5179  | -0.28   | 0 | 49    | 0.00057 | 1    | U | K.LDETGVALK.V                   |
| <a href="#">2030</a>  | 309 - 317   | 360.8641 | 1079.5704 | 1079.5723 | -1.80   | 0 | 26    | 0.035   | 1    | U | K.VIHELANER.W                   |
| <a href="#">2033</a>  | 309 - 317   | 360.8646 | 1079.5719 | 1079.5723 | -0.41   | 0 | 26    | 0.025   | 1    | U | K.VIHELANER.W                   |
| <a href="#">2034</a>  | 309 - 317   | 360.8646 | 1079.5719 | 1079.5723 | -0.38   | 0 | 36    | 0.012   | 1    | U | K.VIHELANER.W                   |
| <a href="#">2035</a>  | 309 - 317   | 540.7933 | 1079.5720 | 1079.5723 | -0.26   | 0 | 47    | 0.00065 | 1    | U | K.VIHELANER.W                   |
| <a href="#">2037</a>  | 309 - 317   | 540.7934 | 1079.5722 | 1079.5723 | -0.13   | 0 | 39    | 0.0016  | 1    | U | K.VIHELANER.W                   |
| <a href="#">2038</a>  | 309 - 317   | 540.7934 | 1079.5722 | 1079.5723 | -0.13   | 0 | 27    | 0.037   | 1    | U | K.VIHELANER.W                   |
| <a href="#">2041</a>  | 309 - 317   | 360.8647 | 1079.5723 | 1079.5723 | -0.023  | 0 | 32    | 0.019   | 1    | U | K.VIHELANER.W                   |
| <a href="#">2043</a>  | 309 - 317   | 360.8647 | 1079.5724 | 1079.5723 | 0.032   | 0 | 27    | 0.033   | 1    | U | K.VIHELANER.W                   |
| <a href="#">2044</a>  | 309 - 317   | 360.8647 | 1079.5724 | 1079.5723 | 0.060   | 0 | 29    | 0.0093  | 1    | U | K.VIHELANER.W                   |
| <a href="#">2045</a>  | 309 - 317   | 540.7935 | 1079.5724 | 1079.5723 | 0.094   | 0 | 50    | 0.00029 | 1    | U | K.VIHELANER.W                   |
| <a href="#">2046</a>  | 309 - 317   | 360.8648 | 1079.5725 | 1079.5723 | 0.14    | 0 | 32    | 0.0089  | 1    | U | K.VIHELANER.W                   |
| <a href="#">2047</a>  | 309 - 317   | 540.7937 | 1079.5728 | 1079.5723 | 0.43    | 0 | 45    | 0.00072 | 1    | U | K.VIHELANER.W                   |
| <a href="#">2048</a>  | 309 - 317   | 540.7937 | 1079.5729 | 1079.5723 | 0.54    | 0 | 26    | 0.011   | 1    | U | K.VIHELANER.W                   |
| <a href="#">3403</a>  | 318 - 327   | 625.8079 | 1249.6013 | 1249.6013 | 0.012   | 0 | 42    | 0.00034 | 1    | U | R.WDVCLTFLSEK.G                 |
| <a href="#">6503</a>  | 328 - 342   | 820.9348 | 1639.8550 | 1639.8570 | -1.21   | 0 | 67    | 1.5e-06 | 1    | U | K.GFQQISFVNSIATTK.G             |
| <a href="#">6505</a>  | 328 - 342   | 820.9350 | 1639.8554 | 1639.8570 | -0.97   | 0 | 28    | 0.0051  | 1    | U | K.GFQQISFVNSIATTK.G             |
| <a href="#">6507</a>  | 328 - 342   | 547.6258 | 1639.8557 | 1639.8570 | -0.80   | 0 | 46    | 0.00013 | 1    | U | K.GFQQISFVNSIATTK.G             |
| <a href="#">6508</a>  | 328 - 342   | 820.9351 | 1639.8557 | 1639.8570 | -0.76   | 0 | 14    | 0.045   | 1    | U | K.GFQQISFVNSIATTK.G             |
| <a href="#">6509</a>  | 328 - 342   | 820.9352 | 1639.8557 | 1639.8570 | -0.75   | 0 | 32    | 0.0035  | 1    | U | K.GFQQISFVNSIATTK.G             |
| <a href="#">6510</a>  | 328 - 342   | 820.9352 | 1639.8558 | 1639.8570 | -0.74   | 0 | 56    | 7.4e-06 | 1    | U | K.GFQQISFVNSIATTK.G             |
| <a href="#">6513</a>  | 328 - 342   | 820.9354 | 1639.8562 | 1639.8570 | -0.46   | 0 | 53    | 0.00042 | 1    | U | K.GFQQISFVNSIATTK.G             |
| <a href="#">6515</a>  | 328 - 342   | 820.9358 | 1639.8570 | 1639.8570 | 0.042   | 0 | 37    | 0.0021  | 1    | U | K.GFQQISFVNSIATTK.G             |
| <a href="#">6516</a>  | 328 - 342   | 820.9358 | 1639.8571 | 1639.8570 | 0.066   | 0 | 30    | 0.019   | 1    | U | K.GFQQISFVNSIATTK.G             |
| <a href="#">6518</a>  | 328 - 342   | 820.9358 | 1639.8571 | 1639.8570 | 0.10    | 0 | 58    | 0.00012 | 1    | U | K.GFQQISFVNSIATTK.G             |
| <a href="#">6519</a>  | 328 - 342   | 820.9359 | 1639.8572 | 1639.8570 | 0.13    | 0 | 43    | 0.0006  | 1    | U | K.GFQQISFVNSIATTK.G             |
| <a href="#">6520</a>  | 328 - 342   | 547.6264 | 1639.8572 | 1639.8570 | 0.15    | 0 | 42    | 0.0006  | 1    | U | K.GFQQISFVNSIATTK.G             |
| <a href="#">6521</a>  | 328 - 342   | 820.9361 | 1639.8577 | 1639.8570 | 0.43    | 0 | 54    | 0.00024 | 1    | U | K.GFQQISFVNSIATTK.G             |
| <a href="#">6522</a>  | 328 - 342   | 547.6265 | 1639.8577 | 1639.8570 | 0.44    | 0 | 57    | 9.8e-06 | 1    | U | K.GFQQISFVNSIATTK.G             |
| <a href="#">6524</a>  | 328 - 342   | 820.9362 | 1639.8579 | 1639.8570 | 0.57    | 0 | 48    | 0.0012  | 1    | U | K.GFQQISFVNSIATTK.G             |
| <a href="#">6525</a>  | 328 - 342   | 820.9363 | 1639.8581 | 1639.8570 | 0.66    | 0 | 64    | 3.4e-05 | 1    | U | K.GFQQISFVNSIATTK.G             |
| <a href="#">6527</a>  | 328 - 342   | 547.6267 | 1639.8582 | 1639.8570 | 0.75    | 0 | 39    | 0.00025 | 1    | U | K.GFQQISFVNSIATTK.G             |
| <a href="#">6528</a>  | 328 - 342   | 547.6267 | 1639.8583 | 1639.8570 | 0.83    | 0 | 30    | 0.0043  | 1    | U | K.GFQQISFVNSIATTK.G             |
| <a href="#">6529</a>  | 328 - 342   | 820.9366 | 1639.8586 | 1639.8570 | 0.97    | 0 | 95    | 2.5e-08 | 1    | U | K.GFQQISFVNSIATTK.G             |
| <a href="#">6531</a>  | 328 - 342   | 820.9369 | 1639.8592 | 1639.8570 | 1.33    | 0 | 53    | 0.00014 | 1    | U | K.GFQQISFVNSIATTK.G             |
| <a href="#">4212</a>  | 346 - 357   | 679.3584 | 1356.7022 | 1356.7038 | -1.14   | 0 | 36    | 0.00056 | 1    | U | R.HVDYVVDQVVGK.L                |
| <a href="#">4214</a>  | 346 - 357   | 679.3587 | 1356.7029 | 1356.7038 | -0.65   | 0 | 81    | 7.3e-08 | 1    | U | R.HVDYVVDQVVGK.L                |
| <a href="#">4215</a>  | 346 - 357   | 453.2416 | 1356.7030 | 1356.7038 | -0.59   | 0 | 40    | 0.0077  | 1    | U | R.HVDYVVDQVVGK.L                |
| <a href="#">4216</a>  | 346 - 357   | 679.3588 | 1356.7031 | 1356.7038 | -0.48   | 0 | 77    | 1.2e-07 | 1    | U | R.HVDYVVDQVVGK.L                |
| <a href="#">4217</a>  | 346 - 357   | 679.3590 | 1356.7034 | 1356.7038 | -0.30   | 0 | 46    | 0.00017 | 1    | U | R.HVDYVVDQVVGK.L                |
| <a href="#">4218</a>  | 346 - 357   | 679.3590 | 1356.7034 | 1356.7038 | -0.27   | 0 | 75    | 2.5e-07 | 1    | U | R.HVDYVVDQVVGK.L                |
| <a href="#">4219</a>  | 346 - 357   | 679.3590 | 1356.7035 | 1356.7038 | -0.23   | 0 | 47    | 0.00018 | 1    | U | R.HVDYVVDQVVGK.L                |
| <a href="#">4220</a>  | 346 - 357   | 679.3592 | 1356.7038 | 1356.7038 | 0.038   | 0 | 77    | 1.5e-07 | 1    | U | R.HVDYVVDQVVGK.L                |
| <a href="#">4221</a>  | 346 - 357   | 679.3592 | 1356.7039 | 1356.7038 | 0.053   | 0 | 62    | 4.7e-06 | 1    | U | R.HVDYVVDQVVGK.L                |
| <a href="#">4222</a>  | 346 - 357   | 679.3592 | 1356.7039 | 1356.7038 | 0.068   | 0 | 43    | 0.00032 | 1    | U | R.HVDYVVDQVVGK.L                |
| <a href="#">4223</a>  | 346 - 357   | 679.3593 | 1356.7040 | 1356.7038 | 0.16    | 0 | 61    | 2.1e-06 | 1    | U | R.HVDYVVDQVVGK.L                |
| <a href="#">4225</a>  | 346 - 357   | 679.3593 | 1356.7041 | 1356.7038 | 0.22    | 0 | 57    | 1.6e-05 | 1    | U | R.HVDYVVDQVVGK.L                |
| <a href="#">4226</a>  | 346 - 357   | 679.3594 | 1356.7042 | 1356.7038 | 0.33    | 0 | 79    | 1.5e-07 | 1    | U | R.HVDYVVDQVVGK.L                |
| <a href="#">4227</a>  | 346 - 357   | 679.3594 | 1356.7043 | 1356.7038 | 0.35    | 0 | 41    | 0.00028 | 1    | U | R.HVDYVVDQVVGK.L                |
| <a href="#">4228</a>  | 346 - 357   | 679.3594 | 1356.7043 | 1356.7038 | 0.36    | 0 | 48    | 0.0001  | 1    | U | R.HVDYVVDQVVGK.L                |
| <a href="#">4229</a>  | 346 - 357   | 453.2421 | 1356.7046 | 1356.7038 | 0.59    | 0 | 40    | 0.0046  | 1    | U | R.HVDYVVDQVVGK.L                |
| <a href="#">4230</a>  | 346 - 357   | 679.3601 | 1356.7057 | 1356.7038 | 1.41    | 0 | 74    | 2.6e-07 | 1    | U | R.HVDYVVDQVVGK.L                |
| <a href="#">482</a>   | 358 - 364   | 414.7811 | 827.5476  | 827.5480  | -0.47   | 1 | 32    | 0.0045  | 1    | U | K.LIEVVK.K                      |
| <a href="#">2710</a>  | 368 - 378   | 580.3447 | 1158.6749 | 1158.6761 | -1.01   | 0 | 47    | 0.00049 | 1    | U | K.AGVSVKPFQVK.N                 |
| <a href="#">2711</a>  | 368 - 378   | 387.2324 | 1158.6755 | 1158.6761 | -0.55   | 0 | 30    | 0.014   | 1    | U | K.AGVSVKPFQVK.N                 |
| <a href="#">2716</a>  | 368 - 378   | 387.2326 | 1158.6759 | 1158.6761 | -0.22   | 0 | 35    | 0.0082  | 1    | U | K.AGVSVKPFQVK.N                 |
| <a href="#">2721</a>  | 368 - 378   | 580.3454 | 1158.6762 | 1158.6761 | 0.074   | 0 | 23    | 0.037   | 1    | U | K.AGVSVKPFQVK.N                 |
| <a href="#">2722</a>  | 368 - 378   | 580.3454 | 1158.6763 | 1158.6761 | 0.16    | 0 | 42    | 0.0015  | 1    | U | K.AGVSVKPFQVK.N                 |
| <a href="#">2727</a>  | 368 - 378   | 580.3467 | 1158.6788 | 1158.6761 | 2.32    | 0 | 32    | 0.009   | 1    | U | K.AGVSVKPFQVK.N                 |
| <a href="#">10414</a> | 379 - 399   | 859.4246 | 2575.2520 | 2575.2529 | -0.38   | 0 | 52    | 0.00078 | 1    | U | K.NHIWVFINCLINPTFDSQTK.E        |
| <a href="#">10415</a> | 379 - 399   | 859.4272 | 2575.2597 | 2575.2529 | 2.62    | 0 | 37    | 0.025   | 1    | U | K.NHIWVFINCLINPTFDSQTK.E        |
| <a href="#">2010</a>  | 438 - 446   | 539.3061 | 1076.5977 | 1076.5978 | -0.13   | 1 | 31    | 0.0064  | 1    | U | K.FKAQTQLNK.K                   |
| <a href="#">378</a>   | 440 - 446   | 401.7245 | 801.4345  | 801.4344  | 0.025   | 0 | 32    | 0.028   | 1    | U | K.AQTQLNK.K                     |
| <a href="#">1273</a>  | 462 - 471   | 488.2225 | 974.4305  | 974.4305  | -0.0082 | 0 | 57    | 9.8e-05 | 1    | U | K.LDDANDAGGK.H                  |
| <a href="#">1274</a>  | 462 - 471   | 488.2227 | 974.4308  | 974.4305  | 0.34    | 0 | 60    | 5.3e-05 | 1    | U | K.LDDANDAGGK.H                  |
| <a href="#">7515</a>  | 472 - 487   | 591.9609 | 1772.8608 | 1772.8614 | -0.38   | 0 | 27    | 0.022   | 1    | U | K.HSLECLLITTEGDSAK.S            |
| <a href="#">7516</a>  | 472 - 487   | 887.4381 | 1772.8617 | 1772.8614 | 0.12    | 0 | 112   | 2.6e-10 | 1    | U | K.HSLECLLITTEGDSAK.S            |
| <a href="#">2432</a>  | 488 - 499   | 564.8401 | 1127.6657 | 1127.6663 | -0.47   | 0 | 64    | 3.8e-06 | 1    | U | K.SLAVSGLGVIGR.D                |
| <a href="#">2434</a>  | 488 - 499   | 376.8959 | 1127.6659 | 1127.6663 | -0.29   | 0 | 34    | 0.0059  | 1    | U | K.SLAVSGLGVIGR.D                |
| <a href="#">2435</a>  | 488 - 499   | 564.8403 | 1127.6660 | 1127.6663 | -0.21   | 0 | 56    | 3.9e-05 | 1    | U | K.SLAVSGLGVIGR.D                |
| <a href="#">2436</a>  | 488 - 499   | 564.8403 | 1127.6660 | 1127.6663 | -0.19   | 0 | 42    | 0.00053 | 1    | U | K.SLAVSGLGVIGR.D                |
| <a href="#">2437</a>  | 488 - 499   | 564.8403 | 1127.6660 | 1127.6663 | -0.19   | 0 | 44    | 0.00015 | 1    | U | K.SLAVSGLGVIGR.D                |
| <a href="#">2438</a>  | 488 - 499   | 564.8405 | 1127.6664 | 1127.6663 | 0.15    | 0 | 70    | 1.8e-06 | 1    | U | K.SLAVSGLGVIGR.D                |
| <a href="#">2439</a>  | 488 - 499   | 564.8405 | 1127.6665 | 1127.6663 | 0.18    | 0 | 33    | 0.0013  |      |   |                                 |

| Query                | Start - End | Observed | Mr (expt) | Mr (calc) | ppm    | M | Score | Expect  | Rank | U | Peptide                               |
|----------------------|-------------|----------|-----------|-----------|--------|---|-------|---------|------|---|---------------------------------------|
| <a href="#">2447</a> | 488 - 499   | 564.8408 | 1127.6670 | 1127.6663 | 0.65   | 0 | 72    | 1.6e-06 | 1    | U | K.SLAVSGLGVIGR.D                      |
| <a href="#">2448</a> | 488 - 499   | 564.8409 | 1127.6672 | 1127.6663 | 0.88   | 0 | 51    | 5e-05   | 1    | U | K.SLAVSGLGVIGR.D                      |
| <a href="#">2375</a> | 500 - 508   | 561.8063 | 1121.5980 | 1121.5982 | -0.17  | 1 | 31    | 0.027   | 1    | U | R.DRYGVFPLR.G                         |
| <a href="#">594</a>  | 502 - 508   | 426.2423 | 850.4700  | 850.4701  | -0.16  | 0 | 27    | 0.037   | 1    |   | R.YGVFPLR.G                           |
| <a href="#">596</a>  | 502 - 508   | 426.2430 | 850.4714  | 850.4701  | 1.46   | 0 | 28    | 0.0033  | 1    |   | R.YGVFPLR.G                           |
| <a href="#">5646</a> | 521 - 533   | 510.6045 | 1528.7916 | 1528.7919 | -0.17  | 0 | 51    | 0.00055 | 1    |   | K.QIMENAEINNIK.I                      |
| <a href="#">5647</a> | 521 - 533   | 510.6046 | 1528.7921 | 1528.7919 | 0.13   | 0 | 25    | 0.024   | 1    |   | K.QIMENAEINNIK.I                      |
| <a href="#">5812</a> | 521 - 533   | 773.3999 | 1544.7852 | 1544.7868 | -1.04  | 0 | 62    | 2.2e-05 | 1    |   | K.QIMENAEINNIK.I + Oxidation (M)      |
| <a href="#">5813</a> | 521 - 533   | 773.4005 | 1544.7864 | 1544.7868 | -0.25  | 0 | 64    | 1.7e-05 | 1    |   | K.QIMENAEINNIK.I + Oxidation (M)      |
| <a href="#">5814</a> | 521 - 533   | 773.4006 | 1544.7866 | 1544.7868 | -0.10  | 0 | 48    | 0.00034 | 1    |   | K.QIMENAEINNIK.I + Oxidation (M)      |
| <a href="#">5815</a> | 521 - 533   | 773.4007 | 1544.7869 | 1544.7868 | 0.077  | 0 | 57    | 7.9e-05 | 1    |   | K.QIMENAEINNIK.I + Oxidation (M)      |
| <a href="#">5816</a> | 521 - 533   | 773.4012 | 1544.7878 | 1544.7868 | 0.67   | 0 | 60    | 9.1e-05 | 1    |   | K.QIMENAEINNIK.I + Oxidation (M)      |
| <a href="#">440</a>  | 534 - 540   | 410.7499 | 819.4852  | 819.4854  | -0.24  | 0 | 25    | 0.022   | 1    |   | K.IVGLQYK.K                           |
| <a href="#">443</a>  | 534 - 540   | 410.7500 | 819.4854  | 819.4854  | -0.024 | 0 | 24    | 0.017   | 1    |   | K.IVGLQYK.K                           |
| <a href="#">445</a>  | 534 - 540   | 410.7500 | 819.4855  | 819.4854  | 0.073  | 0 | 21    | 0.048   | 1    |   | K.IVGLQYK.K                           |
| <a href="#">447</a>  | 534 - 540   | 410.7501 | 819.4857  | 819.4854  | 0.32   | 0 | 38    | 0.0022  | 1    |   | K.IVGLQYK.K                           |
| <a href="#">2666</a> | 541 - 550   | 578.2799 | 1154.5453 | 1154.5455 | -0.15  | 1 | 32    | 0.0015  | 1    | U | K.KSYDDAESLK.T                        |
| <a href="#">2667</a> | 541 - 550   | 578.2799 | 1154.5453 | 1154.5455 | -0.15  | 1 | 30    | 0.0014  | 1    | U | K.KSYDDAESLK.T                        |
| <a href="#">2669</a> | 541 - 550   | 578.2801 | 1154.5457 | 1154.5455 | 0.16   | 1 | 30    | 0.014   | 1    | U | K.KSYDDAESLK.T                        |
| <a href="#">2671</a> | 541 - 550   | 578.2802 | 1154.5459 | 1154.5455 | 0.39   | 1 | 30    | 0.0022  | 1    | U | K.KSYDDAESLK.T                        |
| <a href="#">1609</a> | 542 - 550   | 514.2325 | 1026.4505 | 1026.4505 | -0.057 | 0 | 26    | 0.012   | 1    | U | K.SYDDAESLK.T                         |
| <a href="#">1610</a> | 542 - 550   | 514.2326 | 1026.4506 | 1026.4505 | 0.041  | 0 | 21    | 0.043   | 1    | U | K.SYDDAESLK.T                         |
| <a href="#">1611</a> | 542 - 550   | 514.2327 | 1026.4508 | 1026.4505 | 0.29   | 0 | 23    | 0.013   | 1    | U | K.SYDDAESLK.T                         |
| <a href="#">1612</a> | 542 - 550   | 514.2328 | 1026.4511 | 1026.4505 | 0.53   | 0 | 39    | 0.00037 | 1    | U | K.SYDDAESLK.T                         |
| <a href="#">7211</a> | 557 - 571   | 866.4051 | 1730.7956 | 1730.7968 | -0.64  | 0 | 57    | 2.1e-05 | 1    |   | K.IMIMTDQDQDGSNIK.G                   |
| <a href="#">7215</a> | 557 - 571   | 577.9395 | 1730.7968 | 1730.7968 | 0.023  | 0 | 34    | 0.007   | 1    |   | K.IMIMTDQDQDGSNIK.G                   |
| <a href="#">7216</a> | 557 - 571   | 866.4058 | 1730.7970 | 1730.7968 | 0.14   | 0 | 72    | 1.4e-06 | 1    |   | K.IMIMTDQDQDGSNIK.G                   |
| <a href="#">7219</a> | 557 - 571   | 433.7066 | 1730.7972 | 1730.7968 | 0.24   | 0 | 28    | 0.029   | 1    |   | K.IMIMTDQDQDGSNIK.G                   |
| <a href="#">7220</a> | 557 - 571   | 866.4059 | 1730.7973 | 1730.7968 | 0.31   | 0 | 77    | 1.1e-06 | 1    |   | K.IMIMTDQDQDGSNIK.G                   |
| <a href="#">7222</a> | 557 - 571   | 577.9397 | 1730.7974 | 1730.7968 | 0.37   | 0 | 30    | 0.035   | 1    |   | K.IMIMTDQDQDGSNIK.G                   |
| <a href="#">7223</a> | 557 - 571   | 577.9400 | 1730.7981 | 1730.7968 | 0.77   | 0 | 29    | 0.012   | 1    |   | K.IMIMTDQDQDGSNIK.G                   |
| <a href="#">7229</a> | 557 - 571   | 866.4070 | 1730.7995 | 1730.7968 | 1.59   | 0 | 38    | 0.00067 | 1    |   | K.IMIMTDQDQDGSNIK.G                   |
| <a href="#">7322</a> | 557 - 571   | 874.4023 | 1746.7900 | 1746.7917 | -0.98  | 0 | 75    | 3.9e-07 | 1    |   | K.IMIMTDQDQDGSNIK.G + Oxidation (M)   |
| <a href="#">7323</a> | 557 - 571   | 874.4023 | 1746.7901 | 1746.7917 | -0.91  | 0 | 79    | 1.5e-06 | 1    |   | K.IMIMTDQDQDGSNIK.G + Oxidation (M)   |
| <a href="#">7326</a> | 557 - 571   | 874.4028 | 1746.7910 | 1746.7917 | -0.37  | 0 | 60    | 0.00011 | 1    |   | K.IMIMTDQDQDGSNIK.G + Oxidation (M)   |
| <a href="#">7327</a> | 557 - 571   | 874.4028 | 1746.7911 | 1746.7917 | -0.33  | 0 | 71    | 1.5e-06 | 1    |   | K.IMIMTDQDQDGSNIK.G + Oxidation (M)   |
| <a href="#">7328</a> | 557 - 571   | 874.4028 | 1746.7911 | 1746.7917 | -0.31  | 0 | 84    | 1.7e-07 | 1    |   | K.IMIMTDQDQDGSNIK.G + Oxidation (M)   |
| <a href="#">7331</a> | 557 - 571   | 583.2711 | 1746.7916 | 1746.7917 | -0.063 | 0 | 47    | 0.0022  | 1    |   | K.IMIMTDQDQDGSNIK.G + Oxidation (M)   |
| <a href="#">7332</a> | 557 - 571   | 583.2713 | 1746.7920 | 1746.7917 | 0.18   | 0 | 31    | 0.012   | 1    |   | K.IMIMTDQDQDGSNIK.G + Oxidation (M)   |
| <a href="#">7334</a> | 557 - 571   | 583.2714 | 1746.7922 | 1746.7917 | 0.31   | 0 | 49    | 0.00062 | 1    |   | K.IMIMTDQDQDGSNIK.G + Oxidation (M)   |
| <a href="#">7335</a> | 557 - 571   | 583.2714 | 1746.7923 | 1746.7917 | 0.38   | 0 | 46    | 0.0027  | 1    |   | K.IMIMTDQDQDGSNIK.G + Oxidation (M)   |
| <a href="#">7338</a> | 557 - 571   | 583.2717 | 1746.7933 | 1746.7917 | 0.93   | 0 | 33    | 0.028   | 1    |   | K.IMIMTDQDQDGSNIK.G + Oxidation (M)   |
| <a href="#">7339</a> | 557 - 571   | 583.2718 | 1746.7935 | 1746.7917 | 1.02   | 0 | 49    | 0.00052 | 1    |   | K.IMIMTDQDQDGSNIK.G + Oxidation (M)   |
| <a href="#">7441</a> | 557 - 571   | 588.6023 | 1762.7850 | 1762.7866 | -0.91  | 0 | 61    | 4.2e-05 | 1    |   | K.IMIMTDQDQDGSNIK.G + 2 Oxidation (M) |
| <a href="#">7442</a> | 557 - 571   | 588.6023 | 1762.7852 | 1762.7866 | -0.79  | 0 | 24    | 0.027   | 1    |   | K.IMIMTDQDQDGSNIK.G + 2 Oxidation (M) |
| <a href="#">7443</a> | 557 - 571   | 588.6025 | 1762.7856 | 1762.7866 | -0.57  | 0 | 51    | 0.00028 | 1    |   | K.IMIMTDQDQDGSNIK.G + 2 Oxidation (M) |
| <a href="#">7444</a> | 557 - 571   | 588.6025 | 1762.7857 | 1762.7866 | -0.52  | 0 | 36    | 0.0032  | 1    |   | K.IMIMTDQDQDGSNIK.G + 2 Oxidation (M) |
| <a href="#">7446</a> | 557 - 571   | 588.6026 | 1762.7858 | 1762.7866 | -0.44  | 0 | 58    | 5.9e-05 | 1    |   | K.IMIMTDQDQDGSNIK.G + 2 Oxidation (M) |
| <a href="#">7448</a> | 557 - 571   | 882.4002 | 1762.7859 | 1762.7866 | -0.39  | 0 | 76    | 2.8e-06 | 1    |   | K.IMIMTDQDQDGSNIK.G + 2 Oxidation (M) |
| <a href="#">7450</a> | 557 - 571   | 882.4004 | 1762.7863 | 1762.7866 | -0.15  | 0 | 61    | 9.2e-05 | 1    |   | K.IMIMTDQDQDGSNIK.G + 2 Oxidation (M) |
| <a href="#">7451</a> | 557 - 571   | 588.6028 | 1762.7864 | 1762.7866 | -0.096 | 0 | 41    | 0.0014  | 1    |   | K.IMIMTDQDQDGSNIK.G + 2 Oxidation (M) |
| <a href="#">7452</a> | 557 - 571   | 882.4005 | 1762.7865 | 1762.7866 | -0.058 | 0 | 60    | 0.00011 | 1    |   | K.IMIMTDQDQDGSNIK.G + 2 Oxidation (M) |
| <a href="#">7453</a> | 557 - 571   | 588.6029 | 1762.7868 | 1762.7866 | 0.11   | 0 | 35    | 0.0019  | 1    |   | K.IMIMTDQDQDGSNIK.G + 2 Oxidation (M) |
| <a href="#">7454</a> | 557 - 571   | 588.6029 | 1762.7868 | 1762.7866 | 0.13   | 0 | 26    | 0.038   | 1    |   | K.IMIMTDQDQDGSNIK.G + 2 Oxidation (M) |
| <a href="#">7455</a> | 557 - 571   | 588.6029 | 1762.7868 | 1762.7866 | 0.14   | 0 | 57    | 0.00022 | 1    |   | K.IMIMTDQDQDGSNIK.G + 2 Oxidation (M) |
| <a href="#">7456</a> | 557 - 571   | 882.4007 | 1762.7868 | 1762.7866 | 0.15   | 0 | 58    | 0.00019 | 1    |   | K.IMIMTDQDQDGSNIK.G + 2 Oxidation (M) |
| <a href="#">7457</a> | 557 - 571   | 588.6030 | 1762.7872 | 1762.7866 | 0.33   | 0 | 33    | 0.0044  | 1    |   | K.IMIMTDQDQDGSNIK.G + 2 Oxidation (M) |
| <a href="#">7459</a> | 557 - 571   | 882.4011 | 1762.7877 | 1762.7866 | 0.61   | 0 | 61    | 8.4e-05 | 1    |   | K.IMIMTDQDQDGSNIK.G + 2 Oxidation (M) |
| <a href="#">7460</a> | 557 - 571   | 588.6034 | 1762.7883 | 1762.7866 | 0.96   | 0 | 46    | 0.0003  | 1    |   | K.IMIMTDQDQDGSNIK.G + 2 Oxidation (M) |
| <a href="#">8370</a> | 572 - 587   | 634.6956 | 1901.0651 | 1901.0676 | -1.28  | 0 | 22    | 0.015   | 1    | U | K.GLLINFIHNNWPSLLK.H                  |
| <a href="#">8372</a> | 572 - 587   | 634.6963 | 1901.0671 | 1901.0676 | -0.22  | 0 | 22    | 0.015   | 1    | U | K.GLLINFIHNNWPSLLK.H                  |
| <a href="#">8373</a> | 572 - 587   | 634.6964 | 1901.0673 | 1901.0676 | -0.11  | 0 | 36    | 0.0036  | 1    | U | K.GLLINFIHNNWPSLLK.H                  |
| <a href="#">8374</a> | 572 - 587   | 634.6964 | 1901.0674 | 1901.0676 | -0.078 | 0 | 21    | 0.024   | 1    | U | K.GLLINFIHNNWPSLLK.H                  |

| Query                | Start - End | Observed  | Mr (expt) | Mr (calc) | ppm     | M | Score | Expect  | Rank | U | Peptide                         |
|----------------------|-------------|-----------|-----------|-----------|---------|---|-------|---------|------|---|---------------------------------|
| <a href="#">8377</a> | 572 - 587   | 951.5412  | 1901.0678 | 1901.0676 | 0.11    | 0 | 42    | 0.00012 | 1    | U | K.GLLINFIHNNWPSLLK.H            |
| <a href="#">8380</a> | 572 - 587   | 634.6968  | 1901.0685 | 1901.0676 | 0.47    | 0 | 27    | 0.0045  | 1    | U | K.GLLINFIHNNWPSLLK.H            |
| <a href="#">8381</a> | 572 - 587   | 951.5416  | 1901.0686 | 1901.0676 | 0.57    | 0 | 64    | 1.5e-06 | 1    | U | K.GLLINFIHNNWPSLLK.H            |
| <a href="#">5648</a> | 588 - 600   | 510.6162  | 1528.8268 | 1528.8290 | -1.39   | 0 | 32    | 0.0046  | 1    | U | K.HGFLEEFITPIVK.A               |
| <a href="#">5649</a> | 588 - 600   | 765.4212  | 1528.8279 | 1528.8290 | -0.69   | 0 | 45    | 0.00018 | 1    | U | K.HGFLEEFITPIVK.A               |
| <a href="#">5650</a> | 588 - 600   | 510.6167  | 1528.8282 | 1528.8290 | -0.53   | 0 | 28    | 0.011   | 1    | U | K.HGFLEEFITPIVK.A               |
| <a href="#">5651</a> | 588 - 600   | 765.4214  | 1528.8282 | 1528.8290 | -0.52   | 0 | 70    | 7.8e-07 | 1    | U | K.HGFLEEFITPIVK.A               |
| <a href="#">5652</a> | 588 - 600   | 510.6167  | 1528.8283 | 1528.8290 | -0.43   | 0 | 25    | 0.049   | 1    | U | K.HGFLEEFITPIVK.A               |
| <a href="#">5653</a> | 588 - 600   | 765.4214  | 1528.8283 | 1528.8290 | -0.40   | 0 | 48    | 3e-05   | 1    | U | K.HGFLEEFITPIVK.A               |
| <a href="#">5654</a> | 588 - 600   | 765.4215  | 1528.8285 | 1528.8290 | -0.31   | 0 | 73    | 1.5e-07 | 1    | U | K.HGFLEEFITPIVK.A               |
| <a href="#">5655</a> | 588 - 600   | 510.6168  | 1528.8286 | 1528.8290 | -0.26   | 0 | 42    | 0.0017  | 1    | U | K.HGFLEEFITPIVK.A               |
| <a href="#">5656</a> | 588 - 600   | 765.4216  | 1528.8286 | 1528.8290 | -0.22   | 0 | 58    | 3.5e-06 | 1    | U | K.HGFLEEFITPIVK.A               |
| <a href="#">5657</a> | 588 - 600   | 765.4216  | 1528.8286 | 1528.8290 | -0.22   | 0 | 87    | 2.7e-08 | 1    | U | K.HGFLEEFITPIVK.A               |
| <a href="#">5658</a> | 588 - 600   | 765.4216  | 1528.8286 | 1528.8290 | -0.21   | 0 | 80    | 1.5e-07 | 1    | U | K.HGFLEEFITPIVK.A               |
| <a href="#">5660</a> | 588 - 600   | 510.6169  | 1528.8289 | 1528.8290 | -0.041  | 0 | 33    | 0.0033  | 1    | U | K.HGFLEEFITPIVK.A               |
| <a href="#">5661</a> | 588 - 600   | 510.6169  | 1528.8290 | 1528.8290 | -0.0013 | 0 | 43    | 0.0015  | 1    | U | K.HGFLEEFITPIVK.A               |
| <a href="#">5662</a> | 588 - 600   | 765.4218  | 1528.8290 | 1528.8290 | 0.029   | 0 | 69    | 7.2e-07 | 1    | U | K.HGFLEEFITPIVK.A               |
| <a href="#">5663</a> | 588 - 600   | 765.4218  | 1528.8290 | 1528.8290 | 0.029   | 0 | 69    | 3.4e-07 | 1    | U | K.HGFLEEFITPIVK.A               |
| <a href="#">5664</a> | 588 - 600   | 765.4218  | 1528.8290 | 1528.8290 | 0.042   | 0 | 90    | 6.8e-09 | 1    | U | K.HGFLEEFITPIVK.A               |
| <a href="#">5665</a> | 588 - 600   | 765.4218  | 1528.8291 | 1528.8290 | 0.081   | 0 | 68    | 4.4e-07 | 1    | U | K.HGFLEEFITPIVK.A               |
| <a href="#">5666</a> | 588 - 600   | 510.6170  | 1528.8291 | 1528.8290 | 0.097   | 0 | 47    | 0.00049 | 1    | U | K.HGFLEEFITPIVK.A               |
| <a href="#">5667</a> | 588 - 600   | 510.6170  | 1528.8291 | 1528.8290 | 0.097   | 0 | 46    | 0.00086 | 1    | U | K.HGFLEEFITPIVK.A               |
| <a href="#">5668</a> | 588 - 600   | 510.6170  | 1528.8291 | 1528.8290 | 0.097   | 0 | 40    | 0.0013  | 1    | U | K.HGFLEEFITPIVK.A               |
| <a href="#">5669</a> | 588 - 600   | 765.4218  | 1528.8291 | 1528.8290 | 0.12    | 0 | 70    | 4.3e-07 | 1    | U | K.HGFLEEFITPIVK.A               |
| <a href="#">5670</a> | 588 - 600   | 510.6170  | 1528.8292 | 1528.8290 | 0.18    | 0 | 48    | 0.00044 | 1    | U | K.HGFLEEFITPIVK.A               |
| <a href="#">5671</a> | 588 - 600   | 510.6170  | 1528.8293 | 1528.8290 | 0.19    | 0 | 36    | 0.012   | 1    | U | K.HGFLEEFITPIVK.A               |
| <a href="#">5672</a> | 588 - 600   | 765.4220  | 1528.8294 | 1528.8290 | 0.26    | 0 | 76    | 2.5e-07 | 1    | U | K.HGFLEEFITPIVK.A               |
| <a href="#">5673</a> | 588 - 600   | 765.4220  | 1528.8294 | 1528.8290 | 0.26    | 0 | 54    | 9.3e-06 | 1    | U | K.HGFLEEFITPIVK.A               |
| <a href="#">5674</a> | 588 - 600   | 765.4220  | 1528.8294 | 1528.8290 | 0.29    | 0 | 83    | 1.6e-08 | 1    | U | K.HGFLEEFITPIVK.A               |
| <a href="#">5675</a> | 588 - 600   | 510.6171  | 1528.8294 | 1528.8290 | 0.29    | 0 | 46    | 0.0014  | 1    | U | K.HGFLEEFITPIVK.A               |
| <a href="#">5676</a> | 588 - 600   | 510.6171  | 1528.8294 | 1528.8290 | 0.31    | 0 | 33    | 0.0057  | 1    | U | K.HGFLEEFITPIVK.A               |
| <a href="#">5677</a> | 588 - 600   | 765.4220  | 1528.8295 | 1528.8290 | 0.36    | 0 | 87    | 1.5e-08 | 1    | U | K.HGFLEEFITPIVK.A               |
| <a href="#">5678</a> | 588 - 600   | 765.4222  | 1528.8299 | 1528.8290 | 0.59    | 0 | 71    | 6.9e-07 | 1    | U | K.HGFLEEFITPIVK.A               |
| <a href="#">9328</a> | 604 - 620   | 1080.5162 | 2159.0178 | 2159.0211 | -1.52   | 1 | 126   | 2.3e-11 | 1    | U | K.NKQELSFYSIPEFDEWK.K           |
| <a href="#">9329</a> | 604 - 620   | 720.6813  | 2159.0221 | 2159.0211 | 0.46    | 1 | 26    | 0.045   | 1    | U | K.NKQELSFYSIPEFDEWK.K           |
| <a href="#">9727</a> | 604 - 621   | 763.3795  | 2287.1168 | 2287.1161 | 0.32    | 2 | 41    | 0.00066 | 1    | U | K.NKQELSFYSIPEFDEWKK.H          |
| <a href="#">8477</a> | 606 - 620   | 959.4484  | 1916.8823 | 1916.8832 | -0.46   | 0 | 64    | 1.6e-05 | 1    | U | K.QELSFYSIPEFDEWK.K             |
| <a href="#">8478</a> | 606 - 620   | 959.4486  | 1916.8826 | 1916.8832 | -0.33   | 0 | 60    | 2.9e-05 | 1    | U | K.QELSFYSIPEFDEWK.K             |
| <a href="#">8481</a> | 606 - 620   | 959.4493  | 1916.8840 | 1916.8832 | 0.43    | 0 | 43    | 0.00078 | 1    | U | K.QELSFYSIPEFDEWK.K             |
| <a href="#">8948</a> | 606 - 621   | 1023.4962 | 2044.9779 | 2044.9782 | -0.13   | 1 | 52    | 4.3e-05 | 1    | U | K.QELSFYSIPEFDEWKK.H            |
| <a href="#">8950</a> | 606 - 621   | 682.6668  | 2044.9787 | 2044.9782 | 0.25    | 1 | 36    | 0.0021  | 1    | U | K.QELSFYSIPEFDEWKK.H            |
| <a href="#">1859</a> | 647 - 654   | 530.7239  | 1059.4332 | 1059.4331 | 0.044   | 0 | 16    | 0.04    | 1    | U | K.EYFADMER.H                    |
| <a href="#">1860</a> | 647 - 654   | 530.7239  | 1059.4333 | 1059.4331 | 0.14    | 0 | 15    | 0.039   | 1    | U | K.EYFADMER.H                    |
| <a href="#">1861</a> | 647 - 654   | 530.7242  | 1059.4339 | 1059.4331 | 0.72    | 0 | 32    | 0.006   | 1    | U | K.EYFADMER.H                    |
| <a href="#">1998</a> | 647 - 654   | 538.7210  | 1075.4273 | 1075.4280 | -0.64   | 0 | 30    | 0.0088  | 1    | U | K.EYFADMER.H<br>+ Oxidation (M) |
| <a href="#">1999</a> | 647 - 654   | 538.7213  | 1075.4280 | 1075.4280 | -0.011  | 0 | 33    | 0.013   | 1    | U | K.EYFADMER.H<br>+ Oxidation (M) |
| <a href="#">2001</a> | 647 - 654   | 538.7215  | 1075.4285 | 1075.4280 | 0.44    | 0 | 22    | 0.035   | 1    | U | K.EYFADMER.H<br>+ Oxidation (M) |
| <a href="#">6706</a> | 661 - 676   | 834.9088  | 1667.8030 | 1667.8042 | -0.75   | 0 | 64    | 2.5e-06 | 1    | U | R.YAGPEDDAAITLAFSK.K            |
| <a href="#">6707</a> | 661 - 676   | 834.9088  | 1667.8031 | 1667.8042 | -0.68   | 0 | 80    | 2.1e-07 | 1    | U | R.YAGPEDDAAITLAFSK.K            |
| <a href="#">6708</a> | 661 - 676   | 834.9090  | 1667.8034 | 1667.8042 | -0.51   | 0 | 78    | 7.5e-08 | 1    | U | R.YAGPEDDAAITLAFSK.K            |
| <a href="#">6709</a> | 661 - 676   | 834.9090  | 1667.8035 | 1667.8042 | -0.45   | 0 | 92    | 3.6e-09 | 1    | U | R.YAGPEDDAAITLAFSK.K            |
| <a href="#">6710</a> | 661 - 676   | 834.9091  | 1667.8036 | 1667.8042 | -0.37   | 0 | 90    | 1.4e-08 | 1    | U | R.YAGPEDDAAITLAFSK.K            |
| <a href="#">6711</a> | 661 - 676   | 834.9092  | 1667.8039 | 1667.8042 | -0.21   | 0 | 67    | 2.7e-06 | 1    | U | R.YAGPEDDAAITLAFSK.K            |
| <a href="#">6712</a> | 661 - 676   | 834.9092  | 1667.8039 | 1667.8042 | -0.19   | 0 | 92    | 1.7e-08 | 1    | U | R.YAGPEDDAAITLAFSK.K            |
| <a href="#">6713</a> | 661 - 676   | 834.9093  | 1667.8041 | 1667.8042 | -0.094  | 0 | 71    | 6.3e-07 | 1    | U | R.YAGPEDDAAITLAFSK.K            |
| <a href="#">6714</a> | 661 - 676   | 834.9093  | 1667.8041 | 1667.8042 | -0.082  | 0 | 70    | 7.7e-07 | 1    | U | R.YAGPEDDAAITLAFSK.K            |
| <a href="#">6715</a> | 661 - 676   | 834.9094  | 1667.8042 | 1667.8042 | -0.010  | 0 | 75    | 1e-07   | 1    | U | R.YAGPEDDAAITLAFSK.K            |
| <a href="#">6716</a> | 661 - 676   | 834.9094  | 1667.8043 | 1667.8042 | 0.062   | 0 | 61    | 5e-06   | 1    | U | R.YAGPEDDAAITLAFSK.K            |
| <a href="#">6717</a> | 661 - 676   | 834.9095  | 1667.8044 | 1667.8042 | 0.074   | 0 | 59    | 1.3e-05 | 1    | U | R.YAGPEDDAAITLAFSK.K            |
| <a href="#">6718</a> | 661 - 676   | 834.9095  | 1667.8045 | 1667.8042 | 0.13    | 0 | 73    | 1.6e-07 | 1    | U | R.YAGPEDDAAITLAFSK.K            |
| <a href="#">6720</a> | 661 - 676   | 834.9098  | 1667.8049 | 1667.8042 | 0.42    | 0 | 65    | 3.2e-06 | 1    | U | R.YAGPEDDAAITLAFSK.K            |
| <a href="#">6721</a> | 661 - 676   | 834.9098  | 1667.8051 | 1667.8042 | 0.51    | 0 | 73    | 4.7e-07 | 1    | U | R.YAGPEDDAAITLAFSK.K            |
| <a href="#">6722</a> | 661 - 676   | 834.9099  | 1667.8052 | 1667.8042 | 0.57    | 0 | 47    | 4.4e-05 | 1    | U | R.YAGPEDDAAITLAFSK.K            |
| <a href="#">6723</a> | 661 - 676   | 556.9424  | 1667.8055 | 1667.8042 | 0.73    | 0 | 51    | 0.00028 | 1    | U | R.YAGPEDDAAITLAFSK.K            |
| <a href="#">6724</a> | 661 - 676   | 834.9101  | 1667.8057 | 1667.8042 | 0.87    | 0 | 79    | 8.8e-08 | 1    | U | R.YAGPEDDAAITLAFSK.K            |
| <a href="#">6725</a> | 661 - 676   | 834.9102  | 1667.8059 | 1667.8042 | 1.02    | 0 | 73    | 1.2e-06 | 1    | U | R.YAGPEDDAAITLAFSK.K            |
| <a href="#">5026</a> | 683 - 693   | 490.2345  | 1467.6817 | 1467.6816 | 0.052   | 1 | 27    | 0.016   | 1    | R | KEWLTFMEDR.R                    |
| <a href="#">5149</a> | 683 - 693   | 742.8450  | 1483.6755 | 1483.6765 | -0.71   | 1 | 41    | 0.00016 | 1    | R | KEWLTFMEDR.R<br>+ Oxidation (M) |
| <a href="#">5151</a> | 683 - 693   | 495.5660  | 1483.6761 | 1483.6765 | -0.33   | 1 | 29    | 0.012   | 1    | R | KEWLTFMEDR.R<br>+ Oxidation (M) |
| <a href="#">5152</a> | 683 - 693   | 495.5660  | 1483.6762 | 1483.6765 | -0.21   | 1 | 25    | 0.017   | 1    | R | KEWLTFMEDR.R<br>+ Oxidation (M) |
| <a href="#">5154</a> | 683 - 693   | 742.8455  | 1483.6764 | 1483.6765 | -0.078  | 1 | 43    | 0.00043 | 1    | R | KEWLTFMEDR.R<br>+ Oxidation (M) |
| <a href="#">5158</a> | 683 - 693   | 495.5663  | 1483.6770 | 1483.6765 | 0.30    | 1 | 31    | 0.0024  | 1    | R | KEWLTFMEDR.R<br>+ Oxidation (M) |
| <a href="#">6429</a> | 683 - 694   | 542.2681  | 1623.7824 | 1623.7827 | -0.20   | 2 | 31    | 0.019   | 1    | R | KEWLTFMEDRR.Q                   |
| <a href="#">4120</a> | 684 - 693   | 670.7978  | 1339.5811 | 1339.5867 | -4.17   | 0 | 35    | 0.0006  | 1    | K | EWLTFMEDR.R                     |
| <a href="#">4121</a> | 684 - 693   | 670.8006  | 1339.5867 | 1339.5867 | -0.013  | 0 | 50    | 0.00021 | 1    | K | EWLTFMEDR.R                     |
| <a href="#">4204</a> | 684 - 693   | 678.7978  | 1355.5811 | 1355.5816 | -0.37   | 0 | 21    | 0.018   | 1    | K | EWLTFMEDR.R<br>+ Oxidation (M)  |
| <a href="#">4205</a> | 684 - 693   | 678.7979  | 1355.5813 | 1355.5816 | -0.19   | 0 | 26    | 0.043   | 1    | K | EWLTFMEDR.R<br>+ Oxidation (M)  |
| <a href="#">7962</a> | 697 - 712   | 610.9992  | 1829.9759 | 1829.9788 | -1.61   | 1 | 29    | 0.0054  | 1    | U | R.RLHGLPEQFLYGTATK.H            |
| <a href="#">7963</a> | 697 - 712   | 610.9996  | 1829.9769 | 1829.9788 | -1.02   | 1 | 39    | 0.00086 | 1    | U | R.RLHGLPEQFLYGTATK.H            |
| <a href="#">7964</a> | 697 - 712   | 610.9998  | 1829.9775 | 1829.9788 | -0.74   | 1 | 25    | 0.039   | 1    | U | R.RLHGLPEQFLYGTATK.H            |
| <a href="#">7966</a> | 697 - 712   | 611.0000  | 1829.9783 | 1829.9788 | -0.30   | 1 | 29    | 0.0034  | 1    | U | R.RLHGLPEQFLYGTATK.H            |
| <a href="#">7967</a> | 697 - 712   | 611.0000  | 1829.9783 | 1829.9788 | -0.30   | 1 | 56    | 2.9e-05 | 1    | U | R.RLHGLPEQFLYGTATK.H            |
| <a href="#">7968</a> | 697 - 712   | 915.9965  | 1829.9784 | 1829.9788 | -0.21   | 1 | 83    | 1.5e-08 | 1    | U | R.RLHGLPEQFLYGTATK.H            |



| Query                | Start - End | Observed | Mr (expt) | Mr (calc) | ppm    | M | Score | Expect  | Rank | U | Peptide              |
|----------------------|-------------|----------|-----------|-----------|--------|---|-------|---------|------|---|----------------------|
| <a href="#">7969</a> | 697 - 712   | 611.0001 | 1829.9785 | 1829.9788 | -0.18  | 1 | 21    | 0.011   | 1    | U | R.RLHGLPEQFLYGTATK.H |
| <a href="#">7970</a> | 697 - 712   | 611.0003 | 1829.9791 | 1829.9788 | 0.15   | 1 | 46    | 0.00049 | 1    | U | R.RLHGLPEQFLYGTATK.H |
| <a href="#">7972</a> | 697 - 712   | 611.0004 | 1829.9793 | 1829.9788 | 0.29   | 1 | 54    | 0.00014 | 1    | U | R.RLHGLPEQFLYGTATK.H |
| <a href="#">7973</a> | 697 - 712   | 458.5021 | 1829.9794 | 1829.9788 | 0.31   | 1 | 49    | 0.00034 | 1    | U | R.RLHGLPEQFLYGTATK.H |
| <a href="#">7976</a> | 697 - 712   | 611.0006 | 1829.9798 | 1829.9788 | 0.56   | 1 | 32    | 0.0061  | 1    | U | R.RLHGLPEQFLYGTATK.H |
| <a href="#">7977</a> | 697 - 712   | 611.0006 | 1829.9801 | 1829.9788 | 0.72   | 1 | 28    | 0.012   | 1    | U | R.RLHGLPEQFLYGTATK.H |
| <a href="#">6759</a> | 698 - 712   | 837.9450 | 1673.8755 | 1673.8777 | -1.30  | 0 | 21    | 0.012   | 1    | U | R.LHGLPEQFLYGTATK.H  |
| <a href="#">6760</a> | 698 - 712   | 837.9452 | 1673.8759 | 1673.8777 | -1.08  | 0 | 74    | 1.9e-07 | 1    | U | R.LHGLPEQFLYGTATK.H  |
| <a href="#">6761</a> | 698 - 712   | 558.9660 | 1673.8763 | 1673.8777 | -0.84  | 0 | 39    | 0.0015  | 1    | U | R.LHGLPEQFLYGTATK.H  |
| <a href="#">6762</a> | 698 - 712   | 558.9661 | 1673.8764 | 1673.8777 | -0.81  | 0 | 24    | 0.017   | 1    | U | R.LHGLPEQFLYGTATK.H  |
| <a href="#">6763</a> | 698 - 712   | 837.9455 | 1673.8765 | 1673.8777 | -0.72  | 0 | 29    | 0.0018  | 1    | U | R.LHGLPEQFLYGTATK.H  |
| <a href="#">6764</a> | 698 - 712   | 837.9456 | 1673.8767 | 1673.8777 | -0.58  | 0 | 33    | 0.00087 | 1    | U | R.LHGLPEQFLYGTATK.H  |
| <a href="#">6765</a> | 698 - 712   | 558.9662 | 1673.8769 | 1673.8777 | -0.48  | 0 | 44    | 0.00096 | 1    | U | R.LHGLPEQFLYGTATK.H  |
| <a href="#">6766</a> | 698 - 712   | 837.9459 | 1673.8772 | 1673.8777 | -0.29  | 0 | 33    | 0.002   | 1    | U | R.LHGLPEQFLYGTATK.H  |
| <a href="#">6768</a> | 698 - 712   | 837.9460 | 1673.8774 | 1673.8777 | -0.15  | 0 | 37    | 0.00036 | 1    | U | R.LHGLPEQFLYGTATK.H  |
| <a href="#">6770</a> | 698 - 712   | 558.9664 | 1673.8775 | 1673.8777 | -0.11  | 0 | 26    | 0.026   | 1    | U | R.LHGLPEQFLYGTATK.H  |
| <a href="#">6771</a> | 698 - 712   | 558.9665 | 1673.8776 | 1673.8777 | -0.089 | 0 | 34    | 0.00093 | 1    | U | R.LHGLPEQFLYGTATK.H  |
| <a href="#">6772</a> | 698 - 712   | 837.9461 | 1673.8776 | 1673.8777 | -0.079 | 0 | 33    | 0.00085 | 1    | U | R.LHGLPEQFLYGTATK.H  |
| <a href="#">6773</a> | 698 - 712   | 558.9665 | 1673.8776 | 1673.8777 | -0.071 | 0 | 30    | 0.0076  | 1    | U | R.LHGLPEQFLYGTATK.H  |
| <a href="#">6774</a> | 698 - 712   | 837.9461 | 1673.8776 | 1673.8777 | -0.032 | 0 | 25    | 0.0065  | 1    | U | R.LHGLPEQFLYGTATK.H  |
| <a href="#">6775</a> | 698 - 712   | 558.9665 | 1673.8778 | 1673.8777 | 0.036  | 0 | 32    | 0.0035  | 1    | U | R.LHGLPEQFLYGTATK.H  |
| <a href="#">6776</a> | 698 - 712   | 837.9462 | 1673.8779 | 1673.8777 | 0.11   | 0 | 54    | 9.1e-06 | 1    | U | R.LHGLPEQFLYGTATK.H  |
| <a href="#">6777</a> | 698 - 712   | 558.9666 | 1673.8779 | 1673.8777 | 0.13   | 0 | 23    | 0.035   | 1    | U | R.LHGLPEQFLYGTATK.H  |
| <a href="#">6778</a> | 698 - 712   | 419.4768 | 1673.8779 | 1673.8777 | 0.14   | 0 | 39    | 0.0084  | 1    | U | R.LHGLPEQFLYGTATK.H  |
| <a href="#">6779</a> | 698 - 712   | 837.9462 | 1673.8779 | 1673.8777 | 0.15   | 0 | 30    | 0.0023  | 1    | U | R.LHGLPEQFLYGTATK.H  |
| <a href="#">6780</a> | 698 - 712   | 558.9666 | 1673.8781 | 1673.8777 | 0.22   | 0 | 38    | 0.0045  | 1    | U | R.LHGLPEQFLYGTATK.H  |
| <a href="#">6781</a> | 698 - 712   | 558.9666 | 1673.8781 | 1673.8777 | 0.23   | 0 | 38    | 0.0032  | 1    | U | R.LHGLPEQFLYGTATK.H  |
| <a href="#">6782</a> | 698 - 712   | 558.9666 | 1673.8781 | 1673.8777 | 0.25   | 0 | 31    | 0.0062  | 1    | U | R.LHGLPEQFLYGTATK.H  |
| <a href="#">6783</a> | 698 - 712   | 837.9464 | 1673.8782 | 1673.8777 | 0.28   | 0 | 66    | 7.9e-07 | 1    | U | R.LHGLPEQFLYGTATK.H  |
| <a href="#">6784</a> | 698 - 712   | 558.9667 | 1673.8782 | 1673.8777 | 0.31   | 0 | 38    | 0.0055  | 1    | U | R.LHGLPEQFLYGTATK.H  |
| <a href="#">6785</a> | 698 - 712   | 558.9668 | 1673.8785 | 1673.8777 | 0.45   | 0 | 26    | 0.027   | 1    | U | R.LHGLPEQFLYGTATK.H  |
| <a href="#">6786</a> | 698 - 712   | 558.9668 | 1673.8785 | 1673.8777 | 0.48   | 0 | 30    | 0.022   | 1    | U | R.LHGLPEQFLYGTATK.H  |
| <a href="#">6788</a> | 698 - 712   | 558.9669 | 1673.8788 | 1673.8777 | 0.68   | 0 | 38    | 0.0029  | 1    | U | R.LHGLPEQFLYGTATK.H  |
| <a href="#">6790</a> | 698 - 712   | 837.9469 | 1673.8793 | 1673.8777 | 0.95   | 0 | 20    | 0.012   | 1    | U | R.LHGLPEQFLYGTATK.H  |
| <a href="#">6792</a> | 698 - 712   | 837.9470 | 1673.8795 | 1673.8777 | 1.10   | 0 | 23    | 0.0076  | 1    | U | R.LHGLPEQFLYGTATK.H  |
| <a href="#">6793</a> | 698 - 712   | 558.9672 | 1673.8797 | 1673.8777 | 1.20   | 0 | 48    | 0.00078 | 1    | U | R.LHGLPEQFLYGTATK.H  |
| <a href="#">6794</a> | 698 - 712   | 558.9674 | 1673.8805 | 1673.8777 | 1.67   | 0 | 26    | 0.028   | 1    | U | R.LHGLPEQFLYGTATK.H  |
| <a href="#">3510</a> | 713 - 722   | 632.8191 | 1263.6237 | 1263.6248 | -0.84  | 0 | 24    | 0.011   | 1    | U | K.HLTYNDFINK.E       |
| <a href="#">3511</a> | 713 - 722   | 632.8192 | 1263.6239 | 1263.6248 | -0.67  | 0 | 16    | 0.034   | 1    | U | K.HLTYNDFINK.E       |
| <a href="#">3512</a> | 713 - 722   | 632.8193 | 1263.6240 | 1263.6248 | -0.64  | 0 | 39    | 0.0032  | 1    | U | K.HLTYNDFINK.E       |
| <a href="#">3513</a> | 713 - 722   | 632.8193 | 1263.6240 | 1263.6248 | -0.59  | 0 | 36    | 0.0012  | 1    | U | K.HLTYNDFINK.E       |
| <a href="#">3515</a> | 713 - 722   | 632.8194 | 1263.6243 | 1263.6248 | -0.38  | 0 | 35    | 0.0013  | 1    | U | K.HLTYNDFINK.E       |
| <a href="#">3516</a> | 713 - 722   | 632.8194 | 1263.6243 | 1263.6248 | -0.37  | 0 | 34    | 0.0015  | 1    | U | K.HLTYNDFINK.E       |
| <a href="#">3517</a> | 713 - 722   | 632.8194 | 1263.6243 | 1263.6248 | -0.37  | 0 | 27    | 0.0059  | 1    | U | K.HLTYNDFINK.E       |
| <a href="#">3518</a> | 713 - 722   | 632.8196 | 1263.6245 | 1263.6248 | -0.18  | 0 | 33    | 0.0019  | 1    | U | K.HLTYNDFINK.E       |
| <a href="#">3520</a> | 713 - 722   | 632.8196 | 1263.6246 | 1263.6248 | -0.11  | 0 | 40    | 0.0023  | 1    | U | K.HLTYNDFINK.E       |
| <a href="#">3521</a> | 713 - 722   | 632.8196 | 1263.6246 | 1263.6248 | -0.097 | 0 | 36    | 0.018   | 1    | U | K.HLTYNDFINK.E       |
| <a href="#">3522</a> | 713 - 722   | 632.8197 | 1263.6248 | 1263.6248 | 0.013  | 0 | 44    | 0.00044 | 1    | U | K.HLTYNDFINK.E       |
| <a href="#">3523</a> | 713 - 722   | 632.8197 | 1263.6248 | 1263.6248 | 0.029  | 0 | 34    | 0.0016  | 1    | U | K.HLTYNDFINK.E       |
| <a href="#">3524</a> | 713 - 722   | 632.8197 | 1263.6248 | 1263.6248 | 0.029  | 0 | 24    | 0.012   | 1    | U | K.HLTYNDFINK.E       |
| <a href="#">3525</a> | 713 - 722   | 632.8197 | 1263.6248 | 1263.6248 | 0.045  | 0 | 23    | 0.026   | 1    | U | K.HLTYNDFINK.E       |
| <a href="#">3527</a> | 713 - 722   | 632.8197 | 1263.6249 | 1263.6248 | 0.11   | 0 | 16    | 0.033   | 1    | U | K.HLTYNDFINK.E       |
| <a href="#">3528</a> | 713 - 722   | 632.8197 | 1263.6249 | 1263.6248 | 0.11   | 0 | 24    | 0.028   | 1    | U | K.HLTYNDFINK.E       |
| <a href="#">3529</a> | 713 - 722   | 632.8197 | 1263.6249 | 1263.6248 | 0.12   | 0 | 26    | 0.011   | 1    | U | K.HLTYNDFINK.E       |
| <a href="#">3530</a> | 713 - 722   | 632.8198 | 1263.6250 | 1263.6248 | 0.16   | 0 | 34    | 0.0013  | 1    | U | K.HLTYNDFINK.E       |
| <a href="#">3531</a> | 713 - 722   | 422.2156 | 1263.6250 | 1263.6248 | 0.18   | 0 | 36    | 0.0025  | 1    | U | K.HLTYNDFINK.E       |
| <a href="#">3532</a> | 713 - 722   | 422.2157 | 1263.6253 | 1263.6248 | 0.42   | 0 | 21    | 0.039   | 1    | U | K.HLTYNDFINK.E       |
| <a href="#">3533</a> | 713 - 722   | 422.2157 | 1263.6253 | 1263.6248 | 0.42   | 0 | 27    | 0.013   | 1    | U | K.HLTYNDFINK.E       |
| <a href="#">3534</a> | 713 - 722   | 632.8199 | 1263.6253 | 1263.6248 | 0.42   | 0 | 30    | 0.013   | 1    | U | K.HLTYNDFINK.E       |
| <a href="#">3535</a> | 713 - 722   | 632.8200 | 1263.6254 | 1263.6248 | 0.50   | 0 | 39    | 0.0021  | 1    | U | K.HLTYNDFINK.E       |
| <a href="#">3536</a> | 713 - 722   | 632.8200 | 1263.6255 | 1263.6248 | 0.58   | 0 | 31    | 0.0018  | 1    | U | K.HLTYNDFINK.E       |
| <a href="#">3537</a> | 713 - 722   | 632.8200 | 1263.6255 | 1263.6248 | 0.60   | 0 | 25    | 0.019   | 1    | U | K.HLTYNDFINK.E       |
| <a href="#">3539</a> | 713 - 722   | 632.8202 | 1263.6258 | 1263.6248 | 0.80   | 0 | 28    | 0.013   | 1    | U | K.HLTYNDFINK.E       |
| <a href="#">3540</a> | 713 - 722   | 632.8204 | 1263.6262 | 1263.6248 | 1.17   | 0 | 30    | 0.028   | 1    | U | K.HLTYNDFINK.E       |
| <a href="#">4733</a> | 723 - 734   | 718.8534 | 1435.6923 | 1435.6943 | -1.39  | 0 | 32    | 0.0027  | 1    | K | ELILFNSDNER.S        |
| <a href="#">4734</a> | 723 - 734   | 718.8537 | 1435.6929 | 1435.6943 | -0.96  | 0 | 45    | 0.003   | 1    | K | ELILFNSDNER.S        |
| <a href="#">4735</a> | 723 - 734   | 718.8538 | 1435.6931 | 1435.6943 | -0.80  | 0 | 36    | 0.0052  | 1    | K | ELILFNSDNER.S        |
| <a href="#">4736</a> | 723 - 734   | 718.8540 | 1435.6935 | 1435.6943 | -0.53  | 0 | 40    | 0.0009  | 1    | K | ELILFNSDNER.S        |
| <a href="#">4737</a> | 723 - 734   | 718.8540 | 1435.6935 | 1435.6943 | -0.53  | 0 | 52    | 5e-05   | 1    | K | ELILFNSDNER.S        |
| <a href="#">4739</a> | 723 - 734   | 718.8541 | 1435.6936 | 1435.6943 | -0.46  | 0 | 32    | 0.0019  | 1    | K | ELILFNSDNER.S        |
| <a href="#">4740</a> | 723 - 734   | 718.8541 | 1435.6936 | 1435.6943 | -0.45  | 0 | 47    | 0.00046 | 1    | K | ELILFNSDNER.S        |
| <a href="#">4741</a> | 723 - 734   | 718.8542 | 1435.6937 | 1435.6943 | -0.38  | 0 | 28    | 0.008   | 1    | K | ELILFNSDNER.S        |
| <a href="#">4742</a> | 723 - 734   | 718.8542 | 1435.6939 | 1435.6943 | -0.29  | 0 | 24    | 0.0079  | 1    | K | ELILFNSDNER.S        |
| <a href="#">4743</a> | 723 - 734   | 718.8543 | 1435.6940 | 1435.6943 | -0.20  | 0 | 52    | 9.1e-05 | 1    | K | ELILFNSDNER.S        |
| <a href="#">4744</a> | 723 - 734   | 718.8544 | 1435.6942 | 1435.6943 | -0.085 | 0 | 36    | 0.0054  | 1    | K | ELILFNSDNER.S        |
| <a href="#">4746</a> | 723 - 734   | 718.8544 | 1435.6942 | 1435.6943 | -0.029 | 0 | 39    | 0.0042  | 1    | K | ELILFNSDNER.S        |
| <a href="#">4747</a> | 723 - 734   | 718.8544 | 1435.6942 | 1435.6943 | -0.029 | 0 | 29    | 0.04    | 1    | K | ELILFNSDNER.S        |
| <a href="#">4748</a> | 723 - 734   | 718.8544 | 1435.6943 | 1435.6943 | 0.040  | 0 | 40    | 0.0025  | 1    | K | ELILFNSDNER.S        |
| <a href="#">4749</a> | 723 - 734   | 718.8545 | 1435.6944 | 1435.6943 | 0.068  | 0 | 37    | 0.0059  | 1    | K | ELILFNSDNER.S        |
| <a href="#">4750</a> | 723 - 734   | 718.8546 | 1435.6946 | 1435.6943 | 0.19   | 0 | 31    | 0.023   | 1    | K | ELILFNSDNER.S        |
| <a href="#">4751</a> | 723 - 734   | 718.8546 | 1435.6946 | 1435.6943 | 0.21   | 0 | 31    | 0.019   | 1    | K | ELILFNSDNER.S        |
| <a href="#">4752</a> | 723 - 734   | 718.8547 | 1435.6949 | 1435.6943 | 0.40   | 0 | 34    | 0.037   | 1    | K | ELILFNSDNER.S        |
| <a href="#">4753</a> | 723 - 734   | 718.8549 | 1435.6952 | 1435.6943 | 0.64   | 0 | 47    | 0.00099 | 1    | K | ELILFNSDNER.S        |
| <a href="#">4754</a> | 723 - 734   | 718.8549 | 1435.6953 | 1435.6943 | 0.72   | 0 | 24    | 0.035   | 1    | K | ELILFNSDNER.S        |
| <a href="#">4755</a> | 723 - 734   | 718.8550 | 1435.6955 | 1435.6943 | 0.82   | 0 | 30    | 0.028   | 1    | K | ELILFNSDNER.S        |
| <a href="#">4756</a> | 723 - 734   | 718.8553 | 1435.6961 | 1435.6943 | 1.28   | 0 | 36    | 0.0089  | 1    | K | ELILFNSDNER.S        |
| <a href="#">4757</a> | 723 - 734   | 718.8554 | 1435.6962 | 1435.6943 | 1.34   | 0 | 44    | 0.00047 | 1    | K | ELILFNSDNER.S        |
| <a href="#">4758</a> | 723 - 734   | 718.8554 | 1435.6963 | 1435.6943 | 1.41   | 0 | 27    | 0.0076  | 1    | K | ELILFNSDNER.S        |
| <a href="#">5301</a> | 735 - 748   | 750.9107 | 1499.8069 | 1499.8096 | -1.82  | 0 | 40    | 0.0002  | 1    | U | R.SIPSLVDGFKPGQR.K   |
| <a href="#">5302</a> | 735 - 748   | 750.9110 | 1499.8073 | 1499.8096 | -1.52  | 0 | 39    | 0.0014  | 1    | U | R.SIPSLVDGFKPGQR.K   |
| <a href="#">5304</a> | 735 - 748   | 750.9115 | 1499.8084 | 1499.8096 | -0.84  | 0 | 15    | 0.043   | 1    | U | R.SIPSLVDGFKPGQR.K   |
| <a href="#">5316</a> | 735 - 748   | 750.9121 | 1499.8097 | 1499.8096 | 0.065  | 0 | 54    | 8.2e-05 | 1    | U | R.SIPSLVDGFKPGQR.K   |
| <a href="#">5319</a> | 735 - 748   | 750.9123 | 1499.8101 | 1499.8096 | 0.30   | 0 | 32    | 0.0016  | 1    | U | R.SIPSLVDGFKPGQR.K   |

| Query                 | Start - End | Observed  | Mr (expt) | Mr (calc) | ppm     | M | Score | Expect  | Rank | U | Peptide                                 |
|-----------------------|-------------|-----------|-----------|-----------|---------|---|-------|---------|------|---|-----------------------------------------|
| <a href="#">5324</a>  | 735 - 748   | 750.9130  | 1499.8114 | 1499.8096 | 1.17    | 0 | 14    | 0.045   | 1    | U | R.SIPSLVDGFKPGQR.K                      |
| <a href="#">5325</a>  | 735 - 748   | 750.9130  | 1499.8115 | 1499.8096 | 1.28    | 0 | 46    | 5.1e-05 | 1    | U | R.SIPSLVDGFKPGQR.K                      |
| <a href="#">3938</a>  | 826 - 836   | 658.3564  | 1314.6983 | 1314.7006 | -1.76   | 0 | 33    | 0.0068  | 1    | U | R.YIFTMLSTLAR.L                         |
| <a href="#">3939</a>  | 826 - 836   | 658.3574  | 1314.7002 | 1314.7006 | -0.27   | 0 | 38    | 0.00032 | 1    | U | R.YIFTMLSTLAR.L                         |
| <a href="#">3940</a>  | 826 - 836   | 658.3576  | 1314.7006 | 1314.7006 | -0.0068 | 0 | 35    | 0.0011  | 1    | U | R.YIFTMLSTLAR.L                         |
| <a href="#">3941</a>  | 826 - 836   | 658.3576  | 1314.7006 | 1314.7006 | 0.024   | 0 | 50    | 7.4e-05 | 1    | U | R.YIFTMLSTLAR.L                         |
| <a href="#">3942</a>  | 826 - 836   | 658.3576  | 1314.7007 | 1314.7006 | 0.100   | 0 | 32    | 0.0081  | 1    | U | R.YIFTMLSTLAR.L                         |
| <a href="#">3943</a>  | 826 - 836   | 658.3576  | 1314.7007 | 1314.7006 | 0.100   | 0 | 46    | 0.00023 | 1    | U | R.YIFTMLSTLAR.L                         |
| <a href="#">3944</a>  | 826 - 836   | 658.3576  | 1314.7007 | 1314.7006 | 0.11    | 0 | 49    | 0.00013 | 1    | U | R.YIFTMLSTLAR.L                         |
| <a href="#">3945</a>  | 826 - 836   | 658.3577  | 1314.7008 | 1314.7006 | 0.21    | 0 | 43    | 0.00032 | 1    | U | R.YIFTMLSTLAR.L                         |
| <a href="#">3946</a>  | 826 - 836   | 658.3577  | 1314.7008 | 1314.7006 | 0.21    | 0 | 45    | 0.00013 | 1    | U | R.YIFTMLSTLAR.L                         |
| <a href="#">3947</a>  | 826 - 836   | 658.3578  | 1314.7011 | 1314.7006 | 0.39    | 0 | 38    | 0.00069 | 1    | U | R.YIFTMLSTLAR.L                         |
| <a href="#">3948</a>  | 826 - 836   | 658.3579  | 1314.7013 | 1314.7006 | 0.54    | 0 | 46    | 0.00013 | 1    | U | R.YIFTMLSTLAR.L                         |
| <a href="#">3949</a>  | 826 - 836   | 658.3580  | 1314.7013 | 1314.7006 | 0.59    | 0 | 38    | 0.0016  | 1    | U | R.YIFTMLSTLAR.L                         |
| <a href="#">4057</a>  | 826 - 836   | 666.3548  | 1330.6951 | 1330.6955 | -0.31   | 0 | 32    | 0.0015  | 1    | U | R.YIFTMLSTLAR.L<br>+ Oxidation (M)      |
| <a href="#">4058</a>  | 826 - 836   | 666.3548  | 1330.6951 | 1330.6955 | -0.29   | 0 | 32    | 0.0024  | 1    | U | R.YIFTMLSTLAR.L<br>+ Oxidation (M)      |
| <a href="#">4059</a>  | 826 - 836   | 666.3549  | 1330.6952 | 1330.6955 | -0.22   | 0 | 55    | 3.6e-05 | 1    | U | R.YIFTMLSTLAR.L<br>+ Oxidation (M)      |
| <a href="#">4060</a>  | 826 - 836   | 666.3550  | 1330.6953 | 1330.6955 | -0.11   | 0 | 53    | 3.8e-05 | 1    | U | R.YIFTMLSTLAR.L<br>+ Oxidation (M)      |
| <a href="#">4061</a>  | 826 - 836   | 666.3550  | 1330.6953 | 1330.6955 | -0.11   | 0 | 51    | 6e-05   | 1    | U | R.YIFTMLSTLAR.L<br>+ Oxidation (M)      |
| <a href="#">4062</a>  | 826 - 836   | 666.3551  | 1330.6956 | 1330.6955 | 0.069   | 0 | 53    | 4.4e-05 | 1    | U | R.YIFTMLSTLAR.L<br>+ Oxidation (M)      |
| <a href="#">4063</a>  | 826 - 836   | 666.3551  | 1330.6956 | 1330.6955 | 0.084   | 0 | 56    | 2.1e-05 | 1    | U | R.YIFTMLSTLAR.L<br>+ Oxidation (M)      |
| <a href="#">4064</a>  | 826 - 836   | 666.3552  | 1330.6958 | 1330.6955 | 0.22    | 0 | 50    | 9.4e-05 | 1    | U | R.YIFTMLSTLAR.L<br>+ Oxidation (M)      |
| <a href="#">4066</a>  | 826 - 836   | 666.3553  | 1330.6961 | 1330.6955 | 0.46    | 0 | 24    | 0.0064  | 1    | U | R.YIFTMLSTLAR.L<br>+ Oxidation (M)      |
| <a href="#">4067</a>  | 826 - 836   | 666.3554  | 1330.6962 | 1330.6955 | 0.54    | 0 | 54    | 3.5e-05 | 1    | U | R.YIFTMLSTLAR.L<br>+ Oxidation (M)      |
| <a href="#">4068</a>  | 826 - 836   | 666.3555  | 1330.6965 | 1330.6955 | 0.75    | 0 | 23    | 0.036   | 1    | U | R.YIFTMLSTLAR.L<br>+ Oxidation (M)      |
| <a href="#">4069</a>  | 826 - 836   | 666.3556  | 1330.6966 | 1330.6955 | 0.81    | 0 | 25    | 0.005   | 1    | U | R.YIFTMLSTLAR.L<br>+ Oxidation (M)      |
| <a href="#">4231</a>  | 837 - 848   | 679.3887  | 1356.7628 | 1356.7653 | -1.84   | 0 | 31    | 0.0068  | 1    | U | R.LLFPVDDNLLK.F                         |
| <a href="#">4233</a>  | 837 - 848   | 679.3896  | 1356.7647 | 1356.7653 | -0.46   | 0 | 22    | 0.037   | 1    | U | R.LLFPVDDNLLK.F                         |
| <a href="#">4235</a>  | 837 - 848   | 679.3897  | 1356.7649 | 1356.7653 | -0.30   | 0 | 40    | 0.0014  | 1    | U | R.LLFPVDDNLLK.F                         |
| <a href="#">4236</a>  | 837 - 848   | 679.3898  | 1356.7649 | 1356.7653 | -0.25   | 0 | 35    | 0.005   | 1    | U | R.LLFPVDDNLLK.F                         |
| <a href="#">4237</a>  | 837 - 848   | 679.3898  | 1356.7651 | 1356.7653 | -0.16   | 0 | 47    | 0.00024 | 1    | U | R.LLFPVDDNLLK.F                         |
| <a href="#">4238</a>  | 837 - 848   | 679.3898  | 1356.7651 | 1356.7653 | -0.16   | 0 | 50    | 0.00021 | 1    | U | R.LLFPVDDNLLK.F                         |
| <a href="#">4239</a>  | 837 - 848   | 679.3898  | 1356.7651 | 1356.7653 | -0.13   | 0 | 32    | 0.0028  | 1    | U | R.LLFPVDDNLLK.F                         |
| <a href="#">4240</a>  | 837 - 848   | 679.3899  | 1356.7652 | 1356.7653 | -0.089  | 0 | 31    | 0.024   | 1    | U | R.LLFPVDDNLLK.F                         |
| <a href="#">4242</a>  | 837 - 848   | 679.3899  | 1356.7653 | 1356.7653 | 0.014   | 0 | 48    | 0.00017 | 1    | U | R.LLFPVDDNLLK.F                         |
| <a href="#">4243</a>  | 837 - 848   | 679.3899  | 1356.7653 | 1356.7653 | 0.014   | 0 | 32    | 0.0025  | 1    | U | R.LLFPVDDNLLK.F                         |
| <a href="#">4244</a>  | 837 - 848   | 679.3900  | 1356.7653 | 1356.7653 | 0.043   | 0 | 32    | 0.0035  | 1    | U | R.LLFPVDDNLLK.F                         |
| <a href="#">4245</a>  | 837 - 848   | 679.3900  | 1356.7654 | 1356.7653 | 0.073   | 0 | 30    | 0.028   | 1    | U | R.LLFPVDDNLLK.F                         |
| <a href="#">4246</a>  | 837 - 848   | 679.3900  | 1356.7654 | 1356.7653 | 0.088   | 0 | 25    | 0.045   | 1    | U | R.LLFPVDDNLLK.F                         |
| <a href="#">4247</a>  | 837 - 848   | 679.3900  | 1356.7654 | 1356.7653 | 0.088   | 0 | 43    | 0.001   | 1    | U | R.LLFPVDDNLLK.F                         |
| <a href="#">4248</a>  | 837 - 848   | 679.3900  | 1356.7655 | 1356.7653 | 0.16    | 0 | 16    | 0.036   | 1    | U | R.LLFPVDDNLLK.F                         |
| <a href="#">4249</a>  | 837 - 848   | 679.3900  | 1356.7655 | 1356.7653 | 0.18    | 0 | 26    | 0.0047  | 1    | U | R.LLFPVDDNLLK.F                         |
| <a href="#">4250</a>  | 837 - 848   | 679.3901  | 1356.7656 | 1356.7653 | 0.26    | 0 | 43    | 0.0016  | 1    | U | R.LLFPVDDNLLK.F                         |
| <a href="#">4251</a>  | 837 - 848   | 679.3901  | 1356.7657 | 1356.7653 | 0.28    | 0 | 63    | 1.2e-05 | 1    | U | R.LLFPVDDNLLK.F                         |
| <a href="#">4252</a>  | 837 - 848   | 679.3901  | 1356.7657 | 1356.7653 | 0.28    | 0 | 43    | 0.00068 | 1    | U | R.LLFPVDDNLLK.F                         |
| <a href="#">4253</a>  | 837 - 848   | 679.3902  | 1356.7657 | 1356.7653 | 0.34    | 0 | 28    | 0.013   | 1    | U | R.LLFPVDDNLLK.F                         |
| <a href="#">4255</a>  | 837 - 848   | 679.3902  | 1356.7658 | 1356.7653 | 0.35    | 0 | 33    | 0.021   | 1    | U | R.LLFPVDDNLLK.F                         |
| <a href="#">1938</a>  | 849 - 856   | 535.7487  | 1069.4828 | 1069.4829 | -0.034  | 0 | 35    | 0.015   | 1    | K | FLYDDNQ.R.V                             |
| <a href="#">1940</a>  | 849 - 856   | 535.7488  | 1069.4830 | 1069.4829 | 0.15    | 0 | 27    | 0.034   | 1    | K | FLYDDNQ.R.V                             |
| <a href="#">579</a>   | 885 - 891   | 424.7167  | 847.4188  | 847.4188  | 0.065   | 0 | 39    | 0.0048  | 1    | U | K.LPNYDAR.E                             |
| <a href="#">580</a>   | 885 - 891   | 424.7167  | 847.4189  | 847.4188  | 0.089   | 0 | 27    | 0.019   | 1    | U | K.LPNYDAR.E                             |
| <a href="#">7285</a>  | 900 - 914   | 870.9250  | 1739.8354 | 1739.8375 | -1.21   | 0 | 26    | 0.011   | 1    | U | R.MLDGLDHPMLPNYK.N                      |
| <a href="#">7286</a>  | 900 - 914   | 580.9528  | 1739.8365 | 1739.8375 | -0.57   | 0 | 32    | 0.047   | 1    | U | R.MLDGLDHPMLPNYK.N                      |
| <a href="#">7287</a>  | 900 - 914   | 870.9260  | 1739.8374 | 1739.8375 | -0.041  | 0 | 57    | 4.2e-05 | 1    | U | R.MLDGLDHPMLPNYK.N                      |
| <a href="#">7288</a>  | 900 - 914   | 870.9261  | 1739.8377 | 1739.8375 | 0.12    | 0 | 39    | 0.0026  | 1    | U | R.MLDGLDHPMLPNYK.N                      |
| <a href="#">7397</a>  | 900 - 914   | 878.9225  | 1755.8304 | 1755.8324 | -1.16   | 0 | 35    | 0.012   | 1    | U | R.MLDGLDHPMLPNYK.N<br>+ Oxidation (M)   |
| <a href="#">7401</a>  | 900 - 914   | 878.9233  | 1755.8321 | 1755.8324 | -0.19   | 0 | 58    | 2.1e-05 | 1    | U | R.MLDGLDHPMLPNYK.N<br>+ Oxidation (M)   |
| <a href="#">7506</a>  | 900 - 914   | 886.9205  | 1771.8265 | 1771.8273 | -0.44   | 0 | 26    | 0.0093  | 1    | U | R.MLDGLDHPMLPNYK.N<br>+ 2 Oxidation (M) |
| <a href="#">7507</a>  | 900 - 914   | 591.6163  | 1771.8271 | 1771.8273 | -0.14   | 0 | 34    | 0.011   | 1    | U | R.MLDGLDHPMLPNYK.N<br>+ 2 Oxidation (M) |
| <a href="#">7511</a>  | 900 - 914   | 886.9212  | 1771.8279 | 1771.8273 | 0.35    | 0 | 46    | 0.00018 | 1    | U | R.MLDGLDHPMLPNYK.N<br>+ 2 Oxidation (M) |
| <a href="#">7513</a>  | 900 - 914   | 886.9214  | 1771.8282 | 1771.8273 | 0.48    | 0 | 28    | 0.005   | 1    | U | R.MLDGLDHPMLPNYK.N<br>+ 2 Oxidation (M) |
| <a href="#">9990</a>  | 918 - 939   | 1212.1116 | 2422.2087 | 2422.2129 | -1.70   | 0 | 88    | 1.1e-07 | 1    | U | K.GTIQELGQNQYAVSGEIFVDDR.N              |
| <a href="#">9991</a>  | 918 - 939   | 1212.1119 | 2422.2092 | 2422.2129 | -1.51   | 0 | 122   | 6.1e-12 | 1    | U | K.GTIQELGQNQYAVSGEIFVDDR.N              |
| <a href="#">9993</a>  | 918 - 939   | 1212.1124 | 2422.2103 | 2422.2129 | -1.04   | 0 | 79    | 8.7e-08 | 1    | U | K.GTIQELGQNQYAVSGEIFVDDR.N              |
| <a href="#">9994</a>  | 918 - 939   | 808.4108  | 2422.2107 | 2422.2129 | -0.88   | 0 | 37    | 0.0038  | 1    | U | K.GTIQELGQNQYAVSGEIFVDDR.N              |
| <a href="#">9997</a>  | 918 - 939   | 1212.1129 | 2422.2112 | 2422.2129 | -0.69   | 0 | 94    | 1.6e-09 | 1    | U | K.GTIQELGQNQYAVSGEIFVDDR.N              |
| <a href="#">9999</a>  | 918 - 939   | 1212.1130 | 2422.2114 | 2422.2129 | -0.60   | 0 | 82    | 2.4e-07 | 1    | U | K.GTIQELGQNQYAVSGEIFVDDR.N              |
| <a href="#">10001</a> | 918 - 939   | 808.4112  | 2422.2119 | 2422.2129 | -0.40   | 0 | 27    | 0.0059  | 1    | U | K.GTIQELGQNQYAVSGEIFVDDR.N              |
| <a href="#">10003</a> | 918 - 939   | 808.4114  | 2422.2124 | 2422.2129 | -0.20   | 0 | 33    | 0.0044  | 1    | U | K.GTIQELGQNQYAVSGEIFVDDR.N              |
| <a href="#">10008</a> | 918 - 939   | 808.4117  | 2422.2133 | 2422.2129 | 0.18    | 0 | 28    | 0.028   | 1    | U | K.GTIQELGQNQYAVSGEIFVDDR.N              |
| <a href="#">10009</a> | 918 - 939   | 808.4117  | 2422.2133 | 2422.2129 | 0.18    | 0 | 28    | 0.022   | 1    | U | K.GTIQELGQNQYAVSGEIFVDDR.N              |
| <a href="#">10010</a> | 918 - 939   | 1212.1140 | 2422.2133 | 2422.2129 | 0.20    | 0 | 90    | 7.7e-09 | 1    | U | K.GTIQELGQNQYAVSGEIFVDDR.N              |
| <a href="#">10012</a> | 918 - 939   | 606.5606  | 2422.2135 | 2422.2129 | 0.25    | 0 | 38    | 0.015   | 1    | U | K.GTIQELGQNQYAVSGEIFVDDR.N              |
| <a href="#">10013</a> | 918 - 939   | 808.4118  | 2422.2135 | 2422.2129 | 0.26    | 0 | 43    | 0.0004  | 1    | U | K.GTIQELGQNQYAVSGEIFVDDR.N              |
| <a href="#">10016</a> | 918 - 939   | 808.4118  | 2422.2137 | 2422.2129 | 0.33    | 0 | 31    | 0.011   | 1    | U | K.GTIQELGQNQYAVSGEIFVDDR.N              |
| <a href="#">10021</a> | 918 - 939   | 1212.1144 | 2422.2142 | 2422.2129 | 0.57    | 0 | 78    | 5.1e-07 | 1    | U | K.GTIQELGQNQYAVSGEIFVDDR.N              |

| Query                 | Start - End | Observed  | Mr (expt) | Mr (calc) | ppm    | M | Score | Expect  | Rank | U | Peptide                                       |
|-----------------------|-------------|-----------|-----------|-----------|--------|---|-------|---------|------|---|-----------------------------------------------|
| <a href="#">10022</a> | 918 - 939   | 808.4120  | 2422.2143 | 2422.2129 | 0.59   | 0 | 22    | 0.036   | 1    | U | K.GTIQELGQNQYAVSGEIFVVDNR.N                   |
| <a href="#">10023</a> | 918 - 939   | 808.4121  | 2422.2146 | 2422.2129 | 0.70   | 0 | 43    | 0.0009  | 1    | U | K.GTIQELGQNQYAVSGEIFVVDNR.N                   |
| <a href="#">10027</a> | 918 - 939   | 808.4123  | 2422.2150 | 2422.2129 | 0.86   | 0 | 23    | 0.029   | 1    | U | K.GTIQELGQNQYAVSGEIFVVDNR.N                   |
| <a href="#">10030</a> | 918 - 939   | 808.4130  | 2422.2172 | 2422.2129 | 1.79   | 0 | 41    | 0.00098 | 1    | U | K.GTIQELGQNQYAVSGEIFVVDNR.N                   |
| <a href="#">10031</a> | 918 - 939   | 1212.1173 | 2422.2200 | 2422.2129 | 2.97   | 0 | 38    | 0.00046 | 1    | U | K.GTIQELGQNQYAVSGEIFVVDNR.N                   |
| <a href="#">12696</a> | 918 - 950   | 919.4807  | 3673.8939 | 3673.8952 | -0.35  | 1 | 30    | 0.011   | 1    | U | K.GTIQELGQNQYAVSGEIFVVDNRNTEITELPVR.T         |
| <a href="#">12697</a> | 918 - 950   | 1225.6394 | 3673.8963 | 3673.8952 | 0.30   | 1 | 88    | 1.3e-07 | 1    | U | K.GTIQELGQNQYAVSGEIFVVDNRNTEITELPVR.T         |
| <a href="#">12698</a> | 918 - 950   | 919.4824  | 3673.9007 | 3673.8952 | 1.51   | 1 | 24    | 0.038   | 1    | U | K.GTIQELGQNQYAVSGEIFVVDNRNTEITELPVR.T         |
| <a href="#">3570</a>  | 940 - 950   | 635.8532  | 1269.6918 | 1269.6929 | -0.83  | 0 | 34    | 0.0095  | 1    | U | R.NTVEITELPVR.T                               |
| <a href="#">3572</a>  | 940 - 950   | 635.8533  | 1269.6920 | 1269.6929 | -0.65  | 0 | 67    | 9.9e-06 | 1    | U | R.NTVEITELPVR.T                               |
| <a href="#">3573</a>  | 940 - 950   | 635.8534  | 1269.6922 | 1269.6929 | -0.49  | 0 | 40    | 0.0027  | 1    | U | R.NTVEITELPVR.T                               |
| <a href="#">3575</a>  | 940 - 950   | 635.8534  | 1269.6923 | 1269.6929 | -0.45  | 0 | 31    | 0.016   | 1    | U | R.NTVEITELPVR.T                               |
| <a href="#">3576</a>  | 940 - 950   | 635.8535  | 1269.6924 | 1269.6929 | -0.34  | 0 | 26    | 0.0042  | 1    | U | R.NTVEITELPVR.T                               |
| <a href="#">3578</a>  | 940 - 950   | 635.8536  | 1269.6927 | 1269.6929 | -0.15  | 0 | 52    | 0.00029 | 1    | U | R.NTVEITELPVR.T                               |
| <a href="#">3579</a>  | 940 - 950   | 635.8536  | 1269.6927 | 1269.6929 | -0.12  | 0 | 49    | 0.00014 | 1    | U | R.NTVEITELPVR.T                               |
| <a href="#">3581</a>  | 940 - 950   | 635.8538  | 1269.6930 | 1269.6929 | 0.14   | 0 | 27    | 0.0028  | 1    | U | R.NTVEITELPVR.T                               |
| <a href="#">3582</a>  | 940 - 950   | 635.8538  | 1269.6931 | 1269.6929 | 0.23   | 0 | 35    | 0.0032  | 1    | U | R.NTVEITELPVR.T                               |
| <a href="#">3583</a>  | 940 - 950   | 635.8539  | 1269.6932 | 1269.6929 | 0.25   | 0 | 20    | 0.05    | 1    | U | R.NTVEITELPVR.T                               |
| <a href="#">3584</a>  | 940 - 950   | 635.8539  | 1269.6932 | 1269.6929 | 0.29   | 0 | 50    | 0.00023 | 1    | U | R.NTVEITELPVR.T                               |
| <a href="#">3585</a>  | 940 - 950   | 424.2384  | 1269.6933 | 1269.6929 | 0.36   | 0 | 55    | 0.00015 | 1    | U | R.NTVEITELPVR.T                               |
| <a href="#">3586</a>  | 940 - 950   | 635.8540  | 1269.6934 | 1269.6929 | 0.42   | 0 | 55    | 0.00018 | 1    | U | R.NTVEITELPVR.T                               |
| <a href="#">971</a>   | 951 - 957   | 463.2425  | 924.4704  | 924.4705  | -0.100 | 0 | 34    | 0.031   | 1    | U | R.TWTQVYK.E                                   |
| <a href="#">5075</a>  | 958 - 970   | 737.3661  | 1472.7176 | 1472.7181 | -0.32  | 0 | 23    | 0.041   | 1    | U | K.EQVLEPMLNGTDK.T                             |
| <a href="#">5193</a>  | 958 - 970   | 745.3632  | 1488.7119 | 1488.7130 | -0.76  | 0 | 49    | 0.00019 | 1    | U | K.EQVLEPMLNGTDK.T<br>+ Oxidation (M)          |
| <a href="#">5197</a>  | 958 - 970   | 745.3639  | 1488.7132 | 1488.7130 | 0.11   | 0 | 41    | 0.0015  | 1    | U | K.EQVLEPMLNGTDK.T<br>+ Oxidation (M)          |
| <a href="#">10195</a> | 958 - 979   | 826.7528  | 2477.2367 | 2477.2359 | 0.30   | 1 | 33    | 0.0082  | 1    | U | K.EQVLEPMLNGTDKTPALISDYK.E<br>+ Oxidation (M) |
| <a href="#">1471</a>  | 971 - 979   | 504.2740  | 1006.5334 | 1006.5335 | -0.045 | 0 | 24    | 0.029   | 1    | U | K.TPALISDYK.E                                 |
| <a href="#">1472</a>  | 971 - 979   | 504.2741  | 1006.5337 | 1006.5335 | 0.17   | 0 | 36    | 0.0032  | 1    | U | K.TPALISDYK.E                                 |
| <a href="#">1473</a>  | 971 - 979   | 504.2744  | 1006.5343 | 1006.5335 | 0.79   | 0 | 58    | 5.7e-05 | 1    | U | K.TPALISDYK.E                                 |
| <a href="#">9066</a>  | 971 - 988   | 694.6839  | 2081.0299 | 2081.0317 | -0.85  | 1 | 41    | 0.0011  | 1    | U | K.TPALISDYKEYHTDITVVK.F                       |
| <a href="#">9070</a>  | 971 - 988   | 1041.5226 | 2081.0307 | 2081.0317 | -0.46  | 1 | 55    | 7.6e-06 | 1    | U | K.TPALISDYKEYHTDITVVK.F                       |
| <a href="#">9074</a>  | 971 - 988   | 1041.5232 | 2081.0319 | 2081.0317 | 0.12   | 1 | 61    | 3.3e-06 | 1    | U | K.TPALISDYKEYHTDITVVK.F                       |
| <a href="#">9075</a>  | 971 - 988   | 694.6846  | 2081.0320 | 2081.0317 | 0.13   | 1 | 22    | 0.033   | 1    | U | K.TPALISDYKEYHTDITVVK.F                       |
| <a href="#">9077</a>  | 971 - 988   | 694.6848  | 2081.0327 | 2081.0317 | 0.48   | 1 | 27    | 0.02    | 1    | U | K.TPALISDYKEYHTDITVVK.F                       |
| <a href="#">9078</a>  | 971 - 988   | 694.6866  | 2081.0380 | 2081.0317 | 3.03   | 1 | 20    | 0.03    | 1    | U | K.TPALISDYKEYHTDITVVK.F                       |
| <a href="#">2158</a>  | 980 - 988   | 547.2614  | 1092.5082 | 1092.5088 | -0.50  | 0 | 21    | 0.016   | 1    | U | K.EYHTDITVVK.F                                |
| <a href="#">2259</a>  | 998 - 1008  | 370.2080  | 1107.6021 | 1107.6036 | -1.34  | 0 | 29    | 0.014   | 1    | U | K.LAQAEAAAGLHK.V                              |
| <a href="#">2260</a>  | 998 - 1008  | 554.8086  | 1107.6026 | 1107.6036 | -0.95  | 0 | 60    | 2.5e-05 | 1    | U | K.LAQAEAAAGLHK.V                              |
| <a href="#">2262</a>  | 998 - 1008  | 554.8089  | 1107.6033 | 1107.6036 | -0.27  | 0 | 32    | 0.012   | 1    | U | K.LAQAEAAAGLHK.V                              |
| <a href="#">2263</a>  | 998 - 1008  | 370.2084  | 1107.6033 | 1107.6036 | -0.25  | 0 | 40    | 0.0038  | 1    | U | K.LAQAEAAAGLHK.V                              |
| <a href="#">2265</a>  | 998 - 1008  | 370.2084  | 1107.6035 | 1107.6036 | -0.14  | 0 | 33    | 0.003   | 1    | U | K.LAQAEAAAGLHK.V                              |
| <a href="#">2266</a>  | 998 - 1008  | 370.2084  | 1107.6035 | 1107.6036 | -0.14  | 0 | 29    | 0.024   | 1    | U | K.LAQAEAAAGLHK.V                              |
| <a href="#">2267</a>  | 998 - 1008  | 370.2085  | 1107.6036 | 1107.6036 | 0.018  | 0 | 40    | 0.0022  | 1    | U | K.LAQAEAAAGLHK.V                              |
| <a href="#">2268</a>  | 998 - 1008  | 370.2085  | 1107.6036 | 1107.6036 | 0.018  | 0 | 27    | 0.043   | 1    | U | K.LAQAEAAAGLHK.V                              |
| <a href="#">2269</a>  | 998 - 1008  | 370.2085  | 1107.6037 | 1107.6036 | 0.099  | 0 | 43    | 0.0014  | 1    | U | K.LAQAEAAAGLHK.V                              |
| <a href="#">2270</a>  | 998 - 1008  | 554.8092  | 1107.6038 | 1107.6036 | 0.15   | 0 | 45    | 0.00063 | 1    | U | K.LAQAEAAAGLHK.V                              |
| <a href="#">2271</a>  | 998 - 1008  | 554.8092  | 1107.6039 | 1107.6036 | 0.28   | 0 | 28    | 0.012   | 1    | U | K.LAQAEAAAGLHK.V                              |
| <a href="#">3256</a>  | 1032 - 1041 | 618.8448  | 1235.6751 | 1235.6761 | -0.86  | 1 | 36    | 0.0011  | 1    | U | K.KYETVQDILK.E                                |
| <a href="#">3258</a>  | 1032 - 1041 | 618.8452  | 1235.6758 | 1235.6761 | -0.23  | 1 | 54    | 5.9e-05 | 1    | U | K.KYETVQDILK.E                                |
| <a href="#">3259</a>  | 1032 - 1041 | 412.8993  | 1235.6760 | 1235.6761 | -0.12  | 1 | 37    | 0.0065  | 1    | U | K.KYETVQDILK.E                                |
| <a href="#">3260</a>  | 1032 - 1041 | 618.8453  | 1235.6761 | 1235.6761 | -0.052 | 1 | 73    | 4.9e-07 | 1    | U | K.KYETVQDILK.E                                |
| <a href="#">3261</a>  | 1032 - 1041 | 618.8454  | 1235.6761 | 1235.6761 | 0.013  | 1 | 48    | 7e-05   | 1    | U | K.KYETVQDILK.E                                |
| <a href="#">3262</a>  | 1032 - 1041 | 618.8454  | 1235.6763 | 1235.6761 | 0.16   | 1 | 50    | 8e-05   | 1    | U | K.KYETVQDILK.E                                |
| <a href="#">3263</a>  | 1032 - 1041 | 618.8455  | 1235.6764 | 1235.6761 | 0.22   | 1 | 25    | 0.013   | 1    | U | K.KYETVQDILK.E                                |
| <a href="#">3264</a>  | 1032 - 1041 | 618.8455  | 1235.6764 | 1235.6761 | 0.26   | 1 | 26    | 0.048   | 1    | U | K.KYETVQDILK.E                                |
| <a href="#">3265</a>  | 1032 - 1041 | 618.8455  | 1235.6765 | 1235.6761 | 0.27   | 1 | 30    | 0.0039  | 1    | U | K.KYETVQDILK.E                                |
| <a href="#">2258</a>  | 1033 - 1041 | 554.7988  | 1107.5831 | 1107.5812 | 1.78   | 0 | 39    | 0.0084  | 1    | U | K.YETVQDILK.E                                 |
| <a href="#">695</a>   | 1048 - 1054 | 436.2371  | 870.4597  | 870.4599  | -0.26  | 0 | 30    | 0.023   | 1    | U | R.LSYVGLR.K                                   |
| <a href="#">696</a>   | 1048 - 1054 | 436.2372  | 870.4599  | 870.4599  | -0.025 | 0 | 22    | 0.036   | 1    | U | R.LSYVGLR.K                                   |
| <a href="#">5847</a>  | 1055 - 1068 | 774.9080  | 1547.8015 | 1547.8017 | -0.16  | 1 | 67    | 1.7e-05 | 1    | U | R.KEWLVGMLGAESTK.L                            |
| <a href="#">5848</a>  | 1055 - 1068 | 516.9412  | 1547.8017 | 1547.8017 | -0.039 | 1 | 37    | 0.0074  | 1    | U | R.KEWLVGMLGAESTK.L                            |
| <a href="#">5969</a>  | 1055 - 1068 | 522.2724  | 1563.7954 | 1563.7967 | -0.81  | 1 | 14    | 0.048   | 1    | U | R.KEWLVGMLGAESTK.L<br>+ Oxidation (M)         |
| <a href="#">5970</a>  | 1055 - 1068 | 782.9050  | 1563.7955 | 1563.7967 | -0.74  | 1 | 56    | 6e-05   | 1    | U | R.KEWLVGMLGAESTK.L<br>+ Oxidation (M)         |
| <a href="#">5971</a>  | 1055 - 1068 | 522.2725  | 1563.7956 | 1563.7967 | -0.67  | 1 | 27    | 0.015   | 1    | U | R.KEWLVGMLGAESTK.L<br>+ Oxidation (M)         |
| <a href="#">5972</a>  | 1055 - 1068 | 782.9053  | 1563.7960 | 1563.7967 | -0.43  | 1 | 76    | 4.5e-07 | 1    | U | R.KEWLVGMLGAESTK.L<br>+ Oxidation (M)         |
| <a href="#">5974</a>  | 1055 - 1068 | 782.9055  | 1563.7965 | 1563.7967 | -0.085 | 1 | 68    | 1.5e-06 | 1    | U | R.KEWLVGMLGAESTK.L<br>+ Oxidation (M)         |
| <a href="#">5975</a>  | 1055 - 1068 | 782.9057  | 1563.7968 | 1563.7967 | 0.068  | 1 | 68    | 4e-06   | 1    | U | R.KEWLVGMLGAESTK.L<br>+ Oxidation (M)         |
| <a href="#">5976</a>  | 1055 - 1068 | 522.2730  | 1563.7973 | 1563.7967 | 0.38   | 1 | 20    | 0.013   | 1    | U | R.KEWLVGMLGAESTK.L<br>+ Oxidation (M)         |
| <a href="#">5977</a>  | 1055 - 1068 | 522.2731  | 1563.7976 | 1563.7967 | 0.60   | 1 | 33    | 0.0025  | 1    | U | R.KEWLVGMLGAESTK.L<br>+ Oxidation (M)         |
| <a href="#">4623</a>  | 1056 - 1068 | 710.8608  | 1419.7070 | 1419.7068 | 0.18   | 0 | 32    | 0.0022  | 1    | U | K.EWLVGMLGAESTK.L                             |
| <a href="#">4625</a>  | 1056 - 1068 | 710.8612  | 1419.7079 | 1419.7068 | 0.80   | 0 | 34    | 0.0025  | 1    | U | K.EWLVGMLGAESTK.L                             |
| <a href="#">4761</a>  | 1056 - 1068 | 718.8567  | 1435.6989 | 1435.7017 | -1.96  | 0 | 33    | 0.043   | 1    | U | K.EWLVGMLGAESTK.L<br>+ Oxidation (M)          |
| <a href="#">4763</a>  | 1056 - 1068 | 718.8572  | 1435.6999 | 1435.7017 | -1.22  | 0 | 34    | 0.033   | 1    | U | K.EWLVGMLGAESTK.L<br>+ Oxidation (M)          |
| <a href="#">3340</a>  | 1092 - 1101 | 415.2443  | 1242.7110 | 1242.7118 | -0.64  | 1 | 44    | 0.0015  | 1    | U | K.KDLIQMLVQR.G                                |
| <a href="#">3341</a>  | 1092 - 1101 | 622.3628  | 1242.7111 | 1242.7118 | -0.56  | 1 | 57    | 7.9e-05 | 1    | U | K.KDLIQMLVQR.G                                |
| <a href="#">3482</a>  | 1092 - 1101 | 630.3597  | 1258.7049 | 1258.7067 | -1.46  | 1 | 55    | 0.00014 | 1    | U | K.KDLIQMLVQR.G<br>+ Oxidation (M)             |
| <a href="#">3483</a>  | 1092 - 1101 | 630.3608  | 1258.7070 | 1258.7067 | 0.26   | 1 | 55    | 0.00014 | 1    | U | K.KDLIQMLVQR.G<br>+ Oxidation (M)             |
| <a href="#">3484</a>  | 1092 - 1101 | 420.5766  | 1258.7080 | 1258.7067 | 1.01   | 1 | 38    | 0.0057  | 1    | U | K.KDLIQMLVQR.G<br>+ Oxidation (M)             |



| Query                 | Start - End | Observed  | Mr (expt) | Mr (calc) | ppm    | M | Score | Expect  | Rank | U | Peptide                                            |
|-----------------------|-------------|-----------|-----------|-----------|--------|---|-------|---------|------|---|----------------------------------------------------|
| <a href="#">2326</a>  | 1093 - 1101 | 558.3155  | 1114.6164 | 1114.6169 | -0.43  | 0 | 45    | 0.0019  | 1    | U | K.DLIQMLVQR.G                                      |
| <a href="#">2327</a>  | 1093 - 1101 | 558.3157  | 1114.6169 | 1114.6169 | 0.014  | 0 | 64    | 2.3e-05 | 1    | U | K.DLIQMLVQR.G                                      |
| <a href="#">2328</a>  | 1093 - 1101 | 558.3157  | 1114.6169 | 1114.6169 | 0.014  | 0 | 51    | 0.0004  | 1    | U | K.DLIQMLVQR.G                                      |
| <a href="#">2329</a>  | 1093 - 1101 | 558.3158  | 1114.6171 | 1114.6169 | 0.25   | 0 | 52    | 0.0004  | 1    | U | K.DLIQMLVQR.G                                      |
| <a href="#">2475</a>  | 1093 - 1101 | 566.3125  | 1130.6104 | 1130.6118 | -1.21  | 0 | 51    | 0.00039 | 1    | U | K.DLIQMLVQR.G<br>+ Oxidation (M)                   |
| <a href="#">2476</a>  | 1093 - 1101 | 566.3125  | 1130.6105 | 1130.6118 | -1.12  | 0 | 54    | 0.00026 | 1    | U | K.DLIQMLVQR.G<br>+ Oxidation (M)                   |
| <a href="#">2477</a>  | 1093 - 1101 | 566.3128  | 1130.6110 | 1130.6118 | -0.67  | 0 | 54    | 0.00025 | 1    | U | K.DLIQMLVQR.G<br>+ Oxidation (M)                   |
| <a href="#">2478</a>  | 1093 - 1101 | 566.3128  | 1130.6111 | 1130.6118 | -0.57  | 0 | 47    | 0.00092 | 1    | U | K.DLIQMLVQR.G<br>+ Oxidation (M)                   |
| <a href="#">2479</a>  | 1093 - 1101 | 566.3130  | 1130.6114 | 1130.6118 | -0.36  | 0 | 44    | 0.002   | 1    | U | K.DLIQMLVQR.G<br>+ Oxidation (M)                   |
| <a href="#">2480</a>  | 1093 - 1101 | 566.3130  | 1130.6114 | 1130.6118 | -0.36  | 0 | 48    | 0.00043 | 1    | U | K.DLIQMLVQR.G<br>+ Oxidation (M)                   |
| <a href="#">2481</a>  | 1093 - 1101 | 566.3130  | 1130.6114 | 1130.6118 | -0.30  | 0 | 37    | 0.012   | 1    | U | K.DLIQMLVQR.G<br>+ Oxidation (M)                   |
| <a href="#">2482</a>  | 1093 - 1101 | 566.3133  | 1130.6120 | 1130.6118 | 0.19   | 0 | 52    | 0.00046 | 1    | U | K.DLIQMLVQR.G<br>+ Oxidation (M)                   |
| <a href="#">2483</a>  | 1093 - 1101 | 566.3135  | 1130.6124 | 1130.6118 | 0.53   | 0 | 32    | 0.041   | 1    | U | K.DLIQMLVQR.G<br>+ Oxidation (M)                   |
| <a href="#">2485</a>  | 1093 - 1101 | 566.3135  | 1130.6125 | 1130.6118 | 0.65   | 0 | 33    | 0.0078  | 1    | U | K.DLIQMLVQR.G<br>+ Oxidation (M)                   |
| <a href="#">2486</a>  | 1093 - 1101 | 566.3140  | 1130.6134 | 1130.6118 | 1.41   | 0 | 52    | 0.00037 | 1    | U | K.DLIQMLVQR.G<br>+ Oxidation (M)                   |
| <a href="#">790</a>   | 1102 - 1109 | 447.7128  | 893.4111  | 893.4131  | -2.13  | 0 | 38    | 0.00053 | 1    | U | R.GYESDPVK.A                                       |
| <a href="#">793</a>   | 1102 - 1109 | 447.7140  | 893.4135  | 893.4131  | 0.46   | 0 | 41    | 0.00032 | 1    | U | R.GYESDPVK.A                                       |
| <a href="#">794</a>   | 1102 - 1109 | 447.7142  | 893.4138  | 893.4131  | 0.89   | 0 | 16    | 0.034   | 1    | U | R.GYESDPVK.A                                       |
| <a href="#">1350</a>  | 1157 - 1164 | 494.2897  | 986.5648  | 986.5648  | 0.034  | 1 | 33    | 0.022   | 2    | U | K.EKVEELIK.Q                                       |
| <a href="#">1351</a>  | 1157 - 1164 | 494.2899  | 986.5652  | 986.5648  | 0.44   | 1 | 28    | 0.041   | 2    | U | K.EKVEELIK.Q                                       |
| <a href="#">1003</a>  | 1170 - 1177 | 465.7541  | 929.4936  | 929.4930  | 0.63   | 1 | 31    | 0.041   | 1    | U | K.GREVNDLKR.R                                      |
| <a href="#">2098</a>  | 1170 - 1178 | 543.8044  | 1085.5943 | 1085.5941 | 0.20   | 2 | 44    | 0.002   | 1    | U | K.GREVNDLKR.K                                      |
| <a href="#">2099</a>  | 1170 - 1178 | 362.8722  | 1085.5949 | 1085.5941 | 0.67   | 2 | 47    | 0.0012  | 1    | U | K.GREVNDLKR.K                                      |
| <a href="#">710</a>   | 1172 - 1178 | 437.2432  | 872.4717  | 872.4716  | 0.22   | 1 | 44    | 0.0021  | 1    | U | R.EVNDLKR.K                                        |
| <a href="#">493</a>   | 1180 - 1186 | 416.7139  | 831.4132  | 831.4127  | 0.68   | 0 | 35    | 0.016   | 1    | K | SPSDLWK.E                                          |
| <a href="#">4376</a>  | 1187 - 1198 | 689.8401  | 1377.6657 | 1377.6664 | -0.47  | 0 | 58    | 4.1e-05 | 1    | U | K.EDLAAFVEELDK.V                                   |
| <a href="#">4379</a>  | 1187 - 1198 | 689.8413  | 1377.6681 | 1377.6664 | 1.29   | 0 | 54    | 1.8e-05 | 1    | U | K.EDLAAFVEELDK.V                                   |
| <a href="#">9170</a>  | 1187 - 1204 | 1054.0100 | 2106.0054 | 2106.0117 | -2.98  | 1 | 88    | 6.6e-08 | 1    | U | K.EDLAAFVEELDKVESQER.E                             |
| <a href="#">9171</a>  | 1187 - 1204 | 703.0102  | 2106.0089 | 2106.0117 | -1.33  | 1 | 27    | 0.011   | 1    | U | K.EDLAAFVEELDKVESQER.E                             |
| <a href="#">9173</a>  | 1187 - 1204 | 703.0108  | 2106.0107 | 2106.0117 | -0.47  | 1 | 44    | 0.00075 | 1    | U | K.EDLAAFVEELDKVESQER.E                             |
| <a href="#">9174</a>  | 1187 - 1204 | 1054.0127 | 2106.0108 | 2106.0117 | -0.42  | 1 | 64    | 3.2e-05 | 1    | U | K.EDLAAFVEELDKVESQER.E                             |
| <a href="#">9175</a>  | 1187 - 1204 | 703.0109  | 2106.0108 | 2106.0117 | -0.39  | 1 | 46    | 0.00065 | 1    | U | K.EDLAAFVEELDKVESQER.E                             |
| <a href="#">9176</a>  | 1187 - 1204 | 1054.0129 | 2106.0112 | 2106.0117 | -0.19  | 1 | 84    | 5.4e-08 | 1    | U | K.EDLAAFVEELDKVESQER.E                             |
| <a href="#">9177</a>  | 1187 - 1204 | 703.0111  | 2106.0114 | 2106.0117 | -0.13  | 1 | 38    | 0.0037  | 1    | U | K.EDLAAFVEELDKVESQER.E                             |
| <a href="#">9179</a>  | 1187 - 1204 | 703.0111  | 2106.0114 | 2106.0117 | -0.12  | 1 | 50    | 0.00028 | 1    | U | K.EDLAAFVEELDKVESQER.E                             |
| <a href="#">9180</a>  | 1187 - 1204 | 703.0111  | 2106.0115 | 2106.0117 | -0.074 | 1 | 33    | 0.0053  | 1    | U | K.EDLAAFVEELDKVESQER.E                             |
| <a href="#">9181</a>  | 1187 - 1204 | 703.0111  | 2106.0116 | 2106.0117 | -0.046 | 1 | 44    | 0.0022  | 1    | U | K.EDLAAFVEELDKVESQER.E                             |
| <a href="#">9182</a>  | 1187 - 1204 | 703.0112  | 2106.0117 | 2106.0117 | 0.011  | 1 | 41    | 0.0019  | 1    | U | K.EDLAAFVEELDKVESQER.E                             |
| <a href="#">9183</a>  | 1187 - 1204 | 1054.0131 | 2106.0117 | 2106.0117 | 0.033  | 1 | 76    | 6.7e-07 | 1    | U | K.EDLAAFVEELDKVESQER.E                             |
| <a href="#">9184</a>  | 1187 - 1204 | 1054.0131 | 2106.0117 | 2106.0117 | 0.033  | 1 | 64    | 6e-06   | 1    | U | K.EDLAAFVEELDKVESQER.E                             |
| <a href="#">9185</a>  | 1187 - 1204 | 703.0112  | 2106.0118 | 2106.0117 | 0.054  | 1 | 44    | 0.0003  | 1    | U | K.EDLAAFVEELDKVESQER.E                             |
| <a href="#">9186</a>  | 1187 - 1204 | 1054.0133 | 2106.0120 | 2106.0117 | 0.15   | 1 | 60    | 3.1e-05 | 1    | U | K.EDLAAFVEELDKVESQER.E                             |
| <a href="#">9187</a>  | 1187 - 1204 | 703.0113  | 2106.0121 | 2106.0117 | 0.21   | 1 | 41    | 0.0018  | 1    | U | K.EDLAAFVEELDKVESQER.E                             |
| <a href="#">9188</a>  | 1187 - 1204 | 703.0113  | 2106.0121 | 2106.0117 | 0.23   | 1 | 44    | 0.00096 | 1    | U | K.EDLAAFVEELDKVESQER.E                             |
| <a href="#">9189</a>  | 1187 - 1204 | 703.0113  | 2106.0122 | 2106.0117 | 0.24   | 1 | 53    | 8.8e-05 | 1    | U | K.EDLAAFVEELDKVESQER.E                             |
| <a href="#">9190</a>  | 1187 - 1204 | 703.0113  | 2106.0122 | 2106.0117 | 0.24   | 1 | 54    | 0.00021 | 1    | U | K.EDLAAFVEELDKVESQER.E                             |
| <a href="#">9191</a>  | 1187 - 1204 | 703.0114  | 2106.0123 | 2106.0117 | 0.32   | 1 | 38    | 0.0017  | 1    | U | K.EDLAAFVEELDKVESQER.E                             |
| <a href="#">9192</a>  | 1187 - 1204 | 1054.0140 | 2106.0134 | 2106.0117 | 0.84   | 1 | 57    | 3.8e-05 | 1    | U | K.EDLAAFVEELDKVESQER.E                             |
| <a href="#">11594</a> | 1187 - 1214 | 1032.1680 | 3093.4821 | 3093.4812 | 0.28   | 2 | 54    | 0.00013 | 1    | U | K.EDLAAFVEELDKVESQEREDVLAMSGK.A                    |
| <a href="#">11600</a> | 1187 - 1214 | 1032.1684 | 3093.4835 | 3093.4812 | 0.76   | 2 | 64    | 9.6e-06 | 1    | U | K.EDLAAFVEELDKVESQEREDVLAMSGK.A                    |
| <a href="#">11604</a> | 1187 - 1214 | 1032.1702 | 3093.4887 | 3093.4812 | 2.42   | 2 | 40    | 0.0025  | 1    | U | K.EDLAAFVEELDKVESQEREDVLAMSGK.A                    |
| <a href="#">11657</a> | 1187 - 1214 | 1037.4985 | 3109.4737 | 3109.4761 | -0.78  | 2 | 48    | 0.00017 | 1    | U | K.EDLAAFVEELDKVESQEREDVLAMSGK.A<br>+ Oxidation (M) |
| <a href="#">11659</a> | 1187 - 1214 | 1037.4989 | 3109.4748 | 3109.4761 | -0.43  | 2 | 40    | 0.0013  | 1    | U | K.EDLAAFVEELDKVESQEREDVLAMSGK.A<br>+ Oxidation (M) |
| <a href="#">11660</a> | 1187 - 1214 | 1037.4996 | 3109.4769 | 3109.4761 | 0.27   | 2 | 59    | 1.6e-05 | 1    | U | K.EDLAAFVEELDKVESQEREDVLAMSGK.A<br>+ Oxidation (M) |
| <a href="#">11668</a> | 1187 - 1214 | 1037.5005 | 3109.4796 | 3109.4761 | 1.12   | 2 | 49    | 0.00022 | 1    | U | K.EDLAAFVEELDKVESQEREDVLAMSGK.A<br>+ Oxidation (M) |
| <a href="#">7244</a>  | 1199 - 1214 | 867.9206  | 1733.8267 | 1733.8254 | 0.78   | 1 | 64    | 3.4e-06 | 1    | U | K.VESQEREDVLAMSGK.A                                |
| <a href="#">7246</a>  | 1199 - 1214 | 867.9225  | 1733.8304 | 1733.8254 | 2.88   | 1 | 52    | 7.2e-05 | 1    | U | K.VESQEREDVLAMSGK.A                                |
| <a href="#">7359</a>  | 1199 - 1214 | 584.2806  | 1749.8200 | 1749.8203 | -0.16  | 1 | 43    | 0.00095 | 1    | U | K.VESQEREDVLAMSGK.A<br>+ Oxidation (M)             |
| <a href="#">7360</a>  | 1199 - 1214 | 875.9176  | 1749.8206 | 1749.8203 | 0.19   | 1 | 64    | 4.9e-06 | 1    | U | K.VESQEREDVLAMSGK.A<br>+ Oxidation (M)             |
| <a href="#">1460</a>  | 1205 - 1214 | 503.7472  | 1005.4799 | 1005.4801 | -0.16  | 0 | 46    | 0.00029 | 1    | U | R.EDVLAMSGK.A                                      |
| <a href="#">1571</a>  | 1205 - 1214 | 511.7444  | 1021.4743 | 1021.4750 | -0.66  | 0 | 46    | 0.0005  | 1    | U | R.EDVLAMSGK.A<br>+ Oxidation (M)                   |
| <a href="#">1572</a>  | 1205 - 1214 | 511.7445  | 1021.4744 | 1021.4750 | -0.59  | 0 | 53    | 0.00011 | 1    | U | R.EDVLAMSGK.A<br>+ Oxidation (M)                   |
| <a href="#">1573</a>  | 1205 - 1214 | 511.7445  | 1021.4744 | 1021.4750 | -0.55  | 0 | 48    | 0.00038 | 1    | U | R.EDVLAMSGK.A<br>+ Oxidation (M)                   |
| <a href="#">1574</a>  | 1205 - 1214 | 511.7446  | 1021.4747 | 1021.4750 | -0.29  | 0 | 40    | 0.00075 | 1    | U | R.EDVLAMSGK.A<br>+ Oxidation (M)                   |
| <a href="#">1576</a>  | 1205 - 1214 | 511.7448  | 1021.4750 | 1021.4750 | 0.022  | 0 | 40    | 0.0021  | 1    | U | R.EDVLAMSGK.A<br>+ Oxidation (M)                   |
| <a href="#">1577</a>  | 1205 - 1214 | 511.7449  | 1021.4753 | 1021.4750 | 0.26   | 0 | 56    | 8.8e-05 | 1    | U | R.EDVLAMSGK.A<br>+ Oxidation (M)                   |
| <a href="#">1578</a>  | 1205 - 1214 | 511.7450  | 1021.4753 | 1021.4750 | 0.33   | 0 | 39    | 0.0017  | 1    | U | R.EDVLAMSGK.A<br>+ Oxidation (M)                   |
| <a href="#">1579</a>  | 1205 - 1214 | 511.7450  | 1021.4754 | 1021.4750 | 0.37   | 0 | 42    | 0.0013  | 1    | U | R.EDVLAMSGK.A<br>+ Oxidation (M)                   |
| <a href="#">6582</a>  | 1227 - 1240 | 550.2835  | 1647.8287 | 1647.8290 | -0.19  | 1 | 16    | 0.049   | 1    | U | K.KLQLEETMPSYGR.R                                  |

| Query                 | Start - End | Observed  | Mr (expt) | Mr (calc) | ppm     | M | Score | Expect  | Rank | U | Peptide                                         |
|-----------------------|-------------|-----------|-----------|-----------|---------|---|-------|---------|------|---|-------------------------------------------------|
| <a href="#">6583</a>  | 1227 - 1240 | 824.9218  | 1647.8291 | 1647.8290 | 0.035   | 1 | 69    | 5.4e-07 | 1    | U | K.KLQLEETMPSPYGR.R                              |
| <a href="#">6584</a>  | 1227 - 1240 | 824.9218  | 1647.8291 | 1647.8290 | 0.084   | 1 | 84    | 6.9e-08 | 1    | U | K.KLQLEETMPSPYGR.R                              |
| <a href="#">6586</a>  | 1227 - 1240 | 550.2840  | 1647.8303 | 1647.8290 | 0.78    | 1 | 26    | 0.011   | 1    | U | K.KLQLEETMPSPYGR.R                              |
| <a href="#">6672</a>  | 1227 - 1240 | 555.6147  | 1663.8223 | 1663.8239 | -0.96   | 1 | 34    | 0.0088  | 1    | U | K.KLQLEETMPSPYGR.R<br>+ Oxidation (M)           |
| <a href="#">6673</a>  | 1227 - 1240 | 832.9186  | 1663.8227 | 1663.8239 | -0.75   | 1 | 69    | 4.5e-07 | 1    | U | K.KLQLEETMPSPYGR.R<br>+ Oxidation (M)           |
| <a href="#">6674</a>  | 1227 - 1240 | 832.9187  | 1663.8229 | 1663.8239 | -0.64   | 1 | 95    | 3.5e-09 | 1    | U | K.KLQLEETMPSPYGR.R<br>+ Oxidation (M)           |
| <a href="#">6675</a>  | 1227 - 1240 | 832.9188  | 1663.8230 | 1663.8239 | -0.57   | 1 | 66    | 2e-06   | 1    | U | K.KLQLEETMPSPYGR.R<br>+ Oxidation (M)           |
| <a href="#">6678</a>  | 1227 - 1240 | 832.9188  | 1663.8231 | 1663.8239 | -0.47   | 1 | 68    | 1.7e-06 | 1    | U | K.KLQLEETMPSPYGR.R<br>+ Oxidation (M)           |
| <a href="#">6679</a>  | 1227 - 1240 | 832.9190  | 1663.8235 | 1663.8239 | -0.27   | 1 | 17    | 0.044   | 1    | U | K.KLQLEETMPSPYGR.R<br>+ Oxidation (M)           |
| <a href="#">6680</a>  | 1227 - 1240 | 832.9190  | 1663.8235 | 1663.8239 | -0.23   | 1 | 51    | 4.5e-05 | 1    | U | K.KLQLEETMPSPYGR.R<br>+ Oxidation (M)           |
| <a href="#">6681</a>  | 1227 - 1240 | 832.9191  | 1663.8236 | 1663.8239 | -0.17   | 1 | 52    | 4e-05   | 1    | U | K.KLQLEETMPSPYGR.R<br>+ Oxidation (M)           |
| <a href="#">6682</a>  | 1227 - 1240 | 832.9192  | 1663.8237 | 1663.8239 | -0.11   | 1 | 66    | 2.2e-06 | 1    | U | K.KLQLEETMPSPYGR.R<br>+ Oxidation (M)           |
| <a href="#">6683</a>  | 1227 - 1240 | 832.9192  | 1663.8238 | 1663.8239 | -0.097  | 1 | 75    | 2.5e-07 | 1    | U | K.KLQLEETMPSPYGR.R<br>+ Oxidation (M)           |
| <a href="#">6685</a>  | 1227 - 1240 | 555.6153  | 1663.8242 | 1663.8239 | 0.16    | 1 | 21    | 0.035   | 1    | U | K.KLQLEETMPSPYGR.R<br>+ Oxidation (M)           |
| <a href="#">6686</a>  | 1227 - 1240 | 555.6154  | 1663.8244 | 1663.8239 | 0.28    | 1 | 19    | 0.049   | 1    | U | K.KLQLEETMPSPYGR.R<br>+ Oxidation (M)           |
| <a href="#">6687</a>  | 1227 - 1240 | 555.6155  | 1663.8247 | 1663.8239 | 0.46    | 1 | 30    | 0.023   | 1    | U | K.KLQLEETMPSPYGR.R<br>+ Oxidation (M)           |
| <a href="#">6688</a>  | 1227 - 1240 | 832.9197  | 1663.8248 | 1663.8239 | 0.52    | 1 | 68    | 1.1e-06 | 1    | U | K.KLQLEETMPSPYGR.R<br>+ Oxidation (M)           |
| <a href="#">5524</a>  | 1228 - 1240 | 760.8741  | 1519.7337 | 1519.7341 | -0.25   | 0 | 56    | 2.4e-05 | 1    | U | K.LQLEETMPSPYGR.R                               |
| <a href="#">5528</a>  | 1228 - 1240 | 507.5862  | 1519.7367 | 1519.7341 | 1.73    | 0 | 23    | 0.038   | 1    | U | K.LQLEETMPSPYGR.R                               |
| <a href="#">5529</a>  | 1228 - 1240 | 760.8761  | 1519.7376 | 1519.7341 | 2.32    | 0 | 32    | 0.0021  | 1    | U | K.LQLEETMPSPYGR.R                               |
| <a href="#">5729</a>  | 1228 - 1240 | 768.8716  | 1535.7287 | 1535.7290 | -0.15   | 0 | 32    | 0.0048  | 1    | U | K.LQLEETMPSPYGR.R<br>+ Oxidation (M)            |
| <a href="#">5731</a>  | 1228 - 1240 | 768.8718  | 1535.7290 | 1535.7290 | -0.0033 | 0 | 67    | 4.9e-06 | 1    | U | K.LQLEETMPSPYGR.R<br>+ Oxidation (M)            |
| <a href="#">5734</a>  | 1228 - 1240 | 768.8718  | 1535.7291 | 1535.7290 | 0.10    | 0 | 63    | 4.7e-06 | 1    | U | K.LQLEETMPSPYGR.R<br>+ Oxidation (M)            |
| <a href="#">5735</a>  | 1228 - 1240 | 768.8718  | 1535.7291 | 1535.7290 | 0.11    | 0 | 67    | 4.1e-06 | 1    | U | K.LQLEETMPSPYGR.R<br>+ Oxidation (M)            |
| <a href="#">5736</a>  | 1228 - 1240 | 768.8719  | 1535.7293 | 1535.7290 | 0.21    | 0 | 74    | 5.5e-07 | 1    | U | K.LQLEETMPSPYGR.R<br>+ Oxidation (M)            |
| <a href="#">5737</a>  | 1228 - 1240 | 768.8720  | 1535.7295 | 1535.7290 | 0.35    | 0 | 84    | 1.3e-07 | 1    | U | K.LQLEETMPSPYGR.R<br>+ Oxidation (M)            |
| <a href="#">2808</a>  | 1241 - 1250 | 586.3469  | 1170.6792 | 1170.6794 | -0.22   | 1 | 21    | 0.039   | 1    | U | R.RIIPETAMK.A                                   |
| <a href="#">2810</a>  | 1241 - 1250 | 586.3470  | 1170.6794 | 1170.6794 | -0.034  | 1 | 38    | 0.00084 | 1    | U | R.RIIPETAMK.A                                   |
| <a href="#">2811</a>  | 1241 - 1250 | 391.2338  | 1170.6794 | 1170.6794 | -0.0051 | 1 | 36    | 0.00057 | 1    | U | R.RIIPETAMK.A                                   |
| <a href="#">2911</a>  | 1241 - 1250 | 594.3439  | 1186.6733 | 1186.6743 | -0.89   | 1 | 34    | 0.0013  | 1    | U | R.RIIPETAMK.A<br>+ Oxidation (M)                |
| <a href="#">2912</a>  | 1241 - 1250 | 396.5654  | 1186.6743 | 1186.6743 | -0.080  | 1 | 39    | 0.00055 | 1    | U | R.RIIPETAMK.A<br>+ Oxidation (M)                |
| <a href="#">2916</a>  | 1241 - 1250 | 594.3445  | 1186.6745 | 1186.6743 | 0.10    | 1 | 37    | 0.00093 | 1    | U | R.RIIPETAMK.A<br>+ Oxidation (M)                |
| <a href="#">2917</a>  | 1241 - 1250 | 594.3445  | 1186.6745 | 1186.6743 | 0.12    | 1 | 38    | 0.00055 | 1    | U | R.RIIPETAMK.A<br>+ Oxidation (M)                |
| <a href="#">2919</a>  | 1241 - 1250 | 594.3448  | 1186.6749 | 1186.6743 | 0.51    | 1 | 34    | 0.0013  | 1    | U | R.RIIPETAMK.A<br>+ Oxidation (M)                |
| <a href="#">1532</a>  | 1242 - 1250 | 508.2964  | 1014.5782 | 1014.5783 | -0.074  | 0 | 42    | 0.0018  | 1    | U | R.IIPEITAMK.A                                   |
| <a href="#">1642</a>  | 1242 - 1250 | 516.2939  | 1030.5733 | 1030.5732 | 0.045   | 0 | 28    | 0.013   | 1    | U | R.IIPEITAMK.A<br>+ Oxidation (M)                |
| <a href="#">2603</a>  | 1261 - 1271 | 573.3300  | 1144.6453 | 1144.6452 | 0.15    | 2 | 65    | 1.4e-05 | 1    | U | K.KGDLDTAAVK.V                                  |
| <a href="#">1548</a>  | 1262 - 1271 | 509.2820  | 1016.5495 | 1016.5502 | -0.68   | 1 | 64    | 2.4e-05 | 1    | U | K.KGDLDTAAVK.V                                  |
| <a href="#">1549</a>  | 1262 - 1271 | 509.2822  | 1016.5498 | 1016.5502 | -0.36   | 1 | 48    | 0.00092 | 1    | U | K.KGDLDTAAVK.V                                  |
| <a href="#">1550</a>  | 1262 - 1271 | 509.2822  | 1016.5498 | 1016.5502 | -0.36   | 1 | 31    | 0.048   | 1    | U | K.KGDLDTAAVK.V                                  |
| <a href="#">1551</a>  | 1262 - 1271 | 509.2824  | 1016.5502 | 1016.5502 | -0.048  | 1 | 40    | 0.0056  | 1    | U | K.KGDLDTAAVK.V                                  |
| <a href="#">1552</a>  | 1262 - 1271 | 509.2826  | 1016.5506 | 1016.5502 | 0.35    | 1 | 50    | 0.00058 | 1    | U | K.KGDLDTAAVK.V                                  |
| <a href="#">2189</a>  | 1262 - 1271 | 549.2657  | 1096.5169 | 1096.5165 | 0.32    | 1 | 40    | 0.0052  | 1    | U | K.KGDLDTAAVK.V<br>+ Phospho (ST)                |
| <a href="#">776</a>   | 1263 - 1271 | 445.2349  | 888.4552  | 888.4553  | -0.10   | 0 | 33    | 0.029   | 1    | U | K.GDLDTAAVK.V                                   |
| <a href="#">777</a>   | 1263 - 1271 | 445.2350  | 888.4553  | 888.4553  | 0.098   | 0 | 34    | 0.018   | 1    | U | K.GDLDTAAVK.V                                   |
| <a href="#">11081</a> | 1272 - 1299 | 973.4680  | 2917.3821 | 2917.3869 | -1.64   | 0 | 31    | 0.0046  | 1    | U | K.VFDEEFGAPVEGAGEEALTPSPINK.G                   |
| <a href="#">11083</a> | 1272 - 1299 | 973.4688  | 2917.3845 | 2917.3869 | -0.83   | 0 | 28    | 0.016   | 1    | U | K.VFDEEFGAPVEGAGEEALTPSPINK.G                   |
| <a href="#">11086</a> | 1272 - 1299 | 973.4688  | 2917.3846 | 2917.3869 | -0.78   | 0 | 36    | 0.0018  | 1    | U | K.VFDEEFGAPVEGAGEEALTPSPINK.G                   |
| <a href="#">11087</a> | 1272 - 1299 | 973.4689  | 2917.3848 | 2917.3869 | -0.72   | 0 | 47    | 0.00019 | 1    | U | K.VFDEEFGAPVEGAGEEALTPSPINK.G                   |
| <a href="#">11092</a> | 1272 - 1299 | 973.4694  | 2917.3865 | 2917.3869 | -0.13   | 0 | 50    | 7.2e-05 | 1    | U | K.VFDEEFGAPVEGAGEEALTPSPINK.G                   |
| <a href="#">11096</a> | 1272 - 1299 | 973.4696  | 2917.3870 | 2917.3869 | 0.034   | 0 | 60    | 4.8e-05 | 1    | U | K.VFDEEFGAPVEGAGEEALTPSPINK.G                   |
| <a href="#">11098</a> | 1272 - 1299 | 973.4697  | 2917.3872 | 2917.3869 | 0.12    | 0 | 39    | 0.0021  | 1    | U | K.VFDEEFGAPVEGAGEEALTPSPINK.G                   |
| <a href="#">11100</a> | 1272 - 1299 | 973.4698  | 2917.3874 | 2917.3869 | 0.18    | 0 | 42    | 0.0003  | 1    | U | K.VFDEEFGAPVEGAGEEALTPSPINK.G                   |
| <a href="#">11101</a> | 1272 - 1299 | 973.4698  | 2917.3876 | 2917.3869 | 0.23    | 0 | 40    | 0.0026  | 1    | U | K.VFDEEFGAPVEGAGEEALTPSPINK.G                   |
| <a href="#">11102</a> | 1272 - 1299 | 973.4699  | 2917.3880 | 2917.3869 | 0.37    | 0 | 31    | 0.0071  | 1    | U | K.VFDEEFGAPVEGAGEEALTPSPINK.G                   |
| <a href="#">11103</a> | 1272 - 1299 | 973.4701  | 2917.3885 | 2917.3869 | 0.55    | 0 | 56    | 3.9e-05 | 1    | U | K.VFDEEFGAPVEGAGEEALTPSPINK.G                   |
| <a href="#">11107</a> | 1272 - 1299 | 973.4706  | 2917.3900 | 2917.3869 | 1.05    | 0 | 26    | 0.041   | 1    | U | K.VFDEEFGAPVEGAGEEALTPSPINK.G                   |
| <a href="#">11109</a> | 1272 - 1299 | 973.4715  | 2917.3927 | 2917.3869 | 2.00    | 0 | 34    | 0.0031  | 1    | U | K.VFDEEFGAPVEGAGEEALTPSPINK.G                   |
| <a href="#">11387</a> | 1272 - 1299 | 1000.1245 | 2997.3516 | 2997.3532 | -0.56   | 0 | 55    | 7.8e-05 | 1    | U | K.VFDEEFGAPVEGAGEEALTPSPINK.G<br>+ Phospho (ST) |
| <a href="#">2932</a>  | 1316 - 1327 | 396.8907  | 1187.6502 | 1187.6510 | -0.63   | 1 | 26    | 0.027   | 1    | U | R.KTPTSSGKPSAK.K                                |
| <a href="#">2935</a>  | 1316 - 1327 | 594.8327  | 1187.6508 | 1187.6510 | -0.13   | 1 | 31    | 0.009   | 1    | U | R.KTPTSSGKPSAK.K                                |
| <a href="#">2936</a>  | 1316 - 1327 | 396.8909  | 1187.6508 | 1187.6510 | -0.12   | 1 | 33    | 0.024   | 1    | U | R.KTPTSSGKPSAK.K                                |
| <a href="#">2937</a>  | 1316 - 1327 | 594.8328  | 1187.6511 | 1187.6510 | 0.069   | 1 | 52    | 0.00042 | 1    | U | R.KTPTSSGKPSAK.K                                |
| <a href="#">2940</a>  | 1316 - 1327 | 594.8330  | 1187.6514 | 1187.6510 | 0.34    | 1 | 33    | 0.013   | 1    | U | R.KTPTSSGKPSAK.K                                |
| <a href="#">1864</a>  | 1317 - 1327 | 530.7851  | 1059.5557 | 1059.5560 | -0.34   | 0 | 25    | 0.02    | 1    | U | K.TPTSSGKPSAK.K                                 |
| <a href="#">1868</a>  | 1317 - 1327 | 530.7853  | 1059.5560 | 1059.5560 | -0.0019 | 0 | 37    | 0.0013  | 1    | U | K.TPTSSGKPSAK.K                                 |

| Query                 | Start - End | Observed  | Mr (expt) | Mr (calc) | ppm    | M | Score | Expect  | Rank | U | Peptide                                                |
|-----------------------|-------------|-----------|-----------|-----------|--------|---|-------|---------|------|---|--------------------------------------------------------|
| <a href="#">11070</a> | 1332 - 1356 | 972.1275  | 2913.3608 | 2913.3628 | -0.69  | 2 | 83    | 1e-07   | 1    | U | K.RNPWSDDESKSESLEETEPVVIPR.D                           |
| <a href="#">2005</a>  | 1333 - 1341 | 539.2279  | 1076.4412 | 1076.4411 | 0.14   | 0 | 41    | 0.0005  | 1    | U | R.NPWSDDDESK.S                                         |
| <a href="#">10784</a> | 1333 - 1356 | 690.3226  | 2757.2615 | 2757.2617 | -0.084 | 1 | 46    | 0.0011  | 1    | U | R.NPWSDDDESKSESLEETEPVVIPR.D                           |
| <a href="#">10785</a> | 1333 - 1356 | 920.0944  | 2757.2615 | 2757.2617 | -0.071 | 1 | 60    | 9.7e-05 | 1    | U | R.NPWSDDDESKSESLEETEPVVIPR.D                           |
| <a href="#">10787</a> | 1333 - 1356 | 690.3252  | 2757.2717 | 2757.2617 | 3.64   | 1 | 43    | 0.00074 | 1    | U | R.NPWSDDDESKSESLEETEPVVIPR.D                           |
| <a href="#">10955</a> | 1333 - 1356 | 946.7501  | 2837.2284 | 2837.2280 | 0.15   | 1 | 43    | 0.0015  | 1    | U | R.NPWSDDDESKSESLEETEPVVIPR.D<br>+ Phospho (ST)         |
| <a href="#">6980</a>  | 1342 - 1356 | 567.2837  | 1698.8293 | 1698.8312 | -1.11  | 0 | 43    | 0.0053  | 1    | U | K.SESDLEETEPVVIPR.D                                    |
| <a href="#">6982</a>  | 1342 - 1356 | 850.4229  | 1698.8313 | 1698.8312 | 0.080  | 0 | 78    | 1.6e-06 | 1    | U | K.SESDLEETEPVVIPR.D                                    |
| <a href="#">7545</a>  | 1342 - 1356 | 890.4078  | 1778.8010 | 1778.7975 | 1.99   | 0 | 28    | 0.023   | 1    | U | K.SESDLEETEPVVIPR.D<br>+ Phospho (ST)                  |
| <a href="#">818</a>   | 1362 - 1369 | 449.7643  | 897.5141  | 897.5144  | -0.37  | 1 | 26    | 0.034   | 1    | U | R.RAAERPK.Y                                            |
| <a href="#">147</a>   | 1363 - 1369 | 371.7140  | 741.4133  | 741.4133  | 0.065  | 0 | 32    | 0.0026  | 1    | U | R.AAERPK.Y                                             |
| <a href="#">11992</a> | 1370 - 1396 | 1076.7355 | 3227.1848 | 3227.1858 | -0.32  | 0 | 73    | 4e-07   | 1    | U | K.YTFDFSEEDDDDDDDDDNDLLEELK.V                          |
| <a href="#">9953</a>  | 1397 - 1418 | 805.0323  | 2412.0751 | 2412.0734 | 0.71   | 1 | 33    | 0.0074  | 1    | U | K.VKASPIITNDGEDEFVPSDGLDK.D<br>+ Phospho (ST)          |
| <a href="#">9954</a>  | 1397 - 1418 | 805.0326  | 2412.0759 | 2412.0734 | 1.02   | 1 | 35    | 0.011   | 1    | U | K.VKASPIITNDGEDEFVPSDGLDK.D<br>+ Phospho (ST)          |
| <a href="#">12420</a> | 1397 - 1427 | 1146.5124 | 3436.5154 | 3436.5236 | -2.37  | 2 | 50    | 0.00041 | 1    | U | K.VKASPIITNDGEDEFVPSDGLDKDEYTFSPGK.S<br>+ Phospho (ST) |
| <a href="#">12421</a> | 1397 - 1427 | 1146.5134 | 3436.5185 | 3436.5236 | -1.47  | 2 | 78    | 1.3e-06 | 1    | U | K.VKASPIITNDGEDEFVPSDGLDKDEYTFSPGK.S<br>+ Phospho (ST) |
| <a href="#">12422</a> | 1397 - 1427 | 860.1370  | 3436.5188 | 3436.5236 | -1.39  | 2 | 50    | 0.00038 | 1    | U | K.VKASPIITNDGEDEFVPSDGLDKDEYTFSPGK.S<br>+ Phospho (ST) |
| <a href="#">12423</a> | 1397 - 1427 | 860.1374  | 3436.5206 | 3436.5236 | -0.86  | 2 | 51    | 0.00052 | 1    | U | K.VKASPIITNDGEDEFVPSDGLDKDEYTFSPGK.S<br>+ Phospho (ST) |
| <a href="#">12424</a> | 1397 - 1427 | 860.1383  | 3436.5242 | 3436.5236 | 0.19   | 2 | 38    | 0.01    | 1    | U | K.VKASPIITNDGEDEFVPSDGLDKDEYTFSPGK.S<br>+ Phospho (ST) |
| <a href="#">12425</a> | 1397 - 1427 | 860.1384  | 3436.5245 | 3436.5236 | 0.27   | 2 | 42    | 0.0036  | 1    | U | K.VKASPIITNDGEDEFVPSDGLDKDEYTFSPGK.S<br>+ Phospho (ST) |
| <a href="#">12426</a> | 1397 - 1427 | 860.1386  | 3436.5253 | 3436.5236 | 0.51   | 2 | 57    | 0.0003  | 1    | U | K.VKASPIITNDGEDEFVPSDGLDKDEYTFSPGK.S<br>+ Phospho (ST) |
| <a href="#">9160</a>  | 1399 - 1418 | 1053.4794 | 2104.9443 | 2104.9437 | 0.28   | 0 | 89    | 8.9e-08 | 1    | U | K.ASPITNDGEDEFVPSDGLDK.D                               |
| <a href="#">11738</a> | 1399 - 1427 | 783.3542  | 3129.3878 | 3129.3939 | -1.94  | 1 | 29    | 0.016   | 1    | U | K.ASPITNDGEDEFVPSDGLDKDEYTFSPGK.S                      |
| <a href="#">11739</a> | 1399 - 1427 | 1044.1377 | 3129.3914 | 3129.3939 | -0.80  | 1 | 39    | 0.0046  | 1    | U | K.ASPITNDGEDEFVPSDGLDKDEYTFSPGK.S                      |
| <a href="#">11740</a> | 1399 - 1427 | 1044.1379 | 3129.3920 | 3129.3939 | -0.60  | 1 | 52    | 0.00012 | 1    | U | K.ASPITNDGEDEFVPSDGLDKDEYTFSPGK.S                      |
| <a href="#">11742</a> | 1399 - 1427 | 1044.1387 | 3129.3943 | 3129.3939 | 0.15   | 1 | 52    | 0.00025 | 1    | U | K.ASPITNDGEDEFVPSDGLDKDEYTFSPGK.S                      |
| <a href="#">11746</a> | 1399 - 1427 | 783.3564  | 3129.3967 | 3129.3939 | 0.89   | 1 | 37    | 0.0062  | 1    | U | K.ASPITNDGEDEFVPSDGLDKDEYTFSPGK.S                      |
| <a href="#">11747</a> | 1399 - 1427 | 1044.1396 | 3129.3971 | 3129.3939 | 1.04   | 1 | 57    | 6e-05   | 1    | U | K.ASPITNDGEDEFVPSDGLDKDEYTFSPGK.S                      |
| <a href="#">11947</a> | 1399 - 1427 | 1070.7931 | 3209.3574 | 3209.3602 | -0.88  | 1 | 62    | 2.7e-05 | 1    | U | K.ASPITNDGEDEFVPSDGLDKDEYTFSPGK.S<br>+ Phospho (ST)    |
| <a href="#">11948</a> | 1399 - 1427 | 1070.7939 | 3209.3599 | 3209.3602 | -0.088 | 1 | 88    | 6.7e-08 | 1    | U | K.ASPITNDGEDEFVPSDGLDKDEYTFSPGK.S<br>+ Phospho (ST)    |
| <a href="#">11949</a> | 1399 - 1427 | 1070.7948 | 3209.3624 | 3209.3602 | 0.70   | 1 | 40    | 0.0035  | 1    | U | K.ASPITNDGEDEFVPSDGLDKDEYTFSPGK.S<br>+ Phospho (ST)    |
| <a href="#">1711</a>  | 1419 - 1427 | 522.2377  | 1042.4608 | 1042.4607 | 0.066  | 0 | 36    | 0.00084 | 1    | U | K.DEYTFSPGK.S                                          |
| <a href="#">8760</a>  | 1440 - 1456 | 990.4786  | 1978.9426 | 1978.9425 | 0.070  | 1 | 94    | 9e-09   | 1    | U | K.SQDFGNLFSFSPYSQK.S                                   |
| <a href="#">8761</a>  | 1440 - 1456 | 660.6550  | 1978.9431 | 1978.9425 | 0.33   | 1 | 24    | 0.028   | 1    | U | K.KSQDFGNLFSFSPYSQK.S                                  |
| <a href="#">8119</a>  | 1441 - 1456 | 926.4304  | 1850.8463 | 1850.8475 | -0.64  | 0 | 53    | 9.9e-06 | 1    | U | K.SQDFGNLFSFSPYSQK.S                                   |
| <a href="#">8120</a>  | 1441 - 1456 | 926.4307  | 1850.8468 | 1850.8475 | -0.38  | 0 | 91    | 4.9e-09 | 1    | U | K.SQDFGNLFSFSPYSQK.S                                   |
| <a href="#">8122</a>  | 1441 - 1456 | 926.4308  | 1850.8471 | 1850.8475 | -0.24  | 0 | 21    | 0.029   | 1    | U | K.SQDFGNLFSFSPYSQK.S                                   |
| <a href="#">8123</a>  | 1441 - 1456 | 617.9563  | 1850.8472 | 1850.8475 | -0.20  | 0 | 26    | 0.015   | 1    | U | K.SQDFGNLFSFSPYSQK.S                                   |
| <a href="#">8124</a>  | 1441 - 1456 | 926.4309  | 1850.8472 | 1850.8475 | -0.19  | 0 | 91    | 4.2e-09 | 1    | U | K.SQDFGNLFSFSPYSQK.S                                   |
| <a href="#">8125</a>  | 1441 - 1456 | 926.4310  | 1850.8475 | 1850.8475 | 0.0076 | 0 | 74    | 1.9e-07 | 1    | U | K.SQDFGNLFSFSPYSQK.S                                   |
| <a href="#">8126</a>  | 1441 - 1456 | 617.9565  | 1850.8476 | 1850.8475 | 0.0097 | 0 | 57    | 1.5e-05 | 1    | U | K.SQDFGNLFSFSPYSQK.S                                   |
| <a href="#">8128</a>  | 1441 - 1456 | 926.4312  | 1850.8479 | 1850.8475 | 0.20   | 0 | 78    | 9.7e-08 | 1    | U | K.SQDFGNLFSFSPYSQK.S                                   |
| <a href="#">8130</a>  | 1441 - 1456 | 926.4314  | 1850.8482 | 1850.8475 | 0.39   | 0 | 92    | 2.4e-09 | 1    | U | K.SQDFGNLFSFSPYSQK.S                                   |
| <a href="#">8131</a>  | 1441 - 1456 | 926.4315  | 1850.8485 | 1850.8475 | 0.53   | 0 | 57    | 5.8e-06 | 1    | U | K.SQDFGNLFSFSPYSQK.S                                   |
| <a href="#">8132</a>  | 1441 - 1456 | 926.4316  | 1850.8485 | 1850.8475 | 0.55   | 0 | 78    | 7.1e-08 | 1    | U | K.SQDFGNLFSFSPYSQK.S                                   |
| <a href="#">8133</a>  | 1441 - 1456 | 926.4316  | 1850.8486 | 1850.8475 | 0.59   | 0 | 66    | 3.3e-06 | 1    | U | K.SQDFGNLFSFSPYSQK.S                                   |
| <a href="#">8559</a>  | 1441 - 1456 | 966.4132  | 1930.8118 | 1930.8139 | -1.07  | 0 | 66    | 2.6e-06 | 1    | U | K.SQDFGNLFSFSPYSQK.S<br>+ Phospho (ST)                 |
| <a href="#">8560</a>  | 1441 - 1456 | 966.4138  | 1930.8131 | 1930.8139 | -0.38  | 0 | 52    | 2.9e-05 | 1    | U | K.SQDFGNLFSFSPYSQK.S<br>+ Phospho (ST)                 |
| <a href="#">10836</a> | 1457 - 1482 | 932.4096  | 2794.2069 | 2794.2093 | -0.87  | 1 | 73    | 8.2e-07 | 1    | U | K.SEDDSAKFDSNEEDSASVFSPSFGLK.Q                         |
| <a href="#">10837</a> | 1457 - 1482 | 932.4097  | 2794.2072 | 2794.2093 | -0.76  | 1 | 59    | 1.9e-05 | 1    | U | K.SEDDSAKFDSNEEDSASVFSPSFGLK.Q                         |
| <a href="#">10839</a> | 1457 - 1482 | 932.4101  | 2794.2084 | 2794.2093 | -0.34  | 1 | 35    | 0.003   | 1    | U | K.SEDDSAKFDSNEEDSASVFSPSFGLK.Q                         |
| <a href="#">10840</a> | 1457 - 1482 | 932.4101  | 2794.2084 | 2794.2093 | -0.34  | 1 | 82    | 1.7e-07 | 1    | U | K.SEDDSAKFDSNEEDSASVFSPSFGLK.Q                         |
| <a href="#">10841</a> | 1457 - 1482 | 932.4102  | 2794.2089 | 2794.2093 | -0.17  | 1 | 59    | 2e-05   | 1    | U | K.SEDDSAKFDSNEEDSASVFSPSFGLK.Q                         |
| <a href="#">10842</a> | 1457 - 1482 | 932.4104  | 2794.2092 | 2794.2093 | -0.040 | 1 | 47    | 0.00026 | 1    | U | K.SEDDSAKFDSNEEDSASVFSPSFGLK.Q                         |
| <a href="#">10843</a> | 1457 - 1482 | 932.4104  | 2794.2094 | 2794.2093 | 0.024  | 1 | 63    | 6.5e-06 | 1    | U | K.SEDDSAKFDSNEEDSASVFSPSFGLK.Q                         |
| <a href="#">11005</a> | 1457 - 1482 | 959.0658  | 2874.1756 | 2874.1757 | -0.020 | 1 | 47    | 0.00013 | 1    | U | K.SEDDSAKFDSNEEDSASVFSPSFGLK.Q<br>+ Phospho (ST)       |
| <a href="#">11006</a> | 1457 - 1482 | 959.0659  | 2874.1760 | 2874.1757 | 0.11   | 1 | 31    | 0.0072  | 1    | U | K.SEDDSAKFDSNEEDSASVFSPSFGLK.Q<br>+ Phospho (ST)       |
| <a href="#">11007</a> | 1457 - 1482 | 959.0659  | 2874.1760 | 2874.1757 | 0.11   | 1 | 41    | 0.0015  | 1    | U | K.SEDDSAKFDSNEEDSASVFSPSFGLK.Q<br>+ Phospho (ST)       |
| <a href="#">11008</a> | 1457 - 1482 | 959.0665  | 2874.1778 | 2874.1757 | 0.74   | 1 | 61    | 1.4e-05 | 1    | U | K.SEDDSAKFDSNEEDSASVFSPSFGLK.Q<br>+ Phospho (ST)       |
| <a href="#">9009</a>  | 1464 - 1482 | 1031.9636 | 2061.9126 | 2061.9167 | -1.99  | 0 | 51    | 0.00013 | 1    | U | K.FDSNEEDSASVFSPSFGLK.Q                                |
| <a href="#">9010</a>  | 1464 - 1482 | 1031.9641 | 2061.9136 | 2061.9167 | -1.53  | 0 | 109   | 8.1e-10 | 1    | U | K.FDSNEEDSASVFSPSFGLK.Q                                |
| <a href="#">9012</a>  | 1464 - 1482 | 1031.9644 | 2061.9143 | 2061.9167 | -1.17  | 0 | 39    | 0.00096 | 1    | U | K.FDSNEEDSASVFSPSFGLK.Q                                |
| <a href="#">9014</a>  | 1464 - 1482 | 1031.9652 | 2061.9158 | 2061.9167 | -0.47  | 0 | 76    | 3.2e-07 | 1    | U | K.FDSNEEDSASVFSPSFGLK.Q                                |
| <a href="#">9015</a>  | 1464 - 1482 | 1031.9653 | 2061.9160 | 2061.9167 | -0.33  | 0 | 61    | 9.9e-06 | 1    | U | K.FDSNEEDSASVFSPSFGLK.Q                                |
| <a href="#">9016</a>  | 1464 - 1482 | 1031.9655 | 2061.9165 | 2061.9167 | -0.12  | 0 | 100   | 8.3e-10 | 1    | U | K.FDSNEEDSASVFSPSFGLK.Q                                |
| <a href="#">9017</a>  | 1464 - 1482 | 688.3128  | 2061.9167 | 2061.9167 | -0.034 | 0 | 52    | 0.00026 | 1    | U | K.FDSNEEDSASVFSPSFGLK.Q                                |
| <a href="#">9018</a>  | 1464 - 1482 | 688.3129  | 2061.9169 | 2061.9167 | 0.097  | 0 | 30    | 0.017   | 1    | U | K.FDSNEEDSASVFSPSFGLK.Q                                |
| <a href="#">9270</a>  | 1464 - 1482 | 1071.9480 | 2141.8813 | 2141.8831 | -0.80  | 0 | 72    | 1.2e-06 | 1    | U | K.FDSNEEDSASVFSPSFGLK.Q<br>+ Phospho (ST)              |
| <a href="#">9271</a>  | 1464 - 1482 | 1071.9480 | 2141.8814 | 2141.8831 | -0.79  | 0 | 75    | 1.2e-06 | 1    | U | K.FDSNEEDSASVFSPSFGLK.Q<br>+ Phospho (ST)              |
| <a href="#">9273</a>  | 1464 - 1482 | 1071.9482 | 2141.8818 | 2141.8831 | -0.56  | 0 | 67    | 2.9e-06 | 1    | U | K.FDSNEEDSASVFSPSFGLK.Q<br>+ Phospho (ST)              |
| <a href="#">9274</a>  | 1464 - 1482 | 1071.9486 | 2141.8826 | 2141.8831 | -0.22  | 0 | 80    | 6.9e-08 | 1    | U | K.FDSNEEDSASVFSPSFGLK.Q                                |

| Query                | Start - End | Observed  | Mr (expt) | Mr (calc) | ppm    | M | Score | Expect  | Rank | U | Peptide                                   |
|----------------------|-------------|-----------|-----------|-----------|--------|---|-------|---------|------|---|-------------------------------------------|
| <a href="#">9275</a> | 1464 - 1482 | 1071.9488 | 2141.8831 | 2141.8831 | 0.0051 | 0 | 65    | 2.7e-06 | 1    | U | K.FDSNEEDSASVFSPSFGLK.Q<br>+ Phospho (ST) |
| <a href="#">9276</a> | 1464 - 1482 | 1071.9488 | 2141.8831 | 2141.8831 | 0.0051 | 0 | 63    | 2.1e-06 | 1    | U | K.FDSNEEDSASVFSPSFGLK.Q<br>+ Phospho (ST) |
| <a href="#">9277</a> | 1464 - 1482 | 714.9684  | 2141.8832 | 2141.8831 | 0.077  | 0 | 45    | 0.00016 | 1    | U | K.FDSNEEDSASVFSPSFGLK.Q<br>+ Phospho (ST) |
| <a href="#">9278</a> | 1464 - 1482 | 714.9684  | 2141.8832 | 2141.8831 | 0.077  | 0 | 27    | 0.026   | 1    | U | K.FDSNEEDSASVFSPSFGLK.Q<br>+ Phospho (ST) |
| <a href="#">9279</a> | 1464 - 1482 | 1071.9489 | 2141.8833 | 2141.8831 | 0.12   | 0 | 64    | 2.4e-06 | 1    | U | K.FDSNEEDSASVFSPSFGLK.Q<br>+ Phospho (ST) |
| <a href="#">9280</a> | 1464 - 1482 | 714.9684  | 2141.8834 | 2141.8831 | 0.18   | 0 | 30    | 0.0037  | 1    | U | K.FDSNEEDSASVFSPSFGLK.Q<br>+ Phospho (ST) |
| <a href="#">9281</a> | 1464 - 1482 | 714.9689  | 2141.8849 | 2141.8831 | 0.86   | 0 | 32    | 0.0064  | 1    | U | K.FDSNEEDSASVFSPSFGLK.Q<br>+ Phospho (ST) |
| <a href="#">9283</a> | 1464 - 1482 | 714.9690  | 2141.8853 | 2141.8831 | 1.03   | 0 | 20    | 0.013   | 1    | U | K.FDSNEEDSASVFSPSFGLK.Q<br>+ Phospho (ST) |
| <a href="#">9284</a> | 1464 - 1482 | 714.9692  | 2141.8857 | 2141.8831 | 1.21   | 0 | 15    | 0.036   | 1    | U | K.FDSNEEDSASVFSPSFGLK.Q<br>+ Phospho (ST) |
| <a href="#">839</a>  | 1483 - 1490 | 451.7506  | 901.4867  | 901.4869  | -0.25  | 1 | 41    | 0.0044  | 1    | U | K.QTDKVPK.T                               |
| <a href="#">4305</a> | 1496 - 1508 | 684.8958  | 1367.7771 | 1367.7773 | -0.091 | 1 | 59    | 2.6e-05 | 1    | U | K.KGKPSDTPVKPK.R                          |
| <a href="#">3311</a> | 1497 - 1508 | 414.2347  | 1239.6823 | 1239.6823 | -0.020 | 0 | 50    | 0.00029 | 1    | U | K.KGKPSDTPVKPK.R                          |
| <a href="#">3315</a> | 1497 - 1508 | 620.8492  | 1239.6839 | 1239.6823 | 1.33   | 0 | 47    | 9.5e-05 | 1    | U | K.KGKPSDTPVKPK.R                          |
| <a href="#">3316</a> | 1497 - 1508 | 414.2357  | 1239.6853 | 1239.6823 | 2.45   | 0 | 30    | 0.0093  | 1    | U | K.KGKPSDTPVKPK.R                          |
| <a href="#">8510</a> | 1515 - 1532 | 640.9893  | 1919.9462 | 1919.9476 | -0.75  | 1 | 69    | 2.4e-06 | 1    | U | K.KVVEAVNSDSEFGIPK.K                      |
| <a href="#">8511</a> | 1515 - 1532 | 960.9810  | 1919.9474 | 1919.9476 | -0.14  | 1 | 93    | 2e-09   | 1    | U | K.KVVEAVNSDSEFGIPK.K                      |
| <a href="#">8512</a> | 1515 - 1532 | 960.9812  | 1919.9479 | 1919.9476 | 0.12   | 1 | 85    | 1.1e-08 | 1    | U | K.KVVEAVNSDSEFGIPK.K                      |
| <a href="#">8796</a> | 1515 - 1532 | 1000.9638 | 1999.9131 | 1999.9140 | -0.40  | 1 | 74    | 1.3e-06 | 1    | U | K.KVVEAVNSDSEFGIPK.K<br>+ Phospho (ST)    |
| <a href="#">8797</a> | 1515 - 1532 | 667.6450  | 1999.9132 | 1999.9140 | -0.38  | 1 | 26    | 0.013   | 1    | U | K.KVVEAVNSDSEFGIPK.K<br>+ Phospho (ST)    |
| <a href="#">8798</a> | 1515 - 1532 | 667.6450  | 1999.9133 | 1999.9140 | -0.35  | 1 | 29    | 0.017   | 1    | U | K.KVVEAVNSDSEFGIPK.K<br>+ Phospho (ST)    |
| <a href="#">8799</a> | 1515 - 1532 | 1000.9639 | 1999.9133 | 1999.9140 | -0.34  | 1 | 69    | 7e-06   | 1    | U | K.KVVEAVNSDSEFGIPK.K<br>+ Phospho (ST)    |
| <a href="#">8800</a> | 1515 - 1532 | 1000.9640 | 1999.9134 | 1999.9140 | -0.25  | 1 | 42    | 0.00028 | 1    | U | K.KVVEAVNSDSEFGIPK.K<br>+ Phospho (ST)    |
| <a href="#">8802</a> | 1515 - 1532 | 667.6454  | 1999.9144 | 1999.9140 | 0.21   | 1 | 39    | 0.0012  | 1    | U | K.KVVEAVNSDSEFGIPK.K<br>+ Phospho (ST)    |
| <a href="#">8803</a> | 1515 - 1532 | 1000.9646 | 1999.9146 | 1999.9140 | 0.31   | 1 | 59    | 7e-06   | 1    | U | K.KVVEAVNSDSEFGIPK.K<br>+ Phospho (ST)    |
| <a href="#">7665</a> | 1516 - 1532 | 896.9336  | 1791.8527 | 1791.8527 | 0.040  | 0 | 77    | 1.2e-07 | 1    | U | K.VVEAVNSDSEFGIPK.K                       |
| <a href="#">7666</a> | 1516 - 1532 | 598.2916  | 1791.8529 | 1791.8527 | 0.15   | 0 | 37    | 0.00055 | 1    | U | K.VVEAVNSDSEFGIPK.K                       |
| <a href="#">7667</a> | 1516 - 1532 | 896.9340  | 1791.8534 | 1791.8527 | 0.42   | 0 | 58    | 4.6e-06 | 1    | U | K.VVEAVNSDSEFGIPK.K                       |
| <a href="#">7668</a> | 1516 - 1532 | 896.9343  | 1791.8541 | 1791.8527 | 0.81   | 0 | 51    | 1.7e-05 | 1    | U | K.VVEAVNSDSEFGIPK.K                       |
| <a href="#">7669</a> | 1516 - 1532 | 896.9350  | 1791.8555 | 1791.8527 | 1.59   | 0 | 40    | 0.00024 | 1    | U | K.VVEAVNSDSEFGIPK.K                       |
| <a href="#">7671</a> | 1516 - 1532 | 896.9364  | 1791.8583 | 1791.8527 | 3.14   | 0 | 45    | 0.0011  | 1    | U | K.VVEAVNSDSEFGIPK.K                       |
| <a href="#">8232</a> | 1516 - 1532 | 936.9158  | 1871.8171 | 1871.8190 | -0.99  | 0 | 64    | 9.4e-07 | 1    | U | K.VVEAVNSDSEFGIPK.K<br>+ Phospho (ST)     |
| <a href="#">8233</a> | 1516 - 1532 | 936.9159  | 1871.8173 | 1871.8190 | -0.90  | 0 | 56    | 9.9e-06 | 1    | U | K.VVEAVNSDSEFGIPK.K<br>+ Phospho (ST)     |
| <a href="#">8234</a> | 1516 - 1532 | 936.9168  | 1871.8190 | 1871.8190 | 0.015  | 0 | 73    | 3.1e-07 | 1    | U | K.VVEAVNSDSEFGIPK.K<br>+ Phospho (ST)     |
| <a href="#">8235</a> | 1516 - 1532 | 936.9168  | 1871.8191 | 1871.8190 | 0.068  | 0 | 81    | 7.7e-08 | 1    | U | K.VVEAVNSDSEFGIPK.K<br>+ Phospho (ST)     |
| <a href="#">8236</a> | 1516 - 1532 | 936.9170  | 1871.8194 | 1871.8190 | 0.21   | 0 | 69    | 3.8e-07 | 1    | U | K.VVEAVNSDSEFGIPK.K<br>+ Phospho (ST)     |
| <a href="#">7880</a> | 1547 - 1562 | 606.2587  | 1815.7543 | 1815.7537 | 0.36   | 2 | 53    | 0.00058 | 1    | U | K.RKASGENEGDYNPGR.K<br>+ Phospho (ST)     |
| <a href="#">6105</a> | 1548 - 1562 | 527.5693  | 1579.6861 | 1579.6862 | -0.074 | 1 | 29    | 0.016   | 1    | U | R.KASGENEGDYNPGR.K                        |
| <a href="#">6107</a> | 1548 - 1562 | 527.5694  | 1579.6864 | 1579.6862 | 0.078  | 1 | 52    | 0.00017 | 1    | U | R.KASGENEGDYNPGR.K                        |
| <a href="#">6108</a> | 1548 - 1562 | 790.8505  | 1579.6864 | 1579.6862 | 0.088  | 1 | 52    | 8.2e-05 | 1    | U | R.KASGENEGDYNPGR.K                        |
| <a href="#">6645</a> | 1548 - 1562 | 554.2248  | 1659.6525 | 1659.6526 | -0.055 | 1 | 38    | 0.0065  | 1    | U | R.KASGENEGDYNPGR.K<br>+ Phospho (ST)      |
| <a href="#">6646</a> | 1548 - 1562 | 830.8337  | 1659.6529 | 1659.6526 | 0.20   | 1 | 61    | 6.2e-06 | 1    | U | R.KASGENEGDYNPGR.K<br>+ Phospho (ST)      |
| <a href="#">6647</a> | 1548 - 1562 | 554.2250  | 1659.6531 | 1659.6526 | 0.31   | 1 | 22    | 0.042   | 1    | U | R.KASGENEGDYNPGR.K<br>+ Phospho (ST)      |
| <a href="#">6648</a> | 1548 - 1562 | 554.2254  | 1659.6544 | 1659.6526 | 1.08   | 1 | 31    | 0.0053  | 1    | U | R.KASGENEGDYNPGR.K<br>+ Phospho (ST)      |
| <a href="#">7278</a> | 1548 - 1562 | 870.8170  | 1739.6195 | 1739.6189 | 0.33   | 1 | 22    | 0.044   | 1    | U | R.KASGENEGDYNPGR.K<br>+ 2 Phospho (ST)    |
| <a href="#">7279</a> | 1548 - 1562 | 870.8174  | 1739.6202 | 1739.6189 | 0.74   | 1 | 19    | 0.025   | 1    | U | R.KASGENEGDYNPGR.K<br>+ 2 Phospho (ST)    |
| <a href="#">7037</a> | 1548 - 1563 | 570.2675  | 1707.7807 | 1707.7812 | -0.28  | 2 | 54    | 5.8e-05 | 1    | U | R.KASGENEGDYNPGRK.T                       |
| <a href="#">7039</a> | 1548 - 1563 | 854.8985  | 1707.7824 | 1707.7812 | 0.71   | 2 | 52    | 7.8e-05 | 1    | U | R.KASGENEGDYNPGRK.T                       |
| <a href="#">7609</a> | 1548 - 1563 | 596.9233  | 1787.7480 | 1787.7475 | 0.27   | 2 | 37    | 0.00099 | 1    | U | R.KASGENEGDYNPGRK.T<br>+ Phospho (ST)     |
| <a href="#">4870</a> | 1549 - 1562 | 726.8008  | 1451.5871 | 1451.5913 | -2.90  | 0 | 60    | 1.8e-05 | 1    | U | K.ASGSENEGDNPGR.K                         |
| <a href="#">4871</a> | 1549 - 1562 | 726.8028  | 1451.5911 | 1451.5913 | -0.11  | 0 | 46    | 0.00014 | 1    | U | K.ASGSENEGDNPGR.K                         |
| <a href="#">4872</a> | 1549 - 1562 | 726.8029  | 1451.5912 | 1451.5913 | -0.031 | 0 | 53    | 3.5e-05 | 1    | U | K.ASGSENEGDNPGR.K                         |
| <a href="#">4873</a> | 1549 - 1562 | 484.8712  | 1451.5917 | 1451.5913 | 0.25   | 0 | 42    | 0.0011  | 1    | U | K.ASGSENEGDNPGR.K                         |
| <a href="#">4874</a> | 1549 - 1562 | 726.8032  | 1451.5917 | 1451.5913 | 0.31   | 0 | 60    | 2.2e-05 | 1    | U | K.ASGSENEGDNPGR.K                         |
| <a href="#">4875</a> | 1549 - 1562 | 726.8032  | 1451.5918 | 1451.5913 | 0.35   | 0 | 37    | 0.0061  | 1    | U | K.ASGSENEGDNPGR.K                         |
| <a href="#">4876</a> | 1549 - 1562 | 484.8714  | 1451.5925 | 1451.5913 | 0.85   | 0 | 30    | 0.014   | 1    | U | K.ASGSENEGDNPGR.K                         |
| <a href="#">4877</a> | 1549 - 1562 | 726.8041  | 1451.5936 | 1451.5913 | 1.57   | 0 | 42    | 0.0013  | 1    | U | K.ASGSENEGDNPGR.K                         |
| <a href="#">5700</a> | 1549 - 1562 | 766.7839  | 1531.5532 | 1531.5576 | -2.90  | 0 | 56    | 8.1e-05 | 1    | U | K.ASGSENEGDNPGR.K<br>+ Phospho (ST)       |
| <a href="#">5701</a> | 1549 - 1562 | 766.7854  | 1531.5562 | 1531.5576 | -0.92  | 0 | 67    | 6.9e-06 | 1    | U | K.ASGSENEGDNPGR.K<br>+ Phospho (ST)       |
| <a href="#">5702</a> | 1549 - 1562 | 766.7862  | 1531.5579 | 1531.5576 | 0.20   | 0 | 35    | 0.0058  | 1    | U | K.ASGSENEGDNPGR.K<br>+ Phospho (ST)       |
| <a href="#">5703</a> | 1549 - 1562 | 766.7862  | 1531.5579 | 1531.5576 | 0.20   | 0 | 55    | 0.00011 | 1    | U | K.ASGSENEGDNPGR.K<br>+ Phospho (ST)       |
| <a href="#">6106</a> | 1549 - 1563 | 790.8504  | 1579.6863 | 1579.6862 | 0.025  | 1 | 71    | 3.7e-06 | 1    | U | K.ASGSENEGDNPGRK.T                        |

| Query                 | Start - End | Observed  | Mr(expt)  | Mr(calc)  | ppm     | M | Score | Expect  | Rank | U | Peptide                                  |
|-----------------------|-------------|-----------|-----------|-----------|---------|---|-------|---------|------|---|------------------------------------------|
| <a href="#">6649</a>  | 1549 - 1563 | 830.8345  | 1659.6544 | 1659.6526 | 1.11    | 1 | 33    | 0.019   | 1    | U | K.ASGSENEGDNYPGRK.T<br>+ Phospho (ST)    |
| <a href="#">11158</a> | 1574 - 1599 | 979.7967  | 2936.3683 | 2936.3716 | -1.13   | 1 | 24    | 0.021   | 1    | U | K.KTSFDQSDVDIFPSDFPTEPPSLPR.T            |
| <a href="#">11162</a> | 1574 - 1599 | 588.2813  | 2936.3701 | 2936.3716 | -0.53   | 1 | 30    | 0.028   | 1    | U | K.KTSFDQSDVDIFPSDFPTEPPSLPR.T            |
| <a href="#">11163</a> | 1574 - 1599 | 979.7974  | 2936.3705 | 2936.3716 | -0.38   | 1 | 45    | 0.00096 | 1    | U | K.KTSFDQSDVDIFPSDFPTEPPSLPR.T            |
| <a href="#">11164</a> | 1574 - 1599 | 979.7975  | 2936.3707 | 2936.3716 | -0.32   | 1 | 29    | 0.048   | 1    | U | K.KTSFDQSDVDIFPSDFPTEPPSLPR.T            |
| <a href="#">11167</a> | 1574 - 1599 | 735.1001  | 2936.3714 | 2936.3716 | -0.086  | 1 | 32    | 0.019   | 1    | U | K.KTSFDQSDVDIFPSDFPTEPPSLPR.T            |
| <a href="#">11168</a> | 1574 - 1599 | 979.7978  | 2936.3716 | 2936.3716 | -0.0089 | 1 | 49    | 0.00057 | 1    | U | K.KTSFDQSDVDIFPSDFPTEPPSLPR.T            |
| <a href="#">11169</a> | 1574 - 1599 | 979.7978  | 2936.3716 | 2936.3716 | 0.0014  | 1 | 41    | 0.00086 | 1    | U | K.KTSFDQSDVDIFPSDFPTEPPSLPR.T            |
| <a href="#">11170</a> | 1574 - 1599 | 588.2816  | 2936.3719 | 2936.3716 | 0.082   | 1 | 32    | 0.019   | 1    | U | K.KTSFDQSDVDIFPSDFPTEPPSLPR.T            |
| <a href="#">11173</a> | 1574 - 1599 | 979.7981  | 2936.3725 | 2936.3716 | 0.31    | 1 | 32    | 0.012   | 1    | U | K.KTSFDQSDVDIFPSDFPTEPPSLPR.T            |
| <a href="#">11174</a> | 1574 - 1599 | 979.7984  | 2936.3733 | 2936.3716 | 0.55    | 1 | 31    | 0.012   | 1    | U | K.KTSFDQSDVDIFPSDFPTEPPSLPR.T            |
| <a href="#">10874</a> | 1575 - 1599 | 937.0986  | 2808.2741 | 2808.2767 | -0.91   | 0 | 38    | 0.0014  | 1    | U | K.TSFDQSDVDIFPSDFPTEPPSLPR.T             |
| <a href="#">10875</a> | 1575 - 1599 | 937.0991  | 2808.2754 | 2808.2767 | -0.44   | 0 | 48    | 0.00031 | 1    | U | K.TSFDQSDVDIFPSDFPTEPPSLPR.T             |
| <a href="#">10877</a> | 1575 - 1599 | 937.0993  | 2808.2760 | 2808.2767 | -0.25   | 0 | 28    | 0.011   | 1    | U | K.TSFDQSDVDIFPSDFPTEPPSLPR.T             |
| <a href="#">10878</a> | 1575 - 1599 | 937.0994  | 2808.2765 | 2808.2767 | -0.064  | 0 | 48    | 0.00011 | 1    | U | K.TSFDQSDVDIFPSDFPTEPPSLPR.T             |
| <a href="#">10880</a> | 1575 - 1599 | 937.0996  | 2808.2771 | 2808.2767 | 0.14    | 0 | 26    | 0.015   | 1    | U | K.TSFDQSDVDIFPSDFPTEPPSLPR.T             |
| <a href="#">10883</a> | 1575 - 1599 | 937.1000  | 2808.2782 | 2808.2767 | 0.53    | 0 | 45    | 0.00024 | 1    | U | K.TSFDQSDVDIFPSDFPTEPPSLPR.T             |
| <a href="#">9376</a>  | 1609 - 1626 | 1086.9145 | 2171.8145 | 2171.8154 | -0.41   | 0 | 18    | 0.041   | 1    | U | K.YFAESDEEEDDVFAMFN.-                    |
| <a href="#">9379</a>  | 1609 - 1626 | 1086.9148 | 2171.8150 | 2171.8154 | -0.18   | 0 | 37    | 0.0004  | 1    | U | K.YFAESDEEEDDVFAMFN.-                    |
| <a href="#">9380</a>  | 1609 - 1626 | 724.9456  | 2171.8151 | 2171.8154 | -0.11   | 0 | 45    | 0.00052 | 1    | U | K.YFAESDEEEDDVFAMFN.-                    |
| <a href="#">9428</a>  | 1609 - 1626 | 1094.9116 | 2187.8086 | 2187.8103 | -0.78   | 0 | 28    | 0.0035  | 1    | U | K.YFAESDEEEDDVFAMFN.-<br>+ Oxidation (M) |
| <a href="#">9429</a>  | 1609 - 1626 | 1094.9122 | 2187.8098 | 2187.8103 | -0.20   | 0 | 57    | 1.1e-05 | 1    | U | K.YFAESDEEEDDVFAMFN.-<br>+ Oxidation (M) |
| <a href="#">9430</a>  | 1609 - 1626 | 1094.9123 | 2187.8101 | 2187.8103 | -0.084  | 0 | 38    | 0.00039 | 1    | U | K.YFAESDEEEDDVFAMFN.-<br>+ Oxidation (M) |
| <a href="#">9432</a>  | 1609 - 1626 | 1094.9129 | 2187.8113 | 2187.8103 | 0.46    | 0 | 30    | 0.0045  | 1    | U | K.YFAESDEEEDDVFAMFN.-<br>+ Oxidation (M) |
| <a href="#">9433</a>  | 1609 - 1626 | 1094.9130 | 2187.8115 | 2187.8103 | 0.56    | 0 | 56    | 6.3e-06 | 1    | U | K.YFAESDEEEDDVFAMFN.-<br>+ Oxidation (M) |
| <a href="#">9434</a>  | 1609 - 1626 | 1094.9133 | 2187.8120 | 2187.8103 | 0.80    | 0 | 46    | 5.1e-05 | 1    | U | K.YFAESDEEEDDVFAMFN.-<br>+ Oxidation (M) |

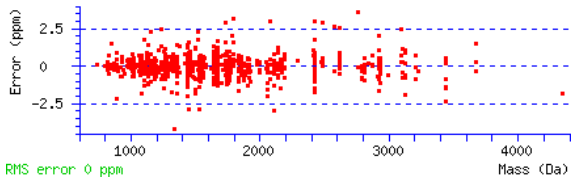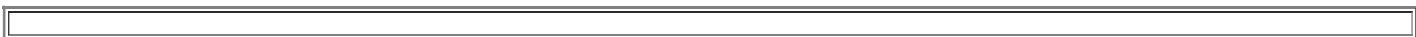

Supplement: 41467_2023_44089_MOESM8_ESM.pdf [file 41467_2023_44089_MOESM8_ESM.pdf]
