# Supplementary material for: ERK2-topoisomerase II regulatory axis is important for gene activation in immediate early genes
Source: Springer Nature journal article supplement (doi:10.1038/s41467-023-44089-y), 2023-12-14

# Mascot Search Results

User : r-nakagawa  
Email :  
Search title : SN221365\_deTOP2B\_Erk1ml\_lul\_Node:2  
MS data file : File Name: Z:\SN221365\_deTOP2B\_Erk1ml\_lul.raw; File Path: :File Time: 3/1/2023 3:35:46 PM; File Size: 351320790 [Byte]  
Database 1 : cRAP STRAV\_protein6\_20230313 (118 sequences: 39090 residues)  
Database 2 : Original\_21\_21\_TOP2B\_1-566\_20210618 (1 sequences: 589 residues)  
Database 3 : Uniprot\_Proteome\_E.coli\_K12\_Proteome\_E.coli\_K12\_UP000000625\_2022\_01 (4448 sequences: 1358110 residues)  
Timestamp : 13 Sep 2023 at 00:28:03 GMT  
Enzyme : Trypsin  
Fixed modifications : Acetyl (Protein N-term), Oxidation (M), Phospho (ST), Phospho (Y)  
Variable modifications :  
Mass values : Monoisotopic  
Protein Mass : Unrestricted  
Peptide Mass Tolerance : ± 10 ppm  
Fragment Mass Tolerance : ± 0.8 Da  
Max Missed Cleavages : 3  
Instrument type : Default  
Number of queries : 13219  
Protein hits : 2:::TOP2B\_1-566  
1:::sp|K1C10\_HUMAN|  
1:::sp|K2C1\_HUMAN|  
1:::sp|K22E\_HUMAN|  
1:::sp|K1G9\_HUMAN|  
1:::sp|HBB\_HUMAN|  
1:::sp|K1C15\_SHEEP|  
3:::P0AA25\_THIO\_ECOLI|  
1:::sp|HBA\_HUMAN|  
1:::sp|LRYP\_PIG|  
1:::sp|ALBU\_BOVIN|  
3:::P76298\_FLHA\_ECOLI|  
1:::sp|KRHB4\_HUMAN|  
1:::sp|CAS9\_BOVIN|  
1:::sp|RS27A\_HUMAN|  
3:::P0AD96\_LIVJ\_ECOLI|  
3:::P7721\_CUSC\_ECOLI|  
3:::P75882\_GFCO\_ECOLI|  
3:::006065\_ATOC\_ECOLI|  
3:::P62601\_TREFF\_ECOLI|  
3:::Q0A23761A0A1H2C767\_ECOLI|  
3:::P32191ALSA\_ECOLI|  
3:::P76092\_YNBC\_ECOLI|  
3:::Q46857\_DKGA\_ECOLI|  
3:::P0ARHO\_F TSA\_ECOLI|  
3:::P12996\_BIOR\_ECOLI|  
3:::P39359\_YJHG\_ECOLI|  
3:::P21361\_YEIB\_ECOLI|  
3:::P142008\_ARFB\_ECOLI|  
3:::P12422\_WCAK\_ECOLI|  
3:::P46891\_COF\_ECOLI|  
1:::sp|CYC\_HUMAN|  
3:::P0A759\_NAGB\_ECOLI|  
3:::P0C018\_RL18\_ECOLI|  
3:::P0A1V0\_RSS2\_ECOLI|  
3:::P08333\_GNTR\_ECOLI|  
3:::P32053\_INIA\_ECOLI|  
3:::P06149\_DLD\_ECOLI|  
3:::P0AD18\_YGIM\_ECOLI|  
3:::P63201\_GADW\_ECOLI|  
3:::P22106\_ASNB\_ECOLI|  
3:::P15029\_FECO\_ECOLI|  
3:::P21393\_CASQ\_ECOLI|  
3:::P16104\_RLHA\_ECOLI|  
3:::P21393\_RECJ\_ECOLI|  
3:::P38035\_RTOR\_ECOLI|  
3:::P80645\_SSDU\_ECOLI|  
3:::P0AAJ8\_HYBA\_ECOLI|  
3:::P77380\_BORD\_ECOLI|  
3:::Q46901\_CSAO\_ECOLI|  
3:::P0A158\_RL18\_ECOLI|  
3:::P45522\_KEFB\_ECOLI|  
3:::P77337\_YDIS\_ECOLI|  
3:::P0A1E9\_MALE\_ECOLI|  
3:::P33668\_YBBC\_ECOLI|  
3:::P02921\_MELB\_ECOLI|  
3:::P64822\_YHVD\_ECOLI|  
3:::P20966\_PTFB\_ECOLI|  
3:::P08333\_CPDG\_ECOLI|  
3:::P12999\_BIOC\_ECOLI|  
3:::P0A996\_SECE\_ECOLI|  
3:::P14900\_MURD\_ECOLI|  
3:::P28249\_ASMA\_ECOLI|  
3:::P0ADF6\_EDD\_ECOLI|  
3:::P0AB65\_MRDA\_ECOLI|  
3:::P0A143\_KFKK\_ECOLI|  
3:::P43329\_HRPA\_ECOLI|  
3:::P0AGD7\_SRP54\_ECOLI|  
3:::P0AFA2\_NARX\_ECOLI|  
3:::P0AGLO\_GLPR\_ECOLI|  
3:::P33136\_OPGG\_ECOLI|  
3:::P0A1R9\_RSTI\_ECOLI|  
3:::P25771\_IIGB\_ECOLI|  
1:::sp|UB2E\_HUMAN|  
3:::P75830\_MACA\_ECOLI|  
3:::P17169\_GLMS\_ECOLI|  
3:::P0AAH4\_SAPD\_ECOLI|  
3:::P76015\_DHAQ\_ECOLI|  
3:::P77765\_RNAAM\_ECOLI|  
3:::Q0DFV4\_YMDE\_ECOLI|  
3:::P77337\_KFKK\_ECOLI|  
3:::P16869\_FHUJ\_ECOLI|  
3:::P0A9M0\_LON\_ECOLI|  
3:::P09831\_GLTR\_ECOLI|  
3:::P0A1V3\_RS3\_ECOLI|  
3:::P02918\_PBPB\_ECOLI|  
3:::P37013\_NORR\_ECOLI|  
3:::P114292\_HYFR\_ECOLI|  
3:::P38134\_ETK\_ECOLI|  
3:::P55140\_YGCG\_ECOLI|  
3:::P00582\_DPOT\_ECOLI|  
3:::P76352\_YFEO\_ECOLI|  
3:::P0AGF6\_TDCB\_ECOLI|  
TOP2B\_1-566  
sp|K1C10\_HUMAN|  
sp|K2C1\_HUMAN|  
sp|K22E\_HUMAN|  
sp|K1G9\_HUMAN|  
sp|HBB\_HUMAN|  
sp|K1C15\_SHEEP|  
Thioredoxin I OS=Escherichia coli (strain K12) OX=83333 GN=trxA PE=1 SV=2  
sp|HBA\_HUMAN|  
sp|LRYP\_PIG|  
sp|ALBU\_BOVIN|  
Flagellar biosynthesis protein FlhA OS=Escherichia coli (strain K12) OX=83333 GN=flhA PE=3 SV=1  
sp|KRHB4\_HUMAN|  
sp|CAS9\_BOVIN|  
sp|RS27A\_HUMAN|  
Leu/Ile/Val-binding protein OS=Escherichia coli (strain K12) OX=83333 GN=livJ PE=1 SV=1  
Cation efflux system protein CusC OS=Escherichia coli (strain K12) OX=83333 GN=cusC PE=1 SV=1  
Uncharacterized lipoprotein GfcD OS=Escherichia coli (strain K12) OX=83333 GN=gfcD PE=3 SV=1  
Regulatory protein AtoC OS=Escherichia coli (strain K12) OX=83333 GN=atoC PE=1 SV=2  
Cytoplasmic trehalase OS=Escherichia coli (strain K12) OX=83333 GN=treF PE=1 SV=1  
Chaperone protein ClpB OS=Escherichia coli (strain K12) OX=83333 GN=clpB PE=3 SV=1  
D-1,6-bisphosphate 3-epimerase OS=Escherichia coli (strain K12) OX=83333 GN=alse PE=1 SV=1  
Uncharacterized protein YnbC OS=Escherichia coli (strain K12) OX=83333 GN=ynbC PE=1 SV=1  
2,5-diketone-D-gluconic acid reductase A OS=Escherichia coli (strain K12) OX=83333 GN=dkgA PE=1 SV=3  
Cell division protein FtsA OS=Escherichia coli (strain K12) OX=83333 GN=ftsA PE=1 SV=1  
Biotin synthase OS=Escherichia coli (strain K12) OX=83333 GN=bioB PE=1 SV=2  
D-xylosate dehydratase YjhG OS=Escherichia coli (strain K12) OX=83333 GN=yjhG PE=1 SV=2  
Uncharacterized protein YeiB OS=Escherichia coli (strain K12) OX=83333 GN=yeiB PE=3 SV=1  
Chromatin synthase OS=Escherichia coli (strain K12) OX=83333 GN=aroc PE=1 SV=4  
Colanic acid biosynthesis protein WcaK OS=Escherichia coli (strain K12) OX=83333 GN=wcaK PE=3 SV=2  
HMP-PP phosphatase OS=Escherichia coli (strain K12) OX=83333 GN=cof PE=1 SV=2  
sp|CYC\_HUMAN|  
Glucosamine-6-phosphate deaminase OS=Escherichia coli (strain K12) OX=83333 GN=nagB PE=1 SV=1  
50S ribosomal protein L18 OS=Escherichia coli (strain K12) OX=83333 GN=rpL18 PE=1 SV=1  
30S ribosomal protein S2 OS=Escherichia coli (strain K12) OX=83333 GN=rpsB PE=1 SV=2  
HTH-type transcriptional regulator GntR OS=Escherichia coli (strain K12) OX=83333 GN=gntR PE=1 SV=1  
Prophage integrase IntA OS=Escherichia coli (strain K12) OX=83333 GN=intA PE=1 SV=2  
Quinone-dependent D-lactate dehydrogenase OS=Escherichia coli (strain K12) OX=83333 GN=dld PE=1 SV=3  
Uncharacterized protein YgiM OS=Escherichia coli (strain K12) OX=83333 GN=ygiM PE=3 SV=1  
HTH-type transcriptional regulator GadW OS=Escherichia coli (strain K12) OX=83333 GN=gadW PE=1 SV=1  
Asparagine synthetase B [glutamine-hydrolyzing] OS=Escherichia coli (strain K12) OX=83333 GN=asnB PE=1 SV=3  
Fe(3+) dicitrate transport system permease protein FecD OS=Escherichia coli (strain K12) OX=83333 GN=fecD PE=1 SV=2  
Aspartate--RNA ligase OS=Escherichia coli (strain K12) OX=83333 GN=aspS PE=1 SV=1  
23S rRNA guanylyl transferase OS=Escherichia coli (strain K12) OX=83333 GN=rha PE=1 SV=2  
Single-stranded-DNA-specific exonuclease RecJ OS=Escherichia coli (strain K12) OX=83333 GN=recJ PE=1 SV=2  
Transcriptional regulatory protein RtcR OS=Escherichia coli (strain K12) OX=83333 GN=rtcR PE=4 SV=2  
Alkanesulfonate monooxygenase OS=Escherichia coli (strain K12) OX=83333 GN=ssuD PE=1 SV=3  
Hydrogenase-2 operon protein HybA OS=Escherichia coli (strain K12) OX=83333 GN=hybA PE=3 SV=1  
Prophage lipoprotein Bor homolog OS=Escherichia coli (strain K12) OX=83333 GN=borD PE=3 SV=1  
CRISPR system Cascade subunit CasA OS=Escherichia coli (strain K12) OX=83333 GN=casA PE=1 SV=1  
Ribosomal small subunit pseudouridine synthase A OS=Escherichia coli (strain K12) OX=83333 GN=rsaA PE=1 SV=1  
Glutathione-regulated potassium-efflux system protein KefB OS=Escherichia coli (strain K12) OX=83333 GN=kefB PE=3 SV=1  
Probable electron transfer flavoprotein-quinone oxidoreductase YdiS OS=Escherichia coli (strain K12) OX=83333 GN=ydiS PE=3 SV=1  
Maltose/maltodextrin-binding periplasmic protein OS=Escherichia coli (strain K12) OX=83333 GN=malE PE=1 SV=1  
Uncharacterized protein YbbC OS=Escherichia coli (strain K12) OX=83333 GN=ybbC PE=2 SV=1  
Melibiose carrier protein OS=Escherichia coli (strain K12) OX=83333 GN=melB PE=1 SV=2  
Uncharacterized protein YhdV OS=Escherichia coli (strain K12) OX=83333 GN=yhdV PE=3 SV=1  
PTS system fructose-specific ELIB BC component OS=Escherichia coli (strain K12) OX=83333 GN=fraA PE=1 SV=1  
2,3-cyclic-nucleotide 2-phosphodiesterase/3'-nucleotidase OS=Escherichia coli (strain K12) OX=83333 GN=cpdB PE=1 SV=2  
Malonyl-[acyl]-carrier protein D-methyltransferase OS=Escherichia coli (strain K12) OX=83333 GN=bioC PE=1 SV=2  
Protein translocase subunit SecE OS=Escherichia coli (strain K12) OX=83333 GN=secE PE=1 SV=1  
UDP-N-acetylmuramoylalanine--D-glutamate ligase OS=Escherichia coli (strain K12) OX=83333 GN=murD PE=1 SV=3  
Protein AsmA OS=Escherichia coli (strain K12) OX=83333 GN=asma PE=3 SV=2  
Phosphogluconate dehydratase OS=Escherichia coli (strain K12) OX=83333 GN=edd PE=1 SV=1  
Peptidoglycan D,D-transpeptidase MrdA OS=Escherichia coli (strain K12) OX=83333 GN=mrda PE=1 SV=1  
Elongation factor P-like protein SapD OS=Escherichia coli (strain K12) OX=83333 GN=sapD PE=1 SV=1  
ATP-dependent RNA helicase HraA OS=Escherichia coli (strain K12) OX=83333 GN=hraA PE=1 SV=3  
Signal recognition particle protein OS=Escherichia coli (strain K12) OX=83333 GN=ffh PE=1 SV=1  
Nitrate/nitrite sensor protein NarX OS=Escherichia coli (strain K12) OX=83333 GN=narX PE=1 SV=1  
Glycerol-3-phosphate regulon repressor OS=Escherichia coli (strain K12) OX=83333 GN=glpR PE=1 SV=1  
Glucans biosynthesis protein G OS=Escherichia coli (strain K12) OX=83333 GN=mdoG PE=1 SV=1  
30S ribosomal protein S11 OS=Escherichia coli (strain K12) OX=83333 GN=rpsK PE=1 SV=2  
DNA ligase B OS=Escherichia coli (strain K12) OX=83333 GN=ligB PE=1 SV=2  
sp|UB2E\_HUMAN|  
Macrolide export protein MacA OS=Escherichia coli (strain K12) OX=83333 GN=macA PE=1 SV=2  
Glutamine--fructose-6-phosphate aminotransferase [isomerizing] OS=Escherichia coli (strain K12) OX=83333 GN=glmS PE=1 SV=4  
Putrescine export system ATP-binding protein SapD OS=Escherichia coli (strain K12) OX=83333 GN=sapD PE=1 SV=1  
PEP-dependent dihydroxyacetone kinase, dihydroxyacetone-binding subunit DhaK OS=Escherichia coli (strain K12) OX=83333 GN=dhaK PE=5 SV=3  
3-exoribonuclease OS=Escherichia coli (strain K12) OX=83333 GN=ygiV PE=1 SV=1  
Putative uncharacterized protein YmdE OS=Escherichia coli (strain K12) OX=83333 GN=ymdE PE=5 SV=3  
Probable ketamine kinase YniA OS=Escherichia coli (strain K12) OX=83333 GN=yniA PE=3 SV=1  
FhuE receptor OS=Escherichia coli (strain K12) OX=83333 GN=fhuE PE=1 SV=2  
Lon protease OS=Escherichia coli (strain K12) OX=83333 GN=lon PE=1 SV=1  
Glutamate synthase [NADPH] large chain OS=Escherichia coli (strain K12) OX=83333 GN=gltB PE=1 SV=3  
30S ribosomal protein S3 OS=Escherichia coli (strain K12) OX=83333 GN=rpsC PE=1 SV=2  
Penicillin-binding protein 1A OS=Escherichia coli (strain K12) OX=83333 GN=mcrA PE=1 SV=1  
Anaerobic nitric oxide reductase transcription regulator NorR OS=Escherichia coli (strain K12) OX=83333 GN=norR PE=1 SV=2  
DNA-binding transcription activator Hyfr OS=Escherichia coli (strain K12) OX=83333 GN=hyfr PE=1 SV=1  
Tyrosine-protein kinase etk OS=Escherichia coli (strain K12) OX=83333 GN=etk PE=1 SV=2  
UPF0603 protein YgcG OS=Escherichia coli (strain K12) OX=83333 GN=ygcG PE=3 SV=2  
DNA polymerase I OS=Escherichia coli (strain K12) OX=83333 GN=polA PE=1 SV=1  
Probable FMN/FAD exporter YeeO OS=Escherichia coli (strain K12) OX=83333 GN=yeeO PE=1 SV=4  
L-threonine dehydratase catabolic TdcB OS=Escherichia coli (strain K12) OX=83333 GN=tdcB PE=1 SV=1

## Target Decoy False discovery rate

Peptide matches above identity threshold 574 64 11.15 %  
Peptide matches above homology or identity threshold 581 66 11.36 %

## Select Summary Report

Format As  Select Summary (protein hits)  [Help](#) [Help](#)  
Significance threshold p<  Max. number of hits  Show Percolator scores   
Standard scoring  MudPIT scoring   Display non-significant matches  Show sub-sets   
Show pop-ups  Suppress pop-ups  Require bold red   
Preferred taxonomy

All queries  Unassigned  Below homology threshold  Below identity threshold

1. 2:::TOP2B\_1-566 Mass: 66629 Score: 7506 Matches: 303(303) Sequences: 40(40) emPAI: 20.66

TOP2B\_1-566

| Query | Observed | Mr (expt) | Mr (calc) | ppm  | Miss | Score | Expect  | Rank | Unique | Peptide             |
|-------|----------|-----------|-----------|------|------|-------|---------|------|--------|---------------------|
| 397   | 401.7246 | 801.4346  | 801.4344  | 0.17 | 0    | 37    | 0.00029 | 1    | U      | K.AQTQLNK.K         |
| 473   | 410.7507 | 819.4867  | 819.4854  | 1.61 | 0    | 32    | 0.00067 | 1    | U      | K.IVGLQYK.K 464 471 |

|                       |           |           |           |       |   |      |          |   |   |                                                                                                                                                                                                                                                                                                                                                                     |
|-----------------------|-----------|-----------|-----------|-------|---|------|----------|---|---|---------------------------------------------------------------------------------------------------------------------------------------------------------------------------------------------------------------------------------------------------------------------------------------------------------------------------------------------------------------------|
| <a href="#">516</a>   | 414.7813  | 827.5480  | 827.5480  | 0.01  | 1 | 28   | 0.0016   | 1 | U | K.LIEVVK.K                                                                                                                                                                                                                                                                                                                                                          |
| <a href="#">623</a>   | 426.2422  | 850.4698  | 850.4701  | -0.35 | 0 | 29   | 0.0012   | 1 | U | R.YGVFPLR.G <a href="#">624</a> <a href="#">626</a> <a href="#">627</a>                                                                                                                                                                                                                                                                                             |
| <a href="#">758</a>   | 439.7584  | 877.5023  | 877.5022  | 0.22  | 0 | 34   | 0.00051  | 1 | U | K.GIPVVEHK.V <a href="#">759</a>                                                                                                                                                                                                                                                                                                                                    |
| <a href="#">975</a>   | 459.7572  | 917.4999  | 917.5004  | -0.59 | 0 | 49   | 2e-005   | 1 | U | K.DIVALMTR.R                                                                                                                                                                                                                                                                                                                                                        |
| <a href="#">1054</a>  | 465.7721  | 929.5297  | 929.5294  | 0.33  | 1 | 27   | 0.0025   | 1 | U | K.AQTQLNKK.C <a href="#">1053</a>                                                                                                                                                                                                                                                                                                                                   |
| <a href="#">1085</a>  | 467.7551  | 933.4956  | 933.4953  | 0.24  | 0 | (40) | 0.00015  | 1 | U | K.DIVALMTR.R <a href="#">1082</a> <a href="#">1083</a> <a href="#">1084</a> <a href="#">1086</a>                                                                                                                                                                                                                                                                    |
| <a href="#">1149</a>  | 473.2666  | 944.5187  | 944.5179  | 0.91  | 0 | 50   | 1.5e-005 | 1 | U | K.LDETGVALK.V                                                                                                                                                                                                                                                                                                                                                       |
| <a href="#">1201</a>  | 478.2316  | 954.4486  | 954.4481  | 0.54  | 0 | 26   | 0.0051   | 1 | U | K.FVTETACK.E                                                                                                                                                                                                                                                                                                                                                        |
| <a href="#">1252</a>  | 480.7449  | 959.4752  | 959.4746  | 0.64  | 0 | (20) | 0.016    | 1 | U | K.ENMTLQPK.S <a href="#">1250</a>                                                                                                                                                                                                                                                                                                                                   |
| <a href="#">1341</a>  | 488.2222  | 974.4299  | 974.4305  | -0.62 | 0 | 54   | 4.3e-006 | 1 | U | K.LDDANDAGG.H <a href="#">1342</a> <a href="#">1343</a>                                                                                                                                                                                                                                                                                                             |
| <a href="#">1348</a>  | 488.7413  | 975.4681  | 975.4695  | -1.46 | 0 | 22   | 0.0088   | 1 | U | K.ENMTLQPK.S <a href="#">1352</a> <a href="#">1353</a>                                                                                                                                                                                                                                                                                                              |
| <a href="#">1393</a>  | 491.7548  | 981.4951  | 981.4953  | -0.26 | 0 | 39   | 0.00024  | 1 | U | K.LCNIFSTK.F                                                                                                                                                                                                                                                                                                                                                        |
| <a href="#">1412</a>  | 493.7636  | 985.5126  | 985.5120  | 0.54  | 0 | 43   | 5.7e-005 | 1 | U | R.SYVDLYK.D <a href="#">1410</a> <a href="#">1411</a> <a href="#">1413</a>                                                                                                                                                                                                                                                                                          |
| <a href="#">1585</a>  | 505.2440  | 1008.4735 | 1008.4732 | 0.26  | 1 | (20) | 0.012    | 1 | U | R.DKNMTCIK.V                                                                                                                                                                                                                                                                                                                                                        |
| <a href="#">1604</a>  | 506.7296  | 1011.4446 | 1011.4444 | 0.20  | 0 | 43   | 8.1e-005 | 1 | U | R.AYDLAGSCR.G                                                                                                                                                                                                                                                                                                                                                       |
| <a href="#">1704</a>  | 513.2408  | 1024.4671 | 1024.4681 | -1.01 | 1 | 30   | 0.002    | 1 | U | R.DKNMTCIK.V                                                                                                                                                                                                                                                                                                                                                        |
| <a href="#">1714</a>  | 514.2324  | 1026.4503 | 1026.4505 | -0.23 | 0 | 46   | 2.7e-005 | 1 | U | K.SYDDAESLK.T <a href="#">1716</a> <a href="#">1717</a>                                                                                                                                                                                                                                                                                                             |
| <a href="#">1771</a>  | 518.2516  | 1034.4887 | 1034.4880 | 0.73  | 1 | 38   | 0.00025  | 1 | U | K.KEESATANK.N                                                                                                                                                                                                                                                                                                                                                       |
| <a href="#">2142</a>  | 360.8647  | 1079.5724 | 1079.5723 | 0.03  | 0 | (33) | 0.00077  | 1 | U | K.VIHELANER.W <a href="#">2132</a> <a href="#">2134</a> <a href="#">2137</a> <a href="#">2140</a> <a href="#">2145</a> <a href="#">2147</a> <a href="#">2150</a> <a href="#">2152</a>                                                                                                                                                                               |
| <a href="#">2144</a>  | 540.7935  | 1079.5725 | 1079.5723 | 0.19  | 0 | 57   | 3.5e-006 | 1 | U | K.VIHELANER.W <a href="#">2131</a> <a href="#">2135</a> <a href="#">2139</a> <a href="#">2143</a> <a href="#">2146</a> <a href="#">2148</a> <a href="#">2149</a>                                                                                                                                                                                                    |
| <a href="#">2492</a>  | 374.8732  | 1121.5976 | 1121.5982 | -0.49 | 1 | (20) | 0.017    | 1 | U | R.DRYGVFPLR.G                                                                                                                                                                                                                                                                                                                                                       |
| <a href="#">2493</a>  | 561.8066  | 1121.5986 | 1121.5982 | 0.35  | 1 | 28   | 0.0021   | 1 | U | R.DRYGVFPLR.G                                                                                                                                                                                                                                                                                                                                                       |
| <a href="#">2561</a>  | 376.8962  | 1127.6668 | 1127.6663 | 0.48  | 0 | (36) | 0.00027  | 1 | U | K.SLAVSGLGVIGR.D                                                                                                                                                                                                                                                                                                                                                    |
| <a href="#">2563</a>  | 564.8409  | 1127.6672 | 1127.6663 | 0.81  | 0 | 74   | 4.4e-008 | 1 | U | K.SLAVSGLGVIGR.D <a href="#">2549</a> <a href="#">2550</a> <a href="#">2551</a> <a href="#">2552</a> <a href="#">2554</a> <a href="#">2555</a> <a href="#">2556</a> <a href="#">2557</a> <a href="#">2558</a> <a href="#">2559</a> <a href="#">2560</a> <a href="#">2562</a> <a href="#">2564</a> <a href="#">2565</a> <a href="#">2566</a>                         |
| <a href="#">2786</a>  | 576.8188  | 1151.6230 | 1151.6227 | 0.32  | 0 | 28   | 0.0021   | 1 | U | R.EVTFVPGLYK.I <a href="#">2774</a> <a href="#">2777</a> <a href="#">2779</a> <a href="#">2783</a> <a href="#">2784</a>                                                                                                                                                                                                                                             |
| <a href="#">2814</a>  | 578.2802  | 1154.5458 | 1154.5455 | 0.30  | 1 | 34   | 0.0008   | 1 | U | K.KSYDDAESLK.T <a href="#">2812</a>                                                                                                                                                                                                                                                                                                                                 |
| <a href="#">2853</a>  | 387.2326  | 1158.6760 | 1158.6761 | -0.11 | 0 | (37) | 0.00028  | 1 | U | K.AGVSVKPFQVK.N <a href="#">2858</a> <a href="#">2859</a>                                                                                                                                                                                                                                                                                                           |
| <a href="#">2857</a>  | 580.3454  | 1158.6762 | 1158.6761 | 0.06  | 0 | 48   | 2e-005   | 1 | U | K.AGVSVKPFQVK.N <a href="#">2849</a> <a href="#">2856</a> <a href="#">2861</a> <a href="#">2862</a>                                                                                                                                                                                                                                                                 |
| <a href="#">3045</a>  | 396.8872  | 1187.6396 | 1187.6398 | -0.11 | 1 | (30) | 0.0022   | 1 | U | K.DKLDETGVALK.V <a href="#">3046</a> <a href="#">3052</a>                                                                                                                                                                                                                                                                                                           |
| <a href="#">3050</a>  | 594.8272  | 1187.6398 | 1187.6398 | 0.04  | 1 | 50   | 2.2e-005 | 1 | U | K.DKLDETGVALK.V <a href="#">3047</a> <a href="#">3049</a> <a href="#">3051</a>                                                                                                                                                                                                                                                                                      |
| <a href="#">3118</a>  | 600.2537  | 1198.4929 | 1198.4933 | -0.33 | 0 | (28) | 0.0018   | 1 | U | K.QTWMNNMK.T <a href="#">3120</a>                                                                                                                                                                                                                                                                                                                                   |
| <a href="#">3121</a>  | 600.2544  | 1198.4942 | 1198.4933 | 0.72  | 0 | 32   | 0.0009   | 1 | U | K.QTWMNNMK.T <a href="#">3117</a> <a href="#">3119</a> <a href="#">3122</a>                                                                                                                                                                                                                                                                                         |
| <a href="#">3223</a>  | 608.2517  | 1214.4888 | 1214.4882 | 0.48  | 0 | (31) | 0.00074  | 1 | U | K.QTWMNNMK.T <a href="#">3219</a> <a href="#">3221</a> <a href="#">3225</a>                                                                                                                                                                                                                                                                                         |
| <a href="#">3224</a>  | 608.2518  | 1214.4889 | 1214.4882 | 0.60  | 0 | (27) | 0.0019   | 1 | U | K.QTWMNNMK.T <a href="#">3222</a>                                                                                                                                                                                                                                                                                                                                   |
| <a href="#">3226</a>  | 608.2526  | 1214.4905 | 1214.4882 | 1.92  | 0 | (30) | 0.00091  | 1 | U | K.QTWMNNMK.T                                                                                                                                                                                                                                                                                                                                                        |
| <a href="#">3542</a>  | 625.8076  | 1249.6007 | 1249.6013 | -0.47 | 0 | 44   | 8.5e-005 | 1 | U | R.WDVCLTSEK.G                                                                                                                                                                                                                                                                                                                                                       |
| <a href="#">3760</a>  | 637.8605  | 1273.7065 | 1273.7064 | 0.08  | 1 | 77   | 2.7e-008 | 1 | U | K.LDKDIVALMTR.R <a href="#">3750</a> <a href="#">3752</a> <a href="#">3755</a> <a href="#">3759</a> <a href="#">3761</a> <a href="#">3762</a> <a href="#">3764</a> <a href="#">3765</a>                                                                                                                                                                             |
| <a href="#">3766</a>  | 425.5762  | 1273.7068 | 1273.7064 | 0.35  | 1 | (33) | 0.00078  | 1 | U | K.LDKDIVALMTR.R <a href="#">3753</a> <a href="#">3768</a>                                                                                                                                                                                                                                                                                                           |
| <a href="#">3890</a>  | 430.9077  | 1289.7012 | 1289.7013 | -0.12 | 1 | (33) | 0.001    | 1 | U | K.LDKDIVALMTR.R <a href="#">3881</a> <a href="#">3884</a> <a href="#">3886</a> <a href="#">3888</a> <a href="#">3895</a> <a href="#">3896</a>                                                                                                                                                                                                                       |
| <a href="#">3894</a>  | 645.8581  | 1289.7016 | 1289.7013 | 0.26  | 1 | (62) | 1.4e-006 | 1 | U | K.LDKDIVALMTR.R <a href="#">3882</a> <a href="#">3883</a> <a href="#">3885</a> <a href="#">3887</a> <a href="#">3889</a> <a href="#">3892</a> <a href="#">3893</a>                                                                                                                                                                                                  |
| <a href="#">4374</a>  | 453.2417  | 1356.7032 | 1356.7038 | -0.45 | 0 | (44) | 0.00011  | 1 | U | R.HVDYVVDQVVGK.L <a href="#">4380</a> <a href="#">4390</a>                                                                                                                                                                                                                                                                                                          |
| <a href="#">4388</a>  | 679.3593  | 1356.7041 | 1356.7038 | 0.24  | 0 | 81   | 2.5e-008 | 1 | U | R.HVDYVVDQVVGK.L <a href="#">4375</a> <a href="#">4376</a> <a href="#">4377</a> <a href="#">4378</a> <a href="#">4381</a> <a href="#">4382</a> <a href="#">4383</a> <a href="#">4384</a> <a href="#">4385</a> <a href="#">4386</a> <a href="#">4387</a> <a href="#">4389</a> <a href="#">4391</a> <a href="#">4392</a> <a href="#">4394</a>                         |
| <a href="#">5153</a>  | 731.3817  | 1460.7488 | 1460.7511 | -1.58 | 0 | 82   | 1.6e-008 | 1 | U | K.IFDEILVNAADNK.Q <a href="#">5157</a> <a href="#">5158</a> <a href="#">5163</a> <a href="#">5169</a> <a href="#">5170</a> <a href="#">5174</a> <a href="#">5176</a> <a href="#">5180</a> <a href="#">5181</a> <a href="#">5182</a> <a href="#">5183</a> <a href="#">5185</a> <a href="#">5187</a>                                                                  |
| <a href="#">5160</a>  | 487.9241  | 1460.7505 | 1460.7511 | -0.40 | 0 | (49) | 3.2e-005 | 1 | U | K.IFDEILVNAADNK.Q <a href="#">5151</a> <a href="#">5152</a> <a href="#">5155</a> <a href="#">5156</a> <a href="#">5159</a> <a href="#">5161</a> <a href="#">5162</a> <a href="#">5164</a> <a href="#">5165</a> <a href="#">5166</a> <a href="#">5167</a> <a href="#">5168</a> <a href="#">5171</a> <a href="#">5172</a> <a href="#">5173</a> <a href="#">5175</a>   |
| <a href="#">5875</a>  | 765.4037  | 1528.7928 | 1528.7919 | 0.61  | 0 | 96   | 6e-010   | 1 | U | K.QIMENAEINNIK.I <a href="#">5877</a>                                                                                                                                                                                                                                                                                                                               |
| <a href="#">5876</a>  | 510.6049  | 1528.7928 | 1528.7919 | 0.64  | 0 | (32) | 0.0017   | 1 | U | K.QIMENAEINNIK.I                                                                                                                                                                                                                                                                                                                                                    |
| <a href="#">6055</a>  | 773.4005  | 1544.7865 | 1544.7868 | -0.18 | 0 | (75) | 8e-008   | 1 | U | K.QIMENAEINNIK.I <a href="#">6052</a> <a href="#">6053</a> <a href="#">6054</a> <a href="#">6056</a>                                                                                                                                                                                                                                                                |
| <a href="#">6238</a>  | 522.9128  | 1565.7167 | 1565.7169 | -0.11 | 2 | 20   | 0.04     | 1 | U | K.KEESATANKNDSSK.K <a href="#">6239</a>                                                                                                                                                                                                                                                                                                                             |
| <a href="#">6773</a>  | 820.9358  | 1639.8571 | 1639.8570 | 0.10  | 0 | 81   | 1.6e-008 | 1 | U | K.GFQQISFVNSIATTK.G <a href="#">6758</a> <a href="#">6759</a> <a href="#">6761</a> <a href="#">6762</a> <a href="#">6763</a> <a href="#">6764</a> <a href="#">6765</a> <a href="#">6769</a> <a href="#">6770</a> <a href="#">6771</a> <a href="#">6772</a> <a href="#">6775</a> <a href="#">6776</a> <a href="#">6777</a> <a href="#">6778</a> <a href="#">6779</a> |
| <a href="#">6774</a>  | 547.6264  | 1639.8573 | 1639.8570 | 0.17  | 0 | (56) | 5.1e-006 | 1 | U | K.GFQQISFVNSIATTK.G <a href="#">6756</a> <a href="#">6760</a> <a href="#">6766</a> <a href="#">6767</a> <a href="#">6782</a>                                                                                                                                                                                                                                        |
| <a href="#">7469</a>  | 866.4067  | 1730.7989 | 1730.7968 | 1.23  | 0 | (69) | 4.4e-007 | 1 | U | K.IMIMTDQDQDGSNIK.A <a href="#">7466</a>                                                                                                                                                                                                                                                                                                                            |
| <a href="#">7470</a>  | 577.9414  | 1730.8024 | 1730.7968 | 3.25  | 0 | (23) | 0.02     | 1 | U | K.IMIMTDQDQDGSNIK.A <a href="#">7468</a>                                                                                                                                                                                                                                                                                                                            |
| <a href="#">7565</a>  | 583.2707  | 1746.7902 | 1746.7917 | -0.84 | 0 | (32) | 0.0016   | 1 | U | K.IMIMTDQDQDGSNIK.A <a href="#">7580</a>                                                                                                                                                                                                                                                                                                                            |
| <a href="#">7567</a>  | 874.4030  | 1746.7915 | 1746.7917 | -0.11 | 0 | (68) | 3.8e-007 | 1 | U | K.IMIMTDQDQDGSNIK.A <a href="#">7569</a> <a href="#">7576</a>                                                                                                                                                                                                                                                                                                       |
| <a href="#">7570</a>  | 874.4031  | 1746.7916 | 1746.7917 | -0.06 | 0 | 77   | 6.1e-008 | 1 | U | K.IMIMTDQDQDGSNIK.A <a href="#">7575</a>                                                                                                                                                                                                                                                                                                                            |
| <a href="#">7578</a>  | 583.2716  | 1746.7930 | 1746.7917 | 0.78  | 0 | (48) | 4.3e-005 | 1 | U | K.IMIMTDQDQDGSNIK.A <a href="#">7564</a> <a href="#">7568</a> <a href="#">7571</a> <a href="#">7572</a> <a href="#">7573</a> <a href="#">7574</a> <a href="#">7579</a>                                                                                                                                                                                              |
| <a href="#">7688</a>  | 588.6029  | 1762.7869 | 1762.7866 | 0.18  | 0 | (62) | 2.5e-006 | 1 | U | K.IMIMTDQDQDGSNIK.A <a href="#">7679</a> <a href="#">7680</a> <a href="#">7681</a> <a href="#">7682</a> <a href="#">7686</a> <a href="#">7687</a> <a href="#">7689</a> <a href="#">7691</a> <a href="#">7693</a> <a href="#">7694</a> <a href="#">7700</a>                                                                                                          |
| <a href="#">7697</a>  | 882.4014  | 1762.7882 | 1762.7866 | 0.91  | 0 | (72) | 3e-007   | 1 | U | K.IMIMTDQDQDGSNIK.A <a href="#">7678</a> <a href="#">7684</a> <a href="#">7685</a> <a href="#">7692</a> <a href="#">7695</a> <a href="#">7696</a> <a href="#">7698</a> <a href="#">7699</a>                                                                                                                                                                         |
| <a href="#">7762</a>  | 591.9606  | 1772.8600 | 1772.8615 | -0.82 | 0 | (24) | 0.014    | 1 | U | K.HSLECTLILTEGSAK.S                                                                                                                                                                                                                                                                                                                                                 |
| <a href="#">7763</a>  | 887.4382  | 1772.8618 | 1772.8615 | 0.22  | 0 | 93   | 1.8e-009 | 1 | U | K.HSLECTLILTEGSAK.S                                                                                                                                                                                                                                                                                                                                                 |
| <a href="#">8521</a>  | 629.3266  | 1884.9580 | 1884.9581 | -0.04 | 0 | (59) | 2.5e-006 | 1 | U | K.VSIDPESNIISWNGK.G                                                                                                                                                                                                                                                                                                                                                 |
| <a href="#">8522</a>  | 943.4864  | 1884.9583 | 1884.9581 | 0.11  | 0 | 77   | 4.3e-008 | 1 | U | K.VSIDPESNIISWNGK.G                                                                                                                                                                                                                                                                                                                                                 |
| <a href="#">9649</a>  | 724.9902  | 2171.9488 | 2171.9470 | 0.83  | 0 | 40   | 0.00043  | 1 | U | K.HFDGEDYTCITFQPLSK.F                                                                                                                                                                                                                                                                                                                                               |
| <a href="#">10285</a> | 805.3811  | 2413.1216 | 2413.1260 | -1.85 | 1 | 55   | 1.5e-005 | 1 | U | K.IKHFQDGEDYTCITFQPLSK.F <a href="#">10286</a>                                                                                                                                                                                                                                                                                                                      |
| <a href="#">10546</a> | 1244.1186 | 2486.2226 | 2486.2217 | 0.36  | 0 | 86   | 1.3e-008 | 1 | U | K.VYVPALIFGQLLTSSNYDDDEK.K <a href="#">10538</a> <a href="#">10543</a> <a href="#">10548</a> <a href="#">10550</a> <a href="#">10551</a>                                                                                                                                                                                                                            |
| <a href="#">10547</a> | 829.7482  | 2486.2227 | 2486.2217 | 0.40  | 0 | (54) | 2.1e-005 | 1 | U | K.VYVPALIFGQLLTSSNYDDDEK.K <a href="#">10541</a>                                                                                                                                                                                                                                                                                                                    |
| <a href="#">10737</a> | 859.4251  | 2575.2534 | 2575.2529 | 0.19  | 0 | 39   | 0.00073  | 1 | U | K.NHIWVFINLIENPTFDSOTK.E                                                                                                                                                                                                                                                                                                                                            |
| <a href="#">10815</a> | 872.4458  | 2614.3155 | 2614.3166 | -0.43 | 1 | (54) | 1.9e-005 | 1 | U | K.VYVPALIFGQLLTSSNYDDDEK.V <a href="#">10813</a> <a href="#">10817</a> <a href="#">10818</a> <a href="#">10824</a> <a href="#">10829</a> <a href="#">10830</a>                                                                                                                                                                                                      |
| <a href="#">10819</a> | 654.5865  | 2614.3169 | 2614.3166 | 0.10  | 1 | (47) | 9.7e-005 | 1 | U | K.VYVPALIFGQLLTSSNYDDDEK.V <a href="#">10820</a>                                                                                                                                                                                                                                                                                                                    |
| <a href="#">10827</a> | 1308.1665 | 2614.3185 | 2614.3166 | 0.72  | 1 | 64   | 2.1e-006 | 1 | U | K.VYVPALIFGQLLTSSNYDDDEK.V <a href="#">10812</a>                                                                                                                                                                                                                                                                                                                    |

2. [L::sp|K1C10\\_HUMAN|](#) Mass: 59711 Score: 1630 Matches: 47(47) Sequences: 26(26) emPAI: 7.52

sp|K1C10\_HUMAN|

| Query                | Observed | Mr (expt) | Mr (calc) | ppm   | Miss | Score | Expect   | Rank | Unique | Peptide                           |
|----------------------|----------|-----------|-----------|-------|------|-------|----------|------|--------|-----------------------------------|
| <a href="#">419</a>  | 404.2030 | 806.3915  | 806.3923  | -0.98 | 0    | 42    | 8.9e-005 | 1    |        | R.LAADDFR.L                       |
| <a href="#">428</a>  | 405.2240 | 808.4334  | 808.4330  | 0.45  | 0    | 30    | 0.00091  | 1    |        | R.LASYLDK.V                       |
| <a href="#">602</a>  | 424.2297 | 846.4449  | 846.4447  | 0.30  | 0    | 25    | 0.0049   | 1    | U      | K.SEITELR.R                       |
| <a href="#">959</a>  | 458.6957 | 915.3769  | 915.3756  | 1.39  | 0    | 25    | 0.0042   | 1    |        | K.NHEEEMK.D                       |
| <a href="#">1464</a> | 497.2533 | 992.4920  | 992.4927  | -0.71 | 0    | 45    | 4.9e-005 | 1    | U      | K.YENEVALR.Q                      |
| <a href="#">1476</a> | 498.2636 | 994.5126  | 994.5123  | 0.27  | 1    | 27    | 0.0057   | 1    | U      | K.IKEWYEK.H                       |
| <a href="#">1537</a> | 502.2799 | 1002.5453 | 1002.5458 | -0.47 | 1    | 23    | 0.0079   | 1    | U      | K.SEITELRR.N                      |
| <a href="#">1751</a> | 516.3022 | 1030.5899 | 1030.5910 | -1.10 | 0    | 55    | 3.4e-006 | 1    |        | R.VLDELTLTK.A                     |
| <a href="#">2223</a> | 545.7691 | 1089.5236 | 1089.5237 | -0.10 | 0    | (46)  | 3.8e-005 | 1    | U      | K.VTQNLNDR.L                      |
| <a href="#">2354</a> | 553.7668 | 1105.5191 | 1105.5186 | 0.44  | 0    | 59    | 2e-006   | 1    | U      | K.VTQNLNDR.L <a href="#">2352</a> |
| <a href="#">3133</a> | 601.3123 | 1200.6100 | 1200.6098 | 0.13  | 0    | 62    | 1.5e-006 | 1    |        | R.QSVEADINGLR.R                   |

|                       |           |           |           |       |   |      |          |   |   |                                                                 |
|-----------------------|-----------|-----------|-----------|-------|---|------|----------|---|---|-----------------------------------------------------------------|
| <a href="#">3387</a>  | 617.8431  | 1233.6717 | 1233.6717 | -0.00 | 1 | 34   | 0.00052  | 1 | U | R.LKYENEVALR.Q                                                  |
| <a href="#">3388</a>  | 412.2313  | 1233.6720 | 1233.6717 | 0.24  | 1 | (34) | 0.00056  | 1 | U | R.LKYENEVALR.Q                                                  |
| <a href="#">3634</a>  | 631.8023  | 1261.5901 | 1261.5899 | 0.21  | 0 | 65   | 7e-007   | 1 | U | R.SLLEGGSSGGGR.G                                                |
| <a href="#">3950</a>  | 434.2033  | 1299.5880 | 1299.5877 | 0.23  | 1 | 34   | 0.00094  | 1 | U | K.NHEEEMKDLR.N                                                  |
| <a href="#">4452</a>  | 683.3235  | 1364.6324 | 1364.6320 | 0.30  | 0 | 66   | 4.1e-007 | 1 | U | R.SQYEQLAEQNR.K                                                 |
| <a href="#">4567</a>  | 691.3281  | 1380.6417 | 1380.6408 | 0.64  | 0 | 81   | 2.3e-008 | 1 | U | R.ALEESNYELEGK.I                                                |
| <a href="#">4903</a>  | 717.8887  | 1433.7628 | 1433.7626 | 0.15  | 1 | 60   | 2.1e-006 | 1 | U | K.IRLENEIQTYR.S                                                 |
| <a href="#">5458</a>  | 747.3708  | 1492.7269 | 1492.7270 | -0.02 | 1 | 49   | 4e-005   | 1 | U | R.SQYEQLAEQNR.K                                                 |
| <a href="#">5459</a>  | 498.5832  | 1492.7278 | 1492.7270 | 0.53  | 1 | (31) | 0.0023   | 1 | U | R.SQYEQLAEQNR.K                                                 |
| <a href="#">7283</a>  | 854.3888  | 1706.7630 | 1706.7649 | -1.10 | 0 | 110  | 2.2e-011 | 1 | U | K.GSLGGFFSGGFSR.G                                               |
| <a href="#">7969</a>  | 599.6753  | 1796.0040 | 1796.0043 | -0.15 | 0 | (90) | 1.1e-009 | 1 | U | R.NVQALEIQLSQLALK.Q                                             |
| <a href="#">7971</a>  | 899.0096  | 1796.0047 | 1796.0043 | 0.19  | 0 | 117  | 1.8e-012 | 1 | U | R.NVQALEIQLSQLALK.Q <a href="#">7970</a>                        |
| <a href="#">9028</a>  | 666.3284  | 1995.9634 | 1995.9636 | -0.12 | 0 | (41) | 0.00034  | 1 | U | K.ELTTEIDNNEIQISSYK.S                                           |
| <a href="#">9029</a>  | 998.9900  | 1995.9653 | 1995.9636 | 0.86  | 0 | 81   | 3.4e-008 | 1 | U | K.ELTTEIDNNEIQISSYK.S                                           |
| <a href="#">9370</a>  | 1048.5271 | 2095.0397 | 2095.0394 | 0.12  | 0 | (75) | 1.6e-007 | 1 | U | K.ADLEMQIESLTELAYLK.K <a href="#">9369</a> <a href="#">9372</a> |
| <a href="#">9371</a>  | 699.3545  | 2095.0416 | 2095.0394 | 1.06  | 0 | (49) | 5.1e-005 | 1 | U | K.ADLEMQIESLTELAYLK.K                                           |
| <a href="#">9458</a>  | 704.6854  | 2111.0344 | 2111.0343 | 0.03  | 0 | (49) | 4.4e-005 | 1 | U | K.ADLEMQIESLTELAYLK.K                                           |
| <a href="#">9459</a>  | 1056.5249 | 2111.0353 | 2111.0343 | 0.45  | 0 | 77   | 6.9e-008 | 1 | U | K.ADLEMQIESLTELAYLK.K                                           |
| <a href="#">9788</a>  | 738.0386  | 2211.0940 | 2211.0906 | 1.53  | 1 | 44   | 0.0002   | 1 | U | K.SKELTTEIDNNEIQISSYK.S <a href="#">9787</a>                    |
| <a href="#">9830</a>  | 742.0526  | 2223.1358 | 2223.1344 | 0.65  | 1 | 21   | 0.027    | 1 | U | K.ADLEMQIESLTELAYLK.K.N                                         |
| <a href="#">10190</a> | 1184.1328 | 2366.2509 | 2366.2553 | -1.86 | 0 | 61   | 1.9e-006 | 1 | U | K.NQILNLTDDNANILLQIDNAR.L <a href="#">10191</a>                 |
| <a href="#">10192</a> | 789.7587  | 2366.2542 | 2366.2553 | -0.49 | 0 | (60) | 2.3e-006 | 1 | U | K.NQILNLTDDNANILLQIDNAR.L <a href="#">10193</a>                 |
| <a href="#">11262</a> | 958.1358  | 2871.3856 | 2871.3855 | 0.05  | 0 | (45) | 0.00023  | 1 | U | R.NVSTGDVNVEMNAAPGVDLTQLLNMR.S                                  |
| <a href="#">11283</a> | 963.4665  | 2887.3776 | 2887.3804 | -0.99 | 0 | (39) | 0.00083  | 1 | U | R.NVSTGDVNVEMNAAPGVDLTQLLNMR.S <a href="#">11282</a>            |
| <a href="#">11285</a> | 963.4687  | 2887.3843 | 2887.3804 | 1.34  | 0 | 65   | 2.2e-006 | 1 | U | R.NVSTGDVNVEMNAAPGVDLTQLLNMR.S                                  |
| <a href="#">11322</a> | 968.7992  | 2903.3757 | 2903.3753 | 0.12  | 0 | (48) | 9.2e-005 | 1 | U | R.NVSTGDVNVEMNAAPGVDLTQLLNMR.S                                  |
| <a href="#">11763</a> | 1018.2139 | 3051.6200 | 3051.6200 | -0.00 | 1 | 60   | 2.4e-006 | 1 | U | K.TIDDLKNQILNLTDDNANILLQIDNAR.L <a href="#">11762</a>           |

3. [1::sp|K2C1\\_HUMAN|](#) Mass: 66018 Score: 1517 Matches: 45(45) Sequences: 29(29) emPAI: 7.43

[sp|K2C1\\_HUMAN|](#)

| Query                 | Observed  | Mr (expt) | Mr (calc) | ppm   | Miss | Score | Expect   | Rank | Unique | Peptide                                                                       |
|-----------------------|-----------|-----------|-----------|-------|------|-------|----------|------|--------|-------------------------------------------------------------------------------|
| <a href="#">406</a>   | 402.7085  | 803.4024  | 803.4025  | -0.12 | 0    | 28    | 0.0015   | 1    | U      | R.SEIDNVK.K                                                                   |
| <a href="#">742</a>   | 437.7535  | 873.4924  | 873.4920  | 0.47  | 0    | 45    | 4.4e-005 | 1    | U      | R.SLVNLGGSK.S                                                                 |
| <a href="#">1069</a>  | 466.7559  | 931.4973  | 931.4974  | -0.16 | 1    | 37    | 0.00045  | 1    | U      | R.SEIDNVKK.Q                                                                  |
| <a href="#">1329</a>  | 487.2696  | 972.5246  | 972.5240  | 0.67  | 0    | 41    | 8.9e-005 | 1    | U      | K.IEISELNR.V                                                                  |
| <a href="#">1506</a>  | 500.2263  | 998.4381  | 998.4379  | 0.23  | 0    | 45    | 5e-005   | 1    | U      | K.DVDGAYMTK.V                                                                 |
| <a href="#">1624</a>  | 508.2235  | 1014.4325 | 1014.4328 | -0.30 | 0    | (41)  | 7.3e-005 | 1    | U      | K.DVDGAYMTK.V                                                                 |
| <a href="#">1760</a>  | 517.2620  | 1032.5094 | 1032.5087 | 0.66  | 0    | 35    | 0.00042  | 1    | U      | R.TLLEGEESR.M                                                                 |
| <a href="#">2015</a>  | 533.7621  | 1065.5097 | 1065.5090 | 0.62  | 1    | 29    | 0.0019   | 1    | U      | K.YEDEINKR.T                                                                  |
| <a href="#">2016</a>  | 356.1772  | 1065.5099 | 1065.5090 | 0.76  | 1    | (23)  | 0.0082   | 1    | U      | K.YEDEINKR.T                                                                  |
| <a href="#">2076</a>  | 537.3011  | 1072.5877 | 1072.5876 | 0.08  | 1    | 35    | 0.00093  | 1    | U      | R.LRSEIDNVK.K                                                                 |
| <a href="#">2250</a>  | 546.7552  | 1091.4959 | 1091.4956 | 0.27  | 0    | 59    | 1.4e-006 | 1    | U      | R.GSGGSSGSGSIGGR.G                                                            |
| <a href="#">2523</a>  | 563.2746  | 1124.5346 | 1124.5349 | -0.25 | 0    | 64    | 7.4e-007 | 1    | U      | K.AEAESLYQSK.Y                                                                |
| <a href="#">2538</a>  | 564.2737  | 1126.5329 | 1126.5329 | 0.01  | 1    | (31)  | 0.0016   | 1    | U      | K.KVDGAYMTK.V                                                                 |
| <a href="#">2692</a>  | 572.2676  | 1142.5207 | 1142.5278 | -6.16 | 1    | 40    | 0.00014  | 1    | U      | K.KVDGAYMTK.V                                                                 |
| <a href="#">2769</a>  | 576.7801  | 1151.5457 | 1151.5458 | -0.12 | 1    | 27    | 0.0046   | 1    | U      | R.NKYEDEINKR                                                                  |
| <a href="#">2825</a>  | 579.2612  | 1156.5079 | 1156.5070 | 0.79  | 0    | 42    | 0.00012  | 1    | U      | R.DYQELMNTK.L                                                                 |
| <a href="#">2986</a>  | 590.3039  | 1178.5932 | 1178.5931 | 0.11  | 0    | 67    | 4.8e-007 | 1    | U      | K.YEELQITAGR.H <a href="#">2985</a>                                           |
| <a href="#">3136</a>  | 401.2345  | 1200.6816 | 1200.6826 | -0.85 | 2    | 23    | 0.0062   | 1    | U      | R.LRSEIDNVK.K                                                                 |
| <a href="#">3137</a>  | 601.3488  | 1200.6831 | 1200.6826 | 0.44  | 2    | (17)  | 0.028    | 1    | U      | R.LRSEIDNVK.K                                                                 |
| <a href="#">3791</a>  | 639.3587  | 1276.7029 | 1276.7027 | 0.17  | 0    | 70    | 1.7e-007 | 1    | U      | K.LALDLEIATYR.T                                                               |
| <a href="#">3947</a>  | 650.7680  | 1299.5215 | 1299.5224 | -0.64 | 0    | (58)  | 2.4e-006 | 1    | U      | K.NMQDMVEDYR.N                                                                |
| <a href="#">3986</a>  | 651.8612  | 1301.7079 | 1301.7078 | 0.08  | 0    | 65    | 6.4e-007 | 1    | U      | R.SLDLSIAEVK.A                                                                |
| <a href="#">4028</a>  | 436.8896  | 1307.6470 | 1307.6469 | 0.08  | 2    | 37    | 0.00052  | 1    | U      | R.NKYEDEINKR.T                                                                |
| <a href="#">4029</a>  | 654.8309  | 1307.6472 | 1307.6469 | 0.23  | 2    | (33)  | 0.0013   | 1    | U      | R.NKYEDEINKR.T                                                                |
| <a href="#">4087</a>  | 658.7659  | 1315.5172 | 1315.5173 | -0.03 | 0    | (46)  | 2.3e-005 | 1    | U      | K.NMQDMVEDYR.N                                                                |
| <a href="#">4088</a>  | 658.7664  | 1315.5183 | 1315.5173 | 0.77  | 0    | 61    | 7.9e-007 | 1    | U      | K.NMQDMVEDYR.N                                                                |
| <a href="#">4230</a>  | 666.7634  | 1331.5123 | 1331.5122 | 0.09  | 0    | (48)  | 1.5e-005 | 1    | U      | K.NMQDMVEDYR.N <a href="#">4231</a> <a href="#">4232</a> <a href="#">4233</a> |
| <a href="#">4283</a>  | 670.8385  | 1339.6625 | 1339.6619 | 0.46  | 1    | 60    | 2.1e-006 | 1    | U      | K.SKAEAESLYQSK.Y                                                              |
| <a href="#">4373</a>  | 679.3517  | 1356.6888 | 1356.6885 | 0.27  | 0    | 72    | 1.9e-007 | 1    | U      | K.LNLDLALQOAK.E                                                               |
| <a href="#">4587</a>  | 692.3493  | 1382.6841 | 1382.6830 | 0.76  | 0    | 64    | 7.2e-007 | 1    | U      | K.SLNNQFASFDK.V                                                               |
| <a href="#">5311</a>  | 738.3940  | 1474.7734 | 1474.7780 | -3.10 | 0    | 83    | 1.1e-008 | 1    | U      | R.FLEQQNQVLQK.W                                                               |
| <a href="#">6898</a>  | 829.4002  | 1656.7859 | 1656.7856 | 0.16  | 0    | 74    | 1.6e-007 | 1    | U      | R.SGGFSSGSGAGIINYQR.R <a href="#">6899</a>                                    |
| <a href="#">6900</a>  | 553.2700  | 1656.7882 | 1656.7856 | 1.55  | 0    | (20)  | 0.034    | 1    | U      | R.SGGFSSGSGAGIINYQR.R                                                         |
| <a href="#">7358</a>  | 858.9290  | 1715.8435 | 1715.8438 | -0.15 | 0    | 81    | 2.7e-008 | 1    | U      | K.QISNLQOISDAEQR.G                                                            |
| <a href="#">7359</a>  | 572.9553  | 1715.8440 | 1715.8438 | 0.08  | 0    | (41)  | 0.00031  | 1    | U      | K.QISNLQOISDAEQR.G                                                            |
| <a href="#">8306</a>  | 615.6538  | 1843.9396 | 1843.9388 | 0.47  | 1    | 18    | 0.042    | 1    | U      | K.QOISNLQOISDAEQR.G                                                           |
| <a href="#">9022</a>  | 665.3300  | 1992.9683 | 1992.9693 | -0.53 | 0    | 45    | 0.00013  | 1    | U      | R.THNLEPYFESFINLR.R                                                           |
| <a href="#">10213</a> | 1192.4786 | 2382.9426 | 2382.9447 | -0.87 | 0    | 103   | 9e-011   | 1    | U      | R.GGGGGYSGSSYSGGGYSGGGGGGR.G                                                  |
| <a href="#">10214</a> | 795.3222  | 2382.9447 | 2382.9447 | 0.02  | 0    | (76)  | 4.6e-008 | 1    | U      | R.GGGGGYSGSSYSGGGYSGGGGGGR.G                                                  |
| <a href="#">12365</a> | 1104.7747 | 3311.3023 | 3311.3009 | 0.42  | 0    | 95    | 9.9e-010 | 1    | U      | R.GSYSGSSYSGGGYSGGGGGHGSYSGSSGGYR.G                                           |

4. [1::sp|K22E\\_HUMAN|](#) Mass: 66110 Score: 1232 Matches: 35(35) Sequences: 28(28) emPAI: 5.92

[sp|K22E\\_HUMAN|](#)

| Query                | Observed | Mr (expt) | Mr (calc) | ppm   | Miss | Score | Expect   | Rank | Unique | Peptide       |
|----------------------|----------|-----------|-----------|-------|------|-------|----------|------|--------|---------------|
| <a href="#">514</a>  | 414.2188 | 826.4230  | 826.4225  | 0.61  | 0    | 33    | 0.00055  | 1    | U      | K.FASFDK.V    |
| <a href="#">523</a>  | 416.2506 | 830.4867  | 830.4862  | 0.62  | 0    | 30    | 0.00097  | 1    | U      | R.SLVGLGGTK.S |
| <a href="#">1329</a> | 487.2696 | 972.5246  | 972.5240  | 0.67  | 0    | 41    | 8.9e-005 | 1    | U      | K.IEISELNR.V  |
| <a href="#">1471</a> | 497.7876 | 993.5607  | 993.5607  | -0.03 | 0    | 49    | 1.4e-005 | 1    | U      | R.LQGEIAHVK.K |
| <a href="#">1776</a> | 519.2675 | 1036.5204 | 1036.5189 | 1.41  | 0    | 54    | 8.1e-006 | 1    | U      | R.YLDGLTAEK.T |
| <a href="#">1780</a> | 519.7591 | 1037.5037 | 1037.5029 | 0.78  | 1    | 35    | 0.00045  | 1    | U      | K.KYEDEINKR   |
| <a href="#">1798</a> | 521.2823 | 1040.5500 | 1040.5502 | -0.22 | 0    | 46    | 2.4e-005 | 1    | U      | K.VDPEIQNVK.A |
| <a href="#">2015</a> | 533.7621 | 1065.5097 | 1065.5090 | 0.62  | 1    | 29    | 0.0019   | 1    | U      | K.YEDEINKR.T  |
| <a href="#">2016</a> | 356.1772 | 1065.5099 | 1065.5090 | 0.76  | 1    | (23)  | 0.0082   | 1    | U      | K.YEDEINKR.T  |
| <a href="#">2180</a> | 542.7526 | 1083.4907 | 1083.4906 | 0.04  | 0    | 38    | 0.00022  | 1    | U      | K.DVDNAYIK.V  |

|                       |           |           |           |       |   |      |          |   |   |                                                                 |
|-----------------------|-----------|-----------|-----------|-------|---|------|----------|---|---|-----------------------------------------------------------------|
| <a href="#">2359</a>  | 554.2752  | 1106.5358 | 1106.5356 | 0.21  | 0 | 33   | 0.00056  | 1 | U | K.AGYEEIAQR.S                                                   |
| <a href="#">3077</a>  | 597.3118  | 1192.6091 | 1192.6088 | 0.28  | 0 | 62   | 1.8e-006 | 1 | U | K.YEELQVTVGR.H                                                  |
| <a href="#">3081</a>  | 398.8752  | 1193.6039 | 1193.6040 | -0.12 | 2 | 52   | 1e-005   | 1 | U | K.KYEDENK.R.T                                                   |
| <a href="#">3105</a>  | 599.2782  | 1196.5419 | 1196.5422 | -0.25 | 0 | 50   | 2.1e-005 | 1 | U | K.GSGISGGGYSGGGK.H                                              |
| <a href="#">3179</a>  | 604.8117  | 1207.6089 | 1207.6085 | 0.37  | 0 | 69   | 1.9e-007 | 1 | U | R.TAAENDFVTLK.K                                                 |
| <a href="#">3574</a>  | 627.8074  | 1253.6002 | 1253.6001 | 0.12  | 0 | 87   | 4.9e-009 | 1 | U | R.GFSSGSAAVSSGGR.R                                              |
| <a href="#">3637</a>  | 632.3506  | 1262.6865 | 1262.6870 | -0.38 | 0 | 70   | 2.4e-007 | 1 | U | K.LALDVEIATYR.K                                                 |
| <a href="#">4119</a>  | 660.7949  | 1319.5752 | 1319.5756 | -0.30 | 0 | 66   | 5e-007   | 1 | U | R.HGGGGGGGGGGFGR.S                                              |
| <a href="#">4120</a>  | 440.8659  | 1319.5760 | 1319.5756 | 0.29  | 0 | (37) | 0.00038  | 1 | U | R.HGGGGGGGGGGFGR.S                                              |
| <a href="#">4195</a>  | 665.3235  | 1328.6325 | 1328.6320 | 0.33  | 0 | 75   | 5.6e-008 | 1 | U | K.NVQDAIADAEQR.G                                                |
| <a href="#">4196</a>  | 665.3667  | 1328.7188 | 1328.7187 | 0.05  | 0 | 68   | 4.6e-007 | 1 | U | R.NLDLDSIAEVK.A                                                 |
| <a href="#">4261</a>  | 668.8601  | 1335.7057 | 1335.7034 | 1.70  | 1 | 61   | 1.5e-006 | 1 | U | R.TAAENDFVTLK.D                                                 |
| <a href="#">4489</a>  | 686.3592  | 1370.7037 | 1370.7041 | -0.27 | 0 | 77   | 4.2e-008 | 1 | U | K.LNDLEALQQAQ.E                                                 |
| <a href="#">4631</a>  | 696.3438  | 1390.6730 | 1390.6728 | 0.13  | 1 | 65   | 5.6e-007 | 1 | U | R.SKEEAALYHSK.Y                                                 |
| <a href="#">4632</a>  | 464.5649  | 1390.6730 | 1390.6728 | 0.13  | 1 | (34) | 0.00074  | 1 | U | R.SKEEAALYHSK.Y                                                 |
| <a href="#">5150</a>  | 730.9034  | 1459.7922 | 1459.7922 | -0.01 | 0 | 76   | 4.4e-008 | 1 | U | K.VDLLNQEIFLKV.V                                                |
| <a href="#">5311</a>  | 738.3940  | 1474.7734 | 1474.7780 | -3.10 | 0 | 83   | 1.1e-008 | 1 | U | R.FLEQQNVLTQK.W                                                 |
| <a href="#">8274</a>  | 919.9613  | 1837.9080 | 1837.9072 | 0.48  | 0 | 53   | 1.8e-005 | 1 | U | K.SISISVAGGGGGFAGGGFGR.G                                        |
| <a href="#">9947</a>  | 752.6867  | 2255.0382 | 2255.0376 | 0.29  | 1 | (32) | 0.0029   | 1 | U | R.TSQNSELNMQDLVEDYKK.K                                          |
| <a href="#">9995</a>  | 758.0187  | 2271.0343 | 2271.0325 | 0.79  | 1 | 43   | 0.00021  | 1 | U | R.TSQNSELNMQDLVEDYKK.K                                          |
| <a href="#">11747</a> | 1016.8360 | 3047.4860 | 3047.4870 | -0.31 | 0 | 56   | 1.7e-005 | 1 | U | K.VLYDAEISQIHQSVTDTNVLISMDNSR.N <a href="#">11748</a>           |
| <a href="#">11778</a> | 1022.1687 | 3063.4842 | 3063.4819 | 0.74  | 0 | (47) | 0.00012  | 1 | U | K.VLYDAEISQIHQSVTDTNVLISMDNSR.N                                 |
| <a href="#">13033</a> | 1023.7731 | 4091.0633 | 4091.0654 | -0.53 | 0 | 29   | 0.0075   | 1 | U | R.FGGGGPGVGGGLGGPGGGYGGIHEVSNQSLLOPLNVK.V <a href="#">13034</a> |

5. [!::sp|KIC9\\_HUMAN|](#) Mass: 62320 Score: 1205 Matches: 35(35) Sequences: 20(20) emPAI: 3.83

| Query                 | Observed  | Mr (expt) | Mr (calc) | ppm   | Miss | Score | Expect   | Rank | Unique | Peptide                                                        |
|-----------------------|-----------|-----------|-----------|-------|------|-------|----------|------|--------|----------------------------------------------------------------|
| <a href="#">428</a>   | 405.2240  | 808.4334  | 808.4330  | 0.45  | 0    | 30    | 0.00091  | 1    | U      | R.LASLQDK.V                                                    |
| <a href="#">432</a>   | 406.7533  | 811.4920  | 811.4916  | 0.52  | 1    | 57    | 1.8e-006 | 1    | U      | K.KGPAAIQK.N                                                   |
| <a href="#">841</a>   | 449.2103  | 896.4061  | 896.4062  | -0.08 | 0    | (19)  | 0.026    | 1    | U      | R.MTLDDFR.I                                                    |
| <a href="#">944</a>   | 457.2079  | 912.4012  | 912.4011  | 0.12  | 0    | 26    | 0.0029   | 1    | U      | R.MTLDDFR.I                                                    |
| <a href="#">1967</a>  | 530.7857  | 1059.5568 | 1059.5560 | 0.73  | 0    | 42    | 0.00011  | 1    | U      | K.TLLDIDNTR.M                                                  |
| <a href="#">2002</a>  | 533.2535  | 1064.4924 | 1064.4920 | 0.37  | 0    | 53    | 5.9e-006 | 1    | U      | K.STMQELNSR.L                                                  |
| <a href="#">2157</a>  | 541.2513  | 1080.4881 | 1080.4870 | 1.05  | 0    | (20)  | 0.017    | 1    | U      | K.STMQELNSR.L                                                  |
| <a href="#">2276</a>  | 365.8537  | 1094.5394 | 1094.5396 | -0.20 | 1    | 22    | 0.014    | 1    | U      | K.IDQWYDKK.G                                                   |
| <a href="#">2277</a>  | 548.2772  | 1094.5398 | 1094.5396 | 0.19  | 1    | (17)  | 0.043    | 1    | U      | K.IDQWYDKK.G                                                   |
| <a href="#">2485</a>  | 561.2961  | 1120.5777 | 1120.5764 | 1.17  | 0    | 35    | 0.00063  | 1    | U      | R.QEYEQLIQK.N                                                  |
| <a href="#">3176</a>  | 603.8054  | 1205.5962 | 1205.5962 | -0.01 | 0    | 41    | 0.00017  | 1    | U      | R.QVLDNLTMEK.S                                                 |
| <a href="#">3374</a>  | 616.8026  | 1231.5907 | 1231.5906 | 0.12  | 0    | 77    | 4.4e-008 | 1    | U      | R.SGGGGGGGLSGGGIR.S                                            |
| <a href="#">3395</a>  | 618.2678  | 1234.5210 | 1234.5215 | -0.36 | 0    | 63    | 9.9e-007 | 1    | U      | R.FSSSSGGGGSSR.V                                               |
| <a href="#">4018</a>  | 436.5639  | 1306.6697 | 1306.6703 | -0.46 | 1    | (26)  | 0.0065   | 1    | U      | R.IKFEMEQLR.Q                                                  |
| <a href="#">4148</a>  | 662.3401  | 1322.6656 | 1322.6652 | 0.27  | 1    | 41    | 0.00022  | 1    | U      | R.IKFEMEQLR.Q                                                  |
| <a href="#">4149</a>  | 441.8960  | 1322.6661 | 1322.6652 | 0.64  | 1    | (32)  | 0.002    | 1    | U      | R.IKFEMEQLR.Q <a href="#">4150</a>                             |
| <a href="#">6440</a>  | 529.5936  | 1585.7589 | 1585.7583 | 0.33  | 0    | (35)  | 0.00099  | 1    | U      | K.VQALEEANNLENK.I                                              |
| <a href="#">6441</a>  | 793.8869  | 1585.7592 | 1585.7583 | 0.57  | 0    | 80    | 2.9e-008 | 1    | U      | K.VQALEEANNLENK.I                                              |
| <a href="#">7877</a>  | 896.3674  | 1790.7203 | 1790.7205 | -0.08 | 0    | 97    | 3.7e-010 | 1    | U      | R.GSGSGSGGGGGGGGGSSR.G <a href="#">7875</a>                    |
| <a href="#">8272</a>  | 613.3267  | 1836.9582 | 1836.9581 | 0.07  | 0    | 39    | 0.00024  | 1    | U      | R.HGVQLEIEILOSLSK.K <a href="#">8273</a>                       |
| <a href="#">9752</a>  | 1102.0074 | 2202.0002 | 2202.0072 | -3.14 | 0    | 99    | 5.8e-010 | 1    | U      | K.SDLEMQYETLQELMALK.K <a href="#">9753</a>                     |
| <a href="#">9754</a>  | 735.0093  | 2202.0060 | 2202.0072 | -0.51 | 0    | (28)  | 0.0068   | 1    | U      | K.SDLEMQYETLQELMALK.K <a href="#">9755</a>                     |
| <a href="#">10589</a> | 837.3814  | 2509.1223 | 2509.1245 | -0.88 | 0    | 74    | 2.2e-007 | 1    | U      | K.EIETYHNLLEGGQEDFESSGAGK.I <a href="#">10590</a>              |
| <a href="#">11296</a> | 965.8013  | 2894.3820 | 2894.3828 | -0.30 | 1    | 55    | 1.8e-005 | 1    | U      | K.NHKEEMSQLTGQNSGDVNVINVPAGK.D                                 |
| <a href="#">11315</a> | 726.3582  | 2901.4039 | 2901.4032 | 0.22  | 1    | (22)  | 0.049    | 1    | U      | K.NYSPYYNTIDDLKQIVDLTVGNK.T                                    |
| <a href="#">11316</a> | 968.1420  | 2901.4042 | 2901.4032 | 0.35  | 1    | 40    | 0.00075  | 1    | U      | K.NYSPYYNTIDDLKQIVDLTVGNK.T                                    |
| <a href="#">12188</a> | 1075.0977 | 3222.2712 | 3222.2744 | -0.99 | 0    | 89    | 4.3e-009 | 1    | U      | R.GSGSGSHGGSGFSGSGSGSGGEEASGSGGGYGGGSK.S <a href="#">12189</a> |
| <a href="#">12291</a> | 1088.8422 | 3263.5047 | 3263.5066 | -0.58 | 0    | 92    | 5.2e-009 | 1    | U      | K.DIENQYETQITQIEHEVSSSGEYQSSAK.E                               |

6. [!::sp|HBB\\_HUMAN|](#) Mass: 15971 Score: 317 Matches: 10(10) Sequences: 7(7) emPAI: 7.10

| Query                | Observed  | Mr (expt) | Mr (calc) | ppm   | Miss | Score | Expect   | Rank | Unique | Peptide                  |
|----------------------|-----------|-----------|-----------|-------|------|-------|----------|------|--------|--------------------------|
| <a href="#">1070</a> | 466.7639  | 931.5132  | 931.5127  | 0.49  | 0    | 31    | 0.00097  | 1    | U      | K.SAVTALWGK.V            |
| <a href="#">1187</a> | 476.7583  | 951.5021  | 951.5025  | -0.45 | 0    | 22    | 0.0085   | 1    | U      | -.VHLTPEEK.S             |
| <a href="#">2532</a> | 563.7859  | 1125.5572 | 1125.5567 | 0.47  | 0    | 29    | 0.0025   | 1    | U      | K.LHVDPENFR.L            |
| <a href="#">2534</a> | 376.1931  | 1125.5576 | 1125.5567 | 0.76  | 0    | (21)  | 0.016    | 1    | U      | K.LHVDPENFR.L            |
| <a href="#">2745</a> | 383.8961  | 1148.6664 | 1148.6666 | -0.15 | 0    | (35)  | 0.00029  | 1    | U      | K.VVAGVANALAHK.Y         |
| <a href="#">2746</a> | 575.3408  | 1148.6671 | 1148.6666 | 0.48  | 0    | 72    | 6.3e-008 | 1    | U      | K.VVAGVANALAHK.Y         |
| <a href="#">3769</a> | 637.8674  | 1273.7202 | 1273.7183 | 1.52  | 0    | 40    | 0.00011  | 1    | U      | R.LLVVYPWTQR.F           |
| <a href="#">4552</a> | 689.8543  | 1377.6941 | 1377.6929 | 0.91  | 0    | 25    | 0.0065   | 1    | U      | K.EFTPPVQAAQK.V          |
| <a href="#">9218</a> | 1029.9782 | 2057.9418 | 2057.9405 | 0.65  | 0    | 95    | 1.6e-009 | 1    | U      | R.FFESFGDLSTPDVAVMGNPK.V |
| <a href="#">9282</a> | 1037.9748 | 2073.9350 | 2073.9354 | -0.20 | 0    | (82)  | 3e-008   | 1    | U      | R.FFESFGDLSTPDVAVMGNPK.V |

7. [!::sp|KIC15\\_SHEEP|](#) Mass: 48740 Score: 203 Matches: 6(6) Sequences: 6(6) emPAI: 0.69

| Query                | Observed | Mr (expt) | Mr (calc) | ppm   | Miss | Score | Expect   | Rank | Unique | Peptide          |
|----------------------|----------|-----------|-----------|-------|------|-------|----------|------|--------|------------------|
| <a href="#">419</a>  | 404.2030 | 806.3915  | 806.3923  | -0.98 | 0    | 42    | 8.9e-005 | 1    | U      | R.LAADDR.L       |
| <a href="#">959</a>  | 458.6957 | 915.3769  | 915.3756  | 1.39  | 0    | 25    | 0.0042   | 1    | U      | K.NHEEMK.E       |
| <a href="#">1436</a> | 495.2725 | 988.5305  | 988.5301  | 0.34  | 1    | 23    | 0.0093   | 1    | U      | K.SEITDLRR.T     |
| <a href="#">1751</a> | 516.3022 | 1030.5899 | 1030.5910 | -1.10 | 0    | 55    | 3.4e-006 | 1    | U      | R.VLDELTLTK.T    |
| <a href="#">3133</a> | 601.3123 | 1200.6100 | 1200.6098 | 0.13  | 0    | 62    | 1.5e-006 | 1    | U      | R.QSVEADINGLR.R  |
| <a href="#">3974</a> | 651.3328 | 1300.6511 | 1300.6510 | 0.09  | 0    | 68    | 3.3e-007 | 1    | U      | R.ALEEANADLEVK.I |

8. [3::POAA25|THIO\\_ECOLI|](#) Mass: 11913 Score: 181 Matches: 3(3) Sequences: 2(2) emPAI: 1.01

| Query                | Observed | Mr (expt) | Mr (calc) | ppm   | Miss | Score | Expect   | Rank | Unique | Peptide                                 |
|----------------------|----------|-----------|-----------|-------|------|-------|----------|------|--------|-----------------------------------------|
| <a href="#">3688</a> | 634.3356 | 1266.6566 | 1266.6568 | -0.15 | 0    | 82    | 1.3e-008 | 1    | U      | K.LNIDQNPATAP.Y                         |
| <a href="#">8057</a> | 903.4532 | 1804.8919 | 1804.8917 | 0.14  | 0    | 70    | 3.1e-007 | 1    | U      | K.MIAPILDEIAEYQK.L <a href="#">8056</a> |

|     |                                                                                                 |             |            |               |                 |             |       |          |      |        |                                                                                                                           |  |
|-----|-------------------------------------------------------------------------------------------------|-------------|------------|---------------|-----------------|-------------|-------|----------|------|--------|---------------------------------------------------------------------------------------------------------------------------|--|
| 9.  | <a href="#">1::sp HBA_HUMAN </a>                                                                | Mass: 15174 | Score: 172 | Matches: 7(7) | Sequences: 5(5) | emPAI: 4.19 |       |          |      |        |                                                                                                                           |  |
|     | sp HBA_HUMAN                                                                                    |             |            |               |                 |             |       |          |      |        |                                                                                                                           |  |
|     | Query                                                                                           | Observed    | Mr(expt)   | Mr(calc)      | ppm             | Miss        | Score | Expect   | Rank | Unique | Peptide                                                                                                                   |  |
|     | <a href="#">107</a>                                                                             | 365.2106    | 728.4067   | 728.4068      | -0.16           | 0           | 24    | 0.0037   | 1    | U      | - . VLSPADK. T                                                                                                            |  |
|     | <a href="#">2067</a>                                                                            | 536.2806    | 1070.5466  | 1070.5471     | -0.42           | 0           | 27    | 0.0026   | 1    | U      | R. MFLSFPTTK. T                                                                                                           |  |
|     | <a href="#">2206</a>                                                                            | 544.2784    | 1086.5422  | 1086.5420     | 0.18            | 0           | (16)  | 0.031    | 1    | U      | R. MFLSFPTTK. T                                                                                                           |  |
|     | <a href="#">3564</a>                                                                            | 626.8609    | 1251.7073  | 1251.7075     | -0.12           | 0           | 57    | 2.3e-006 | 1    | U      | K. FLASVSTVLTSK. Y                                                                                                        |  |
|     | <a href="#">5872</a>                                                                            | 765.3710    | 1528.7274  | 1528.7270     | 0.29            | 0           | 61    | 2.5e-006 | 1    | U      | K. VGAHAGEYGAEALER. M                                                                                                     |  |
|     | <a href="#">5873</a>                                                                            | 510.5832    | 1528.7277  | 1528.7270     | 0.45            | 0           | (54)  | 1.1e-005 | 1    | U      | K. VGAHAGEYGAEALER. M                                                                                                     |  |
|     | <a href="#">11687</a>                                                                           | 603.3031    | 3011.4789  | 3011.4771     | 0.62            | 0           | 25    | 0.018    | 1    | U      | K. VADALTNAVAHVDDMPNALSALSDLHAHK. L                                                                                       |  |
| 10. | <a href="#">1::sp TRYP_PIG </a>                                                                 | Mass: 25078 | Score: 169 | Matches: 7(7) | Sequences: 2(2) | emPAI: 0.40 |       |          |      |        |                                                                                                                           |  |
|     | sp TRYP_PIG                                                                                     |             |            |               |                 |             |       |          |      |        |                                                                                                                           |  |
|     | Query                                                                                           | Observed    | Mr(expt)   | Mr(calc)      | ppm             | Miss        | Score | Expect   | Rank | Unique | Peptide                                                                                                                   |  |
|     | <a href="#">585</a>                                                                             | 421.7587    | 841.5029   | 841.5022      | 0.92            | 0           | 49    | 1.3e-005 | 1    | U      | R. VATVSLPR. S <a href="#">582</a> <a href="#">583</a> <a href="#">584</a> <a href="#">586</a> <a href="#">587</a>        |  |
|     | <a href="#">1838</a>                                                                            | 523.2856    | 1044.5567  | 1044.5564     | 0.30            | 0           | 40    | 0.00019  | 1    | U      | K. LSSPATLSNR. V                                                                                                          |  |
| 11. | <a href="#">1::sp ALBU_BOVIN </a>                                                               | Mass: 71244 | Score: 91  | Matches: 6(6) | Sequences: 4(4) | emPAI: 0.27 |       |          |      |        |                                                                                                                           |  |
|     | sp ALBU_BOVIN                                                                                   |             |            |               |                 |             |       |          |      |        |                                                                                                                           |  |
|     | Query                                                                                           | Observed    | Mr(expt)   | Mr(calc)      | ppm             | Miss        | Score | Expect   | Rank | Unique | Peptide                                                                                                                   |  |
|     | <a href="#">357</a>                                                                             | 395.2398    | 788.4649   | 788.4644      | 0.73            | 0           | 16    | 0.024    | 1    | U      | K. LVTDLTK. V                                                                                                             |  |
|     | <a href="#">454</a>                                                                             | 409.7165    | 817.4184   | 817.4181      | 0.30            | 0           | 24    | 0.0041   | 1    | U      | K. ATEEQLK. T                                                                                                             |  |
|     | <a href="#">991</a>                                                                             | 461.7480    | 921.4815   | 921.4807      | 0.87            | 0           | 28    | 0.0021   | 1    | U      | K. AEFVEVTK. L <a href="#">990</a>                                                                                        |  |
|     | <a href="#">6751</a>                                                                            | 547.3176    | 1638.9311  | 1638.9305     | 0.35            | 1           | 33    | 0.00049  | 1    | U      | R. KVPQVSTPTLVEYSR. S <a href="#">6750</a>                                                                                |  |
| 12. | <a href="#">3::P76298 FLHA_ECOLI</a>                                                            | Mass: 74795 | Score: 61  | Matches: 8(8) | Sequences: 1(1) | emPAI: 0.06 |       |          |      |        |                                                                                                                           |  |
|     | Flagellar biosynthesis protein FlhA OS=Escherichia coli (strain K12) OX=83333 GN=flhA PE=3 SV=1 |             |            |               |                 |             |       |          |      |        |                                                                                                                           |  |
|     | Query                                                                                           | Observed    | Mr(expt)   | Mr(calc)      | ppm             | Miss        | Score | Expect   | Rank | Unique | Peptide                                                                                                                   |  |
|     | <a href="#">3650</a>                                                                            | 632.8196    | 1263.6245  | 1263.6159     | 6.86            | 1           | (17)  | 0.038    | 1    | U      | R. HIRMTAIGGK. - <a href="#">3645</a>                                                                                     |  |
|     | <a href="#">3666</a>                                                                            | 632.8199    | 1263.6253  | 1263.6159     | 7.43            | 1           | 25    | 0.0052   | 1    | U      | R. HIRMTAIGGK. - <a href="#">3653</a> <a href="#">3658</a> <a href="#">3660</a> <a href="#">3662</a> <a href="#">3668</a> |  |
| 13. | <a href="#">1::sp KRHB4_HUMAN </a>                                                              | Mass: 65938 | Score: 44  | Matches: 2(2) | Sequences: 2(2) | emPAI: 0.14 |       |          |      |        |                                                                                                                           |  |
|     | sp KRHB4_HUMAN                                                                                  |             |            |               |                 |             |       |          |      |        |                                                                                                                           |  |
|     | Query                                                                                           | Observed    | Mr(expt)   | Mr(calc)      | ppm             | Miss        | Score | Expect   | Rank | Unique | Peptide                                                                                                                   |  |
|     | <a href="#">514</a>                                                                             | 414.2188    | 826.4230   | 826.4225      | 0.61            | 0           | 33    | 0.00055  | 1    | U      | K. FASFIDK. V                                                                                                             |  |
|     | <a href="#">3637</a>                                                                            | 632.3506    | 1262.6865  | 1262.6870     | -0.38           | 0           | 26    | 0.0059   | 2    | U      | K. LGLDIEIATYR. R                                                                                                         |  |
| 14. | <a href="#">1::sp CASB_BOVIN </a>                                                               | Mass: 25148 | Score: 34  | Matches: 2(2) | Sequences: 1(1) | emPAI: 0.18 |       |          |      |        |                                                                                                                           |  |
|     | sp CASB_BOVIN                                                                                   |             |            |               |                 |             |       |          |      |        |                                                                                                                           |  |
|     | Query                                                                                           | Observed    | Mr(expt)   | Mr(calc)      | ppm             | Miss        | Score | Expect   | Rank | Unique | Peptide                                                                                                                   |  |
|     | <a href="#">9749</a>                                                                            | 734.7257    | 2201.1552  | 2201.1555     | -0.11           | 0           | 26    | 0.0079   | 1    | U      | R. DMPIQAFLLYQEPVLGPVR. G <a href="#">9750</a>                                                                            |  |
| 15. | <a href="#">1::sp RS27A_HUMAN </a>                                                              | Mass: 18296 | Score: 33  | Matches: 1(1) | Sequences: 1(1) | emPAI: 0.26 |       |          |      |        |                                                                                                                           |  |
|     | sp RS27A_HUMAN                                                                                  |             |            |               |                 |             |       |          |      |        |                                                                                                                           |  |
|     | Query                                                                                           | Observed    | Mr(expt)   | Mr(calc)      | ppm             | Miss        | Score | Expect   | Rank | Unique | Peptide                                                                                                                   |  |
|     | <a href="#">7847</a>                                                                            | 894.4674    | 1786.9203  | 1786.9200     | 0.18            | 0           | 33    | 0.0017   | 1    | U      | K. TITLEVEPSDTIENVK. A                                                                                                    |  |
| 16. | <a href="#">3::POAD96 LIVJ_ECOLI</a>                                                            | Mass: 39223 | Score: 31  | Matches: 1(1) | Sequences: 1(1) | emPAI: 0.11 |       |          |      |        |                                                                                                                           |  |
|     | Leu/Ile/Val-binding protein OS=Escherichia coli (strain K12) OX=83333 GN=livJ PE=1 SV=1         |             |            |               |                 |             |       |          |      |        |                                                                                                                           |  |
|     | Query                                                                                           | Observed    | Mr(expt)   | Mr(calc)      | ppm             | Miss        | Score | Expect   | Rank | Unique | Peptide                                                                                                                   |  |
|     | <a href="#">389</a>                                                                             | 400.7350    | 799.4555   | 799.4552      | 0.38            | 0           | 31    | 0.00082  | 1    | U      | K. QAVAVANK. V                                                                                                            |  |
|     | Proteins matching the same set of peptides:                                                     |             |            |               |                 |             |       |          |      |        |                                                                                                                           |  |
|     | <a href="#">3::P04816 LIVK_ECOLI</a>                                                            | Mass: 39468 | Score: 31  | Matches: 1(1) | Sequences: 1(1) |             |       |          |      |        |                                                                                                                           |  |
|     | Leucine-specific-binding protein OS=Escherichia coli (strain K12) OX=83333 GN=livK PE=1 SV=2    |             |            |               |                 |             |       |          |      |        |                                                                                                                           |  |
| 17. | <a href="#">3::P77211 CUSC_ECOLI</a>                                                            | Mass: 50410 | Score: 29  | Matches: 2(2) | Sequences: 1(1) | emPAI: 0.09 |       |          |      |        |                                                                                                                           |  |
|     | Cation efflux system protein CusC OS=Escherichia coli (strain K12) OX=83333 GN=cusc PE=1 SV=1   |             |            |               |                 |             |       |          |      |        |                                                                                                                           |  |
|     | Query                                                                                           | Observed    | Mr(expt)   | Mr(calc)      | ppm             | Miss        | Score | Expect   | Rank | Unique | Peptide                                                                                                                   |  |
|     | <a href="#">10192</a>                                                                           | 789.7587    | 2366.2542  | 2366.2706     | -6.93           | 1           | 25    | 0.0067   | 2    | U      | K. IEIPIFNAGRNOALDIAEIR. Q <a href="#">10193</a>                                                                          |  |
| 18. | <a href="#">3::P75882 GFCD_ECOLI</a>                                                            | Mass: 78923 | Score: 28  | Matches: 2(2) | Sequences: 1(1) | emPAI: 0.06 |       |          |      |        |                                                                                                                           |  |
|     | Uncharacterized lipoprotein Gfcd OS=Escherichia coli (strain K12) OX=83333 GN=gfcd PE=3 SV=1    |             |            |               |                 |             |       |          |      |        |                                                                                                                           |  |
|     | Query                                                                                           | Observed    | Mr(expt)   | Mr(calc)      | ppm             | Miss        | Score | Expect   | Rank | Unique | Peptide                                                                                                                   |  |
|     | <a href="#">1654</a>                                                                            | 509.2822    | 1016.5498  | 1016.5502     | -0.42           | 1           | 21    | 0.012    | 1    | U      | K. DKGATIDVAK. R <a href="#">1657</a>                                                                                     |  |
| 19. | <a href="#">3::Q06065 ATOC_ECOLI</a>                                                            | Mass: 52428 | Score: 25  | Matches: 2(2) | Sequences: 1(1) | emPAI: 0.08 |       |          |      |        |                                                                                                                           |  |
|     | Regulatory protein AtoC OS=Escherichia coli (strain K12) OX=83333 GN=atoC PE=1 SV=2             |             |            |               |                 |             |       |          |      |        |                                                                                                                           |  |
|     | Query                                                                                           | Observed    | Mr(expt)   | Mr(calc)      | ppm             | Miss        | Score | Expect   | Rank | Unique | Peptide                                                                                                                   |  |
|     | <a href="#">3665</a>                                                                            | 422.2156    | 1263.6251  | 1263.6203     | 3.84            | 1           | 22    | 0.011    | 1    | U      | R. MPMDG1KALK. E <a href="#">3640</a>                                                                                     |  |
| 20. | <a href="#">3::P62601 TREF_ECOLI</a>                                                            | Mass: 63828 | Score: 24  | Matches: 1(1) | Sequences: 1(1) | emPAI: 0.07 |       |          |      |        |                                                                                                                           |  |
|     | Cytoplasmic trehalase OS=Escherichia coli (strain K12) OX=83333 GN=tref PE=1 SV=1               |             |            |               |                 |             |       |          |      |        |                                                                                                                           |  |
|     | Query                                                                                           | Observed    | Mr(expt)   | Mr(calc)      | ppm             | Miss        | Score | Expect   | Rank | Unique | Peptide                                                                                                                   |  |
|     | <a href="#">6667</a>                                                                            | 812.4225    | 1622.8304  | 1622.8280     | 1.49            | 1           | 24    | 0.0088   | 1    | U      | K. LESAIANI\$ALKGK. E                                                                                                     |  |
| 21. | <a href="#">3::AOA7H2C767 AOA7H2C767_ECOLI</a>                                                  | Mass: 79935 | Score: 24  | Matches: 1(1) | Sequences: 1(1) | emPAI: 0.05 |       |          |      |        |                                                                                                                           |  |
|     | Chaperone protein ClpB OS=Escherichia coli (strain K12) OX=83333 GN=clpB PE=3 SV=1              |             |            |               |                 |             |       |          |      |        |                                                                                                                           |  |
|     | Query                                                                                           | Observed    | Mr(expt)   | Mr(calc)      | ppm             | Miss        | Score | Expect   | Rank | Unique | Peptide                                                                                                                   |  |
|     | <a href="#">349</a>                                                                             | 394.7112    | 787.4078   | 787.4075      | 0.28            | 0           | 24    | 0.0038   | 1    | U      | K. AELEQAK. I                                                                                                             |  |
|     | Proteins matching the same set of peptides:                                                     |             |            |               |                 |             |       |          |      |        |                                                                                                                           |  |
|     | <a href="#">3::P63284 CLPB_ECOLI</a>                                                            | Mass: 95697 | Score: 24  | Matches: 1(1) | Sequences: 1(1) |             |       |          |      |        |                                                                                                                           |  |
|     | Chaperone protein ClpB OS=Escherichia coli (strain K12) OX=83333 GN=clpB PE=1 SV=1              |             |            |               |                 |             |       |          |      |        |                                                                                                                           |  |
| 22. | <a href="#">3::P32719 ALSE_ECOLI</a>                                                            | Mass: 26263 | Score: 24  | Matches: 1(1) | Sequences: 1(1) | emPAI: 0.17 |       |          |      |        |                                                                                                                           |  |

|                                                                                                      |                                                                                      |          |           |           |       |       |        |        |        |                                              |
|------------------------------------------------------------------------------------------------------|--------------------------------------------------------------------------------------|----------|-----------|-----------|-------|-------|--------|--------|--------|----------------------------------------------|
| D-allulose-6-phosphate 3-epimerase OS=Escherichia coli (strain K12) OX=83333 GN=alsE PE=1 SV=1       |                                                                                      |          |           |           |       |       |        |        |        |                                              |
| Query                                                                                                | Observed                                                                             | Mr(expt) | Mr(calc)  | ppm       | Miss  | Score | Expect | Rank   | Unique | Peptide                                      |
|                                                                                                      | 6102                                                                                 | 776.3944 | 1550.7743 | 1550.7870 | -8.22 | 1     | 24     | 0.011  | 1      | U M.KI <del>S</del> PSLMC <del>M</del> DLK.F |
| <hr/>                                                                                                |                                                                                      |          |           |           |       |       |        |        |        |                                              |
| 23.                                                                                                  | 3::P76092 YNBC_ECOLI Mass: 65529 Score: 23 Matches: 1(1) Sequences: 1(1) emPAI: 0.07 |          |           |           |       |       |        |        |        |                                              |
| Uncharacterized protein YnbC OS=Escherichia coli (strain K12) OX=83333 GN=ybcC PE=1 SV=1             |                                                                                      |          |           |           |       |       |        |        |        |                                              |
| Query                                                                                                | Observed                                                                             | Mr(expt) | Mr(calc)  | ppm       | Miss  | Score | Expect | Rank   | Unique | Peptide                                      |
|                                                                                                      | 1025                                                                                 | 464.2502 | 926.4859  | 926.4830  | 3.20  | 2     | 23     | 0.0053 | 1      | U R.FMRK <del>A</del> MK.L                   |
| <hr/>                                                                                                |                                                                                      |          |           |           |       |       |        |        |        |                                              |
| 24.                                                                                                  | 3::Q46857 DKGA_ECOLI Mass: 31147 Score: 23 Matches: 1(1) Sequences: 1(1) emPAI: 0.15 |          |           |           |       |       |        |        |        |                                              |
| 2,5-diketo-D-gluconic acid reductase A OS=Escherichia coli (strain K12) OX=83333 GN=dkgA PE=1 SV=3   |                                                                                      |          |           |           |       |       |        |        |        |                                              |
| Query                                                                                                | Observed                                                                             | Mr(expt) | Mr(calc)  | ppm       | Miss  | Score | Expect | Rank   | Unique | Peptide                                      |
|                                                                                                      | 1058                                                                                 | 466.2459 | 930.4771  | 930.4844  | -7.83 | 0     | 23     | 0.0056 | 1      | U - <del>M</del> ANPTVIK.L                   |
| <hr/>                                                                                                |                                                                                      |          |           |           |       |       |        |        |        |                                              |
| 25.                                                                                                  | 3::POABH0 FTSA_ECOLI Mass: 45815 Score: 22 Matches: 1(1) Sequences: 1(1) emPAI: 0.10 |          |           |           |       |       |        |        |        |                                              |
| Cell division protein FtsA OS=Escherichia coli (strain K12) OX=83333 GN=ftsA PE=1 SV=1               |                                                                                      |          |           |           |       |       |        |        |        |                                              |
| Query                                                                                                | Observed                                                                             | Mr(expt) | Mr(calc)  | ppm       | Miss  | Score | Expect | Rank   | Unique | Peptide                                      |
|                                                                                                      | 6076                                                                                 | 774.3977 | 1546.7808 | 1546.7661 | 9.51  | 1     | 22     | 0.014  | 1      | U R.GMDKGGVNDLESVVK.C                        |
| <hr/>                                                                                                |                                                                                      |          |           |           |       |       |        |        |        |                                              |
| 26.                                                                                                  | 3::P12996 BIOB_ECOLI Mass: 39079 Score: 22 Matches: 1(1) Sequences: 1(1) emPAI: 0.11 |          |           |           |       |       |        |        |        |                                              |
| Biotin synthase OS=Escherichia coli (strain K12) OX=83333 GN=bioB PE=1 SV=2                          |                                                                                      |          |           |           |       |       |        |        |        |                                              |
| Query                                                                                                | Observed                                                                             | Mr(expt) | Mr(calc)  | ppm       | Miss  | Score | Expect | Rank   | Unique | Peptide                                      |
|                                                                                                      | 221                                                                                  | 379.7297 | 757.4448  | 757.4446  | 0.21  | 1     | 22     | 0.0074 | 1      | U K.VRDAGIK.V                                |
| <hr/>                                                                                                |                                                                                      |          |           |           |       |       |        |        |        |                                              |
| 27.                                                                                                  | 3::P39358 YJHG_ECOLI Mass: 70486 Score: 22 Matches: 1(1) Sequences: 1(1) emPAI: 0.06 |          |           |           |       |       |        |        |        |                                              |
| D-xylonate dehydratase YjhG OS=Escherichia coli (strain K12) OX=83333 GN=yjhG PE=1 SV=2              |                                                                                      |          |           |           |       |       |        |        |        |                                              |
| Query                                                                                                | Observed                                                                             | Mr(expt) | Mr(calc)  | ppm       | Miss  | Score | Expect | Rank   | Unique | Peptide                                      |
|                                                                                                      | 155                                                                                  | 372.7219 | 743.4292  | 743.4290  | 0.30  | 0     | 22     | 0.0063 | 1      | U K.VQTIGAR.F                                |
| <hr/>                                                                                                |                                                                                      |          |           |           |       |       |        |        |        |                                              |
| Proteins matching the same set of peptides:                                                          |                                                                                      |          |           |           |       |       |        |        |        |                                              |
| 3::P77596 YAGF_ECOLI Mass: 69926 Score: 22 Matches: 1(1) Sequences: 1(1)                             |                                                                                      |          |           |           |       |       |        |        |        |                                              |
| D-xylonate dehydratase YagF OS=Escherichia coli (strain K12) OX=83333 GN=yagF PE=1 SV=1              |                                                                                      |          |           |           |       |       |        |        |        |                                              |
| <hr/>                                                                                                |                                                                                      |          |           |           |       |       |        |        |        |                                              |
| 28.                                                                                                  | 3::P21361 YCI6_ECOLI Mass: 5999 Score: 21 Matches: 1(1) Sequences: 1(1) emPAI: 0.95  |          |           |           |       |       |        |        |        |                                              |
| Uncharacterized protein Yci6 OS=Escherichia coli (strain K12) OX=83333 GN=yci6 PE=3 SV=1             |                                                                                      |          |           |           |       |       |        |        |        |                                              |
| Query                                                                                                | Observed                                                                             | Mr(expt) | Mr(calc)  | ppm       | Miss  | Score | Expect | Rank   | Unique | Peptide                                      |
|                                                                                                      | 1251                                                                                 | 480.7448 | 959.4751  | 959.4785  | -3.53 | 1     | 21     | 0.013  | 1      | U K.KGGQSGGNK.S                              |
| <hr/>                                                                                                |                                                                                      |          |           |           |       |       |        |        |        |                                              |
| 29.                                                                                                  | 3::P12008 AROC_ECOLI Mass: 39341 Score: 20 Matches: 1(1) Sequences: 1(1) emPAI: 0.11 |          |           |           |       |       |        |        |        |                                              |
| Chorismate synthase OS=Escherichia coli (strain K12) OX=83333 GN=aroC PE=1 SV=4                      |                                                                                      |          |           |           |       |       |        |        |        |                                              |
| Query                                                                                                | Observed                                                                             | Mr(expt) | Mr(calc)  | ppm       | Miss  | Score | Expect | Rank   | Unique | Peptide                                      |
|                                                                                                      | 726                                                                                  | 436.2313 | 870.4480  | 870.4559  | -9.06 | 1     | 20     | 0.0094 | 1      | U R.REPDQVK.I                                |
| <hr/>                                                                                                |                                                                                      |          |           |           |       |       |        |        |        |                                              |
| 30.                                                                                                  | 3::P71242 WCAK_ECOLI Mass: 47598 Score: 20 Matches: 1(1) Sequences: 1(1) emPAI: 0.09 |          |           |           |       |       |        |        |        |                                              |
| Colanic acid biosynthesis protein WcaK OS=Escherichia coli (strain K12) OX=83333 GN=wcaK PE=3 SV=2   |                                                                                      |          |           |           |       |       |        |        |        |                                              |
| Query                                                                                                | Observed                                                                             | Mr(expt) | Mr(calc)  | ppm       | Miss  | Score | Expect | Rank   | Unique | Peptide                                      |
|                                                                                                      | 813                                                                                  | 445.7563 | 889.4980  | 889.4981  | -0.07 | 1     | 20     | 0.02   | 1      | U K.RSNITTAK.V                               |
| <hr/>                                                                                                |                                                                                      |          |           |           |       |       |        |        |        |                                              |
| 31.                                                                                                  | 3::P46891 COF_ECOLI Mass: 30750 Score: 20 Matches: 1(1) Sequences: 1(1) emPAI: 0.15  |          |           |           |       |       |        |        |        |                                              |
| HMP-PP phosphatase OS=Escherichia coli (strain K12) OX=83333 GN=cof PE=1 SV=2                        |                                                                                      |          |           |           |       |       |        |        |        |                                              |
| Query                                                                                                | Observed                                                                             | Mr(expt) | Mr(calc)  | ppm       | Miss  | Score | Expect | Rank   | Unique | Peptide                                      |
|                                                                                                      | 1234                                                                                 | 479.7369 | 957.4593  | 957.4572  | 2.21  | 0     | 20     | 0.024  | 1      | U R.YQI <del>I</del> DVK.K                   |
| <hr/>                                                                                                |                                                                                      |          |           |           |       |       |        |        |        |                                              |
| 32.                                                                                                  | 1::sp CYC_HUMAN  Mass: 11724 Score: 19 Matches: 1(1) Sequences: 1(1) emPAI: 0.42     |          |           |           |       |       |        |        |        |                                              |
| sp CYC_HUMAN                                                                                         |                                                                                      |          |           |           |       |       |        |        |        |                                              |
| Query                                                                                                | Observed                                                                             | Mr(expt) | Mr(calc)  | ppm       | Miss  | Score | Expect | Rank   | Unique | Peptide                                      |
|                                                                                                      | 5865                                                                                 | 764.8877 | 1527.7609 | 1527.7697 | -5.76 | 2     | 19     | 0.026  | 1      | U K.EERADLIA <del>Y</del> LKK.A              |
| <hr/>                                                                                                |                                                                                      |          |           |           |       |       |        |        |        |                                              |
| 33.                                                                                                  | 3::POA759 NAGR_ECOLI Mass: 29983 Score: 19 Matches: 1(1) Sequences: 1(1) emPAI: 0.15 |          |           |           |       |       |        |        |        |                                              |
| Glucosamine-6-phosphate deaminase OS=Escherichia coli (strain K12) OX=83333 GN=nagB PE=1 SV=1        |                                                                                      |          |           |           |       |       |        |        |        |                                              |
| Query                                                                                                | Observed                                                                             | Mr(expt) | Mr(calc)  | ppm       | Miss  | Score | Expect | Rank   | Unique | Peptide                                      |
|                                                                                                      | 6044                                                                                 | 386.9645 | 1543.8290 | 1543.8181 | 7.09  | 1     | 19     | 0.031  | 1      | U K.ALVEMHKAGOV <del>S</del> FK.H            |
| <hr/>                                                                                                |                                                                                      |          |           |           |       |       |        |        |        |                                              |
| 34.                                                                                                  | 3::POC018 RL18_ECOLI Score: 19 Matches: 1(1) Sequences: 1(1)                         |          |           |           |       |       |        |        |        |                                              |
| 50S ribosomal protein L18 OS=Escherichia coli (strain K12) OX=83333 GN=rp18 PE=1 SV=1                |                                                                                      |          |           |           |       |       |        |        |        |                                              |
| Query                                                                                                | Observed                                                                             | Mr(expt) | Mr(calc)  | ppm       | Miss  | Score | Expect | Rank   | Unique | Peptide                                      |
|                                                                                                      | 2276                                                                                 | 365.8537 | 1094.5394 | 1094.5485 | -8.29 | 1     | 19     | 0.029  | 2      | U R.KLOELGATR.L                              |
| <hr/>                                                                                                |                                                                                      |          |           |           |       |       |        |        |        |                                              |
| 35.                                                                                                  | 3::POA7V0 RS2_ECOLI Mass: 26784 Score: 19 Matches: 1(1) Sequences: 1(1) emPAI: 0.17  |          |           |           |       |       |        |        |        |                                              |
| 30S ribosomal protein S2 OS=Escherichia coli (strain K12) OX=83333 GN=rpsB PE=1 SV=2                 |                                                                                      |          |           |           |       |       |        |        |        |                                              |
| Query                                                                                                | Observed                                                                             | Mr(expt) | Mr(calc)  | ppm       | Miss  | Score | Expect | Rank   | Unique | Peptide                                      |
|                                                                                                      | 3937                                                                                 | 649.8182 | 1297.6219 | 1297.6192 | 2.08  | 1     | 19     | 0.025  | 1      | U - <del>M</del> ATVSMRD <del>M</del> LK.A   |
| <hr/>                                                                                                |                                                                                      |          |           |           |       |       |        |        |        |                                              |
| 36.                                                                                                  | 3::POACP5 GNTR_ECOLI Mass: 36570 Score: 19 Matches: 1(1) Sequences: 1(1) emPAI: 0.12 |          |           |           |       |       |        |        |        |                                              |
| HTH-type transcriptional regulator GntR OS=Escherichia coli (strain K12) OX=83333 GN=gntR PE=1 SV=1  |                                                                                      |          |           |           |       |       |        |        |        |                                              |
| Query                                                                                                | Observed                                                                             | Mr(expt) | Mr(calc)  | ppm       | Miss  | Score | Expect | Rank   | Unique | Peptide                                      |
|                                                                                                      | 647                                                                                  | 428.7662 | 855.5179  | 855.5178  | 0.09  | 0     | 19     | 0.014  | 1      | U R.LASVLT <del>P</del> R.E                  |
| <hr/>                                                                                                |                                                                                      |          |           |           |       |       |        |        |        |                                              |
| 37.                                                                                                  | 3::P32053 INTA_ECOLI Mass: 46736 Score: 19 Matches: 1(1) Sequences: 1(1) emPAI: 0.10 |          |           |           |       |       |        |        |        |                                              |
| Prophage integrase IntA OS=Escherichia coli (strain K12) OX=83333 GN=intA PE=1 SV=2                  |                                                                                      |          |           |           |       |       |        |        |        |                                              |
| Query                                                                                                | Observed                                                                             | Mr(expt) | Mr(calc)  | ppm       | Miss  | Score | Expect | Rank   | Unique | Peptide                                      |
|                                                                                                      | 705                                                                                  | 434.7535 | 867.4924  | 867.4926  | -0.32 | 0     | 19     | 0.014  | 1      | U K.AVQP <del>V</del> QAR.G                  |
| <hr/>                                                                                                |                                                                                      |          |           |           |       |       |        |        |        |                                              |
| 38.                                                                                                  | 3::P06149 DLD_ECOLI Mass: 64914 Score: 18 Matches: 1(1) Sequences: 1(1) emPAI: 0.07  |          |           |           |       |       |        |        |        |                                              |
| Quinone-dependent D-lactate dehydrogenase OS=Escherichia coli (strain K12) OX=83333 GN=dld PE=1 SV=3 |                                                                                      |          |           |           |       |       |        |        |        |                                              |
| Query                                                                                                | Observed                                                                             | Mr(expt) | Mr(calc)  | ppm       | Miss  | Score | Expect | Rank   | Unique | Peptide                                      |

|     |                                                                                                                                 |             |               |                 |                 |             |       |        |       |        |                         |
|-----|---------------------------------------------------------------------------------------------------------------------------------|-------------|---------------|-----------------|-----------------|-------------|-------|--------|-------|--------|-------------------------|
| 39. | <a href="#">3::POADT8 YGIW_ECOLI</a>                                                                                            | Mass: 23062 | Score: 18     | Matches: 2(2)   | Sequences: 2(2) | emPAI: 0.44 |       |        |       |        |                         |
|     | Uncharacterized protein YgiM OS=Escherichia coli (strain K12) OX=83333 GN=ygiM PE=3 SV=1                                        |             |               |                 |                 |             |       |        |       |        |                         |
|     | Query                                                                                                                           | Observed    | Mr(expt)      | Mr(calc)        | ppm             | Miss        | Score | Expect | Rank  | Unique | Peptide                 |
|     |                                                                                                                                 | 1798        | 521.2823      | 1040.5500       | 1040.5502       | -0.22       | 0     | 15     | 0.03  | 2      | U R.VPDLNQVK.T          |
|     |                                                                                                                                 | 2864        | 580.7947      | 1159.5748       | 1159.5721       | 2.38        | 0     | 16     | 0.03  | 2      | U K.VDAASVQLDDK.Q       |
| 40. | <a href="#">3::P63201 GADW_ECOLI</a>                                                                                            | Mass: 28353 | Score: 18     | Matches: 1(1)   | Sequences: 1(1) | emPAI: 0.16 |       |        |       |        |                         |
|     | HTH-type transcriptional regulator GadW OS=Escherichia coli (strain K12) OX=83333 GN=gadW PE=1 SV=1                             |             |               |                 |                 |             |       |        |       |        |                         |
|     | Query                                                                                                                           | Observed    | Mr(expt)      | Mr(calc)        | ppm             | Miss        | Score | Expect | Rank  | Unique | Peptide                 |
|     |                                                                                                                                 | 2909        | 389.8357      | 1166.4852       | 1166.4930       | -6.66       | 0     | 18     | 0.03  | 1      | U R.MYTSLSLIK.K         |
| 41. | <a href="#">3::P22106 ASN8_ECOLI</a>                                                                                            | Mass: 63075 | Score: 18     | Matches: 1(1)   | Sequences: 1(1) | emPAI: 0.07 |       |        |       |        |                         |
|     | Asparagine synthetase B [glutamine-hydrolyzing] OS=Escherichia coli (strain K12) OX=83333 GN=asnB PE=1 SV=3                     |             |               |                 |                 |             |       |        |       |        |                         |
|     | Query                                                                                                                           | Observed    | Mr(expt)      | Mr(calc)        | ppm             | Miss        | Score | Expect | Rank  | Unique | Peptide                 |
|     |                                                                                                                                 | 5635        | 753.8779      | 1505.7413       | 1505.7483       | -4.62       | 1     | 18     | 0.04  | 1      | U R.KLLALHMYDCAR.A      |
| 42. | <a href="#">3::P15029 FECO_ECOLI</a>                                                                                            | Mass: 34337 | Score: 18     | Matches: 1(1)   | Sequences: 1(1) | emPAI: 0.13 |       |        |       |        |                         |
|     | Fe(3+) dicitrate transport system permease protein FecD OS=Escherichia coli (strain K12) OX=83333 GN=fecD PE=1 SV=2             |             |               |                 |                 |             |       |        |       |        |                         |
|     | Query                                                                                                                           | Observed    | Mr(expt)      | Mr(calc)        | ppm             | Miss        | Score | Expect | Rank  | Unique | Peptide                 |
|     |                                                                                                                                 | 3234        | 406.2104      | 1215.6092       | 1215.6104       | -0.95       | 1     | 18     | 0.036 | 1      | U K.MLAKTHQPMK.L        |
| 43. | <a href="#">3::P21889 SYD_ECOLI</a>                                                                                             | Mass: 66157 | Score: 18     | Matches: 1(1)   | Sequences: 1(1) | emPAI: 0.07 |       |        |       |        |                         |
|     | Aspartate-tRNA ligase OS=Escherichia coli (strain K12) OX=83333 GN=aspS PE=1 SV=1                                               |             |               |                 |                 |             |       |        |       |        |                         |
|     | Query                                                                                                                           | Observed    | Mr(expt)      | Mr(calc)        | ppm             | Miss        | Score | Expect | Rank  | Unique | Peptide                 |
|     |                                                                                                                                 | 5028        | 724.3921      | 1446.7696       | 1446.7708       | -0.84       | 1     | 18     | 0.024 | 1      | U R.VAALRVPGGASLR.K     |
| 44. | <a href="#">3::P76104 RLHA_ECOLI</a>                                                                                            | Mass: 73170 | Score: 17     | Matches: 1(1)   | Sequences: 1(1) | emPAI: 0.06 |       |        |       |        |                         |
|     | 23S rRNA 5-hydroxycytidine C2501 synthase OS=Escherichia coli (strain K12) OX=83333 GN=rhA PE=1 SV=2                            |             |               |                 |                 |             |       |        |       |        |                         |
|     | Query                                                                                                                           | Observed    | Mr(expt)      | Mr(calc)        | ppm             | Miss        | Score | Expect | Rank  | Unique | Peptide                 |
|     |                                                                                                                                 | 221         | 379.7297      | 757.4448        | 757.4446        | 0.23        | 1     | 17     | 0.021 | 2      | U K.QAKGNIK.S           |
| 45. | <a href="#">3::P21893 REJG_ECOLI</a>                                                                                            | Mass: 63634 | Score: 17     | Matches: 1(1)   | Sequences: 1(1) | emPAI: 0.07 |       |        |       |        |                         |
|     | Single-stranded-DNA-specific exonuclease RecJ OS=Escherichia coli (strain K12) OX=83333 GN=recJ PE=1 SV=2                       |             |               |                 |                 |             |       |        |       |        |                         |
|     | Query                                                                                                                           | Observed    | Mr(expt)      | Mr(calc)        | ppm             | Miss        | Score | Expect | Rank  | Unique | Peptide                 |
|     |                                                                                                                                 | 2198        | 543.8047      | 1085.5947       | 1085.6015       | -6.24       | 1     | 17     | 0.034 | 1      | U R.MKQIQLR.R           |
| 46. | <a href="#">3::P38035 RTCR_ECOLI</a>                                                                                            | Mass: 60604 | Score: 17     | Matches: 1(1)   | Sequences: 1(1) | emPAI: 0.07 |       |        |       |        |                         |
|     | Transcriptional regulatory protein RtcR OS=Escherichia coli (strain K12) OX=83333 GN=rtcR PE=4 SV=2                             |             |               |                 |                 |             |       |        |       |        |                         |
|     | Query                                                                                                                           | Observed    | Mr(expt)      | Mr(calc)        | ppm             | Miss        | Score | Expect | Rank  | Unique | Peptide                 |
|     |                                                                                                                                 | 2864        | 580.7947      | 1159.5748       | 1159.5638       | 9.52        | 1     | 17     | 0.024 | 1      | U R.SRSLFELK.R          |
| 47. | <a href="#">3::P80645 SSUD_ECOLI</a>                                                                                            | Mass: 41768 | Score: 17     | Matches: 1(1)   | Sequences: 1(1) | emPAI: 0.11 |       |        |       |        |                         |
|     | Alkanesulfonate monooxygenase OS=Escherichia coli (strain K12) OX=83333 GN=ssuD PE=1 SV=3                                       |             |               |                 |                 |             |       |        |       |        |                         |
|     | Query                                                                                                                           | Observed    | Mr(expt)      | Mr(calc)        | ppm             | Miss        | Score | Expect | Rank  | Unique | Peptide                 |
|     |                                                                                                                                 | 292         | 387.7093      | 773.4040        | 773.4032        | 1.16        | 0     | 17     | 0.02  | 1      | U R.QAATLDR.L           |
| 48. | <a href="#">3::POAAJ8 HYBA_ECOLI</a>                                                                                            | Mass: 36949 | Score: 17     | Matches: 1(1)   | Sequences: 1(1) | emPAI: 0.12 |       |        |       |        |                         |
|     | Hydrogenase-2 operon protein HybA OS=Escherichia coli (strain K12) OX=83333 GN=hybA PE=3 SV=1                                   |             |               |                 |                 |             |       |        |       |        |                         |
|     | Query                                                                                                                           | Observed    | Mr(expt)      | Mr(calc)        | ppm             | Miss        | Score | Expect | Rank  | Unique | Peptide                 |
|     |                                                                                                                                 | 1068        | 466.7434      | 931.4723        | 931.4763        | -4.37       | 0     | 17     | 0.028 | 1      | U K.TGIVHYDK.D          |
| 49. | <a href="#">3::P77330 BORD_ECOLI</a>                                                                                            | Mass: 10612 | Score: 17     | Matches: 1(1)   | Sequences: 1(1) | emPAI: 0.47 |       |        |       |        |                         |
|     | Prophage lipoprotein Bor homolog OS=Escherichia coli (strain K12) OX=83333 GN=borD PE=3 SV=1                                    |             |               |                 |                 |             |       |        |       |        |                         |
|     | Query                                                                                                                           | Observed    | Mr(expt)      | Mr(calc)        | ppm             | Miss        | Score | Expect | Rank  | Unique | Peptide                 |
|     |                                                                                                                                 | 128         | 366.7161      | 731.4177        | 731.4177        | -0.10       | 1     | 17     | 0.022 | 1      | U K.KTVDAAK.I           |
| 50. | <a href="#">3::Q46901 CSEI_ECOLI</a>                                                                                            | Mass: 56493 | Score: 17     | Matches: 1(1)   | Sequences: 1(1) | emPAI: 0.08 |       |        |       |        |                         |
|     | CRISPR system Cascade subunit CasA OS=Escherichia coli (strain K12) OX=83333 GN=casA PE=1 SV=1                                  |             |               |                 |                 |             |       |        |       |        |                         |
|     | Query                                                                                                                           | Observed    | Mr(expt)      | Mr(calc)        | ppm             | Miss        | Score | Expect | Rank  | Unique | Peptide                 |
|     |                                                                                                                                 | 8915        | 654.0380      | 1959.0921       | 1959.0918       | 0.16        | 1     | 17     | 0.023 | 1      | U R.GIDLRSTVLLNVLILPR.L |
| 51. | <a href="#">3::POAA43 RSUA_ECOLI</a>                                                                                            | Mass: 25963 | Score: 17     | Matches: 1(1)   | Sequences: 1(1) | emPAI: 0.18 |       |        |       |        |                         |
|     | Ribosomal small subunit pseudouridine synthase A OS=Escherichia coli (strain K12) OX=83333 GN=rsuA PE=1 SV=1                    |             |               |                 |                 |             |       |        |       |        |                         |
|     | Query                                                                                                                           | Observed    | Mr(expt)      | Mr(calc)        | ppm             | Miss        | Score | Expect | Rank  | Unique | Peptide                 |
|     |                                                                                                                                 | 295         | 388.2185      | 774.4225        | 774.4236        | -1.35       | 0     | 17     | 0.022 | 1      | U R.LTISEGR.Y           |
| 52. | <a href="#">3::P45522 KEFB_ECOLI</a>                                                                                            | Mass: 66482 | Score: 17     | Matches: 1(1)   | Sequences: 1(1) | emPAI: 0.07 |       |        |       |        |                         |
|     | Glutathione-regulated potassium-efflux system protein KefB OS=Escherichia coli (strain K12) OX=83333 GN=kefB PE=3 SV=1          |             |               |                 |                 |             |       |        |       |        |                         |
|     | Query                                                                                                                           | Observed    | Mr(expt)      | Mr(calc)        | ppm             | Miss        | Score | Expect | Rank  | Unique | Peptide                 |
|     |                                                                                                                                 | 2418        | 557.2803      | 1112.5461       | 1112.5413       | 4.32        | 1     | 17     | 0.049 | 1      | U K.MRIIVLER.D          |
| 53. | <a href="#">3::P77337 YDIS_ECOLI</a>                                                                                            | Score: 16   | Matches: 1(1) | Sequences: 1(1) |                 |             |       |        |       |        |                         |
|     | Probable electron transfer flavoprotein-quinone oxidoreductase YdiS OS=Escherichia coli (strain K12) OX=83333 GN=ydiS PE=3 SV=1 |             |               |                 |                 |             |       |        |       |        |                         |
|     | Query                                                                                                                           | Observed    | Mr(expt)      | Mr(calc)        | ppm             | Miss        | Score | Expect | Rank  | Unique | Peptide                 |
|     |                                                                                                                                 | 1058        | 466.2459      | 930.4771        | 930.4779        | -0.81       | 1     | 16     | 0.023 | 2      | U K.MIMGHAKK.I          |
| 54. | <a href="#">3::POAEX9 MALE_ECOLI</a>                                                                                            | Mass: 43360 | Score: 16     | Matches: 1(1)   | Sequences: 1(1) | emPAI: 0.10 |       |        |       |        |                         |
|     | Maltose/maltodextrin-binding periplasmic protein OS=Escherichia coli (strain K12) OX=83333 GN=male PE=1 SV=1                    |             |               |                 |                 |             |       |        |       |        |                         |
|     | Query                                                                                                                           | Observed    | Mr(expt)      | Mr(calc)        | ppm             | Miss        | Score | Expect | Rank  | Unique | Peptide                 |
|     |                                                                                                                                 | 879         | 452.2427      | 902.4709        | 902.4709        | -0.01       | 0     | 16     | 0.045 | 1      | U R.OTVDEALK.D          |
| 55. | <a href="#">3::P33668 YBBC_ECOLI</a>                                                                                            | Mass: 14257 | Score: 16     | Matches: 1(1)   | Sequences: 1(1) | emPAI: 0.34 |       |        |       |        |                         |
|     | Uncharacterized protein YbcC OS=Escherichia coli (strain K12) OX=83333 GN=ybcC PE=2 SV=1                                        |             |               |                 |                 |             |       |        |       |        |                         |

| Query                                                                                      | Observed                                                                                                                                                                                                         | Mr(expt)  | Mr(calc)      | ppm             | Miss | Score | Expect | Rank | Unique | Peptide           |
|--------------------------------------------------------------------------------------------|------------------------------------------------------------------------------------------------------------------------------------------------------------------------------------------------------------------|-----------|---------------|-----------------|------|-------|--------|------|--------|-------------------|
| 1662                                                                                       | 509.7492                                                                                                                                                                                                         | 1017.4839 | 1017.4896     | -5.57           | 1    | 16    | 0.035  | 1    | U      | K.YSVKIVK.T       |
| <hr/>                                                                                      |                                                                                                                                                                                                                  |           |               |                 |      |       |        |      |        |                   |
| 56.                                                                                        | 3::P02921 MF1B_ECOLI Mass: 52830 Score: 16 Matches: 1(1) Sequences: 1(1) emPAI: 0.08<br>Melibiose carrier protein OS=Escherichia coli (strain K12) OX=83333 GN=me1B PE=1 SV=2                                    |           |               |                 |      |       |        |      |        |                   |
| Query                                                                                      | Observed                                                                                                                                                                                                         | Mr(expt)  | Mr(calc)      | ppm             | Miss | Score | Expect | Rank | Unique | Peptide           |
| 1207                                                                                       | 478.7239                                                                                                                                                                                                         | 955.4331  | 955.4354      | -2.40           | 0    | 16    | 0.035  | 1    | U      | -_MSISITTK.L      |
| <hr/>                                                                                      |                                                                                                                                                                                                                  |           |               |                 |      |       |        |      |        |                   |
| 57.                                                                                        | 3::P64622 YHDV_ECOLI Score: 16 Matches: 1(1) Sequences: 1(1)<br>Uncharacterized protein YhdV OS=Escherichia coli (strain K12) OX=83333 GN=yhdV PE=3 SV=1                                                         |           |               |                 |      |       |        |      |        |                   |
| Query                                                                                      | Observed                                                                                                                                                                                                         | Mr(expt)  | Mr(calc)      | ppm             | Miss | Score | Expect | Rank | Unique | Peptide           |
| 3121                                                                                       | 600.2544                                                                                                                                                                                                         | 1198.4942 | 1198.4876     | 5.50            | 0    | 16    | 0.037  | 4    | U      | R.LVHINTCK.G      |
| <hr/>                                                                                      |                                                                                                                                                                                                                  |           |               |                 |      |       |        |      |        |                   |
| 58.                                                                                        | 3::P20966 PTFBC_ECOLI Mass: 57824 Score: 16 Matches: 1(1) Sequences: 1(1) emPAI: 0.08<br>PTS system fructose-specific E11B'BC component OS=Escherichia coli (strain K12) OX=83333 GN=fruA PE=1 SV=1              |           |               |                 |      |       |        |      |        |                   |
| Query                                                                                      | Observed                                                                                                                                                                                                         | Mr(expt)  | Mr(calc)      | ppm             | Miss | Score | Expect | Rank | Unique | Peptide           |
| 407                                                                                        | 402.7088                                                                                                                                                                                                         | 803.4029  | 803.4025      | 0.58            | 0    | 16    | 0.025  | 1    | U      | K.TAQELDK.A       |
| <hr/>                                                                                      |                                                                                                                                                                                                                  |           |               |                 |      |       |        |      |        |                   |
| 59.                                                                                        | 3::P08331 CPDB_ECOLI Mass: 70902 Score: 16 Matches: 1(1) Sequences: 1(1) emPAI: 0.06<br>2',3'-cyclic-nucleotide 2'-phosphodiesterase/3'-nucleotidase OS=Escherichia coli (strain K12) OX=83333 GN=cpdB PE=1 SV=2 |           |               |                 |      |       |        |      |        |                   |
| Query                                                                                      | Observed                                                                                                                                                                                                         | Mr(expt)  | Mr(calc)      | ppm             | Miss | Score | Expect | Rank | Unique | Peptide           |
| 3570                                                                                       | 627.3347                                                                                                                                                                                                         | 1252.6548 | 1252.6526     | 1.82            | 0    | 16    | 0.038  | 1    | U      | K.QPWFPTPYLIK.D   |
| <hr/>                                                                                      |                                                                                                                                                                                                                  |           |               |                 |      |       |        |      |        |                   |
| 60.                                                                                        | 3::P12999 B10C_ECOLI Mass: 28373 Score: 16 Matches: 1(1) Sequences: 1(1) emPAI: 0.16<br>Malonyl-[acyl-carrier protein] O-methyltransferase OS=Escherichia coli (strain K12) OX=83333 GN=bioC PE=1 SV=2           |           |               |                 |      |       |        |      |        |                   |
| Query                                                                                      | Observed                                                                                                                                                                                                         | Mr(expt)  | Mr(calc)      | ppm             | Miss | Score | Expect | Rank | Unique | Peptide           |
| 6002                                                                                       | 514.6168                                                                                                                                                                                                         | 1540.8286 | 1540.8395     | -7.10           | 1    | 16    | 0.041  | 1    | U      | R.QSADALLAMLPRK.Y |
| <hr/>                                                                                      |                                                                                                                                                                                                                  |           |               |                 |      |       |        |      |        |                   |
| 61.                                                                                        | 3::P0A696 SECE_ECOLI Mass: 13635 Score: 16 Matches: 1(1) Sequences: 1(1) emPAI: 0.36<br>Protein translocase subunit SecE OS=Escherichia coli (strain K12) OX=83333 GN=secE PE=1 SV=1                             |           |               |                 |      |       |        |      |        |                   |
| Query                                                                                      | Observed                                                                                                                                                                                                         | Mr(expt)  | Mr(calc)      | ppm             | Miss | Score | Expect | Rank | Unique | Peptide           |
| 1550                                                                                       | 503.3085                                                                                                                                                                                                         | 1004.6024 | 1004.6019     | 0.56            | 0    | 16    | 0.026  | 1    | U      | R.LVSFITGLR.F     |
| <hr/>                                                                                      |                                                                                                                                                                                                                  |           |               |                 |      |       |        |      |        |                   |
| 62.                                                                                        | 3::P14900 MURD_ECOLI Mass: 47343 Score: 16 Matches: 1(1) Sequences: 1(1) emPAI: 0.09<br>UDP-N-acetylmuramylalanine--D-glutamate ligase OS=Escherichia coli (strain K12) OX=83333 GN=murD PE=1 SV=3               |           |               |                 |      |       |        |      |        |                   |
| Query                                                                                      | Observed                                                                                                                                                                                                         | Mr(expt)  | Mr(calc)      | ppm             | Miss | Score | Expect | Rank | Unique | Peptide           |
| 2584                                                                                       | 566.3040                                                                                                                                                                                                         | 1130.5934 | 1130.5866     | 5.95            | 1    | 16    | 0.042  | 1    | U      | R.GVTPRVMDTR.M    |
| <hr/>                                                                                      |                                                                                                                                                                                                                  |           |               |                 |      |       |        |      |        |                   |
| 63.                                                                                        | 3::P28249 ASMA_ECOLI Mass: 68977 Score: 16 Matches: 1(1) Sequences: 1(1) emPAI: 0.06<br>Protein AsmA OS=Escherichia coli (strain K12) OX=83333 GN=asmA PE=3 SV=2                                                 |           |               |                 |      |       |        |      |        |                   |
| Query                                                                                      | Observed                                                                                                                                                                                                         | Mr(expt)  | Mr(calc)      | ppm             | Miss | Score | Expect | Rank | Unique | Peptide           |
| 4032                                                                                       | 654.8453                                                                                                                                                                                                         | 1307.6760 | 1307.6738     | 1.71            | 0    | 16    | 0.05   | 1    | U      | R.LENVEIGILK.A    |
| <hr/>                                                                                      |                                                                                                                                                                                                                  |           |               |                 |      |       |        |      |        |                   |
| 64.                                                                                        | 3::P0ADF6 EDD_ECOLI Mass: 65054 Score: 16 Matches: 1(1) Sequences: 1(1) emPAI: 0.07<br>Phosphogluconate dehydratase OS=Escherichia coli (strain K12) OX=83333 GN=edd PE=1 SV=1                                   |           |               |                 |      |       |        |      |        |                   |
| Query                                                                                      | Observed                                                                                                                                                                                                         | Mr(expt)  | Mr(calc)      | ppm             | Miss | Score | Expect | Rank | Unique | Peptide           |
| 2                                                                                          | 350.1560                                                                                                                                                                                                         | 698.2974  | 698.3000      | -3.72           | 0    | 16    | 0.027  | 1    | U      | R.LSGASGK.V       |
| <hr/>                                                                                      |                                                                                                                                                                                                                  |           |               |                 |      |       |        |      |        |                   |
| 65.                                                                                        | 3::P0AD65 MRDA_ECOLI Mass: 70812 Score: 16 Matches: 2(2) Sequences: 1(1) emPAI: 0.06<br>Peptidoglycan D,D-transpeptidase MrdA OS=Escherichia coli (strain K12) OX=83333 GN=mrda PE=1 SV=1                        |           |               |                 |      |       |        |      |        |                   |
| Query                                                                                      | Observed                                                                                                                                                                                                         | Mr(expt)  | Mr(calc)      | ppm             | Miss | Score | Expect | Rank | Unique | Peptide           |
| 296                                                                                        | 388.2198                                                                                                                                                                                                         | 774.4250  | 774.4276      | -3.29           | 0    | 14    | 0.037  | 1    | U      | R.FPGVEVK.G 295   |
| <hr/>                                                                                      |                                                                                                                                                                                                                  |           |               |                 |      |       |        |      |        |                   |
| 66.                                                                                        | 3::P0A6N8 EPLP_ECOLI Mass: 21519 Score: 16 Matches: 1(1) Sequences: 1(1) emPAI: 0.22<br>Elongation factor P-like protein OS=Escherichia coli (strain K12) OX=83333 GN=yeiP PE=1 SV=1                             |           |               |                 |      |       |        |      |        |                   |
| Query                                                                                      | Observed                                                                                                                                                                                                         | Mr(expt)  | Mr(calc)      | ppm             | Miss | Score | Expect | Rank | Unique | Peptide           |
| 2199                                                                                       | 362.8725                                                                                                                                                                                                         | 1085.5957 | 1085.6015     | -5.34           | 2    | 16    | 0.048  | 1    | U      | -_MPRANEIKK.G     |
| <hr/>                                                                                      |                                                                                                                                                                                                                  |           |               |                 |      |       |        |      |        |                   |
| 67.                                                                                        | 3::P43329 HRPA_ECOLI Mass: 149448 Score: 16 Matches: 1(1) Sequences: 1(1) emPAI: 0.03<br>ATP-dependent RNA helicase HrpA OS=Escherichia coli (strain K12) OX=83333 GN=hrpA PE=1 SV=3                             |           |               |                 |      |       |        |      |        |                   |
| Query                                                                                      | Observed                                                                                                                                                                                                         | Mr(expt)  | Mr(calc)      | ppm             | Miss | Score | Expect | Rank | Unique | Peptide           |
| 2485                                                                                       | 561.2961                                                                                                                                                                                                         | 1120.5777 | 1120.5798     | -1.84           | 1    | 16    | 0.05   | 2    | U      | K.SMLIKEGAEK.I    |
| <hr/>                                                                                      |                                                                                                                                                                                                                  |           |               |                 |      |       |        |      |        |                   |
| 68.                                                                                        | 3::P0AGD7 SRP54_ECOLI Mass: 49812 Score: 16 Matches: 1(1) Sequences: 1(1) emPAI: 0.09<br>Signal recognition particle protein OS=Escherichia coli (strain K12) OX=83333 GN=ffh PE=1 SV=1                          |           |               |                 |      |       |        |      |        |                   |
| Query                                                                                      | Observed                                                                                                                                                                                                         | Mr(expt)  | Mr(calc)      | ppm             | Miss | Score | Expect | Rank | Unique | Peptide           |
| 1595                                                                                       | 505.7787                                                                                                                                                                                                         | 1009.5428 | 1009.5412     | 1.58            | 3    | 16    | 0.032  | 1    | U      | K.KMKGGMAK.M      |
| <hr/>                                                                                      |                                                                                                                                                                                                                  |           |               |                 |      |       |        |      |        |                   |
| 69.                                                                                        | 3::P0AFA2 NARX_ECOLI Mass: 67669 Score: 15 Matches: 1(1) Sequences: 1(1) emPAI: 0.07<br>Nitrate/nitrite sensor protein NarX OS=Escherichia coli (strain K12) OX=83333 GN=narX PE=1 SV=1                          |           |               |                 |      |       |        |      |        |                   |
| Query                                                                                      | Observed                                                                                                                                                                                                         | Mr(expt)  | Mr(calc)      | ppm             | Miss | Score | Expect | Rank | Unique | Peptide           |
| 202                                                                                        | 378.2058                                                                                                                                                                                                         | 754.3971  | 754.3973      | -0.36           | 0    | 15    | 0.029  | 1    | U      | K.TAGLEHK.N       |
| <hr/>                                                                                      |                                                                                                                                                                                                                  |           |               |                 |      |       |        |      |        |                   |
| 70.                                                                                        | 3::P0ACL0 GLPR_ECOLI Mass: 28087 Score: 15 Matches: 1(1) Sequences: 1(1) emPAI: 0.16<br>Glycerol-3-phosphate regulon repressor OS=Escherichia coli (strain K12) OX=83333 GN=g1pR PE=1 SV=1                       |           |               |                 |      |       |        |      |        |                   |
| Query                                                                                      | Observed                                                                                                                                                                                                         | Mr(expt)  | Mr(calc)      | ppm             | Miss | Score | Expect | Rank | Unique | Peptide           |
| 416                                                                                        | 403.7019                                                                                                                                                                                                         | 805.3892  | 805.3817      | 9.29            | 0    | 15    | 0.03   | 1    | U      | K.ATQTEEK.E       |
| <hr/>                                                                                      |                                                                                                                                                                                                                  |           |               |                 |      |       |        |      |        |                   |
| Proteins matching the same set of peptides:                                                |                                                                                                                                                                                                                  |           |               |                 |      |       |        |      |        |                   |
| 3::P23840 DIND_ECOLI                                                                       | Mass: 31173                                                                                                                                                                                                      | Score: 15 | Matches: 1(1) | Sequences: 1(1) |      |       |        |      |        |                   |
| DNA damage-inducible protein D OS=Escherichia coli (strain K12) OX=83333 GN=dinD PE=4 SV=1 |                                                                                                                                                                                                                  |           |               |                 |      |       |        |      |        |                   |
| <hr/>                                                                                      |                                                                                                                                                                                                                  |           |               |                 |      |       |        |      |        |                   |
| 71.                                                                                        | 3::P33136 OPGG_ECOLI Mass: 57876 Score: 15 Matches: 1(1) Sequences: 1(1) emPAI: 0.08<br>Glucans biosynthesis protein G OS=Escherichia coli (strain K12) OX=83333 GN=mDoG PE=1 SV=1                               |           |               |                 |      |       |        |      |        |                   |
| Query                                                                                      | Observed                                                                                                                                                                                                         | Mr(expt)  | Mr(calc)      | ppm             | Miss | Score | Expect | Rank | Unique | Peptide           |
| 399                                                                                        | 401.7250                                                                                                                                                                                                         | 801.4355  | 801.4344      | 1.27            | 0    | 15    | 0.042  | 1    | U      | K.QAOSLAGK.G      |



|                                                                                                                                          |                                       |              |           |               |                 |                                  |
|------------------------------------------------------------------------------------------------------------------------------------------|---------------------------------------|--------------|-----------|---------------|-----------------|----------------------------------|
| 72.                                                                                                                                      | <a href="#">3::POA7R9 RS11_ECOLI</a>  | Mass: 13950  | Score: 15 | Matches: 1(1) | Sequences: 1(1) | emPAI: 0.35                      |
| 30S ribosomal protein S11 OS=Escherichia coli (strain K12) OX=83333 GN=rpsK PE=1 SV=2                                                    |                                       |              |           |               |                 |                                  |
| Query                                                                                                                                    | Observed                              | Mr (expt)    | Mr (calc) | ppm           | Miss            | Score Expect Rank Unique Peptide |
|                                                                                                                                          | <a href="#">340</a>                   | 393.7397     | 785.4648  | 785.4581      | 8.53            | 1 15 0.032 1 U -.MAKAPIR.A       |
| 73.                                                                                                                                      | <a href="#">3::P25772 LIGB_ECOLI</a>  | Mass: 63425  | Score: 15 | Matches: 1(1) | Sequences: 1(1) | emPAI: 0.07                      |
| DNA ligase B OS=Escherichia coli (strain K12) OX=83333 GN=ligB PE=1 SV=2                                                                 |                                       |              |           |               |                 |                                  |
| Query                                                                                                                                    | Observed                              | Mr (expt)    | Mr (calc) | ppm           | Miss            | Score Expect Rank Unique Peptide |
|                                                                                                                                          | <a href="#">155</a>                   | 372.7219     | 743.4292  | 743.4290      | 0.30            | 0 15 0.034 2 U R.VNIGSVR.R       |
| 74.                                                                                                                                      | <a href="#">1::sp UB2E1_HUMAN </a>    | Mass: 21676  | Score: 15 | Matches: 1(1) | Sequences: 1(1) | emPAI: 0.21                      |
| sp UB2E1_HUMAN                                                                                                                           |                                       |              |           |               |                 |                                  |
| Query                                                                                                                                    | Observed                              | Mr (expt)    | Mr (calc) | ppm           | Miss            | Score Expect Rank Unique Peptide |
|                                                                                                                                          | <a href="#">1202</a>                  | 478.2539     | 954.4932  | 954.4899      | 3.47            | 1 15 0.034 1 U K.LLSTSAKR.I      |
| 75.                                                                                                                                      | <a href="#">3::P75830 MACA_ECOLI</a>  | Mass: 40599  | Score: 15 | Matches: 1(1) | Sequences: 1(1) | emPAI: 0.11                      |
| Macrolide export protein MacA OS=Escherichia coli (strain K12) OX=83333 GN=macA PE=1 SV=2                                                |                                       |              |           |               |                 |                                  |
| Query                                                                                                                                    | Observed                              | Mr (expt)    | Mr (calc) | ppm           | Miss            | Score Expect Rank Unique Peptide |
|                                                                                                                                          | <a href="#">161</a>                   | 373.2138     | 744.4129  | 744.4130      | -0.06           | 0 15 0.035 1 U R.EVTIGAR.N       |
| 76.                                                                                                                                      | <a href="#">3::P17169 GLMS_ECOLI</a>  | Mass: 67081  | Score: 14 | Matches: 1(1) | Sequences: 1(1) | emPAI: 0.07                      |
| Glutamine--fructose-6-phosphate aminotransferase [isomerizing] OS=Escherichia coli (strain K12) OX=83333 GN=gImS PE=1 SV=4               |                                       |              |           |               |                 |                                  |
| Query                                                                                                                                    | Observed                              | Mr (expt)    | Mr (calc) | ppm           | Miss            | Score Expect Rank Unique Peptide |
|                                                                                                                                          | <a href="#">3029</a>                  | 594.2587     | 1186.5028 | 1186.4941     | 7.37            | 0 14 0.042 1 U R.IEQLSQDK.R      |
| 77.                                                                                                                                      | <a href="#">3::POAAH4 SAPD_ECOLI</a>  | Mass: 38093  | Score: 14 | Matches: 1(1) | Sequences: 1(1) | emPAI: 0.12                      |
| Putrescine export system ATP-binding protein SapD OS=Escherichia coli (strain K12) OX=83333 GN=sapD PE=1 SV=1                            |                                       |              |           |               |                 |                                  |
| Query                                                                                                                                    | Observed                              | Mr (expt)    | Mr (calc) | ppm           | Miss            | Score Expect Rank Unique Peptide |
|                                                                                                                                          | <a href="#">653</a>                   | 429.2455     | 856.4765  | 856.4840      | -8.75           | 0 14 0.048 1 U -.MPLLDIR.N       |
| 78.                                                                                                                                      | <a href="#">3::P76015 DHAK_ECOLI</a>  | Mass: 38590  | Score: 14 | Matches: 1(1) | Sequences: 1(1) | emPAI: 0.12                      |
| PEP-dependent dihydroxyacetone kinase, dihydroxyacetone-binding subunit DhaK OS=Escherichia coli (strain K12) OX=83333 GN=dhaK PE=1 SV=2 |                                       |              |           |               |                 |                                  |
| Query                                                                                                                                    | Observed                              | Mr (expt)    | Mr (calc) | ppm           | Miss            | Score Expect Rank Unique Peptide |
|                                                                                                                                          | <a href="#">103</a>                   | 364.7007     | 727.3867  | 727.3864      | 0.42            | 0 14 0.038 1 U R.ADAPVAGK.V      |
| 79.                                                                                                                                      | <a href="#">3::P77766 RNAAM_ECOLI</a> | Mass: 32902  | Score: 14 | Matches: 1(1) | Sequences: 1(1) | emPAI: 0.14                      |
| 5'-3' exoribonuclease OS=Escherichia coli (strain K12) OX=83333 GN=yciV PE=1 SV=1                                                        |                                       |              |           |               |                 |                                  |
| Query                                                                                                                                    | Observed                              | Mr (expt)    | Mr (calc) | ppm           | Miss            | Score Expect Rank Unique Peptide |
|                                                                                                                                          | <a href="#">389</a>                   | 400.7350     | 799.4555  | 799.4552      | 0.40            | 0 14 0.043 2 U R.AQLIAER.L       |
| 80.                                                                                                                                      | <a href="#">3::Q7DFV4 YME_ECOLI</a>   | Mass: 12057  | Score: 14 | Matches: 1(1) | Sequences: 1(1) | emPAI: 0.41                      |
| Putative uncharacterized protein YmdE OS=Escherichia coli (strain K12) OX=83333 GN=yndE PE=5 SV=3                                        |                                       |              |           |               |                 |                                  |
| Query                                                                                                                                    | Observed                              | Mr (expt)    | Mr (calc) | ppm           | Miss            | Score Expect Rank Unique Peptide |
|                                                                                                                                          | <a href="#">2265</a>                  | 547.7330     | 1093.4515 | 1093.4532     | -1.54           | 0 14 0.04 1 U -.MEDGVQAMR.D      |
| 81.                                                                                                                                      | <a href="#">3::P77739 KT3K_ECOLI</a>  | Mass: 32666  | Score: 14 | Matches: 1(1) | Sequences: 1(1) | emPAI: 0.14                      |
| Probable ketoamine kinase YniA OS=Escherichia coli (strain K12) OX=83333 GN=yniA PE=3 SV=1                                               |                                       |              |           |               |                 |                                  |
| Query                                                                                                                                    | Observed                              | Mr (expt)    | Mr (calc) | ppm           | Miss            | Score Expect Rank Unique Peptide |
|                                                                                                                                          | <a href="#">1076</a>                  | 467.2353     | 932.4560  | 932.4538      | 2.39            | 0 14 0.041 1 U -.MWOAISR.L       |
| 82.                                                                                                                                      | <a href="#">3::P16869 FHUE_ECOLI</a>  | Mass: 81239  | Score: 14 | Matches: 1(1) | Sequences: 1(1) | emPAI: 0.05                      |
| FhuE receptor OS=Escherichia coli (strain K12) OX=83333 GN=fhuE PE=1 SV=2                                                                |                                       |              |           |               |                 |                                  |
| Query                                                                                                                                    | Observed                              | Mr (expt)    | Mr (calc) | ppm           | Miss            | Score Expect Rank Unique Peptide |
|                                                                                                                                          | <a href="#">3771</a>                  | 638.2576     | 1274.5006 | 1274.5114     | -8.43           | 0 14 0.043 1 U R.LITLAIIFR.I     |
| 83.                                                                                                                                      | <a href="#">3::POA9M0 LON_ECOLI</a>   | Mass: 87725  | Score: 14 | Matches: 1(1) | Sequences: 1(1) | emPAI: 0.05                      |
| Lon protease OS=Escherichia coli (strain K12) OX=83333 GN=lon PE=1 SV=1                                                                  |                                       |              |           |               |                 |                                  |
| Query                                                                                                                                    | Observed                              | Mr (expt)    | Mr (calc) | ppm           | Miss            | Score Expect Rank Unique Peptide |
|                                                                                                                                          | <a href="#">349</a>                   | 394.7112     | 787.4078  | 787.4075      | 0.28            | 0 14 0.041 2 U K.AEAELOK.L       |
| 84.                                                                                                                                      | <a href="#">3::P09831 GLTB_ECOLI</a>  | Mass: 164335 | Score: 14 | Matches: 1(1) | Sequences: 1(1) | emPAI: 0.03                      |
| Glutamate synthase [NADPH] large chain OS=Escherichia coli (strain K12) OX=83333 GN=gltB PE=1 SV=3                                       |                                       |              |           |               |                 |                                  |
| Query                                                                                                                                    | Observed                              | Mr (expt)    | Mr (calc) | ppm           | Miss            | Score Expect Rank Unique Peptide |
|                                                                                                                                          | <a href="#">1158</a>                  | 473.7351     | 945.4556  | 945.4572      | -1.69           | 1 14 0.044 1 U R.YVITKDK.L       |
| 85.                                                                                                                                      | <a href="#">3::POA7V3 RS3_ECOLI</a>   | Mass: 25967  | Score: 14 | Matches: 1(1) | Sequences: 1(1) | emPAI: 0.18                      |
| 30S ribosomal protein S3 OS=Escherichia coli (strain K12) OX=83333 GN=rpsC PE=1 SV=2                                                     |                                       |              |           |               |                 |                                  |
| Query                                                                                                                                    | Observed                              | Mr (expt)    | Mr (calc) | ppm           | Miss            | Score Expect Rank Unique Peptide |
|                                                                                                                                          | <a href="#">411</a>                   | 403.2065     | 804.3985  | 804.3912      | 9.08            | 0 14 0.043 1 U R.AVONAMR.L       |
| 86.                                                                                                                                      | <a href="#">3::P02918 PBPA_ECOLI</a>  | Mass: 93806  | Score: 14 | Matches: 1(1) | Sequences: 1(1) | emPAI: 0.05                      |
| Penicillin-binding protein 1A OS=Escherichia coli (strain K12) OX=83333 GN=mrca PE=1 SV=1                                                |                                       |              |           |               |                 |                                  |
| Query                                                                                                                                    | Observed                              | Mr (expt)    | Mr (calc) | ppm           | Miss            | Score Expect Rank Unique Peptide |
|                                                                                                                                          | <a href="#">2305</a>                  | 549.8038     | 1097.5930 | 1097.5941     | -1.00           | 0 14 0.043 1 U K.VQAAQQAQR.N     |
| 87.                                                                                                                                      | <a href="#">3::P37013 NORR_ECOLI</a>  | Mass: 55601  | Score: 14 | Matches: 1(1) | Sequences: 1(1) | emPAI: 0.08                      |
| Anaerobic nitric oxide reductase transcription regulator NorR OS=Escherichia coli (strain K12) OX=83333 GN=norR PE=1 SV=2                |                                       |              |           |               |                 |                                  |
| Query                                                                                                                                    | Observed                              | Mr (expt)    | Mr (calc) | ppm           | Miss            | Score Expect Rank Unique Peptide |
|                                                                                                                                          | <a href="#">155</a>                   | 372.7219     | 743.4292  | 743.4290      | 0.32            | 0 14 0.043 3 U R.VLAATNR.D       |
| 88.                                                                                                                                      | <a href="#">3::P71229 HYFR_ECOLI</a>  | Mass: 75771  | Score: 14 | Matches: 1(1) | Sequences: 1(1) | emPAI: 0.06                      |
| DNA-binding transcriptional activator HyfR OS=Escherichia coli (strain K12) OX=83333 GN=hyfr PE=1 SV=1                                   |                                       |              |           |               |                 |                                  |
| Query                                                                                                                                    | Observed                              | Mr (expt)    | Mr (calc) | ppm           | Miss            | Score Expect Rank Unique Peptide |
|                                                                                                                                          | <a href="#">155</a>                   | 372.7219     | 743.4292  | 743.4290      | 0.32            | 0 14 0.043 3 U R.VIAATNR.D       |

89. [3::P38134|ETK\\_ECOLI](#) Mass: 81191 Score: 14 Matches: 1(1) Sequences: 1(1) emPAI: 0.05

Tyrosine-protein kinase etk OS=Escherichia coli (strain K12) OX=83333 GN=etk PE=1 SV=2

| Query                | Observed | Mr(expt)  | Mr(calc)  | ppm  | Miss | Score | Expect | Rank | Unique | Peptide      |
|----------------------|----------|-----------|-----------|------|------|-------|--------|------|--------|--------------|
| <a href="#">2384</a> | 555.2137 | 1108.4128 | 1108.4025 | 9.34 | 0    | 14    | 0.044  | 1    | U      | K.EVSLSMQR.L |

90. [3::P55140|YGC6\\_ECOLI](#) Mass: 32527 Score: 13 Matches: 1(1) Sequences: 1(1) emPAI: 0.14

UPF0603 protein Ygc6 OS=Escherichia coli (strain K12) OX=83333 GN=ygc6 PE=3 SV=2

| Query                 | Observed | Mr(expt)  | Mr(calc)  | ppm   | Miss | Score | Expect | Rank | Unique | Peptide                                                 |
|-----------------------|----------|-----------|-----------|-------|------|-------|--------|------|--------|---------------------------------------------------------|
| <a href="#">12831</a> | 914.3105 | 3653.2130 | 3653.2305 | -4.81 | 2    | 13    | 0.045  | 1    | U      | R.ASGRSYHSDNSGSAGGSDSGGFSGGGGS <del>S</del> GGGGASGRW.- |

91. [3::P00582|DPO1\\_ECOLI](#) Mass: 103168 Score: 13 Matches: 1(1) Sequences: 1(1) emPAI: 0.04

DNA polymerase I OS=Escherichia coli (strain K12) OX=83333 GN=polA PE=1 SV=1

| Query               | Observed | Mr(expt) | Mr(calc) | ppm  | Miss | Score | Expect | Rank | Unique | Peptide      |
|---------------------|----------|----------|----------|------|------|-------|--------|------|--------|--------------|
| <a href="#">718</a> | 435.7561 | 869.4976 | 869.4971 | 0.59 | 1    | 13    | 0.046  | 1    | U      | R.NGVKIDPK.V |

92. [3::P76352|YEE0\\_ECOLI](#) Mass: 60477 Score: 13 Matches: 1(1) Sequences: 1(1) emPAI: 0.07

Probable FMN/FAD exporter Yee0 OS=Escherichia coli (strain K12) OX=83333 GN=yee0 PE=1 SV=4

| Query                 | Observed  | Mr(expt)  | Mr(calc)  | ppm  | Miss | Score | Expect | Rank | Unique | Peptide                                       |
|-----------------------|-----------|-----------|-----------|------|------|-------|--------|------|--------|-----------------------------------------------|
| <a href="#">13155</a> | 1157.1393 | 4624.5282 | 4624.5243 | 0.86 | 0    | 13    | 0.049  | 1    | U      | K.IPLLINGSLNINLNIISGILYGLFVWPLGFGVAGLGLTISR.Y |

93. [3::POAGF6|TDCB\\_ECOLI](#) Mass: 35552 Score: 13 Matches: 1(1) Sequences: 1(1) emPAI: 0.13

L-threonine dehydratase catabolic TdcB OS=Escherichia coli (strain K12) OX=83333 GN=tdcB PE=1 SV=1

| Query                | Observed | Mr(expt)  | Mr(calc)  | ppm  | Miss | Score | Expect | Rank | Unique | Peptide       |
|----------------------|----------|-----------|-----------|------|------|-------|--------|------|--------|---------------|
| <a href="#">2500</a> | 562.2236 | 1122.4327 | 1122.4247 | 7.13 | 0    | 13    | 0.05   | 1    | U      | K.LSSLIDAEK.R |

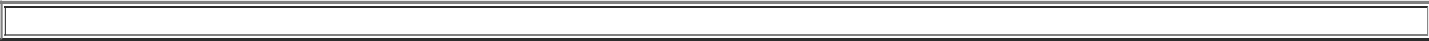

Supplement: 41467_2023_44089_MOESM11_ESM.pdf [file 41467_2023_44089_MOESM11_ESM.pdf]
