# Supplementary material for: ERK2-topoisomerase II regulatory axis is important for gene activation in immediate early genes
Source: Springer Nature journal article supplement (doi:10.1038/s41467-023-44089-y), 2023-12-14

# Mascot Search Results

```

User : r-nakagawa
Email :
Search title : SN221366_deTOP2B_Erk2m_lul_Node:2
MS data file : File Name: Z:\SN221366_deTOP2B_Erk2m_lul_raw\File Path: :File Time: 3/1/2023 6:25:31 PM:File Size: 352168572 [Byte]
Database 1 : cRAP STRAW_proteinG_2023031 (118 sequences: 3090 residues)
Database 2 : Original_21_TOP2B_1-566_20210618 (1 sequences: 599 residues)
Database 3 : Uniprot Proteome E.coli K12 Proteome_E.coli_K12_UP000000625_2022_01 (4448 sequences: 1358110 residues)
Timestamp : 13 Sep 2023 at 00:33:54 GMT
Enzyme : Trypsin
Fixed modifications : Carbamidomethyl (C)
Variable modifications : Acetyl (Protein N-term), Oxidation (M), Phospho (ST), Phospho (Y)
Mass values : Monoisotopic
Protein Mass : Unrestricted
Peptide Mass Tolerance : ± 10 ppm
Fragment Mass Tolerance : ± 0.8 Da
Max Missed Cleavages : 3
Instrument type : Default
Number of queries : 13249
Protein hits : 2::TOP2B_1-566 TOP2B_1-566
1::sp|K2C1|HUMAN| sp|K2C1|HUMAN|
1::sp|K1C10|HUMAN| sp|K1C10|HUMAN|
1::sp|K22E|HUMAN| sp|K22E|HUMAN|
1::sp|TRYP_PIG| sp|TRYP_PIG|
1::sp|K1C9|HUMAN| sp|K1C9|HUMAN|
3::P0AA25|ALBU_BOVIN| Thioesterase 1 OS=Escherichia coli (strain K12) OX=83333 GN=trxA PE=1 SV=2
sp|ALBU_BOVIN| sp|ALBU_BOVIN|
3::P76298|FLHA_ECOLI| Flagellar biosynthesis protein FlhA OS=Escherichia coli (strain K12) OX=83333 GN=flhA PE=3 SV=1
3::Q46857|DKGA_ECOLI| 2,5-diketo-D-gluconic acid reductase A OS=Escherichia coli (strain K12) OX=83333 GN=dkgA PE=1 SV=3
3::P0AD96|LIVJ_ECOLI| Leu/Val-binding protein OS=Escherichia coli (strain K12) OX=83333 GN=livJ PE=1 SV=1
3::P75882|GFCD_ECOLI| Uncharacterized lipoprotein Gfcd OS=Escherichia coli (strain K12) OX=83333 GN=gfcd PE=3 SV=1
3::P0AAB4|UBID_ECOLI| 3-octaprenyl-4-hydroxybenzoate carboxy-lyase OS=Escherichia coli (strain K12) OX=83333 GN=ubid PE=1 SV=1
3::P13009|METH_ECOLI| Methionine synthase OS=Escherichia coli (strain K12) OX=83333 GN=meth PE=1 SV=5
3::P67601|TREF_ECOLI| Cytoplasmic trehalase OS=Escherichia coli (strain K12) OX=83333 GN=tref PE=1 SV=1
3::P0ACP5|GNTR_ECOLI| HTH-type transcriptional regulator GntR OS=Escherichia coli (strain K12) OX=83333 GN=gntR PE=1 SV=1
sp|RS27A_HUMAN| sp|RS27A_HUMAN|
1::sp|P29362|YAHG_ECOLI| Biotin synthase OS=Escherichia coli (strain K12) OX=83333 GN=yahg PE=1 SV=2
3::P77221|YAHG_ECOLI| Uncharacterized protein YahG OS=Escherichia coli (strain K12) OX=83333 GN=yahg PE=4 SV=1
3::P67660|YHAJ_ECOLI| Probable HTH-type transcriptional regulator YhaJ OS=Escherichia coli (strain K12) OX=83333 GN=yhaJ PE=3 SV=1
3::P39358|YJHG_ECOLI| D-xylonate dehydratase Yjhg OS=Escherichia coli (strain K12) OX=83333 GN=yjhg PE=1 SV=2
3::P24177|ACRD_ECOLI| Probable aminoglycoside efflux pump OS=Escherichia coli (strain K12) OX=83333 GN=acrD PE=3 SV=3
3::P38095|RTOR_ECOLI| Transcriptional regulatory protein RtcR OS=Escherichia coli (strain K12) OX=83333 GN=rtcR PE=4 SV=2
3::P71242|WCAK_ECOLI| Colanic acid biosynthesis protein WcaK OS=Escherichia coli (strain K12) OX=83333 GN=wcaK PE=3 SV=2
3::P77682|GTRA_ECOLI| Prophage bacteriophage-linked glucose translocase homolog OS=Escherichia coli (strain K12) OX=83333 GN=yfdG PE=1 SV=1
3::P0AF59|MEPM_ECOLI| Murein DD-endopeptidase MepM OS=Escherichia coli (strain K12) OX=83333 GN=mepM PE=1 SV=1
3::Q46861|YGI0_ECOLI| UFP0313 protein Ygi0 OS=Escherichia coli (strain K12) OX=83333 GN=ygi0 PE=3 SV=3
3::P25772|TUBO_ECOLI| DNA long-term factor Tu1 OS=Escherichia coli (strain K12) OX=83333 GN=tuA PE=1 SV=1
3::P0ABD5|ACCA_ECOLI| Acetyl-coenzyme A carboxylase carboxyl transferase subunit alpha OS=Escherichia coli (strain K12) OX=83333 GN=accA PE=1 SV=2
3::Q46793|YGEN_ECOLI| Putative uncharacterized protein Ygen OS=Escherichia coli (strain K12) OX=83333 GN=ygen PE=5 SV=3
3::P38134|ETK_ECOLI| Tyrosine-protein kinase etk OS=Escherichia coli (strain K12) OX=83333 GN=etk PE=1 SV=2
3::P37371|YFDC_ECOLI| Inner membrane protein Yfdc OS=Escherichia coli (strain K12) OX=83333 GN=yfdc PE=1 SV=1
3::P9VH0Y|YPAO_ECOLI| Uncharacterized protein YpaA OS=Escherichia coli (strain K12) OX=83333 GN=ypaA PE=4 SV=1
3::P16384|MIAA_ECOLI| tRNA dimethylallyltransferase OS=Escherichia coli (strain K12) OX=83333 GN=miaA PE=1 SV=2
3::P63224|GMHA_ECOLI| Phosphopentose isomerase OS=Escherichia coli (strain K12) OX=83333 GN=gmhA PE=1 SV=1
3::P0A823|YBGC_ECOLI| Acyl-CoA thioester hydrolase YbgC OS=Escherichia coli (strain K12) OX=83333 GN=ybgC PE=1 SV=1
sp|KRHB4_HUMAN| sp|KRHB4_HUMAN|
1::sp|KRHB4_HUMAN| DNA ligase B OS=Escherichia coli (strain K12) OX=83333 GN=ligB PE=1 SV=2
3::P0A759|NAGB_ECOLI| Glucosamine-6-phosphate deaminase OS=Escherichia coli (strain K12) OX=83333 GN=nagB PE=1 SV=1
3::P0AD18|YGIW_ECOLI| Uncharacterized protein YgiW OS=Escherichia coli (strain K12) OX=83333 GN=ygiW PE=3 SV=1
3::P0AGD7|SRP54_ECOLI| Signal recognition particle protein OS=Escherichia coli (strain K12) OX=83333 GN=ffh PE=1 SV=1
sp|KRHB4_HUMAN| sp|KRHB4_HUMAN|
3::P77211|CUSC_ECOLI| Cation efflux system protein CusC OS=Escherichia coli (strain K12) OX=83333 GN=cusC PE=1 SV=1
3::P69811|PTFAH_ECOLI| Multiphosphoryl transfer protein OS=Escherichia coli (strain K12) OX=83333 GN=frub PE=1 SV=1
3::P0AE15|DFGB_ECOLI| D-galactose-binding periplasmic protein OS=Escherichia coli (strain K12) OX=83333 GN=mgIB PE=1 SV=1
3::P15028|YFCC_ECOLI| Fe(3+) dicitrate-binding periplasmic protein OS=Escherichia coli (strain K12) OX=83333 GN=fecB PE=2 SV=3
3::Q08065|ATOC_ECOLI| Regulatory protein Atoc OS=Escherichia coli (strain K12) OX=83333 GN=atoc PE=1 SV=2
3::P00634|RFB ECOLI| Alkaline phosphatase OS=Escherichia coli (strain K12) OX=83333 GN=rphA PE=1 SV=1
3::P06932|RSMA_ECOLI| Ribosome RNA small subunit methyltransferase A OS=Escherichia coli (strain K12) OX=83333 GN=rsmA PE=1 SV=1
3::P71377|WZXC_ECOLI| Lipopolysaccharide biosynthesis protein WzxC OS=Escherichia coli (strain K12) OX=83333 GN=wzxC PE=1 SV=1
3::P33668|YBBC_ECOLI| Uncharacterized protein YbcC OS=Escherichia coli (strain K12) OX=83333 GN=ybcC PE=2 SV=1
3::P80645|SSUD_ECOLI| Alkanesulfonate monooxygenase OS=Escherichia coli (strain K12) OX=83333 GN=ssuD PE=1 SV=3
3::P13738|NHAO_ECOLI| Na(+)/H(+) antiporter NhaA OS=Escherichia coli (strain K12) OX=83333 GN=nhaA PE=1 SV=3
3::P31434|XYLS_ECOLI| Alpha-xylidase OS=Escherichia coli (strain K12) OX=83333 GN=yicI PE=1 SV=2
3::P21893|RECJ_ECOLI| 23S rRNA 5-hydroxytyridine C2501 synthase YecJ OS=Escherichia coli (strain K12) OX=83333 GN=rliHA PE=1 SV=2
Single-stranded-DNA-specific exonuclease RecJ OS=Escherichia coli (strain K12) OX=83333 GN=recJ PE=1 SV=2
3::P76016|DHAR_ECOLI| PTS-dependent dihydroxyacetone kinase operon regulatory protein OS=Escherichia coli (strain K12) OX=83333 GN=dhar PE=1 SV=2
3::P0AF48|NUOM_ECOLI| NADH-quinone oxidoreductase subunit M OS=Escherichia coli (strain K12) OX=83333 GN=nuoM PE=1 SV=1
3::P08172|GRPE_ECOLI| NADH-quinone oxidoreductase subunit N OS=Escherichia coli (strain K12) OX=83333 GN=grpe PE=1 SV=1
3::P28917|YDCC_ECOLI| H repeat-associated putative transposase YdcC OS=Escherichia coli (strain K12) OX=83333 GN=ydcC PE=3 SV=1
3::P37007|YAGA_ECOLI| Uncharacterized protein YagA OS=Escherichia coli (strain K12) OX=83333 GN=yagA PE=2 SV=3
3::P28912|YHHI_ECOLI| H repeat-associated putative transposase YhhI OS=Escherichia coli (strain K12) OX=83333 GN=yhhI PE=3 SV=1
3::P28630|HOLA_ECOLI| DNA polymerase III subunit delta OS=Escherichia coli (strain K12) OX=83333 GN=hoIA PE=1 SV=1
3::P0AAK7|NRFEC_ECOLI| Protein NrfC OS=Escherichia coli (strain K12) OX=83333 GN=nrfC PE=3 SV=1
3::P37650|RCSC_ECOLI| Cellulose synthase operon protein C OS=Escherichia coli (strain K12) OX=83333 GN=bcsC PE=1 SV=3
3::P0AFB8|NTRC_ECOLI| DNA-binding transcriptional regulator NtrC OS=Escherichia coli (strain K12) OX=83333 GN=glnG PE=1 SV=1
3::P0AG96|SECE_ECOLI| Protein translocase subunit SecE OS=Escherichia coli (strain K12) OX=83333 GN=secE PE=1 SV=1
3::P02925|RBSB_ECOLI| Ribose import binding protein RbsB OS=Escherichia coli (strain K12) OX=83333 GN=rbsB PE=1 SV=1
3::P0A664|DSBA_ECOLI| Thiol disulfide interchange protein DsbA OS=Escherichia coli (strain K12) OX=83333 GN=dsbA PE=1 SV=1
3::P77766|RNAAM_ECOLI| 5'-3' exoribonuclease OS=Escherichia coli (strain K12) OX=83333 GN=yciV PE=1 SV=1
3::P39374|INTB_ECOLI| Putative protein IntB OS=Escherichia coli (strain K12) OX=83333 GN=intB PE=5 SV=1
3::P00957|SYA_ECOLI| Alanine--tRNA ligase OS=Escherichia coli (strain K12) OX=83333 GN=alaS PE=1 SV=2
3::P18869|FHUE_ECOLI| FhuE receptor OS=Escherichia coli (strain K12) OX=83333 GN=fhuE PE=1 SV=2
3::P77658|YNAO_ECOLI| Protein YnaA OS=Escherichia coli (strain K12) OX=83333 GN=ynaA PE=4 SV=1
3::P50456|MLCC_ECOLI| Protein mlc OS=Escherichia coli (strain K12) OX=83333 GN=mlc PE=1 SV=2
3::P07943|LAMB_ECOLI| Maltoporin OS=Escherichia coli (strain K12) OX=83333 GN=lamb PE=1 SV=1
3::P0AD6|EDD_ECOLI| Phosphogluconate dehydratase OS=Escherichia coli (strain K12) OX=83333 GN=edd PE=1 SV=1
3::P37902|GLTI_ECOLI| Glutamate/aspartate import solute-binding protein OS=Escherichia coli (strain K12) OX=83333 GN=gltI PE=1 SV=2
3::P28659|METQ_ECOLI| D-methionine-binding lipoprotein MetQ OS=Escherichia coli (strain K12) OX=83333 GN=metQ PE=1 SV=2
3::P23847|PDEA_ECOLI| Probable cyclic di-GMP phosphodiesterase PdeA OS=Escherichia coli (strain K12) OX=83333 GN=pdeA PE=2 SV=2
3::P56258|WECF_ECOLI| TDP-N-acetylucosamine:lipid II N-acetylucosaminyltransferase OS=Escherichia coli (strain K12) OX=83333 GN=wecF PE=1 SV=2
3::P31224|ACRB_ECOLI| Multidrug efflux pump subunit AcrB OS=Escherichia coli (strain K12) OX=83333 GN=acrB PE=1 SV=1

```

## Target Decoy False discovery rate

Peptide matches above identity threshold 487 57 11.70 %  
 Peptide matches above homology or identity threshold 488 60 12.30 %

## Select Summary Report

Significance threshold p < 
 Max. number of hits 
 Show Percolator scores

Standard scoring  MudPit scoring  Display non-significant matches  Show sub-sets

Show pop-ups  Suppress pop-ups  Require bold red

Preferred taxonomy

All queries
  Unassigned
  Below homology threshold
  Below identity threshold

1. [2::TOP2B\\_1-566](#) Mass: 66629 Score: 7213 Matches: 298 (298) Sequences: 44 (44) emPA1: 30.81

| Query               | Observed | Mr (expt) | Mr (calc) | ppm   | Miss | Score | Expect  | Rank | Unique | Peptide                                                                                 |
|---------------------|----------|-----------|-----------|-------|------|-------|---------|------|--------|-----------------------------------------------------------------------------------------|
| <a href="#">377</a> | 401.7245 | 801.4344  | 801.4344  | -0.07 | 0    | 32    | 0.00087 | 1    | U      | <a href="#">K.AQTQLNK.K</a> <a href="#">376</a>                                         |
| <a href="#">447</a> | 410.7502 | 819.4858  | 819.4854  | 0.51  | 0    | 38    | 0.00018 | 1    | U      | <a href="#">K.IVGLQYK.K</a> <a href="#">441</a> <a href="#">445</a> <a href="#">446</a> |
| <a href="#">482</a> | 414.7811 | 827.5477  | 827.5480  | -0.40 | 1    | 32    | 0.00059 | 1    | U      | <a href="#">K.LIEVVKK.K</a>                                                             |
| <a href="#">596</a> | 426.2430 | 850.4714  | 850.4701  | 1.51  | 0    | 28    | 0.0014  | 1    | U      | <a href="#">R.YGVFPLR.G</a> <a href="#">592</a> <a href="#">594</a> <a href="#">595</a> |
| <a href="#">730</a> | 439.7585 | 877.5024  | 877.5022  | 0.32  | 0    | 23    | 0.0057  | 1    | U      | <a href="#">K.GIPVVEHK.V</a> <a href="#">729</a>                                        |





|                                                                                                          |                                      |              |               |                 |                                                                                              |                                                                                                                                                                                                                                              |
|----------------------------------------------------------------------------------------------------------|--------------------------------------|--------------|---------------|-----------------|----------------------------------------------------------------------------------------------|----------------------------------------------------------------------------------------------------------------------------------------------------------------------------------------------------------------------------------------------|
| 6.                                                                                                       | <a href="#">1::sp K1C9_HUMAN </a>    | Mass: 62320  | Score: 174    | Matches: 6(6)   | Sequences: 6(6)                                                                              | emPAI: 0.51                                                                                                                                                                                                                                  |
| sp K1C9_HUMAN                                                                                            |                                      |              |               |                 |                                                                                              |                                                                                                                                                                                                                                              |
| Query                                                                                                    | Observed                             | Mr(expt)     | Mr(calc)      | ppm             | Miss Score                                                                                   | Expect Rank Unique Peptide                                                                                                                                                                                                                   |
| <a href="#">405</a>                                                                                      | 405.2239                             | 808.4332     | 808.4330      | 0.15            | 0 20                                                                                         | 0.0095 1 R.LASYLDK.V                                                                                                                                                                                                                         |
| <a href="#">1870</a>                                                                                     | 530.7864                             | 1059.5583    | 1059.5560     | 2.13            | 0 19                                                                                         | 0.02 1 U K.TLLDIDNTR.M                                                                                                                                                                                                                       |
| <a href="#">1903</a>                                                                                     | 533.2532                             | 1064.4919    | 1064.4920     | -0.10           | 0 44                                                                                         | 4.9e-005 1 U K.STMQELNSR.L                                                                                                                                                                                                                   |
| <a href="#">6188</a>                                                                                     | 793.8866                             | 1585.7586    | 1585.7583     | 0.15            | 0 74                                                                                         | 1.2e-007 1 U K.VOALEEANNDLENK.I                                                                                                                                                                                                              |
| <a href="#">7637</a>                                                                                     | 896.3673                             | 1790.7200    | 1790.7205     | -0.29           | 0 64                                                                                         | 8e-007 1 U R.GSGGGYGGGGGGGGYGGGSGR.G                                                                                                                                                                                                         |
| <a href="#">12070</a>                                                                                    | 1088.8423                            | 3263.5050    | 3263.5066     | -0.48           | 0 31                                                                                         | 0.0065 1 U K.DIENQYETQITQIEHVSSSGQEVQSSAK.E                                                                                                                                                                                                  |
| 7.                                                                                                       | <a href="#">3::POA25 THIO_ECOLI</a>  | Mass: 11913  | Score: 137    | Matches: 2(2)   | Sequences: 2(2)                                                                              | emPAI: 1.01                                                                                                                                                                                                                                  |
| Thioredoxin 1 OS=Escherichia coli (strain K12) OX=83333 GN=trxA PE=1 SV=2                                |                                      |              |               |                 |                                                                                              |                                                                                                                                                                                                                                              |
| Query                                                                                                    | Observed                             | Mr(expt)     | Mr(calc)      | ppm             | Miss Score                                                                                   | Expect Rank Unique Peptide                                                                                                                                                                                                                   |
| <a href="#">3557</a>                                                                                     | 634.3358                             | 1266.6571    | 1266.6568     | 0.21            | 0 69                                                                                         | 2.9e-007 1 U K.LNIDONPGTAPK.Y                                                                                                                                                                                                                |
| <a href="#">7808</a>                                                                                     | 903.4531                             | 1804.8916    | 1804.8917     | -0.04           | 0 85                                                                                         | 1.1e-008 1 U K.MIAPILDEIAEYQGK.L                                                                                                                                                                                                             |
| 8.                                                                                                       | <a href="#">1::sp ALBU_BOVIN </a>    | Mass: 71244  | Score: 123    | Matches: 5(5)   | Sequences: 4(4)                                                                              | emPAI: 0.27                                                                                                                                                                                                                                  |
| sp ALBU_BOVIN                                                                                            |                                      |              |               |                 |                                                                                              |                                                                                                                                                                                                                                              |
| Query                                                                                                    | Observed                             | Mr(expt)     | Mr(calc)      | ppm             | Miss Score                                                                                   | Expect Rank Unique Peptide                                                                                                                                                                                                                   |
| <a href="#">952</a>                                                                                      | 461.7476                             | 921.4807     | 921.4807      | -0.06           | 0 36                                                                                         | 0.00036 1 U K.AEFVEYTK.L                                                                                                                                                                                                                     |
| <a href="#">2758</a>                                                                                     | 582.3191                             | 1162.6237    | 1162.6234     | 0.31            | 0 30                                                                                         | 0.0014 1 U K.LVNELTEFAK.T                                                                                                                                                                                                                    |
| <a href="#">3867</a>                                                                                     | 653.3625                             | 1304.7105    | 1304.7088     | 1.25            | 0 43                                                                                         | 7.9e-005 1 U K.HLVDEPQNLIK.Q <a href="#">3866</a>                                                                                                                                                                                            |
| <a href="#">6495</a>                                                                                     | 547.3181                             | 1638.9324    | 1638.9305     | 1.20            | 1 35                                                                                         | 0.00029 1 U R.KVPQVSTPTLVESR.S                                                                                                                                                                                                               |
| 9.                                                                                                       | <a href="#">3::P76298 FLHA_ECOLI</a> | Mass: 74795  | Score: 92     | Matches: 14(14) | Sequences: 1(1)                                                                              | emPAI: 0.06                                                                                                                                                                                                                                  |
| Flagellar biosynthesis protein FlhA OS=Escherichia coli (strain K12) OX=83333 GN=flhA PE=3 SV=1          |                                      |              |               |                 |                                                                                              |                                                                                                                                                                                                                                              |
| Query                                                                                                    | Observed                             | Mr(expt)     | Mr(calc)      | ppm             | Miss Score                                                                                   | Expect Rank Unique Peptide                                                                                                                                                                                                                   |
| <a href="#">3513</a>                                                                                     | 632.8193                             | 1263.6241    | 1263.6159     | 6.55            | 1 (19)                                                                                       | 0.021 1 U R.HIRMATIGGK. - <a href="#">3530</a> <a href="#">3538</a>                                                                                                                                                                          |
| <a href="#">3525</a>                                                                                     | 632.8197                             | 1263.6249    | 1263.6159     | 7.12            | 1 26                                                                                         | 0.0047 1 U R.HIRMTAIGGK. - <a href="#">3514</a> <a href="#">3515</a> <a href="#">3516</a> <a href="#">3519</a> <a href="#">3524</a> <a href="#">3527</a> <a href="#">3528</a> <a href="#">3534</a> <a href="#">3536</a> <a href="#">3540</a> |
| 10.                                                                                                      | <a href="#">3::Q46857 DKGA_ECOLI</a> | Mass: 31147  | Score: 34     | Matches: 2(2)   | Sequences: 1(1)                                                                              | emPAI: 0.15                                                                                                                                                                                                                                  |
| 2,5-diketo-D-gluconic acid reductase A OS=Escherichia coli (strain K12) OX=83333 GN=dkgA PE=1 SV=3       |                                      |              |               |                 |                                                                                              |                                                                                                                                                                                                                                              |
| Query                                                                                                    | Observed                             | Mr(expt)     | Mr(calc)      | ppm             | Miss Score                                                                                   | Expect Rank Unique Peptide                                                                                                                                                                                                                   |
| <a href="#">1011</a>                                                                                     | 466.2456                             | 930.4766     | 930.4844      | -8.41           | 0 25                                                                                         | 0.0034 1 U -_MANPTVIK.L <a href="#">1012</a>                                                                                                                                                                                                 |
| 11.                                                                                                      | <a href="#">3::POAD96 LIVJ_ECOLI</a> | Mass: 39223  | Score: 31     | Matches: 1(1)   | Sequences: 1(1)                                                                              | emPAI: 0.11                                                                                                                                                                                                                                  |
| Leu/Ile/Val-binding protein OS=Escherichia coli (strain K12) OX=83333 GN=livJ PE=1 SV=1                  |                                      |              |               |                 |                                                                                              |                                                                                                                                                                                                                                              |
| Query                                                                                                    | Observed                             | Mr(expt)     | Mr(calc)      | ppm             | Miss Score                                                                                   | Expect Rank Unique Peptide                                                                                                                                                                                                                   |
| <a href="#">369</a>                                                                                      | 400.7352                             | 799.4558     | 799.4552      | 0.75            | 0 31                                                                                         | 0.00082 1 U K.QAVAVANK.V                                                                                                                                                                                                                     |
| Proteins matching the same set of peptides:                                                              |                                      |              |               |                 |                                                                                              |                                                                                                                                                                                                                                              |
| <a href="#">3::P04816 LIVK_ECOLI</a>                                                                     | Mass: 39468                          | Score: 31    | Matches: 1(1) | Sequences: 1(1) | Leucine-specific-binding protein OS=Escherichia coli (strain K12) OX=83333 GN=livK PE=1 SV=2 |                                                                                                                                                                                                                                              |
| 12.                                                                                                      | <a href="#">3::P75882 GFCO_ECOLI</a> | Mass: 78923  | Score: 31     | Matches: 3(3)   | Sequences: 1(1)                                                                              | emPAI: 0.06                                                                                                                                                                                                                                  |
| Uncharacterized lipoprotein GfcD OS=Escherichia coli (strain K12) OX=83333 GN=gfcD PE=3 SV=1             |                                      |              |               |                 |                                                                                              |                                                                                                                                                                                                                                              |
| Query                                                                                                    | Observed                             | Mr(expt)     | Mr(calc)      | ppm             | Miss Score                                                                                   | Expect Rank Unique Peptide                                                                                                                                                                                                                   |
| <a href="#">1552</a>                                                                                     | 509.2826                             | 1016.5506    | 1016.5502     | 0.40            | 1 22                                                                                         | 0.0089 1 U K.DKGATIDYAK.R <a href="#">1548</a> <a href="#">1550</a>                                                                                                                                                                          |
| 13.                                                                                                      | <a href="#">3::POAAB4 UBID_ECOLI</a> | Mass: 55967  | Score: 28     | Matches: 1(1)   | Sequences: 1(1)                                                                              | emPAI: 0.08                                                                                                                                                                                                                                  |
| 3-octaprenyl-4-hydroxybenzoate carboxy-lyase OS=Escherichia coli (strain K12) OX=83333 GN=ubiD PE=1 SV=1 |                                      |              |               |                 |                                                                                              |                                                                                                                                                                                                                                              |
| Query                                                                                                    | Observed                             | Mr(expt)     | Mr(calc)      | ppm             | Miss Score                                                                                   | Expect Rank Unique Peptide                                                                                                                                                                                                                   |
| <a href="#">12975</a>                                                                                    | 1078.2271                            | 4308.8795    | 4308.8650     | 3.37            | 2 28                                                                                         | 0.011 1 U R.MDPARDIVLVENTPIDYLDFAFPVSLGSKMGLDAINK.W                                                                                                                                                                                          |
| 14.                                                                                                      | <a href="#">3::P13009 METH_ECOLI</a> | Mass: 136653 | Score: 28     | Matches: 2(2)   | Sequences: 2(2)                                                                              | emPAI: 0.06                                                                                                                                                                                                                                  |
| Methionine synthase OS=Escherichia coli (strain K12) OX=83333 GN=metH PE=1 SV=5                          |                                      |              |               |                 |                                                                                              |                                                                                                                                                                                                                                              |
| Query                                                                                                    | Observed                             | Mr(expt)     | Mr(calc)      | ppm             | Miss Score                                                                                   | Expect Rank Unique Peptide                                                                                                                                                                                                                   |
| <a href="#">414</a>                                                                                      | 406.7352                             | 811.4559     | 811.4552      | 0.84            | 0 22                                                                                         | 0.0061 1 U R.AVEGLAPR.K                                                                                                                                                                                                                      |
| <a href="#">3663</a>                                                                                     | 427.1728                             | 1278.4965    | 1278.5080     | -8.99           | 1 19                                                                                         | 0.017 1 U -_MSSKVEQLR.A                                                                                                                                                                                                                      |
| 15.                                                                                                      | <a href="#">3::P62601 TREF_ECOLI</a> | Mass: 63828  | Score: 27     | Matches: 1(1)   | Sequences: 1(1)                                                                              | emPAI: 0.07                                                                                                                                                                                                                                  |
| Cytoplasmic trehalase OS=Escherichia coli (strain K12) OX=83333 GN=treF PE=1 SV=1                        |                                      |              |               |                 |                                                                                              |                                                                                                                                                                                                                                              |
| Query                                                                                                    | Observed                             | Mr(expt)     | Mr(calc)      | ppm             | Miss Score                                                                                   | Expect Rank Unique Peptide                                                                                                                                                                                                                   |
| <a href="#">6426</a>                                                                                     | 812.4229                             | 1622.8312    | 1622.8280     | 1.98            | 1 27                                                                                         | 0.0044 1 U K.LESAIANISALKGK.E                                                                                                                                                                                                                |
| 16.                                                                                                      | <a href="#">3::POACP5 GNTR_ECOLI</a> | Mass: 36570  | Score: 26     | Matches: 1(1)   | Sequences: 1(1)                                                                              | emPAI: 0.12                                                                                                                                                                                                                                  |
| HTH-type transcriptional regulator GntR OS=Escherichia coli (strain K12) OX=83333 GN=gntR PE=1 SV=1      |                                      |              |               |                 |                                                                                              |                                                                                                                                                                                                                                              |
| Query                                                                                                    | Observed                             | Mr(expt)     | Mr(calc)      | ppm             | Miss Score                                                                                   | Expect Rank Unique Peptide                                                                                                                                                                                                                   |
| <a href="#">612</a>                                                                                      | 428.7661                             | 855.5176     | 855.5178      | -0.24           | 0 26                                                                                         | 0.0025 1 U R.LASVLTPE.E                                                                                                                                                                                                                      |
| 17.                                                                                                      | <a href="#">1::sp RS27A_HUMAN </a>   | Mass: 18296  | Score: 25     | Matches: 1(1)   | Sequences: 1(1)                                                                              | emPAI: 0.26                                                                                                                                                                                                                                  |
| sp RS27A_HUMAN                                                                                           |                                      |              |               |                 |                                                                                              |                                                                                                                                                                                                                                              |
| Query                                                                                                    | Observed                             | Mr(expt)     | Mr(calc)      | ppm             | Miss Score                                                                                   | Expect Rank Unique Peptide                                                                                                                                                                                                                   |
| <a href="#">7607</a>                                                                                     | 894.4668                             | 1786.9191    | 1786.9200     | -0.51           | 0 25                                                                                         | 0.0093 1 U K.TITLEVEPSDTIENVK.A                                                                                                                                                                                                              |
| 18.                                                                                                      | <a href="#">3::P12996 BIOB_ECOLI</a> | Mass: 39079  | Score: 25     | Matches: 1(1)   | Sequences: 1(1)                                                                              | emPAI: 0.11                                                                                                                                                                                                                                  |
| Biotin synthase OS=Escherichia coli (strain K12) OX=83333 GN=bioB PE=1 SV=2                              |                                      |              |               |                 |                                                                                              |                                                                                                                                                                                                                                              |
| Query                                                                                                    | Observed                             | Mr(expt)     | Mr(calc)      | ppm             | Miss Score                                                                                   | Expect Rank Unique Peptide                                                                                                                                                                                                                   |
| <a href="#">217</a>                                                                                      | 379.7296                             | 757.4446     | 757.4446      | 0.03            | 1 25                                                                                         | 0.0041 1 U K.VRDAGIK.V                                                                                                                                                                                                                       |
| 19.                                                                                                      | <a href="#">3::P77221 YAHG_ECOLI</a> | Mass: 50740  | Score: 24     | Matches: 1(1)   | Sequences: 1(1)                                                                              | emPAI: 0.09                                                                                                                                                                                                                                  |
| Uncharacterized protein YahG OS=Escherichia coli (strain K12) OX=83333 GN=yahG PE=4 SV=1                 |                                      |              |               |                 |                                                                                              |                                                                                                                                                                                                                                              |
| Query                                                                                                    | Observed                             | Mr(expt)     | Mr(calc)      | ppm             | Miss Score                                                                                   | Expect Rank Unique Peptide                                                                                                                                                                                                                   |

20. [3::P67660|YHAJ\\_ECOLI](#) Mass: 33293 Score: 24 Matches: 1(1) Sequences: 1(1) emPAI: 0.14  
Probable HTH-type transcriptional regulator YhaJ OS=Escherichia coli (strain K12) OX=83333 GN=yhaJ PE=3 SV=1  
Query Observed Mr(expt) Mr(calc) ppm Miss Score Expect Rank Unique Peptide  
[11542](#) 767.8403 3067.3323 3067.3025 9.73 2 24 0.025 1 U R.LEQGRADIVIAPDMHFRSSSEINSR.K
21. [3::P39358|YJHG\\_ECOLI](#) Mass: 70486 Score: 23 Matches: 1(1) Sequences: 1(1) emPAI: 0.06  
D-xylonate dehydratase YjhG OS=Escherichia coli (strain K12) OX=83333 GN=yjhG PE=1 SV=2  
Query Observed Mr(expt) Mr(calc) ppm Miss Score Expect Rank Unique Peptide  
[150](#) 372.7220 743.4294 743.4290 0.57 0 23 0.0051 1 U K.VQTIGAR.F
- Proteins matching the same set of peptides:  
[3::P77596|YAGF\\_ECOLI](#) Mass: 69926 Score: 23 Matches: 1(1) Sequences: 1(1)  
D-xylonate dehydratase YagF OS=Escherichia coli (strain K12) OX=83333 GN=yagF PE=1 SV=1
22. [3::P24177|ACRD\\_ECOLI](#) Mass: 113203 Score: 22 Matches: 1(1) Sequences: 1(1) emPAI: 0.04  
Probable aminoglycoside efflux pump OS=Escherichia coli (strain K12) OX=83333 GN=acrD PE=3 SV=3  
Query Observed Mr(expt) Mr(calc) ppm Miss Score Expect Rank Unique Peptide  
[13075](#) 1105.2711 4417.0552 4417.0516 0.80 2 22 0.05 1 U R.EAIRKSMGQIQGALVGIAMVLSAVFVPMAFFGGITGIAYR.Q
23. [3::P38035|RTCRC\\_ECOLI](#) Mass: 60604 Score: 22 Matches: 1(1) Sequences: 1(1) emPAI: 0.07  
Transcriptional regulatory protein RtcR OS=Escherichia coli (strain K12) OX=83333 GN=rtcR PE=4 SV=2  
Query Observed Mr(expt) Mr(calc) ppm Miss Score Expect Rank Unique Peptide  
[2732](#) 580.7935 1159.5725 1159.5638 7.46 1 22 0.0075 1 U R.SRSLFEILK.R
24. [3::P71242|WCAK\\_ECOLI](#) Mass: 47598 Score: 22 Matches: 1(1) Sequences: 1(1) emPAI: 0.09  
Colanic acid biosynthesis protein WcaK OS=Escherichia coli (strain K12) OX=83333 GN=wcaK PE=3 SV=2  
Query Observed Mr(expt) Mr(calc) ppm Miss Score Expect Rank Unique Peptide  
[781](#) 445.7564 889.4982 889.4981 0.16 1 22 0.012 1 U K.RSNITAK.V
25. [3::P77682|GTRA\\_ECOLI](#) Mass: 13388 Score: 21 Matches: 1(1) Sequences: 1(1) emPAI: 0.36  
Prophage bacteriophage-linked glucose translocase homolog OS=Escherichia coli (strain K12) OX=83333 GN=yfdG PE=1 SV=1  
Query Observed Mr(expt) Mr(calc) ppm Miss Score Expect Rank Unique Peptide  
[4860](#) 484.1993 1449.5762 1449.5765 -0.17 1 21 0.012 1 U K.FIFKASTTMR.Y
26. [3::P0AFS9|MEPM\\_ECOLI](#) Mass: 49027 Score: 20 Matches: 1(1) Sequences: 1(1) emPAI: 0.09  
Murein DD-endopeptidase MepM OS=Escherichia coli (strain K12) OX=83333 GN=mepM PE=1 SV=1  
Query Observed Mr(expt) Mr(calc) ppm Miss Score Expect Rank Unique Peptide  
[8174](#) 620.6276 1858.8610 1858.8703 -5.02 2 20 0.037 1 U R.EQSQLLVRLRSEGK.D
27. [3::Q46861|YGIQ\\_ECOLI](#) Mass: 84223 Score: 20 Matches: 1(1) Sequences: 1(1) emPAI: 0.05  
UPF0313 protein YgiQ OS=Escherichia coli (strain K12) OX=83333 GN=ygiQ PE=3 SV=3  
Query Observed Mr(expt) Mr(calc) ppm Miss Score Expect Rank Unique Peptide  
[6156](#) 528.5885 1582.7436 1582.7449 -0.83 1 20 0.029 1 U K.TYVLLPSFEKVK.G
28. [3::P0CE47|EFTU1\\_ECOLI](#) Mass: 43427 Score: 19 Matches: 1(1) Sequences: 1(1) emPAI: 0.10  
Elongation factor Tu 1 OS=Escherichia coli (strain K12) OX=83333 GN=tufA PE=1 SV=1  
Query Observed Mr(expt) Mr(calc) ppm Miss Score Expect Rank Unique Peptide  
[2658](#) 577.2888 1152.5631 1152.5652 -1.84 1 19 0.031 1 U R.GIVVTGRVER.G
- Proteins matching the same set of peptides:  
[3::P0CE48|EFTU2\\_ECOLI](#) Mass: 43457 Score: 19 Matches: 1(1) Sequences: 1(1)  
Elongation factor Tu 2 OS=Escherichia coli (strain K12) OX=83333 GN=tufB PE=1 SV=1
29. [3::P0ARD5|ACCA\\_ECOLI](#) Mass: 35333 Score: 19 Matches: 1(1) Sequences: 1(1) emPAI: 0.13  
Acetyl-coenzyme A carboxylase carboxyl transferase subunit alpha OS=Escherichia coli (strain K12) OX=83333 GN=accA PE=1 SV=2  
Query Observed Mr(expt) Mr(calc) ppm Miss Score Expect Rank Unique Peptide  
[11987](#) 807.7025 3226.7809 3226.7747 1.92 3 19 0.02 1 U R.LKELKIDSIIPEPLGGAHNPEAMAASLK.A
30. [3::Q46793|YGEN\\_ECOLI](#) Mass: 27575 Score: 19 Matches: 1(1) Sequences: 1(1) emPAI: 0.17  
Putative uncharacterized protein YgeN OS=Escherichia coli (strain K12) OX=83333 GN=ygeN PE=5 SV=3  
Query Observed Mr(expt) Mr(calc) ppm Miss Score Expect Rank Unique Peptide  
[5685](#) 765.8949 1529.7752 1529.7710 2.76 3 19 0.034 1 U -\_MRKKIEMSLIK.S
31. [3::P38134|ETK\\_ECOLI](#) Mass: 81191 Score: 18 Matches: 1(1) Sequences: 1(1) emPAI: 0.05  
Tyrosine-protein kinase etk OS=Escherichia coli (strain K12) OX=83333 GN=etk PE=1 SV=2  
Query Observed Mr(expt) Mr(calc) ppm Miss Score Expect Rank Unique Peptide  
[4508](#) 467.8997 1400.6773 1400.6754 1.35 1 18 0.038 1 U K.YFPVIGRGWAR.L
32. [3::P37327|YFDC\\_ECOLI](#) Mass: 34538 Score: 18 Matches: 1(1) Sequences: 1(1) emPAI: 0.13  
Inner membrane protein YfdC OS=Escherichia coli (strain K12) OX=83333 GN=yfdC PE=1 SV=1  
Query Observed Mr(expt) Mr(calc) ppm Miss Score Expect Rank Unique Peptide  
[1003](#) 465.7541 929.4936 929.4930 0.62 1 18 0.016 1 U K.AERAENIK.K
33. [3::V9HVX0|YPAA\\_ECOLI](#) Mass: 6876 Score: 18 Matches: 1(1) Sequences: 1(1) emPAI: 0.80  
Uncharacterized protein YpaA OS=Escherichia coli (strain K12) OX=83333 GN=yapaA PE=4 SV=1  
Query Observed Mr(expt) Mr(calc) ppm Miss Score Expect Rank Unique Peptide  
[5000](#) 732.8884 1463.7623 1463.7555 4.66 1 18 0.039 1 U K.IALRMLEGGFDR.D
34. [3::P16384|MIAA\\_ECOLI](#) Mass: 35157 Score: 18 Matches: 2(2) Sequences: 1(1) emPAI: 0.13  
tRNA dimethylallyltransferase OS=Escherichia coli (strain K12) OX=83333 GN=miaA PE=1 SV=2  
Query Observed Mr(expt) Mr(calc) ppm Miss Score Expect Rank Unique Peptide  
[2792](#) 390.8832 1169.6278 1169.6292 -1.23 0 17 0.025 1 U R.DEVLQVVGAIAG.-

35. [3::P63224|GMHA\\_ECOLI](#) Mass: 20973 Score: 18 Matches: 1(1) Sequences: 1(1) emPAI: 0.22  
Phosphoheptose isomerase OS=Escherichia coli (strain K12) OX=83333 GN=gmhA PE=1 SV=1  
Query Observed Mr(expt) Mr(calc) ppm Miss Score Expect Rank Unique Peptide  
[4854](#) 725.3482 1448.6817 1448.6929 -7.72 1 18 0.035 1 U K.DGGK**M**AGTADIEIR.V
- 
36. [3::POA823|YBGC\\_ECOLI](#) Mass: 15609 Score: 18 Matches: 1(1) Sequences: 1(1) emPAI: 0.31  
Acyl-CoA thioester hydrolase YbgC OS=Escherichia coli (strain K12) OX=83333 GN=ybgC PE=1 SV=1  
Query Observed Mr(expt) Mr(calc) ppm Miss Score Expect Rank Unique Peptide  
[3110](#) 406.1946 1215.5620 1215.5594 2.15 0 18 0.032 1 U K.**M**TVVEYYAPAR.L
- 
37. [1::sp|KRHB1\\_HUMAN|](#) Mass: 56875 Score: 18 Matches: 1(1) Sequences: 1(1) emPAI: 0.08  
sp|KRHB1\_HUMAN|  
Query Observed Mr(expt) Mr(calc) ppm Miss Score Expect Rank Unique Peptide  
[410](#) 406.2213 810.4280 810.4276 0.48 0 18 0.017 1 U R.FAA**F**IDK.V
- Proteins matching the same set of peptides:  
[1::sp|K2M2\\_SHEEP|](#) Mass: 55472 Score: 18 Matches: 1(1) Sequences: 1(1)  
sp|K2M2\_SHEEP|  
[1::sp|K2M3\\_SHEEP|](#) Mass: 56418 Score: 18 Matches: 1(1) Sequences: 1(1)  
sp|K2M3\_SHEEP|  
[1::sp|KRHB3\\_HUMAN|](#) Mass: 56004 Score: 18 Matches: 1(1) Sequences: 1(1)  
sp|KRHB3\_HUMAN|  
[1::sp|KRHB5\\_HUMAN|](#) Mass: 57306 Score: 18 Matches: 1(1) Sequences: 1(1)  
sp|KRHB5\_HUMAN|  
[1::sp|KRHB6\\_HUMAN|](#) Mass: 55120 Score: 18 Matches: 1(1) Sequences: 1(1)  
sp|KRHB6\_HUMAN|
- 
38. [3::P25772|LIGB\\_ECOLI](#) Mass: 63425 Score: 17 Matches: 1(1) Sequences: 1(1) emPAI: 0.07  
DNA ligase B OS=Escherichia coli (strain K12) OX=83333 GN=ligB PE=1 SV=2  
Query Observed Mr(expt) Mr(calc) ppm Miss Score Expect Rank Unique Peptide  
[150](#) 372.7220 743.4294 743.4290 0.57 0 17 0.018 2 U R.VNIGSVR.R
- 
39. [3::POA759|NAGB\\_ECOLI](#) Mass: 29983 Score: 17 Matches: 1(1) Sequences: 1(1) emPAI: 0.15  
Glucosamine-6-phosphate deaminase OS=Escherichia coli (strain K12) OX=83333 GN=nagB PE=1 SV=1  
Query Observed Mr(expt) Mr(calc) ppm Miss Score Expect Rank Unique Peptide  
[1221](#) 483.2577 964.5008 964.4978 3.20 1 17 0.039 1 U R.QYEEKIR.S
- 
40. [3::POADT8|YGI\\_M\\_ECOLI](#) Mass: 23062 Score: 17 Matches: 2(2) Sequences: 2(2) emPAI: 0.44  
Uncharacterized protein YgiM OS=Escherichia coli (strain K12) OX=83333 GN=ygiM PE=3 SV=1  
Query Observed Mr(expt) Mr(calc) ppm Miss Score Expect Rank Unique Peptide  
[1698](#) 521.2824 1040.5503 1040.5502 0.11 0 14 0.038 2 U R.VPDLENQVK.T  
[2732](#) 580.7935 1159.5725 1159.5721 0.33 0 16 0.028 2 U K.VDAASVQLDDK.Q
- 
41. [3::POAGD7|SRP54\\_ECOLI](#) Mass: 49812 Score: 17 Matches: 1(1) Sequences: 1(1) emPAI: 0.09  
Signal recognition particle protein OS=Escherichia coli (strain K12) OX=83333 GN=ffh PE=1 SV=1  
Query Observed Mr(expt) Mr(calc) ppm Miss Score Expect Rank Unique Peptide  
[1496](#) 505.7783 1009.5421 1009.5412 0.83 3 17 0.028 1 U K.K**M**KKGG**M**AK.M
- 
42. [1::sp|KRHB4\\_HUMAN|](#) Mass: 65938 Score: 17 Matches: 1(1) Sequences: 1(1) emPAI: 0.07  
sp|KRHB4\_HUMAN|  
Query Observed Mr(expt) Mr(calc) ppm Miss Score Expect Rank Unique Peptide  
[1552](#) 509.2826 1016.5506 1016.5502 0.43 2 17 0.028 2 U K.KDEKEIQIK.T
- 
43. [3::P77211|CUSC\\_ECOLI](#) Mass: 50410 Score: 17 Matches: 1(1) Sequences: 1(1) emPAI: 0.09  
Cation efflux system protein CusC OS=Escherichia coli (strain K12) OX=83333 GN=cusC PE=1 SV=1  
Query Observed Mr(expt) Mr(calc) ppm Miss Score Expect Rank Unique Peptide  
[9863](#) 789.7597 2366.2573 2366.2706 -5.61 1 17 0.047 2 U K.IEIPFNAGRNQANLDIAEIR.Q
- 
44. [3::P69811|PTFAH\\_ECOLI](#) Mass: 39624 Score: 17 Matches: 1(1) Sequences: 1(1) emPAI: 0.11  
Multiphosphoryl transfer protein OS=Escherichia coli (strain K12) OX=83333 GN=fruB PE=1 SV=1  
Query Observed Mr(expt) Mr(calc) ppm Miss Score Expect Rank Unique Peptide  
[6393](#) 540.2932 1617.8577 1617.8474 6.31 1 17 0.04 1 U R.LRFTAQGADEQALK.A
- 
45. [3::POAEF5|DGAL\\_ECOLI](#) Mass: 35690 Score: 17 Matches: 1(1) Sequences: 1(1) emPAI: 0.13  
D-galactose-binding periplasmic protein OS=Escherichia coli (strain K12) OX=83333 GN=mgIB PE=1 SV=1  
Query Observed Mr(expt) Mr(calc) ppm Miss Score Expect Rank Unique Peptide  
[839](#) 451.7506 901.4866 901.4869 -0.30 1 17 0.04 1 U R.KAIEQDAK.A
- 
46. [3::P15028|FECB\\_ECOLI](#) Mass: 33126 Score: 17 Matches: 1(1) Sequences: 1(1) emPAI: 0.14  
Fe(3+) dicitrate-binding periplasmic protein OS=Escherichia coli (strain K12) OX=83333 GN=fecB PE=2 SV=3  
Query Observed Mr(expt) Mr(calc) ppm Miss Score Expect Rank Unique Peptide  
[75](#) 359.2105 716.4065 716.4068 -0.44 0 17 0.021 1 U R.IAADTVK.I
- 
47. [3::Q06065|ATOC\\_ECOLI](#) Mass: 52428 Score: 17 Matches: 2(2) Sequences: 1(1) emPAI: 0.08  
Regulatory protein AtoC OS=Escherichia coli (strain K12) OX=83333 GN=atoC PE=1 SV=2  
Query Observed Mr(expt) Mr(calc) ppm Miss Score Expect Rank Unique Peptide  
[3531](#) 422.2157 1263.6252 1263.6203 3.93 1 16 0.046 1 U R.**M**PE**M**DG**I**KALK.E [3532](#)
- 
48. [3::P00634|PPB\\_ECOLI](#) Mass: 49636 Score: 17 Matches: 1(1) Sequences: 1(1) emPAI: 0.09  
Alkaline phosphatase OS=Escherichia coli (strain K12) OX=83333 GN=phoA PE=1 SV=1  
Query Observed Mr(expt) Mr(calc) ppm Miss Score Expect Rank Unique Peptide  
[3209](#) 614.2891 1226.5636 1226.5601 2.86 1 17 0.042 1 U R.KCYGPSATSEK.C

|                                                                                                                             |                                      |                           |                           |                           |                       |                                                                                                                                                           |
|-----------------------------------------------------------------------------------------------------------------------------|--------------------------------------|---------------------------|---------------------------|---------------------------|-----------------------|-----------------------------------------------------------------------------------------------------------------------------------------------------------|
| 49.                                                                                                                         | <a href="#">3::P06992 RSMA_ECOLI</a> | Mass: 30515               | Score: 17                 | Matches: 1(1)             | Sequences: 1(1)       | emPAI: 0.15                                                                                                                                               |
| Ribosomal RNA small subunit methyltransferase A OS=Escherichia coli (strain K12) OX=83333 GN=rsmA PE=1 SV=1                 |                                      |                           |                           |                           |                       |                                                                                                                                                           |
| Query                                                                                                                       | Observed                             | Mr(expt)                  | Mr(calc)                  | ppm                       | Miss Score            | Expect Rank Unique Peptide                                                                                                                                |
|                                                                                                                             | <a href="#">156</a>                  | <a href="#">373.2140</a>  | <a href="#">744.4135</a>  | <a href="#">744.4130</a>  | <a href="#">0.62</a>  | <a href="#">0</a> <a href="#">17</a> <a href="#">0.022</a> <a href="#">1</a> <a href="#">U</a> <a href="#">K.VDSAVVR.L</a>                                |
| 50.                                                                                                                         | <a href="#">3::P77377 WZXC_ECOLI</a> | Mass: 53886               | Score: 17                 | Matches: 1(1)             | Sequences: 1(1)       | emPAI: 0.08                                                                                                                                               |
| Lipopolysaccharide biosynthesis protein WzxC OS=Escherichia coli (strain K12) OX=83333 GN=wzxC PE=1 SV=1                    |                                      |                           |                           |                           |                       |                                                                                                                                                           |
| Query                                                                                                                       | Observed                             | Mr(expt)                  | Mr(calc)                  | ppm                       | Miss Score            | Expect Rank Unique Peptide                                                                                                                                |
|                                                                                                                             | <a href="#">5672</a>                 | <a href="#">510.6170</a>  | <a href="#">1528.8292</a> | <a href="#">1528.8395</a> | <a href="#">-6.75</a> | <a href="#">1</a> <a href="#">17</a> <a href="#">0.04</a> <a href="#">1</a> <a href="#">U</a> <a href="#">R.SVGNPIGSLLM<del>AKAR</del>.V</a>              |
| 51.                                                                                                                         | <a href="#">3::P33668 YBBC_ECOLI</a> | Mass: 14257               | Score: 16                 | Matches: 1(1)             | Sequences: 1(1)       | emPAI: 0.34                                                                                                                                               |
| Uncharacterized protein Ybbc OS=Escherichia coli (strain K12) OX=83333 GN=ybbc PE=2 SV=1                                    |                                      |                           |                           |                           |                       |                                                                                                                                                           |
| Query                                                                                                                       | Observed                             | Mr(expt)                  | Mr(calc)                  | ppm                       | Miss Score            | Expect Rank Unique Peptide                                                                                                                                |
|                                                                                                                             | <a href="#">1556</a>                 | <a href="#">509.7492</a>  | <a href="#">1017.4839</a> | <a href="#">1017.4896</a> | <a href="#">-5.57</a> | <a href="#">1</a> <a href="#">16</a> <a href="#">0.035</a> <a href="#">1</a> <a href="#">U</a> <a href="#">K.YSVKNLVK.T</a>                               |
| 52.                                                                                                                         | <a href="#">3::P80645 SSUD_ECOLI</a> | Mass: 41768               | Score: 16                 | Matches: 1(1)             | Sequences: 1(1)       | emPAI: 0.11                                                                                                                                               |
| Alkanesulfonate monooxygenase OS=Escherichia coli (strain K12) OX=83333 GN=ssuD PE=1 SV=3                                   |                                      |                           |                           |                           |                       |                                                                                                                                                           |
| Query                                                                                                                       | Observed                             | Mr(expt)                  | Mr(calc)                  | ppm                       | Miss Score            | Expect Rank Unique Peptide                                                                                                                                |
|                                                                                                                             | <a href="#">285</a>                  | <a href="#">387.7088</a>  | <a href="#">773.4031</a>  | <a href="#">773.4032</a>  | <a href="#">-0.03</a> | <a href="#">0</a> <a href="#">16</a> <a href="#">0.024</a> <a href="#">1</a> <a href="#">U</a> <a href="#">R.QAATLDR.L</a>                                |
| 53.                                                                                                                         | <a href="#">3::P13738 NHAA_ECOLI</a> | Mass: 41500               | Score: 16                 | Matches: 1(1)             | Sequences: 1(1)       | emPAI: 0.11                                                                                                                                               |
| Na(+)/H(+) antiporter NhaA OS=Escherichia coli (strain K12) OX=83333 GN=nhaA PE=1 SV=3                                      |                                      |                           |                           |                           |                       |                                                                                                                                                           |
| Query                                                                                                                       | Observed                             | Mr(expt)                  | Mr(calc)                  | ppm                       | Miss Score            | Expect Rank Unique Peptide                                                                                                                                |
|                                                                                                                             | <a href="#">12915</a>                | <a href="#">1014.3229</a> | <a href="#">4053.2625</a> | <a href="#">4053.2390</a> | <a href="#">5.80</a>  | <a href="#">2</a> <a href="#">16</a> <a href="#">0.024</a> <a href="#">1</a> <a href="#">U</a> <a href="#">R.RTGVYILVGVVLWIAVLKSGVHATLAGVIVGFFIPLK.E</a>  |
| 54.                                                                                                                         | <a href="#">3::P31434 XYLS_ECOLI</a> | Mass: 88764               | Score: 16                 | Matches: 1(1)             | Sequences: 1(1)       | emPAI: 0.05                                                                                                                                               |
| Alpha-xylosidase OS=Escherichia coli (strain K12) OX=83333 GN=yicI PE=1 SV=2                                                |                                      |                           |                           |                           |                       |                                                                                                                                                           |
| Query                                                                                                                       | Observed                             | Mr(expt)                  | Mr(calc)                  | ppm                       | Miss Score            | Expect Rank Unique Peptide                                                                                                                                |
|                                                                                                                             | <a href="#">1613</a>                 | <a href="#">514.2439</a>  | <a href="#">1026.4733</a> | <a href="#">1026.4648</a> | <a href="#">8.30</a>  | <a href="#">1</a> <a href="#">16</a> <a href="#">0.05</a> <a href="#">1</a> <a href="#">U</a> <a href="#">R.LHGSKSYR.V</a>                                |
| 55.                                                                                                                         | <a href="#">3::P76104 RLHA_ECOLI</a> | Mass: 73170               | Score: 16                 | Matches: 1(1)             | Sequences: 1(1)       | emPAI: 0.06                                                                                                                                               |
| 23S rRNA 5-hydroxycytidine C2501 synthase OS=Escherichia coli (strain K12) OX=83333 GN=rIhA PE=1 SV=2                       |                                      |                           |                           |                           |                       |                                                                                                                                                           |
| Query                                                                                                                       | Observed                             | Mr(expt)                  | Mr(calc)                  | ppm                       | Miss Score            | Expect Rank Unique Peptide                                                                                                                                |
|                                                                                                                             | <a href="#">217</a>                  | <a href="#">379.7296</a>  | <a href="#">757.4446</a>  | <a href="#">757.4446</a>  | <a href="#">0.05</a>  | <a href="#">1</a> <a href="#">16</a> <a href="#">0.03</a> <a href="#">2</a> <a href="#">U</a> <a href="#">K.QAKGNIK.S</a>                                 |
| 56.                                                                                                                         | <a href="#">3::P21893 RECJ_ECOLI</a> | Mass: 63634               | Score: 16                 | Matches: 1(1)             | Sequences: 1(1)       | emPAI: 0.07                                                                                                                                               |
| Single-stranded-DNA-specific exonuclease RecJ OS=Escherichia coli (strain K12) OX=83333 GN=recJ PE=1 SV=2                   |                                      |                           |                           |                           |                       |                                                                                                                                                           |
| Query                                                                                                                       | Observed                             | Mr(expt)                  | Mr(calc)                  | ppm                       | Miss Score            | Expect Rank Unique Peptide                                                                                                                                |
|                                                                                                                             | <a href="#">2098</a>                 | <a href="#">543.8044</a>  | <a href="#">1085.5943</a> | <a href="#">1085.6015</a> | <a href="#">-6.68</a> | <a href="#">1</a> <a href="#">16</a> <a href="#">0.043</a> <a href="#">1</a> <a href="#">U</a> <a href="#">-_MKQQIQLR.R</a>                               |
| 57.                                                                                                                         | <a href="#">3::P76016 DHAR_ECOLI</a> | Mass: 71088               | Score: 16                 | Matches: 1(1)             | Sequences: 1(1)       | emPAI: 0.06                                                                                                                                               |
| PTS-dependent dihydroxyacetone kinase operon regulatory protein OS=Escherichia coli (strain K12) OX=83333 GN=dhaR PE=1 SV=2 |                                      |                           |                           |                           |                       |                                                                                                                                                           |
| Query                                                                                                                       | Observed                             | Mr(expt)                  | Mr(calc)                  | ppm                       | Miss Score            | Expect Rank Unique Peptide                                                                                                                                |
|                                                                                                                             | <a href="#">8370</a>                 | <a href="#">634.6957</a>  | <a href="#">1901.0653</a> | <a href="#">1901.0638</a> | <a href="#">0.79</a>  | <a href="#">0</a> <a href="#">16</a> <a href="#">0.036</a> <a href="#">1</a> <a href="#">U</a> <a href="#">R.AIE<del>LL</del>TLPAVLQQA<del>IK</del>.Q</a> |
| 58.                                                                                                                         | <a href="#">3::P0AFE8 NUOM_ECOLI</a> | Mass: 56658               | Score: 16                 | Matches: 1(1)             | Sequences: 1(1)       | emPAI: 0.08                                                                                                                                               |
| NADH-quinone oxidoreductase subunit M OS=Escherichia coli (strain K12) OX=83333 GN=nuoM PE=1 SV=1                           |                                      |                           |                           |                           |                       |                                                                                                                                                           |
| Query                                                                                                                       | Observed                             | Mr(expt)                  | Mr(calc)                  | ppm                       | Miss Score            | Expect Rank Unique Peptide                                                                                                                                |
|                                                                                                                             | <a href="#">1065</a>                 | <a href="#">471.2400</a>  | <a href="#">940.4654</a>  | <a href="#">940.4743</a>  | <a href="#">-9.45</a> | <a href="#">1</a> <a href="#">16</a> <a href="#">0.029</a> <a href="#">1</a> <a href="#">U</a> <a href="#">K.TRITAAIK.F</a>                               |
| 59.                                                                                                                         | <a href="#">3::P09372 GRPE_ECOLI</a> | Mass: 21784               | Score: 16                 | Matches: 1(1)             | Sequences: 1(1)       | emPAI: 0.21                                                                                                                                               |
| Protein GrpE OS=Escherichia coli (strain K12) OX=83333 GN=grpE PE=1 SV=1                                                    |                                      |                           |                           |                           |                       |                                                                                                                                                           |
| Query                                                                                                                       | Observed                             | Mr(expt)                  | Mr(calc)                  | ppm                       | Miss Score            | Expect Rank Unique Peptide                                                                                                                                |
|                                                                                                                             | <a href="#">2088</a>                 | <a href="#">543.3196</a>  | <a href="#">1084.6246</a> | <a href="#">1084.6353</a> | <a href="#">-9.87</a> | <a href="#">2</a> <a href="#">16</a> <a href="#">0.038</a> <a href="#">1</a> <a href="#">U</a> <a href="#">R.ERDGLRVK.A</a>                               |
| 60.                                                                                                                         | <a href="#">3::P28917 YDCC_ECOLI</a> | Mass: 43507               | Score: 15                 | Matches: 1(1)             | Sequences: 1(1)       | emPAI: 0.10                                                                                                                                               |
| H repeat-associated putative transposase YdcC OS=Escherichia coli (strain K12) OX=83333 GN=ydcC PE=3 SV=1                   |                                      |                           |                           |                           |                       |                                                                                                                                                           |
| Query                                                                                                                       | Observed                             | Mr(expt)                  | Mr(calc)                  | ppm                       | Miss Score            | Expect Rank Unique Peptide                                                                                                                                |
|                                                                                                                             | <a href="#">723</a>                  | <a href="#">439.2244</a>  | <a href="#">876.4342</a>  | <a href="#">876.4375</a>  | <a href="#">-3.72</a> | <a href="#">0</a> <a href="#">15</a> <a href="#">0.028</a> <a href="#">1</a> <a href="#">U</a> <a href="#">K.ELEMTVR.Y</a>                                |
| 61.                                                                                                                         | <a href="#">3::P37007 YAGA_ECOLI</a> | Mass: 44026               | Score: 15                 | Matches: 1(1)             | Sequences: 1(1)       | emPAI: 0.10                                                                                                                                               |
| Uncharacterized protein YagA OS=Escherichia coli (strain K12) OX=83333 GN=yagA PE=2 SV=3                                    |                                      |                           |                           |                           |                       |                                                                                                                                                           |
| Query                                                                                                                       | Observed                             | Mr(expt)                  | Mr(calc)                  | ppm                       | Miss Score            | Expect Rank Unique Peptide                                                                                                                                |
|                                                                                                                             | <a href="#">217</a>                  | <a href="#">379.7296</a>  | <a href="#">757.4446</a>  | <a href="#">757.4446</a>  | <a href="#">0.03</a>  | <a href="#">1</a> <a href="#">15</a> <a href="#">0.034</a> <a href="#">3</a> <a href="#">U</a> <a href="#">R.GERVGLK.E</a>                                |
| 62.                                                                                                                         | <a href="#">3::P28912 YHHI_ECOLI</a> | Mass: 43574               | Score: 15                 | Matches: 1(1)             | Sequences: 1(1)       | emPAI: 0.10                                                                                                                                               |
| H repeat-associated putative transposase YhhI OS=Escherichia coli (strain K12) OX=83333 GN=yhhI PE=3 SV=1                   |                                      |                           |                           |                           |                       |                                                                                                                                                           |
| Query                                                                                                                       | Observed                             | Mr(expt)                  | Mr(calc)                  | ppm                       | Miss Score            | Expect Rank Unique Peptide                                                                                                                                |
|                                                                                                                             | <a href="#">2081</a>                 | <a href="#">362.4979</a>  | <a href="#">1084.4720</a> | <a href="#">1084.4624</a> | <a href="#">8.86</a>  | <a href="#">1</a> <a href="#">15</a> <a href="#">0.034</a> <a href="#">1</a> <a href="#">U</a> <a href="#">K.KEPE<del>TL</del>VR.Y</a>                    |
| Proteins matching the same set of peptides:                                                                                 |                                      |                           |                           |                           |                       |                                                                                                                                                           |
|                                                                                                                             | <a href="#">3::P75741 YBFL_ECOLI</a> | Mass: 43532               | Score: 15                 | Matches: 1(1)             | Sequences: 1(1)       |                                                                                                                                                           |
| Putative protein Ybfl OS=Escherichia coli (strain K12) OX=83333 GN=ybfl PE=5 SV=3                                           |                                      |                           |                           |                           |                       |                                                                                                                                                           |
| 63.                                                                                                                         | <a href="#">3::P28630 HOLA_ECOLI</a> | Mass: 38965               | Score: 15                 | Matches: 1(1)             | Sequences: 1(1)       | emPAI: 0.12                                                                                                                                               |
| DNA polymerase III subunit delta OS=Escherichia coli (strain K12) OX=83333 GN=hoIA PE=1 SV=1                                |                                      |                           |                           |                           |                       |                                                                                                                                                           |
| Query                                                                                                                       | Observed                             | Mr(expt)                  | Mr(calc)                  | ppm                       | Miss Score            | Expect Rank Unique Peptide                                                                                                                                |
|                                                                                                                             | <a href="#">995</a>                  | <a href="#">464.7822</a>  | <a href="#">927.5499</a>  | <a href="#">927.5502</a>  | <a href="#">-0.29</a> | <a href="#">0</a> <a href="#">15</a> <a href="#">0.031</a> <a href="#">1</a> <a href="#">U</a> <a href="#">R.QAVQLLTR.T</a>                               |
| 64.                                                                                                                         | <a href="#">3::P0AAK7 NRFC_ECOLI</a> | Mass: 25464               | Score: 15                 | Matches: 1(1)             | Sequences: 1(1)       | emPAI: 0.18                                                                                                                                               |
| Protein NrfC OS=Escherichia coli (strain K12) OX=83333 GN=nrfC PE=3 SV=1                                                    |                                      |                           |                           |                           |                       |                                                                                                                                                           |
| Query                                                                                                                       | Observed                             | Mr(expt)                  | Mr(calc)                  | ppm                       | Miss Score            | Expect Rank Unique Peptide                                                                                                                                |

628 430.2534 858.4923 858.4923 0.02 1 15 0.048 1 U R.KTLQAGK.L

65. [3::P37650|BCSC\\_ECOLI](#) Mass: 127760 Score: 15 Matches: 1(1) Sequences: 1(1) emPAI: 0.03

Cellulose synthase operon protein C OS=Escherichia coli (strain K12) OX=83333 GN=bcsC PE=1 SV=3  
Query Observed Mr(expt) Mr(calc) ppm Miss Score Expect Rank Unique Peptide  
[1282](#) 488.7422 975.4699 975.4733 -3.52 1 15 0.043 2 U K.SNAGREGASK.I

66. [3::POAFB8|NTRC\\_ECOLI](#) Mass: 52336 Score: 15 Matches: 1(1) Sequences: 1(1) emPAI: 0.08

DNA-binding transcriptional regulator NtrC OS=Escherichia coli (strain K12) OX=83333 GN=glnG PE=1 SV=1  
Query Observed Mr(expt) Mr(calc) ppm Miss Score Expect Rank Unique Peptide  
[681](#) 435.7076 869.4006 869.4048 -4.84 0 15 0.04 1 U R.VGGYAPVK.V

67. [3::POAG96|SECF\\_ECOLI](#) Mass: 13635 Score: 15 Matches: 1(1) Sequences: 1(1) emPAI: 0.36

Protein translocase subunit SecE OS=Escherichia coli (strain K12) OX=83333 GN=secE PE=1 SV=1  
Query Observed Mr(expt) Mr(calc) ppm Miss Score Expect Rank Unique Peptide  
[1455](#) 503.3082 1004.6019 1004.6019 0.08 0 15 0.035 1 U R.LVSFITGLR.F

68. [3::P02925|RBSB\\_ECOLI](#) Mass: 30931 Score: 14 Matches: 1(1) Sequences: 1(1) emPAI: 0.15

Ribose import binding protein RbsB OS=Escherichia coli (strain K12) OX=83333 GN=rbsB PE=1 SV=1  
Query Observed Mr(expt) Mr(calc) ppm Miss Score Expect Rank Unique Peptide  
[1196](#) 481.2367 960.4588 960.4512 7.90 1 14 0.037 1 U K.DGAQKADK.L

69. [3::POAEG4|DSBA\\_ECOLI](#) Mass: 23204 Score: 14 Matches: 1(1) Sequences: 1(1) emPAI: 0.20

Thiol:disulfide interchange protein DsbA OS=Escherichia coli (strain K12) OX=83333 GN=dsbA PE=1 SV=1  
Query Observed Mr(expt) Mr(calc) ppm Miss Score Expect Rank Unique Peptide  
[3068](#) 605.8174 1209.6203 1209.6192 0.92 2 14 0.05 1 U K.KLPEGVKMK.Y

70. [3::P77766|RNAAM\\_ECOLI](#) Score: 14 Matches: 1(1) Sequences: 1(1)

5'-3' exoribonuclease OS=Escherichia coli (strain K12) OX=83333 GN=yoiV PE=1 SV=1  
Query Observed Mr(expt) Mr(calc) ppm Miss Score Expect Rank Unique Peptide  
[369](#) 400.7352 799.4558 799.4552 0.77 0 14 0.042 2 U R.AQLIAER.L

71. [3::P39347|INTB\\_ECOLI](#) Mass: 45725 Score: 14 Matches: 1(1) Sequences: 1(1) emPAI: 0.10

Putative protein IntB OS=Escherichia coli (strain K12) OX=83333 GN=intB PE=5 SV=1  
Query Observed Mr(expt) Mr(calc) ppm Miss Score Expect Rank Unique Peptide  
[2577](#) 381.8837 1142.6292 1142.6196 8.33 0 14 0.048 1 U M\_HLLVHPNGSK.Y

72. [3::P00957|SYA\\_ECOLI](#) Mass: 96315 Score: 14 Matches: 1(1) Sequences: 1(1) emPAI: 0.05

Alanine--tRNA ligase OS=Escherichia coli (strain K12) OX=83333 GN=alaS PE=1 SV=2  
Query Observed Mr(expt) Mr(calc) ppm Miss Score Expect Rank Unique Peptide  
[455](#) 412.2393 822.4640 822.4712 -8.74 0 14 0.04 1 U R.VIADHIR.S

73. [3::P16869|FHUE\\_ECOLI](#) Mass: 81239 Score: 14 Matches: 1(1) Sequences: 1(1) emPAI: 0.05

FhuE receptor OS=Escherichia coli (strain K12) OX=83333 GN=fhuE PE=1 SV=2  
Query Observed Mr(expt) Mr(calc) ppm Miss Score Expect Rank Unique Peptide  
[3632](#) 638.2583 1274.5021 1274.5114 -7.30 0 14 0.043 1 U R.LITLAIFR.I

74. [3::P77658|YNAA\\_ECOLI](#) Mass: 37094 Score: 14 Matches: 1(1) Sequences: 1(1) emPAI: 0.12

Protein YnaA OS=Escherichia coli (strain K12) OX=83333 GN=ynaA PE=4 SV=1  
Query Observed Mr(expt) Mr(calc) ppm Miss Score Expect Rank Unique Peptide  
[1009](#) 465.7793 929.5440 929.5406 3.59 2 14 0.042 1 U R.KIOETRR.E

75. [3::P50456|MLC\\_ECOLI](#) Mass: 44516 Score: 14 Matches: 1(1) Sequences: 1(1) emPAI: 0.10

Protein mlc OS=Escherichia coli (strain K12) OX=83333 GN=mlc PE=1 SV=2  
Query Observed Mr(expt) Mr(calc) ppm Miss Score Expect Rank Unique Peptide  
[1724](#) 522.7363 1043.4580 1043.4634 -5.19 0 14 0.045 1 U R.MPFYEDVK.E

76. [3::P02943|LAMB\\_ECOLI](#) Mass: 49995 Score: 14 Matches: 1(1) Sequences: 1(1) emPAI: 0.09

Maltoporin OS=Escherichia coli (strain K12) OX=83333 GN=lamb PE=1 SV=1  
Query Observed Mr(expt) Mr(calc) ppm Miss Score Expect Rank Unique Peptide  
[113](#) 366.2239 730.4332 730.4337 -0.75 0 14 0.043 1 U K.LSLAATR.S

77. [3::POADF6|EDD\\_ECOLI](#) Mass: 65054 Score: 14 Matches: 1(1) Sequences: 1(1) emPAI: 0.07

Phosphogluconate dehydratase OS=Escherichia coli (strain K12) OX=83333 GN=edd PE=1 SV=1  
Query Observed Mr(expt) Mr(calc) ppm Miss Score Expect Rank Unique Peptide  
[2](#) 350.1556 698.2967 698.3000 -4.78 0 14 0.043 1 U R.LSGASGK.V

78. [3::P37902|GLTI\\_ECOLI](#) Score: 14 Matches: 1(1) Sequences: 1(1)

Glutamate/aspartate import solute-binding protein OS=Escherichia coli (strain K12) OX=83333 GN=glti PE=1 SV=2  
Query Observed Mr(expt) Mr(calc) ppm Miss Score Expect Rank Unique Peptide  
[723](#) 439.2244 876.4342 876.4341 0.11 1 14 0.045 2 U R.KDDPQFK.K

79. [3::P28635|METO\\_ECOLI](#) Mass: 29471 Score: 13 Matches: 1(1) Sequences: 1(1) emPAI: 0.15

D-methionine-binding lipoprotein MetQ OS=Escherichia coli (strain K12) OX=83333 GN=metQ PE=1 SV=2  
Query Observed Mr(expt) Mr(calc) ppm Miss Score Expect Rank Unique Peptide  
[350](#) 396.2241 790.4336 790.4337 -0.17 0 13 0.046 1 U K.VFNGGAVK.G

80. [3::P23842|PDEA\\_ECOLI](#) Mass: 84325 Score: 13 Matches: 1(1) Sequences: 1(1) emPAI: 0.05

Probable cyclic di-GMP phosphodiesterase PdeA OS=Escherichia coli (strain K12) OX=83333 GN=pdeA PE=2 SV=2  
Query Observed Mr(expt) Mr(calc) ppm Miss Score Expect Rank Unique Peptide  
[11012](#) 577.1268 2880.5974 2880.6176 -7.03 3 13 0.047 1 U R.FSVNL\_MPLILLKKNIAGRIRLRFK.R



81. [3::P56258|WECF\\_ECOLI](#) Mass: 40899 Score: 13 Matches: 1(1) Sequences: 1(1) emPAI: 0.11  
TDP-N-acetylfucosamine:lipid II N-acetylfucosaminyltransferase OS=Escherichia coli (strain K12) OX=83333 GN=wecF PE=1 SV=2  
Query Observed Mr(expt) Mr(calc) ppm Miss Score Expect Rank Unique Peptide  
529 420.6980 839.3815 839.3790 2.98 0 13 0.047 1 U R.QLASVDK.N

82. [3::P31224|ACRB\\_ECOLI](#) Mass: 113615 Score: 13 Matches: 1(1) Sequences: 1(1) emPAI: 0.04  
Multidrug efflux pump subunit AcrB OS=Escherichia coli (strain K12) OX=83333 GN=acrB PE=1 SV=1  
Query Observed Mr(expt) Mr(calc) ppm Miss Score Expect Rank Unique Peptide  
632 430.7217 859.4288 859.4287 0.11 0 13 0.05 1 U K.IDIDQEK.A

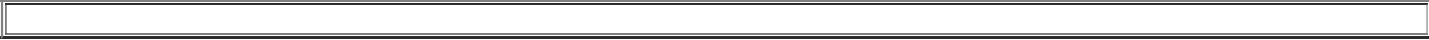

Supplement: 41467_2023_44089_MOESM12_ESM.pdf [file 41467_2023_44089_MOESM12_ESM.pdf]
