# Supplementary material for: ERK2-topoisomerase II regulatory axis is important for gene activation in immediate early genes
Source: Springer Nature journal article supplement (doi:10.1038/s41467-023-44089-y), 2023-12-14
Supplement: 41467_2023_44089_MOESM3_ESM.pdf [file 41467_2023_44089_MOESM3_ESM.pdf]

## Description of Additional Supplementary Files

File Name: Supplementary Data 1

Description: Mass spectrometry data- deTOP2B control

File Name: Supplementary Data 2

Description: Mass spectrometry data- deTOP2B with ERK1

File Name: Supplementary Data 3

Description: Mass spectrometry data- deTOP2B with ERK2

File Name: Supplementary Data 4

Description: Mass spectrometry data- deTOP2B with ERK1m

File Name: Supplementary Data 5

Description: Mass spectrometry data- deTOP2B with ERK2m

File Name: Supplementary Data 6

Description: Mass spectrometry data- spectrum

File Name: Supplementary Data 7

Description: Mass spectrometry data-CTRL reaction against *E. coli* proteome

File Name: Supplementary Data 8

Description: Mass spectrometry data-ERK1m reaction against *E. coli* proteome

File Name: Supplementary Data 9

Description: Mass spectrometry data-ERK2m reaction against *E. coli* proteome
