# Supplementary material for: ERK2-topoisomerase II regulatory axis is important for gene activation in immediate early genes
Source: Springer Nature journal article supplement (doi:10.1038/s41467-023-44089-y), 2023-12-14
Supplement: 41467_2023_44089_MOESM7_ESM.pdf [file 41467_2023_44089_MOESM7_ESM.pdf]

# MASCOT Search Results

## Protein View: Q02880

DNA topoisomerase 2-beta OS=Homo sapiens OX=9606 GN=TOP2B PE=1 SV=3

Database: Uniprot\_Proteome\_Human  
Score: 17894  
Monoisotopic mass (M<sub>r</sub>): 184122  
Calculated pI: 8.14

Sequence similarity is available as [an NCBI BLAST search of Q02880 against nr.](#)

### Search parameters

MS data file: File Name: Z:\SN22\SN221365\_deTOP2B\_Erk1ml\_lul.raw; File Path: ; File Time: 3/1/2023 3:35:46 PM; File Size: 351320790 [Byte]  
Enzyme: Trypsin: cuts C-term side of KR unless next residue is P.  
Fixed modifications: **Carbamidomethyl (C)**  
Variable modifications: **Acetyl (Protein N-term), Oxidation (M), Phospho (ST), Phospho (Y)**

### Protein sequence coverage: 63%

Matched peptides shown in **bold red**.

```
1 MAKSGGCGAG AGVGGGNGAL TWVTLFDQNN AAKKEESETA NKNDSKKLS
51 VERVYQKKTQ LEHILLRPDT YIGSVEPLTQ FMWVYDEDVG MNCREVTFVP
101 GLYKIFDEIL VNAADNKQRD KNMTCIKVSI DPESNIISIW NNGKGIPVVE
151 HKVEKVVVPA LIFGQLTSS NYDDDEKKVT GGRNGYGAKL CNIFSTKFTV
201 ETACKKEYKHS FKQTWMNNM KTSEAKIKHF DGEDYTCITF QPDLSKFKME
251 KLDKDIVALM TRRAYDLAS CRGVKVMFNG KKLVPVNGFRS YVDLYVKDKL
301 DETGVALKVI HELANERDV CLTlsekgfQ QISFVNSIAT TKGGRHVDYV
351 VDQVVGLIE VVKKKNKAGV SVKPFQVKNH IWVFNCLIE NPFFDSQTK
401 NMTLQPKSFG SKCQLSEKFF KAASNCGIVE SILNWVKFKA QTQLNKKCSS
451 VKYSKIKGIP KLDDANDAGG KHSLECTLIL TEGDSAKSLA VSGLGVIGRD
501 RYGVFPLRGK ILNVREASHK QIMENAEINN IIKIVGLQYK KSYDDAESLK
551 TLRYGKIMIM TDQDQDGSHI KGLLINFIHH NWPSLLKHGF LEEFITPIVK
601 ASKNKQELSF YSIPEFDEWK KHIENQKAWK IKYYKGLGTS TAKEAKEYFA
651 DMERHRILFR YAGPEDDAAI TLAFSKKKID DRKEWLTNFM EDRRQRRLHG
701 LPEQFLYGTA TKHLYNDFI NKELILFSNS DNERSIPSLV DGFKPGQRKV
751 LFTCFKRNDK REVKVAQLAG SVAEMSAYHH GEQALMMTIV NLAQNFVGSN
801 NINLLQPIGQ FGTRLHGGKD AASPRYIFTM LSTLARLLFP AVDDNLLKFL
851 YDDNQRVEPE WYIPIPMVL INGAEIGITG WACKLPNYDA REIVNVRRM
901 LDGLDPHPLM PNYKNFGTI QELGONQYAV SGEIFVVDRN TVEITELPVR
951 TWTQVYKEQV LEPLNGTDK TPALISDYKE YHTDTTVKFV VKMTEEKLQ
1001 AEAAGLHKVF KLQTTLTCNS MVLFDHMGCL KKYETVQDIL KEFFDLRLSY
1051 YGLRKEWLVG MLGAESTKLN NQARFILEKI QGKITIENRS KKDLIQMLVQ
1101 RGYEDVPVKA WKEAQEKAAE EDETQNQHDD SSSDSGTPSG PDFNYIILMS
1151 LWSLTKEKVE ELIKQRDAKG REVNDLKRKS PSDLWKEDLA AFVEELDKVE
1201 SQEREDVLAG MSGKAIKGV GKPKVKLQL EETMPSPYGR RIIPEITAMK
1251 ADASKKLLKK KKGDLTAAV KVEFDEEFSG APVEGAGEEA LTPSVPINKG
1301 PKPKREKKEP GTRVRKTPTS SGKPSAKKVK KRNPWSDDES KESDLEETE
1351 PVVIPRDSLL RRAAERPKY TFDFSEEEDD DADDDDDDN DLEELKVKAS
1401 PITNDGEDEF VPSDGLKDE YTFSPGKSKA TPEKSLHDKK SQDFGNLFSF
1451 PSYSQKSEDD SAKFDSNEED SASVFSPSFG LKQTDKVPSK TVAAKGKPS
1501 SDTVPKPKRA PKQKVVEAV NSDSDSEFGI PKKTTPKGK GRGAKRRKAS
1551 SENEGDYNP GRKTSKTSK KPKTSFDQD SDVDIFPSDF PTEPPSLPRT
1601 GRARKEVKYF AESDEEDDV DFAMFN
```

Unformatted sequence string: **1626 residues** (for pasting into other applications).

Sort by  residue number  increasing mass  decreasing mass  
Show  matched peptides only  predicted peptides also

| Query                | Start - End | Observed | Mr (expt) | Mr (calc) | ppm   | M | Score | Expect  | Rank | U | Peptide           |
|----------------------|-------------|----------|-----------|-----------|-------|---|-------|---------|------|---|-------------------|
| <a href="#">1771</a> | 34 - 42     | 518.2516 | 1034.4887 | 1034.4880 | 0.71  | 1 | 38    | 0.0089  | 1    | U | K.KEESETANK.N     |
| <a href="#">2778</a> | 95 - 104    | 576.8184 | 1151.6222 | 1151.6227 | -0.36 | 0 | 16    | 0.032   | 1    |   | R.EVTFVPGLYK.I    |
| <a href="#">2779</a> | 95 - 104    | 576.8185 | 1151.6224 | 1151.6227 | -0.21 | 0 | 16    | 0.031   | 1    |   | R.EVTFVPGLYK.I    |
| <a href="#">2782</a> | 95 - 104    | 576.8186 | 1151.6227 | 1151.6227 | 0.020 | 0 | 19    | 0.04    | 1    |   | R.EVTFVPGLYK.I    |
| <a href="#">2784</a> | 95 - 104    | 576.8186 | 1151.6227 | 1151.6227 | 0.055 | 0 | 19    | 0.016   | 1    |   | R.EVTFVPGLYK.I    |
| <a href="#">2788</a> | 95 - 104    | 576.8188 | 1151.6231 | 1151.6227 | 0.37  | 0 | 28    | 0.013   | 1    |   | R.EVTFVPGLYK.I    |
| <a href="#">5151</a> | 105 - 117   | 487.9234 | 1460.7483 | 1460.7511 | -1.88 | 0 | 34    | 0.0044  | 1    |   | K.IFDEILVNAADNK.Q |
| <a href="#">5152</a> | 105 - 117   | 487.9235 | 1460.7486 | 1460.7511 | -1.69 | 0 | 27    | 0.019   | 1    |   | K.IFDEILVNAADNK.Q |
| <a href="#">5153</a> | 105 - 117   | 731.3818 | 1460.7490 | 1460.7511 | -1.39 | 0 | 82    | 3.6e-07 | 1    |   | K.IFDEILVNAADNK.Q |
| <a href="#">5155</a> | 105 - 117   | 487.9240 | 1460.7501 | 1460.7511 | -0.71 | 0 | 27    | 0.036   | 1    |   | K.IFDEILVNAADNK.Q |
| <a href="#">5156</a> | 105 - 117   | 487.9240 | 1460.7501 | 1460.7511 | -0.71 | 0 | 25    | 0.014   | 1    |   | K.IFDEILVNAADNK.Q |
| <a href="#">5157</a> | 105 - 117   | 731.3824 | 1460.7503 | 1460.7511 | -0.53 | 0 | 63    | 1.2e-05 | 1    |   | K.IFDEILVNAADNK.Q |
| <a href="#">5158</a> | 105 - 117   | 487.9240 | 1460.7503 | 1460.7511 | -0.52 | 0 | 49    | 0.00017 | 1    |   | K.IFDEILVNAADNK.Q |
| <a href="#">5159</a> | 105 - 117   | 487.9241 | 1460.7504 | 1460.7511 | -0.44 | 0 | 28    | 0.013   | 1    |   | K.IFDEILVNAADNK.Q |
| <a href="#">5160</a> | 105 - 117   | 731.3825 | 1460.7505 | 1460.7511 | -0.39 | 0 | 71    | 1.6e-06 | 1    |   | K.IFDEILVNAADNK.Q |

| Query | Start - End | Observed  | Mr (expt) | Mr (calc) | ppm     | M | Score | Expect  | Rank | U   | Peptide                              |
|-------|-------------|-----------|-----------|-----------|---------|---|-------|---------|------|-----|--------------------------------------|
| 5161  | 105 - 117   | 487.9241  | 1460.7505 | 1460.7511 | -0.38   | 0 | 35    | 0.01    | 1    | ... | K.IFDEILVNAADNK.Q                    |
| 5163  | 105 - 117   | 731.3827  | 1460.7508 | 1460.7511 | -0.22   | 0 | 68    | 2.3e-06 | 1    | ... | K.IFDEILVNAADNK.Q                    |
| 5164  | 105 - 117   | 487.9242  | 1460.7508 | 1460.7511 | -0.19   | 0 | 46    | 0.00048 | 1    | ... | K.IFDEILVNAADNK.Q                    |
| 5165  | 105 - 117   | 487.9243  | 1460.7510 | 1460.7511 | -0.069  | 0 | 33    | 0.0093  | 1    | ... | K.IFDEILVNAADNK.Q                    |
| 5166  | 105 - 117   | 487.9243  | 1460.7510 | 1460.7511 | -0.049  | 0 | 33    | 0.0031  | 1    | ... | K.IFDEILVNAADNK.Q                    |
| 5167  | 105 - 117   | 487.9243  | 1460.7511 | 1460.7511 | -0.0075 | 0 | 33    | 0.0065  | 1    | ... | K.IFDEILVNAADNK.Q                    |
| 5168  | 105 - 117   | 487.9243  | 1460.7511 | 1460.7511 | 0.034   | 0 | 23    | 0.027   | 1    | ... | K.IFDEILVNAADNK.Q                    |
| 5169  | 105 - 117   | 731.3828  | 1460.7511 | 1460.7511 | 0.044   | 0 | 74    | 1.7e-06 | 1    | ... | K.IFDEILVNAADNK.Q                    |
| 5170  | 105 - 117   | 487.9243  | 1460.7512 | 1460.7511 | 0.054   | 0 | 27    | 0.031   | 1    | ... | K.IFDEILVNAADNK.Q                    |
| 5171  | 105 - 117   | 487.9243  | 1460.7512 | 1460.7511 | 0.054   | 0 | 27    | 0.016   | 1    | ... | K.IFDEILVNAADNK.Q                    |
| 5172  | 105 - 117   | 731.3829  | 1460.7512 | 1460.7511 | 0.072   | 0 | 71    | 1.6e-06 | 1    | ... | K.IFDEILVNAADNK.Q                    |
| 5173  | 105 - 117   | 487.9244  | 1460.7512 | 1460.7511 | 0.095   | 0 | 25    | 0.03    | 1    | ... | K.IFDEILVNAADNK.Q                    |
| 5174  | 105 - 117   | 731.3829  | 1460.7512 | 1460.7511 | 0.11    | 0 | 71    | 1.4e-06 | 1    | ... | K.IFDEILVNAADNK.Q                    |
| 5175  | 105 - 117   | 487.9244  | 1460.7513 | 1460.7511 | 0.14    | 0 | 29    | 0.026   | 1    | ... | K.IFDEILVNAADNK.Q                    |
| 5176  | 105 - 117   | 487.9244  | 1460.7513 | 1460.7511 | 0.14    | 0 | 38    | 0.002   | 1    | ... | K.IFDEILVNAADNK.Q                    |
| 5177  | 105 - 117   | 487.9244  | 1460.7513 | 1460.7511 | 0.16    | 0 | 28    | 0.031   | 1    | ... | K.IFDEILVNAADNK.Q                    |
| 5178  | 105 - 117   | 731.3829  | 1460.7513 | 1460.7511 | 0.17    | 0 | 78    | 4.6e-07 | 1    | ... | K.IFDEILVNAADNK.Q                    |
| 5179  | 105 - 117   | 731.3830  | 1460.7514 | 1460.7511 | 0.24    | 0 | 71    | 1.7e-06 | 1    | ... | K.IFDEILVNAADNK.Q                    |
| 5180  | 105 - 117   | 487.9244  | 1460.7515 | 1460.7511 | 0.26    | 0 | 27    | 0.014   | 1    | ... | K.IFDEILVNAADNK.Q                    |
| 5181  | 105 - 117   | 731.3830  | 1460.7515 | 1460.7511 | 0.26    | 0 | 62    | 3.2e-05 | 1    | ... | K.IFDEILVNAADNK.Q                    |
| 5182  | 105 - 117   | 731.3830  | 1460.7515 | 1460.7511 | 0.29    | 0 | 70    | 4.1e-06 | 1    | ... | K.IFDEILVNAADNK.Q                    |
| 5183  | 105 - 117   | 731.3831  | 1460.7516 | 1460.7511 | 0.37    | 0 | 65    | 1.8e-05 | 1    | ... | K.IFDEILVNAADNK.Q                    |
| 5184  | 105 - 117   | 487.9245  | 1460.7518 | 1460.7511 | 0.46    | 0 | 37    | 0.018   | 1    | ... | K.IFDEILVNAADNK.Q                    |
| 5185  | 105 - 117   | 487.9245  | 1460.7518 | 1460.7511 | 0.49    | 0 | 31    | 0.004   | 1    | ... | K.IFDEILVNAADNK.Q                    |
| 5186  | 105 - 117   | 731.3832  | 1460.7519 | 1460.7511 | 0.55    | 0 | 70    | 2.5e-06 | 1    | ... | K.IFDEILVNAADNK.Q                    |
| 5187  | 105 - 117   | 731.3833  | 1460.7521 | 1460.7511 | 0.70    | 0 | 66    | 4.3e-06 | 1    | ... | K.IFDEILVNAADNK.Q                    |
| 1704  | 120 - 127   | 513.2408  | 1024.4670 | 1024.4681 | -1.14   | 1 | 30    | 0.036   | 1    | U   | R.DKNMTCIK.V<br>+ Oxidation (M)      |
| 8521  | 128 - 144   | 629.3266  | 1884.9581 | 1884.9581 | -0.012  | 0 | 59    | 1.9e-05 | 1    | U   | K.VSIDPESNIISIWNNGK.G                |
| 8522  | 128 - 144   | 943.4865  | 1884.9584 | 1884.9581 | 0.14    | 0 | 77    | 2e-07   | 1    | U   | K.VSIDPESNIISIWNNGK.G                |
| 758   | 145 - 152   | 439.7584  | 877.5023  | 877.5022  | 0.18    | 0 | 34    | 0.011   | 1    | ... | K.GIPVVEHK.V                         |
| 10538 | 156 - 177   | 1244.1162 | 2486.2178 | 2486.2217 | -1.57   | 0 | 74    | 4.4e-06 | 1    | U   | K.VYVPALIFGQLLTSSNYDDEK.K            |
| 10541 | 156 - 177   | 829.7480  | 2486.2220 | 2486.2217 | 0.14    | 0 | 37    | 0.0027  | 1    | U   | K.VYVPALIFGQLLTSSNYDDEK.K            |
| 10542 | 156 - 177   | 829.7480  | 2486.2221 | 2486.2217 | 0.15    | 0 | 19    | 0.035   | 1    | U   | K.VYVPALIFGQLLTSSNYDDEK.K            |
| 10543 | 156 - 177   | 1244.1184 | 2486.2222 | 2486.2217 | 0.20    | 0 | 52    | 0.0001  | 1    | U   | K.VYVPALIFGQLLTSSNYDDEK.K            |
| 10545 | 156 - 177   | 1244.1186 | 2486.2226 | 2486.2217 | 0.39    | 0 | 86    | 2.7e-08 | 1    | U   | K.VYVPALIFGQLLTSSNYDDEK.K            |
| 10547 | 156 - 177   | 829.7482  | 2486.2228 | 2486.2217 | 0.44    | 0 | 54    | 6.1e-05 | 1    | U   | K.VYVPALIFGQLLTSSNYDDEK.K            |
| 10548 | 156 - 177   | 1244.1187 | 2486.2229 | 2486.2217 | 0.49    | 0 | 78    | 1.6e-07 | 1    | U   | K.VYVPALIFGQLLTSSNYDDEK.K            |
| 10550 | 156 - 177   | 1244.1192 | 2486.2239 | 2486.2217 | 0.89    | 0 | 62    | 4.7e-06 | 1    | U   | K.VYVPALIFGQLLTSSNYDDEK.K            |
| 10551 | 156 - 177   | 1244.1208 | 2486.2270 | 2486.2217 | 2.16    | 0 | 41    | 0.0011  | 1    | U   | K.VYVPALIFGQLLTSSNYDDEK.K            |
| 10813 | 156 - 178   | 872.4447  | 2614.3124 | 2614.3166 | -1.62   | 1 | 40    | 0.0058  | 1    | U   | K.VYVPALIFGQLLTSSNYDDEK.V            |
| 10815 | 156 - 178   | 872.4458  | 2614.3156 | 2614.3166 | -0.38   | 1 | 54    | 0.00016 | 1    | U   | K.VYVPALIFGQLLTSSNYDDEK.V            |
| 10817 | 156 - 178   | 872.4462  | 2614.3168 | 2614.3166 | 0.052   | 1 | 46    | 0.0026  | 1    | U   | K.VYVPALIFGQLLTSSNYDDEK.V            |
| 10818 | 156 - 178   | 872.4462  | 2614.3169 | 2614.3166 | 0.11    | 1 | 47    | 0.0013  | 1    | U   | K.VYVPALIFGQLLTSSNYDDEK.V            |
| 10819 | 156 - 178   | 654.5865  | 2614.3169 | 2614.3166 | 0.12    | 1 | 47    | 0.0024  | 1    | U   | K.VYVPALIFGQLLTSSNYDDEK.V            |
| 10821 | 156 - 178   | 654.5866  | 2614.3171 | 2614.3166 | 0.18    | 1 | 22    | 0.031   | 1    | U   | K.VYVPALIFGQLLTSSNYDDEK.V            |
| 10824 | 156 - 178   | 872.4465  | 2614.3177 | 2614.3166 | 0.40    | 1 | 44    | 0.0024  | 1    | U   | K.VYVPALIFGQLLTSSNYDDEK.V            |
| 10826 | 156 - 178   | 1308.1666 | 2614.3185 | 2614.3166 | 0.73    | 1 | 64    | 3.8e-05 | 1    | U   | K.VYVPALIFGQLLTSSNYDDEK.V            |
| 1393  | 190 - 197   | 491.7548  | 981.4950  | 981.4953  | -0.36   | 0 | 39    | 0.0011  | 1    | ... | K.LCNIFSTK.F                         |
| 1201  | 198 - 205   | 478.2315  | 954.4484  | 954.4481  | 0.35    | 0 | 26    | 0.016   | 1    | ... | U.K.FTVETACK.E                       |
| 3118  | 213 - 221   | 600.2537  | 1198.4929 | 1198.4933 | -0.33   | 0 | 28    | 0.012   | 1    | ... | U.K.QTWMNNMMK.T<br>+ Oxidation (M)   |
| 3120  | 213 - 221   | 600.2541  | 1198.4937 | 1198.4933 | 0.32    | 0 | 27    | 0.028   | 1    | ... | U.K.QTWMNNMMK.T<br>+ Oxidation (M)   |
| 3121  | 213 - 221   | 600.2543  | 1198.4940 | 1198.4933 | 0.61    | 0 | 32    | 0.008   | 1    | ... | U.K.QTWMNNMMK.T<br>+ Oxidation (M)   |
| 3122  | 213 - 221   | 600.2544  | 1198.4943 | 1198.4933 | 0.82    | 0 | 32    | 0.008   | 1    | ... | U.K.QTWMNNMMK.T<br>+ Oxidation (M)   |
| 3221  | 213 - 221   | 608.2513  | 1214.4881 | 1214.4882 | -0.092  | 0 | 20    | 0.049   | 1    | ... | U.K.QTWMNNMMK.T<br>+ 2 Oxidation (M) |
| 3222  | 213 - 221   | 608.2515  | 1214.4884 | 1214.4882 | 0.15    | 0 | 18    | 0.024   | 1    | ... | U.K.QTWMNNMMK.T<br>+ 2 Oxidation (M) |
| 3223  | 213 - 221   | 608.2515  | 1214.4884 | 1214.4882 | 0.15    | 0 | 31    | 0.0086  | 1    | ... | U.K.QTWMNNMMK.T<br>+ 2 Oxidation (M) |
| 3224  | 213 - 221   | 608.2517  | 1214.4888 | 1214.4882 | 0.45    | 0 | 16    | 0.047   | 1    | ... | U.K.QTWMNNMMK.T<br>+ 2 Oxidation (M) |
| 3225  | 213 - 221   | 608.2517  | 1214.4888 | 1214.4882 | 0.48    | 0 | 27    | 0.026   | 1    | ... | U.K.QTWMNNMMK.T<br>+ 2 Oxidation (M) |
| 3226  | 213 - 221   | 608.2525  | 1214.4905 | 1214.4882 | 1.85    | 0 | 30    | 0.014   | 1    | ... | U.K.QTWMNNMMK.T<br>+ 2 Oxidation (M) |
| 10285 | 227 - 246   | 805.3812  | 2413.1218 | 2413.1260 | -1.75   | 1 | 55    | 6.9e-05 | 1    | U   | K.IKHFDGEDYTCITFPDLSK.F              |
| 10286 | 227 - 246   | 805.3821  | 2413.1245 | 2413.1260 | -0.62   | 1 | 45    | 0.00038 | 1    | U   | K.IKHFDGEDYTCITFPDLSK.F              |
| 9649  | 229 - 246   | 724.9902  | 2171.9488 | 2171.9470 | 0.84    | 0 | 40    | 0.00089 | 1    | ... | U.K.HFDGEDYTCITFPDLSK.F              |
| 3750  | 252 - 262   | 637.8599  | 1273.7052 | 1273.7064 | -0.94   | 1 | 34    | 0.0034  | 1    | ... | U.K.LDKDIVALMTR.R                    |
| 3751  | 252 - 262   | 637.8599  | 1273.7053 | 1273.7064 | -0.87   | 1 | 36    | 0.0011  | 1    | ... | U.K.LDKDIVALMTR.R                    |
| 3755  | 252 - 262   | 637.8603  | 1273.7060 | 1273.7064 | -0.33   | 1 | 42    | 0.00078 | 1    | ... | U.K.LDKDIVALMTR.R                    |
| 3758  | 252 - 262   | 637.8604  | 1273.7063 | 1273.7064 | -0.033  | 1 | 37    | 0.0015  | 1    | ... | U.K.LDKDIVALMTR.R                    |
| 3760  | 252 - 262   | 637.8606  | 1273.7065 | 1273.7064 | 0.12    | 1 | 20    | 0.041   | 1    | ... | U.K.LDKDIVALMTR.R                    |
| 3761  | 252 - 262   | 637.8606  | 1273.7066 | 1273.7064 | 0.16    | 1 | 77    | 7.3e-07 | 1    | ... | U.K.LDKDIVALMTR.R                    |
| 3762  | 252 - 262   | 637.8606  | 1273.7066 | 1273.7064 | 0.16    | 1 | 21    | 0.018   | 1    | ... | U.K.LDKDIVALMTR.R                    |
| 3763  | 252 - 262   | 637.8606  | 1273.7067 | 1273.7064 | 0.25    | 1 | 64    | 1.6e-05 | 1    | ... | U.K.LDKDIVALMTR.R                    |
| 3765  | 252 - 262   | 637.8607  | 1273.7069 | 1273.7064 | 0.41    | 1 | 49    | 0.00042 | 1    | ... | U.K.LDKDIVALMTR.R                    |
| 3766  | 252 - 262   | 425.5763  | 1273.7070 | 1273.7064 | 0.44    | 1 | 33    | 0.023   | 1    | ... | U.K.LDKDIVALMTR.R                    |
| 3881  | 252 - 262   | 430.9067  | 1289.6982 | 1289.7013 | -2.38   | 1 | 24    | 0.024   | 1    | ... | U.K.LDKDIVALMTR.R<br>+ Oxidation (M) |
| 3882  | 252 - 262   | 645.8573  | 1289.7000 | 1289.7013 | -1.01   | 1 | 55    | 8.3e-05 | 1    | ... | U.K.LDKDIVALMTR.R<br>+ Oxidation (M) |
| 3883  | 252 - 262   | 430.9073  | 1289.7002 | 1289.7013 | -0.87   | 1 | 23    | 0.017   | 1    | ... | U.K.LDKDIVALMTR.R<br>+ Oxidation (M) |
| 3884  | 252 - 262   | 645.8574  | 1289.7002 | 1289.7013 | -0.85   | 1 | 52    | 8.5e-05 | 1    | ... | U.K.LDKDIVALMTR.R                    |

| Query                | Start - End | Observed | Mr (expt) | Mr (calc) | ppm     | M | Score | Expect  | Rank | U | Peptide                            |
|----------------------|-------------|----------|-----------|-----------|---------|---|-------|---------|------|---|------------------------------------|
|                      |             |          |           |           |         |   |       |         |      |   | + Oxidation (M)                    |
| <a href="#">3885</a> | 252 - 262   | 645.8577 | 1289.7008 | 1289.7013 | -0.40   | 1 | 34    | 0.0022  | 1    | U | K.LDKDIVALMTR.R<br>+ Oxidation (M) |
| <a href="#">3886</a> | 252 - 262   | 645.8577 | 1289.7008 | 1289.7013 | -0.37   | 1 | 31    | 0.0039  | 1    | U | K.LDKDIVALMTR.R<br>+ Oxidation (M) |
| <a href="#">3887</a> | 252 - 262   | 430.9076 | 1289.7009 | 1289.7013 | -0.33   | 1 | 27    | 0.023   | 1    | U | K.LDKDIVALMTR.R<br>+ Oxidation (M) |
| <a href="#">3889</a> | 252 - 262   | 645.8578 | 1289.7010 | 1289.7013 | -0.20   | 1 | 50    | 6.2e-05 | 1    | U | K.LDKDIVALMTR.R<br>+ Oxidation (M) |
| <a href="#">3890</a> | 252 - 262   | 430.9076 | 1289.7011 | 1289.7013 | -0.19   | 1 | 32    | 0.0043  | 1    | U | K.LDKDIVALMTR.R<br>+ Oxidation (M) |
| <a href="#">3891</a> | 252 - 262   | 645.8579 | 1289.7012 | 1289.7013 | -0.047  | 1 | 57    | 1.9e-05 | 1    | U | K.LDKDIVALMTR.R<br>+ Oxidation (M) |
| <a href="#">3892</a> | 252 - 262   | 430.9077 | 1289.7013 | 1289.7013 | -0.0054 | 1 | 33    | 0.022   | 1    | U | K.LDKDIVALMTR.R<br>+ Oxidation (M) |
| <a href="#">3894</a> | 252 - 262   | 645.8581 | 1289.7017 | 1289.7013 | 0.29    | 1 | 50    | 6.3e-05 | 1    | U | K.LDKDIVALMTR.R<br>+ Oxidation (M) |
| <a href="#">3895</a> | 252 - 262   | 645.8581 | 1289.7017 | 1289.7013 | 0.31    | 1 | 62    | 5.2e-06 | 1    | U | K.LDKDIVALMTR.R<br>+ Oxidation (M) |
| <a href="#">3896</a> | 252 - 262   | 430.9079 | 1289.7018 | 1289.7013 | 0.39    | 1 | 30    | 0.0084  | 1    | U | K.LDKDIVALMTR.R<br>+ Oxidation (M) |
| <a href="#">975</a>  | 255 - 262   | 459.7573 | 917.5000  | 917.5004  | -0.50   | 0 | 49    | 0.00031 | 1    | U | K.DIVALMTR.R                       |
| <a href="#">1083</a> | 255 - 262   | 467.7549 | 933.4953  | 933.4953  | -0.062  | 0 | 40    | 0.006   | 1    | U | K.DIVALMTR.R<br>+ Oxidation (M)    |
| <a href="#">1084</a> | 255 - 262   | 467.7549 | 933.4953  | 933.4953  | -0.019  | 0 | 35    | 0.018   | 1    | U | K.DIVALMTR.R<br>+ Oxidation (M)    |
| <a href="#">1604</a> | 264 - 272   | 506.7295 | 1011.4444 | 1011.4444 | 0.061   | 0 | 43    | 0.0014  | 1    | U | R.AYDLAGSCR.G                      |
| <a href="#">1410</a> | 290 - 297   | 493.7634 | 985.5123  | 985.5120  | 0.27    | 0 | 30    | 0.0082  | 1    | U | R.SYVDLYVK.D                       |
| <a href="#">1412</a> | 290 - 297   | 493.7636 | 985.5125  | 985.5120  | 0.52    | 0 | 43    | 0.00079 | 1    | U | R.SYVDLYVK.D                       |
| <a href="#">3045</a> | 298 - 308   | 396.8870 | 1187.6392 | 1187.6398 | -0.47   | 1 | 30    | 0.033   | 1    | U | K.DKLDVETGVALK.V                   |
| <a href="#">3048</a> | 298 - 308   | 594.8270 | 1187.6394 | 1187.6398 | -0.29   | 1 | 50    | 0.00036 | 1    | U | K.DKLDVETGVALK.V                   |
| <a href="#">3049</a> | 298 - 308   | 594.8270 | 1187.6394 | 1187.6398 | -0.29   | 1 | 22    | 0.046   | 1    | U | K.DKLDVETGVALK.V                   |
| <a href="#">1149</a> | 300 - 308   | 473.2665 | 944.5184  | 944.5179  | 0.59    | 0 | 50    | 0.00058 | 1    | U | K.LDETGVALK.V                      |
| <a href="#">2131</a> | 309 - 317   | 540.7921 | 1079.5696 | 1079.5723 | -2.48   | 0 | 30    | 0.032   | 1    | U | K.VIHELANER.W                      |
| <a href="#">2134</a> | 309 - 317   | 360.8642 | 1079.5709 | 1079.5723 | -1.33   | 0 | 25    | 0.011   | 1    | U | K.VIHELANER.W                      |
| <a href="#">2139</a> | 309 - 317   | 360.8646 | 1079.5720 | 1079.5723 | -0.30   | 0 | 31    | 0.029   | 1    | U | K.VIHELANER.W                      |
| <a href="#">2140</a> | 309 - 317   | 540.7933 | 1079.5720 | 1079.5723 | -0.26   | 0 | 35    | 0.013   | 1    | U | K.VIHELANER.W                      |
| <a href="#">2141</a> | 309 - 317   | 360.8646 | 1079.5721 | 1079.5723 | -0.22   | 0 | 19    | 0.048   | 1    | U | K.VIHELANER.W                      |
| <a href="#">2142</a> | 309 - 317   | 360.8647 | 1079.5723 | 1079.5723 | -0.023  | 0 | 33    | 0.012   | 1    | U | K.VIHELANER.W                      |
| <a href="#">2144</a> | 309 - 317   | 540.7935 | 1079.5724 | 1079.5723 | 0.094   | 0 | 45    | 0.0012  | 1    | U | K.VIHELANER.W                      |
| <a href="#">2146</a> | 309 - 317   | 540.7935 | 1079.5725 | 1079.5723 | 0.15    | 0 | 57    | 6.6e-05 | 1    | U | K.VIHELANER.W                      |
| <a href="#">2147</a> | 309 - 317   | 540.7936 | 1079.5727 | 1079.5723 | 0.32    | 0 | 39    | 0.0056  | 1    | U | K.VIHELANER.W                      |
| <a href="#">2148</a> | 309 - 317   | 360.8648 | 1079.5727 | 1079.5723 | 0.34    | 0 | 32    | 0.015   | 1    | U | K.VIHELANER.W                      |
| <a href="#">3542</a> | 318 - 327   | 625.8076 | 1249.6006 | 1249.6013 | -0.52   | 0 | 44    | 0.00033 | 1    | U | R.WDVCLTLSEK.G                     |
| <a href="#">6756</a> | 328 - 342   | 547.6252 | 1639.8539 | 1639.8570 | -1.90   | 0 | 21    | 0.018   | 1    | U | K.GFQQISFVNSIATTK.G                |
| <a href="#">6758</a> | 328 - 342   | 820.9352 | 1639.8559 | 1639.8570 | -0.68   | 0 | 46    | 0.00016 | 1    | U | K.GFQQISFVNSIATTK.G                |
| <a href="#">6759</a> | 328 - 342   | 820.9354 | 1639.8562 | 1639.8570 | -0.49   | 0 | 23    | 0.037   | 1    | U | K.GFQQISFVNSIATTK.G                |
| <a href="#">6760</a> | 328 - 342   | 547.6260 | 1639.8562 | 1639.8570 | -0.46   | 0 | 26    | 0.0059  | 1    | U | K.GFQQISFVNSIATTK.G                |
| <a href="#">6761</a> | 328 - 342   | 820.9355 | 1639.8564 | 1639.8570 | -0.36   | 0 | 44    | 0.0012  | 1    | U | K.GFQQISFVNSIATTK.G                |
| <a href="#">6762</a> | 328 - 342   | 547.6262 | 1639.8567 | 1639.8570 | -0.20   | 0 | 49    | 5.5e-05 | 1    | U | K.GFQQISFVNSIATTK.G                |
| <a href="#">6763</a> | 328 - 342   | 820.9356 | 1639.8567 | 1639.8570 | -0.17   | 0 | 57    | 4.2e-05 | 1    | U | K.GFQQISFVNSIATTK.G                |
| <a href="#">6764</a> | 328 - 342   | 820.9356 | 1639.8567 | 1639.8570 | -0.15   | 0 | 48    | 0.00045 | 1    | U | K.GFQQISFVNSIATTK.G                |
| <a href="#">6765</a> | 328 - 342   | 820.9357 | 1639.8568 | 1639.8570 | -0.12   | 0 | 71    | 6.4e-06 | 1    | U | K.GFQQISFVNSIATTK.G                |
| <a href="#">6766</a> | 328 - 342   | 820.9357 | 1639.8568 | 1639.8570 | -0.092  | 0 | 69    | 1e-05   | 1    | U | K.GFQQISFVNSIATTK.G                |
| <a href="#">6767</a> | 328 - 342   | 820.9357 | 1639.8569 | 1639.8570 | -0.055  | 0 | 54    | 2.7e-05 | 1    | U | K.GFQQISFVNSIATTK.G                |
| <a href="#">6768</a> | 328 - 342   | 820.9358 | 1639.8570 | 1639.8570 | -0.0067 | 0 | 81    | 5.6e-07 | 1    | U | K.GFQQISFVNSIATTK.G                |
| <a href="#">6769</a> | 328 - 342   | 820.9358 | 1639.8570 | 1639.8570 | 0.018   | 0 | 35    | 0.027   | 1    | U | K.GFQQISFVNSIATTK.G                |
| <a href="#">6770</a> | 328 - 342   | 547.6263 | 1639.8570 | 1639.8570 | 0.038   | 0 | 37    | 0.0029  | 1    | U | K.GFQQISFVNSIATTK.G                |
| <a href="#">6771</a> | 328 - 342   | 820.9358 | 1639.8570 | 1639.8570 | 0.042   | 0 | 27    | 0.017   | 1    | U | K.GFQQISFVNSIATTK.G                |
| <a href="#">6772</a> | 328 - 342   | 547.6263 | 1639.8571 | 1639.8570 | 0.057   | 0 | 56    | 2.6e-05 | 1    | U | K.GFQQISFVNSIATTK.G                |
| <a href="#">6774</a> | 328 - 342   | 820.9358 | 1639.8571 | 1639.8570 | 0.10    | 0 | 55    | 0.0002  | 1    | U | K.GFQQISFVNSIATTK.G                |
| <a href="#">6775</a> | 328 - 342   | 820.9359 | 1639.8572 | 1639.8570 | 0.13    | 0 | 43    | 0.00048 | 1    | U | K.GFQQISFVNSIATTK.G                |
| <a href="#">6776</a> | 328 - 342   | 820.9359 | 1639.8572 | 1639.8570 | 0.16    | 0 | 76    | 1.3e-06 | 1    | U | K.GFQQISFVNSIATTK.G                |
| <a href="#">6777</a> | 328 - 342   | 820.9360 | 1639.8573 | 1639.8570 | 0.23    | 0 | 34    | 0.0018  | 1    | U | K.GFQQISFVNSIATTK.G                |
| <a href="#">6778</a> | 328 - 342   | 820.9360 | 1639.8574 | 1639.8570 | 0.29    | 0 | 37    | 0.0036  | 1    | U | K.GFQQISFVNSIATTK.G                |
| <a href="#">6779</a> | 328 - 342   | 820.9361 | 1639.8576 | 1639.8570 | 0.40    | 0 | 45    | 0.0002  | 1    | U | K.GFQQISFVNSIATTK.G                |
| <a href="#">6780</a> | 328 - 342   | 820.9361 | 1639.8577 | 1639.8570 | 0.46    | 0 | 33    | 0.0025  | 1    | U | K.GFQQISFVNSIATTK.G                |
| <a href="#">6781</a> | 328 - 342   | 547.6266 | 1639.8579 | 1639.8570 | 0.53    | 0 | 26    | 0.011   | 1    | U | K.GFQQISFVNSIATTK.G                |
| <a href="#">6783</a> | 328 - 342   | 820.9363 | 1639.8580 | 1639.8570 | 0.60    | 0 | 59    | 3.3e-05 | 1    | U | K.GFQQISFVNSIATTK.G                |
| <a href="#">6787</a> | 328 - 342   | 820.9368 | 1639.8590 | 1639.8570 | 1.24    | 0 | 17    | 0.027   | 1    | U | K.GFQQISFVNSIATTK.G                |
| <a href="#">6788</a> | 328 - 342   | 820.9368 | 1639.8591 | 1639.8570 | 1.30    | 0 | 54    | 6.6e-05 | 1    | U | K.GFQQISFVNSIATTK.G                |
| <a href="#">6789</a> | 328 - 342   | 820.9368 | 1639.8591 | 1639.8570 | 1.32    | 0 | 32    | 0.011   | 1    | U | K.GFQQISFVNSIATTK.G                |
| <a href="#">6790</a> | 328 - 342   | 820.9369 | 1639.8592 | 1639.8570 | 1.33    | 0 | 22    | 0.041   | 1    | U | K.GFQQISFVNSIATTK.G                |
| <a href="#">4374</a> | 346 - 357   | 453.2416 | 1356.7030 | 1356.7038 | -0.56   | 0 | 44    | 0.0029  | 1    | U | R.HVDYVVDQVVGK.L                   |
| <a href="#">4375</a> | 346 - 357   | 679.3588 | 1356.7031 | 1356.7038 | -0.52   | 0 | 57    | 4.7e-06 | 1    | U | R.HVDYVVDQVVGK.L                   |
| <a href="#">4376</a> | 346 - 357   | 679.3589 | 1356.7032 | 1356.7038 | -0.46   | 0 | 79    | 9.7e-08 | 1    | U | R.HVDYVVDQVVGK.L                   |
| <a href="#">4378</a> | 346 - 357   | 679.3590 | 1356.7034 | 1356.7038 | -0.29   | 0 | 74    | 7.1e-07 | 1    | U | R.HVDYVVDQVVGK.L                   |
| <a href="#">4380</a> | 346 - 357   | 679.3590 | 1356.7035 | 1356.7038 | -0.21   | 0 | 58    | 9.6e-06 | 1    | U | R.HVDYVVDQVVGK.L                   |
| <a href="#">4381</a> | 346 - 357   | 679.3591 | 1356.7036 | 1356.7038 | -0.12   | 0 | 49    | 0.00017 | 1    | U | R.HVDYVVDQVVGK.L                   |
| <a href="#">4382</a> | 346 - 357   | 679.3591 | 1356.7037 | 1356.7038 | -0.050  | 0 | 81    | 9.8e-08 | 1    | U | R.HVDYVVDQVVGK.L                   |
| <a href="#">4383</a> | 346 - 357   | 679.3592 | 1356.7038 | 1356.7038 | -0.021  | 0 | 58    | 2.3e-05 | 1    | U | R.HVDYVVDQVVGK.L                   |
| <a href="#">4384</a> | 346 - 357   | 679.3592 | 1356.7038 | 1356.7038 | -0.0059 | 0 | 44    | 0.00022 | 1    | U | R.HVDYVVDQVVGK.L                   |
| <a href="#">4385</a> | 346 - 357   | 679.3592 | 1356.7038 | 1356.7038 | 0.024   | 0 | 39    | 0.00065 | 1    | U | R.HVDYVVDQVVGK.L                   |
| <a href="#">4386</a> | 346 - 357   | 679.3592 | 1356.7038 | 1356.7038 | 0.038   | 0 | 63    | 2.1e-06 | 1    | U | R.HVDYVVDQVVGK.L                   |
| <a href="#">4387</a> | 346 - 357   | 453.2419 | 1356.7039 | 1356.7038 | 0.078   | 0 | 24    | 0.038   | 1    | U | R.HVDYVVDQVVGK.L                   |
| <a href="#">4388</a> | 346 - 357   | 679.3592 | 1356.7039 | 1356.7038 | 0.083   | 0 | 57    | 1.6e-05 | 1    | U | R.HVDYVVDQVVGK.L                   |
| <a href="#">4389</a> | 346 - 357   | 679.3593 | 1356.7040 | 1356.7038 | 0.14    | 0 | 81    | 1.7e-07 | 1    | U | R.HVDYVVDQVVGK.L                   |
| <a href="#">4390</a> | 346 - 357   | 679.3594 | 1356.7043 | 1356.7038 | 0.36    | 0 | 56    | 1.3e-05 | 1    | U | R.HVDYVVDQVVGK.L                   |
| <a href="#">4391</a> | 346 - 357   | 679.3595 | 1356.7044 | 1356.7038 | 0.44    | 0 | 58    | 1.5e-05 | 1    | U | R.HVDYVVDQVVGK.L                   |
| <a href="#">4392</a> | 346 - 357   | 679.3595 | 1356.7045 | 1356.7038 | 0.54    | 0 | 52    | 3.7e-05 | 1    | U | R.HVDYVVDQVVGK.L                   |

| Query                 | Start - End | Observed | Mr (expt) | Mr (calc) | ppm    | M | Score | Expect  | Rank | U | Peptide                                |
|-----------------------|-------------|----------|-----------|-----------|--------|---|-------|---------|------|---|----------------------------------------|
| <a href="#">4394</a>  | 346 - 357   | 679.3597 | 1356.7048 | 1356.7038 | 0.78   | 0 | 39    | 0.0012  | 1    | U | R.HVDYVVDQVVGK.L                       |
| <a href="#">516</a>   | 358 - 364   | 414.7813 | 827.5480  | 827.5480  | -0.062 | 1 | 28    | 0.012   | 1    | U | K.LIEVVK.K                             |
| <a href="#">2849</a>  | 368 - 378   | 580.3449 | 1158.6752 | 1158.6761 | -0.81  | 0 | 39    | 0.0017  | 1    | U | K.AGVSVKPFQVK.N                        |
| <a href="#">2850</a>  | 368 - 378   | 387.2325 | 1158.6756 | 1158.6761 | -0.45  | 0 | 37    | 0.0046  | 1    | U | K.AGVSVKPFQVK.N                        |
| <a href="#">2851</a>  | 368 - 378   | 580.3451 | 1158.6757 | 1158.6761 | -0.34  | 0 | 30    | 0.0089  | 1    | U | K.AGVSVKPFQVK.N                        |
| <a href="#">2852</a>  | 368 - 378   | 580.3452 | 1158.6758 | 1158.6761 | -0.29  | 0 | 48    | 0.00038 | 1    | U | K.AGVSVKPFQVK.N                        |
| <a href="#">2862</a>  | 368 - 378   | 580.3464 | 1158.6782 | 1158.6761 | 1.80   | 0 | 39    | 0.0027  | 1    | U | K.AGVSVKPFQVK.N                        |
| <a href="#">10737</a> | 379 - 399   | 859.4251 | 2575.2535 | 2575.2529 | 0.22   | 0 | 39    | 0.0041  | 1    | U | K.NHIWVFINLIENPTFDSQTK.E               |
| <a href="#">397</a>   | 440 - 446   | 401.7245 | 801.4344  | 801.4344  | 0      | 0 | 37    | 0.0092  | 1    | U | K.AQTQLNK.K                            |
| <a href="#">1054</a>  | 440 - 447   | 465.7720 | 929.5295  | 929.5294  | 0.11   | 1 | 27    | 0.025   | 1    | U | K.AQTQLNKK.C                           |
| <a href="#">1341</a>  | 462 - 471   | 488.2222 | 974.4297  | 974.4305  | -0.77  | 0 | 54    | 0.00017 | 1    | U | K.LDDANDAGGK.H                         |
| <a href="#">1343</a>  | 462 - 471   | 488.2225 | 974.4305  | 974.4305  | 0.012  | 0 | 49    | 0.00054 | 1    | U | K.LDDANDAGGK.H                         |
| <a href="#">7763</a>  | 472 - 487   | 887.4382 | 1772.8619 | 1772.8614 | 0.27   | 0 | 93    | 1.5e-08 | 1    | U | K.HSLECTLILTEGDSAK.S                   |
| <a href="#">2549</a>  | 488 - 499   | 564.8392 | 1127.6638 | 1127.6663 | -2.19  | 0 | 69    | 4.1e-06 | 1    | U | K.SLAVSGLGVIGR.D                       |
| <a href="#">2550</a>  | 488 - 499   | 564.8397 | 1127.6648 | 1127.6663 | -1.25  | 0 | 50    | 4.7e-05 | 1    | U | K.SLAVSGLGVIGR.D                       |
| <a href="#">2551</a>  | 488 - 499   | 564.8401 | 1127.6656 | 1127.6663 | -0.61  | 0 | 42    | 0.00032 | 1    | U | K.SLAVSGLGVIGR.D                       |
| <a href="#">2552</a>  | 488 - 499   | 564.8401 | 1127.6656 | 1127.6663 | -0.60  | 0 | 48    | 0.00063 | 1    | U | K.SLAVSGLGVIGR.D                       |
| <a href="#">2554</a>  | 488 - 499   | 564.8402 | 1127.6658 | 1127.6663 | -0.38  | 0 | 39    | 0.0016  | 1    | U | K.SLAVSGLGVIGR.D                       |
| <a href="#">2555</a>  | 488 - 499   | 564.8403 | 1127.6660 | 1127.6663 | -0.26  | 0 | 35    | 0.004   | 1    | U | K.SLAVSGLGVIGR.D                       |
| <a href="#">2556</a>  | 488 - 499   | 564.8403 | 1127.6660 | 1127.6663 | -0.19  | 0 | 67    | 3e-06   | 1    | U | K.SLAVSGLGVIGR.D                       |
| <a href="#">2557</a>  | 488 - 499   | 564.8404 | 1127.6662 | 1127.6663 | -0.064 | 0 | 45    | 0.00021 | 1    | U | K.SLAVSGLGVIGR.D                       |
| <a href="#">2558</a>  | 488 - 499   | 564.8404 | 1127.6663 | 1127.6663 | 0.0071 | 0 | 38    | 0.00096 | 1    | U | K.SLAVSGLGVIGR.D                       |
| <a href="#">2559</a>  | 488 - 499   | 564.8406 | 1127.6665 | 1127.6663 | 0.26   | 0 | 49    | 6.9e-05 | 1    | U | K.SLAVSGLGVIGR.D                       |
| <a href="#">2560</a>  | 488 - 499   | 376.8962 | 1127.6669 | 1127.6663 | 0.53   | 0 | 36    | 0.0094  | 1    | U | K.SLAVSGLGVIGR.D                       |
| <a href="#">2561</a>  | 488 - 499   | 564.8407 | 1127.6669 | 1127.6663 | 0.56   | 0 | 48    | 5.1e-05 | 1    | U | K.SLAVSGLGVIGR.D                       |
| <a href="#">2562</a>  | 488 - 499   | 564.8408 | 1127.6670 | 1127.6663 | 0.65   | 0 | 52    | 5.7e-05 | 1    | U | K.SLAVSGLGVIGR.D                       |
| <a href="#">2563</a>  | 488 - 499   | 564.8408 | 1127.6671 | 1127.6663 | 0.79   | 0 | 74    | 6.5e-07 | 1    | U | K.SLAVSGLGVIGR.D                       |
| <a href="#">2564</a>  | 488 - 499   | 564.8409 | 1127.6673 | 1127.6663 | 0.91   | 0 | 53    | 9.6e-05 | 1    | U | K.SLAVSGLGVIGR.D                       |
| <a href="#">2565</a>  | 488 - 499   | 564.8413 | 1127.6681 | 1127.6663 | 1.62   | 0 | 48    | 7.9e-05 | 1    | U | K.SLAVSGLGVIGR.D                       |
| <a href="#">2566</a>  | 488 - 499   | 564.8416 | 1127.6686 | 1127.6663 | 2.12   | 0 | 61    | 6.2e-06 | 1    | U | K.SLAVSGLGVIGR.D                       |
| <a href="#">623</a>   | 502 - 508   | 426.2422 | 850.4699  | 850.4701  | -0.25  | 0 | 29    | 0.021   | 1    | R | YGVFPLR.G                              |
| <a href="#">624</a>   | 502 - 508   | 426.2423 | 850.4701  | 850.4701  | -0.018 | 0 | 28    | 0.028   | 1    | R | YGVFPLR.G                              |
| <a href="#">5875</a>  | 521 - 533   | 765.4037 | 1528.7929 | 1528.7919 | 0.68   | 0 | 96    | 1.8e-08 | 1    | K | QIMENAEINNIK.I                         |
| <a href="#">5877</a>  | 521 - 533   | 765.4059 | 1528.7973 | 1528.7919 | 3.56   | 0 | 61    | 6.7e-05 | 1    | K | QIMENAEINNIK.I                         |
| <a href="#">6052</a>  | 521 - 533   | 773.4001 | 1544.7857 | 1544.7868 | -0.70  | 0 | 41    | 0.0012  | 1    | K | QIMENAEINNIK.I<br>+ Oxidation (M)      |
| <a href="#">6053</a>  | 521 - 533   | 773.4005 | 1544.7864 | 1544.7868 | -0.26  | 0 | 62    | 3.4e-05 | 1    | K | QIMENAEINNIK.I<br>+ Oxidation (M)      |
| <a href="#">6054</a>  | 521 - 533   | 773.4005 | 1544.7864 | 1544.7868 | -0.23  | 0 | 61    | 1.6e-05 | 1    | K | QIMENAEINNIK.I<br>+ Oxidation (M)      |
| <a href="#">6055</a>  | 521 - 533   | 773.4006 | 1544.7866 | 1544.7868 | -0.10  | 0 | 75    | 1.7e-06 | 1    | K | QIMENAEINNIK.I<br>+ Oxidation (M)      |
| <a href="#">6056</a>  | 521 - 533   | 773.4007 | 1544.7868 | 1544.7868 | -0.014 | 0 | 63    | 4.7e-05 | 1    | K | QIMENAEINNIK.I<br>+ Oxidation (M)      |
| <a href="#">469</a>   | 534 - 540   | 410.7501 | 819.4856  | 819.4854  | 0.17   | 0 | 23    | 0.015   | 1    | K | IVGLQYK.K                              |
| <a href="#">473</a>   | 534 - 540   | 410.7505 | 819.4864  | 819.4854  | 1.24   | 0 | 32    | 0.0051  | 1    | K | IVGLQYK.K                              |
| <a href="#">2814</a>  | 541 - 550   | 578.2802 | 1154.5458 | 1154.5455 | 0.28   | 1 | 34    | 0.0028  | 1    | U | K.KSYDDAESLK.T                         |
| <a href="#">1714</a>  | 542 - 550   | 514.2324 | 1026.4502 | 1026.4505 | -0.33  | 0 | 46    | 9.1e-05 | 1    | U | K.SYDDAESLK.T                          |
| <a href="#">1716</a>  | 542 - 550   | 514.2327 | 1026.4509 | 1026.4505 | 0.31   | 0 | 22    | 0.015   | 1    | U | K.SYDDAESLK.T                          |
| <a href="#">1717</a>  | 542 - 550   | 514.2328 | 1026.4509 | 1026.4505 | 0.39   | 0 | 26    | 0.0081  | 1    | U | K.SYDDAESLK.T                          |
| <a href="#">7465</a>  | 557 - 571   | 866.4060 | 1730.7975 | 1730.7968 | 0.46   | 0 | 52    | 4.9e-05 | 1    | K | IMIMTDQDQDGSNIK.G                      |
| <a href="#">7467</a>  | 557 - 571   | 577.9400 | 1730.7980 | 1730.7968 | 0.73   | 0 | 21    | 0.043   | 1    | K | IMIMTDQDQDGSNIK.G                      |
| <a href="#">7468</a>  | 557 - 571   | 866.4064 | 1730.7983 | 1730.7968 | 0.92   | 0 | 69    | 6e-06   | 1    | K | IMIMTDQDQDGSNIK.G                      |
| <a href="#">7565</a>  | 557 - 571   | 583.2705 | 1746.7897 | 1746.7917 | -1.13  | 0 | 32    | 0.0025  | 1    | K | IMIMTDQDQDGSNIK.G<br>+ Oxidation (M)   |
| <a href="#">7566</a>  | 557 - 571   | 874.4028 | 1746.7910 | 1746.7917 | -0.40  | 0 | 77    | 1.1e-06 | 1    | K | IMIMTDQDQDGSNIK.G<br>+ Oxidation (M)   |
| <a href="#">7567</a>  | 557 - 571   | 874.4028 | 1746.7910 | 1746.7917 | -0.38  | 0 | 68    | 1.6e-05 | 1    | K | IMIMTDQDQDGSNIK.G<br>+ Oxidation (M)   |
| <a href="#">7568</a>  | 557 - 571   | 874.4028 | 1746.7910 | 1746.7917 | -0.38  | 0 | 64    | 4.3e-05 | 1    | K | IMIMTDQDQDGSNIK.G<br>+ Oxidation (M)   |
| <a href="#">7571</a>  | 557 - 571   | 583.2712 | 1746.7917 | 1746.7917 | -0.011 | 0 | 38    | 0.0059  | 1    | K | IMIMTDQDQDGSNIK.G<br>+ Oxidation (M)   |
| <a href="#">7572</a>  | 557 - 571   | 583.2712 | 1746.7919 | 1746.7917 | 0.14   | 0 | 26    | 0.012   | 1    | K | IMIMTDQDQDGSNIK.G<br>+ Oxidation (M)   |
| <a href="#">7573</a>  | 557 - 571   | 583.2713 | 1746.7921 | 1746.7917 | 0.25   | 0 | 42    | 0.0066  | 1    | K | IMIMTDQDQDGSNIK.G<br>+ Oxidation (M)   |
| <a href="#">7574</a>  | 557 - 571   | 583.2713 | 1746.7921 | 1746.7917 | 0.26   | 0 | 28    | 0.011   | 1    | K | IMIMTDQDQDGSNIK.G<br>+ Oxidation (M)   |
| <a href="#">7575</a>  | 557 - 571   | 874.4034 | 1746.7921 | 1746.7917 | 0.27   | 0 | 67    | 2.3e-05 | 1    | K | IMIMTDQDQDGSNIK.G<br>+ Oxidation (M)   |
| <a href="#">7576</a>  | 557 - 571   | 874.4034 | 1746.7922 | 1746.7917 | 0.28   | 0 | 71    | 1e-06   | 1    | K | IMIMTDQDQDGSNIK.G<br>+ Oxidation (M)   |
| <a href="#">7578</a>  | 557 - 571   | 583.2714 | 1746.7924 | 1746.7917 | 0.44   | 0 | 48    | 0.00081 | 1    | K | IMIMTDQDQDGSNIK.G<br>+ Oxidation (M)   |
| <a href="#">7579</a>  | 557 - 571   | 583.2717 | 1746.7934 | 1746.7917 | 0.98   | 0 | 45    | 0.0012  | 1    | K | IMIMTDQDQDGSNIK.G<br>+ Oxidation (M)   |
| <a href="#">7580</a>  | 557 - 571   | 583.2721 | 1746.7944 | 1746.7917 | 1.59   | 0 | 29    | 0.013   | 1    | K | IMIMTDQDQDGSNIK.G<br>+ Oxidation (M)   |
| <a href="#">7678</a>  | 557 - 571   | 882.3998 | 1762.7851 | 1762.7866 | -0.84  | 0 | 70    | 1.3e-05 | 1    | K | IMIMTDQDQDGSNIK.G<br>+ 2 Oxidation (M) |
| <a href="#">7679</a>  | 557 - 571   | 588.6025 | 1762.7856 | 1762.7866 | -0.54  | 0 | 54    | 0.00012 | 1    | K | IMIMTDQDQDGSNIK.G<br>+ 2 Oxidation (M) |
| <a href="#">7681</a>  | 557 - 571   | 588.6026 | 1762.7859 | 1762.7866 | -0.37  | 0 | 30    | 0.012   | 1    | K | IMIMTDQDQDGSNIK.G<br>+ 2 Oxidation (M) |
| <a href="#">7682</a>  | 557 - 571   | 588.6026 | 1762.7860 | 1762.7866 | -0.35  | 0 | 29    | 0.012   | 1    | K | IMIMTDQDQDGSNIK.G<br>+ 2 Oxidation (M) |
| <a href="#">7683</a>  | 557 - 571   | 588.6026 | 1762.7860 | 1762.7866 | -0.35  | 0 | 54    | 0.00044 | 1    | K | IMIMTDQDQDGSNIK.G<br>+ 2 Oxidation (M) |
| <a href="#">7685</a>  | 557 - 571   | 882.4003 | 1762.7860 | 1762.7866 | -0.31  | 0 | 66    | 1.2e-05 | 1    | K | IMIMTDQDQDGSNIK.G<br>+ 2 Oxidation (M) |

| Query                 | Start - End | Observed  | Mr (expt) | Mr (calc) | ppm    | M | Score | Expect  | Rank | U   | Peptide                                  |
|-----------------------|-------------|-----------|-----------|-----------|--------|---|-------|---------|------|-----|------------------------------------------|
| <a href="#">7686</a>  | 557 - 571   | 588.6026  | 1762.7861 | 1762.7866 | -0.28  | 0 | 39    | 0.0025  | 1    | ... | K.IMIMTDQDQDGSNIK.G<br>+ 2 Oxidation (M) |
| <a href="#">7687</a>  | 557 - 571   | 882.4004  | 1762.7861 | 1762.7866 | -0.25  | 0 | 56    | 0.0003  | 1    | ... | K.IMIMTDQDQDGSNIK.G<br>+ 2 Oxidation (M) |
| <a href="#">7688</a>  | 557 - 571   | 588.6027  | 1762.7864 | 1762.7866 | -0.13  | 0 | 62    | 7.5e-05 | 1    | ... | K.IMIMTDQDQDGSNIK.G<br>+ 2 Oxidation (M) |
| <a href="#">7689</a>  | 557 - 571   | 588.6028  | 1762.7867 | 1762.7866 | 0.040  | 0 | 41    | 0.0023  | 1    | ... | K.IMIMTDQDQDGSNIK.G<br>+ 2 Oxidation (M) |
| <a href="#">7690</a>  | 557 - 571   | 882.4007  | 1762.7869 | 1762.7866 | 0.19   | 0 | 55    | 0.00014 | 1    | ... | K.IMIMTDQDQDGSNIK.G<br>+ 2 Oxidation (M) |
| <a href="#">7691</a>  | 557 - 571   | 588.6030  | 1762.7871 | 1762.7866 | 0.26   | 0 | 48    | 0.00025 | 1    | ... | K.IMIMTDQDQDGSNIK.G<br>+ 2 Oxidation (M) |
| <a href="#">7693</a>  | 557 - 571   | 588.6031  | 1762.7874 | 1762.7866 | 0.45   | 0 | 37    | 0.0049  | 1    | ... | K.IMIMTDQDQDGSNIK.G<br>+ 2 Oxidation (M) |
| <a href="#">7694</a>  | 557 - 571   | 882.4010  | 1762.7874 | 1762.7866 | 0.47   | 0 | 64    | 4.7e-05 | 1    | ... | K.IMIMTDQDQDGSNIK.G<br>+ 2 Oxidation (M) |
| <a href="#">7695</a>  | 557 - 571   | 882.4010  | 1762.7875 | 1762.7866 | 0.54   | 0 | 40    | 0.00084 | 1    | ... | K.IMIMTDQDQDGSNIK.G<br>+ 2 Oxidation (M) |
| <a href="#">7696</a>  | 557 - 571   | 882.4011  | 1762.7876 | 1762.7866 | 0.60   | 0 | 72    | 7.8e-06 | 1    | ... | K.IMIMTDQDQDGSNIK.G<br>+ 2 Oxidation (M) |
| <a href="#">7697</a>  | 557 - 571   | 588.6032  | 1762.7878 | 1762.7866 | 0.69   | 0 | 41    | 0.002   | 1    | ... | K.IMIMTDQDQDGSNIK.G<br>+ 2 Oxidation (M) |
| <a href="#">7698</a>  | 557 - 571   | 882.4018  | 1762.7891 | 1762.7866 | 1.43   | 0 | 47    | 0.0016  | 1    | ... | K.IMIMTDQDQDGSNIK.G<br>+ 2 Oxidation (M) |
| <a href="#">7699</a>  | 557 - 571   | 882.4019  | 1762.7893 | 1762.7866 | 1.53   | 0 | 47    | 0.00071 | 1    | ... | K.IMIMTDQDQDGSNIK.G<br>+ 2 Oxidation (M) |
| <a href="#">8612</a>  | 572 - 587   | 951.5405  | 1901.0665 | 1901.0676 | -0.57  | 0 | 47    | 4e-05   | 1    | U   | K.GLLINFIHNNWPSLLK.H                     |
| <a href="#">8613</a>  | 572 - 587   | 634.6963  | 1901.0671 | 1901.0676 | -0.25  | 0 | 24    | 0.018   | 1    | U   | K.GLLINFIHNNWPSLLK.H                     |
| <a href="#">8615</a>  | 572 - 587   | 634.6965  | 1901.0678 | 1901.0676 | 0.13   | 0 | 31    | 0.0067  | 1    | U   | K.GLLINFIHNNWPSLLK.H                     |
| <a href="#">8618</a>  | 572 - 587   | 951.5415  | 1901.0685 | 1901.0676 | 0.51   | 0 | 57    | 5.2e-06 | 1    | U   | K.GLLINFIHNNWPSLLK.H                     |
| <a href="#">5878</a>  | 588 - 600   | 510.6159  | 1528.8259 | 1528.8290 | -2.02  | 0 | 40    | 0.0028  | 1    | U   | K.HGFLEEFITPIVK.A                        |
| <a href="#">5879</a>  | 588 - 600   | 765.4203  | 1528.8261 | 1528.8290 | -1.87  | 0 | 83    | 1.3e-07 | 1    | U   | K.HGFLEEFITPIVK.A                        |
| <a href="#">5880</a>  | 588 - 600   | 765.4213  | 1528.8280 | 1528.8290 | -0.60  | 0 | 63    | 5.8e-06 | 1    | U   | K.HGFLEEFITPIVK.A                        |
| <a href="#">5881</a>  | 588 - 600   | 510.6166  | 1528.8281 | 1528.8290 | -0.55  | 0 | 34    | 0.0026  | 1    | U   | K.HGFLEEFITPIVK.A                        |
| <a href="#">5882</a>  | 588 - 600   | 510.6166  | 1528.8281 | 1528.8290 | -0.55  | 0 | 33    | 0.0094  | 1    | U   | K.HGFLEEFITPIVK.A                        |
| <a href="#">5883</a>  | 588 - 600   | 765.4215  | 1528.8284 | 1528.8290 | -0.36  | 0 | 62    | 1.5e-06 | 1    | U   | K.HGFLEEFITPIVK.A                        |
| <a href="#">5884</a>  | 588 - 600   | 510.6168  | 1528.8284 | 1528.8290 | -0.35  | 0 | 36    | 0.0024  | 1    | U   | K.HGFLEEFITPIVK.A                        |
| <a href="#">5885</a>  | 588 - 600   | 765.4215  | 1528.8285 | 1528.8290 | -0.32  | 0 | 87    | 1.6e-08 | 1    | U   | K.HGFLEEFITPIVK.A                        |
| <a href="#">5887</a>  | 588 - 600   | 510.6168  | 1528.8286 | 1528.8290 | -0.24  | 0 | 34    | 0.0064  | 1    | U   | K.HGFLEEFITPIVK.A                        |
| <a href="#">5888</a>  | 588 - 600   | 765.4216  | 1528.8286 | 1528.8290 | -0.21  | 0 | 61    | 6.9e-06 | 1    | U   | K.HGFLEEFITPIVK.A                        |
| <a href="#">5889</a>  | 588 - 600   | 765.4216  | 1528.8287 | 1528.8290 | -0.15  | 0 | 69    | 5.5e-07 | 1    | U   | K.HGFLEEFITPIVK.A                        |
| <a href="#">5891</a>  | 588 - 600   | 765.4218  | 1528.8290 | 1528.8290 | 0.042  | 0 | 65    | 2.3e-06 | 1    | U   | K.HGFLEEFITPIVK.A                        |
| <a href="#">5892</a>  | 588 - 600   | 765.4218  | 1528.8291 | 1528.8290 | 0.11   | 0 | 66    | 1.7e-06 | 1    | U   | K.HGFLEEFITPIVK.A                        |
| <a href="#">5893</a>  | 588 - 600   | 510.6170  | 1528.8291 | 1528.8290 | 0.12   | 0 | 42    | 0.0011  | 1    | U   | K.HGFLEEFITPIVK.A                        |
| <a href="#">5894</a>  | 588 - 600   | 510.6170  | 1528.8292 | 1528.8290 | 0.14   | 0 | 48    | 0.00056 | 1    | U   | K.HGFLEEFITPIVK.A                        |
| <a href="#">5895</a>  | 588 - 600   | 510.6170  | 1528.8292 | 1528.8290 | 0.18   | 0 | 29    | 0.011   | 1    | U   | K.HGFLEEFITPIVK.A                        |
| <a href="#">5896</a>  | 588 - 600   | 510.6170  | 1528.8293 | 1528.8290 | 0.21   | 0 | 19    | 0.026   | 1    | U   | K.HGFLEEFITPIVK.A                        |
| <a href="#">5897</a>  | 588 - 600   | 765.4219  | 1528.8293 | 1528.8290 | 0.23   | 0 | 66    | 7.7e-06 | 1    | U   | K.HGFLEEFITPIVK.A                        |
| <a href="#">5899</a>  | 588 - 600   | 765.4219  | 1528.8293 | 1528.8290 | 0.24   | 0 | 45    | 6.1e-05 | 1    | U   | K.HGFLEEFITPIVK.A                        |
| <a href="#">5900</a>  | 588 - 600   | 765.4220  | 1528.8294 | 1528.8290 | 0.26   | 0 | 66    | 1.1e-06 | 1    | U   | K.HGFLEEFITPIVK.A                        |
| <a href="#">5901</a>  | 588 - 600   | 510.6171  | 1528.8295 | 1528.8290 | 0.33   | 0 | 49    | 0.00046 | 1    | U   | K.HGFLEEFITPIVK.A                        |
| <a href="#">5902</a>  | 588 - 600   | 765.4220  | 1528.8295 | 1528.8290 | 0.34   | 0 | 84    | 2.5e-08 | 1    | U   | K.HGFLEEFITPIVK.A                        |
| <a href="#">5903</a>  | 588 - 600   | 765.4221  | 1528.8296 | 1528.8290 | 0.41   | 0 | 39    | 0.00024 | 1    | U   | K.HGFLEEFITPIVK.A                        |
| <a href="#">5904</a>  | 588 - 600   | 765.4221  | 1528.8296 | 1528.8290 | 0.43   | 0 | 70    | 5.4e-07 | 1    | U   | K.HGFLEEFITPIVK.A                        |
| <a href="#">5905</a>  | 588 - 600   | 510.6172  | 1528.8297 | 1528.8290 | 0.45   | 0 | 30    | 0.0067  | 1    | U   | K.HGFLEEFITPIVK.A                        |
| <a href="#">5906</a>  | 588 - 600   | 765.4222  | 1528.8298 | 1528.8290 | 0.58   | 0 | 63    | 2.8e-06 | 1    | U   | K.HGFLEEFITPIVK.A                        |
| <a href="#">5907</a>  | 588 - 600   | 510.6173  | 1528.8300 | 1528.8290 | 0.69   | 0 | 34    | 0.0052  | 1    | U   | K.HGFLEEFITPIVK.A                        |
| <a href="#">5908</a>  | 588 - 600   | 765.4223  | 1528.8300 | 1528.8290 | 0.71   | 0 | 49    | 2.3e-05 | 1    | U   | K.HGFLEEFITPIVK.A                        |
| <a href="#">9596</a>  | 604 - 620   | 1080.5176 | 2159.0205 | 2159.0211 | -0.26  | 1 | 105   | 2.1e-09 | 1    | U   | K.NKQELSFYSIPEFDEWK.K                    |
| <a href="#">9597</a>  | 604 - 620   | 720.6815  | 2159.0227 | 2159.0211 | 0.73   | 1 | 31    | 0.039   | 1    | U   | K.NKQELSFYSIPEFDEWK.K                    |
| <a href="#">9598</a>  | 604 - 620   | 1080.5196 | 2159.0247 | 2159.0211 | 1.66   | 1 | 96    | 1.6e-08 | 1    | U   | K.NKQELSFYSIPEFDEWK.K                    |
| <a href="#">10031</a> | 604 - 621   | 763.3792  | 2287.1158 | 2287.1161 | -0.099 | 2 | 46    | 0.00023 | 1    | U   | K.NKQELSFYSIPEFDEWKK.H                   |
| <a href="#">8721</a>  | 606 - 620   | 959.4480  | 1916.8815 | 1916.8832 | -0.87  | 0 | 28    | 0.0064  | 1    | U   | K.QELSFYSIPEFDEWK.K                      |
| <a href="#">8722</a>  | 606 - 620   | 959.4483  | 1916.8821 | 1916.8832 | -0.57  | 0 | 43    | 0.0014  | 1    | U   | K.QELSFYSIPEFDEWK.K                      |
| <a href="#">8723</a>  | 606 - 620   | 959.4488  | 1916.8831 | 1916.8832 | -0.050 | 0 | 44    | 0.00059 | 1    | U   | K.QELSFYSIPEFDEWK.K                      |
| <a href="#">9179</a>  | 606 - 621   | 682.6664  | 2044.9773 | 2044.9782 | -0.44  | 1 | 41    | 0.00043 | 1    | U   | K.QELSFYSIPEFDEWKK.H                     |
| <a href="#">9180</a>  | 606 - 621   | 1023.4962 | 2044.9778 | 2044.9782 | -0.17  | 1 | 46    | 0.00015 | 1    | U   | K.QELSFYSIPEFDEWKK.H                     |
| <a href="#">1958</a>  | 647 - 654   | 530.7224  | 1059.4303 | 1059.4331 | -2.64  | 0 | 31    | 0.0043  | 1    | U   | K.EYFADMER.H                             |
| <a href="#">1959</a>  | 647 - 654   | 530.7237  | 1059.4328 | 1059.4331 | -0.33  | 0 | 21    | 0.038   | 1    | U   | K.EYFADMER.H                             |
| <a href="#">1960</a>  | 647 - 654   | 530.7239  | 1059.4332 | 1059.4331 | 0.044  | 0 | 32    | 0.0022  | 1    | U   | K.EYFADMER.H                             |
| <a href="#">1961</a>  | 647 - 654   | 530.7239  | 1059.4332 | 1059.4331 | 0.10   | 0 | 18    | 0.037   | 1    | U   | K.EYFADMER.H                             |
| <a href="#">2097</a>  | 647 - 654   | 538.7211  | 1075.4277 | 1075.4280 | -0.29  | 0 | 24    | 0.026   | 1    | U   | K.EYFADMER.H<br>+ Oxidation (M)          |
| <a href="#">2098</a>  | 647 - 654   | 538.7212  | 1075.4278 | 1075.4280 | -0.20  | 0 | 30    | 0.0067  | 1    | U   | K.EYFADMER.H<br>+ Oxidation (M)          |
| <a href="#">2101</a>  | 647 - 654   | 538.7215  | 1075.4284 | 1075.4280 | 0.32   | 0 | 27    | 0.017   | 1    | U   | K.EYFADMER.H<br>+ Oxidation (M)          |
| <a href="#">6967</a>  | 661 - 676   | 834.9084  | 1667.8023 | 1667.8042 | -1.19  | 0 | 90    | 4.2e-09 | 1    | U   | R.YAGPEDDAAITLAFSK.K                     |
| <a href="#">6968</a>  | 661 - 676   | 834.9084  | 1667.8023 | 1667.8042 | -1.15  | 0 | 79    | 6.6e-08 | 1    | U   | R.YAGPEDDAAITLAFSK.K                     |
| <a href="#">6969</a>  | 661 - 676   | 834.9087  | 1667.8028 | 1667.8042 | -0.89  | 0 | 76    | 1e-07   | 1    | U   | R.YAGPEDDAAITLAFSK.K                     |
| <a href="#">6970</a>  | 661 - 676   | 834.9087  | 1667.8028 | 1667.8042 | -0.89  | 0 | 45    | 6e-05   | 1    | U   | R.YAGPEDDAAITLAFSK.K                     |
| <a href="#">6971</a>  | 661 - 676   | 834.9090  | 1667.8033 | 1667.8042 | -0.54  | 0 | 50    | 5.5e-05 | 1    | U   | R.YAGPEDDAAITLAFSK.K                     |
| <a href="#">6972</a>  | 661 - 676   | 834.9090  | 1667.8035 | 1667.8042 | -0.44  | 0 | 90    | 1.9e-08 | 1    | U   | R.YAGPEDDAAITLAFSK.K                     |
| <a href="#">6973</a>  | 661 - 676   | 834.9091  | 1667.8036 | 1667.8042 | -0.37  | 0 | 78    | 1.7e-07 | 1    | U   | R.YAGPEDDAAITLAFSK.K                     |
| <a href="#">6974</a>  | 661 - 676   | 834.9092  | 1667.8037 | 1667.8042 | -0.30  | 0 | 96    | 3.8e-09 | 1    | U   | R.YAGPEDDAAITLAFSK.K                     |
| <a href="#">6976</a>  | 661 - 676   | 834.9092  | 1667.8039 | 1667.8042 | -0.21  | 0 | 82    | 1.3e-07 | 1    | U   | R.YAGPEDDAAITLAFSK.K                     |
| <a href="#">6977</a>  | 661 - 676   | 834.9093  | 1667.8040 | 1667.8042 | -0.15  | 0 | 46    | 4.5e-05 | 1    | U   | R.YAGPEDDAAITLAFSK.K                     |
| <a href="#">6978</a>  | 661 - 676   | 834.9093  | 1667.8040 | 1667.8042 | -0.14  | 0 | 69    | 6.6e-07 | 1    | U   | R.YAGPEDDAAITLAFSK.K                     |
| <a href="#">6979</a>  | 661 - 676   | 834.9093  | 1667.8040 | 1667.8042 | -0.12  | 0 | 56    | 6e-06   | 1    | U   | R.YAGPEDDAAITLAFSK.K                     |
| <a href="#">6980</a>  | 661 - 676   | 834.9094  | 1667.8042 | 1667.8042 | -0.046 | 0 | 49    | 4.7e-05 | 1    | U   | R.YAGPEDDAAITLAFSK.K                     |

| Query                | Start - End | Observed | Mr (expt) | Mr (calc) | ppm    | M | Score | Expect  | Rank | U | Peptide                           |
|----------------------|-------------|----------|-----------|-----------|--------|---|-------|---------|------|---|-----------------------------------|
| <a href="#">6981</a> | 661 - 676   | 834.9094 | 1667.8042 | 1667.8042 | -0.046 | 0 | 87    | 6.8e-09 | 1    | U | R.YAGPEDDAAITLAFSK.K              |
| <a href="#">6982</a> | 661 - 676   | 834.9094 | 1667.8042 | 1667.8042 | -0.010 | 0 | 77    | 3.2e-07 | 1    | U | R.YAGPEDDAAITLAFSK.K              |
| <a href="#">6983</a> | 661 - 676   | 834.9096 | 1667.8046 | 1667.8042 | 0.23   | 0 | 85    | 2.8e-08 | 1    | U | R.YAGPEDDAAITLAFSK.K              |
| <a href="#">6984</a> | 661 - 676   | 834.9096 | 1667.8046 | 1667.8042 | 0.24   | 0 | 86    | 2e-08   | 1    | U | R.YAGPEDDAAITLAFSK.K              |
| <a href="#">6985</a> | 661 - 676   | 834.9096 | 1667.8047 | 1667.8042 | 0.27   | 0 | 78    | 1.4e-07 | 1    | U | R.YAGPEDDAAITLAFSK.K              |
| <a href="#">6986</a> | 661 - 676   | 834.9097 | 1667.8048 | 1667.8042 | 0.33   | 0 | 77    | 4.5e-07 | 1    | U | R.YAGPEDDAAITLAFSK.K              |
| <a href="#">6987</a> | 661 - 676   | 834.9098 | 1667.8050 | 1667.8042 | 0.46   | 0 | 72    | 5e-07   | 1    | U | R.YAGPEDDAAITLAFSK.K              |
| <a href="#">6988</a> | 661 - 676   | 556.9423 | 1667.8050 | 1667.8042 | 0.46   | 0 | 51    | 9e-05   | 1    | U | R.YAGPEDDAAITLAFSK.K              |
| <a href="#">6989</a> | 661 - 676   | 834.9102 | 1667.8057 | 1667.8042 | 0.90   | 0 | 62    | 1.9e-06 | 1    | U | R.YAGPEDDAAITLAFSK.K              |
| <a href="#">6990</a> | 661 - 676   | 834.9103 | 1667.8060 | 1667.8042 | 1.07   | 0 | 20    | 0.02    | 1    | U | R.YAGPEDDAAITLAFSK.K              |
| <a href="#">6991</a> | 661 - 676   | 834.9111 | 1667.8076 | 1667.8042 | 1.99   | 0 | 79    | 4e-07   | 1    | U | R.YAGPEDDAAITLAFSK.K              |
| <a href="#">6992</a> | 661 - 676   | 834.9112 | 1667.8078 | 1667.8042 | 2.12   | 0 | 37    | 0.00076 | 1    | U | R.YAGPEDDAAITLAFSK.K              |
| <a href="#">5237</a> | 683 - 693   | 490.2344 | 1467.6815 | 1467.6816 | -0.11  | 1 | 27    | 0.047   | 1    |   | R.KEWLTFMEDR.R                    |
| <a href="#">5364</a> | 683 - 693   | 742.8450 | 1483.6754 | 1483.6765 | -0.77  | 1 | 18    | 0.043   | 1    |   | R.KEWLTFMEDR.R<br>+ Oxidation (M) |
| <a href="#">5365</a> | 683 - 693   | 495.5660 | 1483.6762 | 1483.6765 | -0.23  | 1 | 24    | 0.018   | 1    |   | R.KEWLTFMEDR.R<br>+ Oxidation (M) |
| <a href="#">5366</a> | 683 - 693   | 495.5660 | 1483.6763 | 1483.6765 | -0.15  | 1 | 19    | 0.047   | 1    |   | R.KEWLTFMEDR.R<br>+ Oxidation (M) |
| <a href="#">5367</a> | 683 - 693   | 742.8455 | 1483.6764 | 1483.6765 | -0.11  | 1 | 50    | 4e-05   | 1    |   | R.KEWLTFMEDR.R<br>+ Oxidation (M) |
| <a href="#">5368</a> | 683 - 693   | 495.5661 | 1483.6765 | 1483.6765 | -0.049 | 1 | 27    | 0.016   | 1    |   | R.KEWLTFMEDR.R<br>+ Oxidation (M) |
| <a href="#">5369</a> | 683 - 693   | 495.5662 | 1483.6768 | 1483.6765 | 0.15   | 1 | 28    | 0.024   | 1    |   | R.KEWLTFMEDR.R<br>+ Oxidation (M) |
| <a href="#">5371</a> | 683 - 693   | 742.8464 | 1483.6782 | 1483.6765 | 1.09   | 1 | 20    | 0.031   | 1    |   | R.KEWLTFMEDR.R<br>+ Oxidation (M) |
| <a href="#">5373</a> | 683 - 693   | 742.8470 | 1483.6794 | 1483.6765 | 1.92   | 1 | 23    | 0.045   | 1    |   | R.KEWLTFMEDR.R<br>+ Oxidation (M) |
| <a href="#">4279</a> | 684 - 693   | 670.8006 | 1339.5866 | 1339.5867 | -0.031 | 0 | 43    | 0.004   | 1    |   | K.EWLTFMEDR.R                     |
| <a href="#">4280</a> | 684 - 693   | 670.8006 | 1339.5866 | 1339.5867 | -0.031 | 0 | 24    | 0.01    | 1    |   | K.EWLTFMEDR.R                     |
| <a href="#">4281</a> | 684 - 693   | 670.8007 | 1339.5869 | 1339.5867 | 0.16   | 0 | 37    | 0.0034  | 1    |   | K.EWLTFMEDR.R                     |
| <a href="#">4367</a> | 684 - 693   | 678.7982 | 1355.5819 | 1355.5816 | 0.22   | 0 | 24    | 0.049   | 1    |   | K.EWLTFMEDR.R<br>+ Oxidation (M)  |
| <a href="#">4368</a> | 684 - 693   | 678.7984 | 1355.5822 | 1355.5816 | 0.46   | 0 | 25    | 0.034   | 1    |   | K.EWLTFMEDR.R<br>+ Oxidation (M)  |
| <a href="#">8221</a> | 697 - 712   | 610.9994 | 1829.9764 | 1829.9788 | -1.33  | 1 | 51    | 7e-05   | 1    | U | R.RLHGLPEQFLYGTATK.H              |
| <a href="#">8222</a> | 697 - 712   | 610.9996 | 1829.9770 | 1829.9788 | -0.99  | 1 | 37    | 0.0016  | 1    | U | R.RLHGLPEQFLYGTATK.H              |
| <a href="#">8226</a> | 697 - 712   | 611.0001 | 1829.9784 | 1829.9788 | -0.20  | 1 | 42    | 0.0038  | 1    | U | R.RLHGLPEQFLYGTATK.H              |
| <a href="#">8227</a> | 697 - 712   | 915.9966 | 1829.9785 | 1829.9788 | -0.14  | 1 | 79    | 5.6e-08 | 1    | U | R.RLHGLPEQFLYGTATK.H              |
| <a href="#">8228</a> | 697 - 712   | 611.0002 | 1829.9786 | 1829.9788 | -0.10  | 1 | 52    | 0.00015 | 1    | U | R.RLHGLPEQFLYGTATK.H              |
| <a href="#">8230</a> | 697 - 712   | 611.0002 | 1829.9788 | 1829.9788 | -0.019 | 1 | 70    | 6.2e-06 | 1    | U | R.RLHGLPEQFLYGTATK.H              |
| <a href="#">8231</a> | 697 - 712   | 611.0004 | 1829.9794 | 1829.9788 | 0.31   | 1 | 35    | 0.0035  | 1    | U | R.RLHGLPEQFLYGTATK.H              |
| <a href="#">8232</a> | 697 - 712   | 611.0004 | 1829.9795 | 1829.9788 | 0.36   | 1 | 28    | 0.0081  | 1    | U | R.RLHGLPEQFLYGTATK.H              |
| <a href="#">7026</a> | 698 - 712   | 837.9444 | 1673.8743 | 1673.8777 | -2.04  | 0 | 26    | 0.0083  | 1    | U | R.LHGLPEQFLYGTATK.H               |
| <a href="#">7027</a> | 698 - 712   | 837.9450 | 1673.8753 | 1673.8777 | -1.41  | 0 | 20    | 0.017   | 1    | U | R.LHGLPEQFLYGTATK.H               |
| <a href="#">7028</a> | 698 - 712   | 837.9452 | 1673.8759 | 1673.8777 | -1.06  | 0 | 20    | 0.023   | 1    | U | R.LHGLPEQFLYGTATK.H               |
| <a href="#">7030</a> | 698 - 712   | 837.9455 | 1673.8764 | 1673.8777 | -0.80  | 0 | 41    | 0.00066 | 1    | U | R.LHGLPEQFLYGTATK.H               |
| <a href="#">7032</a> | 698 - 712   | 837.9457 | 1673.8768 | 1673.8777 | -0.55  | 0 | 35    | 0.00058 | 1    | U | R.LHGLPEQFLYGTATK.H               |
| <a href="#">7033</a> | 698 - 712   | 558.9662 | 1673.8769 | 1673.8777 | -0.48  | 0 | 35    | 0.0013  | 1    | U | R.LHGLPEQFLYGTATK.H               |
| <a href="#">7034</a> | 698 - 712   | 837.9457 | 1673.8769 | 1673.8777 | -0.47  | 0 | 19    | 0.018   | 1    | U | R.LHGLPEQFLYGTATK.H               |
| <a href="#">7035</a> | 698 - 712   | 558.9663 | 1673.8770 | 1673.8777 | -0.45  | 0 | 29    | 0.0068  | 1    | U | R.LHGLPEQFLYGTATK.H               |
| <a href="#">7036</a> | 698 - 712   | 558.9663 | 1673.8771 | 1673.8777 | -0.36  | 0 | 42    | 0.0005  | 1    | U | R.LHGLPEQFLYGTATK.H               |
| <a href="#">7039</a> | 698 - 712   | 837.9459 | 1673.8772 | 1673.8777 | -0.28  | 0 | 24    | 0.0054  | 1    | U | R.LHGLPEQFLYGTATK.H               |
| <a href="#">7040</a> | 698 - 712   | 558.9664 | 1673.8774 | 1673.8777 | -0.20  | 0 | 31    | 0.0064  | 1    | U | R.LHGLPEQFLYGTATK.H               |
| <a href="#">7042</a> | 698 - 712   | 558.9665 | 1673.8776 | 1673.8777 | -0.089 | 0 | 48    | 0.0001  | 1    | U | R.LHGLPEQFLYGTATK.H               |
| <a href="#">7043</a> | 698 - 712   | 558.9665 | 1673.8776 | 1673.8777 | -0.089 | 0 | 52    | 3.6e-05 | 1    | U | R.LHGLPEQFLYGTATK.H               |
| <a href="#">7044</a> | 698 - 712   | 558.9665 | 1673.8776 | 1673.8777 | -0.071 | 0 | 30    | 0.0042  | 1    | U | R.LHGLPEQFLYGTATK.H               |
| <a href="#">7045</a> | 698 - 712   | 558.9665 | 1673.8776 | 1673.8777 | -0.071 | 0 | 29    | 0.012   | 1    | U | R.LHGLPEQFLYGTATK.H               |
| <a href="#">7046</a> | 698 - 712   | 837.9461 | 1673.8776 | 1673.8777 | -0.044 | 0 | 56    | 9.9e-06 | 1    | U | R.LHGLPEQFLYGTATK.H               |
| <a href="#">7047</a> | 698 - 712   | 558.9666 | 1673.8779 | 1673.8777 | 0.11   | 0 | 30    | 0.016   | 1    | U | R.LHGLPEQFLYGTATK.H               |
| <a href="#">7048</a> | 698 - 712   | 837.9462 | 1673.8779 | 1673.8777 | 0.11   | 0 | 20    | 0.015   | 1    | U | R.LHGLPEQFLYGTATK.H               |
| <a href="#">7050</a> | 698 - 712   | 837.9463 | 1673.8780 | 1673.8777 | 0.20   | 0 | 30    | 0.0017  | 1    | U | R.LHGLPEQFLYGTATK.H               |
| <a href="#">7051</a> | 698 - 712   | 558.9666 | 1673.8780 | 1673.8777 | 0.20   | 0 | 24    | 0.029   | 1    | U | R.LHGLPEQFLYGTATK.H               |
| <a href="#">7052</a> | 698 - 712   | 558.9666 | 1673.8781 | 1673.8777 | 0.22   | 0 | 36    | 0.019   | 1    | U | R.LHGLPEQFLYGTATK.H               |
| <a href="#">7054</a> | 698 - 712   | 558.9667 | 1673.8782 | 1673.8777 | 0.27   | 0 | 34    | 0.0051  | 1    | U | R.LHGLPEQFLYGTATK.H               |
| <a href="#">7055</a> | 698 - 712   | 837.9464 | 1673.8782 | 1673.8777 | 0.31   | 0 | 41    | 0.00015 | 1    | U | R.LHGLPEQFLYGTATK.H               |
| <a href="#">7056</a> | 698 - 712   | 558.9668 | 1673.8784 | 1673.8777 | 0.43   | 0 | 39    | 0.0036  | 1    | U | R.LHGLPEQFLYGTATK.H               |
| <a href="#">7058</a> | 698 - 712   | 837.9466 | 1673.8785 | 1673.8777 | 0.51   | 0 | 33    | 0.00081 | 1    | U | R.LHGLPEQFLYGTATK.H               |
| <a href="#">7060</a> | 698 - 712   | 837.9467 | 1673.8788 | 1673.8777 | 0.65   | 0 | 30    | 0.0029  | 1    | U | R.LHGLPEQFLYGTATK.H               |
| <a href="#">7061</a> | 698 - 712   | 837.9467 | 1673.8788 | 1673.8777 | 0.69   | 0 | 51    | 2.9e-05 | 1    | U | R.LHGLPEQFLYGTATK.H               |
| <a href="#">7063</a> | 698 - 712   | 558.9671 | 1673.8795 | 1673.8777 | 1.08   | 0 | 40    | 0.0076  | 1    | U | R.LHGLPEQFLYGTATK.H               |
| <a href="#">7064</a> | 698 - 712   | 558.9672 | 1673.8798 | 1673.8777 | 1.24   | 0 | 50    | 0.00017 | 1    | U | R.LHGLPEQFLYGTATK.H               |
| <a href="#">7065</a> | 698 - 712   | 558.9672 | 1673.8798 | 1673.8777 | 1.24   | 0 | 25    | 0.026   | 1    | U | R.LHGLPEQFLYGTATK.H               |
| <a href="#">7066</a> | 698 - 712   | 558.9673 | 1673.8801 | 1673.8777 | 1.45   | 0 | 22    | 0.023   | 1    | U | R.LHGLPEQFLYGTATK.H               |
| <a href="#">3638</a> | 713 - 722   | 632.8187 | 1263.6228 | 1263.6248 | -1.54  | 0 | 18    | 0.019   | 1    | U | K.HLTYNDFINK.E                    |
| <a href="#">3639</a> | 713 - 722   | 632.8188 | 1263.6231 | 1263.6248 | -1.28  | 0 | 24    | 0.045   | 1    | U | K.HLTYNDFINK.E                    |
| <a href="#">3643</a> | 713 - 722   | 632.8192 | 1263.6239 | 1263.6248 | -0.67  | 0 | 38    | 0.0015  | 1    | U | K.HLTYNDFINK.E                    |
| <a href="#">3646</a> | 713 - 722   | 632.8194 | 1263.6243 | 1263.6248 | -0.37  | 0 | 30    | 0.0024  | 1    | U | K.HLTYNDFINK.E                    |
| <a href="#">3648</a> | 713 - 722   | 632.8195 | 1263.6244 | 1263.6248 | -0.26  | 0 | 40    | 0.0011  | 1    | U | K.HLTYNDFINK.E                    |
| <a href="#">3650</a> | 713 - 722   | 632.8196 | 1263.6246 | 1263.6248 | -0.16  | 0 | 37    | 0.011   | 1    | U | K.HLTYNDFINK.E                    |
| <a href="#">3651</a> | 713 - 722   | 632.8196 | 1263.6246 | 1263.6248 | -0.097 | 0 | 32    | 0.0033  | 1    | U | K.HLTYNDFINK.E                    |
| <a href="#">3653</a> | 713 - 722   | 632.8196 | 1263.6247 | 1263.6248 | -0.082 | 0 | 28    | 0.021   | 1    | U | K.HLTYNDFINK.E                    |
| <a href="#">3654</a> | 713 - 722   | 422.2155 | 1263.6247 | 1263.6248 | -0.078 | 0 | 30    | 0.014   | 1    | U | K.HLTYNDFINK.E                    |
| <a href="#">3655</a> | 713 - 722   | 632.8196 | 1263.6247 | 1263.6248 | -0.066 | 0 | 24    | 0.022   | 1    | U | K.HLTYNDFINK.E                    |
| <a href="#">3656</a> | 713 - 722   | 632.8196 | 1263.6247 | 1263.6248 | -0.018 | 0 | 39    | 0.00035 | 1    | U | K.HLTYNDFINK.E                    |
| <a href="#">3658</a> | 713 - 722   | 632.8197 | 1263.6248 | 1263.6248 | 0.029  | 0 | 36    | 0.00068 | 1    | U | K.HLTYNDFINK.E                    |
| <a href="#">3659</a> | 713 - 722   | 632.8197 | 1263.6249 | 1263.6248 | 0.077  | 0 | 36    | 0.0013  | 1    | U | K.HLTYNDFINK.E                    |
| <a href="#">3660</a> | 713 - 722   | 632.8197 | 1263.6249 | 1263.6248 | 0.077  | 0 | 33    | 0.0019  | 1    | U | K.HLTYNDFINK.E                    |
| <a href="#">3661</a> | 713 - 722   | 632.8197 | 1263.6249 | 1263.6248 | 0.093  | 0 | 39    | 0.00098 | 1    | U | K.HLTYNDFINK.E                    |

| Query                | Start - End | Observed | Mr (expt) | Mr (calc) | ppm    | M | Score | Expect  | Rank | U | Peptide                            |
|----------------------|-------------|----------|-----------|-----------|--------|---|-------|---------|------|---|------------------------------------|
| <a href="#">3662</a> | 713 - 722   | 632.8198 | 1263.6250 | 1263.6248 | 0.16   | 0 | 22    | 0.0089  | 1    | U | K.HLTYNDFINK.E                     |
| <a href="#">3665</a> | 713 - 722   | 632.8198 | 1263.6250 | 1263.6248 | 0.22   | 0 | 23    | 0.022   | 1    | U | K.HLTYNDFINK.E                     |
| <a href="#">3666</a> | 713 - 722   | 632.8198 | 1263.6251 | 1263.6248 | 0.28   | 0 | 41    | 0.0004  | 1    | U | K.HLTYNDFINK.E                     |
| <a href="#">3667</a> | 713 - 722   | 632.8199 | 1263.6252 | 1263.6248 | 0.31   | 0 | 17    | 0.025   | 1    | U | K.HLTYNDFINK.E                     |
| <a href="#">3668</a> | 713 - 722   | 632.8200 | 1263.6255 | 1263.6248 | 0.57   | 0 | 46    | 0.00017 | 1    | U | K.HLTYNDFINK.E                     |
| <a href="#">4922</a> | 723 - 734   | 718.8527 | 1435.6908 | 1435.6943 | -2.44  | 0 | 33    | 0.0048  | 1    | K | ELILFNSDNER.S                      |
| <a href="#">4923</a> | 723 - 734   | 718.8532 | 1435.6917 | 1435.6943 | -1.77  | 0 | 43    | 0.0043  | 1    | K | ELILFNSDNER.S                      |
| <a href="#">4924</a> | 723 - 734   | 718.8535 | 1435.6924 | 1435.6943 | -1.30  | 0 | 21    | 0.019   | 1    | K | ELILFNSDNER.S                      |
| <a href="#">4925</a> | 723 - 734   | 718.8535 | 1435.6925 | 1435.6943 | -1.26  | 0 | 31    | 0.017   | 1    | K | ELILFNSDNER.S                      |
| <a href="#">4926</a> | 723 - 734   | 718.8542 | 1435.6938 | 1435.6943 | -0.34  | 0 | 29    | 0.022   | 1    | K | ELILFNSDNER.S                      |
| <a href="#">4927</a> | 723 - 734   | 718.8542 | 1435.6939 | 1435.6943 | -0.28  | 0 | 51    | 9.7e-05 | 1    | K | ELILFNSDNER.S                      |
| <a href="#">4928</a> | 723 - 734   | 718.8542 | 1435.6939 | 1435.6943 | -0.24  | 0 | 20    | 0.046   | 1    | K | ELILFNSDNER.S                      |
| <a href="#">4929</a> | 723 - 734   | 718.8543 | 1435.6940 | 1435.6943 | -0.20  | 0 | 29    | 0.0049  | 1    | K | ELILFNSDNER.S                      |
| <a href="#">4932</a> | 723 - 734   | 718.8544 | 1435.6942 | 1435.6943 | -0.071 | 0 | 29    | 0.033   | 1    | K | ELILFNSDNER.S                      |
| <a href="#">4934</a> | 723 - 734   | 718.8544 | 1435.6942 | 1435.6943 | -0.029 | 0 | 42    | 0.0024  | 1    | K | ELILFNSDNER.S                      |
| <a href="#">4935</a> | 723 - 734   | 718.8544 | 1435.6943 | 1435.6943 | -0.015 | 0 | 38    | 0.0047  | 1    | K | ELILFNSDNER.S                      |
| <a href="#">4939</a> | 723 - 734   | 718.8546 | 1435.6946 | 1435.6943 | 0.19   | 0 | 26    | 0.032   | 1    | K | ELILFNSDNER.S                      |
| <a href="#">4942</a> | 723 - 734   | 718.8549 | 1435.6952 | 1435.6943 | 0.65   | 0 | 31    | 0.0045  | 1    | K | ELILFNSDNER.S                      |
| <a href="#">4943</a> | 723 - 734   | 718.8550 | 1435.6954 | 1435.6943 | 0.75   | 0 | 46    | 0.0016  | 1    | K | ELILFNSDNER.S                      |
| <a href="#">4944</a> | 723 - 734   | 718.8550 | 1435.6954 | 1435.6943 | 0.78   | 0 | 42    | 0.0049  | 1    | K | ELILFNSDNER.S                      |
| <a href="#">4947</a> | 723 - 734   | 718.8550 | 1435.6955 | 1435.6943 | 0.86   | 0 | 22    | 0.022   | 1    | K | ELILFNSDNER.S                      |
| <a href="#">4948</a> | 723 - 734   | 718.8551 | 1435.6957 | 1435.6943 | 1.00   | 0 | 39    | 0.0013  | 1    | K | ELILFNSDNER.S                      |
| <a href="#">4949</a> | 723 - 734   | 718.8553 | 1435.6960 | 1435.6943 | 1.17   | 0 | 33    | 0.02    | 1    | K | ELILFNSDNER.S                      |
| <a href="#">4950</a> | 723 - 734   | 718.8555 | 1435.6964 | 1435.6943 | 1.45   | 0 | 39    | 0.0022  | 1    | K | ELILFNSDNER.S                      |
| <a href="#">5520</a> | 735 - 748   | 750.9105 | 1499.8064 | 1499.8096 | -2.15  | 0 | 31    | 0.0064  | 1    | U | R.SIPSLVDGFKPGQR.K                 |
| <a href="#">5525</a> | 735 - 748   | 750.9119 | 1499.8093 | 1499.8096 | -0.20  | 0 | 44    | 0.00068 | 1    | U | R.SIPSLVDGFKPGQR.K                 |
| <a href="#">5527</a> | 735 - 748   | 750.9122 | 1499.8097 | 1499.8096 | 0.078  | 0 | 53    | 9.9e-05 | 1    | U | R.SIPSLVDGFKPGQR.K                 |
| <a href="#">5536</a> | 735 - 748   | 750.9126 | 1499.8105 | 1499.8096 | 0.61   | 0 | 22    | 0.012   | 1    | U | R.SIPSLVDGFKPGQR.K                 |
| <a href="#">5538</a> | 735 - 748   | 750.9126 | 1499.8107 | 1499.8096 | 0.70   | 0 | 43    | 0.00069 | 1    | U | R.SIPSLVDGFKPGQR.K                 |
| <a href="#">5544</a> | 735 - 748   | 750.9130 | 1499.8114 | 1499.8096 | 1.21   | 0 | 15    | 0.041   | 1    | U | R.SIPSLVDGFKPGQR.K                 |
| <a href="#">4072</a> | 826 - 836   | 658.3573 | 1314.7000 | 1314.7006 | -0.43  | 0 | 45    | 0.00053 | 1    | U | R.YIFTMLSTLAR.L                    |
| <a href="#">4073</a> | 826 - 836   | 658.3574 | 1314.7002 | 1314.7006 | -0.30  | 0 | 46    | 0.00012 | 1    | U | R.YIFTMLSTLAR.L                    |
| <a href="#">4074</a> | 826 - 836   | 658.3574 | 1314.7002 | 1314.7006 | -0.28  | 0 | 47    | 0.00012 | 1    | U | R.YIFTMLSTLAR.L                    |
| <a href="#">4075</a> | 826 - 836   | 658.3575 | 1314.7004 | 1314.7006 | -0.16  | 0 | 48    | 0.00014 | 1    | U | R.YIFTMLSTLAR.L                    |
| <a href="#">4076</a> | 826 - 836   | 658.3575 | 1314.7004 | 1314.7006 | -0.098 | 0 | 43    | 0.00089 | 1    | U | R.YIFTMLSTLAR.L                    |
| <a href="#">4077</a> | 826 - 836   | 658.3576 | 1314.7006 | 1314.7006 | 0.024  | 0 | 35    | 0.0037  | 1    | U | R.YIFTMLSTLAR.L                    |
| <a href="#">4078</a> | 826 - 836   | 658.3576 | 1314.7006 | 1314.7006 | 0.024  | 0 | 36    | 0.0014  | 1    | U | R.YIFTMLSTLAR.L                    |
| <a href="#">4079</a> | 826 - 836   | 658.3576 | 1314.7006 | 1314.7006 | 0.024  | 0 | 31    | 0.002   | 1    | U | R.YIFTMLSTLAR.L                    |
| <a href="#">4080</a> | 826 - 836   | 658.3577 | 1314.7009 | 1314.7006 | 0.22   | 0 | 47    | 0.00012 | 1    | U | R.YIFTMLSTLAR.L                    |
| <a href="#">4081</a> | 826 - 836   | 658.3578 | 1314.7010 | 1314.7006 | 0.30   | 0 | 37    | 0.0021  | 1    | U | R.YIFTMLSTLAR.L                    |
| <a href="#">4082</a> | 826 - 836   | 658.3578 | 1314.7010 | 1314.7006 | 0.30   | 0 | 45    | 0.00027 | 1    | U | R.YIFTMLSTLAR.L                    |
| <a href="#">4083</a> | 826 - 836   | 658.3579 | 1314.7012 | 1314.7006 | 0.45   | 0 | 36    | 0.0012  | 1    | U | R.YIFTMLSTLAR.L                    |
| <a href="#">4084</a> | 826 - 836   | 658.3579 | 1314.7012 | 1314.7006 | 0.45   | 0 | 39    | 0.00078 | 1    | U | R.YIFTMLSTLAR.L                    |
| <a href="#">4085</a> | 826 - 836   | 658.3580 | 1314.7015 | 1314.7006 | 0.68   | 0 | 45    | 9.5e-05 | 1    | U | R.YIFTMLSTLAR.L                    |
| <a href="#">4206</a> | 826 - 836   | 666.3536 | 1330.6927 | 1330.6955 | -2.13  | 0 | 31    | 0.005   | 1    | U | R.YIFTMLSTLAR.L<br>+ Oxidation (M) |
| <a href="#">4207</a> | 826 - 836   | 666.3541 | 1330.6936 | 1330.6955 | -1.45  | 0 | 37    | 0.0021  | 1    | U | R.YIFTMLSTLAR.L<br>+ Oxidation (M) |
| <a href="#">4208</a> | 826 - 836   | 666.3546 | 1330.6947 | 1330.6955 | -0.61  | 0 | 23    | 0.023   | 1    | U | R.YIFTMLSTLAR.L<br>+ Oxidation (M) |
| <a href="#">4209</a> | 826 - 836   | 666.3549 | 1330.6953 | 1330.6955 | -0.14  | 0 | 33    | 0.0017  | 1    | U | R.YIFTMLSTLAR.L<br>+ Oxidation (M) |
| <a href="#">4213</a> | 826 - 836   | 666.3552 | 1330.6958 | 1330.6955 | 0.20   | 0 | 53    | 5.2e-05 | 1    | U | R.YIFTMLSTLAR.L<br>+ Oxidation (M) |
| <a href="#">4214</a> | 826 - 836   | 666.3552 | 1330.6958 | 1330.6955 | 0.23   | 0 | 50    | 6.2e-05 | 1    | U | R.YIFTMLSTLAR.L<br>+ Oxidation (M) |
| <a href="#">4215</a> | 826 - 836   | 666.3553 | 1330.6961 | 1330.6955 | 0.43   | 0 | 25    | 0.015   | 1    | U | R.YIFTMLSTLAR.L<br>+ Oxidation (M) |
| <a href="#">4217</a> | 826 - 836   | 666.3553 | 1330.6961 | 1330.6955 | 0.47   | 0 | 33    | 0.0016  | 1    | U | R.YIFTMLSTLAR.L<br>+ Oxidation (M) |
| <a href="#">4218</a> | 826 - 836   | 666.3554 | 1330.6962 | 1330.6955 | 0.52   | 0 | 24    | 0.031   | 1    | U | R.YIFTMLSTLAR.L<br>+ Oxidation (M) |
| <a href="#">4219</a> | 826 - 836   | 666.3555 | 1330.6964 | 1330.6955 | 0.72   | 0 | 54    | 3.1e-05 | 1    | U | R.YIFTMLSTLAR.L<br>+ Oxidation (M) |
| <a href="#">4220</a> | 826 - 836   | 666.3555 | 1330.6965 | 1330.6955 | 0.73   | 0 | 38    | 0.00055 | 1    | U | R.YIFTMLSTLAR.L<br>+ Oxidation (M) |
| <a href="#">4223</a> | 826 - 836   | 666.3562 | 1330.6979 | 1330.6955 | 1.78   | 0 | 21    | 0.029   | 1    | U | R.YIFTMLSTLAR.L<br>+ Oxidation (M) |
| <a href="#">4395</a> | 837 - 848   | 679.3897 | 1356.7648 | 1356.7653 | -0.37  | 0 | 29    | 0.014   | 1    | U | R.LLFPVDDNLLK.F                    |
| <a href="#">4396</a> | 837 - 848   | 679.3898 | 1356.7650 | 1356.7653 | -0.21  | 0 | 40    | 0.0038  | 1    | U | R.LLFPVDDNLLK.F                    |
| <a href="#">4397</a> | 837 - 848   | 679.3898 | 1356.7650 | 1356.7653 | -0.18  | 0 | 31    | 0.011   | 1    | U | R.LLFPVDDNLLK.F                    |
| <a href="#">4398</a> | 837 - 848   | 679.3898 | 1356.7651 | 1356.7653 | -0.16  | 0 | 36    | 0.0023  | 1    | U | R.LLFPVDDNLLK.F                    |
| <a href="#">4399</a> | 837 - 848   | 679.3898 | 1356.7651 | 1356.7653 | -0.13  | 0 | 41    | 0.0013  | 1    | U | R.LLFPVDDNLLK.F                    |
| <a href="#">4400</a> | 837 - 848   | 679.3899 | 1356.7652 | 1356.7653 | -0.089 | 0 | 43    | 0.00071 | 1    | U | R.LLFPVDDNLLK.F                    |
| <a href="#">4401</a> | 837 - 848   | 679.3899 | 1356.7653 | 1356.7653 | 0.014  | 0 | 37    | 0.0015  | 1    | U | R.LLFPVDDNLLK.F                    |
| <a href="#">4402</a> | 837 - 848   | 679.3900 | 1356.7654 | 1356.7653 | 0.073  | 0 | 40    | 0.0011  | 1    | U | R.LLFPVDDNLLK.F                    |
| <a href="#">4403</a> | 837 - 848   | 679.3900 | 1356.7654 | 1356.7653 | 0.10   | 0 | 52    | 0.00016 | 1    | U | R.LLFPVDDNLLK.F                    |
| <a href="#">4404</a> | 837 - 848   | 679.3900 | 1356.7654 | 1356.7653 | 0.10   | 0 | 29    | 0.0054  | 1    | U | R.LLFPVDDNLLK.F                    |
| <a href="#">4405</a> | 837 - 848   | 679.3900 | 1356.7655 | 1356.7653 | 0.18   | 0 | 69    | 3.8e-06 | 1    | U | R.LLFPVDDNLLK.F                    |
| <a href="#">4406</a> | 837 - 848   | 679.3901 | 1356.7656 | 1356.7653 | 0.24   | 0 | 35    | 0.0016  | 1    | U | R.LLFPVDDNLLK.F                    |
| <a href="#">4407</a> | 837 - 848   | 679.3902 | 1356.7658 | 1356.7653 | 0.40   | 0 | 23    | 0.021   | 1    | U | R.LLFPVDDNLLK.F                    |
| <a href="#">4408</a> | 837 - 848   | 679.3902 | 1356.7659 | 1356.7653 | 0.43   | 0 | 34    | 0.0097  | 1    | U | R.LLFPVDDNLLK.F                    |
| <a href="#">4411</a> | 837 - 848   | 679.3907 | 1356.7669 | 1356.7653 | 1.16   | 0 | 34    | 0.00066 | 1    | U | R.LLFPVDDNLLK.F                    |
| <a href="#">2053</a> | 849 - 856   | 535.7490 | 1069.4835 | 1069.4829 | 0.60   | 0 | 37    | 0.011   | 1    | K | FLYDDNQR.V                         |
| <a href="#">609</a>  | 885 - 891   | 424.7161 | 847.4176  | 847.4188  | -1.40  | 0 | 27    | 0.024   | 1    | U | K.LPNYDAR.E                        |
| <a href="#">612</a>  | 885 - 891   | 424.7168 | 847.4191  | 847.4188  | 0.40   | 0 | 38    | 0.007   | 1    | U | K.LPNYDAR.E                        |
| <a href="#">594</a>  | 892 - 898   | 422.2379 | 842.4613  | 842.4610  | 0.34   | 0 | 34    | 0.016   | 1    | U | R.EIVNNVR.R                        |
| <a href="#">7531</a> | 900 - 914   | 870.9240 | 1739.8334 | 1739.8375 | -2.32  | 0 | 40    | 0.0015  | 1    | U | R.MLDGLDPPHMLPNYK.N                |
| <a href="#">7540</a> | 900 - 914   | 580.9535 | 1739.8386 | 1739.8375 | 0.62   | 0 | 40    | 0.0022  | 1    | U | R.MLDGLDPPHMLPNYK.N                |
| <a href="#">7541</a> | 900 - 914   | 870.9268 | 1739.8389 | 1739.8375 | 0.84   | 0 | 68    | 2.9e-06 | 1    | U | R.MLDGLDPPHMLPNYK.N                |

| Query                 | Start - End | Observed  | Mr (expt) | Mr (calc) | ppm     | M | Score | Expect  | Rank | U | Peptide                                       |
|-----------------------|-------------|-----------|-----------|-----------|---------|---|-------|---------|------|---|-----------------------------------------------|
| <a href="#">7645</a>  | 900 - 914   | 878.9234  | 1755.8322 | 1755.8324 | -0.11   | 0 | 61    | 1.5e-05 | 1    | U | R.MLDGLDPHPMLPNYK.N<br>+ Oxidation (M)        |
| <a href="#">7648</a>  | 900 - 914   | 878.9235  | 1755.8325 | 1755.8324 | 0.040   | 0 | 28    | 0.0084  | 1    | U | R.MLDGLDPHPMLPNYK.N<br>+ Oxidation (M)        |
| <a href="#">7649</a>  | 900 - 914   | 878.9236  | 1755.8327 | 1755.8324 | 0.19    | 0 | 26    | 0.018   | 1    | U | R.MLDGLDPHPMLPNYK.N<br>+ Oxidation (M)        |
| <a href="#">7650</a>  | 900 - 914   | 878.9238  | 1755.8330 | 1755.8324 | 0.33    | 0 | 27    | 0.018   | 1    | U | R.MLDGLDPHPMLPNYK.N<br>+ Oxidation (M)        |
| <a href="#">7749</a>  | 900 - 914   | 886.9201  | 1771.8257 | 1771.8273 | -0.90   | 0 | 32    | 0.0019  | 1    | U | R.MLDGLDPHPMLPNYK.N<br>+ 2 Oxidation (M)      |
| <a href="#">7750</a>  | 900 - 914   | 886.9203  | 1771.8261 | 1771.8273 | -0.70   | 0 | 23    | 0.02    | 1    | U | R.MLDGLDPHPMLPNYK.N<br>+ 2 Oxidation (M)      |
| <a href="#">7755</a>  | 900 - 914   | 591.6165  | 1771.8278 | 1771.8273 | 0.27    | 0 | 35    | 0.023   | 1    | U | R.MLDGLDPHPMLPNYK.N<br>+ 2 Oxidation (M)      |
| <a href="#">7757</a>  | 900 - 914   | 886.9215  | 1771.8285 | 1771.8273 | 0.66    | 0 | 32    | 0.017   | 1    | U | R.MLDGLDPHPMLPNYK.N<br>+ 2 Oxidation (M)      |
| <a href="#">7759</a>  | 900 - 914   | 886.9229  | 1771.8312 | 1771.8273 | 2.20    | 0 | 34    | 0.0018  | 1    | U | R.MLDGLDPHPMLPNYK.N<br>+ 2 Oxidation (M)      |
| <a href="#">10319</a> | 918 - 939   | 808.4090  | 2422.2052 | 2422.2129 | -3.15   | 0 | 28    | 0.024   | 1    | U | K.GTIQELGQNYAVSGEIFVVDR.N                     |
| <a href="#">10320</a> | 918 - 939   | 808.4094  | 2422.2065 | 2422.2129 | -2.62   | 0 | 22    | 0.013   | 1    | U | K.GTIQELGQNYAVSGEIFVVDR.N                     |
| <a href="#">10321</a> | 918 - 939   | 1212.1110 | 2422.2075 | 2422.2129 | -2.21   | 0 | 53    | 2.2e-05 | 1    | U | K.GTIQELGQNYAVSGEIFVVDR.N                     |
| <a href="#">10323</a> | 918 - 939   | 1212.1119 | 2422.2092 | 2422.2129 | -1.52   | 0 | 115   | 3e-11   | 1    | U | K.GTIQELGQNYAVSGEIFVVDR.N                     |
| <a href="#">10325</a> | 918 - 939   | 808.4109  | 2422.2109 | 2422.2129 | -0.82   | 0 | 20    | 0.041   | 1    | U | K.GTIQELGQNYAVSGEIFVVDR.N                     |
| <a href="#">10326</a> | 918 - 939   | 808.4110  | 2422.2113 | 2422.2129 | -0.65   | 0 | 25    | 0.033   | 1    | U | K.GTIQELGQNYAVSGEIFVVDR.N                     |
| <a href="#">10327</a> | 918 - 939   | 808.4110  | 2422.2113 | 2422.2129 | -0.65   | 0 | 29    | 0.014   | 1    | U | K.GTIQELGQNYAVSGEIFVVDR.N                     |
| <a href="#">10328</a> | 918 - 939   | 808.4111  | 2422.2114 | 2422.2129 | -0.59   | 0 | 49    | 0.0011  | 1    | U | K.GTIQELGQNYAVSGEIFVVDR.N                     |
| <a href="#">10329</a> | 918 - 939   | 1212.1130 | 2422.2115 | 2422.2129 | -0.56   | 0 | 129   | 9.1e-12 | 1    | U | K.GTIQELGQNYAVSGEIFVVDR.N                     |
| <a href="#">10330</a> | 918 - 939   | 808.4114  | 2422.2122 | 2422.2129 | -0.26   | 0 | 32    | 0.021   | 1    | U | K.GTIQELGQNYAVSGEIFVVDR.N                     |
| <a href="#">10331</a> | 918 - 939   | 606.5604  | 2422.2123 | 2422.2129 | -0.22   | 0 | 36    | 0.0061  | 1    | U | K.GTIQELGQNYAVSGEIFVVDR.N                     |
| <a href="#">10332</a> | 918 - 939   | 808.4115  | 2422.2127 | 2422.2129 | -0.065  | 0 | 40    | 0.00093 | 1    | U | K.GTIQELGQNYAVSGEIFVVDR.N                     |
| <a href="#">10336</a> | 918 - 939   | 808.4116  | 2422.2130 | 2422.2129 | 0.046   | 0 | 44    | 0.00041 | 1    | U | K.GTIQELGQNYAVSGEIFVVDR.N                     |
| <a href="#">10338</a> | 918 - 939   | 1212.1139 | 2422.2133 | 2422.2129 | 0.18    | 0 | 24    | 0.024   | 1    | U | K.GTIQELGQNYAVSGEIFVVDR.N                     |
| <a href="#">10344</a> | 918 - 939   | 808.4122  | 2422.2149 | 2422.2129 | 0.84    | 0 | 44    | 0.0056  | 1    | U | K.GTIQELGQNYAVSGEIFVVDR.N                     |
| <a href="#">10345</a> | 918 - 939   | 808.4123  | 2422.2150 | 2422.2129 | 0.86    | 0 | 31    | 0.0038  | 1    | U | K.GTIQELGQNYAVSGEIFVVDR.N                     |
| <a href="#">10348</a> | 918 - 939   | 1212.1153 | 2422.2160 | 2422.2129 | 1.30    | 0 | 64    | 6.1e-06 | 1    | U | K.GTIQELGQNYAVSGEIFVVDR.N                     |
| <a href="#">10349</a> | 918 - 939   | 808.4126  | 2422.2161 | 2422.2129 | 1.32    | 0 | 49    | 0.00052 | 1    | U | K.GTIQELGQNYAVSGEIFVVDR.N                     |
| <a href="#">10354</a> | 918 - 939   | 808.4140  | 2422.2203 | 2422.2129 | 3.07    | 0 | 23    | 0.013   | 1    | U | K.GTIQELGQNYAVSGEIFVVDR.N                     |
| <a href="#">3705</a>  | 940 - 950   | 635.8525  | 1269.6905 | 1269.6929 | -1.88   | 0 | 36    | 0.0049  | 1    | U | R.NTVEITELPVR.T                               |
| <a href="#">3706</a>  | 940 - 950   | 635.8526  | 1269.6906 | 1269.6929 | -1.80   | 0 | 51    | 0.00025 | 1    | U | R.NTVEITELPVR.T                               |
| <a href="#">3708</a>  | 940 - 950   | 635.8532  | 1269.6918 | 1269.6929 | -0.81   | 0 | 67    | 8.3e-06 | 1    | U | R.NTVEITELPVR.T                               |
| <a href="#">3710</a>  | 940 - 950   | 635.8535  | 1269.6924 | 1269.6929 | -0.37   | 0 | 73    | 2.4e-06 | 1    | U | R.NTVEITELPVR.T                               |
| <a href="#">3711</a>  | 940 - 950   | 635.8535  | 1269.6924 | 1269.6929 | -0.34   | 0 | 36    | 0.0027  | 1    | U | R.NTVEITELPVR.T                               |
| <a href="#">3712</a>  | 940 - 950   | 635.8536  | 1269.6925 | 1269.6929 | -0.24   | 0 | 54    | 0.00022 | 1    | U | R.NTVEITELPVR.T                               |
| <a href="#">3714</a>  | 940 - 950   | 635.8537  | 1269.6929 | 1269.6929 | 0.041   | 0 | 55    | 0.00017 | 1    | U | R.NTVEITELPVR.T                               |
| <a href="#">3715</a>  | 940 - 950   | 635.8538  | 1269.6930 | 1269.6929 | 0.10    | 0 | 52    | 5.3e-05 | 1    | U | R.NTVEITELPVR.T                               |
| <a href="#">3717</a>  | 940 - 950   | 424.2383  | 1269.6931 | 1269.6929 | 0.22    | 0 | 53    | 0.00028 | 1    | U | R.NTVEITELPVR.T                               |
| <a href="#">3718</a>  | 940 - 950   | 635.8540  | 1269.6935 | 1269.6929 | 0.53    | 0 | 29    | 0.013   | 1    | U | R.NTVEITELPVR.T                               |
| <a href="#">3719</a>  | 940 - 950   | 635.8541  | 1269.6936 | 1269.6929 | 0.62    | 0 | 34    | 0.0022  | 1    | U | R.NTVEITELPVR.T                               |
| <a href="#">3720</a>  | 940 - 950   | 635.8541  | 1269.6937 | 1269.6929 | 0.66    | 0 | 30    | 0.0078  | 1    | U | R.NTVEITELPVR.T                               |
| <a href="#">5288</a>  | 958 - 970   | 737.3668  | 1472.7190 | 1472.7181 | 0.62    | 0 | 28    | 0.015   | 1    | U | K.EQVLEPMLNGTDK.T                             |
| <a href="#">5410</a>  | 958 - 970   | 745.3629  | 1488.7113 | 1488.7130 | -1.15   | 0 | 42    | 0.00073 | 1    | U | K.EQVLEPMLNGTDK.T<br>+ Oxidation (M)          |
| <a href="#">5413</a>  | 958 - 970   | 745.3634  | 1488.7122 | 1488.7130 | -0.50   | 0 | 50    | 0.00016 | 1    | U | K.EQVLEPMLNGTDK.T<br>+ Oxidation (M)          |
| <a href="#">10519</a> | 958 - 979   | 826.7526  | 2477.2358 | 2477.2359 | -0.044  | 1 | 34    | 0.0058  | 1    | U | K.EQVLEPMLNGTDKTPALISDYK.E<br>+ Oxidation (M) |
| <a href="#">10521</a> | 958 - 979   | 826.7545  | 2477.2417 | 2477.2359 | 2.32    | 1 | 21    | 0.042   | 1    | U | K.EQVLEPMLNGTDKTPALISDYK.E<br>+ Oxidation (M) |
| <a href="#">1571</a>  | 971 - 979   | 504.2740  | 1006.5335 | 1006.5335 | -0.0050 | 0 | 31    | 0.01    | 1    | U | K.TPALISDYK.E                                 |
| <a href="#">1572</a>  | 971 - 979   | 504.2741  | 1006.5337 | 1006.5335 | 0.17    | 0 | 52    | 0.00019 | 1    | U | K.TPALISDYK.E                                 |
| <a href="#">1573</a>  | 971 - 979   | 504.2741  | 1006.5337 | 1006.5335 | 0.19    | 0 | 15    | 0.042   | 1    | U | K.TPALISDYK.E                                 |
| <a href="#">1574</a>  | 971 - 979   | 504.2741  | 1006.5337 | 1006.5335 | 0.21    | 0 | 30    | 0.011   | 1    | U | K.TPALISDYK.E                                 |
| <a href="#">9302</a>  | 971 - 988   | 521.2650  | 2081.0308 | 2081.0317 | -0.42   | 1 | 27    | 0.03    | 1    | U | K.TPALISDYKEYHTDITTVK.F                       |
| <a href="#">9303</a>  | 971 - 988   | 694.6842  | 2081.0309 | 2081.0317 | -0.40   | 1 | 37    | 0.00095 | 1    | U | K.TPALISDYKEYHTDITTVK.F                       |
| <a href="#">9306</a>  | 971 - 988   | 1041.5232 | 2081.0319 | 2081.0317 | 0.10    | 1 | 61    | 5.7e-06 | 1    | U | K.TPALISDYKEYHTDITTVK.F                       |
| <a href="#">9307</a>  | 971 - 988   | 694.6846  | 2081.0319 | 2081.0317 | 0.11    | 1 | 26    | 0.011   | 1    | U | K.TPALISDYKEYHTDITTVK.F                       |
| <a href="#">9311</a>  | 971 - 988   | 1041.5246 | 2081.0346 | 2081.0317 | 1.39    | 1 | 23    | 0.013   | 1    | U | K.TPALISDYKEYHTDITTVK.F                       |
| <a href="#">2258</a>  | 980 - 988   | 547.2616  | 1092.5087 | 1092.5088 | -0.028  | 0 | 26    | 0.028   | 1    | U | K.EYHTDITTVK.F                                |
| <a href="#">2261</a>  | 980 - 988   | 547.2619  | 1092.5093 | 1092.5088 | 0.48    | 0 | 31    | 0.013   | 1    | U | K.EYHTDITTVK.F                                |
| <a href="#">2262</a>  | 980 - 988   | 547.2622  | 1092.5098 | 1092.5088 | 0.94    | 0 | 28    | 0.027   | 1    | U | K.EYHTDITTVK.F                                |
| <a href="#">2374</a>  | 998 - 1008  | 370.2084  | 1107.6033 | 1107.6036 | -0.33   | 0 | 45    | 0.0012  | 1    | U | K.LAQAEAAAGLHK.V                              |
| <a href="#">2375</a>  | 998 - 1008  | 554.8089  | 1107.6033 | 1107.6036 | -0.32   | 0 | 43    | 0.00039 | 1    | U | K.LAQAEAAAGLHK.V                              |
| <a href="#">2376</a>  | 998 - 1008  | 554.8090  | 1107.6034 | 1107.6036 | -0.18   | 0 | 54    | 7.3e-05 | 1    | U | K.LAQAEAAAGLHK.V                              |
| <a href="#">2377</a>  | 998 - 1008  | 370.2084  | 1107.6035 | 1107.6036 | -0.12   | 0 | 39    | 0.0028  | 1    | U | K.LAQAEAAAGLHK.V                              |
| <a href="#">2378</a>  | 998 - 1008  | 554.8091  | 1107.6036 | 1107.6036 | 0.023   | 0 | 30    | 0.048   | 1    | U | K.LAQAEAAAGLHK.V                              |
| <a href="#">2379</a>  | 998 - 1008  | 554.8091  | 1107.6037 | 1107.6036 | 0.096   | 0 | 49    | 0.0006  | 1    | U | K.LAQAEAAAGLHK.V                              |
| <a href="#">2380</a>  | 998 - 1008  | 370.2085  | 1107.6037 | 1107.6036 | 0.099   | 0 | 37    | 0.004   | 1    | U | K.LAQAEAAAGLHK.V                              |
| <a href="#">2381</a>  | 998 - 1008  | 370.2086  | 1107.6039 | 1107.6036 | 0.23    | 0 | 36    | 0.0043  | 1    | U | K.LAQAEAAAGLHK.V                              |
| <a href="#">3401</a>  | 1032 - 1041 | 618.8446  | 1235.6747 | 1235.6761 | -1.15   | 1 | 33    | 0.0067  | 1    | U | K.KYETVQDILK.E                                |
| <a href="#">3402</a>  | 1032 - 1041 | 618.8453  | 1235.6760 | 1235.6761 | -0.084  | 1 | 38    | 0.00066 | 1    | U | K.KYETVQDILK.E                                |
| <a href="#">3403</a>  | 1032 - 1041 | 618.8454  | 1235.6763 | 1235.6761 | 0.11    | 1 | 58    | 1.5e-05 | 1    | U | K.KYETVQDILK.E                                |
| <a href="#">3404</a>  | 1032 - 1041 | 412.8994  | 1235.6764 | 1235.6761 | 0.24    | 1 | 39    | 0.006   | 1    | U | K.KYETVQDILK.E                                |
| <a href="#">3405</a>  | 1032 - 1041 | 618.8455  | 1235.6765 | 1235.6761 | 0.32    | 1 | 48    | 0.00051 | 1    | U | K.KYETVQDILK.E                                |
| <a href="#">3408</a>  | 1032 - 1041 | 618.8457  | 1235.6769 | 1235.6761 | 0.60    | 1 | 66    | 2.1e-06 | 1    | U | K.KYETVQDILK.E                                |
| <a href="#">2372</a>  | 1033 - 1041 | 554.7984  | 1107.5823 | 1107.5812 | 1.00    | 0 | 37    | 0.012   | 1    | U | K.YETVQDILK.E                                 |
| <a href="#">727</a>   | 1048 - 1054 | 436.2371  | 870.4597  | 870.4599  | -0.26   | 0 | 31    | 0.021   | 1    | U | R.LSYYGLR.K                                   |
| <a href="#">729</a>   | 1048 - 1054 | 436.2377  | 870.4609  | 870.4599  | 1.10    | 0 | 39    | 0.002   | 1    | U | R.LSYYGLR.K                                   |
| <a href="#">6081</a>  | 1055 - 1068 | 774.9078  | 1547.8011 | 1547.8017 | -0.42   | 1 | 48    | 0.00031 | 1    | U | R.KEWLVGMLGAESTK.L                            |
| <a href="#">6082</a>  | 1055 - 1068 | 774.9082  | 1547.8019 | 1547.8017 | 0.13    | 1 | 69    | 9.2e-06 | 1    | U | R.KEWLVGMLGAESTK.L                            |
| <a href="#">6083</a>  | 1055 - 1068 | 516.9418  | 1547.8036 | 1547.8017 | 1.18    | 1 | 33    | 0.0056  | 1    | U | R.KEWLVGMLGAESTK.L                            |



| Query                 | Start - End | Observed  | Mr (expt) | Mr (calc) | ppm     | M | Score | Expect  | Rank | U | Peptide                                            |
|-----------------------|-------------|-----------|-----------|-----------|---------|---|-------|---------|------|---|----------------------------------------------------|
| <a href="#">6216</a>  | 1055 - 1068 | 782.9049  | 1563.7952 | 1563.7967 | -0.92   | 1 | 36    | 0.0022  | 1    | U | R.KEWLVGMLGAESTK.L<br>+ Oxidation (M)              |
| <a href="#">6218</a>  | 1055 - 1068 | 782.9054  | 1563.7962 | 1563.7967 | -0.26   | 1 | 70    | 1.6e-06 | 1    | U | R.KEWLVGMLGAESTK.L<br>+ Oxidation (M)              |
| <a href="#">6219</a>  | 1055 - 1068 | 522.2732  | 1563.7977 | 1563.7967 | 0.63    | 1 | 27    | 0.022   | 1    | U | R.KEWLVGMLGAESTK.L<br>+ Oxidation (M)              |
| <a href="#">6220</a>  | 1055 - 1068 | 522.2735  | 1563.7988 | 1563.7967 | 1.34    | 1 | 25    | 0.02    | 1    | U | R.KEWLVGMLGAESTK.L<br>+ Oxidation (M)              |
| <a href="#">4796</a>  | 1056 - 1068 | 710.8608  | 1419.7070 | 1419.7068 | 0.13    | 0 | 22    | 0.021   | 1    | U | K.EWLVGMLGAESTK.L                                  |
| <a href="#">4797</a>  | 1056 - 1068 | 710.8609  | 1419.7072 | 1419.7068 | 0.32    | 0 | 50    | 2.3e-05 | 1    | U | K.EWLVGMLGAESTK.L                                  |
| <a href="#">4798</a>  | 1056 - 1068 | 710.8614  | 1419.7082 | 1419.7068 | 0.99    | 0 | 38    | 0.00052 | 1    | U | K.EWLVGMLGAESTK.L                                  |
| <a href="#">4954</a>  | 1056 - 1068 | 718.8578  | 1435.7010 | 1435.7017 | -0.47   | 0 | 35    | 0.0096  | 1    | U | K.EWLVGMLGAESTK.L<br>+ Oxidation (M)               |
| <a href="#">3487</a>  | 1092 - 1101 | 622.3632  | 1242.7118 | 1242.7118 | 0.00080 | 1 | 59    | 4.9e-05 | 1    | U | K.KDLIQMLVQR.G                                     |
| <a href="#">3488</a>  | 1092 - 1101 | 415.2447  | 1242.7122 | 1242.7118 | 0.30    | 1 | 37    | 0.0083  | 1    | U | K.KDLIQMLVQR.G                                     |
| <a href="#">3619</a>  | 1092 - 1101 | 630.3608  | 1258.7070 | 1258.7067 | 0.26    | 1 | 51    | 0.00049 | 1    | U | K.KDLIQMLVQR.G<br>+ Oxidation (M)                  |
| <a href="#">3620</a>  | 1092 - 1101 | 630.3610  | 1258.7075 | 1258.7067 | 0.65    | 1 | 55    | 0.00013 | 1    | U | K.KDLIQMLVQR.G<br>+ Oxidation (M)                  |
| <a href="#">3621</a>  | 1092 - 1101 | 420.5766  | 1258.7079 | 1258.7067 | 0.94    | 1 | 46    | 0.0011  | 1    | U | K.KDLIQMLVQR.G<br>+ Oxidation (M)                  |
| <a href="#">2441</a>  | 1093 - 1101 | 558.3156  | 1114.6166 | 1114.6169 | -0.24   | 0 | 51    | 0.00044 | 1    | U | K.DLIQMLVQR.G                                      |
| <a href="#">2442</a>  | 1093 - 1101 | 558.3158  | 1114.6170 | 1114.6169 | 0.10    | 0 | 45    | 0.0011  | 1    | U | K.DLIQMLVQR.G                                      |
| <a href="#">2443</a>  | 1093 - 1101 | 558.3159  | 1114.6172 | 1114.6169 | 0.36    | 0 | 55    | 0.0002  | 1    | U | K.DLIQMLVQR.G                                      |
| <a href="#">2444</a>  | 1093 - 1101 | 558.3159  | 1114.6173 | 1114.6169 | 0.41    | 0 | 51    | 0.00047 | 1    | U | K.DLIQMLVQR.G                                      |
| <a href="#">2589</a>  | 1093 - 1101 | 566.3121  | 1130.6096 | 1130.6118 | -1.93   | 0 | 38    | 0.0069  | 1    | U | K.DLIQMLVQR.G<br>+ Oxidation (M)                   |
| <a href="#">2591</a>  | 1093 - 1101 | 566.3122  | 1130.6099 | 1130.6118 | -1.65   | 0 | 54    | 0.00025 | 1    | U | K.DLIQMLVQR.G<br>+ Oxidation (M)                   |
| <a href="#">2592</a>  | 1093 - 1101 | 566.3129  | 1130.6113 | 1130.6118 | -0.41   | 0 | 38    | 0.0031  | 1    | U | K.DLIQMLVQR.G<br>+ Oxidation (M)                   |
| <a href="#">2593</a>  | 1093 - 1101 | 566.3130  | 1130.6114 | 1130.6118 | -0.34   | 0 | 39    | 0.0088  | 1    | U | K.DLIQMLVQR.G<br>+ Oxidation (M)                   |
| <a href="#">2594</a>  | 1093 - 1101 | 566.3132  | 1130.6119 | 1130.6118 | 0.14    | 0 | 40    | 0.0031  | 1    | U | K.DLIQMLVQR.G<br>+ Oxidation (M)                   |
| <a href="#">2595</a>  | 1093 - 1101 | 566.3133  | 1130.6120 | 1130.6118 | 0.21    | 0 | 48    | 0.00099 | 1    | U | K.DLIQMLVQR.G<br>+ Oxidation (M)                   |
| <a href="#">2596</a>  | 1093 - 1101 | 566.3133  | 1130.6120 | 1130.6118 | 0.23    | 0 | 51    | 0.0005  | 1    | U | K.DLIQMLVQR.G<br>+ Oxidation (M)                   |
| <a href="#">2597</a>  | 1093 - 1101 | 566.3133  | 1130.6121 | 1130.6118 | 0.26    | 0 | 41    | 0.0049  | 1    | U | K.DLIQMLVQR.G<br>+ Oxidation (M)                   |
| <a href="#">2598</a>  | 1093 - 1101 | 566.3134  | 1130.6123 | 1130.6118 | 0.49    | 0 | 28    | 0.022   | 1    | U | K.DLIQMLVQR.G<br>+ Oxidation (M)                   |
| <a href="#">2599</a>  | 1093 - 1101 | 566.3135  | 1130.6124 | 1130.6118 | 0.58    | 0 | 51    | 0.00029 | 1    | U | K.DLIQMLVQR.G<br>+ Oxidation (M)                   |
| <a href="#">2600</a>  | 1093 - 1101 | 566.3136  | 1130.6126 | 1130.6118 | 0.70    | 0 | 43    | 0.0019  | 1    | U | K.DLIQMLVQR.G<br>+ Oxidation (M)                   |
| <a href="#">823</a>   | 1102 - 1109 | 447.7137  | 893.4129  | 893.4131  | -0.19   | 0 | 47    | 8.2e-05 | 1    | U | R.GYESDPVK.A                                       |
| <a href="#">824</a>   | 1102 - 1109 | 447.7138  | 893.4130  | 893.4131  | -0.075  | 0 | 28    | 0.0076  | 1    | U | R.GYESDPVK.A                                       |
| <a href="#">1419</a>  | 1157 - 1164 | 494.2898  | 986.5651  | 986.5648  | 0.34    | 1 | 40    | 0.0045  | 1    | U | K.EKVEELIK.Q                                       |
| <a href="#">1421</a>  | 1157 - 1164 | 494.2899  | 986.5653  | 986.5648  | 0.56    | 1 | 34    | 0.018   | 2    | U | K.EKVEELIK.Q                                       |
| <a href="#">2198</a>  | 1170 - 1178 | 543.8046  | 1085.5946 | 1085.5941 | 0.48    | 2 | 40    | 0.0053  | 1    | U | K.GREVNDLKR.K                                      |
| <a href="#">2199</a>  | 1170 - 1178 | 362.8725  | 1085.5956 | 1085.5941 | 1.36    | 2 | 42    | 0.0035  | 1    | U | K.GREVNDLKR.K                                      |
| <a href="#">737</a>   | 1172 - 1178 | 437.2427  | 872.4709  | 872.4716  | -0.79   | 1 | 37    | 0.01    | 1    | U | R.EVNDLKR.K                                        |
| <a href="#">526</a>   | 1180 - 1186 | 416.7138  | 831.4130  | 831.4127  | 0.37    | 0 | 33    | 0.025   | 1    | U | K.SPSDLWK.E                                        |
| <a href="#">4546</a>  | 1187 - 1198 | 689.8403  | 1377.6661 | 1377.6664 | -0.16   | 0 | 51    | 0.00025 | 1    | U | K.EDLAAFVEELDK.V                                   |
| <a href="#">4547</a>  | 1187 - 1198 | 689.8404  | 1377.6662 | 1377.6664 | -0.075  | 0 | 24    | 0.011   | 1    | U | K.EDLAAFVEELDK.V                                   |
| <a href="#">4548</a>  | 1187 - 1198 | 689.8405  | 1377.6665 | 1377.6664 | 0.13    | 0 | 54    | 7.9e-05 | 1    | U | K.EDLAAFVEELDK.V                                   |
| <a href="#">4550</a>  | 1187 - 1198 | 689.8407  | 1377.6668 | 1377.6664 | 0.36    | 0 | 30    | 0.008   | 1    | U | K.EDLAAFVEELDK.V                                   |
| <a href="#">9415</a>  | 1187 - 1204 | 1054.0101 | 2106.0056 | 2106.0117 | -2.86   | 1 | 72    | 1.3e-06 | 1    | U | K.EDLAAFVEELDKVESQER.E                             |
| <a href="#">9416</a>  | 1187 - 1204 | 703.0099  | 2106.0078 | 2106.0117 | -1.81   | 1 | 49    | 0.00014 | 1    | U | K.EDLAAFVEELDKVESQER.E                             |
| <a href="#">9417</a>  | 1187 - 1204 | 703.0103  | 2106.0092 | 2106.0117 | -1.19   | 1 | 29    | 0.018   | 1    | U | K.EDLAAFVEELDKVESQER.E                             |
| <a href="#">9418</a>  | 1187 - 1204 | 1054.0122 | 2106.0099 | 2106.0117 | -0.82   | 1 | 77    | 4.6e-07 | 1    | U | K.EDLAAFVEELDKVESQER.E                             |
| <a href="#">9419</a>  | 1187 - 1204 | 1054.0124 | 2106.0102 | 2106.0117 | -0.71   | 1 | 79    | 2.4e-07 | 1    | U | K.EDLAAFVEELDKVESQER.E                             |
| <a href="#">9420</a>  | 1187 - 1204 | 703.0108  | 2106.0106 | 2106.0117 | -0.50   | 1 | 31    | 0.013   | 1    | U | K.EDLAAFVEELDKVESQER.E                             |
| <a href="#">9421</a>  | 1187 - 1204 | 703.0109  | 2106.0109 | 2106.0117 | -0.37   | 1 | 33    | 0.0097  | 1    | U | K.EDLAAFVEELDKVESQER.E                             |
| <a href="#">9422</a>  | 1187 - 1204 | 1054.0127 | 2106.0109 | 2106.0117 | -0.36   | 1 | 61    | 6.9e-06 | 1    | U | K.EDLAAFVEELDKVESQER.E                             |
| <a href="#">9423</a>  | 1187 - 1204 | 1054.0127 | 2106.0109 | 2106.0117 | -0.35   | 1 | 84    | 5e-08   | 1    | U | K.EDLAAFVEELDKVESQER.E                             |
| <a href="#">9424</a>  | 1187 - 1204 | 703.0110  | 2106.0111 | 2106.0117 | -0.25   | 1 | 33    | 0.007   | 1    | U | K.EDLAAFVEELDKVESQER.E                             |
| <a href="#">9426</a>  | 1187 - 1204 | 703.0112  | 2106.0118 | 2106.0117 | 0.068   | 1 | 32    | 0.012   | 1    | U | K.EDLAAFVEELDKVESQER.E                             |
| <a href="#">9427</a>  | 1187 - 1204 | 703.0113  | 2106.0120 | 2106.0117 | 0.15    | 1 | 33    | 0.02    | 1    | U | K.EDLAAFVEELDKVESQER.E                             |
| <a href="#">9428</a>  | 1187 - 1204 | 703.0113  | 2106.0120 | 2106.0117 | 0.18    | 1 | 40    | 0.0027  | 1    | U | K.EDLAAFVEELDKVESQER.E                             |
| <a href="#">9429</a>  | 1187 - 1204 | 1054.0133 | 2106.0121 | 2106.0117 | 0.22    | 1 | 43    | 0.0002  | 1    | U | K.EDLAAFVEELDKVESQER.E                             |
| <a href="#">9430</a>  | 1187 - 1204 | 703.0113  | 2106.0121 | 2106.0117 | 0.23    | 1 | 35    | 0.0077  | 1    | U | K.EDLAAFVEELDKVESQER.E                             |
| <a href="#">9431</a>  | 1187 - 1204 | 703.0114  | 2106.0123 | 2106.0117 | 0.30    | 1 | 38    | 0.0063  | 1    | U | K.EDLAAFVEELDKVESQER.E                             |
| <a href="#">9432</a>  | 1187 - 1204 | 703.0114  | 2106.0123 | 2106.0117 | 0.32    | 1 | 25    | 0.047   | 1    | U | K.EDLAAFVEELDKVESQER.E                             |
| <a href="#">9433</a>  | 1187 - 1204 | 703.0114  | 2106.0124 | 2106.0117 | 0.35    | 1 | 40    | 0.003   | 1    | U | K.EDLAAFVEELDKVESQER.E                             |
| <a href="#">9434</a>  | 1187 - 1204 | 1054.0135 | 2106.0124 | 2106.0117 | 0.38    | 1 | 55    | 5.2e-05 | 1    | U | K.EDLAAFVEELDKVESQER.E                             |
| <a href="#">9435</a>  | 1187 - 1204 | 703.0114  | 2106.0125 | 2106.0117 | 0.41    | 1 | 27    | 0.023   | 1    | U | K.EDLAAFVEELDKVESQER.E                             |
| <a href="#">9436</a>  | 1187 - 1204 | 703.0115  | 2106.0127 | 2106.0117 | 0.48    | 1 | 40    | 0.0014  | 1    | U | K.EDLAAFVEELDKVESQER.E                             |
| <a href="#">9437</a>  | 1187 - 1204 | 703.0115  | 2106.0127 | 2106.0117 | 0.48    | 1 | 27    | 0.024   | 1    | U | K.EDLAAFVEELDKVESQER.E                             |
| <a href="#">9438</a>  | 1187 - 1204 | 1054.0137 | 2106.0129 | 2106.0117 | 0.57    | 1 | 68    | 5.5e-06 | 1    | U | K.EDLAAFVEELDKVESQER.E                             |
| <a href="#">9439</a>  | 1187 - 1204 | 1054.0141 | 2106.0136 | 2106.0117 | 0.94    | 1 | 42    | 0.00014 | 1    | U | K.EDLAAFVEELDKVESQER.E                             |
| <a href="#">9440</a>  | 1187 - 1204 | 1054.0143 | 2106.0141 | 2106.0117 | 1.15    | 1 | 60    | 3.4e-06 | 1    | U | K.EDLAAFVEELDKVESQER.E                             |
| <a href="#">9441</a>  | 1187 - 1204 | 1054.0146 | 2106.0146 | 2106.0117 | 1.42    | 1 | 64    | 1.7e-06 | 1    | U | K.EDLAAFVEELDKVESQER.E                             |
| <a href="#">11867</a> | 1187 - 1214 | 1032.1673 | 3093.4800 | 3093.4812 | -0.37   | 2 | 59    | 3.2e-05 | 1    | U | K.EDLAAFVEELDKVESQEREDVLGMSGK.A                    |
| <a href="#">11870</a> | 1187 - 1214 | 1032.1680 | 3093.4823 | 3093.4812 | 0.36    | 2 | 49    | 0.00011 | 1    | U | K.EDLAAFVEELDKVESQEREDVLGMSGK.A                    |
| <a href="#">11923</a> | 1187 - 1214 | 1037.4980 | 3109.4721 | 3109.4761 | -1.30   | 2 | 27    | 0.013   | 1    | U | K.EDLAAFVEELDKVESQEREDVLGMSGK.A<br>+ Oxidation (M) |
| <a href="#">11924</a> | 1187 - 1214 | 1037.4986 | 3109.4739 | 3109.4761 | -0.71   | 2 | 58    | 4.8e-05 | 1    | U | K.EDLAAFVEELDKVESQEREDVLGMSGK.A                    |

| Query                 | Start - End | Observed  | Mr (expt) | Mr (calc) | ppm     | M | Score | Expect  | Rank | U | Peptide                                            |
|-----------------------|-------------|-----------|-----------|-----------|---------|---|-------|---------|------|---|----------------------------------------------------|
| <a href="#">11931</a> | 1187 - 1214 | 1037.5003 | 3109.4790 | 3109.4761 | 0.94    | 2 | 32    | 0.0069  | 1    | U | K.EDLAAFVEELDKVESQEREDVLGMSGK.A<br>+ Oxidation (M) |
| <a href="#">7493</a>  | 1199 - 1214 | 867.9199  | 1733.8252 | 1733.8254 | -0.096  | 1 | 51    | 5.1e-05 | 1    | U | K.VESQEREDVLGMSGK.A                                |
| <a href="#">7602</a>  | 1199 - 1214 | 584.2804  | 1749.8194 | 1749.8203 | -0.52   | 1 | 30    | 0.011   | 1    | U | K.VESQEREDVLGMSGK.A<br>+ Oxidation (M)             |
| <a href="#">7603</a>  | 1199 - 1214 | 875.9179  | 1749.8213 | 1749.8203 | 0.57    | 1 | 65    | 2.4e-05 | 1    | U | K.VESQEREDVLGMSGK.A<br>+ Oxidation (M)             |
| <a href="#">1554</a>  | 1205 - 1214 | 503.7475  | 1005.4804 | 1005.4801 | 0.32    | 0 | 46    | 0.00031 | 1    | U | R.EDVLGMSGK.A                                      |
| <a href="#">1677</a>  | 1205 - 1214 | 511.7446  | 1021.4745 | 1021.4750 | -0.45   | 0 | 52    | 0.00015 | 1    | U | R.EDVLGMSGK.A<br>+ Oxidation (M)                   |
| <a href="#">1678</a>  | 1205 - 1214 | 511.7447  | 1021.4749 | 1021.4750 | -0.14   | 0 | 36    | 0.0038  | 1    | U | R.EDVLGMSGK.A<br>+ Oxidation (M)                   |
| <a href="#">1679</a>  | 1205 - 1214 | 511.7448  | 1021.4750 | 1021.4750 | -0.018  | 0 | 39    | 0.0021  | 1    | U | R.EDVLGMSGK.A<br>+ Oxidation (M)                   |
| <a href="#">1680</a>  | 1205 - 1214 | 511.7449  | 1021.4752 | 1021.4750 | 0.24    | 0 | 53    | 0.00011 | 1    | U | R.EDVLGMSGK.A<br>+ Oxidation (M)                   |
| <a href="#">1681</a>  | 1205 - 1214 | 511.7449  | 1021.4753 | 1021.4750 | 0.32    | 0 | 51    | 0.00016 | 1    | U | R.EDVLGMSGK.A<br>+ Oxidation (M)                   |
| <a href="#">1682</a>  | 1205 - 1214 | 511.7449  | 1021.4753 | 1021.4750 | 0.32    | 0 | 48    | 0.00033 | 1    | U | R.EDVLGMSGK.A<br>+ Oxidation (M)                   |
| <a href="#">1683</a>  | 1205 - 1214 | 511.7451  | 1021.4756 | 1021.4750 | 0.59    | 0 | 49    | 0.00028 | 1    | U | R.EDVLGMSGK.A<br>+ Oxidation (M)                   |
| <a href="#">6849</a>  | 1227 - 1240 | 824.9221  | 1647.8297 | 1647.8290 | 0.42    | 1 | 83    | 1.2e-07 | 1    | U | K.KLQLEETMPSYGR.R                                  |
| <a href="#">6934</a>  | 1227 - 1240 | 832.9184  | 1663.8223 | 1663.8239 | -0.95   | 1 | 76    | 4.1e-07 | 1    | U | K.KLQLEETMPSYGR.R<br>+ Oxidation (M)               |
| <a href="#">6935</a>  | 1227 - 1240 | 832.9186  | 1663.8227 | 1663.8239 | -0.76   | 1 | 71    | 1.6e-06 | 1    | U | K.KLQLEETMPSYGR.R<br>+ Oxidation (M)               |
| <a href="#">6937</a>  | 1227 - 1240 | 832.9187  | 1663.8229 | 1663.8239 | -0.60   | 1 | 68    | 9.2e-07 | 1    | U | K.KLQLEETMPSYGR.R<br>+ Oxidation (M)               |
| <a href="#">6938</a>  | 1227 - 1240 | 832.9188  | 1663.8230 | 1663.8239 | -0.57   | 1 | 58    | 1.2e-05 | 1    | U | K.KLQLEETMPSYGR.R<br>+ Oxidation (M)               |
| <a href="#">6939</a>  | 1227 - 1240 | 555.6149  | 1663.8230 | 1663.8239 | -0.56   | 1 | 18    | 0.036   | 1    | U | K.KLQLEETMPSYGR.R<br>+ Oxidation (M)               |
| <a href="#">6940</a>  | 1227 - 1240 | 555.6150  | 1663.8231 | 1663.8239 | -0.53   | 1 | 20    | 0.027   | 1    | U | K.KLQLEETMPSYGR.R<br>+ Oxidation (M)               |
| <a href="#">6941</a>  | 1227 - 1240 | 832.9190  | 1663.8234 | 1663.8239 | -0.34   | 1 | 71    | 5.5e-07 | 1    | U | K.KLQLEETMPSYGR.R<br>+ Oxidation (M)               |
| <a href="#">6942</a>  | 1227 - 1240 | 555.6152  | 1663.8239 | 1663.8239 | -0.022  | 1 | 29    | 0.007   | 1    | U | K.KLQLEETMPSYGR.R<br>+ Oxidation (M)               |
| <a href="#">6943</a>  | 1227 - 1240 | 555.6152  | 1663.8239 | 1663.8239 | -0.0042 | 1 | 27    | 0.013   | 1    | U | K.KLQLEETMPSYGR.R<br>+ Oxidation (M)               |
| <a href="#">6944</a>  | 1227 - 1240 | 832.9195  | 1663.8245 | 1663.8239 | 0.36    | 1 | 64    | 2.4e-06 | 1    | U | K.KLQLEETMPSYGR.R<br>+ Oxidation (M)               |
| <a href="#">6945</a>  | 1227 - 1240 | 832.9196  | 1663.8246 | 1663.8239 | 0.38    | 1 | 51    | 3.9e-05 | 1    | U | K.KLQLEETMPSYGR.R<br>+ Oxidation (M)               |
| <a href="#">6946</a>  | 1227 - 1240 | 832.9196  | 1663.8246 | 1663.8239 | 0.38    | 1 | 76    | 1.7e-07 | 1    | U | K.KLQLEETMPSYGR.R<br>+ Oxidation (M)               |
| <a href="#">6947</a>  | 1227 - 1240 | 555.6155  | 1663.8246 | 1663.8239 | 0.39    | 1 | 21    | 0.026   | 1    | U | K.KLQLEETMPSYGR.R<br>+ Oxidation (M)               |
| <a href="#">5769</a>  | 1228 - 1240 | 507.5854  | 1519.7343 | 1519.7341 | 0.15    | 0 | 31    | 0.011   | 1    | U | K.LQLEETMPSYGR.R                                   |
| <a href="#">5770</a>  | 1228 - 1240 | 760.8745  | 1519.7344 | 1519.7341 | 0.22    | 0 | 60    | 1.1e-05 | 1    | U | K.LQLEETMPSYGR.R                                   |
| <a href="#">5771</a>  | 1228 - 1240 | 760.8746  | 1519.7347 | 1519.7341 | 0.40    | 0 | 55    | 1.4e-05 | 1    | U | K.LQLEETMPSYGR.R                                   |
| <a href="#">5953</a>  | 1228 - 1240 | 768.8716  | 1535.7285 | 1535.7290 | -0.28   | 0 | 55    | 4e-05   | 1    | U | K.LQLEETMPSYGR.R<br>+ Oxidation (M)                |
| <a href="#">5954</a>  | 1228 - 1240 | 768.8717  | 1535.7288 | 1535.7290 | -0.13   | 0 | 61    | 3.7e-06 | 1    | U | K.LQLEETMPSYGR.R<br>+ Oxidation (M)                |
| <a href="#">5955</a>  | 1228 - 1240 | 768.8717  | 1535.7288 | 1535.7290 | -0.094  | 0 | 67    | 1.5e-06 | 1    | U | K.LQLEETMPSYGR.R<br>+ Oxidation (M)                |
| <a href="#">5956</a>  | 1228 - 1240 | 768.8717  | 1535.7289 | 1535.7290 | -0.068  | 0 | 69    | 2.1e-06 | 1    | U | K.LQLEETMPSYGR.R<br>+ Oxidation (M)                |
| <a href="#">5957</a>  | 1228 - 1240 | 768.8718  | 1535.7290 | 1535.7290 | 0.0098  | 0 | 57    | 1.6e-05 | 1    | U | K.LQLEETMPSYGR.R<br>+ Oxidation (M)                |
| <a href="#">5958</a>  | 1228 - 1240 | 768.8718  | 1535.7290 | 1535.7290 | 0.036   | 0 | 56    | 2.3e-05 | 1    | U | K.LQLEETMPSYGR.R<br>+ Oxidation (M)                |
| <a href="#">5959</a>  | 1228 - 1240 | 768.8718  | 1535.7290 | 1535.7290 | 0.049   | 0 | 43    | 0.00052 | 1    | U | K.LQLEETMPSYGR.R<br>+ Oxidation (M)                |
| <a href="#">2942</a>  | 1241 - 1250 | 586.3470  | 1170.6795 | 1170.6794 | 0.10    | 1 | 45    | 0.00043 | 1    | U | R.RIPEITAMK.A                                      |
| <a href="#">2943</a>  | 1241 - 1250 | 391.2339  | 1170.6798 | 1170.6794 | 0.35    | 1 | 37    | 0.00087 | 1    | U | R.RIPEITAMK.A                                      |
| <a href="#">3032</a>  | 1241 - 1250 | 594.3440  | 1186.6735 | 1186.6743 | -0.67   | 1 | 35    | 0.00065 | 1    | U | R.RIPEITAMK.A<br>+ Oxidation (M)                   |
| <a href="#">3033</a>  | 1241 - 1250 | 396.5652  | 1186.6737 | 1186.6743 | -0.59   | 1 | 32    | 0.0023  | 1    | U | R.RIPEITAMK.A<br>+ Oxidation (M)                   |
| <a href="#">3036</a>  | 1241 - 1250 | 594.3446  | 1186.6746 | 1186.6743 | 0.19    | 1 | 49    | 4e-05   | 1    | U | R.RIPEITAMK.A<br>+ Oxidation (M)                   |
| <a href="#">3037</a>  | 1241 - 1250 | 594.3446  | 1186.6747 | 1186.6743 | 0.27    | 1 | 38    | 0.00097 | 1    | U | R.RIPEITAMK.A<br>+ Oxidation (M)                   |
| <a href="#">3038</a>  | 1241 - 1250 | 594.3446  | 1186.6747 | 1186.6743 | 0.32    | 1 | 39    | 0.00051 | 1    | U | R.RIPEITAMK.A<br>+ Oxidation (M)                   |
| <a href="#">1632</a>  | 1242 - 1250 | 508.2957  | 1014.5769 | 1014.5783 | -1.43   | 0 | 21    | 0.03    | 1    | U | R.IIPEITAMK.A                                      |
| <a href="#">1638</a>  | 1242 - 1250 | 508.2965  | 1014.5785 | 1014.5783 | 0.16    | 0 | 27    | 0.047   | 1    | U | R.IIPEITAMK.A                                      |
| <a href="#">2719</a>  | 1261 - 1271 | 573.3298  | 1144.6451 | 1144.6452 | -0.021  | 2 | 66    | 1.4e-05 | 1    | U | K.KGDLDTAAVK.V                                     |
| <a href="#">1655</a>  | 1262 - 1271 | 509.2823  | 1016.5500 | 1016.5502 | -0.21   | 1 | 45    | 0.0019  | 1    | U | K.KGDLDTAAVK.V                                     |
| <a href="#">1656</a>  | 1262 - 1271 | 509.2823  | 1016.5501 | 1016.5502 | -0.13   | 1 | 43    | 0.0012  | 1    | U | K.KGDLDTAAVK.V                                     |
| <a href="#">1657</a>  | 1262 - 1271 | 509.2824  | 1016.5502 | 1016.5502 | -0.048  | 1 | 58    | 8.3e-05 | 1    | U | K.KGDLDTAAVK.V                                     |
| <a href="#">811</a>   | 1263 - 1271 | 445.2350  | 888.4554  | 888.4553  | 0.19    | 0 | 26    | 0.032   | 1    | U | K.GDLDTAAVK.V                                      |
| <a href="#">812</a>   | 1263 - 1271 | 445.2353  | 888.4560  | 888.4553  | 0.80    | 0 | 50    | 0.00057 | 1    | U | K.GDLDTAAVK.V                                      |
| <a href="#">11344</a> | 1272 - 1299 | 973.4681  | 2917.3824 | 2917.3869 | -1.56   | 0 | 25    | 0.018   | 1    | U | K.VEFDEEFGAPVEGAGEEALTPSPVINK.G                    |
| <a href="#">11347</a> | 1272 - 1299 | 973.4684  | 2917.3834 | 2917.3869 | -1.19   | 0 | 47    | 0.00031 | 1    | U | K.VEFDEEFGAPVEGAGEEALTPSPVINK.G                    |
| <a href="#">11348</a> | 1272 - 1299 | 973.4686  | 2917.3838 | 2917.3869 | -1.06   | 0 | 24    | 0.025   | 1    | U | K.VEFDEEFGAPVEGAGEEALTPSPVINK.G                    |
| <a href="#">11350</a> | 1272 - 1299 | 973.4690  | 2917.3852 | 2917.3869 | -0.59   | 0 | 29    | 0.011   | 1    | U | K.VEFDEEFGAPVEGAGEEALTPSPVINK.G                    |

| Query                 | Start - End | Observed  | Mr (expt) | Mr (calc) | ppm     | M | Score | Expect  | Rank | U | Peptide                                               |
|-----------------------|-------------|-----------|-----------|-----------|---------|---|-------|---------|------|---|-------------------------------------------------------|
| <a href="#">11351</a> | 1272 - 1299 | 973.4690  | 2917.3852 | 2917.3869 | -0.58   | 0 | 64    | 9.5e-06 | 1    | U | K.VEFDEEFGAPVEGAGEEALTPSPVINK.G                       |
| <a href="#">11352</a> | 1272 - 1299 | 973.4692  | 2917.3857 | 2917.3869 | -0.43   | 0 | 27    | 0.012   | 1    | U | K.VEFDEEFGAPVEGAGEEALTPSPVINK.G                       |
| <a href="#">11353</a> | 1272 - 1299 | 973.4692  | 2917.3859 | 2917.3869 | -0.36   | 0 | 35    | 0.0061  | 1    | U | K.VEFDEEFGAPVEGAGEEALTPSPVINK.G                       |
| <a href="#">11355</a> | 1272 - 1299 | 973.4693  | 2917.3862 | 2917.3869 | -0.24   | 0 | 55    | 5.4e-05 | 1    | U | K.VEFDEEFGAPVEGAGEEALTPSPVINK.G                       |
| <a href="#">11356</a> | 1272 - 1299 | 973.4694  | 2917.3863 | 2917.3869 | -0.20   | 0 | 30    | 0.013   | 1    | U | K.VEFDEEFGAPVEGAGEEALTPSPVINK.G                       |
| <a href="#">11359</a> | 1272 - 1299 | 973.4695  | 2917.3868 | 2917.3869 | -0.038  | 0 | 22    | 0.027   | 1    | U | K.VEFDEEFGAPVEGAGEEALTPSPVINK.G                       |
| <a href="#">11362</a> | 1272 - 1299 | 973.4698  | 2917.3877 | 2917.3869 | 0.27    | 0 | 50    | 0.00015 | 1    | U | K.VEFDEEFGAPVEGAGEEALTPSPVINK.G                       |
| <a href="#">11363</a> | 1272 - 1299 | 973.4699  | 2917.3878 | 2917.3869 | 0.32    | 0 | 19    | 0.033   | 1    | U | K.VEFDEEFGAPVEGAGEEALTPSPVINK.G                       |
| <a href="#">11364</a> | 1272 - 1299 | 973.4699  | 2917.3880 | 2917.3869 | 0.36    | 0 | 31    | 0.0048  | 1    | U | K.VEFDEEFGAPVEGAGEEALTPSPVINK.G                       |
| <a href="#">11366</a> | 1272 - 1299 | 973.4702  | 2917.3887 | 2917.3869 | 0.61    | 0 | 25    | 0.023   | 1    | U | K.VEFDEEFGAPVEGAGEEALTPSPVINK.G                       |
| <a href="#">11367</a> | 1272 - 1299 | 973.4702  | 2917.3887 | 2917.3869 | 0.62    | 0 | 33    | 0.0037  | 1    | U | K.VEFDEEFGAPVEGAGEEALTPSPVINK.G                       |
| <a href="#">11370</a> | 1272 - 1299 | 973.4705  | 2917.3896 | 2917.3869 | 0.93    | 0 | 51    | 0.00034 | 1    | U | K.VEFDEEFGAPVEGAGEEALTPSPVINK.G                       |
| <a href="#">11372</a> | 1272 - 1299 | 973.4708  | 2917.3905 | 2917.3869 | 1.24    | 0 | 22    | 0.045   | 1    | U | K.VEFDEEFGAPVEGAGEEALTPSPVINK.G                       |
| <a href="#">11373</a> | 1272 - 1299 | 730.3550  | 2917.3908 | 2917.3869 | 1.34    | 0 | 45    | 0.0066  | 1    | U | K.VEFDEEFGAPVEGAGEEALTPSPVINK.G                       |
| <a href="#">11375</a> | 1272 - 1299 | 973.4730  | 2917.3972 | 2917.3869 | 3.53    | 0 | 38    | 0.0014  | 1    | U | K.VEFDEEFGAPVEGAGEEALTPSPVINK.G                       |
| <a href="#">11653</a> | 1272 - 1299 | 1000.1234 | 2997.3484 | 2997.3532 | -1.62   | 0 | 40    | 0.00073 | 1    | U | K.VEFDEEFGAPVEGAGEEALTPSPVINK.G<br>+ Phospho (ST)     |
| <a href="#">11654</a> | 1272 - 1299 | 1000.1254 | 2997.3544 | 2997.3532 | 0.39    | 0 | 34    | 0.0049  | 1    | U | K.VEFDEEFGAPVEGAGEEALTPSPVINK.G<br>+ Phospho (ST)     |
| <a href="#">3053</a>  | 1316 - 1327 | 396.8908  | 1187.6507 | 1187.6510 | -0.27   | 1 | 20    | 0.049   | 1    | U | R.KTPTSSGKPSAK.K                                      |
| <a href="#">3054</a>  | 1316 - 1327 | 594.8327  | 1187.6509 | 1187.6510 | -0.083  | 1 | 60    | 2.5e-05 | 1    | U | R.KTPTSSGKPSAK.K                                      |
| <a href="#">3056</a>  | 1316 - 1327 | 396.8909  | 1187.6510 | 1187.6510 | -0.020  | 1 | 38    | 0.0018  | 1    | U | R.KTPTSSGKPSAK.K                                      |
| <a href="#">3060</a>  | 1316 - 1327 | 594.8331  | 1187.6516 | 1187.6510 | 0.54    | 1 | 48    | 0.00022 | 1    | U | R.KTPTSSGKPSAK.K                                      |
| <a href="#">1966</a>  | 1317 - 1327 | 530.7854  | 1059.5563 | 1059.5560 | 0.22    | 0 | 37    | 0.00096 | 1    | U | R.KTPTSSGKPSAK.K                                      |
| <a href="#">11335</a> | 1332 - 1356 | 972.1280  | 2913.3623 | 2913.3628 | -0.17   | 2 | 70    | 5.6e-07 | 1    | U | K.RNPWSDDESKSESLEETEPVVIIPR.D                         |
| <a href="#">11336</a> | 1332 - 1356 | 972.1282  | 2913.3628 | 2913.3628 | 0.013   | 2 | 76    | 3.2e-07 | 1    | U | K.RNPWSDDESKSESLEETEPVVIIPR.D                         |
| <a href="#">11337</a> | 1332 - 1356 | 729.3481  | 2913.3631 | 2913.3628 | 0.12    | 2 | 28    | 0.03    | 1    | U | K.RNPWSDDESKSESLEETEPVVIIPR.D                         |
| <a href="#">11644</a> | 1332 - 1356 | 998.7840  | 2993.3303 | 2993.3291 | 0.40    | 2 | 35    | 0.019   | 1    | U | K.RNPWSDDESKSESLEETEPVVIIPR.D<br>+ Phospho (ST)       |
| <a href="#">2104</a>  | 1333 - 1341 | 539.2277  | 1076.4408 | 1076.4411 | -0.27   | 0 | 40    | 0.0013  | 1    | U | R.NPWSDESK.S                                          |
| <a href="#">11079</a> | 1333 - 1356 | 920.0938  | 2757.2596 | 2757.2617 | -0.77   | 1 | 70    | 2.9e-06 | 1    | U | R.NPWSDESKSESLEETEPVVIIPR.D                           |
| <a href="#">11080</a> | 1333 - 1356 | 920.0943  | 2757.2610 | 2757.2617 | -0.23   | 1 | 34    | 0.0076  | 1    | U | R.NPWSDESKSESLEETEPVVIIPR.D                           |
| <a href="#">7239</a>  | 1342 - 1356 | 850.4230  | 1698.8314 | 1698.8312 | 0.15    | 0 | 77    | 1.8e-06 | 1    | U | K.SESDLEETEPVVIIPR.D                                  |
| <a href="#">151</a>   | 1363 - 1369 | 371.7140  | 741.4134  | 741.4133  | 0.17    | 0 | 34    | 0.0034  | 1    | U | R.AAAERPK.Y                                           |
| <a href="#">12205</a> | 1370 - 1396 | 1076.7360 | 3227.1861 | 3227.1858 | 0.090   | 0 | 46    | 0.00027 | 1    | U | K.YTFDFSEEDDDDDDDDDNNLEELK.V                          |
| <a href="#">12206</a> | 1370 - 1396 | 1076.7361 | 3227.1865 | 3227.1858 | 0.21    | 0 | 46    | 0.00022 | 1    | U | K.YTFDFSEEDDDDDDDDDNNLEELK.V                          |
| <a href="#">10279</a> | 1397 - 1418 | 805.0311  | 2412.0714 | 2412.0734 | -0.80   | 1 | 31    | 0.018   | 1    | U | K.VKASPITNDGEDEFVPSDGLDK.D<br>+ Phospho (ST)          |
| <a href="#">10280</a> | 1397 - 1418 | 805.0319  | 2412.0738 | 2412.0734 | 0.18    | 1 | 34    | 0.016   | 1    | U | K.VKASPITNDGEDEFVPSDGLDK.D<br>+ Phospho (ST)          |
| <a href="#">12585</a> | 1397 - 1427 | 860.1374  | 3436.5206 | 3436.5236 | -0.86   | 2 | 56    | 0.00021 | 1    | U | K.VKASPITNDGEDEFVPSDGLDKDEYTFSPGK.S<br>+ Phospho (ST) |
| <a href="#">12586</a> | 1397 - 1427 | 860.1376  | 3436.5211 | 3436.5236 | -0.71   | 2 | 36    | 0.0041  | 1    | U | K.VKASPITNDGEDEFVPSDGLDKDEYTFSPGK.S<br>+ Phospho (ST) |
| <a href="#">12587</a> | 1397 - 1427 | 1146.5146 | 3436.5219 | 3436.5236 | -0.47   | 2 | 69    | 1e-05   | 1    | U | K.VKASPITNDGEDEFVPSDGLDKDEYTFSPGK.S<br>+ Phospho (ST) |
| <a href="#">12588</a> | 1397 - 1427 | 860.1379  | 3436.5224 | 3436.5236 | -0.34   | 2 | 46    | 0.00089 | 1    | U | K.VKASPITNDGEDEFVPSDGLDKDEYTFSPGK.S<br>+ Phospho (ST) |
| <a href="#">12589</a> | 1397 - 1427 | 860.1379  | 3436.5226 | 3436.5236 | -0.29   | 2 | 64    | 8.2e-05 | 1    | U | K.VKASPITNDGEDEFVPSDGLDKDEYTFSPGK.S<br>+ Phospho (ST) |
| <a href="#">12590</a> | 1397 - 1427 | 860.1382  | 3436.5238 | 3436.5236 | 0.063   | 2 | 47    | 0.00046 | 1    | U | K.VKASPITNDGEDEFVPSDGLDKDEYTFSPGK.S<br>+ Phospho (ST) |
| <a href="#">12591</a> | 1397 - 1427 | 1146.5154 | 3436.5245 | 3436.5236 | 0.28    | 2 | 68    | 6.9e-06 | 1    | U | K.VKASPITNDGEDEFVPSDGLDKDEYTFSPGK.S<br>+ Phospho (ST) |
| <a href="#">12592</a> | 1397 - 1427 | 1146.5159 | 3436.5260 | 3436.5236 | 0.71    | 2 | 73    | 2.2e-06 | 1    | U | K.VKASPITNDGEDEFVPSDGLDKDEYTFSPGK.S<br>+ Phospho (ST) |
| <a href="#">9402</a>  | 1399 - 1418 | 1053.4787 | 2104.9428 | 2104.9437 | -0.41   | 0 | 66    | 1.1e-05 | 1    | U | K.ASPITNDGEDEFVPSDGLDK.D                              |
| <a href="#">11983</a> | 1399 - 1427 | 783.3557  | 3129.3937 | 3129.3939 | -0.065  | 1 | 47    | 0.00033 | 1    | U | K.ASPITNDGEDEFVPSDGLDKDEYTFSPGK.S                     |
| <a href="#">11985</a> | 1399 - 1427 | 1044.1392 | 3129.3958 | 3129.3939 | 0.61    | 1 | 85    | 2.6e-07 | 1    | U | K.ASPITNDGEDEFVPSDGLDKDEYTFSPGK.S                     |
| <a href="#">11986</a> | 1399 - 1427 | 1044.1395 | 3129.3966 | 3129.3939 | 0.86    | 1 | 78    | 5.3e-07 | 1    | U | K.ASPITNDGEDEFVPSDGLDKDEYTFSPGK.S                     |
| <a href="#">12167</a> | 1399 - 1427 | 1070.7929 | 3209.3568 | 3209.3602 | -1.04   | 1 | 66    | 2e-05   | 1    | U | K.ASPITNDGEDEFVPSDGLDKDEYTFSPGK.S<br>+ Phospho (ST)   |
| <a href="#">12168</a> | 1399 - 1427 | 1070.7939 | 3209.3598 | 3209.3602 | -0.13   | 1 | 75    | 1.3e-06 | 1    | U | K.ASPITNDGEDEFVPSDGLDKDEYTFSPGK.S<br>+ Phospho (ST)   |
| <a href="#">12169</a> | 1399 - 1427 | 1070.7946 | 3209.3619 | 3209.3602 | 0.54    | 1 | 45    | 0.0003  | 1    | U | K.ASPITNDGEDEFVPSDGLDKDEYTFSPGK.S<br>+ Phospho (ST)   |
| <a href="#">1815</a>  | 1419 - 1427 | 522.2376  | 1042.4605 | 1042.4607 | -0.18   | 0 | 36    | 0.00082 | 1    | U | K.DEYTFSPGK.S                                         |
| <a href="#">8988</a>  | 1440 - 1456 | 990.4784  | 1978.9423 | 1978.9425 | -0.11   | 1 | 78    | 1.5e-07 | 1    | U | K.KSQDFGNLFFSPYSQK.S                                  |
| <a href="#">8361</a>  | 1441 - 1456 | 926.4303  | 1850.8460 | 1850.8475 | -0.81   | 0 | 75    | 1.7e-07 | 1    | U | K.KSQDFGNLFFSPYSQK.S                                  |
| <a href="#">8362</a>  | 1441 - 1456 | 926.4307  | 1850.8468 | 1850.8475 | -0.37   | 0 | 91    | 5.7e-09 | 1    | U | K.KSQDFGNLFFSPYSQK.S                                  |
| <a href="#">8363</a>  | 1441 - 1456 | 926.4307  | 1850.8469 | 1850.8475 | -0.36   | 0 | 63    | 2.3e-06 | 1    | U | K.KSQDFGNLFFSPYSQK.S                                  |
| <a href="#">8364</a>  | 1441 - 1456 | 617.9563  | 1850.8471 | 1850.8475 | -0.23   | 0 | 30    | 0.0095  | 1    | U | K.KSQDFGNLFFSPYSQK.S                                  |
| <a href="#">8365</a>  | 1441 - 1456 | 926.4312  | 1850.8478 | 1850.8475 | 0.13    | 0 | 67    | 4.9e-07 | 1    | U | K.KSQDFGNLFFSPYSQK.S                                  |
| <a href="#">8366</a>  | 1441 - 1456 | 926.4312  | 1850.8478 | 1850.8475 | 0.14    | 0 | 84    | 1.3e-08 | 1    | U | K.KSQDFGNLFFSPYSQK.S                                  |
| <a href="#">8368</a>  | 1441 - 1456 | 926.4313  | 1850.8481 | 1850.8475 | 0.30    | 0 | 51    | 1.7e-05 | 1    | U | K.KSQDFGNLFFSPYSQK.S                                  |
| <a href="#">8370</a>  | 1441 - 1456 | 617.9568  | 1850.8487 | 1850.8475 | 0.61    | 0 | 51    | 0.00028 | 1    | U | K.KSQDFGNLFFSPYSQK.S                                  |
| <a href="#">8371</a>  | 1441 - 1456 | 926.4317  | 1850.8489 | 1850.8475 | 0.74    | 0 | 74    | 3.4e-07 | 1    | U | K.KSQDFGNLFFSPYSQK.S                                  |
| <a href="#">8372</a>  | 1441 - 1456 | 926.4318  | 1850.8490 | 1850.8475 | 0.81    | 0 | 62    | 7.9e-06 | 1    | U | K.KSQDFGNLFFSPYSQK.S                                  |
| <a href="#">8373</a>  | 1441 - 1456 | 926.4322  | 1850.8499 | 1850.8475 | 1.26    | 0 | 79    | 1e-07   | 1    | U | K.KSQDFGNLFFSPYSQK.S                                  |
| <a href="#">8374</a>  | 1441 - 1456 | 926.4328  | 1850.8511 | 1850.8475 | 1.94    | 0 | 82    | 6.3e-08 | 1    | U | K.KSQDFGNLFFSPYSQK.S                                  |
| <a href="#">8375</a>  | 1441 - 1456 | 926.4352  | 1850.8559 | 1850.8475 | 4.51    | 0 | 72    | 2.3e-07 | 1    | U | K.KSQDFGNLFFSPYSQK.S                                  |
| <a href="#">11116</a> | 1457 - 1482 | 932.4093  | 2794.2060 | 2794.2093 | -1.21   | 1 | 76    | 4.2e-07 | 1    | U | K.SEDDSAKFDSNEEDSASVFSPSFGLK.Q                        |
| <a href="#">11118</a> | 1457 - 1482 | 932.4095  | 2794.2066 | 2794.2093 | -1.00   | 1 | 53    | 6.5e-05 | 1    | U | K.SEDDSAKFDSNEEDSASVFSPSFGLK.Q                        |
| <a href="#">11119</a> | 1457 - 1482 | 932.4098  | 2794.2077 | 2794.2093 | -0.60   | 1 | 67    | 3.7e-06 | 1    | U | K.SEDDSAKFDSNEEDSASVFSPSFGLK.Q                        |
| <a href="#">11120</a> | 1457 - 1482 | 932.4104  | 2794.2093 | 2794.2093 | -0.0082 | 1 | 52    | 7.3e-05 | 1    | U | K.SEDDSAKFDSNEEDSASVFSPSFGLK.Q                        |
| <a href="#">11121</a> | 1457 - 1482 | 932.4117  | 2794.2133 | 2794.2093 | 1.41    | 1 | 62    | 4.9e-06 | 1    | U | K.SEDDSAKFDSNEEDSASVFSPSFGLK.Q                        |
| <a href="#">11266</a> | 1457 - 1482 | 959.0657  | 2874.1754 | 2874.1757 | -0.093  | 1 | 33    | 0.0075  | 1    | U | K.SEDDSAKFDSNEEDSASVFSPSFGLK.Q<br>+ Phospho (ST)      |
| <a href="#">11268</a> | 1457 - 1482 | 959.0661  | 2874.1765 | 2874.1757 | 0.30    | 1 | 38    | 0.0012  | 1    | U | K.SEDDSAKFDSNEEDSASVFSPSFGLK.Q<br>+ Phospho (ST)      |

| Query                | Start - End | Observed  | Mr (expt) | Mr (calc) | ppm    | M | Score | Expect  | Rank | U | Peptide                                   |
|----------------------|-------------|-----------|-----------|-----------|--------|---|-------|---------|------|---|-------------------------------------------|
| <a href="#">9245</a> | 1464 - 1482 | 1031.9640 | 2061.9133 | 2061.9167 | -1.64  | 0 | 18    | 0.029   | 1    | U | K.FDSNEEDSASVFSPSFGLK.Q                   |
| <a href="#">9246</a> | 1464 - 1482 | 1031.9642 | 2061.9138 | 2061.9167 | -1.41  | 0 | 83    | 3.6e-08 | 1    | U | K.FDSNEEDSASVFSPSFGLK.Q                   |
| <a href="#">9247</a> | 1464 - 1482 | 688.3126  | 2061.9159 | 2061.9167 | -0.41  | 0 | 39    | 0.0015  | 1    | U | K.FDSNEEDSASVFSPSFGLK.Q                   |
| <a href="#">9250</a> | 1464 - 1482 | 1031.9654 | 2061.9163 | 2061.9167 | -0.19  | 0 | 105   | 4.8e-10 | 1    | U | K.FDSNEEDSASVFSPSFGLK.Q                   |
| <a href="#">9251</a> | 1464 - 1482 | 1031.9655 | 2061.9165 | 2061.9167 | -0.099 | 0 | 96    | 5.8e-09 | 1    | U | K.FDSNEEDSASVFSPSFGLK.Q                   |
| <a href="#">9252</a> | 1464 - 1482 | 1031.9660 | 2061.9175 | 2061.9167 | 0.39   | 0 | 76    | 3.8e-07 | 1    | U | K.FDSNEEDSASVFSPSFGLK.Q                   |
| <a href="#">9253</a> | 1464 - 1482 | 1031.9661 | 2061.9176 | 2061.9167 | 0.42   | 0 | 110   | 1.6e-10 | 1    | U | K.FDSNEEDSASVFSPSFGLK.Q                   |
| <a href="#">9254</a> | 1464 - 1482 | 1031.9663 | 2061.9180 | 2061.9167 | 0.63   | 0 | 29    | 0.0066  | 1    | U | K.FDSNEEDSASVFSPSFGLK.Q                   |
| <a href="#">9255</a> | 1464 - 1482 | 1031.9665 | 2061.9184 | 2061.9167 | 0.81   | 0 | 44    | 0.00044 | 1    | U | K.FDSNEEDSASVFSPSFGLK.Q                   |
| <a href="#">9256</a> | 1464 - 1482 | 1031.9668 | 2061.9190 | 2061.9167 | 1.09   | 0 | 92    | 1.3e-08 | 1    | U | K.FDSNEEDSASVFSPSFGLK.Q                   |
| <a href="#">9257</a> | 1464 - 1482 | 688.3137  | 2061.9193 | 2061.9167 | 1.23   | 0 | 24    | 0.037   | 1    | U | K.FDSNEEDSASVFSPSFGLK.Q                   |
| <a href="#">9258</a> | 1464 - 1482 | 1031.9673 | 2061.9201 | 2061.9167 | 1.64   | 0 | 18    | 0.032   | 1    | U | K.FDSNEEDSASVFSPSFGLK.Q                   |
| <a href="#">9259</a> | 1464 - 1482 | 1031.9682 | 2061.9218 | 2061.9167 | 2.46   | 0 | 45    | 0.00036 | 1    | U | K.FDSNEEDSASVFSPSFGLK.Q                   |
| <a href="#">9260</a> | 1464 - 1482 | 1031.9695 | 2061.9245 | 2061.9167 | 3.76   | 0 | 60    | 7e-05   | 1    | U | K.FDSNEEDSASVFSPSFGLK.Q                   |
| <a href="#">9542</a> | 1464 - 1482 | 714.9676  | 2141.8809 | 2141.8831 | -1.02  | 0 | 30    | 0.008   | 1    | U | K.FDSNEEDSASVFSPSFGLK.Q<br>+ Phospho (ST) |
| <a href="#">9543</a> | 1464 - 1482 | 1071.9478 | 2141.8811 | 2141.8831 | -0.90  | 0 | 68    | 3e-06   | 1    | U | K.FDSNEEDSASVFSPSFGLK.Q<br>+ Phospho (ST) |
| <a href="#">9544</a> | 1464 - 1482 | 1071.9479 | 2141.8813 | 2141.8831 | -0.82  | 0 | 82    | 1.5e-07 | 1    | U | K.FDSNEEDSASVFSPSFGLK.Q<br>+ Phospho (ST) |
| <a href="#">9545</a> | 1464 - 1482 | 1071.9482 | 2141.8817 | 2141.8831 | -0.61  | 0 | 73    | 6.8e-07 | 1    | U | K.FDSNEEDSASVFSPSFGLK.Q<br>+ Phospho (ST) |
| <a href="#">9546</a> | 1464 - 1482 | 1071.9482 | 2141.8818 | 2141.8831 | -0.60  | 0 | 78    | 1.4e-06 | 1    | U | K.FDSNEEDSASVFSPSFGLK.Q<br>+ Phospho (ST) |
| <a href="#">9547</a> | 1464 - 1482 | 1071.9482 | 2141.8818 | 2141.8831 | -0.57  | 0 | 70    | 3.7e-06 | 1    | U | K.FDSNEEDSASVFSPSFGLK.Q<br>+ Phospho (ST) |
| <a href="#">9549</a> | 1464 - 1482 | 1071.9484 | 2141.8823 | 2141.8831 | -0.37  | 0 | 60    | 1.2e-05 | 1    | U | K.FDSNEEDSASVFSPSFGLK.Q<br>+ Phospho (ST) |
| <a href="#">9550</a> | 1464 - 1482 | 1071.9485 | 2141.8824 | 2141.8831 | -0.31  | 0 | 79    | 4.9e-07 | 1    | U | K.FDSNEEDSASVFSPSFGLK.Q<br>+ Phospho (ST) |
| <a href="#">9551</a> | 1464 - 1482 | 1071.9486 | 2141.8827 | 2141.8831 | -0.15  | 0 | 75    | 6.8e-07 | 1    | U | K.FDSNEEDSASVFSPSFGLK.Q<br>+ Phospho (ST) |
| <a href="#">9553</a> | 1464 - 1482 | 714.9683  | 2141.8831 | 2141.8831 | 0.021  | 0 | 49    | 9.3e-05 | 1    | U | K.FDSNEEDSASVFSPSFGLK.Q<br>+ Phospho (ST) |
| <a href="#">9554</a> | 1464 - 1482 | 714.9685  | 2141.8836 | 2141.8831 | 0.26   | 0 | 27    | 0.0064  | 1    | U | K.FDSNEEDSASVFSPSFGLK.Q<br>+ Phospho (ST) |
| <a href="#">9555</a> | 1464 - 1482 | 714.9688  | 2141.8845 | 2141.8831 | 0.69   | 0 | 29    | 0.0021  | 1    | U | K.FDSNEEDSASVFSPSFGLK.Q<br>+ Phospho (ST) |
| <a href="#">9556</a> | 1464 - 1482 | 714.9692  | 2141.8859 | 2141.8831 | 1.31   | 0 | 32    | 0.011   | 1    | U | K.FDSNEEDSASVFSPSFGLK.Q<br>+ Phospho (ST) |
| <a href="#">871</a>  | 1483 - 1490 | 451.7507  | 901.4868  | 901.4869  | -0.072 | 1 | 48    | 0.001   | 1    | U | K.QTDKVPK.T                               |
| <a href="#">4466</a> | 1496 - 1508 | 456.9330  | 1367.7771 | 1367.7773 | -0.10  | 1 | 18    | 0.034   | 1    | U | K.KGKPSDTPVKPK.R                          |
| <a href="#">4467</a> | 1496 - 1508 | 456.9330  | 1367.7773 | 1367.7773 | 0.051  | 1 | 46    | 0.00028 | 1    | U | K.KGKPSDTPVKPK.R                          |
| <a href="#">4468</a> | 1496 - 1508 | 684.8960  | 1367.7775 | 1367.7773 | 0.17   | 1 | 64    | 1e-05   | 1    | U | K.KGKPSDTPVKPK.R                          |
| <a href="#">5040</a> | 1496 - 1508 | 483.5888  | 1447.7447 | 1447.7436 | 0.77   | 1 | 23    | 0.043   | 1    | U | K.KGKPSDTPVKPK.R<br>+ Phospho (ST)        |
| <a href="#">3451</a> | 1497 - 1508 | 414.2343  | 1239.6811 | 1239.6823 | -0.94  | 0 | 29    | 0.0099  | 1    | U | K.GKPSDTPVKPK.R                           |
| <a href="#">3455</a> | 1497 - 1508 | 414.2346  | 1239.6821 | 1239.6823 | -0.19  | 0 | 41    | 0.0018  | 1    | U | K.GKPSDTPVKPK.R                           |
| <a href="#">3457</a> | 1497 - 1508 | 620.8489  | 1239.6832 | 1239.6823 | 0.77   | 0 | 44    | 0.00016 | 1    | U | K.GKPSDTPVKPK.R                           |
| <a href="#">3458</a> | 1497 - 1508 | 414.2358  | 1239.6856 | 1239.6823 | 2.67   | 0 | 32    | 0.0084  | 1    | U | K.GKPSDTPVKPK.R                           |
| <a href="#">4122</a> | 1497 - 1508 | 440.8899  | 1319.6478 | 1319.6486 | -0.66  | 0 | 24    | 0.04    | 1    | U | K.GKPSDTPVKPK.R<br>+ Phospho (ST)         |
| <a href="#">8750</a> | 1515 - 1532 | 960.9809  | 1919.9472 | 1919.9476 | -0.24  | 1 | 103   | 2.8e-10 | 1    | U | K.KVVEAVNSDSDSEFGIPK.K                    |
| <a href="#">8751</a> | 1515 - 1532 | 640.9897  | 1919.9473 | 1919.9476 | -0.19  | 1 | 61    | 1.6e-05 | 1    | U | K.KVVEAVNSDSDSEFGIPK.K                    |
| <a href="#">8753</a> | 1515 - 1532 | 960.9813  | 1919.9480 | 1919.9476 | 0.20   | 1 | 68    | 6.5e-07 | 1    | U | K.KVVEAVNSDSDSEFGIPK.K                    |
| <a href="#">9042</a> | 1515 - 1532 | 667.6454  | 1999.9144 | 1999.9140 | 0.21   | 1 | 31    | 0.0056  | 1    | U | K.KVVEAVNSDSDSEFGIPK.K<br>+ Phospho (ST)  |
| <a href="#">9043</a> | 1515 - 1532 | 1000.9645 | 1999.9144 | 1999.9140 | 0.24   | 1 | 84    | 1.9e-07 | 1    | U | K.KVVEAVNSDSDSEFGIPK.K<br>+ Phospho (ST)  |
| <a href="#">9044</a> | 1515 - 1532 | 1000.9646 | 1999.9146 | 1999.9140 | 0.31   | 1 | 56    | 0.00012 | 1    | U | K.KVVEAVNSDSDSEFGIPK.K<br>+ Phospho (ST)  |
| <a href="#">9045</a> | 1515 - 1532 | 1000.9646 | 1999.9146 | 1999.9140 | 0.31   | 1 | 75    | 9.9e-07 | 1    | U | K.KVVEAVNSDSDSEFGIPK.K<br>+ Phospho (ST)  |
| <a href="#">9046</a> | 1515 - 1532 | 1000.9650 | 1999.9155 | 1999.9140 | 0.76   | 1 | 45    | 0.00056 | 1    | U | K.KVVEAVNSDSDSEFGIPK.K<br>+ Phospho (ST)  |
| <a href="#">9047</a> | 1515 - 1532 | 667.6459  | 1999.9158 | 1999.9140 | 0.93   | 1 | 50    | 0.0014  | 1    | U | K.KVVEAVNSDSDSEFGIPK.K<br>+ Phospho (ST)  |
| <a href="#">7907</a> | 1516 - 1532 | 598.2916  | 1791.8531 | 1791.8527 | 0.23   | 0 | 20    | 0.044   | 1    | U | K.VVEAVNSDSDSEFGIPK.K                     |
| <a href="#">7908</a> | 1516 - 1532 | 896.9338  | 1791.8531 | 1791.8527 | 0.26   | 0 | 67    | 6.8e-07 | 1    | U | K.VVEAVNSDSDSEFGIPK.K                     |
| <a href="#">7909</a> | 1516 - 1532 | 896.9355  | 1791.8565 | 1791.8527 | 2.12   | 0 | 50    | 0.00016 | 1    | U | K.VVEAVNSDSDSEFGIPK.K                     |
| <a href="#">8463</a> | 1516 - 1532 | 936.9157  | 1871.8168 | 1871.8190 | -1.16  | 0 | 52    | 2.3e-05 | 1    | U | K.VVEAVNSDSDSEFGIPK.K<br>+ Phospho (ST)   |
| <a href="#">8464</a> | 1516 - 1532 | 936.9162  | 1871.8179 | 1871.8190 | -0.56  | 0 | 74    | 7.2e-07 | 1    | U | K.VVEAVNSDSDSEFGIPK.K<br>+ Phospho (ST)   |
| <a href="#">8465</a> | 1516 - 1532 | 936.9169  | 1871.8192 | 1871.8190 | 0.090  | 0 | 58    | 6.1e-06 | 1    | U | K.VVEAVNSDSDSEFGIPK.K<br>+ Phospho (ST)   |
| <a href="#">8144</a> | 1547 - 1562 | 606.2566  | 1815.7478 | 1815.7537 | -3.22  | 2 | 28    | 0.029   | 1    | U | K.RKASGSENEGDPYNGR.K<br>+ Phospho (ST)    |
| <a href="#">8145</a> | 1547 - 1562 | 606.2589  | 1815.7550 | 1815.7537 | 0.71   | 2 | 47    | 0.0023  | 1    | U | K.RKASGSENEGDPYNGR.K<br>+ Phospho (ST)    |
| <a href="#">6355</a> | 1548 - 1562 | 527.5690  | 1579.6851 | 1579.6862 | -0.70  | 1 | 38    | 0.013   | 1    | U | R.KASGSENEGDPYNGR.K                       |
| <a href="#">6356</a> | 1548 - 1562 | 527.5691  | 1579.6854 | 1579.6862 | -0.57  | 1 | 47    | 0.00039 | 1    | U | R.KASGSENEGDPYNGR.K                       |
| <a href="#">6357</a> | 1548 - 1562 | 790.8502  | 1579.6858 | 1579.6862 | -0.30  | 1 | 35    | 0.00055 | 1    | U | R.KASGSENEGDPYNGR.K                       |
| <a href="#">6359</a> | 1548 - 1562 | 527.5695  | 1579.6866 | 1579.6862 | 0.23   | 1 | 33    | 0.0049  | 1    | U | R.KASGSENEGDPYNGR.K                       |
| <a href="#">6914</a> | 1548 - 1562 | 554.2244  | 1659.6515 | 1659.6526 | -0.63  | 1 | 28    | 0.029   | 1    | U | R.KASGSENEGDPYNGR.K<br>+ Phospho (ST)     |
| <a href="#">6915</a> | 1548 - 1562 | 554.2250  | 1659.6532 | 1659.6526 | 0.36   | 1 | 35    | 0.0032  | 1    | U | R.KASGSENEGDPYNGR.K<br>+ Phospho (ST)     |
| <a href="#">6916</a> | 1548 - 1562 | 830.8339  | 1659.6533 | 1659.6526 | 0.44   | 1 | 40    | 0.00052 | 1    | U | R.KASGSENEGDPYNGR.K<br>+ Phospho (ST)     |
| <a href="#">7528</a> | 1548 - 1562 | 870.8175  | 1739.6205 | 1739.6189 | 0.90   | 1 | 39    | 0.0031  | 1    | U | R.KASGSENEGDPYNGR.K                       |

| Query                 | Start - End | Observed  | Mr (expt) | Mr (calc) | ppm     | M | Score | Expect  | Rank | U | Peptide                                 |
|-----------------------|-------------|-----------|-----------|-----------|---------|---|-------|---------|------|---|-----------------------------------------|
|                       |             |           |           |           |         |   |       |         |      |   | + 2 Phospho (ST)                        |
| <a href="#">7287</a>  | 1548 - 1563 | 570.2676  | 1707.7810 | 1707.7812 | -0.12   | 2 | 54    | 3.4e-05 | 1    | U | R.KASGSENEGDPNPRK.T                     |
| <a href="#">7850</a>  | 1548 - 1563 | 596.9232  | 1787.7477 | 1787.7475 | 0.10    | 2 | 38    | 0.00076 | 1    | U | R.KASGSENEGDPNPRK.T<br>+ Phospho (ST)   |
| <a href="#">5069</a>  | 1549 - 1562 | 726.8021  | 1451.5896 | 1451.5913 | -1.15   | 0 | 47    | 0.00091 | 1    | U | K.ASGSENEGDPNPRK.K                      |
| <a href="#">5070</a>  | 1549 - 1562 | 726.8026  | 1451.5907 | 1451.5913 | -0.42   | 0 | 45    | 0.00048 | 1    | U | K.ASGSENEGDPNPRK.K                      |
| <a href="#">5072</a>  | 1549 - 1562 | 726.8030  | 1451.5914 | 1451.5913 | 0.093   | 0 | 29    | 0.016   | 1    | U | K.ASGSENEGDPNPRK.K                      |
| <a href="#">5073</a>  | 1549 - 1562 | 484.8711  | 1451.5915 | 1451.5913 | 0.16    | 0 | 38    | 0.0034  | 1    | U | K.ASGSENEGDPNPRK.K                      |
| <a href="#">5074</a>  | 1549 - 1562 | 726.8031  | 1451.5917 | 1451.5913 | 0.26    | 0 | 46    | 8.2e-05 | 1    | U | K.ASGSENEGDPNPRK.K                      |
| <a href="#">5075</a>  | 1549 - 1562 | 726.8037  | 1451.5928 | 1451.5913 | 1.02    | 0 | 27    | 0.0088  | 1    | U | K.ASGSENEGDPNPRK.K                      |
| <a href="#">5076</a>  | 1549 - 1562 | 726.8037  | 1451.5928 | 1451.5913 | 1.07    | 0 | 32    | 0.0047  | 1    | U | K.ASGSENEGDPNPRK.K                      |
| <a href="#">5926</a>  | 1549 - 1562 | 766.7857  | 1531.5568 | 1531.5576 | -0.50   | 0 | 26    | 0.012   | 1    | U | K.ASGSENEGDPNPRK.K<br>+ Phospho (ST)    |
| <a href="#">5927</a>  | 1549 - 1562 | 766.7857  | 1531.5569 | 1531.5576 | -0.46   | 0 | 58    | 2.3e-05 | 1    | U | K.ASGSENEGDPNPRK.K<br>+ Phospho (ST)    |
| <a href="#">5928</a>  | 1549 - 1562 | 766.7864  | 1531.5582 | 1531.5576 | 0.37    | 0 | 49    | 0.00015 | 1    | U | K.ASGSENEGDPNPRK.K<br>+ Phospho (ST)    |
| <a href="#">6358</a>  | 1549 - 1563 | 790.8505  | 1579.6864 | 1579.6862 | 0.088   | 1 | 80    | 3.5e-07 | 1    | U | K.ASGSENEGDPNPRK.T                      |
| <a href="#">6917</a>  | 1549 - 1563 | 830.8340  | 1659.6534 | 1659.6526 | 0.50    | 1 | 49    | 0.00031 | 1    | U | K.ASGSENEGDPNPRK.T<br>+ Phospho (ST)    |
| <a href="#">11426</a> | 1574 - 1599 | 588.2806  | 2936.3664 | 2936.3716 | -1.77   | 1 | 38    | 0.0037  | 1    | U | K.KTSFDQSDVDIFPSDFPTEPPSLPR.T           |
| <a href="#">11427</a> | 1574 - 1599 | 979.7965  | 2936.3676 | 2936.3716 | -1.39   | 1 | 35    | 0.0052  | 1    | U | K.KTSFDQSDVDIFPSDFPTEPPSLPR.T           |
| <a href="#">11428</a> | 1574 - 1599 | 979.7966  | 2936.3678 | 2936.3716 | -1.30   | 1 | 31    | 0.019   | 1    | U | K.KTSFDQSDVDIFPSDFPTEPPSLPR.T           |
| <a href="#">11432</a> | 1574 - 1599 | 979.7971  | 2936.3695 | 2936.3716 | -0.73   | 1 | 32    | 0.014   | 1    | U | K.KTSFDQSDVDIFPSDFPTEPPSLPR.T           |
| <a href="#">11438</a> | 1574 - 1599 | 979.7977  | 2936.3713 | 2936.3716 | -0.11   | 1 | 38    | 0.01    | 1    | U | K.KTSFDQSDVDIFPSDFPTEPPSLPR.T           |
| <a href="#">11439</a> | 1574 - 1599 | 588.2816  | 2936.3716 | 2936.3716 | -0.0027 | 1 | 38    | 0.0022  | 1    | U | K.KTSFDQSDVDIFPSDFPTEPPSLPR.T           |
| <a href="#">11441</a> | 1574 - 1599 | 979.7980  | 2936.3722 | 2936.3716 | 0.19    | 1 | 46    | 0.00037 | 1    | U | K.KTSFDQSDVDIFPSDFPTEPPSLPR.T           |
| <a href="#">11157</a> | 1575 - 1599 | 937.0993  | 2808.2761 | 2808.2767 | -0.20   | 0 | 31    | 0.0074  | 1    | U | K.TSFDQSDVDIFPSDFPTEPPSLPR.T            |
| <a href="#">11159</a> | 1575 - 1599 | 937.0996  | 2808.2770 | 2808.2767 | 0.11    | 0 | 37    | 0.0049  | 1    | U | K.TSFDQSDVDIFPSDFPTEPPSLPR.T            |
| <a href="#">9643</a>  | 1609 - 1626 | 1086.9145 | 2171.8144 | 2171.8154 | -0.44   | 0 | 23    | 0.028   | 1    | U | K.YFAESDEEDDVFAMFN.-                    |
| <a href="#">9644</a>  | 1609 - 1626 | 1086.9146 | 2171.8147 | 2171.8154 | -0.31   | 0 | 51    | 5.6e-05 | 1    | U | K.YFAESDEEDDVFAMFN.-                    |
| <a href="#">9689</a>  | 1609 - 1626 | 1094.9100 | 2187.8055 | 2187.8103 | -2.18   | 0 | 47    | 4.4e-05 | 1    | U | K.YFAESDEEDDVFAMFN.-<br>+ Oxidation (M) |
| <a href="#">9690</a>  | 1609 - 1626 | 1094.9104 | 2187.8062 | 2187.8103 | -1.87   | 0 | 34    | 0.0011  | 1    | U | K.YFAESDEEDDVFAMFN.-<br>+ Oxidation (M) |
| <a href="#">9691</a>  | 1609 - 1626 | 1094.9116 | 2187.8087 | 2187.8103 | -0.73   | 0 | 48    | 3.2e-05 | 1    | U | K.YFAESDEEDDVFAMFN.-<br>+ Oxidation (M) |
| <a href="#">9692</a>  | 1609 - 1626 | 1094.9117 | 2187.8088 | 2187.8103 | -0.65   | 0 | 33    | 0.0016  | 1    | U | K.YFAESDEEDDVFAMFN.-<br>+ Oxidation (M) |
| <a href="#">9694</a>  | 1609 - 1626 | 1094.9122 | 2187.8098 | 2187.8103 | -0.22   | 0 | 30    | 0.0017  | 1    | U | K.YFAESDEEDDVFAMFN.-<br>+ Oxidation (M) |
| <a href="#">9695</a>  | 1609 - 1626 | 1094.9122 | 2187.8099 | 2187.8103 | -0.16   | 0 | 42    | 0.00021 | 1    | U | K.YFAESDEEDDVFAMFN.-<br>+ Oxidation (M) |
| <a href="#">9696</a>  | 1609 - 1626 | 1094.9128 | 2187.8111 | 2187.8103 | 0.36    | 0 | 31    | 0.0042  | 1    | U | K.YFAESDEEDDVFAMFN.-<br>+ Oxidation (M) |

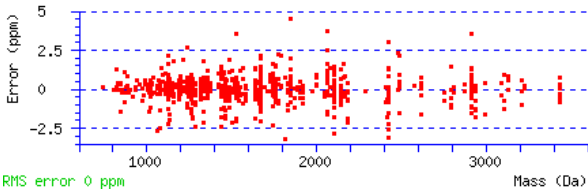

|  |
|--|
|  |
|--|
