# Supplementary material for: ERK2-topoisomerase II regulatory axis is important for gene activation in immediate early genes
Source: Springer Nature journal article supplement (doi:10.1038/s41467-023-44089-y), 2023-12-14
Supplement: 41467_2023_44089_MOESM9_ESM.pdf [file 41467_2023_44089_MOESM9_ESM.pdf]

# Erk1\_S1336, S1340, S1344

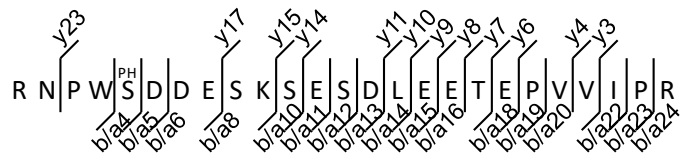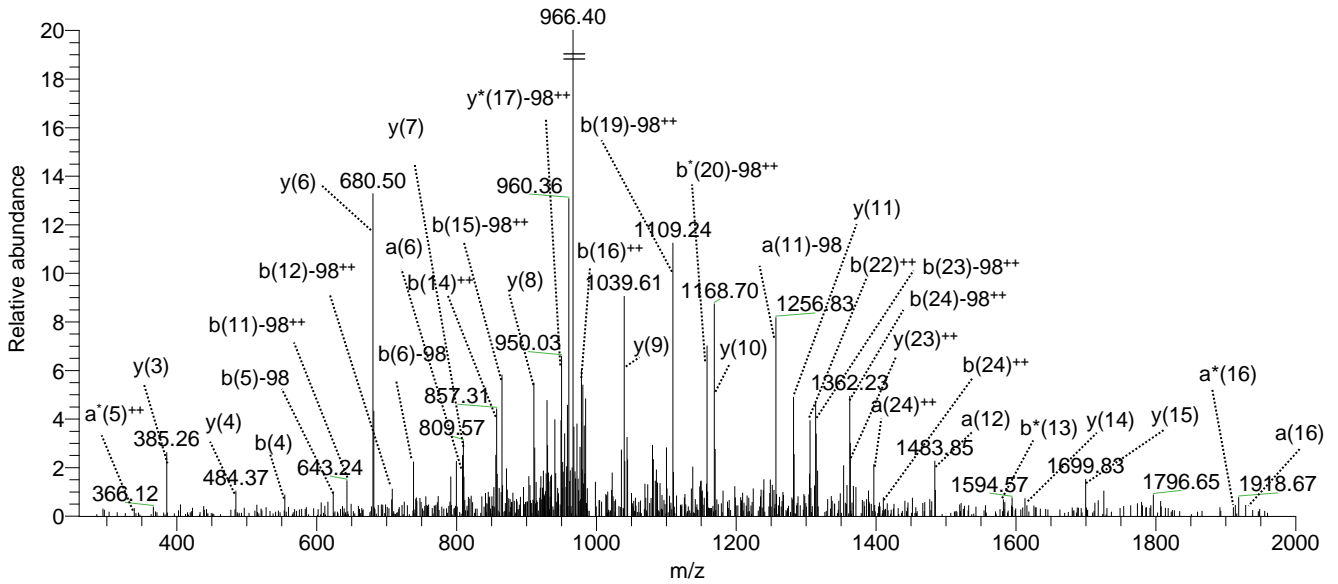

Match to Query 12003: 2993.331402 from(998.784410,3+) intensity(19394.5762) rtinseconds(2576) rawfile(SN221363\_deTOP2B\_Erk1\_1ul.raw) scans(8614) index(6914)

**Monoisotopic mass of neutral peptide Mr(calc):** 2993.3291

**Fixed modifications:** Carbamidomethyl (C) (apply to specified residues or termini only)

**Variable modifications:** S5 : Phospho (ST), with neutral losses 97.9769(shown in table), 0.0000

**Ions Score:** 52 **Expect:** 0.00025 **Matches :** 74/464 fragment ions using 85 most intense peaks

| #  | a       | a <sup>++</sup> | a <sup>*</sup> | a <sup>+++</sup> | b       | b <sup>++</sup> | b <sup>*</sup> | b <sup>+++</sup> | Seq. | y       | y <sup>++</sup> | y <sup>*</sup> | y <sup>+++</sup> | #  |
|----|---------|-----------------|----------------|------------------|---------|-----------------|----------------|------------------|------|---------|-----------------|----------------|------------------|----|
| 1  | 129.11  | 65.06           | 112.09         | 56.55            | 157.11  | 79.06           | 140.08         | 70.54            | R    |         |                 |                |                  | 25 |
| 2  | 243.16  | 122.08          | 226.13         | 113.57           | 271.15  | 136.08          | 254.12         | 127.57           | N    | 2740.26 | 1370.63         | 2723.23        | 1362.12          | 24 |
| 3  | 340.21  | 170.61          | 323.18         | 162.09           | 368.20  | 184.61          | 351.18         | 176.09           | P    | 2626.22 | 1313.61         | 2609.19        | 1305.10          | 23 |
| 4  | 526.29  | 263.65          | 509.26         | 255.13           | 554.28  | 277.65          | 537.26         | 269.13           | W    | 2529.16 | 1265.09         | 2512.14        | 1256.57          | 22 |
| 5  | 595.31  | 298.16          | 578.28         | 289.65           | 623.30  | 312.16          | 606.28         | 303.64           | S    | 2343.08 | 1172.05         | 2326.06        | 1163.53          | 21 |
| 6  | 710.34  | 355.67          | 693.31         | 347.16           | 738.33  | 369.67          | 721.31         | 361.16           | D    | 2274.06 | 1137.53         | 2257.04        | 1129.02          | 20 |
| 7  | 825.36  | 413.19          | 808.34         | 404.67           | 853.36  | 427.18          | 836.33         | 418.67           | D    | 2159.04 | 1080.02         | 2142.01        | 1071.51          | 19 |
| 8  | 954.41  | 477.71          | 937.38         | 469.19           | 982.40  | 491.70          | 965.37         | 483.19           | E    | 2044.01 | 1022.51         | 2026.98        | 1013.99          | 18 |
| 9  | 1041.44 | 521.22          | 1024.41        | 512.71           | 1069.43 | 535.22          | 1052.41        | 526.71           | S    | 1914.97 | 957.99          | 1897.94        | 949.47           | 17 |
| 10 | 1169.53 | 585.27          | 1152.51        | 576.76           | 1197.53 | 599.27          | 1180.50        | 590.75           | K    | 1827.93 | 914.47          | 1810.91        | 905.96           | 16 |
| 11 | 1256.57 | 628.79          | 1239.54        | 620.27           | 1284.56 | 642.78          | 1267.53        | 634.27           | S    | 1699.84 | 850.42          | 1682.81        | 841.91           | 15 |
| 12 | 1385.61 | 693.31          | 1368.58        | 684.79           | 1413.60 | 707.31          | 1396.58        | 698.79           | E    | 1612.81 | 806.91          | 1595.78        | 798.39           | 14 |
| 13 | 1472.64 | 736.82          | 1455.61        | 728.31           | 1500.64 | 750.82          | 1483.61        | 742.31           | S    | 1483.76 | 742.39          | 1466.74        | 733.87           | 13 |
| 14 | 1587.67 | 794.34          | 1570.64        | 785.82           | 1615.66 | 808.33          | 1598.64        | 799.82           | D    | 1396.73 | 698.87          | 1379.71        | 690.36           | 12 |
| 15 | 1700.75 | 850.88          | 1683.72        | 842.37           | 1728.75 | 864.88          | 1711.72        | 856.36           | L    | 1281.70 | 641.36          | 1264.68        | 632.84           | 11 |
| 16 | 1829.79 | 915.40          | 1812.77        | 906.89           | 1857.79 | 929.40          | 1840.76        | 920.88           | E    | 1168.62 | 584.81          | 1151.59        | 576.30           | 10 |
| 17 | 1958.84 | 979.92          | 1941.81        | 971.41           | 1986.83 | 993.92          | 1969.80        | 985.41           | E    | 1039.58 | 520.29          | 1022.55        | 511.78           | 9  |
| 18 | 2059.88 | 1030.45         | 2042.86        | 1021.93          | 2087.88 | 1044.44         | 2070.85        | 1035.93          | T    | 910.54  | 455.77          | 893.51         | 447.26           | 8  |
| 19 | 2188.93 | 1094.97         | 2171.90        | 1086.45          | 2216.92 | 1108.96         | 2199.89        | 1100.45          | E    | 809.49  | 405.25          | 792.46         | 396.73           | 7  |
| 20 | 2285.98 | 1143.49         | 2268.95        | 1134.98          | 2313.97 | 1157.49         | 2296.95        | 1148.98          | P    | 680.45  | 340.73          | 663.42         | 332.21           | 6  |
| 21 | 2385.05 | 1193.03         | 2368.02        | 1184.51          | 2413.04 | 1207.02         | 2396.02        | 1198.51          | V    | 583.39  | 292.20          | 566.37         | 283.69           | 5  |
| 22 | 2484.12 | 1242.56         | 2467.09        | 1234.05          | 2512.11 | 1256.56         | 2495.08        | 1248.05          | V    | 484.32  | 242.67          | 467.30         | 234.15           | 4  |
| 23 | 2597.20 | 1299.10         | 2580.17        | 1290.59          | 2625.20 | 1313.10         | 2608.17        | 1304.59          | I    | 385.26  | 193.13          | 368.23         | 184.62           | 3  |
| 24 | 2694.25 | 1347.63         | 2677.23        | 1339.12          | 2722.25 | 1361.63         | 2705.22        | 1353.11          | P    | 272.17  | 136.59          | 255.15         | 128.08           | 2  |
| 25 |         |                 |                |                  |         |                 |                |                  | R    | 175.12  | 88.06           | 158.09         | 79.55            | 1  |

## All matches to this query

| Score | Mr(calc) | Delta  | Site Analysis     |
|-------|----------|--------|-------------------|
| 52.4  | 2993.329 | 0.0023 | Phospho S5 82.30% |
| 44.9  | 2993.329 | 0.0023 | Phospho S9 14.60% |
| 37.6  | 2993.329 | 0.0023 | Phospho S11 2.71% |
| 29.1  | 2993.329 | 0.0023 | Phospho S13 0.38% |
| 6.9   | 2993.329 | 0.0023 | Phospho T18 0.00% |

# Erk1\_S1336, S1340, S1344

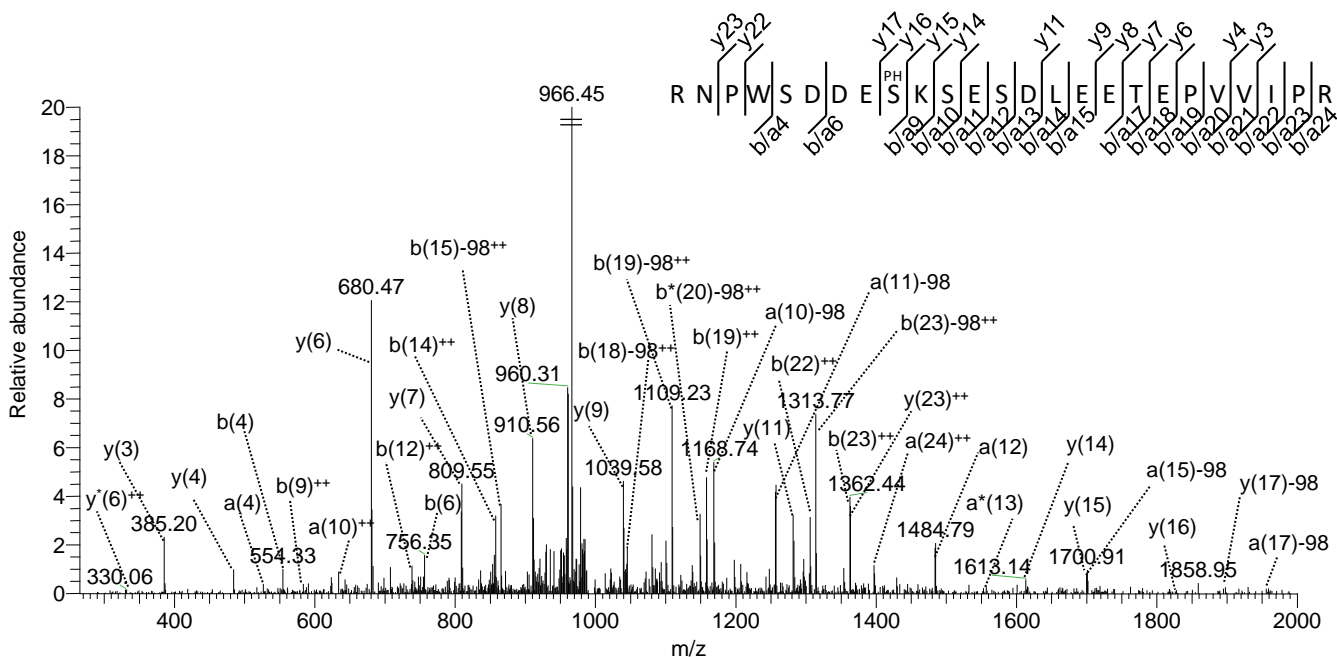

Match to Query 12001: 2993.325072 from(998.782300,3+) intensity(15240.2246) rtinseconds(2551) rawfile(SN221363\_deTOP2B\_Erk1\_1ul.raw) scans(8507) index(6815)

**Monoisotopic mass of neutral peptide Mr(calc):** 2993.3291

**Fixed modifications:** Carbamidomethyl (C) (apply to specified residues or termini only)

**Variable modifications:** S9 : Phospho (ST), with neutral losses 97.9769(shown in table), 0.0000

**Ions Score:** 67 **Expect:** 4.3e-06 **Matches :** 59/448 fragment ions using 68 most intense peaks

| #  | a       | a <sup>++</sup> | a <sup>*</sup> | a <sup>+++</sup> | b       | b <sup>++</sup> | b <sup>*</sup> | b <sup>+++</sup> | Seq. | y       | y <sup>++</sup> | y <sup>*</sup> | y <sup>+++</sup> | #  |
|----|---------|-----------------|----------------|------------------|---------|-----------------|----------------|------------------|------|---------|-----------------|----------------|------------------|----|
| 1  | 129.11  | 65.06           | 112.09         | 56.55            | 157.11  | 79.06           | 140.08         | 70.54            | R    |         |                 |                |                  | 25 |
| 2  | 243.16  | 122.08          | 226.13         | 113.57           | 271.15  | 136.08          | 254.12         | 127.57           | N    | 2740.26 | 1370.63         | 2723.23        | 1362.12          | 24 |
| 3  | 340.21  | 170.61          | 323.18         | 162.09           | 368.20  | 184.61          | 351.18         | 176.09           | P    | 2626.22 | 1313.61         | 2609.19        | 1305.10          | 23 |
| 4  | 526.29  | 263.65          | 509.26         | 255.13           | 554.28  | 277.65          | 537.26         | 269.13           | W    | 2529.16 | 1265.09         | 2512.14        | 1256.57          | 22 |
| 5  | 613.32  | 307.16          | 596.29         | 298.65           | 641.32  | 321.16          | 624.29         | 312.65           | S    | 2343.08 | 1172.05         | 2326.06        | 1163.53          | 21 |
| 6  | 728.35  | 364.68          | 711.32         | 356.16           | 756.34  | 378.67          | 739.32         | 370.16           | D    | 2256.05 | 1128.53         | 2239.02        | 1120.02          | 20 |
| 7  | 843.37  | 422.19          | 826.35         | 413.68           | 871.37  | 436.19          | 854.34         | 427.68           | D    | 2141.02 | 1071.02         | 2124.00        | 1062.50          | 19 |
| 8  | 972.42  | 486.71          | 955.39         | 478.20           | 1000.41 | 500.71          | 983.39         | 492.20           | E    | 2026.00 | 1013.50         | 2008.97        | 1004.99          | 18 |
| 9  | 1041.44 | 521.22          | 1024.41        | 512.71           | 1069.43 | 535.22          | 1052.41        | 526.71           | S    | 1896.95 | 948.98          | 1879.93        | 940.47           | 17 |
| 10 | 1169.53 | 585.27          | 1152.51        | 576.76           | 1197.53 | 599.27          | 1180.50        | 590.75           | K    | 1827.93 | 914.47          | 1810.91        | 905.96           | 16 |
| 11 | 1256.57 | 628.79          | 1239.54        | 620.27           | 1284.56 | 642.78          | 1267.53        | 634.27           | S    | 1699.84 | 850.42          | 1682.81        | 841.91           | 15 |
| 12 | 1385.61 | 693.31          | 1368.58        | 684.79           | 1413.60 | 707.31          | 1396.58        | 698.79           | E    | 1612.81 | 806.91          | 1595.78        | 798.39           | 14 |
| 13 | 1472.64 | 736.82          | 1455.61        | 728.31           | 1500.64 | 750.82          | 1483.61        | 742.31           | S    | 1483.73 | 742.39          | 1466.74        | 733.87           | 13 |
| 14 | 1587.67 | 794.34          | 1570.64        | 785.82           | 1615.66 | 808.33          | 1598.64        | 799.82           | D    | 1396.73 | 698.87          | 1379.71        | 690.36           | 12 |
| 15 | 1700.75 | 850.88          | 1683.72        | 842.37           | 1728.75 | 864.88          | 1711.72        | 856.36           | L    | 1281.70 | 641.36          | 1264.68        | 632.84           | 11 |
| 16 | 1829.79 | 915.40          | 1812.77        | 906.89           | 1857.79 | 929.40          | 1840.76        | 920.88           | E    | 1168.62 | 584.81          | 1151.59        | 576.30           | 10 |
| 17 | 1958.84 | 979.92          | 1941.81        | 971.41           | 1986.83 | 993.92          | 1969.80        | 985.41           | E    | 1039.58 | 520.29          | 1022.55        | 511.78           | 9  |
| 18 | 2059.88 | 1030.45         | 2042.86        | 1021.93          | 2087.88 | 1044.44         | 2070.85        | 1035.93          | T    | 910.54  | 455.77          | 893.51         | 447.26           | 8  |
| 19 | 2188.93 | 1094.97         | 2171.90        | 1086.45          | 2216.92 | 1108.96         | 2199.89        | 1100.45          | E    | 809.49  | 405.25          | 792.46         | 396.73           | 7  |
| 20 | 2285.98 | 1143.49         | 2268.95        | 1134.98          | 2313.97 | 1157.49         | 2296.95        | 1148.98          | P    | 680.45  | 340.73          | 663.42         | 332.21           | 6  |
| 21 | 2385.05 | 1193.03         | 2368.02        | 1184.51          | 2413.04 | 1207.02         | 2396.02        | 1198.51          | V    | 583.39  | 292.20          | 566.37         | 283.69           | 5  |
| 22 | 2484.12 | 1242.56         | 2467.09        | 1234.05          | 2512.11 | 1256.56         | 2495.08        | 1248.05          | V    | 484.32  | 242.67          | 467.30         | 234.15           | 4  |
| 23 | 2597.20 | 1299.10         | 2580.17        | 1290.59          | 2625.20 | 1313.10         | 2608.17        | 1304.59          | I    | 385.26  | 193.13          | 368.23         | 184.62           | 3  |
| 24 | 2694.25 | 1347.63         | 2677.23        | 1339.12          | 2722.25 | 1361.63         | 2705.22        | 1353.11          | P    | 272.17  | 136.59          | 255.15         | 128.08           | 2  |
| 25 |         |                 |                |                  |         |                 |                |                  | R    | 175.12  | 88.06           | 158.09         | 79.55            | 1  |

## All matches to this query

| Score | Mr(calc) | Delta  | Site Analysis     |
|-------|----------|--------|-------------------|
| 66.6  | 2993.329 | -0.004 | Phospho S9 78.41% |
| 59.9  | 2993.329 | -0.004 | Phospho S5 16.88% |
| 54.3  | 2993.329 | -0.004 | Phospho S11 4.62% |
| 37.3  | 2993.329 | -0.004 | Phospho S13 0.09% |
| 11.6  | 2993.329 | -0.004 | Phospho T18 0.00% |

# Erk1\_S1336, S1340, S1344

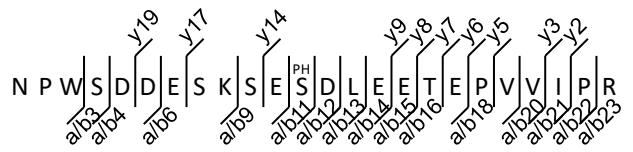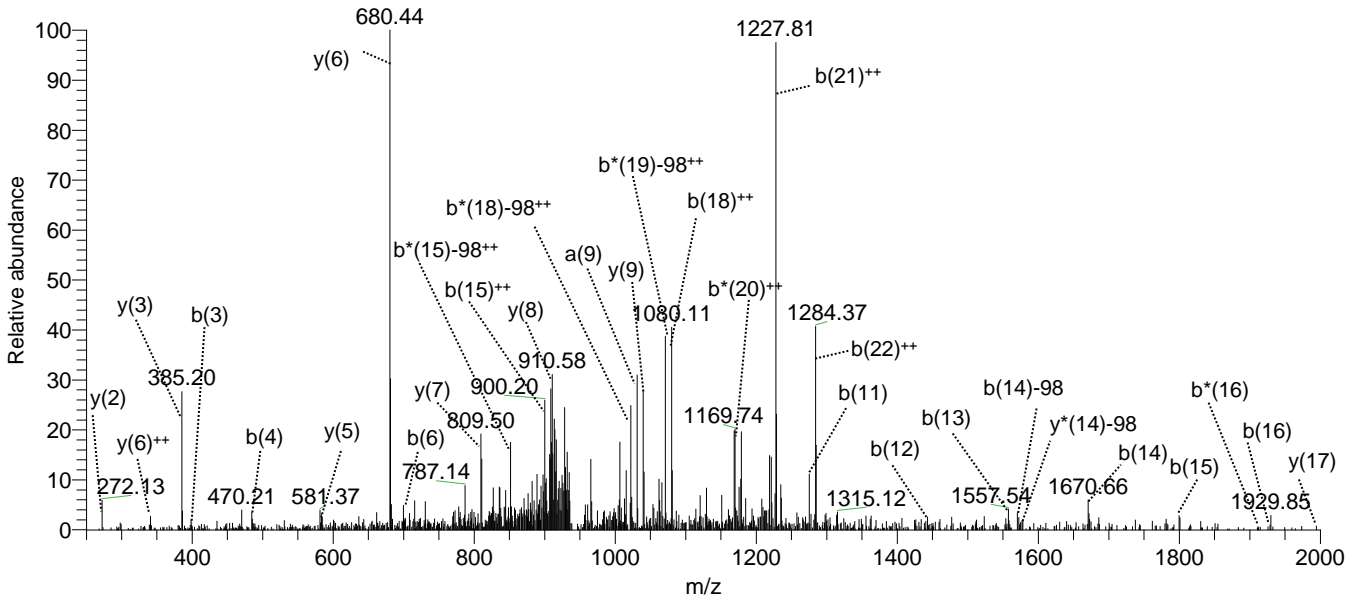

Match to Query 11588: 2837.230062 from(946.750630,3+) intensity(15514.4561) rtinseconds(2595) rawfile(SN221363\_deTOP2B\_Erk1\_1ul.raw) scans(8693) index(6987)

**Monoisotopic mass of neutral peptide Mr(calc):** 2837.2280

**Fixed modifications:** Carbamidomethyl (C) (apply to specified residues or termini only)

**Variable modifications:** S12 : Phospho (ST), with neutral losses 0.0000(shown in table), 97.9769

**Ions Score:** 60 **Expect:** 7e-05 **Matches :** 43/416 fragment ions using 53 most intense peaks

| #  | a       | a <sup>++</sup> | a <sup>*</sup> | a <sup>+++</sup> | b       | b <sup>++</sup> | b <sup>*</sup> | b <sup>+++</sup> | Seq. | y       | y <sup>++</sup> | y <sup>*</sup> | y <sup>+++</sup> | #  |
|----|---------|-----------------|----------------|------------------|---------|-----------------|----------------|------------------|------|---------|-----------------|----------------|------------------|----|
| 1  | 87.06   | 44.03           | 70.03          | 35.52            | 115.05  | 58.03           | 98.02          | 49.52            | N    |         |                 |                |                  | 24 |
| 2  | 184.11  | 92.56           | 167.08         | 84.04            | 212.10  | 106.56          | 195.08         | 98.04            | P    | 2724.19 | 1362.60         | 2707.17        | 1354.09          | 23 |
| 3  | 370.19  | 185.60          | 353.16         | 177.08           | 398.18  | 199.59          | 381.16         | 191.08           | W    | 2627.14 | 1314.07         | 2610.11        | 1305.56          | 22 |
| 4  | 457.22  | 229.11          | 440.19         | 220.60           | 485.21  | 243.11          | 468.19         | 234.60           | S    | 2441.06 | 1221.03         | 2424.03        | 1212.52          | 21 |
| 5  | 572.25  | 286.63          | 555.22         | 278.11           | 600.24  | 300.62          | 583.21         | 292.11           | D    | 2354.03 | 1177.52         | 2337.00        | 1169.00          | 20 |
| 6  | 687.27  | 344.14          | 670.25         | 335.63           | 715.27  | 358.14          | 698.24         | 349.62           | E    | 2239.00 | 1120.00         | 2221.97        | 1111.49          | 19 |
| 7  | 816.32  | 408.66          | 799.29         | 400.15           | 844.31  | 422.66          | 827.28         | 414.15           | D    | 2123.97 | 1062.49         | 2106.95        | 1053.98          | 18 |
| 8  | 903.35  | 452.18          | 886.32         | 443.66           | 931.34  | 466.18          | 914.32         | 457.66           | S    | 1994.93 | 997.97          | 1977.91        | 989.46           | 17 |
| 9  | 1031.44 | 516.23          | 1014.42        | 507.71           | 1059.44 | 530.22          | 1042.41        | 521.71           | K    | 1907.90 | 954.45          | 1890.87        | 945.94           | 16 |
| 10 | 1118.47 | 559.74          | 1101.45        | 551.23           | 1146.47 | 573.74          | 1129.44        | 565.23           | S    | 1779.80 | 890.41          | 1762.78        | 881.89           | 15 |
| 11 | 1247.52 | 624.26          | 1230.49        | 615.75           | 1275.51 | 638.26          | 1258.49        | 629.75           | E    | 1692.77 | 846.89          | 1675.75        | 838.38           | 14 |
| 12 | 1414.52 | 707.76          | 1397.49        | 699.25           | 1442.51 | 721.76          | 1425.48        | 713.25           | S    | 1563.73 | 782.37          | 1546.70        | 773.86           | 13 |
| 13 | 1529.54 | 765.28          | 1512.52        | 756.76           | 1557.54 | 779.27          | 1540.51        | 770.76           | D    | 1396.73 | 698.87          | 1379.71        | 690.36           | 12 |
| 14 | 1642.63 | 821.82          | 1625.60        | 813.30           | 1670.62 | 835.81          | 1653.60        | 827.30           | L    | 1281.70 | 641.36          | 1264.68        | 632.84           | 11 |
| 15 | 1771.67 | 886.34          | 1754.64        | 877.83           | 1799.66 | 900.34          | 1782.64        | 891.82           | E    | 1168.62 | 584.81          | 1151.59        | 576.30           | 10 |
| 16 | 1900.71 | 950.86          | 1883.69        | 942.35           | 1928.71 | 964.86          | 1911.68        | 956.34           | E    | 1039.58 | 520.29          | 1022.55        | 511.78           | 9  |
| 17 | 2001.76 | 1001.38         | 1984.73        | 992.87           | 2029.75 | 1015.38         | 2012.73        | 1006.87          | T    | 910.54  | 455.77          | 893.51         | 447.26           | 8  |
| 18 | 2130.80 | 1065.90         | 2113.78        | 1057.39          | 2158.80 | 1079.90         | 2141.77        | 1071.39          | E    | 809.49  | 405.25          | 792.46         | 396.73           | 7  |
| 19 | 2227.86 | 1114.43         | 2210.83        | 1105.92          | 2255.85 | 1128.43         | 2238.82        | 1119.92          | P    | 680.45  | 340.73          | 663.42         | 332.21           | 6  |
| 20 | 2326.92 | 1163.97         | 2309.90        | 1155.45          | 2354.92 | 1177.96         | 2337.89        | 1169.45          | V    | 583.39  | 292.20          | 566.37         | 283.69           | 5  |
| 21 | 2425.99 | 1213.50         | 2408.97        | 1204.99          | 2453.99 | 1227.50         | 2436.96        | 1218.98          | V    | 484.32  | 242.67          | 467.30         | 234.15           | 4  |
| 22 | 2539.08 | 1270.04         | 2522.05        | 1261.53          | 2567.07 | 1284.04         | 2550.04        | 1275.53          | I    | 385.26  | 193.13          | 368.23         | 184.62           | 3  |
| 23 | 2636.13 | 1318.57         | 2619.10        | 1310.05          | 2664.12 | 1332.57         | 2647.10        | 1324.05          | P    | 272.17  | 136.59          | 255.15         | 128.08           | 2  |
| 24 |         |                 |                |                  |         |                 |                |                  | R    | 175.12  | 88.06           | 158.09         | 79.55            | 1  |

## All matches to this query

| Score | Mr(calc) | Delta | Site Analysis      |
|-------|----------|-------|--------------------|
| 60.3  | 2837.228 | 0.002 | Phospho S12 67.34% |
| 54.1  | 2837.228 | 0.002 | Phospho S10 16.15% |
| 54.1  | 2837.228 | 0.002 | Phospho S8 16.15%  |
| 37    | 2837.228 | 0.002 | Phospho S4 0.31%   |
| 27.7  | 2837.228 | 0.002 | Phospho T17 0.04%  |

# Erk1m\_S1476

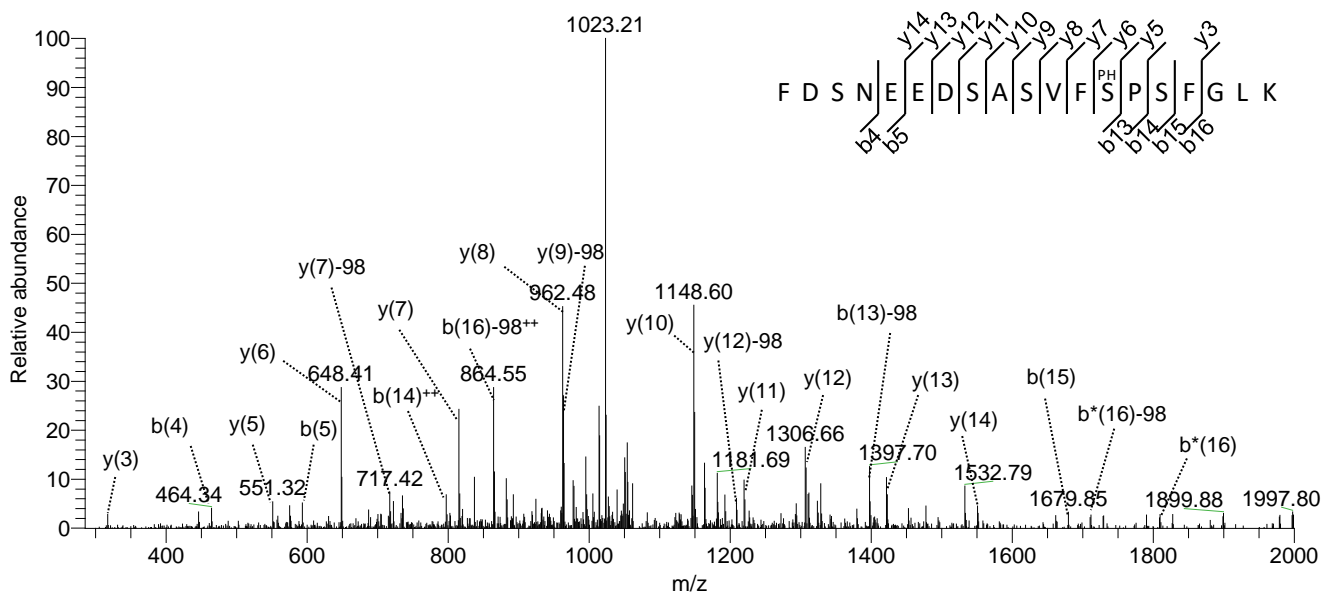

Match to Query 9544: 2141.881308 from(1071.947930,2+) intensity(22847.6758) rtinseconds(3249) rawfile(SN221365\_deTOP2B\_Erk1m1\_1ul.raw) scans(11219) index(9272)

**Monoisotopic mass of neutral peptide Mr(calc):** 2141.8831

**Fixed modifications:** Carbamidomethyl (C) (apply to specified residues or termini only)

**Variable modifications:** S13 : Phospho (ST), with neutral losses 0.0000(shown in table), 97.9769

**Ions Score:** 82 **Expect:** 1.5e-07 **Matches :** 25/300 fragment ions using 34 most intense peaks

| #  | a      | a <sup>++</sup> | a <sup>*</sup> | a <sup>+++</sup> | b      | b <sup>++</sup> | b <sup>*</sup> | b <sup>+++</sup> | Seq. | y      | y <sup>++</sup> | y <sup>*</sup> | y <sup>+++</sup> | #  |
|----|--------|-----------------|----------------|------------------|--------|-----------------|----------------|------------------|------|--------|-----------------|----------------|------------------|----|
| 1  | 120.1  | 60.5            |                |                  | 148.1  | 74.5            |                |                  | F    |        |                 |                |                  | 19 |
| 2  | 235.1  | 118.1           |                |                  | 263.1  | 132.1           |                |                  | D    | 1995.8 | 998.4           | 1978.8         | 989.9            | 18 |
| 3  | 322.1  | 161.6           |                |                  | 350.1  | 175.6           |                |                  | S    | 1880.8 | 940.9           | 1863.8         | 932.4            | 17 |
| 4  | 436.2  | 218.6           | 419.2          | 210.1            | 464.2  | 232.6           | 447.2          | 224.1            | N    | 1793.8 | 897.4           | 1776.7         | 888.9            | 16 |
| 5  | 565.2  | 283.1           | 548.2          | 274.6            | 593.2  | 297.1           | 576.2          | 288.6            | E    | 1679.7 | 840.4           | 1662.7         | 831.9            | 15 |
| 6  | 694.3  | 347.6           | 677.2          | 339.1            | 722.3  | 361.6           | 705.2          | 353.1            | E    | 1550.7 | 775.8           | 1533.7         | 767.3            | 14 |
| 7  | 809.3  | 405.2           | 792.3          | 396.6            | 837.3  | 419.1           | 820.3          | 410.6            | D    | 1421.6 | 711.3           | 1404.6         | 702.8            | 13 |
| 8  | 896.3  | 448.7           | 879.3          | 440.2            | 924.3  | 462.7           | 907.3          | 454.2            | S    | 1306.6 | 653.8           | 1289.6         | 645.3            | 12 |
| 9  | 967.4  | 484.2           | 950.3          | 475.7            | 995.4  | 498.2           | 978.3          | 489.7            | A    | 1219.6 | 610.3           | 1202.5         | 601.8            | 11 |
| 10 | 1054.4 | 527.7           | 1037.4         | 519.2            | 1082.4 | 541.7           | 1065.4         | 533.2            | S    | 1148.5 | 574.8           | 1131.5         | 566.3            | 10 |
| 11 | 1153.5 | 577.2           | 1136.4         | 568.7            | 1181.5 | 591.2           | 1164.4         | 582.7            | V    | 1061.5 | 531.3           | 1044.5         | 522.7            | 9  |
| 12 | 1300.5 | 650.8           | 1283.5         | 642.3            | 1328.5 | 664.8           | 1311.5         | 656.3            | F    | 962.4  | 481.7           | 945.4          | 473.2            | 8  |
| 13 | 1467.5 | 734.3           | 1450.5         | 725.8            | 1495.5 | 748.3           | 1478.5         | 739.8            | S    | 815.4  | 408.2           | 798.3          | 399.7            | 7  |
| 14 | 1564.6 | 782.8           | 1547.6         | 774.3            | 1592.6 | 796.8           | 1575.6         | 788.3            | P    | 648.4  | 324.7           | 631.3          | 316.2            | 6  |
| 15 | 1651.6 | 826.3           | 1634.6         | 817.8            | 1679.6 | 840.3           | 1662.6         | 831.8            | S    | 551.3  | 276.2           | 534.3          | 267.6            | 5  |
| 16 | 1798.7 | 899.8           | 1781.7         | 891.3            | 1826.7 | 913.8           | 1809.7         | 905.3            | F    | 464.3  | 232.6           | 447.3          | 224.1            | 4  |
| 17 | 1855.7 | 928.4           | 1838.7         | 919.8            | 1883.7 | 942.4           | 1866.7         | 933.8            | G    | 317.2  | 159.1           | 300.2          | 150.6            | 3  |
| 18 | 1968.8 | 984.9           | 1951.8         | 976.4            | 1996.8 | 998.9           | 1979.8         | 990.4            | L    | 260.2  | 130.6           | 243.2          | 122.1            | 2  |
| 19 |        |                 |                |                  |        |                 |                |                  | K    | 147.1  | 74.1            | 130.1          | 65.5             | 1  |

## All matches to this query

| Score | Mr(calc)  | Delta   | Site Analysis      |
|-------|-----------|---------|--------------------|
| 81.6  | 2141.8831 | -0.0017 | Phospho S13 99.26% |
| 59    | 2141.8831 | -0.0017 | Phospho S10 0.55%  |
| 54.2  | 2141.8831 | -0.0017 | Phospho S15 0.18%  |
| 38.2  | 2141.8831 | -0.0017 | Phospho S8 0.00%   |
| 24.8  | 2141.8831 | -0.0017 | Phospho S3 0.00%   |

# Erk2\_S1336, S1340, S1344

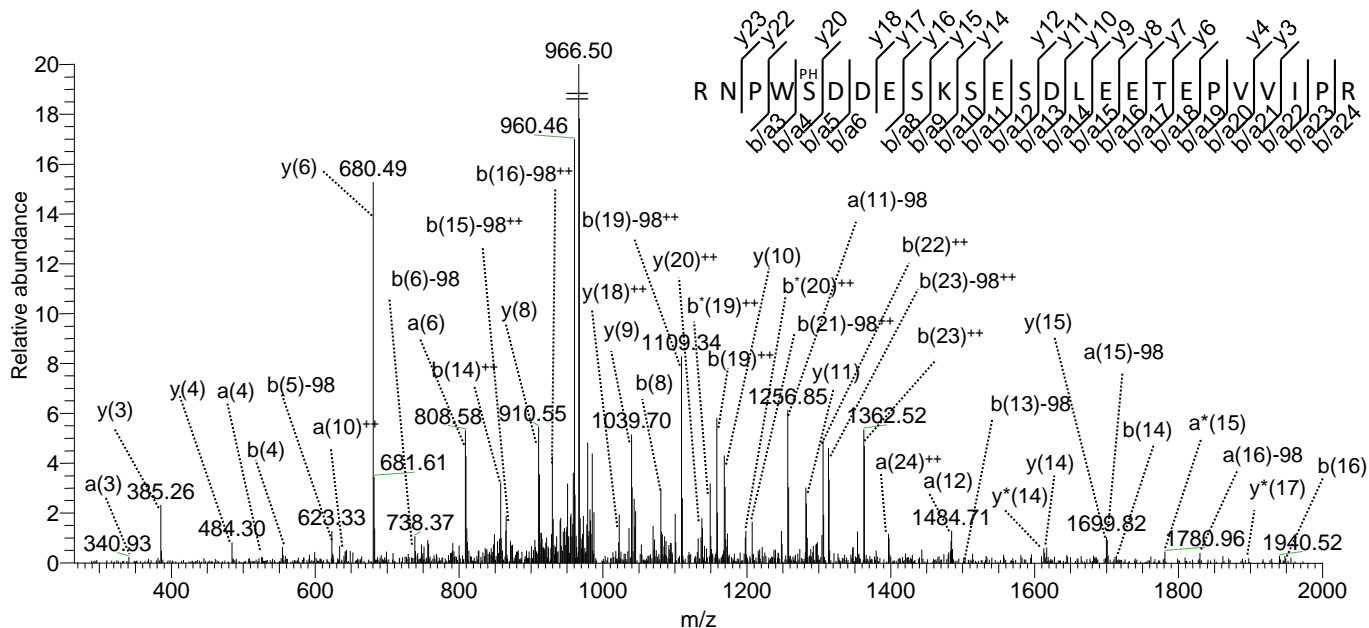

Match to Query 11699: 2993.329722 from(998.783850,3+) intensity(20973.7480) rtinseconds(2565) rawfile(SN221364\_deTOP2B\_Erk2\_1ul.raw) scans(8366) index(6632)

**Monoisotopic mass of neutral peptide Mr(calc):** 2993.3291

**Fixed modifications:** Carbamidomethyl (C) (apply to specified residues or termini only)

**Variable modifications:** S5 : Phospho (ST), with neutral losses 0.0000(shown in table), 97.9769

**Ions Score:** 63 **Expect:** 1e-05 **Matches :** 112/464 fragment ions using 153 most intense peaks

| #  | a      | a <sup>++</sup> | a <sup>*</sup> | a <sup>+++</sup> | b      | b <sup>++</sup> | b <sup>*</sup> | b <sup>+++</sup> | Seq. | y      | y <sup>++</sup> | y <sup>*</sup> | y <sup>+++</sup> | #  |
|----|--------|-----------------|----------------|------------------|--------|-----------------|----------------|------------------|------|--------|-----------------|----------------|------------------|----|
| 1  | 129.1  | 65.1            | 112.1          | 56.5             | 157.1  | 79.1            | 140.1          | 70.5             | R    |        |                 |                |                  | 25 |
| 2  | 243.2  | 122.1           | 226.1          | 113.6            | 271.2  | 136.1           | 254.1          | 127.6            | N    | 2838.2 | 1419.6          | 2821.2         | 1411.1           | 24 |
| 3  | 340.2  | 170.6           | 323.2          | 162.1            | 368.2  | 184.6           | 351.2          | 176.1            | P    | 2724.2 | 1362.6          | 2707.2         | 1354.1           | 23 |
| 4  | 526.3  | 263.6           | 509.3          | 255.1            | 554.3  | 277.6           | 537.3          | 269.1            | W    | 2627.1 | 1314.1          | 2610.1         | 1305.6           | 22 |
| 5  | 693.3  | 347.1           | 676.3          | 338.6            | 721.3  | 361.1           | 704.3          | 352.6            | S    | 2441.1 | 1221.0          | 2424.0         | 1212.5           | 21 |
| 6  | 808.3  | 404.7           | 791.3          | 396.1            | 836.3  | 418.7           | 819.3          | 410.1            | D    | 2274.1 | 1137.5          | 2257.0         | 1129.0           | 20 |
| 7  | 923.3  | 462.2           | 906.3          | 453.7            | 951.3  | 476.2           | 934.3          | 467.7            | D    | 2159.0 | 1080.0          | 2142.0         | 1071.5           | 19 |
| 8  | 1052.4 | 526.7           | 1035.4         | 518.2            | 1080.4 | 540.7           | 1063.4         | 532.2            | E    | 2044.0 | 1022.5          | 2027.0         | 1014.0           | 18 |
| 9  | 1139.4 | 570.2           | 1122.4         | 561.7            | 1167.4 | 584.2           | 1150.4         | 575.7            | S    | 1915.0 | 958.0           | 1897.9         | 949.5            | 17 |
| 10 | 1267.5 | 634.3           | 1250.5         | 625.7            | 1295.5 | 648.3           | 1278.5         | 639.7            | K    | 1827.9 | 914.5           | 1810.9         | 906.0            | 16 |
| 11 | 1354.5 | 677.8           | 1337.5         | 669.3            | 1382.5 | 691.8           | 1365.5         | 683.3            | S    | 1699.8 | 850.4           | 1682.8         | 841.9            | 15 |
| 12 | 1483.6 | 742.3           | 1466.6         | 733.8            | 1511.6 | 756.3           | 1494.6         | 747.8            | E    | 1612.8 | 806.9           | 1595.8         | 798.4            | 14 |
| 13 | 1570.6 | 785.8           | 1553.6         | 777.3            | 1598.6 | 799.8           | 1581.6         | 791.3            | S    | 1483.8 | 742.4           | 1466.7         | 733.9            | 13 |
| 14 | 1685.6 | 843.3           | 1668.6         | 834.8            | 1713.6 | 857.3           | 1696.6         | 848.8            | D    | 1396.7 | 698.9           | 1379.7         | 690.4            | 12 |
| 15 | 1798.7 | 899.9           | 1781.7         | 891.4            | 1826.7 | 913.9           | 1809.7         | 905.4            | L    | 1281.7 | 641.4           | 1264.7         | 632.8            | 11 |
| 16 | 1927.8 | 964.4           | 1910.7         | 955.9            | 1955.8 | 978.4           | 1938.7         | 969.9            | E    | 1168.6 | 584.8           | 1151.6         | 576.3            | 10 |
| 17 | 2056.8 | 1028.9          | 2039.8         | 1020.4           | 2084.8 | 1042.9          | 2067.8         | 1034.4           | E    | 1039.6 | 520.3           | 1022.6         | 511.8            | 9  |
| 18 | 2157.9 | 1079.4          | 2140.8         | 1070.9           | 2185.9 | 1093.4          | 2168.8         | 1084.9           | T    | 910.5  | 455.8           | 893.5          | 447.3            | 8  |
| 19 | 2286.9 | 1144.0          | 2269.9         | 1135.4           | 2314.9 | 1158.0          | 2297.9         | 1149.4           | E    | 809.5  | 405.2           | 792.5          | 396.7            | 7  |
| 20 | 2384.0 | 1192.5          | 2366.9         | 1184.0           | 2412.0 | 1206.5          | 2394.9         | 1198.0           | P    | 680.4  | 340.7           | 663.4          | 332.2            | 6  |
| 21 | 2483.0 | 1242.0          | 2466.0         | 1233.5           | 2511.0 | 1256.0          | 2494.0         | 1247.5           | V    | 583.4  | 292.2           | 566.4          | 283.7            | 5  |
| 22 | 2582.1 | 1291.6          | 2565.1         | 1283.0           | 2610.1 | 1305.5          | 2593.1         | 1297.0           | V    | 484.3  | 242.7           | 467.3          | 234.2            | 4  |
| 23 | 2695.2 | 1348.1          | 2678.2         | 1339.6           | 2723.2 | 1362.1          | 2706.1         | 1353.6           | I    | 385.3  | 193.1           | 368.2          | 184.6            | 3  |
| 24 | 2792.2 | 1396.6          | 2775.2         | 1388.1           | 2820.2 | 1410.6          | 2803.2         | 1402.1           | P    | 272.2  | 136.6           | 255.1          | 128.1            | 2  |
| 25 |        |                 |                |                  |        |                 |                |                  | R    | 175.1  | 88.1            | 158.1          | 79.5             | 1  |

## All matches to this query

| Score | Mr(calc) | Delta  | Site Analysis     |
|-------|----------|--------|-------------------|
| 63.1  | 2993.329 | 0.0006 | Phospho S5 75.56% |
| 58    | 2993.329 | 0.0006 | Phospho S9 23.78% |
| 42.2  | 2993.329 | 0.0006 | Phospho S11 0.62% |
| 30    | 2993.329 | 0.0006 | Phospho S13 0.04% |

# Erk2\_S1336, S1340, S1344

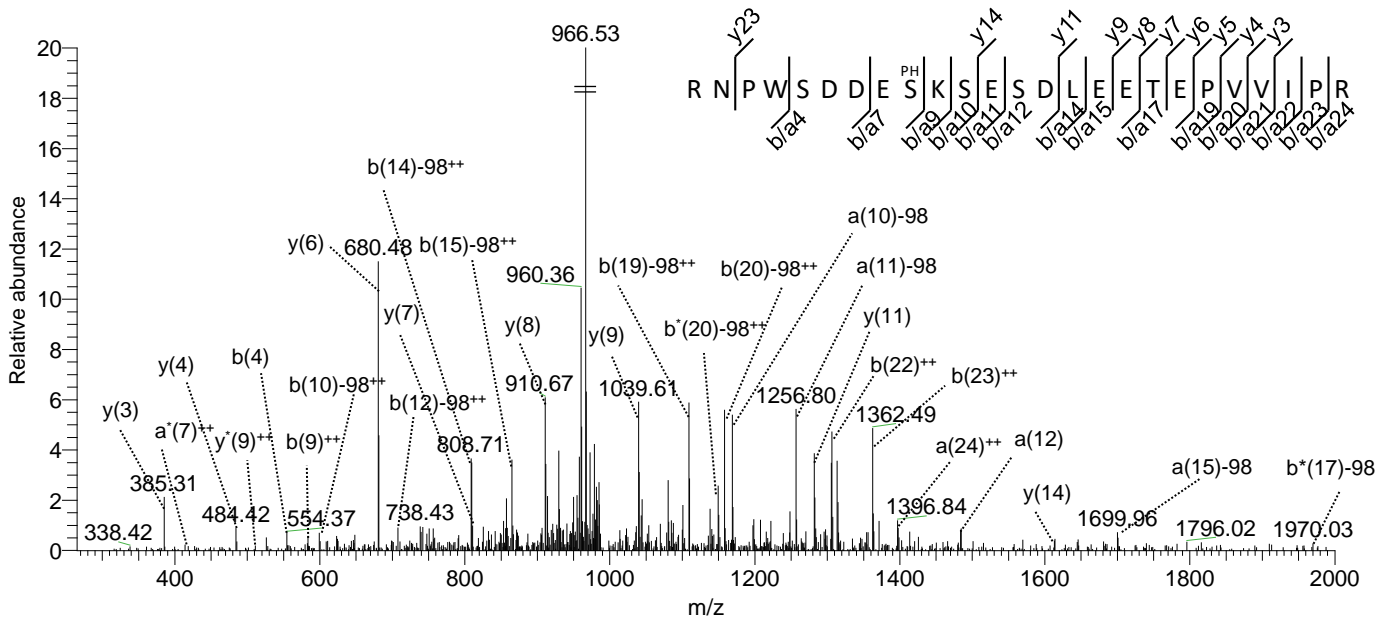

Match to Query 11698: 2993.329182 from(998.783670,3+) intensity(20568.6523) rtinseconds(2558) rawfile(SN221364\_deTOP2B\_Erk2\_1ul.raw) scans(8339) index(6607)

**Monoisotopic mass of neutral peptide Mr(calc):** 2993.3291

**Fixed modifications:** Carbamidomethyl (C) (apply to specified residues or termini only)

**Variable modifications:** S9 : Phospho (ST), with neutral losses 97.9769(shown in table), 0.0000

**Ions Score:** 63 **Expect:** 2.4e-05 **Matches :** 44/448 fragment ions using 51 most intense peaks

| #  | a      | a <sup>++</sup> | a <sup>*</sup> | a <sup>+++</sup> | b      | b <sup>++</sup> | b <sup>*</sup> | b <sup>+++</sup> | Seq. | y      | y <sup>++</sup> | y <sup>*</sup> | y <sup>+++</sup> | #  |
|----|--------|-----------------|----------------|------------------|--------|-----------------|----------------|------------------|------|--------|-----------------|----------------|------------------|----|
| 1  | 129.1  | 65.1            | 112.1          | 56.5             | 157.1  | 79.1            | 140.1          | 70.5             | R    |        |                 |                |                  | 25 |
| 2  | 243.2  | 122.1           | 226.1          | 113.6            | 271.2  | 136.1           | 254.1          | 127.6            | N    | 2740.3 | 1370.6          | 2723.2         | 1362.1           | 24 |
| 3  | 340.2  | 170.6           | 323.2          | 162.1            | 368.2  | 184.6           | 351.2          | 176.1            | P    | 2626.2 | 1313.6          | 2609.2         | 1305.1           | 23 |
| 4  | 526.3  | 263.6           | 509.3          | 255.1            | 554.3  | 277.6           | 537.3          | 269.1            | W    | 2529.2 | 1265.1          | 2512.1         | 1256.6           | 22 |
| 5  | 613.3  | 307.2           | 596.3          | 298.7            | 641.3  | 321.2           | 624.3          | 312.6            | S    | 2343.1 | 1172.0          | 2326.1         | 1163.5           | 21 |
| 6  | 728.3  | 364.7           | 711.3          | 356.2            | 756.3  | 378.7           | 739.3          | 370.2            | D    | 2256.1 | 1128.5          | 2239.0         | 1120.0           | 20 |
| 7  | 843.4  | 422.2           | 826.3          | 413.7            | 871.4  | 436.2           | 854.3          | 427.7            | D    | 2141.0 | 1071.0          | 2124.0         | 1062.5           | 19 |
| 8  | 972.4  | 486.7           | 955.4          | 478.2            | 1000.4 | 500.7           | 983.4          | 492.2            | E    | 2026.0 | 1013.5          | 2009.0         | 1005.0           | 18 |
| 9  | 1041.4 | 521.2           | 1024.4         | 512.7            | 1069.4 | 535.2           | 1052.4         | 526.7            | S    | 1897.0 | 949.0           | 1879.9         | 940.5            | 17 |
| 10 | 1169.5 | 585.3           | 1152.5         | 576.8            | 1197.5 | 599.3           | 1180.5         | 590.8            | K    | 1827.9 | 914.5           | 1810.9         | 906.0            | 16 |
| 11 | 1256.6 | 628.8           | 1239.5         | 620.3            | 1284.6 | 642.8           | 1267.5         | 634.3            | S    | 1699.8 | 850.4           | 1682.8         | 841.9            | 15 |
| 12 | 1385.6 | 693.3           | 1368.6         | 684.8            | 1413.6 | 707.3           | 1396.6         | 698.8            | E    | 1612.8 | 806.9           | 1595.8         | 798.4            | 14 |
| 13 | 1472.6 | 736.8           | 1455.6         | 728.3            | 1500.6 | 750.8           | 1483.6         | 742.3            | S    | 1483.8 | 742.4           | 1466.7         | 733.9            | 13 |
| 14 | 1587.7 | 794.3           | 1570.6         | 785.8            | 1615.7 | 808.3           | 1598.6         | 799.8            | D    | 1396.7 | 698.9           | 1379.7         | 690.4            | 12 |
| 15 | 1700.8 | 850.9           | 1683.7         | 842.4            | 1728.7 | 864.9           | 1711.7         | 856.4            | L    | 1281.7 | 641.4           | 1264.7         | 632.8            | 11 |
| 16 | 1829.8 | 915.4           | 1812.8         | 906.9            | 1857.8 | 929.4           | 1840.8         | 920.9            | E    | 1168.6 | 584.8           | 1151.6         | 576.3            | 10 |
| 17 | 1958.8 | 979.9           | 1941.8         | 971.4            | 1986.8 | 993.9           | 1969.8         | 985.4            | E    | 1039.6 | 520.3           | 1022.6         | 511.8            | 9  |
| 18 | 2059.9 | 1030.4          | 2042.9         | 1021.9           | 2087.9 | 1044.4          | 2070.9         | 1035.9           | T    | 910.5  | 455.8           | 893.5          | 447.3            | 8  |
| 19 | 2188.9 | 1095.0          | 2171.9         | 1086.5           | 2216.9 | 1109.0          | 2199.9         | 1100.5           | E    | 809.5  | 405.2           | 792.5          | 396.7            | 7  |
| 20 | 2286.0 | 1143.5          | 2269.0         | 1135.0           | 2314.0 | 1157.5          | 2296.9         | 1149.0           | P    | 680.4  | 340.7           | 663.4          | 332.2            | 6  |
| 21 | 2385.0 | 1193.0          | 2368.0         | 1184.5           | 2413.0 | 1207.0          | 2396.0         | 1198.5           | V    | 583.4  | 292.2           | 566.4          | 283.7            | 5  |
| 22 | 2484.1 | 1242.6          | 2467.1         | 1234.0           | 2512.1 | 1256.6          | 2495.1         | 1248.0           | V    | 484.3  | 242.7           | 467.3          | 234.2            | 4  |
| 23 | 2597.2 | 1299.1          | 2580.2         | 1290.6           | 2625.2 | 1313.1          | 2608.2         | 1304.6           | I    | 385.3  | 193.1           | 368.2          | 184.6            | 3  |
| 24 | 2694.3 | 1347.6          | 2677.2         | 1339.1           | 2722.2 | 1361.6          | 2705.2         | 1353.1           | P    | 272.2  | 136.6           | 255.1          | 128.1            | 2  |
| 25 |        |                 |                |                  |        |                 |                |                  | R    | 175.1  | 88.1            | 158.1          | 79.5             | 1  |

## All matches to this query

| Score | Mr(calc)  | Delta  | Site Analysis     |
|-------|-----------|--------|-------------------|
| 63    | 2993.3291 | 0.0001 | Phospho S9 58.20% |
| 61.2  | 2993.3291 | 0.0001 | Phospho S5 38.90% |
| 49.9  | 2993.3291 | 0.0001 | Phospho S11 2.86% |
| 31    | 2993.3291 | 0.0001 | Phospho S13 0.04% |

# Erk2\_S1336, S1340, S1344

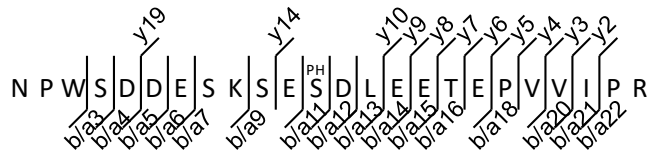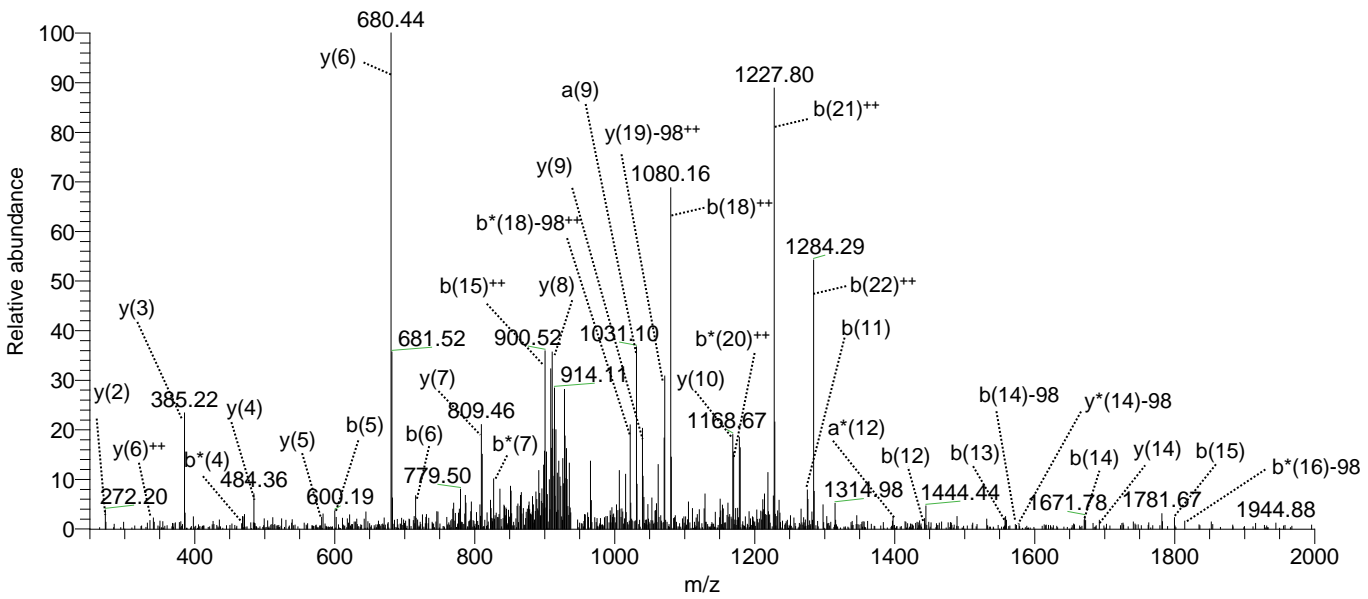

Match to Query 11292: 2837.226972 from(946.749600,3+) intensity(9996.0352) rtinseconds(2605) rawfile(SN221364\_deTOP2B\_Erk2\_1ul.raw) scans(8539) index(6791)

**Monoisotopic mass of neutral peptide Mr(calc):** 2837.2280

**Fixed modifications:** Carbamidomethyl (C) (apply to specified residues or termini only)

**Variable modifications:** S12 : Phospho (ST), with neutral losses 0.0000(shown in table), 97.9769

**Ions Score:** 59 **Expect:** 0.00013 **Matches :** 46/416 fragment ions using 54 most intense peaks

| #  | a             | a <sup>++</sup> | a <sup>*</sup> | a <sup>+++</sup> | b             | b <sup>++</sup> | b <sup>*</sup> | b <sup>+++</sup> | Seq. | y             | y <sup>++</sup> | y <sup>*</sup> | y <sup>+++</sup> | #  |
|----|---------------|-----------------|----------------|------------------|---------------|-----------------|----------------|------------------|------|---------------|-----------------|----------------|------------------|----|
| 1  | 129.1         | 65.1            | 112.1          | 56.5             | 157.1         | 79.1            | 140.1          | 70.5             | R    |               |                 |                |                  | 25 |
| 2  | 243.2         | 122.1           | 226.1          | 113.6            | 271.2         | 136.1           | 254.1          | 127.6            | N    | 2838.2        | 1419.6          | 2821.2         | 1411.1           | 24 |
| 3  | <b>340.2</b>  | 170.6           | 323.2          | 162.1            | <b>368.2</b>  | 184.6           | 351.2          | 176.1            | P    | 2724.2        | <b>1362.6</b>   | 2707.2         | <b>1354.1</b>    | 23 |
| 4  | <b>526.3</b>  | 263.6           | 509.3          | 255.1            | <b>554.3</b>  | 277.6           | 537.3          | 269.1            | W    | 2627.1        | <b>1314.1</b>   | 2610.1         | <b>1305.6</b>    | 22 |
| 5  | 693.3         | 347.1           | 676.3          | 338.6            | 721.3         | 361.1           | 704.3          | 352.6            | S    | 2441.1        | 1221.0          | 2424.0         | 1212.5           | 21 |
| 6  | <b>808.3</b>  | 404.7           | 791.3          | 396.1            | 836.3         | 418.7           | 819.3          | 410.1            | D    | 2274.1        | <b>1137.5</b>   | 2257.0         | 1129.0           | 20 |
| 7  | 923.3         | 462.2           | 906.3          | 453.7            | 951.3         | 476.2           | 934.3          | 467.7            | D    | 2159.0        | <b>1080.0</b>   | 2142.0         | 1071.5           | 19 |
| 8  | 1052.4        | <b>526.7</b>    | <b>1035.4</b>  | 518.2            | <b>1080.4</b> | 540.7           | 1063.4         | 532.2            | E    | 2044.0        | <b>1022.5</b>   | 2027.0         | 1014.0           | 18 |
| 9  | 1139.4        | 570.2           | 1122.4         | 561.7            | 1167.4        | <b>584.2</b>    | 1150.4         | <b>575.7</b>     | S    | 1915.0        | <b>958.0</b>    | <b>1897.9</b>  | 949.5            | 17 |
| 10 | 1267.5        | <b>634.3</b>    | 1250.5         | 625.7            | 1295.5        | <b>648.3</b>    | 1278.5         | 639.7            | K    | <b>1827.9</b> | 914.5           | 1810.9         | 906.0            | 16 |
| 11 | <b>1354.5</b> | 677.8           | 1337.5         | 669.3            | 1382.5        | 691.8           | 1365.5         | <b>683.3</b>     | S    | <b>1699.8</b> | 850.4           | 1682.8         | 841.9            | 15 |
| 12 | <b>1483.6</b> | 742.3           | 1466.6         | 733.8            | 1511.6        | <b>756.3</b>    | 1494.6         | <b>747.8</b>     | E    | <b>1612.8</b> | 806.9           | <b>1595.8</b>  | 798.4            | 14 |
| 13 | 1570.6        | 785.8           | 1553.6         | 777.3            | 1598.6        | 799.8           | 1581.6         | 791.3            | S    | <b>1483.8</b> | 742.4           | 1466.7         | 733.9            | 13 |
| 14 | 1685.6        | 843.3           | 1668.6         | 834.8            | <b>1713.6</b> | <b>857.3</b>    | 1696.6         | <b>848.8</b>     | D    | <b>1396.7</b> | <b>698.9</b>    | 1379.7         | 690.4            | 12 |
| 15 | <b>1798.7</b> | 899.9           | <b>1781.7</b>  | 891.4            | 1826.7        | 913.9           | <b>1809.7</b>  | 905.4            | L    | <b>1281.7</b> | <b>641.4</b>    | 1264.7         | 632.8            | 11 |
| 16 | 1927.8        | 964.4           | 1910.7         | 955.9            | <b>1955.8</b> | <b>978.4</b>    | 1938.7         | 969.9            | E    | <b>1168.6</b> | <b>584.8</b>    | 1151.6         | <b>576.3</b>     | 10 |
| 17 | 2056.8        | 1028.9          | 2039.8         | 1020.4           | 2084.8        | <b>1042.9</b>   | 2067.8         | 1034.4           | E    | <b>1039.6</b> | 520.3           | <b>1022.6</b>  | 511.8            | 9  |
| 18 | 2157.9        | 1079.4          | 2140.8         | 1070.9           | 2185.9        | 1093.4          | 2168.8         | 1084.9           | T    | <b>910.5</b>  | 455.8           | 893.5          | 447.3            | 8  |
| 19 | 2286.9        | 1144.0          | 2269.9         | 1135.4           | 2314.9        | <b>1158.0</b>   | 2297.9         | <b>1149.4</b>    | E    | <b>809.5</b>  | 405.2           | 792.5          | 396.7            | 7  |
| 20 | 2384.0        | 1192.5          | 2366.9         | 1184.0           | 2412.0        | 1206.5          | 2394.9         | <b>1198.0</b>    | P    | <b>680.4</b>  | <b>340.7</b>    | 663.4          | 332.2            | 6  |
| 21 | 2483.0        | 1242.0          | 2466.0         | 1233.5           | 2511.0        | 1256.0          | 2494.0         | <b>1247.5</b>    | V    | <b>583.4</b>  | 292.2           | 566.4          | 283.7            | 5  |
| 22 | 2582.1        | 1291.6          | 2565.1         | <b>1283.0</b>    | 2610.1        | <b>1305.5</b>   | 2593.1         | 1297.0           | V    | <b>484.3</b>  | 242.7           | 467.3          | 234.2            | 4  |
| 23 | 2695.2        | 1348.1          | 2678.2         | 1339.6           | 2723.2        | <b>1362.1</b>   | 2706.1         | <b>1353.6</b>    | I    | <b>385.3</b>  | 193.1           | <b>368.2</b>   | 184.6            | 3  |
| 24 | 2792.2        | <b>1396.6</b>   | 2775.2         | 1388.1           | 2820.2        | 1410.6          | 2803.2         | 1402.1           | P    | 272.2         | 136.6           | 255.1          | 128.1            | 2  |
| 25 |               |                 |                |                  |               |                 |                |                  | R    | 175.1         | 88.1            | 158.1          | 79.5             | 1  |

## All matches to this query

| Score | Mr(calc) | Delta  | Site Analysis      |
|-------|----------|--------|--------------------|
| 59.4  | 2837.228 | -0.001 | Phospho S12 94.58% |
| 42.9  | 2837.228 | -0.001 | Phospho S10 2.08%  |
| 42.9  | 2837.228 | -0.001 | Phospho S8 2.08%   |
| 40.6  | 2837.228 | -0.001 | Phospho S4 1.25%   |
| 21.5  | 2837.228 | -0.001 | Phospho T17 0.02%  |

# Erk2m\_S1449

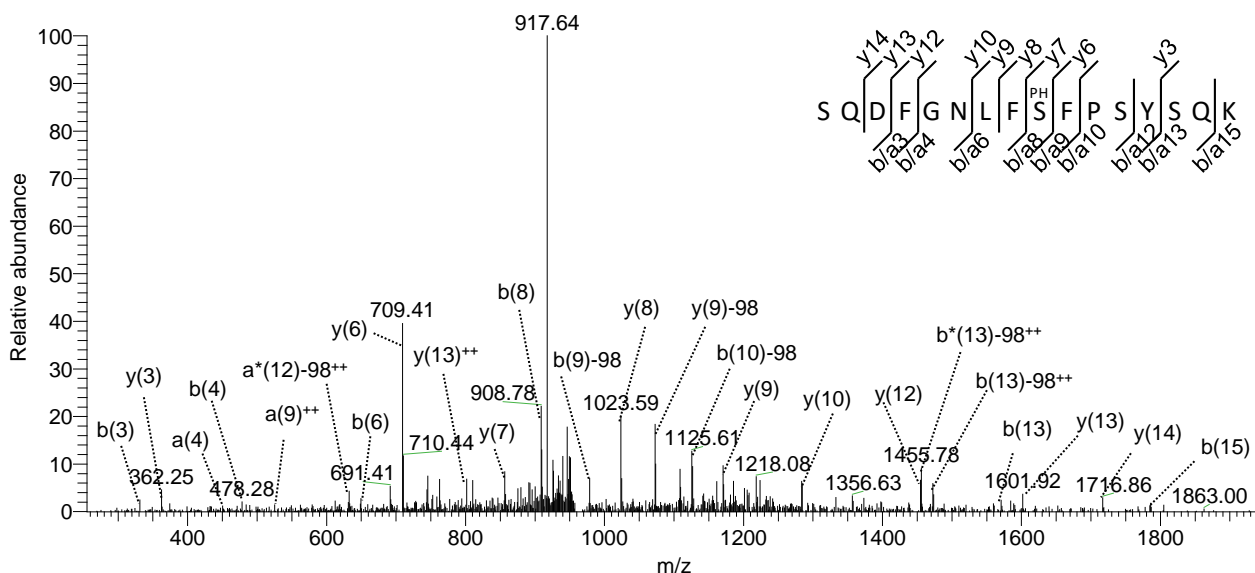

Match to Query 8559: 1930.811788 from(966.413170,2+) intensity(12163.2783) rtinseconds(3270) rawfile(SN221366\_deTOP2B\_Erk2m\_1ul.raw) scans(11317) index(9361)

**Monoisotopic mass of neutral peptide Mr(calc):** 1930.8139

**Fixed modifications:** Carbamidomethyl (C) (apply to specified residues or termini only)

**Variable modifications:** S9 : Phospho (ST), with neutral losses 0.0000(shown in table), 97.9769

**Ions Score:** 66 **Expect:** 2.6e-06 **Matches :** 29/264 fragment ions using 34 most intense peaks

| #  | a      | a <sup>++</sup> | a <sup>*</sup> | a <sup>+++</sup> | b      | b <sup>++</sup> | b <sup>*</sup> | b <sup>+++</sup> | Seq. | y      | y <sup>++</sup> | y <sup>*</sup> | y <sup>+++</sup> | #  |
|----|--------|-----------------|----------------|------------------|--------|-----------------|----------------|------------------|------|--------|-----------------|----------------|------------------|----|
| 1  | 60.0   | 30.5            |                |                  | 88.0   | 44.5            |                |                  | S    |        |                 |                |                  | 16 |
| 2  | 188.1  | 94.6            | 171.1          | 86.0             | 216.1  | 108.6           | 199.1          | 100.0            | Q    | 1844.8 | 922.9           | 1827.8         | 914.4            | 15 |
| 3  | 303.1  | 152.1           | 286.1          | 143.6            | 331.1  | 166.1           | 314.1          | 157.6            | D    | 1716.7 | 858.9           | 1699.7         | 850.4            | 14 |
| 4  | 450.2  | 225.6           | 433.2          | 217.1            | 478.2  | 239.6           | 461.2          | 231.1            | F    | 1601.7 | 801.4           | 1584.7         | 792.8            | 13 |
| 5  | 507.2  | 254.1           | 490.2          | 245.6            | 535.2  | 268.1           | 518.2          | 259.6            | G    | 1454.6 | 727.8           | 1437.6         | 719.3            | 12 |
| 6  | 621.3  | 311.1           | 604.2          | 302.6            | 649.3  | 325.1           | 632.2          | 316.6            | N    | 1397.6 | 699.3           | 1380.6         | 690.8            | 11 |
| 7  | 734.3  | 367.7           | 717.3          | 359.2            | 762.3  | 381.7           | 745.3          | 373.2            | L    | 1283.6 | 642.3           | 1266.5         | 633.8            | 10 |
| 8  | 881.4  | 441.2           | 864.4          | 432.7            | 909.4  | 455.2           | 892.4          | 446.7            | F    | 1170.5 | 585.7           | 1153.5         | 577.2            | 9  |
| 9  | 1048.4 | 524.7           | 1031.4         | 516.2            | 1076.4 | 538.7           | 1059.4         | 530.2            | S    | 1023.4 | 512.2           | 1006.4         | 503.7            | 8  |
| 10 | 1195.5 | 598.2           | 1178.5         | 589.7            | 1223.5 | 612.2           | 1206.5         | 603.7            | F    | 856.4  | 428.7           | 839.4          | 420.2            | 7  |
| 11 | 1292.5 | 646.8           | 1275.5         | 638.3            | 1320.5 | 660.8           | 1303.5         | 652.3            | P    | 709.4  | 355.2           | 692.3          | 346.7            | 6  |
| 12 | 1379.6 | 690.3           | 1362.5         | 681.8            | 1407.6 | 704.3           | 1390.5         | 695.8            | S    | 612.3  | 306.7           | 595.3          | 298.1            | 5  |
| 13 | 1542.6 | 771.8           | 1525.6         | 763.3            | 1570.6 | 785.8           | 1553.6         | 777.3            | Y    | 525.3  | 263.1           | 508.2          | 254.6            | 4  |
| 14 | 1629.7 | 815.3           | 1612.6         | 806.8            | 1657.7 | 829.3           | 1640.6         | 820.8            | S    | 362.2  | 181.6           | 345.2          | 173.1            | 3  |
| 15 | 1757.7 | 879.4           | 1740.7         | 870.9            | 1785.7 | 893.4           | 1768.7         | 884.8            | Q    | 275.2  | 138.1           | 258.1          | 129.6            | 2  |
| 16 |        |                 |                |                  |        |                 |                |                  | K    | 147.1  | 74.1            | 130.1          | 65.5             | 1  |

## All matches to this query

| Score | Mr(calc)  | Delta   | Site Analysis     |
|-------|-----------|---------|-------------------|
| 65.8  | 1930.8139 | -0.0021 | Phospho S9 99.81% |
| 38.3  | 1930.8139 | -0.0021 | Phospho S12 0.18% |
| 23    | 1930.8139 | -0.0021 | Phospho Y13 0.01% |
| 21.6  | 1930.8139 | -0.0021 | Phospho S14 0.00% |
| 13.2  | 1930.8139 | -0.0021 | Phospho S1 0.00%  |



# Erk2m\_S1476

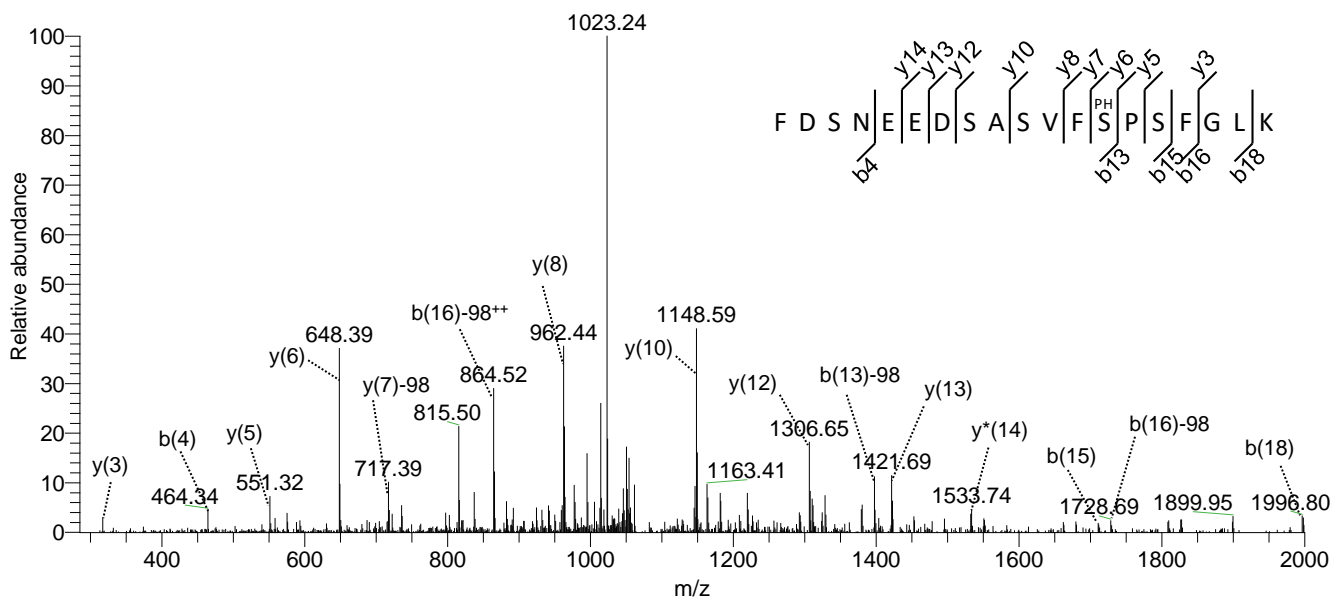

Match to Query 9274: 2141.882588 from(1071.948570,2+) intensity(21991.7324) rtinseconds(3251) rawfile(SN221366\_deTOP2B\_Erk2m\_1ul.raw) scans(11238) index(9288)

**Monoisotopic mass of neutral peptide Mr(calc):** 2141.8831

**Fixed modifications:** Carbamidomethyl (C) (apply to specified residues or termini only)

**Variable modifications:** S13 : Phospho (ST), with neutral losses 0.0000(shown in table), 97.9769

**Ions Score:** 80 **Expect:** 6.9e-08 **Matches :** 19/300 fragment ions using 17 most intense peaks z

| #  | a      | a <sup>++</sup> | a <sup>*</sup> | a <sup>+++</sup> | b      | b <sup>++</sup> | b <sup>*</sup> | b <sup>+++</sup> | Seq. | y      | y <sup>++</sup> | y <sup>*</sup> | y <sup>+++</sup> | #  |
|----|--------|-----------------|----------------|------------------|--------|-----------------|----------------|------------------|------|--------|-----------------|----------------|------------------|----|
| 1  | 120.1  | 60.5            |                |                  | 148.1  | 74.5            |                |                  | F    |        |                 |                |                  | 19 |
| 2  | 235.1  | 118.1           |                |                  | 263.1  | 132.1           |                |                  | D    | 1995.8 | 998.4           | 1978.8         | 989.9            | 18 |
| 3  | 322.1  | 161.6           |                |                  | 350.1  | 175.6           |                |                  | S    | 1880.8 | 940.9           | 1863.8         | 932.4            | 17 |
| 4  | 436.2  | 218.6           | 419.2          | 210.1            | 464.2  | 232.6           | 447.2          | 224.1            | N    | 1793.8 | 897.4           | 1776.7         | 888.9            | 16 |
| 5  | 565.2  | 283.1           | 548.2          | 274.6            | 593.2  | 297.1           | 576.2          | 288.6            | E    | 1679.7 | 840.4           | 1662.7         | 831.9            | 15 |
| 6  | 694.3  | 347.6           | 677.2          | 339.1            | 722.3  | 361.6           | 705.2          | 353.1            | E    | 1550.7 | 775.8           | 1533.7         | 767.3            | 14 |
| 7  | 809.3  | 405.2           | 792.3          | 396.6            | 837.3  | 419.1           | 820.3          | 410.6            | D    | 1421.6 | 711.3           | 1404.6         | 702.8            | 13 |
| 8  | 896.3  | 448.7           | 879.3          | 440.2            | 924.3  | 462.7           | 907.3          | 454.2            | S    | 1306.6 | 653.8           | 1289.6         | 645.3            | 12 |
| 9  | 967.4  | 484.2           | 950.3          | 475.7            | 995.4  | 498.2           | 978.3          | 489.7            | A    | 1219.6 | 610.3           | 1202.5         | 601.8            | 11 |
| 10 | 1054.4 | 527.7           | 1037.4         | 519.2            | 1082.4 | 541.7           | 1065.4         | 533.2            | S    | 1148.5 | 574.8           | 1131.5         | 566.3            | 10 |
| 11 | 1153.5 | 577.2           | 1136.4         | 568.7            | 1181.5 | 591.2           | 1164.4         | 582.7            | V    | 1061.5 | 531.3           | 1044.5         | 522.7            | 9  |
| 12 | 1300.5 | 650.8           | 1283.5         | 642.3            | 1328.5 | 664.8           | 1311.5         | 656.3            | F    | 962.4  | 481.7           | 945.4          | 473.2            | 8  |
| 13 | 1467.5 | 734.3           | 1450.5         | 725.8            | 1495.5 | 748.3           | 1478.5         | 739.8            | S    | 815.4  | 408.2           | 798.3          | 399.7            | 7  |
| 14 | 1564.6 | 782.8           | 1547.6         | 774.3            | 1592.6 | 796.8           | 1575.6         | 788.3            | P    | 648.4  | 324.7           | 631.3          | 316.2            | 6  |
| 15 | 1651.6 | 826.3           | 1634.6         | 817.8            | 1679.6 | 840.3           | 1662.6         | 831.8            | S    | 551.3  | 276.2           | 534.3          | 267.6            | 5  |
| 16 | 1798.7 | 899.8           | 1781.7         | 891.3            | 1826.7 | 913.8           | 1809.7         | 905.3            | F    | 464.3  | 232.6           | 447.3          | 224.1            | 4  |
| 17 | 1855.7 | 928.4           | 1838.7         | 919.8            | 1883.7 | 942.4           | 1866.7         | 933.8            | G    | 317.2  | 159.1           | 300.2          | 150.6            | 3  |
| 18 | 1968.8 | 984.9           | 1951.8         | 976.4            | 1996.8 | 998.9           | 1979.8         | 990.4            | L    | 260.2  | 130.6           | 243.2          | 122.1            | 2  |
| 19 |        |                 |                |                  |        |                 |                |                  | K    | 147.1  | 74.1            | 130.1          | 65.5             | 1  |

## All matches to this query

| Score | Mr(calc)  | Delta   | Site Analysis      |
|-------|-----------|---------|--------------------|
| 80.2  | 2141.8831 | -0.0005 | Phospho S13 99.06% |
| 59.6  | 2141.8831 | -0.0005 | Phospho S10 0.86%  |
| 46.4  | 2141.8831 | -0.0005 | Phospho S15 0.04%  |
| 45.3  | 2141.8831 | -0.0005 | Phospho S8 0.03%   |
| 19.4  | 2141.8831 | -0.0005 | Phospho S3 0.00%   |

# Erk2m\_T1267

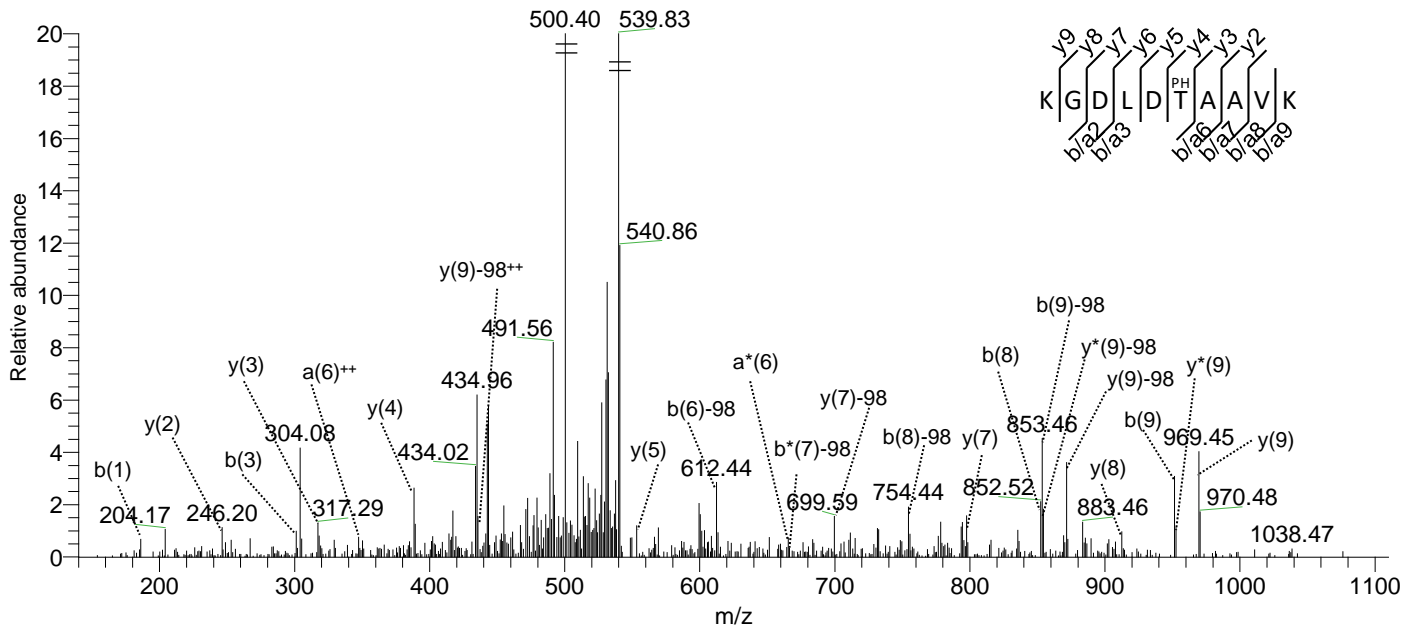

Match to Query 2189: 1096.516888 from(549.265720,2+) intensity(10601.1406) rtinseconds(1259) rawfile(SN221366\_deTOP2B\_Erk2m\_1ul.raw) scans(2924) index(1760)

**Monoisotopic mass of neutral peptide Mr(calc):** 1096.5165

**Fixed modifications:** Carbamidomethyl (C) (apply to specified residues or termini only)

**Variable modifications:** T6 : Phospho (ST), with neutral losses 0.0000(shown in table), 97.9769

**Ions Score:** 40 **Expect:** 0.0052 **Matches :** 27/160 fragment ions using 64 most intense peaks

| #  | a     | a <sup>++</sup> | a <sup>*</sup> | a <sup>+++</sup> | b     | b <sup>++</sup> | b <sup>*</sup> | b <sup>+++</sup> | Seq. | y     | y <sup>++</sup> | y <sup>*</sup> | y <sup>+++</sup> | #  |
|----|-------|-----------------|----------------|------------------|-------|-----------------|----------------|------------------|------|-------|-----------------|----------------|------------------|----|
| 1  | 101.1 | 51.1            | 84.1           | 42.5             | 129.1 | 65.1            | 112.1          | 56.5             | K    |       |                 |                |                  | 10 |
| 2  | 158.1 | 79.6            | 141.1          | 71.1             | 186.1 | 93.6            | 169.1          | 85.1             | G    | 969.4 | 485.2           | 952.4          | 476.7            | 9  |
| 3  | 273.2 | 137.1           | 256.1          | 128.6            | 301.2 | 151.1           | 284.1          | 142.6            | D    | 912.4 | 456.7           | 895.4          | 448.2            | 8  |
| 4  | 386.2 | 193.6           | 369.2          | 185.1            | 414.2 | 207.6           | 397.2          | 199.1            | L    | 797.4 | 399.2           | 780.4          | 390.7            | 7  |
| 5  | 501.3 | 251.1           | 484.2          | 242.6            | 529.3 | 265.1           | 512.2          | 256.6            | D    | 684.3 | 342.7           | 667.3          | 334.1            | 6  |
| 6  | 682.3 | 341.6           | 665.3          | 333.1            | 710.3 | 355.6           | 693.2          | 347.1            | T    | 569.3 | 285.1           | 552.2          | 276.6            | 5  |
| 7  | 753.3 | 377.2           | 736.3          | 368.6            | 781.3 | 391.2           | 764.3          | 382.6            | A    | 388.3 | 194.6           | 371.2          | 186.1            | 4  |
| 8  | 824.4 | 412.7           | 807.3          | 404.2            | 852.3 | 426.7           | 835.3          | 418.2            | A    | 317.2 | 159.1           | 300.2          | 150.6            | 3  |
| 9  | 923.4 | 462.2           | 906.4          | 453.7            | 951.4 | 476.2           | 934.4          | 467.7            | V    | 246.2 | 123.6           | 229.2          | 115.1            | 2  |
| 10 |       |                 |                |                  |       |                 |                |                  | K    | 147.1 | 74.1            | 130.1          | 65.5             | 1  |

# Erk1m\_T1292

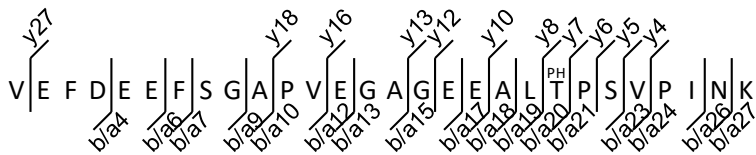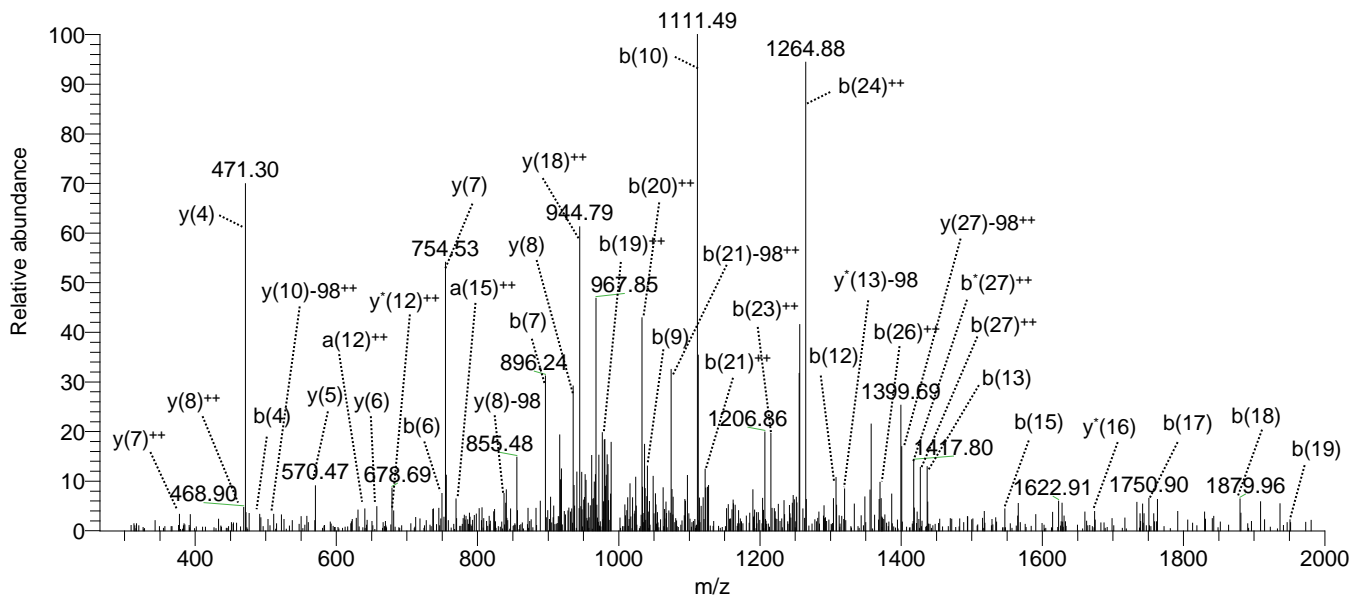

Match to Query 11653: 2997.348372 from(1000.123400,3+) intensity(71701.7266) rtinseconds(2936) rawfile(SN221365\_deTOP2B\_Erk1m\_1ul.raw) scans(9928) index(8092)

**Monoisotopic mass of neutral peptide Mr(calc):** 2997.3532

**Fixed modifications:** Carbamidomethyl (C) (apply to specified residues or termini only)

**Variable modifications:** T21 : Phospho (ST), with neutral losses 0.0000(shown in table), 97.9769

**Ions Score:** 40 **Expect:** 0.00073 **Matches :** 46/332 fragment ions using 85 most intense peaks

| #    | a      | a <sup>++</sup> | a <sup>*</sup> | a <sup>+++</sup> | b      | b <sup>++</sup> | b <sup>*</sup> | b <sup>+++</sup> | Seq. | y      | y <sup>++</sup> | y <sup>*</sup> | y <sup>+++</sup> | #    |
|------|--------|-----------------|----------------|------------------|--------|-----------------|----------------|------------------|------|--------|-----------------|----------------|------------------|------|
| 1.0  | 72.1   | 36.5            |                |                  | 100.1  | 50.5            |                |                  | V    |        |                 |                |                  | 28.0 |
| 2.0  | 201.1  | 101.1           |                |                  | 229.1  | 115.1           |                |                  | E    | 2899.3 | 1450.1          | 2882.3         | 1441.6           | 27.0 |
| 3.0  | 348.2  | 174.6           |                |                  | 376.2  | 188.6           |                |                  | F    | 2770.2 | 1385.6          | 2753.2         | 1377.1           | 26.0 |
| 4.0  | 463.2  | 232.1           |                |                  | 491.2  | 246.1           |                |                  | D    | 2623.2 | 1312.1          | 2606.2         | 1303.6           | 25.0 |
| 5.0  | 592.3  | 296.6           |                |                  | 620.3  | 310.6           |                |                  | E    | 2508.2 | 1254.6          | 2491.1         | 1246.1           | 24.0 |
| 6.0  | 721.3  | 361.2           |                |                  | 749.3  | 375.2           |                |                  | E    | 2379.1 | 1190.1          | 2362.1         | 1181.5           | 23.0 |
| 7.0  | 868.4  | 434.7           |                |                  | 896.4  | 448.7           |                |                  | F    | 2250.1 | 1125.5          | 2233.0         | 1117.0           | 22.0 |
| 8.0  | 955.4  | 478.2           |                |                  | 983.4  | 492.2           |                |                  | S    | 2103.0 | 1052.0          | 2086.0         | 1043.5           | 21.0 |
| 9.0  | 1012.4 | 506.7           |                |                  | 1040.4 | 520.7           |                |                  | G    | 2016.0 | 1008.5          | 1998.9         | 1000.0           | 20.0 |
| 10.0 | 1083.5 | 542.2           |                |                  | 1111.5 | 556.2           |                |                  | A    | 1958.9 | 980.0           | 1941.9         | 971.5            | 19.0 |
| 11.0 | 1180.5 | 590.8           |                |                  | 1208.5 | 604.8           |                |                  | P    | 1887.9 | 944.5           | 1870.9         | 935.9            | 18.0 |
| 12.0 | 1279.6 | 640.3           |                |                  | 1307.6 | 654.3           |                |                  | V    | 1790.9 | 895.9           | 1773.8         | 887.4            | 17.0 |
| 13.0 | 1408.6 | 704.8           |                |                  | 1436.6 | 718.8           |                |                  | E    | 1691.8 | 846.4           | 1674.8         | 837.9            | 16.0 |
| 14.0 | 1465.6 | 733.3           |                |                  | 1493.6 | 747.3           |                |                  | G    | 1562.7 | 781.9           | 1545.7         | 773.4            | 15.0 |
| 15.0 | 1536.7 | 768.8           |                |                  | 1564.7 | 782.8           |                |                  | A    | 1505.7 | 753.4           | 1488.7         | 744.9            | 14.0 |
| 16.0 | 1593.7 | 797.4           |                |                  | 1621.7 | 811.4           |                |                  | G    | 1434.7 | 717.8           | 1417.7         | 709.3            | 13.0 |
| 17.0 | 1722.7 | 861.9           |                |                  | 1750.7 | 875.9           |                |                  | E    | 1377.7 | 689.3           | 1360.6         | 680.8            | 12.0 |
| 18.0 | 1851.8 | 926.4           |                |                  | 1879.8 | 940.4           |                |                  | E    | 1248.6 | 624.8           | 1231.6         | 616.3            | 11.0 |
| 19.0 | 1922.8 | 961.9           |                |                  | 1950.8 | 975.9           |                |                  | A    | 1119.6 | 560.3           | 1102.6         | 551.8            | 10.0 |
| 20.0 | 2035.9 | 1018.5          |                |                  | 2063.9 | 1032.5          |                |                  | L    | 1048.5 | 524.8           | 1031.5         | 516.3            | 9.0  |
| 21.0 | 2216.9 | 1109.0          |                |                  | 2244.9 | 1123.0          |                |                  | T    | 935.5  | 468.2           | 918.4          | 459.7            | 8.0  |
| 22.0 | 2314.0 | 1157.5          |                |                  | 2342.0 | 1171.5          |                |                  | P    | 754.4  | 377.7           | 737.4          | 369.2            | 7.0  |
| 23.0 | 2401.0 | 1201.0          |                |                  | 2429.0 | 1215.0          |                |                  | S    | 657.4  | 329.2           | 640.4          | 320.7            | 6.0  |
| 24.0 | 2500.1 | 1250.5          |                |                  | 2528.1 | 1264.5          |                |                  | V    | 570.4  | 285.7           | 553.3          | 277.2            | 5.0  |
| 25.0 | 2597.1 | 1299.1          |                |                  | 2625.1 | 1313.1          |                |                  | P    | 471.3  | 236.1           | 454.3          | 227.6            | 4.0  |
| 26.0 | 2710.2 | 1355.6          |                |                  | 2738.2 | 1369.6          |                |                  | I    | 374.2  | 187.6           | 357.2          | 179.1            | 3.0  |
| 27.0 | 2824.3 | 1412.6          | 2807.2         | 1404.1           | 2852.3 | 1426.6          | 2835.2         | 1418.1           | N    | 261.2  | 131.1           | 244.1          | 122.6            | 2.0  |
| 28.0 |        |                 |                |                  |        |                 |                |                  | K    | 147.1  | 74.1            | 130.1          | 65.5             | 1.0  |

## All matches to this query

| Score | Mr(calc) | Delta   | Site Analysis      |
|-------|----------|---------|--------------------|
| 39.9  | 2997.353 | -0.0049 | Phospho T21 90.98% |
| 29.8  | 2997.353 | -0.0049 | Phospho S23 8.91%  |
| 10.8  | 2997.353 | -0.0049 | Phospho S8 0.11%   |

# Erk2m\_T1292

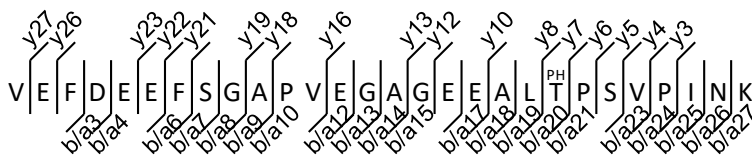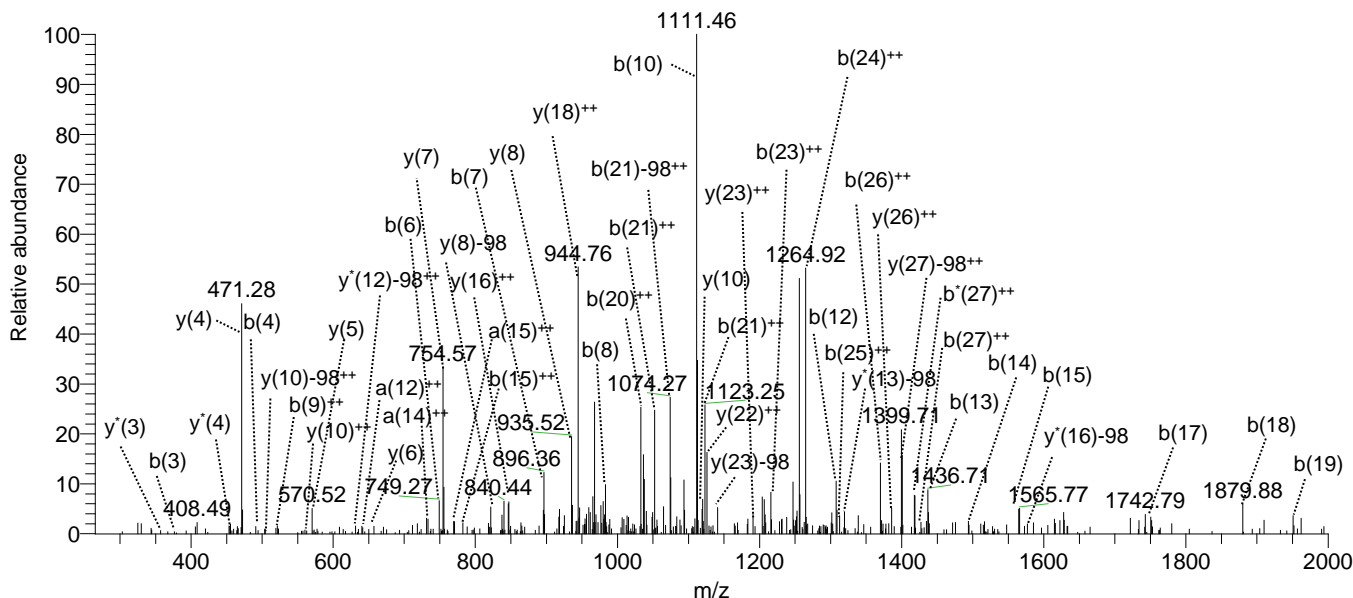

Match to Query 11387: 2997.351552 from(1000.124460,3+) intensity(543952.3750) rtinseconds(2940) rawfile(Z:\%SN22%SN221366\_deTOP2B\_Erk2m\_1ul.raw) scans(9948) index(8112)  
 Title: SpectrumID: "8131"; File: "SN221366\_deTOP2B\_Erk2m\_1ul.raw"

**Monoisotopic mass of neutral peptide Mr(calc):** 2997.3532

**Fixed modifications:** Carbamidomethyl (C) (apply to specified residues or termini only)

**Variable modifications:** T21 : Phospho (ST), with neutral losses 0.0000(shown in table), 97.9769

**Ions Score:** 55 **Expect:** 7.8e-05 **Matches :** 65/332 fragment ions using 133 most intense peaks

| #  | a      | a <sup>++</sup> | a <sup>*</sup> | a <sup>+++</sup> | b      | b <sup>++</sup> | b <sup>*</sup> | b <sup>+++</sup> | Seq. | y      | y <sup>++</sup> | y <sup>*</sup> | y <sup>+++</sup> | #  |
|----|--------|-----------------|----------------|------------------|--------|-----------------|----------------|------------------|------|--------|-----------------|----------------|------------------|----|
| 1  | 72.1   | 36.5            |                |                  | 100.1  | 50.5            |                |                  | V    |        |                 |                |                  | 28 |
| 2  | 201.1  | 101.1           |                |                  | 229.1  | 115.1           |                |                  | E    | 2899.3 | 1450.1          | 2882.3         | 1441.6           | 27 |
| 3  | 348.2  | 174.6           |                |                  | 376.2  | 188.6           |                |                  | F    | 2770.2 | 1385.6          | 2753.2         | 1377.1           | 26 |
| 4  | 463.2  | 232.1           |                |                  | 491.2  | 246.1           |                |                  | D    | 2623.2 | 1312.1          | 2606.2         | 1303.6           | 25 |
| 5  | 592.3  | 296.6           |                |                  | 620.3  | 310.6           |                |                  | E    | 2508.2 | 1254.6          | 2491.1         | 1246.1           | 24 |
| 6  | 721.3  | 361.2           |                |                  | 749.3  | 375.2           |                |                  | E    | 2379.1 | 1190.1          | 2362.1         | 1181.5           | 23 |
| 7  | 868.4  | 434.7           |                |                  | 896.4  | 448.7           |                |                  | F    | 2250.1 | 1125.5          | 2233.0         | 1117.0           | 22 |
| 8  | 955.4  | 478.2           |                |                  | 983.4  | 492.2           |                |                  | S    | 2103.0 | 1052.0          | 2086.0         | 1043.5           | 21 |
| 9  | 1012.4 | 506.7           |                |                  | 1040.4 | 520.7           |                |                  | G    | 2016.0 | 1008.5          | 1998.9         | 1000.0           | 20 |
| 10 | 1083.5 | 542.2           |                |                  | 1111.5 | 556.2           |                |                  | A    | 1958.9 | 980.0           | 1941.9         | 971.5            | 19 |
| 11 | 1180.5 | 590.8           |                |                  | 1208.5 | 604.8           |                |                  | P    | 1887.9 | 944.5           | 1870.9         | 935.9            | 18 |
| 12 | 1279.6 | 640.3           |                |                  | 1307.6 | 654.3           |                |                  | V    | 1790.9 | 895.9           | 1773.8         | 887.4            | 17 |
| 13 | 1408.6 | 704.8           |                |                  | 1436.6 | 718.8           |                |                  | E    | 1691.8 | 846.4           | 1674.8         | 837.9            | 16 |
| 14 | 1465.6 | 733.3           |                |                  | 1493.6 | 747.3           |                |                  | G    | 1562.7 | 781.9           | 1545.7         | 773.4            | 15 |
| 15 | 1536.7 | 768.8           |                |                  | 1564.7 | 782.8           |                |                  | A    | 1505.7 | 753.4           | 1488.7         | 744.9            | 14 |
| 16 | 1593.7 | 797.4           |                |                  | 1621.7 | 811.4           |                |                  | G    | 1434.7 | 717.8           | 1417.7         | 709.3            | 13 |
| 17 | 1722.7 | 861.9           |                |                  | 1750.7 | 875.9           |                |                  | E    | 1377.7 | 689.3           | 1360.6         | 680.8            | 12 |
| 18 | 1851.8 | 926.4           |                |                  | 1879.8 | 940.4           |                |                  | E    | 1248.6 | 624.8           | 1231.6         | 616.3            | 11 |
| 19 | 1922.8 | 961.9           |                |                  | 1950.8 | 975.9           |                |                  | A    | 1119.6 | 560.3           | 1102.6         | 551.8            | 10 |
| 20 | 2035.9 | 1018.5          |                |                  | 2063.9 | 1032.5          |                |                  | L    | 1048.5 | 524.8           | 1031.5         | 516.3            | 9  |
| 21 | 2216.9 | 1109.0          |                |                  | 2244.9 | 1123.0          |                |                  | T    | 935.5  | 468.2           | 918.4          | 459.7            | 8  |
| 22 | 2314.0 | 1157.5          |                |                  | 2342.0 | 1171.5          |                |                  | P    | 754.4  | 377.7           | 737.4          | 369.2            | 7  |
| 23 | 2401.0 | 1201.0          |                |                  | 2429.0 | 1215.0          |                |                  | S    | 657.4  | 329.2           | 640.4          | 320.7            | 6  |
| 24 | 2500.1 | 1250.5          |                |                  | 2528.1 | 1264.5          |                |                  | V    | 570.4  | 285.7           | 553.3          | 277.2            | 5  |
| 25 | 2597.1 | 1299.1          |                |                  | 2625.1 | 1313.1          |                |                  | P    | 471.3  | 236.1           | 454.3          | 227.6            | 4  |
| 26 | 2710.2 | 1355.6          |                |                  | 2738.2 | 1369.6          |                |                  | I    | 374.2  | 187.6           | 357.2          | 179.1            | 3  |
| 27 | 2824.3 | 1412.6          | 2807.2         | 1404.1           | 2852.3 | 1426.6          | 2835.2         | 1418.1           | N    | 261.2  | 131.1           | 244.1          | 122.6            | 2  |
| 28 |        |                 |                |                  |        |                 |                |                  | K    | 147.1  | 74.1            | 130.1          | 65.5             | 1  |

## All matches to this query

| Score | Mr(calc) | Delta   | Site Analysis      |
|-------|----------|---------|--------------------|
| 54.6  | 2997.353 | -0.0017 | Phospho T21 83.30% |
| 47.6  | 2997.353 | -0.0017 | Phospho S23 16.70% |
