# Supplementary material for: ERK2-topoisomerase II regulatory axis is important for gene activation in immediate early genes
Source: Springer Nature journal article supplement (doi:10.1038/s41467-023-44089-y), 2023-12-14
Supplement: 41467_2023_44089_MOESM10_ESM.pdf [file 41467_2023_44089_MOESM10_ESM.pdf]

# Mascot Search Results

User : r-nakagawa  
 Email :  
 Search title : SN221362\_deTOP2B\_control\_lul\_Node:2  
 MS data file : File Name: Z:\SN221362\_deTOP2B\_control\_lul.raw; File Path: : File Time: 3/1/2023 7:06:29 AM; File Size: 352609374 [Byte]  
 Database 1 : cRAP STRAV\_proteinG\_20230313 (118 sequences: 39090 residues)  
 Database 2 : Original\_21\_21\_TOP2B\_1-566\_20210618 (1 sequences: 589 residues)  
 Database 3 : Uniprot\_Proteome\_E.coli\_K12\_Proteome\_E.coli\_K12\_UP000000625\_2022\_01 (4448 sequences: 1358110 residues)  
 Timestamp : 13 Sep 2023 at 00:22:17 GMT  
 Enzyme : Trypsin  
 Fixed modifications : Carbamidomethyl (C)  
 Variable modifications : Acetyl (Protein N-term), Oxidation (M), Phospho (ST), Phospho (Y)  
 Mass values :  
 Protein Mass : Unrestricted  
 Peptide Mass Tolerance : ± 10 ppm  
 Fragment Mass Tolerance : ± 0.8 Da  
 Max Missed Cleavages : 3  
 Instrument type : Default  
 Number of queries : 14029  
 Protein hits :

2::TOP2B\_1-566  
 1::sp|TRYP\_PIG|  
 1::sp|K2C1\_HUMAN|  
 1::sp|K1C10\_HUMAN|  
 3::P0AAZ5|THIO\_EC01|  
 1::sp|ALBU\_BOVIN|  
 1::sp|K2E\_HUMAN|  
 3::P76298|FLHA\_EC01|  
 3::P0AD96|LIVJ\_EC01|  
 3::P39220|YABP\_EC01|  
 3::P0AFB5|NTRB\_EC01|  
 3::Q06065|ATOC\_EC01|  
 3::P69741|HYB0\_EC01|  
 3::P39220|YABP\_EC01|  
 3::P06149|DLDD\_EC01|  
 3::P28722|YHCA\_EC01|  
 3::Q46857|DKGA\_EC01|  
 3::P28630|HOLA\_EC01|  
 1::sp|RS27A\_HUMAN|  
 3::Q46793|YGEN\_EC01|  
 3::P0A930|YPMF\_EC01|  
 3::P15877|DHG\_EC01|  
 3::P69797|P1NAB\_EC01|  
 3::P75882|GFCD\_EC01|  
 3::P04152|UMUG\_EC01|  
 3::P20986|PTFC\_EC01|  
 3::P77739|Y13K\_EC01|  
 3::P31829|YDOL\_EC01|  
 3::P0A069|GNLQ\_EC01|  
 3::P0A8N3|SYK1\_EC01|  
 3::P76550|EUT0\_EC01|  
 3::P0A1X9|MALF\_EC01|  
 3::Q46861|YGIO\_EC01|  
 3::P0AGY1|YDJA\_EC01|  
 3::P63924|SMHA\_EC01|  
 3::V9H702|YPMF\_EC01|  
 3::P0A8H5|HSLU\_EC01|  
 3::P02943|LAMB\_EC01|  
 3::P52101|GLRK\_EC01|  
 3::P68644|Y1XG\_EC01|  
 3::P77766|RNAAM\_EC01|  
 3::P06045|SSUD\_EC01|  
 3::P75893|YDOL\_EC01|  
 3::P38035|K1CR\_EC01|  
 3::P0AEM0|FKBX\_EC01|  
 3::P0A088|GMAD\_EC01|  
 3::AOA/H2C769|AOA/H2C769\_EC01|  
 3::P0A840|SURE\_EC01|  
 3::P21893|RECQ\_EC01|  
 3::E30852|SMF\_EC01|  
 3::P38035|K1CR\_EC01|  
 3::P23871|HEMH\_EC01|  
 3::P00683|PPB\_EC01|  
 3::Q46864|MQSA\_EC01|  
 1::sp|DHE3\_BOVIN|  
 3::P0A624|SPO1\_EC01|  
 3::E37650|BCSC\_EC01|  
 3::P77293|GTRB\_EC01|  
 3::P36678|GSPM\_EC01|  
 3::P16869|FHUE\_EC01|  
 3::P76161|REO2\_EC01|  
 3::P64570|YQGC\_EC01|  
 3::P77732|RHMIR\_EC01|  
 3::P38035|K1CR\_EC01|  
 3::P75977|YMF0\_EC01|  
 3::P77658|YNA4\_EC01|  
 3::P0A7R9|RS1T\_EC01|  
 3::P00957|SYA\_EC01|  
 3::P07813|SY1\_EC01|  
 3::P0A023|CUSR\_EC01|  
 3::P24216|UXUA\_EC01|  
 3::P38134|Y1XG\_EC01|  
 3::P0ADI3|YGLM\_EC01|  
 3::P0AFA2|NARX\_EC01|  
 3::P70099|B1SG\_EC01|  
 3::P33362|YEHZ\_EC01|  
 3::P39358|YJHG\_EC01|  
 TOP2B\_1-566  
 sp|TRYP\_PIG|  
 sp|K2C1\_HUMAN|  
 sp|K1C10\_HUMAN|  
 Thioredoxin 1 OS=Escherichia coli (strain K12) OX=83333 GN=trxA PE=1 SV=2  
 sp|ALBU\_BOVIN|  
 sp|K2E\_HUMAN|  
 Flagellar biosynthesis protein FlaH OS=Escherichia coli (strain K12) OX=83333 GN=flaH PE=3 SV=1  
 Leu/Ile/Val-binding protein OS=Escherichia coli (strain K12) OX=83333 GN=livJ PE=1 SV=1  
 Protein YabP OS=Escherichia coli (strain K12) OX=83333 GN=yabP PE=4 SV=2  
 Sensory histidine kinase/phosphatase NtrB OS=Escherichia coli (strain K12) OX=83333 GN=ntrB PE=1 SV=1  
 Regulatory protein AtoC OS=Escherichia coli (strain K12) OX=83333 GN=atoC PE=1 SV=2  
 Hydrogenase-2, small chain OS=Escherichia coli (strain K12) OX=83333 GN=hyb0 PE=1 SV=1  
 Multiphosphoryl transfer protein 1 OS=Escherichia coli (strain K12) OX=83333 GN=fryA PE=1 SV=3  
 Quinone-dependent D-lactate dehydrogenase OS=Escherichia coli (strain K12) OX=83333 GN=ddl PE=1 SV=3  
 Uncharacterized fimbrial chaperone YhcA OS=Escherichia coli (strain K12) OX=83333 GN=yhcA PE=3 SV=2  
 2,5-diketo-D-gluconic acid reductase A OS=Escherichia coli (strain K12) OX=83333 GN=dkgA PE=1 SV=3  
 DNA polymerase III subunit delta OS=Escherichia coli (strain K12) OX=83333 GN=hoIA PE=1 SV=1  
 sp|RS27A\_HUMAN|  
 Putative uncharacterized protein YgeN OS=Escherichia coli (strain K12) OX=83333 GN=ygeN PE=5 SV=3  
 Murein D0-endopeptidase MepM OS=Escherichia coli (strain K12) OX=83333 GN=mepM PE=1 SV=1  
 Quinoprotein glucose dehydrogenase OS=Escherichia coli (strain K12) OX=83333 GN=gcd PE=1 SV=2  
 PTS system mannose-specific EIIB component OS=Escherichia coli (strain K12) OX=83333 GN=manX PE=1 SV=2  
 Uncharacterized lipoprotein Gfcd OS=Escherichia coli (strain K12) OX=83333 GN=gfcd PE=3 SV=1  
 Protein UmuC OS=Escherichia coli (strain K12) OX=83333 GN=umuC PE=1 SV=2  
 PTS system fructose-specific EIIB' BC component OS=Escherichia coli (strain K12) OX=83333 GN=fruA PE=1 SV=1  
 Probable ketonase YniA OS=Escherichia coli (strain K12) OX=83333 GN=yniA PE=3 SV=1  
 Probable zinc protease Pqol OS=Escherichia coli (strain K12) OX=83333 GN=pqol PE=1 SV=2  
 HTH-type transcriptional regulator GntR OS=Escherichia coli (strain K12) OX=83333 GN=gntR PE=1 SV=1  
 Lysine-tRNA ligase OS=Escherichia coli (strain K12) OX=83333 GN=lysS PE=1 SV=2  
 Acetate kinase Eut0 OS=Escherichia coli (strain K12) OX=83333 GN=eut0 PE=1 SV=1  
 Maltose/maltodextrin-binding periplasmic protein OS=Escherichia coli (strain K12) OX=83333 GN=malE PE=1 SV=1  
 UPF013 protein Ygi0 OS=Escherichia coli (strain K12) OX=83333 GN=ygi0 PE=3 SV=3  
 Putative NAD(P)H nitroreductase YdjA OS=Escherichia coli (strain K12) OX=83333 GN=ydjA PE=1 SV=1  
 Phosphoheptose isomerase OS=Escherichia coli (strain K12) OX=83333 GN=gmaA PE=1 SV=1  
 Uncharacterized protein YpaA OS=Escherichia coli (strain K12) OX=83333 GN=yypA PE=4 SV=1  
 ATP-dependent protease ATPase subunit HslU OS=Escherichia coli (strain K12) OX=83333 GN=hslU PE=1 SV=1  
 Maltoporin OS=Escherichia coli (strain K12) OX=83333 GN=lamB PE=1 SV=1  
 Sensor histidine kinase GlrK OS=Escherichia coli (strain K12) OX=83333 GN=glrK PE=1 SV=3  
 Protein FixC OS=Escherichia coli (strain K12) OX=83333 GN=fixC PE=3 SV=1  
 5'-3' exoribonuclease OS=Escherichia coli (strain K12) OX=83333 GN=yviV PE=1 SV=1  
 Alkanesulfonate monooxygenase OS=Escherichia coli (strain K12) OX=83333 GN=ssuD PE=1 SV=3  
 Lipoprotein-releasing system transmembrane protein LolE OS=Escherichia coli (strain K12) OX=83333 GN=lolE PE=1 SV=3  
 L-methionine/branched-chain amino acid exporter YjeH OS=Escherichia coli (strain K12) OX=83333 GN=yjeH PE=1 SV=1  
 FKBP-type 16 kDa peptidyl-prolyl cis-trans isomerase OS=Escherichia coli (strain K12) OX=83333 GN=fkpB PE=1 SV=2  
 GDP-mannose 4,6-dehydratase OS=Escherichia coli (strain K12) OX=83333 GN=gmd PE=1 SV=1  
 Putative type II secretion system C-type protein YghF OS=Escherichia coli (strain K12) OX=83333 GN=yghF PE=3 SV=1  
 5'/3'-nucleotidase SurE OS=Escherichia coli (strain K12) OX=83333 GN=surE PE=1 SV=1  
 Single-stranded-DNA-specific exonuclease RecJ OS=Escherichia coli (strain K12) OX=83333 GN=recJ PE=1 SV=2  
 Protein Smf OS=Escherichia coli (strain K12) OX=83333 GN=smf PE=3 SV=1  
 Uncharacterized protein YbbC OS=Escherichia coli (strain K12) OX=83333 GN=ybbC PE=2 SV=1  
 Transcriptional regulatory protein RtrC OS=Escherichia coli (strain K12) OX=83333 GN=rtrC PE=4 SV=2  
 Ferrochelatase OS=Escherichia coli (strain K12) OX=83333 GN=hemH PE=1 SV=3  
 Alkaline phosphatase OS=Escherichia coli (strain K12) OX=83333 GN=phoA PE=1 SV=1  
 Antitoxin MqsA OS=Escherichia coli (strain K12) OX=83333 GN=mqsA PE=1 SV=1  
 sp|DHE3\_BOVIN|  
 Bifunctional (p)pppp synthase/hydrolase SpoT OS=Escherichia coli (strain K12) OX=83333 GN=spoT PE=1 SV=1  
 Cellulose synthase operon protein C OS=Escherichia coli (strain K12) OX=83333 GN=bcsc PE=1 SV=3  
 L-methionine/branched-chain amino acid exporter YjeH OS=Escherichia coli (strain K12) OX=83333 GN=yjeH PE=1 SV=1  
 Prophage bacteriophage glucosyl transferase homolog OS=Escherichia coli (strain K12) OX=83333 GN=yfdH PE=1 SV=1  
 Putative type II secretion system protein M OS=Escherichia coli (strain K12) OX=83333 GN=gspM PE=2 SV=2  
 FhuE receptor OS=Escherichia coli (strain K12) OX=83333 GN=fhuE PE=1 SV=2  
 Prophage antitermination protein Q homolog QuuQ OS=Escherichia coli (strain K12) OX=83333 GN=quuQ PE=3 SV=2  
 Protein YggC OS=Escherichia coli (strain K12) OX=83333 GN=yggC PE=1 SV=1  
 Uncharacterized HTH-type transcriptional regulator RhmR OS=Escherichia coli (strain K12) OX=83333 GN=rhmR PE=1 SV=1  
 DNA ligase B OS=Escherichia coli (strain K12) OX=83333 GN=ligB PE=1 SV=2  
 Uncharacterized protein YmfM OS=Escherichia coli (strain K12) OX=83333 GN=yfmM PE=4 SV=1  
 Protein YnaA OS=Escherichia coli (strain K12) OX=83333 GN=ynaA PE=4 SV=1  
 30S ribosomal protein S11 OS=Escherichia coli (strain K12) OX=83333 GN=rpsK PE=1 SV=2  
 Alanine-tRNA ligase OS=Escherichia coli (strain K12) OX=83333 GN=alaS PE=1 SV=2  
 Leucine-tRNA ligase OS=Escherichia coli (strain K12) OX=83333 GN=leuS PE=1 SV=2  
 Transcriptional regulatory protein CusR OS=Escherichia coli (strain K12) OX=83333 GN=cusR PE=1 SV=1  
 Mannonate dehydratase OS=Escherichia coli (strain K12) OX=83333 GN=uxuA PE=1 SV=2  
 Tyrosine-protein kinase etk OS=Escherichia coli (strain K12) OX=83333 GN=etk PE=1 SV=2  
 Uncharacterized protein YgiM OS=Escherichia coli (strain K12) OX=83333 GN=ygiM PE=3 SV=1  
 Nitrate/nitrite sensor protein NarX OS=Escherichia coli (strain K12) OX=83333 GN=narX PE=1 SV=1  
 Biotin sulfoxide reductase OS=Escherichia coli (strain K12) OX=83333 GN=bisC PE=1 SV=3  
 Glycine betaine-binding protein YehZ OS=Escherichia coli (strain K12) OX=83333 GN=yehZ PE=1 SV=1  
 D-xylonate dehydratase YjhG OS=Escherichia coli (strain K12) OX=83333 GN=yjhG PE=1 SV=2

## Target Decoy. False discovery rate

Peptide matches above identity threshold 462 55 11.90 %  
 Peptide matches above homology or identity threshold 463 59 12.74 %

## Select Summary Report

Format As  Select Summary (protein hits)  [Help](#) [Help](#)  
 Significance threshold p <  Max. number of hits  Show Percolator scores   
 Standard scoring  MudPIT scoring  Display non-significant matches  Show sub-sets   
 Show pop-ups  Suppress pop-ups  Require bold red   
 Preferred taxonomy

Re-Search  All queries  Unassigned  Below homology threshold  Below identity threshold

1. 2::TOP2B\_1-566 Mass: 66629 Score: 8456 Matches: 341 (341) Sequences: 49 (49) emPAI: 40.10

| Query | Observed | Mr (expt) | Mr (calc) | ppm      | Miss  | Score | Expect | Rank     | Unique | Peptide                                           |
|-------|----------|-----------|-----------|----------|-------|-------|--------|----------|--------|---------------------------------------------------|
| 303   | 388      | 7291      | 775.4437  | 775.4439 | -0.27 | 1     | 17     | 0.02     | 1      | U K.TSEAKIK.H                                     |
| 410   | 401      | 7254      | 801.4362  | 801.4344 | 2.25  | 0     | 36     | 0.00031  | 1      | U K.AQTQLNK.K 408                                 |
| 480   | 410      | 7507      | 819.4868  | 819.4854 | 1.71  | 0     | 32     | 0.00057  | 1      | U K.IVGLQYK.K 476 477 479                         |
| 521   | 414      | 7815      | 827.5485  | 827.5480 | 0.57  | 1     | 26     | 0.0024   | 1      | U K.LIEVVKK.K                                     |
| 640   | 426      | 2421      | 850.4697  | 850.4701 | -0.46 | 0     | 35     | 0.00033  | 1      | U R.YGVFPLR.G 639 641 642 643 644 645 646 647 648 |
| 779   | 439      | 7585      | 877.5025  | 877.5022 | 0.38  | 0     | 28     | 0.002    | 1      | U K.GIPVVEHK.V 781                                |
| 988   | 459      | 7574      | 917.5003  | 917.5004 | -0.11 | 0     | 42     | 0.00012  | 1      | U K.DIVALMTR.R                                    |
| 1061  | 465      | 7719      | 929.5293  | 929.5294 | -0.12 | 1     | 32     | 0.00081  | 1      | U K.AQTQLNK.C 1060 1062                           |
| 1093  | 467      | 7551      | 933.4957  | 933.4953 | 0.41  | 0     | (32)   | 0.00084  | 1      | U K.DIVALMTR.R 1088 1089 1090 1091 1092           |
| 1154  | 473      | 2665      | 944.5185  | 944.5179 | 0.69  | 0     | 51     | 1.1e-005 | 1      | U K.LDETGVALK.V                                   |



|                      |          |           |           |       |   |    |          |   |   |                     |
|----------------------|----------|-----------|-----------|-------|---|----|----------|---|---|---------------------|
| <a href="#">2278</a> | 546.7549 | 1091.4953 | 1091.4956 | -0.26 | 0 | 28 | 0.0015   | 1 | U | R.GSGGGSSGGSSIGGR.G |
| <a href="#">2578</a> | 563.2767 | 1124.5389 | 1124.5349 | 3.50  | 0 | 40 | 0.00021  | 1 | U | K.AEAESLYQSK.Y      |
| <a href="#">3080</a> | 590.3038 | 1178.5931 | 1178.5931 | 0.00  | 0 | 28 | 0.0038   | 1 | U | K.YEELQITAGR.H      |
| <a href="#">4086</a> | 651.8613 | 1301.7079 | 1301.7078 | 0.09  | 0 | 49 | 2.6e-005 | 1 | U | R.SLDLDSIIAEVK.A    |
| <a href="#">4138</a> | 436.8899 | 1307.6479 | 1307.6469 | 0.75  | 2 | 45 | 9e-005   | 1 | U | R.NKYEDEINKR.T      |
| <a href="#">4688</a> | 692.3493 | 1382.6841 | 1382.6830 | 0.76  | 0 | 54 | 7.3e-006 | 1 | U | K.SLNNQFASFDK.V     |

4. [1::sp|K1C10\\_HUMAN|](#) Mass: 59711 Score: 161 Matches: 5(5) Sequences: 5(5) emPAI: 0.43

sp|K1C10\_HUMAN|

| Query                | Observed | Mr(expt)  | Mr(calc)  | ppm   | Miss | Score | Expect   | Rank | Unique | Peptide            |
|----------------------|----------|-----------|-----------|-------|------|-------|----------|------|--------|--------------------|
| <a href="#">433</a>  | 404.2033 | 806.3920  | 806.3923  | -0.29 | 0    | 27    | 0.0027   | 1    | U      | R.LAADDR.L         |
| <a href="#">441</a>  | 405.2239 | 808.4332  | 808.4330  | 0.18  | 0    | 14    | 0.037    | 1    | U      | R.LASYLDK.V        |
| <a href="#">3718</a> | 631.8024 | 1261.5902 | 1261.5899 | 0.24  | 0    | 40    | 0.00022  | 1    | U      | R.SLLEGEESGGGGGR.G |
| <a href="#">4563</a> | 683.3234 | 1364.6322 | 1364.6320 | 0.12  | 0    | 60    | 1.8e-006 | 1    | U      | R.SQYEQLAEQNR.K    |
| <a href="#">4673</a> | 691.3284 | 1380.6422 | 1380.6408 | 1.01  | 0    | 80    | 2.8e-008 | 1    | U      | R.ALEESNYELEGK.I   |

5. [3::P0AA25|THIO\\_ECOLI](#) Mass: 11913 Score: 127 Matches: 2(2) Sequences: 2(2) emPAI: 1.01

Thioredoxin 1 OS=Escherichia coli (strain K12) OX=83333 GN=trxA PE=1 SV=2

| Query                | Observed | Mr(expt)  | Mr(calc)  | ppm  | Miss | Score | Expect   | Rank | Unique | Peptide              |
|----------------------|----------|-----------|-----------|------|------|-------|----------|------|--------|----------------------|
| <a href="#">3771</a> | 634.3357 | 1266.6569 | 1266.6568 | 0.10 | 0    | 67    | 4e-007   | 1    | U      | K.LNIDQNPGTAPK.Y     |
| <a href="#">8495</a> | 903.4535 | 1804.8924 | 1804.8917 | 0.42 | 0    | 77    | 6.6e-008 | 1    | U      | K.MIAPILDEIADEYQGK.L |

6. [1::sp|ALBU\\_BOVIN|](#) Mass: 71244 Score: 125 Matches: 6(6) Sequences: 6(6) emPAI: 0.43

sp|ALBU\_BOVIN|

| Query                | Observed | Mr(expt)  | Mr(calc)  | ppm  | Miss | Score | Expect   | Rank | Unique | Peptide             |
|----------------------|----------|-----------|-----------|------|------|-------|----------|------|--------|---------------------|
| <a href="#">363</a>  | 395.2400 | 788.4654  | 788.4644  | 1.37 | 0    | 18    | 0.017    | 1    | U      | K.LVTDLTK.V         |
| <a href="#">468</a>  | 409.7170 | 817.4195  | 817.4181  | 1.72 | 0    | 23    | 0.0053   | 1    | U      | K.ATEEQLK.T         |
| <a href="#">1001</a> | 461.7478 | 921.4810  | 921.4807  | 0.31 | 0    | 27    | 0.0027   | 1    | U      | K.AEFVEVTK.L        |
| <a href="#">4116</a> | 653.3620 | 1304.7094 | 1304.7088 | 0.47 | 0    | 47    | 3.2e-005 | 1    | U      | K.HLVDEPQNLK.Q      |
| <a href="#">6450</a> | 784.3763 | 1566.7381 | 1566.7354 | 1.70 | 0    | 45    | 9.6e-005 | 1    | U      | K.DAFLGSFLYEYSR.R   |
| <a href="#">7012</a> | 547.3176 | 1638.9310 | 1638.9305 | 0.30 | 1    | 36    | 0.00024  | 1    | U      | R.KVPQVSTPTLVEYSR.S |

7. [1::sp|K22E\\_HUMAN|](#) Mass: 66110 Score: 102 Matches: 4(4) Sequences: 4(4) emPAI: 0.29

sp|K22E\_HUMAN|

| Query                | Observed | Mr(expt)  | Mr(calc)  | ppm  | Miss | Score | Expect  | Rank | Unique | Peptide            |
|----------------------|----------|-----------|-----------|------|------|-------|---------|------|--------|--------------------|
| <a href="#">1324</a> | 487.2693 | 972.5240  | 972.5240  | 0.06 | 0    | 33    | 0.00068 | 1    | U      | K.IEISELNR.V       |
| <a href="#">2398</a> | 554.2752 | 1108.5358 | 1106.5356 | 0.19 | 0    | 27    | 0.0023  | 1    | U      | K.AQYEEIAQR.S      |
| <a href="#">3178</a> | 398.8754 | 1193.6045 | 1193.6040 | 0.38 | 2    | 25    | 0.0046  | 1    | U      | K.KYDEEINKR.T      |
| <a href="#">3653</a> | 627.8076 | 1253.6007 | 1253.6001 | 0.49 | 0    | 59    | 3e-006  | 1    | U      | R.GFSSGSAVSVGGSR.R |

8. [3::P76298|FLHA\\_ECOLI](#) Mass: 74795 Score: 95 Matches: 12(12) Sequences: 1(1) emPAI: 0.06

Flagellar biosynthesis protein FlhA OS=Escherichia coli (strain K12) OX=83333 GN=flhA PE=3 SV=1

| Query                | Observed | Mr(expt)  | Mr(calc)  | ppm  | Miss | Score | Expect | Rank | Unique | Peptide                                                                                                                                       |
|----------------------|----------|-----------|-----------|------|------|-------|--------|------|--------|-----------------------------------------------------------------------------------------------------------------------------------------------|
| <a href="#">3743</a> | 632.8199 | 1263.6252 | 1263.6159 | 7.37 | 1    | 26    | 0.0045 | 1    | U      | R.HIRMTAIGGK. - <a href="#">3726</a> <a href="#">3735</a> <a href="#">3742</a> <a href="#">3746</a> <a href="#">3753</a> <a href="#">3756</a> |
| <a href="#">3755</a> | 632.8202 | 1263.6259 | 1263.6159 | 7.94 | 1    | (26)  | 0.0041 | 1    | U      | R.HIRMTAIGGK. - <a href="#">3734</a> <a href="#">3744</a> <a href="#">3748</a> <a href="#">3754</a>                                           |

9. [3::P0AD96|LIVJ\\_ECOLI](#) Mass: 39223 Score: 31 Matches: 1(1) Sequences: 1(1) emPAI: 0.11

Leu/Ile/Val-binding protein OS=Escherichia coli (strain K12) OX=83333 GN=livj PE=1 SV=1

| Query               | Observed | Mr(expt) | Mr(calc) | ppm  | Miss | Score | Expect  | Rank | Unique | Peptide      |
|---------------------|----------|----------|----------|------|------|-------|---------|------|--------|--------------|
| <a href="#">397</a> | 400.7352 | 799.4559 | 799.4552 | 0.85 | 0    | 31    | 0.00082 | 1    | U      | K.QAVAVANK.V |

Proteins matching the same set of peptides:

[3::P04816|LIVK\\_ECOLI](#) Mass: 39468 Score: 31 Matches: 1(1) Sequences: 1(1)

Leucine-specific-binding protein OS=Escherichia coli (strain K12) OX=83333 GN=livk PE=1 SV=2

10. [3::P39220|YARP\\_ECOLI](#) Mass: 24946 Score: 26 Matches: 2(2) Sequences: 2(2) emPAI: 0.40

Protein YabP OS=Escherichia coli (strain K12) OX=83333 GN=yabP PE=4 SV=2

| Query                | Observed | Mr(expt)  | Mr(calc)  | ppm   | Miss | Score | Expect | Rank | Unique | Peptide        |
|----------------------|----------|-----------|-----------|-------|------|-------|--------|------|--------|----------------|
| <a href="#">815</a>  | 443.2374 | 884.4602  | 884.4603  | -0.16 | 0    | 17    | 0.021  | 1    | U      | K.NPDELVAK.G   |
| <a href="#">4109</a> | 652.8180 | 1303.6214 | 1303.6213 | 0.05  | 0    | 23    | 0.009  | 1    | U      | K.FINSLLEFNK.L |

11. [3::P0AFB5|NTRB\\_ECOLI](#) Mass: 38532 Score: 26 Matches: 1(1) Sequences: 1(1) emPAI: 0.12

Sensory histidine kinase/phosphatase NtrB OS=Escherichia coli (strain K12) OX=83333 GN=gnL PE=1 SV=1

| Query              | Observed | Mr(expt) | Mr(calc) | ppm   | Miss | Score | Expect | Rank | Unique | Peptide     |
|--------------------|----------|----------|----------|-------|------|-------|--------|------|--------|-------------|
| <a href="#">89</a> | 363.7163 | 725.4180 | 725.4184 | -0.50 | 0    | 26    | 0.0027 | 1    | U      | K.NPLGGLR.G |

12. [3::Q06065|ATOC\\_ECOLI](#) Mass: 52428 Score: 25 Matches: 2(2) Sequences: 1(1) emPAI: 0.08

Regulatory protein AtoC OS=Escherichia coli (strain K12) OX=83333 GN=atoC PE=1 SV=2

| Query                | Observed | Mr(expt)  | Mr(calc)  | ppm  | Miss | Score | Expect | Rank | Unique | Peptide                             |
|----------------------|----------|-----------|-----------|------|------|-------|--------|------|--------|-------------------------------------|
| <a href="#">3733</a> | 422.2154 | 1263.6245 | 1263.6203 | 3.32 | 1    | 20    | 0.017  | 1    | U      | R.MPEMDGKALK.E <a href="#">3736</a> |

13. [3::P69741|NRHT\\_ECOLI](#) Mass: 40368 Score: 24 Matches: 1(1) Sequences: 1(1) emPAI: 0.11

Hydrogenase-2 small chain OS=Escherichia coli (strain K12) OX=83333 GN=hybD PE=1 SV=1

| Query                | Observed | Mr(expt)  | Mr(calc)  | ppm   | Miss | Score | Expect | Rank | Unique | Peptide               |
|----------------------|----------|-----------|-----------|-------|------|-------|--------|------|--------|-----------------------|
| <a href="#">9983</a> | 697.6294 | 2089.8665 | 2089.8689 | -1.13 | 1    | 24    | 0.014  | 1    | U      | R.DFMKLAALAAIMGLSSK.A |

14. [3::P77439|PTFX1\\_ECOLI](#) Mass: 92757 Score: 24 Matches: 1(1) Sequences: 1(1) emPAI: 0.05

Multiphosphoryl transfer protein 1 OS=Escherichia coli (strain K12) OX=83333 GN=fryA PE=1 SV=1

| Query                 | Observed | Mr(expt)  | Mr(calc)  | ppm  | Miss | Score | Expect | Rank | Unique | Peptide                     |
|-----------------------|----------|-----------|-----------|------|------|-------|--------|------|--------|-----------------------------|
| <a href="#">11359</a> | 849.0838 | 2544.2297 | 2544.2134 | 6.39 | 0    | 24    | 0.025  | 1    | U      | R.LMTEHQHGLGAAIISNMEQVCAK.L |

15. [3::P06149|DLD\\_ECOLI](#) Mass: 64914 Score: 24 Matches: 2(2) Sequences: 1(1) emPAI: 0.07

Quinone-dependent D-lactate dehydrogenase OS=Escherichia coli (strain K12) OX=83333 GN=dld PE=1 SV=3

| Query               | Observed | Mr(expt) | Mr(calc) | ppm   | Miss | Score | Expect | Rank | Unique | Peptide                         |
|---------------------|----------|----------|----------|-------|------|-------|--------|------|--------|---------------------------------|
| <a href="#">758</a> | 437.7350 | 873.4555 | 873.4556 | -0.11 | 1    | 23    | 0.008  | 1    | U      | K.LDDDRIK.D <a href="#">759</a> |

|       |                                                                                                              |              |           |               |                 |                                  |                                                                                      |
|-------|--------------------------------------------------------------------------------------------------------------|--------------|-----------|---------------|-----------------|----------------------------------|--------------------------------------------------------------------------------------|
| 16.   | <a href="#">3::P28722 YHCA_ECOLI</a>                                                                         | Mass: 25323  | Score: 23 | Matches: 1(1) | Sequences: 1(1) | emPAI: 0.18                      |                                                                                      |
|       | Uncharacterized fibrial chaperone YhcA OS=Escherichia coli (strain K12) OX=83333 GN=yhcA PE=3 SV=2           |              |           |               |                 |                                  |                                                                                      |
| Query | Observed                                                                                                     | Mr(expt)     | Mr(calc)  | ppm           | Miss            | Score Expect Rank Unique Peptide |                                                                                      |
|       | <a href="#">14028</a>                                                                                        | 999.8786     | 4994.3566 | 4994.3418     | 2.97            | 3 23 0.04 1 U                    | <a href="#">M_LRHIIFIVFITTSMNTLAI<del>G</del>MVPETS<del>V</del>LLVDEKRGESAINIK.N</a> |
| 17.   | <a href="#">3::Q46857 DKGA_ECOLI</a>                                                                         | Mass: 31147  | Score: 23 | Matches: 1(1) | Sequences: 1(1) | emPAI: 0.15                      |                                                                                      |
|       | 2,5-diketo-D-gluconic acid reductase A OS=Escherichia coli (strain K12) OX=83333 GN=dkgA PE=1 SV=3           |              |           |               |                 |                                  |                                                                                      |
| Query | Observed                                                                                                     | Mr(expt)     | Mr(calc)  | ppm           | Miss            | Score Expect Rank Unique Peptide |                                                                                      |
|       | <a href="#">1066</a>                                                                                         | 466.2461     | 930.4777  | 930.4844      | -7.23           | 0 23 0.0054 1 U                  | <a href="#">-<del>M</del>ANPTVIK.L</a>                                               |
| 18.   | <a href="#">3::P28630 HOLA_ECOLI</a>                                                                         | Mass: 38965  | Score: 23 | Matches: 1(1) | Sequences: 1(1) | emPAI: 0.12                      |                                                                                      |
|       | DNA polymerase III subunit delta OS=Escherichia coli (strain K12) OX=83333 GN=holA PE=1 SV=1                 |              |           |               |                 |                                  |                                                                                      |
| Query | Observed                                                                                                     | Mr(expt)     | Mr(calc)  | ppm           | Miss            | Score Expect Rank Unique Peptide |                                                                                      |
|       | <a href="#">1049</a>                                                                                         | 464.7828     | 927.5509  | 927.5502      | 0.85            | 0 23 0.0059 1 U                  | <a href="#">R.QAVQLLR.T</a>                                                          |
| 19.   | <a href="#">1::sp RS27A_HUMAN </a>                                                                           | Mass: 18296  | Score: 22 | Matches: 1(1) | Sequences: 1(1) | emPAI: 0.26                      |                                                                                      |
|       | sp RS27A_HUMAN                                                                                               |              |           |               |                 |                                  |                                                                                      |
| Query | Observed                                                                                                     | Mr(expt)     | Mr(calc)  | ppm           | Miss            | Score Expect Rank Unique Peptide |                                                                                      |
|       | <a href="#">8272</a>                                                                                         | 894.4670     | 1786.9194 | 1786.9200     | -0.32           | 0 22 0.022 1 U                   | <a href="#">K.TITLEVEPSDTIENVK.A</a>                                                 |
| 20.   | <a href="#">3::Q46793 YGEN_ECOLI</a>                                                                         | Mass: 27575  | Score: 21 | Matches: 1(1) | Sequences: 1(1) | emPAI: 0.17                      |                                                                                      |
|       | Putative uncharacterized protein YgeN OS=Escherichia coli (strain K12) OX=83333 GN=ygeN PE=5 SV=3            |              |           |               |                 |                                  |                                                                                      |
| Query | Observed                                                                                                     | Mr(expt)     | Mr(calc)  | ppm           | Miss            | Score Expect Rank Unique Peptide |                                                                                      |
|       | <a href="#">6063</a>                                                                                         | 765.8946     | 1529.7746 | 1529.7710     | 2.36            | 3 21 0.021 1 U                   | <a href="#">-<del>M</del>RKKIEMSLIK.S</a>                                            |
| 21.   | <a href="#">3::POAFS9 MEPM_ECOLI</a>                                                                         | Mass: 49027  | Score: 20 | Matches: 1(1) | Sequences: 1(1) | emPAI: 0.09                      |                                                                                      |
|       | Murein DD-endopeptidase MepM OS=Escherichia coli (strain K12) OX=83333 GN=mepM PE=1 SV=1                     |              |           |               |                 |                                  |                                                                                      |
| Query | Observed                                                                                                     | Mr(expt)     | Mr(calc)  | ppm           | Miss            | Score Expect Rank Unique Peptide |                                                                                      |
|       | <a href="#">8884</a>                                                                                         | 620.6257     | 1858.8553 | 1858.8703     | -8.07           | 2 20 0.039 1 U                   | <a href="#">R.EQS<del>Q</del>LLGVRLR<del>S</del>EGK.D</a>                            |
| 22.   | <a href="#">3::P15877 DHG_ECOLI</a>                                                                          | Mass: 87091  | Score: 20 | Matches: 1(1) | Sequences: 1(1) | emPAI: 0.05                      |                                                                                      |
|       | Quinoprotein glucose dehydrogenase OS=Escherichia coli (strain K12) OX=83333 GN=gcd PE=1 SV=3                |              |           |               |                 |                                  |                                                                                      |
| Query | Observed                                                                                                     | Mr(expt)     | Mr(calc)  | ppm           | Miss            | Score Expect Rank Unique Peptide |                                                                                      |
|       | <a href="#">1603</a>                                                                                         | 507.2217     | 1012.4289 | 1012.4284     | 0.54            | 0 20 0.0099 1 U                  | <a href="#">R.AYNMSNGEK.L</a>                                                        |
| 23.   | <a href="#">3::P69797 PTNAB_ECOLI</a>                                                                        | Mass: 35026  | Score: 20 | Matches: 1(1) | Sequences: 1(1) | emPAI: 0.13                      |                                                                                      |
|       | PTS system mannose-specific EIIB' component OS=Escherichia coli (strain K12) OX=83333 GN=manX PE=1 SV=2      |              |           |               |                 |                                  |                                                                                      |
| Query | Observed                                                                                                     | Mr(expt)     | Mr(calc)  | ppm           | Miss            | Score Expect Rank Unique Peptide |                                                                                      |
|       | <a href="#">6062</a>                                                                                         | 765.8940     | 1529.7735 | 1529.7598     | 8.98            | 2 20 0.028 1 U                   | <a href="#">K.LK<del>M</del>DLI<del>S</del>KIDK.-</a>                                |
| 24.   | <a href="#">3::P75882 GFCD_ECOLI</a>                                                                         | Mass: 78923  | Score: 20 | Matches: 2(2) | Sequences: 1(1) | emPAI: 0.06                      |                                                                                      |
|       | Uncharacterized lipoprotein GfdC OS=Escherichia coli (strain K12) OX=83333 GN=gfdC PE=3 SV=1                 |              |           |               |                 |                                  |                                                                                      |
| Query | Observed                                                                                                     | Mr(expt)     | Mr(calc)  | ppm           | Miss            | Score Expect Rank Unique Peptide |                                                                                      |
|       | <a href="#">1642</a>                                                                                         | 509.2826     | 1016.5505 | 1016.5502     | 0.33            | 1 19 0.019 1 U                   | <a href="#">K.DKGATIDVAK.R</a> <a href="#">1642</a>                                  |
| 25.   | <a href="#">3::PO4152 UMUC_ECOLI</a>                                                                         | Mass: 48276  | Score: 20 | Matches: 1(1) | Sequences: 1(1) | emPAI: 0.09                      |                                                                                      |
|       | Protein UmuC OS=Escherichia coli (strain K12) OX=83333 GN=umuC PE=1 SV=2                                     |              |           |               |                 |                                  |                                                                                      |
| Query | Observed                                                                                                     | Mr(expt)     | Mr(calc)  | ppm           | Miss            | Score Expect Rank Unique Peptide |                                                                                      |
|       | <a href="#">765</a>                                                                                          | 437.2432     | 872.4719  | 872.4716      | 0.42            | 0 20 0.017 1 U                   | <a href="#">R.DIINAATR.S</a>                                                         |
| 26.   | <a href="#">3::P20966 PTFBC_ECOLI</a>                                                                        | Mass: 57824  | Score: 19 | Matches: 1(1) | Sequences: 1(1) | emPAI: 0.08                      |                                                                                      |
|       | PTS system fructose-specific EIIB' BC component OS=Escherichia coli (strain K12) OX=83333 GN=fruA PE=1 SV=1  |              |           |               |                 |                                  |                                                                                      |
| Query | Observed                                                                                                     | Mr(expt)     | Mr(calc)  | ppm           | Miss            | Score Expect Rank Unique Peptide |                                                                                      |
|       | <a href="#">419</a>                                                                                          | 402.7089     | 803.4032  | 803.4025      | 0.90            | 0 19 0.011 1 U                   | <a href="#">K.TAQELDK.A</a>                                                          |
| 27.   | <a href="#">3::P77739 KT3K_ECOLI</a>                                                                         | Mass: 32666  | Score: 19 | Matches: 1(1) | Sequences: 1(1) | emPAI: 0.14                      |                                                                                      |
|       | Probable ketoamine kinase YniA OS=Escherichia coli (strain K12) OX=83333 GN=yniA PE=3 SV=1                   |              |           |               |                 |                                  |                                                                                      |
| Query | Observed                                                                                                     | Mr(expt)     | Mr(calc)  | ppm           | Miss            | Score Expect Rank Unique Peptide |                                                                                      |
|       | <a href="#">1083</a>                                                                                         | 467.2354     | 932.4562  | 932.4538      | 2.57            | 0 19 0.011 1 U                   | <a href="#">-<del>M</del>WQAI<del>S</del>R.L</a>                                     |
| 28.   | <a href="#">3::P31828 PQQL_ECOLI</a>                                                                         | Mass: 104706 | Score: 19 | Matches: 1(1) | Sequences: 1(1) | emPAI: 0.04                      |                                                                                      |
|       | Probable zinc protease PqqL OS=Escherichia coli (strain K12) OX=83333 GN=pqqL PE=1 SV=2                      |              |           |               |                 |                                  |                                                                                      |
| Query | Observed                                                                                                     | Mr(expt)     | Mr(calc)  | ppm           | Miss            | Score Expect Rank Unique Peptide |                                                                                      |
|       | <a href="#">4857</a>                                                                                         | 707.3304     | 1412.6462 | 1412.6371     | 6.48            | 0 19 0.023 1 U                   | <a href="#">K.QMIVENVNTAVK.Q</a>                                                     |
| 29.   | <a href="#">3::POACP5 GNTR_ECOLI</a>                                                                         | Mass: 36570  | Score: 19 | Matches: 1(1) | Sequences: 1(1) | emPAI: 0.12                      |                                                                                      |
|       | HTH-type transcriptional regulator GntR OS=Escherichia coli (strain K12) OX=83333 GN=gntR PE=1 SV=1          |              |           |               |                 |                                  |                                                                                      |
| Query | Observed                                                                                                     | Mr(expt)     | Mr(calc)  | ppm           | Miss            | Score Expect Rank Unique Peptide |                                                                                      |
|       | <a href="#">664</a>                                                                                          | 428.7663     | 855.5179  | 855.5178      | 0.18            | 0 19 0.012 1 U                   | <a href="#">R.LASVLT<del>P</del>R.E</a>                                              |
| 30.   | <a href="#">3::POA8N3 SYK1_ECOLI</a>                                                                         | Mass: 57624  | Score: 19 | Matches: 2(2) | Sequences: 2(2) | emPAI: 0.16                      |                                                                                      |
|       | Lysine--tRNA ligase OS=Escherichia coli (strain K12) OX=83333 GN=lysS PE=1 SV=2                              |              |           |               |                 |                                  |                                                                                      |
| Query | Observed                                                                                                     | Mr(expt)     | Mr(calc)  | ppm           | Miss            | Score Expect Rank Unique Peptide |                                                                                      |
|       | <a href="#">2234</a>                                                                                         | 363.2009     | 1086.5810 | 1086.5710     | 9.24            | 0 19 0.02 1 U                    | <a href="#">K.WDLGILGAK.G</a>                                                        |
|       | <a href="#">2613</a>                                                                                         | 376.8961     | 1127.6663 | 1127.6775     | -9.89           | 1 14 0.044 2 U                   | <a href="#">K.VRSQILSGIR.Q</a>                                                       |
| 31.   | <a href="#">3::P76555 EUTQ_ECOLI</a>                                                                         | Mass: 25516  | Score: 19 | Matches: 1(1) | Sequences: 1(1) | emPAI: 0.18                      |                                                                                      |
|       | Acetate kinase EutQ OS=Escherichia coli (strain K12) OX=83333 GN=eutQ PE=1 SV=1                              |              |           |               |                 |                                  |                                                                                      |
| Query | Observed                                                                                                     | Mr(expt)     | Mr(calc)  | ppm           | Miss            | Score Expect Rank Unique Peptide |                                                                                      |
|       | <a href="#">8326</a>                                                                                         | 896.4427     | 1790.8708 | 1790.8580     | 7.13            | 2 19 0.048 1 U                   | <a href="#">K.<del>S</del>VIGKGGI<del>K</del>VIDGSSVK.F</a>                          |
| 32.   | <a href="#">3::POAEX9 MALE_ECOLI</a>                                                                         | Mass: 43360  | Score: 19 | Matches: 1(1) | Sequences: 1(1) | emPAI: 0.10                      |                                                                                      |
|       | Maltose/maltodextrin-binding periplasmic protein OS=Escherichia coli (strain K12) OX=83333 GN=malE PE=1 SV=1 |              |           |               |                 |                                  |                                                                                      |
| Query | Observed                                                                                                     | Mr(expt)     | Mr(calc)  | ppm           | Miss            | Score Expect Rank Unique Peptide |                                                                                      |
|       | <a href="#">900</a>                                                                                          | 452.2428     | 902.4711  | 902.4709      | 0.19            | 0 19 0.026 1 U                   | <a href="#">R.QTVDEALK.D</a>                                                         |

|                                                                                                                     |                                                |              |           |               |                 |                                                           |
|---------------------------------------------------------------------------------------------------------------------|------------------------------------------------|--------------|-----------|---------------|-----------------|-----------------------------------------------------------|
| 33.                                                                                                                 | <a href="#">3::046861 YGIQ_ECOLI</a>           | Mass: 84223  | Score: 19 | Matches: 1(1) | Sequences: 1(1) | emPAI: 0.05                                               |
| UPF0313 protein YgiQ OS=Escherichia coli (strain K12) OX=83333 GN=ygiQ PE=3 SV=3                                    |                                                |              |           |               |                 |                                                           |
| Query Observed Mr(expt) Mr(calc) ppm Miss Score Expect Rank Unique Peptide                                          |                                                |              |           |               |                 |                                                           |
|                                                                                                                     | <a href="#">6614</a>                           | 528.5888     | 1582.7445 | 1582.7449     | -0.22           | 1 19 0.04 1 U K.TYVLLP\$FEKVK.G                           |
| 34.                                                                                                                 | <a href="#">3::POACY1 YDJA_ECOLI</a>           | Mass: 20217  | Score: 19 | Matches: 1(1) | Sequences: 1(1) | emPAI: 0.23                                               |
| Putative NAD(P)H nitroreductase YdJA OS=Escherichia coli (strain K12) OX=83333 GN=ydJA PE=1 SV=1                    |                                                |              |           |               |                 |                                                           |
| Query Observed Mr(expt) Mr(calc) ppm Miss Score Expect Rank Unique Peptide                                          |                                                |              |           |               |                 |                                                           |
|                                                                                                                     | <a href="#">8068</a>                           | 880.9706     | 1759.9266 | 1759.9362     | -5.49           | 2 19 0.035 1 U -.M\$ALELLINRRSASR.L                       |
| 35.                                                                                                                 | <a href="#">3::P63224 GMHA_ECOLI</a>           | Mass: 20973  | Score: 18 | Matches: 1(1) | Sequences: 1(1) | emPAI: 0.22                                               |
| Phosphoheptose isomerase OS=Escherichia coli (strain K12) OX=83333 GN=gmHA PE=1 SV=1                                |                                                |              |           |               |                 |                                                           |
| Query Observed Mr(expt) Mr(calc) ppm Miss Score Expect Rank Unique Peptide                                          |                                                |              |           |               |                 |                                                           |
|                                                                                                                     | <a href="#">5154</a>                           | 725.3482     | 1448.6818 | 1448.6929     | -7.71           | 1 18 0.033 1 U K.DGGK\$MAGTADIEIR.V                       |
| 36.                                                                                                                 | <a href="#">3::Y9HVXQ YPA\$A_ECOLI</a>         | Mass: 6876   | Score: 18 | Matches: 1(1) | Sequences: 1(1) | emPAI: 0.80                                               |
| Uncharacterized protein YpaA OS=Escherichia coli (strain K12) OX=83333 GN=ypaA PE=4 SV=1                            |                                                |              |           |               |                 |                                                           |
| Query Observed Mr(expt) Mr(calc) ppm Miss Score Expect Rank Unique Peptide                                          |                                                |              |           |               |                 |                                                           |
|                                                                                                                     | <a href="#">5318</a>                           | 732.8890     | 1463.7635 | 1463.7555     | 5.51            | 1 18 0.043 1 U K.IALR\$MLEGGFDR.D                         |
| 37.                                                                                                                 | <a href="#">3::POA6H5 H\$LIU_ECOLI</a>         | Mass: 49677  | Score: 18 | Matches: 1(1) | Sequences: 1(1) | emPAI: 0.09                                               |
| ATP-dependent protease ATPase subunit HsIU OS=Escherichia coli (strain K12) OX=83333 GN=hsIU PE=1 SV=1              |                                                |              |           |               |                 |                                                           |
| Query Observed Mr(expt) Mr(calc) ppm Miss Score Expect Rank Unique Peptide                                          |                                                |              |           |               |                 |                                                           |
|                                                                                                                     | <a href="#">535</a>                            | 416.7247     | 831.4348  | 831.4338      | 1.27            | 0 18 0.017 1 U R.DLTDAAVK.M                               |
| 38.                                                                                                                 | <a href="#">3::P02943 L\$MBR_ECOLI</a>         | Mass: 49995  | Score: 18 | Matches: 1(1) | Sequences: 1(1) | emPAI: 0.09                                               |
| Maltoporin OS=Escherichia coli (strain K12) OX=83333 GN=lamb PE=1 SV=1                                              |                                                |              |           |               |                 |                                                           |
| Query Observed Mr(expt) Mr(calc) ppm Miss Score Expect Rank Unique Peptide                                          |                                                |              |           |               |                 |                                                           |
|                                                                                                                     | <a href="#">113</a>                            | 366.2242     | 730.4338  | 730.4337      | 0.15            | 0 18 0.017 1 U K.L\$LAATR.S                               |
| 39.                                                                                                                 | <a href="#">3::P52101 G\$LRK_ECOLI</a>         | Mass: 53639  | Score: 18 | Matches: 1(1) | Sequences: 1(1) | emPAI: 0.08                                               |
| Sensor histidine kinase GlrK OS=Escherichia coli (strain K12) OX=83333 GN=glrK PE=1 SV=3                            |                                                |              |           |               |                 |                                                           |
| Query Observed Mr(expt) Mr(calc) ppm Miss Score Expect Rank Unique Peptide                                          |                                                |              |           |               |                 |                                                           |
|                                                                                                                     | <a href="#">94</a>                             | 364.1959     | 726.3772  | 726.3773      | -0.04           | 0 18 0.017 1 U R.\$SSLHGAR.V                              |
| 40.                                                                                                                 | <a href="#">3::P68644 F\$IXC_ECOLI</a>         | Mass: 45902  | Score: 18 | Matches: 1(1) | Sequences: 1(1) | emPAI: 0.10                                               |
| Protein FixC OS=Escherichia coli (strain K12) OX=83333 GN=fixC PE=3 SV=1                                            |                                                |              |           |               |                 |                                                           |
| Query Observed Mr(expt) Mr(calc) ppm Miss Score Expect Rank Unique Peptide                                          |                                                |              |           |               |                 |                                                           |
|                                                                                                                     | <a href="#">8291</a>                           | 447.9621     | 1787.8193 | 1787.8165     | 1.57            | 1 18 0.037 1 U R.DL\$FIDG\$APEL\$MRK.K                    |
| 41.                                                                                                                 | <a href="#">3::P77766 R\$NAAM_ECOLI</a>        | Mass: 32902  | Score: 17 | Matches: 1(1) | Sequences: 1(1) | emPAI: 0.14                                               |
| 5'-3' exoribonuclease OS=Escherichia coli (strain K12) OX=83333 GN=yxiV PE=1 SV=1                                   |                                                |              |           |               |                 |                                                           |
| Query Observed Mr(expt) Mr(calc) ppm Miss Score Expect Rank Unique Peptide                                          |                                                |              |           |               |                 |                                                           |
|                                                                                                                     | <a href="#">397</a>                            | 400.7352     | 799.4559  | 799.4552      | 0.87            | 0 17 0.02 2 U R.AQLIAER.L                                 |
| 42.                                                                                                                 | <a href="#">3::P80645 S\$SUD_ECOLI</a>         | Mass: 41768  | Score: 17 | Matches: 1(1) | Sequences: 1(1) | emPAI: 0.11                                               |
| Alkanesulfonate monooxygenase OS=Escherichia coli (strain K12) OX=83333 GN=ssuD PE=1 SV=3                           |                                                |              |           |               |                 |                                                           |
| Query Observed Mr(expt) Mr(calc) ppm Miss Score Expect Rank Unique Peptide                                          |                                                |              |           |               |                 |                                                           |
|                                                                                                                     | <a href="#">296</a>                            | 387.7090     | 773.4034  | 773.4032      | 0.33            | 0 17 0.018 1 U R.GAATLDR.L                                |
| 43.                                                                                                                 | <a href="#">3::P75958 L\$OLE_ECOLI</a>         | Mass: 45429  | Score: 17 | Matches: 1(1) | Sequences: 1(1) | emPAI: 0.10                                               |
| Lipoprotein-releasing system transmembrane protein LoIE OS=Escherichia coli (strain K12) OX=83333 GN=loIE PE=1 SV=3 |                                                |              |           |               |                 |                                                           |
| Query Observed Mr(expt) Mr(calc) ppm Miss Score Expect Rank Unique Peptide                                          |                                                |              |           |               |                 |                                                           |
|                                                                                                                     | <a href="#">4299</a>                           | 443.2331     | 1326.6775 | 1326.6892     | -8.81           | 1 17 0.04 1 U R.ASNIDPARVLSGQ.-                           |
| 44.                                                                                                                 | <a href="#">3::P76399 M\$DTG_ECOLI</a>         | Mass: 111168 | Score: 17 | Matches: 1(1) | Sequences: 1(1) | emPAI: 0.04                                               |
| Multidrug resistance protein MdtC OS=Escherichia coli (strain K12) OX=83333 GN=mdtC PE=1 SV=1                       |                                                |              |           |               |                 |                                                           |
| Query Observed Mr(expt) Mr(calc) ppm Miss Score Expect Rank Unique Peptide                                          |                                                |              |           |               |                 |                                                           |
|                                                                                                                     | <a href="#">13433</a>                          | 1163.2966    | 3486.8679 | 3486.8455     | 6.41            | 2 17 0.043 1 U R.NAGMTNAK\$PAILL\$MIRKLP\$EANIQTVD\$SIR.A |
| 45.                                                                                                                 | <a href="#">3::POAEM0 F\$K\$BX_ECOLI</a>       | Mass: 16071  | Score: 17 | Matches: 1(1) | Sequences: 1(1) | emPAI: 0.30                                               |
| FKBP-type 16 kDa peptidyl-prolyl cis-trans isomerase OS=Escherichia coli (strain K12) OX=83333 GN=fkpB PE=1 SV=2    |                                                |              |           |               |                 |                                                           |
| Query Observed Mr(expt) Mr(calc) ppm Miss Score Expect Rank Unique Peptide                                          |                                                |              |           |               |                 |                                                           |
|                                                                                                                     | <a href="#">13461</a>                          | 881.5934     | 3522.3444 | 3522.3506     | -1.76           | 1 17 0.039 1 U -.M\$ESVQ\$N\$AVLVHFTLKLDDGT\$IAE\$SR.N    |
| 46.                                                                                                                 | <a href="#">3::POAC88 G\$M4D_ECOLI</a>         | Mass: 42191  | Score: 17 | Matches: 1(1) | Sequences: 1(1) | emPAI: 0.11                                               |
| GDP-mannose 4,6-dehydratase OS=Escherichia coli (strain K12) OX=83333 GN=gmd PE=1 SV=1                              |                                                |              |           |               |                 |                                                           |
| Query Observed Mr(expt) Mr(calc) ppm Miss Score Expect Rank Unique Peptide                                          |                                                |              |           |               |                 |                                                           |
|                                                                                                                     | <a href="#">134</a>                            | 368.2053     | 734.3961  | 734.3963      | -0.19           | 0 17 0.019 1 U R.SPYAVAK.L                                |
| 47.                                                                                                                 | <a href="#">3::AOA7H2C769 AOA7H2C769_ECOLI</a> | Mass: 37383  | Score: 17 | Matches: 1(1) | Sequences: 1(1) | emPAI: 0.12                                               |
| Putative type II secretion system C-type protein YghF OS=Escherichia coli (strain K12) OX=83333 GN=yghF PE=3 SV=1   |                                                |              |           |               |                 |                                                           |
| Query Observed Mr(expt) Mr(calc) ppm Miss Score Expect Rank Unique Peptide                                          |                                                |              |           |               |                 |                                                           |
|                                                                                                                     | <a href="#">5116</a>                           | 722.3780     | 1442.7413 | 1442.7323     | 6.28            | 0 17 0.046 1 U K.IFN\$YIQLTPYR.K                          |
| Proteins matching the same set of peptides:                                                                         |                                                |              |           |               |                 |                                                           |
|                                                                                                                     | <a href="#">3::046834 YGHF_ECOLI</a>           | Mass: 37383  | Score: 17 | Matches: 1(1) | Sequences: 1(1) |                                                           |
| Putative type II secretion system C-type protein YghF OS=Escherichia coli (strain K12) OX=83333 GN=yghF PE=3 SV=2   |                                                |              |           |               |                 |                                                           |
| 48.                                                                                                                 | <a href="#">3::POA840 S\$URE_ECOLI</a>         | Mass: 27169  | Score: 17 | Matches: 1(1) | Sequences: 1(1) | emPAI: 0.17                                               |
| 5'/3'-nucleotidase SurE OS=Escherichia coli (strain K12) OX=83333 GN=surE PE=1 SV=1                                 |                                                |              |           |               |                 |                                                           |
| Query Observed Mr(expt) Mr(calc) ppm Miss Score Expect Rank Unique Peptide                                          |                                                |              |           |               |                 |                                                           |
|                                                                                                                     | <a href="#">10700</a>                          | 577.5629     | 2306.2224 | 2306.2052     | 7.45            | 1 17 0.05 1 U -.M\$RILLSNDDGVHAPGIQTLAK.A                 |
| 49.                                                                                                                 | <a href="#">3::P21893 R\$ECJ_ECOLI</a>         | Mass: 63634  | Score: 17 | Matches: 1(1) | Sequences: 1(1) | emPAI: 0.07                                               |
| Single-stranded-DNA-specific exonuclease RecJ OS=Escherichia coli (strain K12) OX=83333 GN=recJ PE=1 SV=2           |                                                |              |           |               |                 |                                                           |

| Query | Observed                                                                                                                                                                                                    | Mr(expt)  | Mr(calc)  | ppm   | Miss | Score | Expect | Rank | Unique | Peptide         |
|-------|-------------------------------------------------------------------------------------------------------------------------------------------------------------------------------------------------------------|-----------|-----------|-------|------|-------|--------|------|--------|-----------------|
| 2228  | 543.8046                                                                                                                                                                                                    | 1085.5947 | 1085.6015 | -6.31 | 1    | 17    | 0.037  | 1    | U      | -_MKQQQLR.R     |
| <hr/> |                                                                                                                                                                                                             |           |           |       |      |       |        |      |        |                 |
| 50.   | 3::P30852 SMF_ECOLI Mass: 41158 Score: 17 Matches: 1(1) Sequences: 1(1) emPAI: 0.11<br>Protein Smf OS=Escherichia coli (strain K12) OX=83333 GN=smf PE=3 SV=1                                               |           |           |       |      |       |        |      |        |                 |
| Query | Observed                                                                                                                                                                                                    | Mr(expt)  | Mr(calc)  | ppm   | Miss | Score | Expect | Rank | Unique | Peptide         |
| 730   | 435.7076                                                                                                                                                                                                    | 869.4007  | 869.4008  | -0.14 | 0    | 17    | 0.025  | 1    | U      | R.SGSLVIAR.C    |
| <hr/> |                                                                                                                                                                                                             |           |           |       |      |       |        |      |        |                 |
| 51.   | 3::P33668 YBBC_ECOLI Mass: 14257 Score: 17 Matches: 1(1) Sequences: 1(1) emPAI: 0.34<br>Uncharacterized protein Ybbc OS=Escherichia coli (strain K12) OX=83333 GN=ybbc PE=2 SV=1                            |           |           |       |      |       |        |      |        |                 |
| Query | Observed                                                                                                                                                                                                    | Mr(expt)  | Mr(calc)  | ppm   | Miss | Score | Expect | Rank | Unique | Peptide         |
| 1649  | 509.7495                                                                                                                                                                                                    | 1017.4845 | 1017.4896 | -5.04 | 1    | 17    | 0.032  | 1    | U      | K.YSVKIVK.T     |
| <hr/> |                                                                                                                                                                                                             |           |           |       |      |       |        |      |        |                 |
| 52.   | 3::P38035 RTCRC_ECOLI Mass: 60604 Score: 16 Matches: 1(1) Sequences: 1(1) emPAI: 0.07<br>Transcriptional regulatory protein RtcR OS=Escherichia coli (strain K12) OX=83333 GN=rtcR PE=4 SV=2                |           |           |       |      |       |        |      |        |                 |
| Query | Observed                                                                                                                                                                                                    | Mr(expt)  | Mr(calc)  | ppm   | Miss | Score | Expect | Rank | Unique | Peptide         |
| 1216  | 479.2299                                                                                                                                                                                                    | 956.4453  | 956.4386  | 7.03  | 0    | 16    | 0.035  | 1    | U      | R.MATFATSGR.I   |
| <hr/> |                                                                                                                                                                                                             |           |           |       |      |       |        |      |        |                 |
| 53.   | 3::P23871 HEMH_ECOLI Mass: 36089 Score: 16 Matches: 1(1) Sequences: 1(1) emPAI: 0.12<br>Ferrochelatase OS=Escherichia coli (strain K12) OX=83333 GN=hemH PE=1 SV=3                                          |           |           |       |      |       |        |      |        |                 |
| Query | Observed                                                                                                                                                                                                    | Mr(expt)  | Mr(calc)  | ppm   | Miss | Score | Expect | Rank | Unique | Peptide         |
| 4465  | 451.9139                                                                                                                                                                                                    | 1352.7199 | 1352.7329 | -9.64 | 2    | 16    | 0.034  | 1    | U      | R.KRSIPGIFSR.D  |
| <hr/> |                                                                                                                                                                                                             |           |           |       |      |       |        |      |        |                 |
| 54.   | 3::P00634 PPB_ECOLI Mass: 49636 Score: 16 Matches: 1(1) Sequences: 1(1) emPAI: 0.09<br>Alkaline phosphatase OS=Escherichia coli (strain K12) OX=83333 GN=phoA PE=1 SV=1                                     |           |           |       |      |       |        |      |        |                 |
| Query | Observed                                                                                                                                                                                                    | Mr(expt)  | Mr(calc)  | ppm   | Miss | Score | Expect | Rank | Unique | Peptide         |
| 3426  | 614.2892                                                                                                                                                                                                    | 1226.5638 | 1226.5601 | 2.99  | 1    | 16    | 0.046  | 1    | U      | R.KCYGPSATSEK.C |
| <hr/> |                                                                                                                                                                                                             |           |           |       |      |       |        |      |        |                 |
| 55.   | 3::Q46864 MQSA_ECOLI Mass: 14922 Score: 16 Matches: 1(1) Sequences: 1(1) emPAI: 0.32<br>Antitoxin MqsA OS=Escherichia coli (strain K12) OX=83333 GN=mqsA PE=1 SV=1                                          |           |           |       |      |       |        |      |        |                 |
| Query | Observed                                                                                                                                                                                                    | Mr(expt)  | Mr(calc)  | ppm   | Miss | Score | Expect | Rank | Unique | Peptide         |
| 862   | 449.2430                                                                                                                                                                                                    | 896.4714  | 896.4732  | -2.03 | 1    | 16    | 0.025  | 1    | U      | K.KLSLTQK.E     |
| <hr/> |                                                                                                                                                                                                             |           |           |       |      |       |        |      |        |                 |
| 56.   | 1::sp DHE3_BOVIN  Mass: 61815 Score: 16 Matches: 1(1) Sequences: 1(1) emPAI: 0.07<br>sp DHE3_BOVIN                                                                                                          |           |           |       |      |       |        |      |        |                 |
| Query | Observed                                                                                                                                                                                                    | Mr(expt)  | Mr(calc)  | ppm   | Miss | Score | Expect | Rank | Unique | Peptide         |
| 282   | 386.1642                                                                                                                                                                                                    | 770.3139  | 770.3211  | -9.31 | 0    | 16    | 0.025  | 1    | U      | R.ISGASEK.D     |
| <hr/> |                                                                                                                                                                                                             |           |           |       |      |       |        |      |        |                 |
| 57.   | 3::P0A624 SPOT_ECOLI Mass: 79748 Score: 16 Matches: 2(2) Sequences: 1(1) emPAI: 0.06<br>Bifunctional (p)ppGpp synthase/hydrolase SpoT OS=Escherichia coli (strain K12) OX=83333 GN=spoT PE=1 SV=1           |           |           |       |      |       |        |      |        |                 |
| Query | Observed                                                                                                                                                                                                    | Mr(expt)  | Mr(calc)  | ppm   | Miss | Score | Expect | Rank | Unique | Peptide         |
| 874   | 450.2146                                                                                                                                                                                                    | 898.4147  | 898.4201  | -6.03 | 0    | 15    | 0.033  | 1    | U      | K.DYIAIPK.A 873 |
| <hr/> |                                                                                                                                                                                                             |           |           |       |      |       |        |      |        |                 |
| 58.   | 3::P37650 BCSC_ECOLI Mass: 127760 Score: 16 Matches: 1(1) Sequences: 1(1) emPAI: 0.03<br>Cellulose synthase operon protein C OS=Escherichia coli (strain K12) OX=83333 GN=bcsC PE=1 SV=3                    |           |           |       |      |       |        |      |        |                 |
| Query | Observed                                                                                                                                                                                                    | Mr(expt)  | Mr(calc)  | ppm   | Miss | Score | Expect | Rank | Unique | Peptide         |
| 1350  | 488.7422                                                                                                                                                                                                    | 975.4698  | 975.4733  | -3.58 | 1    | 16    | 0.037  | 1    | U      | K.SNAGREGASK.I  |
| <hr/> |                                                                                                                                                                                                             |           |           |       |      |       |        |      |        |                 |
| 59.   | 3::P39277 YJEH_ECOLI Mass: 45261 Score: 15 Matches: 1(1) Sequences: 1(1) emPAI: 0.10<br>L-methionine/branched-chain amino acid exporter YjeH OS=Escherichia coli (strain K12) OX=83333 GN=yjeH PE=1 SV=1    |           |           |       |      |       |        |      |        |                 |
| Query | Observed                                                                                                                                                                                                    | Mr(expt)  | Mr(calc)  | ppm   | Miss | Score | Expect | Rank | Unique | Peptide         |
| 1251  | 480.7538                                                                                                                                                                                                    | 959.4929  | 959.4924  | 0.60  | 1    | 15    | 0.044  | 1    | U      | R.KTPENGITT.-   |
| <hr/> |                                                                                                                                                                                                             |           |           |       |      |       |        |      |        |                 |
| 60.   | 3::P77293 GTRB_ECOLI Mass: 34614 Score: 15 Matches: 1(1) Sequences: 1(1) emPAI: 0.13<br>Prophage bactoprenol glucosyl transferase homolog OS=Escherichia coli (strain K12) OX=83333 GN=yfdH PE=1 SV=1       |           |           |       |      |       |        |      |        |                 |
| Query | Observed                                                                                                                                                                                                    | Mr(expt)  | Mr(calc)  | ppm   | Miss | Score | Expect | Rank | Unique | Peptide         |
| 457   | 408.7265                                                                                                                                                                                                    | 815.4385  | 815.4389  | -0.42 | 0    | 15    | 0.031  | 1    | U      | R.DVVENIK.L     |
| <hr/> |                                                                                                                                                                                                             |           |           |       |      |       |        |      |        |                 |
| 61.   | 3::P36678 GSPM_ECOLI Mass: 17280 Score: 15 Matches: 1(1) Sequences: 1(1) emPAI: 0.27<br>Putative type II secretion system protein M OS=Escherichia coli (strain K12) OX=83333 GN=gspM PE=2 SV=2             |           |           |       |      |       |        |      |        |                 |
| Query | Observed                                                                                                                                                                                                    | Mr(expt)  | Mr(calc)  | ppm   | Miss | Score | Expect | Rank | Unique | Peptide         |
| 2219  | 543.3199                                                                                                                                                                                                    | 1084.6252 | 1084.6240 | 1.09  | 1    | 15    | 0.042  | 1    | U      | K.NILLEAKR.E    |
| <hr/> |                                                                                                                                                                                                             |           |           |       |      |       |        |      |        |                 |
| 62.   | 3::P16869 FHUE_ECOLI Mass: 81239 Score: 15 Matches: 1(1) Sequences: 1(1) emPAI: 0.05<br>FhuE receptor OS=Escherichia coli (strain K12) OX=83333 GN=fhuE PE=1 SV=2                                           |           |           |       |      |       |        |      |        |                 |
| Query | Observed                                                                                                                                                                                                    | Mr(expt)  | Mr(calc)  | ppm   | Miss | Score | Expect | Rank | Unique | Peptide         |
| 662   | 428.6925                                                                                                                                                                                                    | 855.3704  | 855.3739  | -4.08 | 0    | 15    | 0.033  | 1    | U      | K.AVDGIYSK.G    |
| <hr/> |                                                                                                                                                                                                             |           |           |       |      |       |        |      |        |                 |
| 63.   | 3::P76161 RFQ2_ECOLI Mass: 28478 Score: 15 Matches: 1(1) Sequences: 1(1) emPAI: 0.16<br>Prophage antitermination protein Q homolog QuuQ OS=Escherichia coli (strain K12) OX=83333 GN=quuQ PE=3 SV=2         |           |           |       |      |       |        |      |        |                 |
| Query | Observed                                                                                                                                                                                                    | Mr(expt)  | Mr(calc)  | ppm   | Miss | Score | Expect | Rank | Unique | Peptide         |
| 1066  | 466.2461                                                                                                                                                                                                    | 930.4777  | 930.4844  | -7.21 | 0    | 15    | 0.033  | 2    | U      | -_MNLEALPK.Y    |
| <hr/> |                                                                                                                                                                                                             |           |           |       |      |       |        |      |        |                 |
| 64.   | 3::P64570 YQGC_ECOLI Mass: 8166 Score: 15 Matches: 1(1) Sequences: 1(1) emPAI: 0.64<br>Protein YqgC OS=Escherichia coli (strain K12) OX=83333 GN=yqgC PE=1 SV=1                                             |           |           |       |      |       |        |      |        |                 |
| Query | Observed                                                                                                                                                                                                    | Mr(expt)  | Mr(calc)  | ppm   | Miss | Score | Expect | Rank | Unique | Peptide         |
| 3472  | 617.7462                                                                                                                                                                                                    | 1233.4779 | 1233.4883 | -8.45 | 0    | 15    | 0.033  | 1    | U      | -_HGITSGMQSR.D  |
| <hr/> |                                                                                                                                                                                                             |           |           |       |      |       |        |      |        |                 |
| 65.   | 3::P77732 RHMR_ECOLI Mass: 29228 Score: 15 Matches: 1(1) Sequences: 1(1) emPAI: 0.16<br>Uncharacterized HTH-type transcriptional regulator RhmR OS=Escherichia coli (strain K12) OX=83333 GN=rhmR PE=1 SV=1 |           |           |       |      |       |        |      |        |                 |
| Query | Observed                                                                                                                                                                                                    | Mr(expt)  | Mr(calc)  | ppm   | Miss | Score | Expect | Rank | Unique | Peptide         |
| 706   | 432.7089                                                                                                                                                                                                    | 863.4033  | 863.4025  | 0.89  | 0    | 15    | 0.034  | 1    | U      | K.SPFDLQAS.-    |
| <hr/> |                                                                                                                                                                                                             |           |           |       |      |       |        |      |        |                 |
| 66.   | 3::P25772 LIGB_ECOLI Mass: 63425 Score: 14 Matches: 1(1) Sequences: 1(1) emPAI: 0.07<br>DNA ligase B OS=Escherichia coli (strain K12) OX=83333 GN=ligB PE=1 SV=2                                            |           |           |       |      |       |        |      |        |                 |

| Query                | Observed                                                                                                                                                                                                    | Mr (expt) | Mr (calc) | ppm   | Miss | Score | Expect | Rank | Unique | Peptide         |
|----------------------|-------------------------------------------------------------------------------------------------------------------------------------------------------------------------------------------------------------|-----------|-----------|-------|------|-------|--------|------|--------|-----------------|
| <a href="#">150</a>  | 372.7215                                                                                                                                                                                                    | 743.4285  | 743.4290  | -0.62 | 0    | 14    | 0.036  | 1    | U      | R.VNIGSVR.R     |
| <hr/>                |                                                                                                                                                                                                             |           |           |       |      |       |        |      |        |                 |
| 67.                  | <a href="#">3::P75977 YMF ECOLI</a> Mass: 12319 Score: 14 Matches: 1(1) Sequences: 1(1) emPAI: 0.40<br>Uncharacterized protein YmfM OS=Escherichia coli (strain K12) OX=83333 GN=yfmf PE=4 SV=1             |           |           |       |      |       |        |      |        |                 |
| Query                | Observed                                                                                                                                                                                                    | Mr (expt) | Mr (calc) | ppm   | Miss | Score | Expect | Rank | Unique | Peptide         |
| <a href="#">2462</a> | 371.8297                                                                                                                                                                                                    | 1112.4672 | 1112.4652 | 1.87  | 0    | 14    | 0.045  | 1    | U      | M_NSLTIHYR.R    |
| <hr/>                |                                                                                                                                                                                                             |           |           |       |      |       |        |      |        |                 |
| 68.                  | <a href="#">3::P77658 YNA ECOLI</a> Mass: 37094 Score: 14 Matches: 1(1) Sequences: 1(1) emPAI: 0.12<br>Protein YnaA OS=Escherichia coli (strain K12) OX=83333 GN=ynaA PE=4 SV=1                             |           |           |       |      |       |        |      |        |                 |
| Query                | Observed                                                                                                                                                                                                    | Mr (expt) | Mr (calc) | ppm   | Miss | Score | Expect | Rank | Unique | Peptide         |
| <a href="#">1063</a> | 465.7797                                                                                                                                                                                                    | 929.5448  | 929.5406  | 4.53  | 2    | 14    | 0.037  | 1    | U      | R.KIQETRR.E     |
| <hr/>                |                                                                                                                                                                                                             |           |           |       |      |       |        |      |        |                 |
| 69.                  | <a href="#">3::POA7R9 RS11 ECOLI</a> Mass: 13950 Score: 14 Matches: 1(1) Sequences: 1(1) emPAI: 0.35<br>30S ribosomal protein S11 OS=Escherichia coli (strain K12) OX=83333 GN=rpsK PE=1 SV=2               |           |           |       |      |       |        |      |        |                 |
| Query                | Observed                                                                                                                                                                                                    | Mr (expt) | Mr (calc) | ppm   | Miss | Score | Expect | Rank | Unique | Peptide         |
| <a href="#">350</a>  | 393.7395                                                                                                                                                                                                    | 785.4644  | 785.4581  | 7.92  | 1    | 14    | 0.038  | 1    | U      | --MAKAPIR.A     |
| <hr/>                |                                                                                                                                                                                                             |           |           |       |      |       |        |      |        |                 |
| 70.                  | <a href="#">3::P00957 SYA ECOLI</a> Mass: 96315 Score: 14 Matches: 1(1) Sequences: 1(1) emPAI: 0.05<br>Alanine--tRNA ligase OS=Escherichia coli (strain K12) OX=83333 GN=alaS PE=1 SV=2                     |           |           |       |      |       |        |      |        |                 |
| Query                | Observed                                                                                                                                                                                                    | Mr (expt) | Mr (calc) | ppm   | Miss | Score | Expect | Rank | Unique | Peptide         |
| <a href="#">491</a>  | 412.2393                                                                                                                                                                                                    | 822.4640  | 822.4712  | -8.69 | 0    | 14    | 0.039  | 1    | U      | R.VIADHIR.S     |
| <hr/>                |                                                                                                                                                                                                             |           |           |       |      |       |        |      |        |                 |
| 71.                  | <a href="#">3::P07813 SYL ECOLI</a> Mass: 97799 Score: 14 Matches: 1(1) Sequences: 1(1) emPAI: 0.04<br>Leucine--tRNA ligase OS=Escherichia coli (strain K12) OX=83333 GN=leuS PE=1 SV=2                     |           |           |       |      |       |        |      |        |                 |
| Query                | Observed                                                                                                                                                                                                    | Mr (expt) | Mr (calc) | ppm   | Miss | Score | Expect | Rank | Unique | Peptide         |
| <a href="#">712</a>  | 433.2287                                                                                                                                                                                                    | 864.4428  | 864.4388  | 4.61  | 0    | 14    | 0.04   | 1    | U      | R.LHGHVR.N      |
| <hr/>                |                                                                                                                                                                                                             |           |           |       |      |       |        |      |        |                 |
| 72.                  | <a href="#">3::POACZ8 CUSR ECOLI</a> Mass: 25378 Score: 14 Matches: 1(1) Sequences: 1(1) emPAI: 0.18<br>Transcriptional regulatory protein CusR OS=Escherichia coli (strain K12) OX=83333 GN=cusR PE=1 SV=1 |           |           |       |      |       |        |      |        |                 |
| Query                | Observed                                                                                                                                                                                                    | Mr (expt) | Mr (calc) | ppm   | Miss | Score | Expect | Rank | Unique | Peptide         |
| <a href="#">1357</a> | 489.2346                                                                                                                                                                                                    | 976.4547  | 976.4502  | 4.63  | 0    | 14    | 0.04   | 1    | U      | K.IDNDFEPK.L    |
| <hr/>                |                                                                                                                                                                                                             |           |           |       |      |       |        |      |        |                 |
| 73.                  | <a href="#">3::P24215 UXUA ECOLI</a> Mass: 44981 Score: 14 Matches: 1(1) Sequences: 1(1) emPAI: 0.10<br>Mannanase OS=Escherichia coli (strain K12) OX=83333 GN=uxuA PE=1 SV=2                               |           |           |       |      |       |        |      |        |                 |
| Query                | Observed                                                                                                                                                                                                    | Mr (expt) | Mr (calc) | ppm   | Miss | Score | Expect | Rank | Unique | Peptide         |
| <a href="#">818</a>  | 443.2834                                                                                                                                                                                                    | 884.5523  | 884.5443  | 9.02  | 1    | 14    | 0.041  | 1    | U      | R.LKGLAEVR.G    |
| <hr/>                |                                                                                                                                                                                                             |           |           |       |      |       |        |      |        |                 |
| 74.                  | <a href="#">3::P38134 ETK ECOLI</a> Mass: 81191 Score: 14 Matches: 1(1) Sequences: 1(1) emPAI: 0.05<br>Tyrosine-protein kinase etk OS=Escherichia coli (strain K12) OX=83333 GN=etk PE=1 SV=2               |           |           |       |      |       |        |      |        |                 |
| Query                | Observed                                                                                                                                                                                                    | Mr (expt) | Mr (calc) | ppm   | Miss | Score | Expect | Rank | Unique | Peptide         |
| <a href="#">2422</a> | 555.2141                                                                                                                                                                                                    | 1108.4135 | 1108.4025 | 9.97  | 0    | 14    | 0.042  | 1    | U      | K.EVSLSMQR.L    |
| <hr/>                |                                                                                                                                                                                                             |           |           |       |      |       |        |      |        |                 |
| 75.                  | <a href="#">3::POADT8 YGIW ECOLI</a> Mass: 23062 Score: 14 Matches: 1(1) Sequences: 1(1) emPAI: 0.20<br>Uncharacterized protein YgiW OS=Escherichia coli (strain K12) OX=83333 GN=ygiW PE=3 SV=1            |           |           |       |      |       |        |      |        |                 |
| Query                | Observed                                                                                                                                                                                                    | Mr (expt) | Mr (calc) | ppm   | Miss | Score | Expect | Rank | Unique | Peptide         |
| <a href="#">2937</a> | 580.7940                                                                                                                                                                                                    | 1159.5734 | 1159.5721 | 1.13  | 0    | 14    | 0.049  | 1    | U      | K.VDAASVOLDDK.Q |
| <hr/>                |                                                                                                                                                                                                             |           |           |       |      |       |        |      |        |                 |
| 76.                  | <a href="#">3::POAFA2 NARX ECOLI</a> Mass: 67669 Score: 13 Matches: 1(1) Sequences: 1(1) emPAI: 0.07<br>Nitrate/nitrite sensor protein NarX OS=Escherichia coli (strain K12) OX=83333 GN=narX PE=1 SV=1     |           |           |       |      |       |        |      |        |                 |
| Query                | Observed                                                                                                                                                                                                    | Mr (expt) | Mr (calc) | ppm   | Miss | Score | Expect | Rank | Unique | Peptide         |
| <a href="#">196</a>  | 378.2061                                                                                                                                                                                                    | 754.3976  | 754.3973  | 0.36  | 0    | 13    | 0.047  | 1    | U      | K.TAGLEHK.N     |
| <hr/>                |                                                                                                                                                                                                             |           |           |       |      |       |        |      |        |                 |
| 77.                  | <a href="#">3::P20099 BISC ECOLI</a> Mass: 86366 Score: 13 Matches: 1(1) Sequences: 1(1) emPAI: 0.05<br>Biotin sulfoxide reductase OS=Escherichia coli (strain K12) OX=83333 GN=bisC PE=1 SV=3              |           |           |       |      |       |        |      |        |                 |
| Query                | Observed                                                                                                                                                                                                    | Mr (expt) | Mr (calc) | ppm   | Miss | Score | Expect | Rank | Unique | Peptide         |
| <a href="#">254</a>  | 384.6712                                                                                                                                                                                                    | 767.3278  | 767.3232  | 6.08  | 0    | 13    | 0.047  | 1    | U      | --ANSSSR.Y      |
| <hr/>                |                                                                                                                                                                                                             |           |           |       |      |       |        |      |        |                 |
| 78.                  | <a href="#">3::P33362 YEHZ ECOLI</a> Score: 13 Matches: 1(1) Sequences: 1(1)<br>Glycine betaine-binding protein YehZ OS=Escherichia coli (strain K12) OX=83333 GN=yehZ PE=1 SV=1                            |           |           |       |      |       |        |      |        |                 |
| Query                | Observed                                                                                                                                                                                                    | Mr (expt) | Mr (calc) | ppm   | Miss | Score | Expect | Rank | Unique | Peptide         |
| <a href="#">1066</a> | 466.2461                                                                                                                                                                                                    | 930.4777  | 930.4770  | 0.72  | 1    | 13    | 0.048  | 3    | U      | R.QDVAEKNK.L    |
| <hr/>                |                                                                                                                                                                                                             |           |           |       |      |       |        |      |        |                 |
| 79.                  | <a href="#">3::P39358 YJHG ECOLI</a> Score: 13 Matches: 1(1) Sequences: 1(1)<br>D-xylonate dehydratase YjhG OS=Escherichia coli (strain K12) OX=83333 GN=yjhG PE=1 SV=2                                     |           |           |       |      |       |        |      |        |                 |
| Query                | Observed                                                                                                                                                                                                    | Mr (expt) | Mr (calc) | ppm   | Miss | Score | Expect | Rank | Unique | Peptide         |
| <a href="#">150</a>  | 372.7215                                                                                                                                                                                                    | 743.4285  | 743.4290  | -0.62 | 0    | 13    | 0.049  | 2    | U      | K.VQTIGAR.F     |

Proteins matching the same set of peptides:

[3::P77596|YAGF ECOLI](#) Mass: 69926 Score: 13 Matches: 1(1) Sequences: 1(1)  
D-xylonate dehydratase YagF OS=Escherichia coli (strain K12) OX=83333 GN=yagF PE=1 SV=1
